# Supplementary material for: Systematic genetic analysis of the MHC region reveals mechanistic underpinnings of HLA type associations with disease
Source: eLife journal article supplement (doi:10.7554/elife.48476), 2019-11-20
Supplement: supp [file elife-48476-supp-v1.zip]

Archive with 21 entries (21 files):
- elife_poa_e48476_Figure_2_figure_supplement_1.jpg
- elife_poa_e48476_Supplementary_file_4.xlsx
- elife_poa_e48476_Figure_8_figure_supplement_1.jpg
- elife_poa_e48476_Supplementary_file_5.xlsx
- elife_poa_e48476_Figure_3_figure_supplement_1.jpg
- elife_poa_e48476_Supplementary_file_10.xlsx
- elife_poa_e48476_Supplementary_file_1.xlsx
- elife_poa_e48476_Supplementary_file_8.xlsx
- elife_poa_e48476_Figure_7_figure_supplement_1.jpg
- elife_poa_e48476_Transparent_Reporting_File.pdf
- elife_poa_e48476_Figure_4_figure_supplement_4.tif
- elife_poa_e48476_Supplementary_file_9.xlsx
- elife_poa_e48476_Figure_4_figure_supplement_3.jpg
- elife_poa_e48476_Figure_4_figure_supplement_1.jpg
- elife_poa_e48476_Figure_4_figure_supplement_2.jpg
- elife_poa_e48476_Supplementary_file_2.xlsx
- elife_poa_e48476_Figure_4_figure_supplement_5.jpg
- elife_poa_e48476_Supplementary_file_3.xlsx
- elife_poa_e48476_Supplementary_file_6.xlsx
- elife_poa_e48476_Supplementary_file_7.xlsx
- elife_poa_e48476_Figure_3_figure_supplement_2.jpg
