# Supplementary material for: Systematic genetic analysis of the MHC region reveals mechanistic underpinnings of HLA type associations with disease
Source: eLife journal article supplement (doi:10.7554/elife.48476), 2019-11-20
Supplement: supp [file elife-48476-supp-v1.zip › elife_poa_e48476_Supplementary_file_6.xlsx]

## Sheet: Table S6A all eQTLs
eGene information			Variant information					eQTL information
Gene ID	Gene name	TSS	Position	Reference	Alternative	Allele frequency	rsID	Type	Beta	Standard error of beta	p-value	Bonferroni-corrected p-value
ENSG00000066379.10	ZNRD1	30026675	29720961	C	G	0.380045	rs4713243	Primary	0.5664	0.118317	1.69183e-06	0.0765231
ENSG00000066379.10	ZNRD1	30026675	29723674	T	C	0.380045	rs4947236	Primary	0.5664	0.118317	1.69183e-06	0.0765231
ENSG00000066379.10	ZNRD1	30026675	29730504	A	G	0.380045	rs9258275	Primary	0.5664	0.118317	1.69183e-06	0.0765231
ENSG00000066379.10	ZNRD1	30026675	29733123	T	A	0.0459641	rs9258278	Primary	-1.87455	0.249775	6.15064e-14	2.78199e-09
ENSG00000066379.10	ZNRD1	30026675	29733223	G	A	0.269058	rs1633041	Primary	-0.789196	0.135327	5.48372e-09	0.000248034
ENSG00000066379.10	ZNRD1	30026675	29733288	A	C	0.266816	rs1737059	Primary	-0.779838	0.136794	1.19243e-08	0.000539347
ENSG00000066379.10	ZNRD1	30026675	29733390	C	T	0.316143	rs2735049	Primary	0.60249	0.12297	9.60913e-07	0.043463
ENSG00000066379.10	ZNRD1	30026675	29733420	T	C	0.266816	rs1737057	Primary	-0.779838	0.136794	1.19243e-08	0.000539347
ENSG00000066379.10	ZNRD1	30026675	29733537	G	C	0.266816	rs1737056	Primary	-0.779838	0.136794	1.19243e-08	0.000539347
ENSG00000066379.10	ZNRD1	30026675	29733807	C	A	0.266816	rs1737054	Primary	-0.779838	0.136794	1.19243e-08	0.000539347
ENSG00000066379.10	ZNRD1	30026675	29733838	T	A	0.317265	rs2517931	Primary	0.596378	0.122341	1.08957e-06	0.0492822
ENSG00000066379.10	ZNRD1	30026675	29734098	G	A	0.337444	rs2735046	Primary	0.673533	0.124133	5.76711e-08	0.00260852
ENSG00000066379.10	ZNRD1	30026675	29734477	A	G	0.337444	rs2523754	Primary	0.673533	0.124133	5.76711e-08	0.00260852
ENSG00000066379.10	ZNRD1	30026675	29734696	A	G	0.266816	rs1737050	Primary	-0.779838	0.136794	1.19243e-08	0.000539347
ENSG00000066379.10	ZNRD1	30026675	29734727	A	G	0.340807	rs2523753	Primary	0.685278	0.122147	2.0203e-08	0.000913801
ENSG00000066379.10	ZNRD1	30026675	29735134	G	A	0.266816	rs1612392	Primary	-0.779838	0.136794	1.19243e-08	0.000539347
ENSG00000066379.10	ZNRD1	30026675	29735391	T	C	0.266816	rs2735044	Primary	-0.779838	0.136794	1.19243e-08	0.000539347
ENSG00000066379.10	ZNRD1	30026675	29735455	C	A	0.266816	rs9258288	Primary	-0.779838	0.136794	1.19243e-08	0.000539347
ENSG00000066379.10	ZNRD1	30026675	29735469	G	A	0.266816	rs9258289	Primary	-0.779838	0.136794	1.19243e-08	0.000539347
ENSG00000066379.10	ZNRD1	30026675	29735492	T	C	0.284753	rs9258290	Primary	-0.705138	0.134972	1.74788e-07	0.00790582
ENSG00000066379.10	ZNRD1	30026675	29735493	G	A	0.284753	rs9258291	Primary	-0.705138	0.134972	1.74788e-07	0.00790582
ENSG00000066379.10	ZNRD1	30026675	29735533	T	C	0.31278	rs2844844	Primary	0.582841	0.122759	2.05599e-06	0.0929944
ENSG00000066379.10	ZNRD1	30026675	29735659	G	A	0.0493274	rs9258294	Primary	-1.91871	0.247055	8.10463e-15	3.6658e-10
ENSG00000066379.10	ZNRD1	30026675	29736011	G	C	0.269058	rs1737044	Primary	-0.789196	0.135327	5.48372e-09	0.000248034
ENSG00000066379.10	ZNRD1	30026675	29736152	A	G	0.293722	rs1737042	Primary	-0.67767	0.132724	3.29305e-07	0.0148948
ENSG00000066379.10	ZNRD1	30026675	29736163	A	G	0.338565	rs3094560	Primary	0.601988	0.117887	3.28217e-07	0.0148456
ENSG00000066379.10	ZNRD1	30026675	29736169	GC	G	0.352018	rs11310284	Primary	0.68893	0.115834	2.72186e-09	0.000123112
ENSG00000066379.10	ZNRD1	30026675	29736229	C	A	0.267937	rs1737041	Primary	-0.790252	0.136088	6.36324e-09	0.000287816
ENSG00000066379.10	ZNRD1	30026675	29736601	T	C	0.269058	rs1737040	Primary	-0.789196	0.135327	5.48372e-09	0.000248034
ENSG00000066379.10	ZNRD1	30026675	29736691	T	C	0.290359	rs1737038	Primary	-0.700359	0.131564	1.01893e-07	0.00460874
ENSG00000066379.10	ZNRD1	30026675	29736792	C	T	0.269058	rs1737037	Primary	-0.789196	0.135327	5.48372e-09	0.000248034
ENSG00000066379.10	ZNRD1	30026675	29736995	T	C	0.289238	rs1737036	Primary	-0.704115	0.131895	9.37534e-08	0.00424056
ENSG00000066379.10	ZNRD1	30026675	29737022	C	T	0.269058	rs1737035	Primary	-0.789196	0.135327	5.48372e-09	0.000248034
ENSG00000066379.10	ZNRD1	30026675	29737074	C	T	0.316143	rs2735043	Primary	0.596058	0.120843	8.11806e-07	0.0367188
ENSG00000066379.10	ZNRD1	30026675	29737159	G	C	0.269058	rs1737034	Primary	-0.789196	0.135327	5.48372e-09	0.000248034
ENSG00000066379.10	ZNRD1	30026675	29737162	G	A	0.316143	rs2247422	Primary	0.596058	0.120843	8.11806e-07	0.0367188
ENSG00000066379.10	ZNRD1	30026675	29737222	A	C	0.269058	rs1737032	Primary	-0.789196	0.135327	5.48372e-09	0.000248034
ENSG00000066379.10	ZNRD1	30026675	29737481	C	T	0.289238	rs1737031	Primary	-0.704115	0.131895	9.37534e-08	0.00424056
ENSG00000066379.10	ZNRD1	30026675	29737595	A	G	0.289238	rs1737029	Primary	-0.704115	0.131895	9.37534e-08	0.00424056
ENSG00000066379.10	ZNRD1	30026675	29737660	AG	A	0.269058	rs377723602	Primary	-0.789196	0.135327	5.48372e-09	0.000248034
ENSG00000066379.10	ZNRD1	30026675	29737677	T	C	0.316143	rs2844843	Primary	0.596058	0.120843	8.11806e-07	0.0367188
ENSG00000066379.10	ZNRD1	30026675	29738287	A	G	0.269058	rs1611270	Primary	-0.789196	0.135327	5.48372e-09	0.000248034
ENSG00000066379.10	ZNRD1	30026675	29738298	G	T	0.269058	rs1611271	Primary	-0.789196	0.135327	5.48372e-09	0.000248034
ENSG00000066379.10	ZNRD1	30026675	29738665	C	G	0.289238	rs1610726	Primary	-0.704115	0.131895	9.37534e-08	0.00424056
ENSG00000066379.10	ZNRD1	30026675	29738682	ACACTCTCCGGTGAGC	A	0.316143	rs143877566	Primary	0.596058	0.120843	8.11806e-07	0.0367188
ENSG00000066379.10	ZNRD1	30026675	29739057	C	T	0.269058	rs885940	Primary	-0.789196	0.135327	5.48372e-09	0.000248034
ENSG00000066379.10	ZNRD1	30026675	29739272	T	C	0.269058	rs885939	Primary	-0.789196	0.135327	5.48372e-09	0.000248034
ENSG00000066379.10	ZNRD1	30026675	29739322	A	C	0.269058	rs885938	Primary	-0.789196	0.135327	5.48372e-09	0.000248034
ENSG00000066379.10	ZNRD1	30026675	29739434	A	C	0.269058	rs1610635	Primary	-0.789196	0.135327	5.48372e-09	0.000248034
ENSG00000066379.10	ZNRD1	30026675	29739639	T	C	0.269058	rs1610636	Primary	-0.789196	0.135327	5.48372e-09	0.000248034
ENSG00000066379.10	ZNRD1	30026675	29739906	T	G	0.269058	rs1610637	Primary	-0.789196	0.135327	5.48372e-09	0.000248034
ENSG00000066379.10	ZNRD1	30026675	29740166	A	C	0.288117	rs2844841	Primary	0.61394	0.125215	9.43338e-07	0.0426681
ENSG00000066379.10	ZNRD1	30026675	29741660	C	T	0.266816	rs1611275	Primary	-0.767116	0.135836	1.62918e-08	0.000736896
ENSG00000066379.10	ZNRD1	30026675	29742257	T	G	0.288117	rs2743945	Primary	0.61394	0.125215	9.43338e-07	0.0426681
ENSG00000066379.10	ZNRD1	30026675	29742846	G	A	0.269058	rs1419641	Primary	-0.789196	0.135327	5.48372e-09	0.000248034
ENSG00000066379.10	ZNRD1	30026675	29743400	A	T	0.303812	rs1633035	Primary	-0.646167	0.130975	8.07567e-07	0.0365271
ENSG00000066379.10	ZNRD1	30026675	29743517	A	G	0.0493274	rs9258305	Primary	-1.91871	0.247055	8.10463e-15	3.6658e-10
ENSG00000066379.10	ZNRD1	30026675	29743563	A	G	0.303812	rs1633034	Primary	-0.646167	0.130975	8.07567e-07	0.0365271
ENSG00000066379.10	ZNRD1	30026675	29743788	T	C	0.289238	rs1633033	Primary	-0.704115	0.131895	9.37534e-08	0.00424056
ENSG00000066379.10	ZNRD1	30026675	29744404	CAA	C	0.269058	.	Primary	-0.789196	0.135327	5.48372e-09	0.000248034
ENSG00000066379.10	ZNRD1	30026675	29744408	A	ACAT	0.267937	.	Primary	-0.774887	0.136187	1.27143e-08	0.000575081
ENSG00000066379.10	ZNRD1	30026675	29744411	A	T	0.269058	rs9258309	Primary	-0.789196	0.135327	5.48372e-09	0.000248034
ENSG00000066379.10	ZNRD1	30026675	29744412	C	A	0.269058	.	Primary	-0.789196	0.135327	5.48372e-09	0.000248034
ENSG00000066379.10	ZNRD1	30026675	29744419	T	C	0.289238	rs2844840	Primary	-0.704115	0.131895	9.37534e-08	0.00424056
ENSG00000066379.10	ZNRD1	30026675	29744609	T	C	0.289238	rs2844838	Primary	-0.704115	0.131895	9.37534e-08	0.00424056
ENSG00000066379.10	ZNRD1	30026675	29744610	G	C	0.269058	rs2844837	Primary	-0.789196	0.135327	5.48372e-09	0.000248034
ENSG00000066379.10	ZNRD1	30026675	29744623	T	A	0.288117	rs2975038	Primary	0.61394	0.125215	9.43338e-07	0.0426681
ENSG00000066379.10	ZNRD1	30026675	29744833	C	T	0.289238	rs1633032	Primary	-0.704115	0.131895	9.37534e-08	0.00424056
ENSG00000066379.10	ZNRD1	30026675	29745075	G	T	0.288117	rs2517930	Primary	0.61394	0.125215	9.43338e-07	0.0426681
ENSG00000066379.10	ZNRD1	30026675	29745175	A	G	0.288117	rs2517929	Primary	0.61394	0.125215	9.43338e-07	0.0426681
ENSG00000066379.10	ZNRD1	30026675	29745350	C	T	0.288117	rs2517928	Primary	0.61394	0.125215	9.43338e-07	0.0426681
ENSG00000066379.10	ZNRD1	30026675	29745351	G	C	0.303812	rs1618670	Primary	-0.646167	0.130975	8.07567e-07	0.0365271
ENSG00000066379.10	ZNRD1	30026675	29745439	A	G	0.570628	rs2394685	Primary	0.654751	0.117126	2.26905e-08	0.00102631
ENSG00000066379.10	ZNRD1	30026675	29745726	G	A	0.269058	rs1615962	Primary	-0.789196	0.135327	5.48372e-09	0.000248034
ENSG00000066379.10	ZNRD1	30026675	29745794	T	C	0.289238	rs1633030	Primary	-0.704115	0.131895	9.37534e-08	0.00424056
ENSG00000066379.10	ZNRD1	30026675	29745884	G	A	0.289238	rs1614309	Primary	-0.704115	0.131895	9.37534e-08	0.00424056
ENSG00000066379.10	ZNRD1	30026675	29746305	T	G	0.269058	rs1633029	Primary	-0.789196	0.135327	5.48372e-09	0.000248034
ENSG00000066379.10	ZNRD1	30026675	29746367	T	G	0.289238	rs1633028	Primary	-0.704115	0.131895	9.37534e-08	0.00424056
ENSG00000066379.10	ZNRD1	30026675	29746794	T	C	0.269058	rs1633023	Primary	-0.789196	0.135327	5.48372e-09	0.000248034
ENSG00000066379.10	ZNRD1	30026675	29746803	A	T	0.269058	rs1633022	Primary	-0.789196	0.135327	5.48372e-09	0.000248034
ENSG00000066379.10	ZNRD1	30026675	29747134	C	T	0.286996	rs1633020	Primary	-0.700319	0.133894	1.69145e-07	0.00765061
ENSG00000066379.10	ZNRD1	30026675	29747373	A	G	0.289238	rs2735042	Primary	-0.704115	0.131895	9.37534e-08	0.00424056
ENSG00000066379.10	ZNRD1	30026675	29747561	T	C	0.303812	rs1633019	Primary	-0.646167	0.130975	8.07567e-07	0.0365271
ENSG00000066379.10	ZNRD1	30026675	29747587	C	T	0.289238	rs1633018	Primary	-0.704115	0.131895	9.37534e-08	0.00424056
ENSG00000066379.10	ZNRD1	30026675	29747685	G	T	0.289238	rs1737020	Primary	-0.704115	0.131895	9.37534e-08	0.00424056
ENSG00000066379.10	ZNRD1	30026675	29747690	G	T	0.289238	rs1737019	Primary	-0.704115	0.131895	9.37534e-08	0.00424056
ENSG00000066379.10	ZNRD1	30026675	29748139	G	A	0.289238	rs144729306	Primary	-0.704115	0.131895	9.37534e-08	0.00424056
ENSG00000066379.10	ZNRD1	30026675	29748206	T	C	0.269058	rs144690858	Primary	-0.789196	0.135327	5.48372e-09	0.000248034
ENSG00000066379.10	ZNRD1	30026675	29748308	G	A	0.303812	rs139897235	Primary	-0.646167	0.130975	8.07567e-07	0.0365271
ENSG00000066379.10	ZNRD1	30026675	29748523	C	T	0.269058	rs138894902	Primary	-0.789196	0.135327	5.48372e-09	0.000248034
ENSG00000066379.10	ZNRD1	30026675	29748690	G	A	0.289238	rs146668923	Primary	-0.704115	0.131895	9.37534e-08	0.00424056
ENSG00000066379.10	ZNRD1	30026675	29748691	A	G	0.289238	rs140564206	Primary	-0.704115	0.131895	9.37534e-08	0.00424056
ENSG00000066379.10	ZNRD1	30026675	29749331	G	A	0.269058	rs148401298	Primary	-0.789196	0.135327	5.48372e-09	0.000248034
ENSG00000066379.10	ZNRD1	30026675	29752221	A	G	0.289238	rs148564564	Primary	-0.704115	0.131895	9.37534e-08	0.00424056
ENSG00000066379.10	ZNRD1	30026675	29752278	C	T	0.289238	rs138245928	Primary	-0.704115	0.131895	9.37534e-08	0.00424056
ENSG00000066379.10	ZNRD1	30026675	29753370	C	T	0.29148	rs9258382	Primary	-0.685985	0.13194	2.00145e-07	0.00905276
ENSG00000066379.10	ZNRD1	30026675	29753422	G	A	0.303812	rs1633016	Primary	-0.646167	0.130975	8.07567e-07	0.0365271
ENSG00000066379.10	ZNRD1	30026675	29753729	T	A	0.269058	rs1002044	Primary	-0.789196	0.135327	5.48372e-09	0.000248034
ENSG00000066379.10	ZNRD1	30026675	29753868	C	A	0.0459641	rs9258384	Primary	-1.87455	0.249775	6.15064e-14	2.78199e-09
ENSG00000066379.10	ZNRD1	30026675	29754016	C	T	0.266816	rs1002046	Primary	-0.787544	0.137481	1.01388e-08	0.00045859
ENSG00000066379.10	ZNRD1	30026675	29754357	C	T	0.280269	rs1737015	Primary	-0.728113	0.136421	9.43667e-08	0.0042683
ENSG00000066379.10	ZNRD1	30026675	29755760	T	C	0.288117	rs2743940	Primary	0.61394	0.125215	9.43338e-07	0.0426681
ENSG00000066379.10	ZNRD1	30026675	29756301	T	C	0.269058	rs1737013	Primary	-0.789196	0.135327	5.48372e-09	0.000248034
ENSG00000066379.10	ZNRD1	30026675	29756672	C	T	0.269058	rs1633015	Primary	-0.789196	0.135327	5.48372e-09	0.000248034
ENSG00000066379.10	ZNRD1	30026675	29757411	G	T	0.0493274	rs9258393	Primary	-1.91871	0.247055	8.10463e-15	3.6658e-10
ENSG00000066379.10	ZNRD1	30026675	29757608	T	C	0.303812	rs1633014	Primary	-0.646167	0.130975	8.07567e-07	0.0365271
ENSG00000066379.10	ZNRD1	30026675	29757715	C	T	0.288117	rs2735035	Primary	0.61394	0.125215	9.43338e-07	0.0426681
ENSG00000066379.10	ZNRD1	30026675	29758394	TTTC	T	0.283632	rs140204695	Primary	-0.72249	0.134121	7.17064e-08	0.00324335
ENSG00000066379.10	ZNRD1	30026675	29759310	G	A	0.269058	rs1610643	Primary	-0.789196	0.135327	5.48372e-09	0.000248034
ENSG00000066379.10	ZNRD1	30026675	29759445	C	T	0.269058	rs1610644	Primary	-0.789196	0.135327	5.48372e-09	0.000248034
ENSG00000066379.10	ZNRD1	30026675	29759885	G	A	0.269058	rs1611208	Primary	-0.789196	0.135327	5.48372e-09	0.000248034
ENSG00000066379.10	ZNRD1	30026675	29759923	T	C	0.269058	rs1611209	Primary	-0.789196	0.135327	5.48372e-09	0.000248034
ENSG00000066379.10	ZNRD1	30026675	29760523	C	T	0.269058	rs1611212	Primary	-0.789196	0.135327	5.48372e-09	0.000248034
ENSG00000066379.10	ZNRD1	30026675	29760819	A	C	0.289238	rs1610646	Primary	-0.685957	0.132091	2.06853e-07	0.00935617
ENSG00000066379.10	ZNRD1	30026675	29762303	C	T	0.288117	rs9357085	Primary	0.61394	0.125215	9.43338e-07	0.0426681
ENSG00000066379.10	ZNRD1	30026675	29762339	TA	T	0.269058	rs137861925	Primary	-0.789196	0.135327	5.48372e-09	0.000248034
ENSG00000066379.10	ZNRD1	30026675	29762340	A	*	0.257848	.	Primary	-0.70809	0.136942	2.33191e-07	0.0105475
ENSG00000066379.10	ZNRD1	30026675	29762389	CA	C	0.288117	rs28724922	Primary	0.61394	0.125215	9.43338e-07	0.0426681
ENSG00000066379.10	ZNRD1	30026675	29762693	C	T	0.269058	rs1633011	Primary	-0.789196	0.135327	5.48372e-09	0.000248034
ENSG00000066379.10	ZNRD1	30026675	29762903	G	A	0.266816	rs1737002	Primary	-0.779838	0.136794	1.19243e-08	0.000539347
ENSG00000066379.10	ZNRD1	30026675	29763087	A	T	0.269058	rs1633009	Primary	-0.789196	0.135327	5.48372e-09	0.000248034
ENSG00000066379.10	ZNRD1	30026675	29763762	G	A	0.289238	rs3129185	Primary	-0.704115	0.131895	9.37534e-08	0.00424056
ENSG00000066379.10	ZNRD1	30026675	29764363	C	T	0.269058	rs1633007	Primary	-0.789196	0.135327	5.48372e-09	0.000248034
ENSG00000066379.10	ZNRD1	30026675	29764374	A	T	0.269058	rs1633006	Primary	-0.789196	0.135327	5.48372e-09	0.000248034
ENSG00000066379.10	ZNRD1	30026675	29764548	A	G	0.266816	rs1737000	Primary	-0.779838	0.136794	1.19243e-08	0.000539347
ENSG00000066379.10	ZNRD1	30026675	29764656	G	A	0.284753	rs1736999	Primary	-0.705138	0.134972	1.74788e-07	0.00790582
ENSG00000066379.10	ZNRD1	30026675	29764663	T	C	0.267937	rs1633004	Primary	-0.778476	0.135991	1.03746e-08	0.000469251
ENSG00000066379.10	ZNRD1	30026675	29765001	G	A	0.266816	rs1630969	Primary	-0.779838	0.136794	1.19243e-08	0.000539347
ENSG00000066379.10	ZNRD1	30026675	29765047	A	T	0.267937	rs1633002	Primary	-0.778476	0.135991	1.03746e-08	0.000469251
ENSG00000066379.10	ZNRD1	30026675	29765270	C	T	0.285874	rs1633001	Primary	-0.697899	0.134022	1.9156e-07	0.00866445
ENSG00000066379.10	ZNRD1	30026675	29765271	G	A	0.307175	rs9366749	Primary	0.677875	0.125999	7.44916e-08	0.00336933
ENSG00000066379.10	ZNRD1	30026675	29765291	A	G	0.266816	rs1629068	Primary	-0.779838	0.136794	1.19243e-08	0.000539347
ENSG00000066379.10	ZNRD1	30026675	29766085	T	C	0.246637	rs1632999	Primary	-0.821797	0.154975	1.14064e-07	0.00515922
ENSG00000066379.10	ZNRD1	30026675	29766596	C	A	0.269058	rs1736994	Primary	-0.789196	0.135327	5.48372e-09	0.000248034
ENSG00000066379.10	ZNRD1	30026675	29766660	C	CAA	0.265695	.	Primary	-0.796973	0.138252	8.18309e-09	0.000370129
ENSG00000066379.10	ZNRD1	30026675	29766785	CAGAG	C	0.266816	.	Primary	-0.80214	0.136823	4.55596e-09	0.00020607
ENSG00000066379.10	ZNRD1	30026675	29766926	G	C	0.303812	rs1736991	Primary	-0.646167	0.130975	8.07567e-07	0.0365271
ENSG00000066379.10	ZNRD1	30026675	29766969	G	A	0.283632	rs28514417	Primary	-0.72249	0.134121	7.17064e-08	0.00324335
ENSG00000066379.10	ZNRD1	30026675	29767088	C	CA	0.282511	rs9280706	Primary	-0.728606	0.13406	5.48238e-08	0.00247974
ENSG00000066379.10	ZNRD1	30026675	29767202	CCACTG	C	0.283632	rs368620511	Primary	-0.72093	0.132993	5.9328e-08	0.00268346
ENSG00000066379.10	ZNRD1	30026675	29767388	C	T	0.283632	rs1632997	Primary	-0.72249	0.134121	7.17064e-08	0.00324335
ENSG00000066379.10	ZNRD1	30026675	29767880	G	A	0.283632	rs1736986	Primary	-0.72249	0.134121	7.17064e-08	0.00324335
ENSG00000066379.10	ZNRD1	30026675	29767941	A	G	0.267937	rs1736985	Primary	-0.778476	0.135991	1.03746e-08	0.000469251
ENSG00000066379.10	ZNRD1	30026675	29768049	G	A	0.269058	rs1736983	Primary	-0.789196	0.135327	5.48372e-09	0.000248034
ENSG00000066379.10	ZNRD1	30026675	29768123	C	A	0.0493274	rs7741100	Primary	-1.91871	0.247055	8.10463e-15	3.6658e-10
ENSG00000066379.10	ZNRD1	30026675	29768344	T	C	0.415919	rs1611185	Primary	0.731506	0.114524	1.68771e-10	7.63368e-06
ENSG00000066379.10	ZNRD1	30026675	29768425	GAGA	G	0.282511	.	Primary	-0.722708	0.134837	8.32879e-08	0.0037672
ENSG00000066379.10	ZNRD1	30026675	29768436	G	T	0.267937	rs1610708	Primary	-0.790252	0.136088	6.36324e-09	0.000287816
ENSG00000066379.10	ZNRD1	30026675	29768471	C	T	0.28139	rs1610709	Primary	-0.739278	0.135779	5.18863e-08	0.00234687
ENSG00000066379.10	ZNRD1	30026675	29768515	AG	A	0.267937	rs11344221	Primary	-0.790252	0.136088	6.36324e-09	0.000287816
ENSG00000066379.10	ZNRD1	30026675	29768780	T	C	0.298206	rs1610648	Primary	-0.659378	0.134856	1.01096e-06	0.0457266
ENSG00000066379.10	ZNRD1	30026675	29769280	C	T	0.30157	rs1610653	Primary	-0.632385	0.131955	1.6478e-06	0.0745315
ENSG00000066379.10	ZNRD1	30026675	29769332	G	A	0.269058	rs1610710	Primary	-0.789196	0.135327	5.48372e-09	0.000248034
ENSG00000066379.10	ZNRD1	30026675	29769497	A	C	0.269058	rs1610711	Primary	-0.789196	0.135327	5.48372e-09	0.000248034
ENSG00000066379.10	ZNRD1	30026675	29769701	C	A	0.0459641	rs9258441	Primary	-1.87455	0.249775	6.15064e-14	2.78199e-09
ENSG00000066379.10	ZNRD1	30026675	29769717	T	C	0.306054	rs1610713	Primary	-0.628853	0.131052	1.59853e-06	0.072303
ENSG00000066379.10	ZNRD1	30026675	29769829	T	C	0.269058	rs1610714	Primary	-0.789196	0.135327	5.48372e-09	0.000248034
ENSG00000066379.10	ZNRD1	30026675	29769907	C	T	0.269058	rs1610654	Primary	-0.789196	0.135327	5.48372e-09	0.000248034
ENSG00000066379.10	ZNRD1	30026675	29770187	A	C	0.267937	rs1610655	Primary	-0.778476	0.135991	1.03746e-08	0.000469251
ENSG00000066379.10	ZNRD1	30026675	29770451	G	A	0.269058	rs1610715	Primary	-0.789196	0.135327	5.48372e-09	0.000248034
ENSG00000066379.10	ZNRD1	30026675	29771080	G	A	0.269058	rs1610658	Primary	-0.789196	0.135327	5.48372e-09	0.000248034
ENSG00000066379.10	ZNRD1	30026675	29771298	A	T	0.316143	rs1611190	Primary	0.596058	0.120843	8.11806e-07	0.0367188
ENSG00000066379.10	ZNRD1	30026675	29771421	G	A	0.269058	rs1610659	Primary	-0.789196	0.135327	5.48372e-09	0.000248034
ENSG00000066379.10	ZNRD1	30026675	29771654	A	G	0.269058	rs1610661	Primary	-0.789196	0.135327	5.48372e-09	0.000248034
ENSG00000066379.10	ZNRD1	30026675	29771806	C	G	0.269058	rs1611191	Primary	-0.789196	0.135327	5.48372e-09	0.000248034
ENSG00000066379.10	ZNRD1	30026675	29772059	A	G	0.266816	rs1611195	Primary	-0.779838	0.136794	1.19243e-08	0.000539347
ENSG00000066379.10	ZNRD1	30026675	29772098	C	T	0.285874	rs2394688	Primary	0.613644	0.126646	1.26391e-06	0.057168
ENSG00000066379.10	ZNRD1	30026675	29772395	G	A	0.266816	rs1632988	Primary	-0.779838	0.136794	1.19243e-08	0.000539347
ENSG00000066379.10	ZNRD1	30026675	29772549	C	G	0.269058	rs1632987	Primary	-0.789196	0.135327	5.48372e-09	0.000248034
ENSG00000066379.10	ZNRD1	30026675	29773158	C	T	0.288117	rs2394173	Primary	0.61394	0.125215	9.43338e-07	0.0426681
ENSG00000066379.10	ZNRD1	30026675	29773509	C	T	0.303812	rs1632983	Primary	-0.646167	0.130975	8.07567e-07	0.0365271
ENSG00000066379.10	ZNRD1	30026675	29773720	T	C	0.284753	rs1632980	Primary	-0.705138	0.134972	1.74788e-07	0.00790582
ENSG00000066379.10	ZNRD1	30026675	29773954	T	C	0.269058	rs1624302	Primary	-0.789196	0.135327	5.48372e-09	0.000248034
ENSG00000066379.10	ZNRD1	30026675	29774506	TTTC	T	0.0426009	rs370670922	Primary	-1.83727	0.261169	1.99563e-12	9.02642e-08
ENSG00000066379.10	ZNRD1	30026675	29774620	G	A	0.269058	rs2248870	Primary	-0.789196	0.135327	5.48372e-09	0.000248034
ENSG00000066379.10	ZNRD1	30026675	29774627	G	A	0.269058	rs2248871	Primary	-0.789196	0.135327	5.48372e-09	0.000248034
ENSG00000066379.10	ZNRD1	30026675	29774709	C	T	0.269058	rs9258448	Primary	-0.789196	0.135327	5.48372e-09	0.000248034
ENSG00000066379.10	ZNRD1	30026675	29774761	A	C	0.269058	rs2523410	Primary	-0.789196	0.135327	5.48372e-09	0.000248034
ENSG00000066379.10	ZNRD1	30026675	29774959	T	C	0.269058	rs1632979	Primary	-0.789196	0.135327	5.48372e-09	0.000248034
ENSG00000066379.10	ZNRD1	30026675	29774989	T	A	0.269058	rs1736975	Primary	-0.789196	0.135327	5.48372e-09	0.000248034
ENSG00000066379.10	ZNRD1	30026675	29775237	A	T	0.269058	rs1736974	Primary	-0.789196	0.135327	5.48372e-09	0.000248034
ENSG00000066379.10	ZNRD1	30026675	29775346	A	G	0.269058	rs1736973	Primary	-0.789196	0.135327	5.48372e-09	0.000248034
ENSG00000066379.10	ZNRD1	30026675	29775662	A	G	0.328475	rs2523409	Primary	0.619315	0.122437	4.23157e-07	0.0191398
ENSG00000066379.10	ZNRD1	30026675	29775950	A	C	0.313901	rs2735030	Primary	0.594113	0.122019	1.12143e-06	0.0507233
ENSG00000066379.10	ZNRD1	30026675	29776087	T	C	0.0493274	rs9258451	Primary	-1.91871	0.247055	8.10463e-15	3.6658e-10
ENSG00000066379.10	ZNRD1	30026675	29776152	A	C	0.269058	rs1736972	Primary	-0.789196	0.135327	5.48372e-09	0.000248034
ENSG00000066379.10	ZNRD1	30026675	29776239	T	C	0.2713	rs1632976	Primary	-0.759592	0.134203	1.51348e-08	0.000684561
ENSG00000066379.10	ZNRD1	30026675	29776322	G	T	0.269058	rs1736971	Primary	-0.789196	0.135327	5.48372e-09	0.000248034
ENSG00000066379.10	ZNRD1	30026675	29776390	A	T	0.269058	rs1736969	Primary	-0.789196	0.135327	5.48372e-09	0.000248034
ENSG00000066379.10	ZNRD1	30026675	29776715	A	G	0.267937	rs1736968	Primary	-0.7947	0.135144	4.09254e-09	0.00018511
ENSG00000066379.10	ZNRD1	30026675	29776878	G	A	0.269058	rs1736967	Primary	-0.789196	0.135327	5.48372e-09	0.000248034
ENSG00000066379.10	ZNRD1	30026675	29777146	GA	G	0.269058	rs35462222	Primary	-0.789196	0.135327	5.48372e-09	0.000248034
ENSG00000066379.10	ZNRD1	30026675	29777394	A	G	0.269058	rs1736966	Primary	-0.789196	0.135327	5.48372e-09	0.000248034
ENSG00000066379.10	ZNRD1	30026675	29777585	C	A	0.266816	rs2735029	Primary	-0.787544	0.137481	1.01388e-08	0.00045859
ENSG00000066379.10	ZNRD1	30026675	29777624	AACTC	A	0.269058	.	Primary	-0.789196	0.135327	5.48372e-09	0.000248034
ENSG00000066379.10	ZNRD1	30026675	29777684	C	CAA	0.288117	.	Primary	0.61394	0.125215	9.43338e-07	0.0426681
ENSG00000066379.10	ZNRD1	30026675	29777892	G	A	0.266816	rs1736964	Primary	-0.779838	0.136794	1.19243e-08	0.000539347
ENSG00000066379.10	ZNRD1	30026675	29777983	G	A	0.269058	rs1736963	Primary	-0.789196	0.135327	5.48372e-09	0.000248034
ENSG00000066379.10	ZNRD1	30026675	29778171	T	G	0.267937	rs2517920	Primary	-0.778476	0.135991	1.03746e-08	0.000469251
ENSG00000066379.10	ZNRD1	30026675	29778174	T	C	0.267937	rs2517919	Primary	-0.778476	0.135991	1.03746e-08	0.000469251
ENSG00000066379.10	ZNRD1	30026675	29778213	C	G	0.272422	rs1611172	Primary	-0.711928	0.135923	1.62578e-07	0.00735357
ENSG00000066379.10	ZNRD1	30026675	29778240	T	C	0.315022	rs1611173	Primary	0.585002	0.121565	1.49231e-06	0.0674989
ENSG00000066379.10	ZNRD1	30026675	29778318	A	G	0.269058	rs1611175	Primary	-0.789196	0.135327	5.48372e-09	0.000248034
ENSG00000066379.10	ZNRD1	30026675	29778419	T	C	0.269058	rs1610697	Primary	-0.789196	0.135327	5.48372e-09	0.000248034
ENSG00000066379.10	ZNRD1	30026675	29778607	T	C	0.266816	rs1610662	Primary	-0.779838	0.136794	1.19243e-08	0.000539347
ENSG00000066379.10	ZNRD1	30026675	29778898	T	C	0.270179	rs1610698	Primary	-0.783883	0.134902	6.21942e-09	0.000281311
ENSG00000066379.10	ZNRD1	30026675	29778957	CTG	C	0.266816	.	Primary	-0.787544	0.137481	1.01388e-08	0.00045859
ENSG00000066379.10	ZNRD1	30026675	29779203	G	A	0.266816	rs1610665	Primary	-0.779838	0.136794	1.19243e-08	0.000539347
ENSG00000066379.10	ZNRD1	30026675	29779806	C	T	0.267937	rs1610666	Primary	-0.778476	0.135991	1.03746e-08	0.000469251
ENSG00000066379.10	ZNRD1	30026675	29780328	C	T	0.0493274	rs9258467	Primary	-1.91871	0.247055	8.10463e-15	3.6658e-10
ENSG00000066379.10	ZNRD1	30026675	29780529	C	T	0.269058	rs753544	Primary	-0.789196	0.135327	5.48372e-09	0.000248034
ENSG00000066379.10	ZNRD1	30026675	29781011	T	A	0.316143	rs2743936	Primary	0.596058	0.120843	8.11806e-07	0.0367188
ENSG00000066379.10	ZNRD1	30026675	29781521	G	T	0.219731	rs1610702	Primary	-1.0129	0.145701	3.6029e-12	1.62963e-07
ENSG00000066379.10	ZNRD1	30026675	29781582	G	A	0.266816	rs1611184	Primary	-0.779838	0.136794	1.19243e-08	0.000539347
ENSG00000066379.10	ZNRD1	30026675	29781703	T	C	0.266816	rs1610673	Primary	-0.779838	0.136794	1.19243e-08	0.000539347
ENSG00000066379.10	ZNRD1	30026675	29781886	C	T	0.266816	rs1610674	Primary	-0.779838	0.136794	1.19243e-08	0.000539347
ENSG00000066379.10	ZNRD1	30026675	29781987	A	C	0.266816	rs1610704	Primary	-0.779838	0.136794	1.19243e-08	0.000539347
ENSG00000066379.10	ZNRD1	30026675	29782470	C	T	0.267937	rs1736959	Primary	-0.778476	0.135991	1.03746e-08	0.000469251
ENSG00000066379.10	ZNRD1	30026675	29782533	G	A	0.267937	rs1736958	Primary	-0.778476	0.135991	1.03746e-08	0.000469251
ENSG00000066379.10	ZNRD1	30026675	29782633	T	C	0.295964	rs1736957	Primary	-0.675539	0.130353	2.19085e-07	0.00990943
ENSG00000066379.10	ZNRD1	30026675	29783064	G	A	0.266816	rs1077433	Primary	-0.779838	0.136794	1.19243e-08	0.000539347
ENSG00000066379.10	ZNRD1	30026675	29783529	G	A	0.269058	rs1111673	Primary	-0.789196	0.135327	5.48372e-09	0.000248034
ENSG00000066379.10	ZNRD1	30026675	29783660	C	T	0.269058	rs1079599	Primary	-0.789196	0.135327	5.48372e-09	0.000248034
ENSG00000066379.10	ZNRD1	30026675	29784503	A	G	0.285874	rs6457057	Primary	0.613644	0.126646	1.26391e-06	0.057168
ENSG00000066379.10	ZNRD1	30026675	29784556	C	A	0.0302691	rs9258471	Primary	-1.75469	0.322217	5.16083e-08	0.0023343
ENSG00000066379.10	ZNRD1	30026675	29784693	C	T	0.288117	rs6457058	Primary	0.61394	0.125215	9.43338e-07	0.0426681
ENSG00000066379.10	ZNRD1	30026675	29785101	G	A	0.288117	rs7776026	Primary	0.61394	0.125215	9.43338e-07	0.0426681
ENSG00000066379.10	ZNRD1	30026675	29785149	A	C	0.269058	rs1620173	Primary	-0.789196	0.135327	5.48372e-09	0.000248034
ENSG00000066379.10	ZNRD1	30026675	29786005	C	T	0.295964	rs1736950	Primary	-0.788743	0.125829	3.64883e-10	1.6504e-05
ENSG00000066379.10	ZNRD1	30026675	29786420	C	T	0.295964	rs1736948	Primary	-0.788743	0.125829	3.64883e-10	1.6504e-05
ENSG00000066379.10	ZNRD1	30026675	29786644	A	G	0.295964	rs1633047	Primary	-0.788743	0.125829	3.64883e-10	1.6504e-05
ENSG00000066379.10	ZNRD1	30026675	29787202	G	A	0.288117	rs6911139	Primary	0.61394	0.125215	9.43338e-07	0.0426681
ENSG00000066379.10	ZNRD1	30026675	29787300	G	T	0.295964	rs1633039	Primary	-0.788743	0.125829	3.64883e-10	1.6504e-05
ENSG00000066379.10	ZNRD1	30026675	29787976	T	G	0.316143	rs2743930	Primary	0.596058	0.120843	8.11806e-07	0.0367188
ENSG00000066379.10	ZNRD1	30026675	29788392	A	G	0.295964	rs1155143	Primary	-0.788743	0.125829	3.64883e-10	1.6504e-05
ENSG00000066379.10	ZNRD1	30026675	29788606	C	T	0.295964	rs1610675	Primary	-0.788743	0.125829	3.64883e-10	1.6504e-05
ENSG00000066379.10	ZNRD1	30026675	29790880	A	G	0.300448	rs1611155	Primary	-0.782624	0.125245	4.13734e-10	1.87136e-05
ENSG00000066379.10	ZNRD1	30026675	29790905	G	A	0.316143	rs1611156	Primary	0.596058	0.120843	8.11806e-07	0.0367188
ENSG00000066379.10	ZNRD1	30026675	29791033	C	T	0.288117	rs6934957	Primary	0.61394	0.125215	9.43338e-07	0.0426681
ENSG00000066379.10	ZNRD1	30026675	29791542	A	G	0.300448	rs1611158	Primary	-0.782624	0.125245	4.13734e-10	1.87136e-05
ENSG00000066379.10	ZNRD1	30026675	29791561	A	C	0.295964	rs1611159	Primary	-0.788743	0.125829	3.64883e-10	1.6504e-05
ENSG00000066379.10	ZNRD1	30026675	29791945	T	C	0.300448	rs1611162	Primary	-0.782624	0.125245	4.13734e-10	1.87136e-05
ENSG00000066379.10	ZNRD1	30026675	29792575	A	G	0.501121	rs2249571	Primary	-0.54684	0.11522	2.07427e-06	0.0938212
ENSG00000066379.10	ZNRD1	30026675	29793021	A	G	0.295964	rs1736942	Primary	-0.784341	0.127451	7.55304e-10	3.41632e-05
ENSG00000066379.10	ZNRD1	30026675	29795747	G	C	0.288117	rs6932888	Primary	0.61394	0.125215	9.43338e-07	0.0426681
ENSG00000066379.10	ZNRD1	30026675	29795751	C	T	0.288117	rs6932596	Primary	0.61394	0.125215	9.43338e-07	0.0426681
ENSG00000066379.10	ZNRD1	30026675	29795809	C	T	0.429372	rs1628628	Primary	-0.711712	0.118649	1.99156e-09	9.00801e-05
ENSG00000066379.10	ZNRD1	30026675	29796126	A	AC	0.526906	rs3215482	Primary	-0.562102	0.115867	1.2268e-06	0.0554895
ENSG00000066379.10	ZNRD1	30026675	29796152	G	C	0.526906	rs1625907	Primary	-0.562102	0.115867	1.2268e-06	0.0554895
ENSG00000066379.10	ZNRD1	30026675	29796327	C	T	0.298206	rs1130356	Primary	-0.781649	0.126358	6.17095e-10	2.79118e-05
ENSG00000066379.10	ZNRD1	30026675	29797639	C	T	0.2713	rs1049033	Primary	-0.780405	0.135901	9.33229e-09	0.000422109
ENSG00000066379.10	ZNRD1	30026675	29797782	T	C	0.429372	rs1611627	Primary	-0.711712	0.118649	1.99156e-09	9.00801e-05
ENSG00000066379.10	ZNRD1	30026675	29798419	G	A	0.2713	rs915670	Primary	-0.780405	0.135901	9.33229e-09	0.000422109
ENSG00000066379.10	ZNRD1	30026675	29798794	A	G	0.28139	rs9380142	Primary	0.641598	0.125325	3.06387e-07	0.0138582
ENSG00000066379.10	ZNRD1	30026675	29798803	C	G	0.298206	rs1610696	Primary	-0.781649	0.126358	6.17095e-10	2.79118e-05
ENSG00000066379.10	ZNRD1	30026675	29799116	G	T	0.298206	rs1611139	Primary	-0.781649	0.126358	6.17095e-10	2.79118e-05
ENSG00000066379.10	ZNRD1	30026675	29799316	C	T	0.2713	rs1611143	Primary	-0.780405	0.135901	9.33229e-09	0.000422109
ENSG00000066379.10	ZNRD1	30026675	29799354	A	G	0.53139	rs1611144	Primary	-0.561518	0.115631	1.19715e-06	0.0541481
ENSG00000066379.10	ZNRD1	30026675	29799942	TA	T	0.273543	rs28724925	Primary	0.633424	0.126984	6.09341e-07	0.0275611
ENSG00000066379.10	ZNRD1	30026675	29801324	T	C	0.219731	rs1610682	Primary	-1.0129	0.145701	3.6029e-12	1.62963e-07
ENSG00000066379.10	ZNRD1	30026675	29803377	C	T	0.044843	rs9258508	Primary	-1.90066	0.252802	5.55112e-14	2.51082e-09
ENSG00000066379.10	ZNRD1	30026675	29803880	A	G	0.272422	rs9295821	Primary	0.646712	0.127088	3.60556e-07	0.0163083
ENSG00000066379.10	ZNRD1	30026675	29804165	G	A	0.441704	rs9404952	Primary	0.566069	0.108181	1.67114e-07	0.00755872
ENSG00000066379.10	ZNRD1	30026675	29806341	T	C	0.0482063	rs9258525	Primary	-1.94601	0.250004	6.99441e-15	3.16364e-10
ENSG00000066379.10	ZNRD1	30026675	29806786	A	T	0.299327	.	Primary	0.589058	0.121218	1.17685e-06	0.0532301
ENSG00000066379.10	ZNRD1	30026675	29806901	C	G	0.65583	rs407238	Primary	0.832272	0.117155	1.21203e-12	5.48214e-08
ENSG00000066379.10	ZNRD1	30026675	29809382	C	T	0.219731	rs1611133	Primary	-1.0129	0.145701	3.6029e-12	1.62963e-07
ENSG00000066379.10	ZNRD1	30026675	29809826	A	C	0.219731	rs1476435	Primary	-1.0129	0.145701	3.6029e-12	1.62963e-07
ENSG00000066379.10	ZNRD1	30026675	29811131	G	A	0.221973	rs1611136	Primary	-1.0116	0.143234	1.6348e-12	7.39438e-08
ENSG00000066379.10	ZNRD1	30026675	29813380	C	T	0.221973	rs2517878	Primary	-1.0116	0.143234	1.6348e-12	7.39438e-08
ENSG00000066379.10	ZNRD1	30026675	29814778	T	G	0.219731	rs1611750	Primary	-1.00395	0.143545	2.67186e-12	1.20851e-07
ENSG00000066379.10	ZNRD1	30026675	29817106	T	A	0.615471	rs2523765	Primary	0.626556	0.119586	1.61121e-07	0.00728766
ENSG00000066379.10	ZNRD1	30026675	29818123	G	A	0.300448	rs2523763	Primary	0.620225	0.122071	3.75712e-07	0.0169938
ENSG00000066379.10	ZNRD1	30026675	29818159	C	T	0.272422	rs4711200	Primary	0.646712	0.127088	3.60556e-07	0.0163083
ENSG00000066379.10	ZNRD1	30026675	29818229	C	G	0.299327	rs2734987	Primary	0.617295	0.12191	4.11599e-07	0.0186171
ENSG00000066379.10	ZNRD1	30026675	29820047	T	C	0.0751121	rs2508050	Primary	-1.19481	0.207284	8.20894e-09	0.000371299
ENSG00000066379.10	ZNRD1	30026675	29820110	G	A	0.044843	rs9258605	Primary	-1.90066	0.252802	5.55112e-14	2.51082e-09
ENSG00000066379.10	ZNRD1	30026675	29820278	A	G	0.300448	rs3115627	Primary	0.620225	0.122071	3.75712e-07	0.0169938
ENSG00000066379.10	ZNRD1	30026675	29820503	G	A	0.0482063	rs9258618	Primary	-1.94601	0.250004	6.99441e-15	3.16364e-10
ENSG00000066379.10	ZNRD1	30026675	29821268	G	A	0.299327	rs3094643	Primary	0.617295	0.12191	4.11599e-07	0.0186171
ENSG00000066379.10	ZNRD1	30026675	29821567	G	T	0.272422	rs2734982	Primary	0.646712	0.127088	3.60556e-07	0.0163083
ENSG00000066379.10	ZNRD1	30026675	29822061	C	T	0.827354	rs3115626	Primary	0.867822	0.144514	1.91194e-09	8.64791e-05
ENSG00000066379.10	ZNRD1	30026675	29822139	G	A	0.272422	rs2975034	Primary	0.646712	0.127088	3.60556e-07	0.0163083
ENSG00000066379.10	ZNRD1	30026675	29822261	G	A	0.267937	rs2975033	Primary	0.640088	0.127021	4.67451e-07	0.0211433
ENSG00000066379.10	ZNRD1	30026675	29822413	A	C	0.272422	rs2905756	Primary	0.646712	0.127088	3.60556e-07	0.0163083
ENSG00000066379.10	ZNRD1	30026675	29822650	A	G	0.827354	rs3115625	Primary	0.867822	0.144514	1.91194e-09	8.64791e-05
ENSG00000066379.10	ZNRD1	30026675	29822779	AAAAC	A	0.603139	rs147955672	Primary	0.627571	0.113731	3.42797e-08	0.00155051
ENSG00000066379.10	ZNRD1	30026675	29823571	A	T	0.827354	rs3128909	Primary	0.867822	0.144514	1.91194e-09	8.64791e-05
ENSG00000066379.10	ZNRD1	30026675	29824731	G	A	0.0369955	rs9258701	Primary	-1.90003	0.28729	3.75034e-11	1.69632e-06
ENSG00000066379.10	ZNRD1	30026675	29825566	A	G	0.300448	rs1611680	Primary	0.620225	0.122071	3.75712e-07	0.0169938
ENSG00000066379.10	ZNRD1	30026675	29826092	C	T	0.272422	rs2517840	Primary	0.646712	0.127088	3.60556e-07	0.0163083
ENSG00000066379.10	ZNRD1	30026675	29827002	A	G	0.044843	rs9258734	Primary	-1.90066	0.252802	5.55112e-14	2.51082e-09
ENSG00000066379.10	ZNRD1	30026675	29828051	A	G	0.299327	rs1611702	Primary	0.617295	0.12191	4.11599e-07	0.0186171
ENSG00000066379.10	ZNRD1	30026675	29828270	T	C	0.0504484	rs9258741	Primary	-1.85329	0.238508	7.77156e-15	3.51515e-10
ENSG00000066379.10	ZNRD1	30026675	29828276	C	T	0.044843	rs9258742	Primary	-1.90066	0.252802	5.55112e-14	2.51082e-09
ENSG00000066379.10	ZNRD1	30026675	29828467	C	T	0.299327	rs1611704	Primary	0.617295	0.12191	4.11599e-07	0.0186171
ENSG00000066379.10	ZNRD1	30026675	29828660	A	G	0.272422	rs2523822	Primary	0.646712	0.127088	3.60556e-07	0.0163083
ENSG00000066379.10	ZNRD1	30026675	29829464	C	T	0.044843	rs9258755	Primary	-1.90066	0.252802	5.55112e-14	2.51082e-09
ENSG00000066379.10	ZNRD1	30026675	29829482	A	C	0.300448	rs1611715	Primary	0.598891	0.122193	9.52637e-07	0.0430887
ENSG00000066379.10	ZNRD1	30026675	29829986	T	C	0.827354	rs3094169	Primary	0.867822	0.144514	1.91194e-09	8.64791e-05
ENSG00000066379.10	ZNRD1	30026675	29830529	C	G	0.0751121	rs2517829	Primary	-1.19481	0.207284	8.20894e-09	0.000371299
ENSG00000066379.10	ZNRD1	30026675	29832724	C	T	0.273543	.	Primary	0.626143	0.127361	8.82049e-07	0.0398959
ENSG00000066379.10	ZNRD1	30026675	29832908	A	G	0.0751121	rs2975032	Primary	-1.19481	0.207284	8.20894e-09	0.000371299
ENSG00000066379.10	ZNRD1	30026675	29833794	T	TA	0.109865	rs79096800	Primary	-0.981781	0.173535	1.53574e-08	0.000694632
ENSG00000066379.10	ZNRD1	30026675	29833948	C	T	0.109865	rs2734973	Primary	-0.981781	0.173535	1.53574e-08	0.000694632
ENSG00000066379.10	ZNRD1	30026675	29834199	T	C	0.273543	rs2734972	Primary	0.626143	0.127361	8.82049e-07	0.0398959
ENSG00000066379.10	ZNRD1	30026675	29835026	G	A	0.280269	rs2734968	Primary	0.632237	0.128447	8.55918e-07	0.038714
ENSG00000066379.10	ZNRD1	30026675	29835518	T	A	0.280269	rs2734967	Primary	0.632237	0.128447	8.55918e-07	0.038714
ENSG00000066379.10	ZNRD1	30026675	29836524	C	A	0.0504484	rs9258866	Primary	-1.85329	0.238508	7.77156e-15	3.51515e-10
ENSG00000066379.10	ZNRD1	30026675	29836732	G	A	0.0504484	rs9258869	Primary	-1.85329	0.238508	7.77156e-15	3.51515e-10
ENSG00000066379.10	ZNRD1	30026675	29836968	A	G	0.0504484	rs9258874	Primary	-1.85329	0.238508	7.77156e-15	3.51515e-10
ENSG00000066379.10	ZNRD1	30026675	29837072	G	A	0.0504484	rs9258876	Primary	-1.85329	0.238508	7.77156e-15	3.51515e-10
ENSG00000066379.10	ZNRD1	30026675	29837138	A	C	0.0482063	.	Primary	-1.94601	0.250004	6.99441e-15	3.16364e-10
ENSG00000066379.10	ZNRD1	30026675	29839268	C	T	0.0751121	rs886398	Primary	-1.19481	0.207284	8.20894e-09	0.000371299
ENSG00000066379.10	ZNRD1	30026675	29840146	T	C	0.109865	rs1611646	Primary	-0.981781	0.173535	1.53574e-08	0.000694632
ENSG00000066379.10	ZNRD1	30026675	29841072	C	T	0.109865	rs1611650	Primary	-0.981781	0.173535	1.53574e-08	0.000694632
ENSG00000066379.10	ZNRD1	30026675	29841191	TCCG	T	0.0751121	.	Primary	-1.19481	0.207284	8.20894e-09	0.000371299
ENSG00000066379.10	ZNRD1	30026675	29841196	T	TGGC	0.0751121	.	Primary	-1.19481	0.207284	8.20894e-09	0.000371299
ENSG00000066379.10	ZNRD1	30026675	29841483	G	C	0.109865	rs1611652	Primary	-0.981781	0.173535	1.53574e-08	0.000694632
ENSG00000066379.10	ZNRD1	30026675	29841505	T	A	0.109865	rs80311704	Primary	-0.981781	0.173535	1.53574e-08	0.000694632
ENSG00000066379.10	ZNRD1	30026675	29841926	T	G	0.0751121	rs1611655	Primary	-1.19481	0.207284	8.20894e-09	0.000371299
ENSG00000066379.10	ZNRD1	30026675	29841990	T	G	0.280269	rs2734966	Primary	0.632237	0.128447	8.55918e-07	0.038714
ENSG00000066379.10	ZNRD1	30026675	29842409	T	C	0.280269	rs2523812	Primary	0.632237	0.128447	8.55918e-07	0.038714
ENSG00000066379.10	ZNRD1	30026675	29842934	TC	T	0.0482063	rs9278382	Primary	-1.94601	0.250004	6.99441e-15	3.16364e-10
ENSG00000066379.10	ZNRD1	30026675	29849619	G	T	0.109865	rs2523809	Primary	-0.981781	0.173535	1.53574e-08	0.000694632
ENSG00000066379.10	ZNRD1	30026675	29849674	T	C	0.273543	rs2734960	Primary	0.626143	0.127361	8.82049e-07	0.0398959
ENSG00000066379.10	ZNRD1	30026675	29850183	G	A	0.109865	rs2734958	Primary	-0.981781	0.173535	1.53574e-08	0.000694632
ENSG00000066379.10	ZNRD1	30026675	29850274	A	G	0.073991	rs2523807	Primary	-1.16036	0.209064	2.85261e-08	0.00129026
ENSG00000066379.10	ZNRD1	30026675	29850335	C	T	0.273543	rs2523806	Primary	0.626143	0.127361	8.82049e-07	0.0398959
ENSG00000066379.10	ZNRD1	30026675	29852104	TTCTC	T	0.0549327	rs147144172	Primary	-1.60988	0.208548	1.16573e-14	5.27273e-10
ENSG00000066379.10	ZNRD1	30026675	29854722	A	G	0.0549327	rs9259204	Primary	-1.61283	0.208671	1.08802e-14	4.92122e-10
ENSG00000066379.10	ZNRD1	30026675	29854795	G	C	0.32287	rs1054175	Primary	0.523649	0.108303	1.33114e-06	0.0602088
ENSG00000066379.10	ZNRD1	30026675	29855978	G	T	0.0571749	rs7768484	Primary	-1.57246	0.20041	4.32987e-15	1.95844e-10
ENSG00000066379.10	ZNRD1	30026675	29856151	CG	C	0.0571749	rs9278394	Primary	-1.56679	0.201887	8.43769e-15	3.81645e-10
ENSG00000066379.10	ZNRD1	30026675	29856330	G	A	0.328475	rs2428512	Primary	0.527242	0.109851	1.58958e-06	0.0718983
ENSG00000066379.10	ZNRD1	30026675	29859906	T	C	0.33296	rs2517816	Primary	0.535934	0.107499	6.18162e-07	0.0279601
ENSG00000066379.10	ZNRD1	30026675	29860505	G	A	0.0560538	rs9259319	Primary	-1.59574	0.207705	1.55431e-14	7.03031e-10
ENSG00000066379.10	ZNRD1	30026675	29861567	T	C	0.0571749	.	Primary	-1.56389	0.201769	9.10383e-15	4.11775e-10
ENSG00000066379.10	ZNRD1	30026675	29862227	G	A	0.331839	rs74617756	Primary	0.534348	0.107128	6.10339e-07	0.0276062
ENSG00000066379.10	ZNRD1	30026675	29864686	C	T	0.0549327	rs9259449	Primary	-1.61761	0.213766	3.80806e-14	1.72243e-09
ENSG00000066379.10	ZNRD1	30026675	29865718	C	A	0.325112	rs2517811	Primary	0.510327	0.107718	2.16252e-06	0.0978129
ENSG00000066379.10	ZNRD1	30026675	29865737	G	C	0.0538117	rs9259469	Primary	-1.65386	0.217769	3.08642e-14	1.39602e-09
ENSG00000066379.10	ZNRD1	30026675	29866219	A	G	0.353139	rs2523830	Primary	-0.6789	0.110584	8.29371e-10	3.75133e-05
ENSG00000066379.10	ZNRD1	30026675	29866227	A	G	0.0571749	rs9259477	Primary	-1.56389	0.201769	9.10383e-15	4.11775e-10
ENSG00000066379.10	ZNRD1	30026675	29869110	T	C	0.0414798	rs4123016	Primary	-1.61367	0.244593	4.18494e-11	1.89289e-06
ENSG00000066379.10	ZNRD1	30026675	29869950	C	T	0.0571749	rs9259529	Primary	-1.56389	0.201769	9.10383e-15	4.11775e-10
ENSG00000066379.10	ZNRD1	30026675	29870053	G	A	0.338565	rs2517883	Primary	0.546826	0.108531	4.694e-07	0.0212315
ENSG00000066379.10	ZNRD1	30026675	29870427	TG	T	0.058296	rs143017739	Primary	-1.53229	0.20035	2.04281e-14	9.23984e-10
ENSG00000066379.10	ZNRD1	30026675	29870615	A	G	0.32287	rs2517876	Primary	0.529727	0.108984	1.17047e-06	0.0529417
ENSG00000066379.10	ZNRD1	30026675	29871036	G	A	0.0560538	rs9259556	Primary	-1.59419	0.207198	1.42109e-14	6.42771e-10
ENSG00000066379.10	ZNRD1	30026675	29871484	G	A	0.0560538	rs9259563	Primary	-1.59419	0.207198	1.42109e-14	6.42771e-10
ENSG00000066379.10	ZNRD1	30026675	29871671	G	A	0.33296	rs2517865	Primary	0.5267	0.108129	1.11028e-06	0.0502189
ENSG00000066379.10	ZNRD1	30026675	29872512	T	G	0.33296	rs2517831	Primary	0.528164	0.107974	1.00023e-06	0.0452414
ENSG00000066379.10	ZNRD1	30026675	29872774	A	G	0.33296	rs2517828	Primary	0.528164	0.107974	1.00023e-06	0.0452414
ENSG00000066379.10	ZNRD1	30026675	29873154	C	T	0.0560538	rs9259572	Primary	-1.59574	0.207705	1.55431e-14	7.03031e-10
ENSG00000066379.10	ZNRD1	30026675	29874239	G	A	0.0571749	rs9259602	Primary	-1.56679	0.201887	8.43769e-15	3.81645e-10
ENSG00000066379.10	ZNRD1	30026675	29875052	A	G	0.0515695	rs9259621	Primary	-1.57446	0.210873	8.23785e-14	3.72606e-09
ENSG00000066379.10	ZNRD1	30026675	29875141	T	C	0.0571749	rs9259623	Primary	-1.55709	0.201364	1.05471e-14	4.77057e-10
ENSG00000066379.10	ZNRD1	30026675	29875677	C	G	0.0571749	rs9259633	Primary	-1.5788	0.201324	4.44089e-15	2.00866e-10
ENSG00000066379.10	ZNRD1	30026675	29877792	C	T	0.0571749	rs4499966	Primary	-1.56494	0.202265	1.02141e-14	4.61992e-10
ENSG00000066379.10	ZNRD1	30026675	29878852	C	A	0.0571749	rs9259682	Primary	-1.56679	0.201887	8.43769e-15	3.81645e-10
ENSG00000066379.10	ZNRD1	30026675	29881038	G	C	0.0549327	rs9259705	Primary	-1.60988	0.208548	1.16573e-14	5.27273e-10
ENSG00000066379.10	ZNRD1	30026675	29882243	A	C	0.0549327	rs9259710	Primary	-1.59695	0.208485	1.86517e-14	8.43637e-10
ENSG00000066379.10	ZNRD1	30026675	29883076	C	G	0.73991	rs1632921	Primary	0.738123	0.118141	4.16294e-10	1.88294e-05
ENSG00000066379.10	ZNRD1	30026675	29883189	C	T	0.0571749	rs2394244	Primary	-1.53999	0.207602	1.18905e-13	5.37819e-09
ENSG00000066379.10	ZNRD1	30026675	29884272	G	C	0.0549327	rs9259720	Primary	-1.60838	0.208906	1.36557e-14	6.17663e-10
ENSG00000066379.10	ZNRD1	30026675	29885086	C	G	0.0549327	rs9259730	Primary	-1.59889	0.208097	1.55431e-14	7.03031e-10
ENSG00000066379.10	ZNRD1	30026675	29885362	G	A	0.0549327	rs9259733	Primary	-1.61283	0.208671	1.08802e-14	4.92122e-10
ENSG00000066379.10	ZNRD1	30026675	29885372	C	T	0.0549327	rs9259734	Primary	-1.61283	0.208671	1.08802e-14	4.92122e-10
ENSG00000066379.10	ZNRD1	30026675	29885545	TCCAAGGGC	T	0.0549327	.	Primary	-1.60988	0.208548	1.16573e-14	5.27273e-10
ENSG00000066379.10	ZNRD1	30026675	29885774	G	A	0.742152	rs1611489	Primary	0.755321	0.117804	1.43945e-10	6.51076e-06
ENSG00000066379.10	ZNRD1	30026675	29886073	T	C	0.0538117	rs9259738	Primary	-1.63462	0.215258	3.10862e-14	1.40606e-09
ENSG00000066379.10	ZNRD1	30026675	29886216	T	G	0.707399	rs1632915	Primary	0.69173	0.116147	2.59029e-09	0.000117161
ENSG00000066379.10	ZNRD1	30026675	29886365	T	C	0.0627803	rs9259740	Primary	-1.45191	0.203044	8.63309e-13	3.90483e-08
ENSG00000066379.10	ZNRD1	30026675	29886436	T	C	0.0627803	rs9259741	Primary	-1.45191	0.203044	8.63309e-13	3.90483e-08
ENSG00000066379.10	ZNRD1	30026675	29886714	A	G	0.538117	rs2734919	Primary	0.773384	0.101773	2.9865e-14	1.35082e-09
ENSG00000066379.10	ZNRD1	30026675	29887114	G	A	0.683857	rs2734918	Primary	0.557161	0.113717	9.60699e-07	0.0434534
ENSG00000066379.10	ZNRD1	30026675	29887292	G	A	0.0549327	rs9259748	Primary	-1.59506	0.207992	1.73195e-14	7.83377e-10
ENSG00000066379.10	ZNRD1	30026675	29887684	G	A	0.0538117	rs9259750	Primary	-1.63345	0.215629	3.58602e-14	1.62199e-09
ENSG00000066379.10	ZNRD1	30026675	29887756	AAAG	A	0.0493274	rs369515369	Primary	-1.53825	0.223822	6.30151e-12	2.85024e-07
ENSG00000066379.10	ZNRD1	30026675	29887830	C	T	0.0526906	rs9259751	Primary	-1.65144	0.219358	5.12923e-14	2.32e-09
ENSG00000066379.10	ZNRD1	30026675	29887849	A	T	0.0526906	rs2524015	Primary	-1.65144	0.219358	5.12923e-14	2.32e-09
ENSG00000066379.10	ZNRD1	30026675	29888046	G	A	0.0526906	rs9259753	Primary	-1.67502	0.219396	2.26485e-14	1.02442e-09
ENSG00000066379.10	ZNRD1	30026675	29888157	T	A	0.0549327	rs9259754	Primary	-1.59695	0.208766	2.02061e-14	9.1394e-10
ENSG00000066379.10	ZNRD1	30026675	29888524	G	C	0.0549327	rs9259757	Primary	-1.61127	0.209034	1.27676e-14	5.7749e-10
ENSG00000066379.10	ZNRD1	30026675	29889348	GT	G	0.0549327	rs139111824	Primary	-1.60988	0.208548	1.16573e-14	5.27273e-10
ENSG00000066379.10	ZNRD1	30026675	29889514	T	C	0.485426	rs2571426	Primary	0.595195	0.106181	2.0766e-08	0.000939266
ENSG00000066379.10	ZNRD1	30026675	29889622	A	G	0.571749	rs2905778	Primary	0.674215	0.10481	1.25316e-10	5.66817e-06
ENSG00000066379.10	ZNRD1	30026675	29889630	A	G	0.476457	rs2471870	Primary	0.549357	0.106536	2.51576e-07	0.011379
ENSG00000066379.10	ZNRD1	30026675	29889668	A	G	0.0538117	rs9259768	Primary	-1.62961	0.218869	9.64784e-14	4.36381e-09
ENSG00000066379.10	ZNRD1	30026675	29889779	A	G	0.576233	rs2844811	Primary	0.707181	0.104313	1.20687e-11	5.45878e-07
ENSG00000066379.10	ZNRD1	30026675	29889832	G	T	0.0549327	rs9259773	Primary	-1.58134	0.209246	4.11893e-14	1.86303e-09
ENSG00000066379.10	ZNRD1	30026675	29889842	G	A	0.0549327	rs9259774	Primary	-1.58134	0.209246	4.11893e-14	1.86303e-09
ENSG00000066379.10	ZNRD1	30026675	29890442	C	T	0.0549327	rs9259781	Primary	-1.61283	0.208671	1.08802e-14	4.92122e-10
ENSG00000066379.10	ZNRD1	30026675	29890448	T	C	0.780269	rs1611392	Primary	0.727245	0.125233	6.35524e-09	0.000287454
ENSG00000066379.10	ZNRD1	30026675	29890557	T	TCTAA	0.775785	.	Primary	0.724511	0.125183	7.14008e-09	0.000322953
ENSG00000066379.10	ZNRD1	30026675	29890566	G	A	0.4787	rs2905777	Primary	0.62087	0.108727	1.12748e-08	0.00050997
ENSG00000066379.10	ZNRD1	30026675	29890615	C	A	0.482063	rs2975016	Primary	0.598939	0.107544	2.55819e-08	0.00115709
ENSG00000066379.10	ZNRD1	30026675	29890620	A	G	0.776906	rs1611397	Primary	0.704874	0.125472	1.93448e-08	0.000874987
ENSG00000066379.10	ZNRD1	30026675	29890701	C	G	0.779148	rs9259784	Primary	0.726005	0.125231	6.73757e-09	0.000304747
ENSG00000066379.10	ZNRD1	30026675	29890739	C	T	0.779148	rs1611398	Primary	0.726005	0.125231	6.73757e-09	0.000304747
ENSG00000066379.10	ZNRD1	30026675	29890809	C	G	0.485426	rs2437067	Primary	0.6059	0.106647	1.33638e-08	0.000604457
ENSG00000066379.10	ZNRD1	30026675	29890869	G	T	0.485426	rs2471868	Primary	0.6059	0.106647	1.33638e-08	0.000604457
ENSG00000066379.10	ZNRD1	30026675	29890918	C	T	0.779148	rs1611400	Primary	0.718509	0.125426	1.01288e-08	0.000458136
ENSG00000066379.10	ZNRD1	30026675	29891278	G	C	0.471973	rs9647649	Primary	0.642183	0.109359	4.29927e-09	0.00019446
ENSG00000066379.10	ZNRD1	30026675	29891292	TC	T	0.471973	rs68042301	Primary	0.642183	0.109359	4.29927e-09	0.00019446
ENSG00000066379.10	ZNRD1	30026675	29891455	T	C	0.483184	rs3129028	Primary	0.608024	0.107325	1.46809e-08	0.000664032
ENSG00000066379.10	ZNRD1	30026675	29891483	A	G	0.483184	rs3129027	Primary	0.589148	0.107132	3.81401e-08	0.00172511
ENSG00000066379.10	ZNRD1	30026675	29891493	G	A	0.483184	rs3129026	Primary	0.589148	0.107132	3.81401e-08	0.00172511
ENSG00000066379.10	ZNRD1	30026675	29891617	G	A	0.483184	rs3129025	Primary	0.597102	0.107208	2.55368e-08	0.00115506
ENSG00000066379.10	ZNRD1	30026675	29891825	C	T	0.495516	rs2975014	Primary	0.564981	0.107074	1.31621e-07	0.00595336
ENSG00000066379.10	ZNRD1	30026675	29891826	A	G	0.788117	rs1611415	Primary	0.72038	0.128331	1.98326e-08	0.00089705
ENSG00000066379.10	ZNRD1	30026675	29891837	T	C	0.0526906	rs9259797	Primary	-1.68811	0.225554	7.19425e-14	3.25403e-09
ENSG00000066379.10	ZNRD1	30026675	29891849	C	T	0.0526906	rs9259798	Primary	-1.68811	0.225554	7.19425e-14	3.25403e-09
ENSG00000066379.10	ZNRD1	30026675	29892104	G	A	0.485426	rs2517785	Primary	0.6059	0.106647	1.33638e-08	0.000604457
ENSG00000066379.10	ZNRD1	30026675	29892196	A	T	0.484305	rs2517784	Primary	0.61067	0.106802	1.07913e-08	0.000488101
ENSG00000066379.10	ZNRD1	30026675	29892262	G	A	0.0538117	rs9259803	Primary	-1.63189	0.215131	3.30846e-14	1.49645e-09
ENSG00000066379.10	ZNRD1	30026675	29892319	G	A	0.0549327	rs9259804	Primary	-1.60988	0.208548	1.16573e-14	5.27273e-10
ENSG00000066379.10	ZNRD1	30026675	29892436	C	G	0.0538117	rs9259806	Primary	-1.60872	0.212426	3.64153e-14	1.6471e-09
ENSG00000066379.10	ZNRD1	30026675	29892475	T	C	0.0538117	rs9259807	Primary	-1.63345	0.215629	3.58602e-14	1.62199e-09
ENSG00000066379.10	ZNRD1	30026675	29892571	A	AAATT	0.756726	.	Primary	0.612739	0.120655	3.80587e-07	0.0172143
ENSG00000066379.10	ZNRD1	30026675	29892615	C	T	0.457399	rs2517782	Primary	0.552499	0.108621	3.64777e-07	0.0164992
ENSG00000066379.10	ZNRD1	30026675	29892709	A	G	0.452915	rs2517781	Primary	0.581696	0.107468	6.20652e-08	0.00280727
ENSG00000066379.10	ZNRD1	30026675	29893168	C	T	0.0549327	rs9259813	Primary	-1.59384	0.208632	2.17604e-14	9.84243e-10
ENSG00000066379.10	ZNRD1	30026675	29893373	A	G	0.0549327	rs9259814	Primary	-1.61283	0.208671	1.08802e-14	4.92122e-10
ENSG00000066379.10	ZNRD1	30026675	29893498	G	C	0.0549327	rs9259818	Primary	-1.61283	0.208671	1.08802e-14	4.92122e-10
ENSG00000066379.10	ZNRD1	30026675	29893501	A	T	0.75	rs1611432	Primary	0.623464	0.120624	2.35774e-07	0.0106643
ENSG00000066379.10	ZNRD1	30026675	29893560	A	G	0.358744	rs13214629	Conditional 2	0.526458	0.110345	1.83304e-06	0.0829101
ENSG00000066379.10	ZNRD1	30026675	29893886	C	T	0.0549327	rs9259822	Primary	-1.59277	0.207739	1.75415e-14	7.93421e-10
ENSG00000066379.10	ZNRD1	30026675	29894205	T	C	0.357623	rs2517772	Conditional 2	0.533786	0.110448	1.34539e-06	0.0608533
ENSG00000066379.10	ZNRD1	30026675	29894226	G	T	0.357623	rs2074487	Conditional 2	0.533786	0.110448	1.34539e-06	0.0608533
ENSG00000066379.10	ZNRD1	30026675	29894410	C	T	0.414798	rs2904763	Primary	0.553487	0.107895	2.89934e-07	0.013114
ENSG00000066379.10	ZNRD1	30026675	29894569	T	C	0.0549327	rs9259824	Primary	-1.60988	0.208548	1.16573e-14	5.27273e-10
ENSG00000066379.10	ZNRD1	30026675	29894580	T	G	0.780269	rs2571425	Primary	0.726118	0.124203	5.02818e-09	0.00022743
ENSG00000066379.10	ZNRD1	30026675	29894798	T	C	0.357623	rs2517767	Conditional 1	0.530815	0.112094	2.18578e-06	0.0988649
ENSG00000066379.10	ZNRD1	30026675	29894853	C	T	0.0852018	rs9259825	Primary	-1.0133	0.177968	1.24308e-08	0.000562256
ENSG00000066379.10	ZNRD1	30026675	29895228	G	T	0.0549327	rs9259831	Primary	-1.61283	0.208671	1.08802e-14	4.92122e-10
ENSG00000066379.10	ZNRD1	30026675	29895816	A	T	0.75	rs2517760	Primary	0.623464	0.120624	2.35774e-07	0.0106643
ENSG00000066379.10	ZNRD1	30026675	29895913	G	A	0.357623	rs13201148	Conditional 2	0.533786	0.110448	1.34539e-06	0.0608533
ENSG00000066379.10	ZNRD1	30026675	29895944	G	A	0.357623	rs13204255	Conditional 2	0.533786	0.110448	1.34539e-06	0.0608533
ENSG00000066379.10	ZNRD1	30026675	29895958	C	A	0.0549327	rs9259841	Primary	-1.61283	0.208671	1.08802e-14	4.92122e-10
ENSG00000066379.10	ZNRD1	30026675	29896045	CAG	C	0.357623	.	Primary	0.513061	0.108284	2.15706e-06	0.0975662
ENSG00000066379.10	ZNRD1	30026675	29896054	C	A	0.754484	rs9259844	Primary	0.617218	0.120828	3.2521e-07	0.0147096
ENSG00000066379.10	ZNRD1	30026675	29896272	G	A	0.0549327	rs9259851	Primary	-1.59889	0.208097	1.55431e-14	7.03031e-10
ENSG00000066379.10	ZNRD1	30026675	29896466	C	T	0.0549327	rs9259853	Primary	-1.59695	0.208485	1.86517e-14	8.43637e-10
ENSG00000066379.10	ZNRD1	30026675	29896481	C	A	0.0549327	rs9259854	Primary	-1.59695	0.208485	1.86517e-14	8.43637e-10
ENSG00000066379.10	ZNRD1	30026675	29896680	A	G	0.463004	rs2517754	Primary	0.589315	0.107078	3.72124e-08	0.00168315
ENSG00000066379.10	ZNRD1	30026675	29896847	T	TGA	0.747758	rs10626879	Primary	0.622041	0.120728	2.57172e-07	0.0116321
ENSG00000066379.10	ZNRD1	30026675	29897259	T	A	0.357623	rs2517749	Conditional 2	0.533786	0.110448	1.34539e-06	0.0608533
ENSG00000066379.10	ZNRD1	30026675	29897350	C	T	0.352018	rs2517748	Conditional 2	0.520385	0.10859	1.64983e-06	0.0746233
ENSG00000066379.10	ZNRD1	30026675	29897694	G	A	0.357623	rs2517745	Conditional 2	0.535665	0.10943	9.82877e-07	0.0444565
ENSG00000066379.10	ZNRD1	30026675	29897710	G	A	0.0549327	rs9259863	Primary	-1.59277	0.207739	1.75415e-14	7.93421e-10
ENSG00000066379.10	ZNRD1	30026675	29897776	C	A	0.0549327	rs9259866	Primary	-1.59277	0.207739	1.75415e-14	7.93421e-10
ENSG00000066379.10	ZNRD1	30026675	29897802	G	A	0.0549327	rs9259867	Primary	-1.59277	0.207739	1.75415e-14	7.93421e-10
ENSG00000066379.10	ZNRD1	30026675	29898024	C	T	0.0549327	rs9259873	Primary	-1.59889	0.208097	1.55431e-14	7.03031e-10
ENSG00000066379.10	ZNRD1	30026675	29898108	A	T	0.357623	rs2975010	Conditional 2	0.533786	0.110448	1.34539e-06	0.0608533
ENSG00000066379.10	ZNRD1	30026675	29898116	C	T	0.438341	rs2975009	Primary	0.523385	0.101169	2.2991e-07	0.010399
ENSG00000066379.10	ZNRD1	30026675	29898226	G	A	0.357623	rs2905773	Conditional 2	0.533786	0.110448	1.34539e-06	0.0608533
ENSG00000066379.10	ZNRD1	30026675	29899089	AG	A	0.0549327	rs9278447	Primary	-1.61283	0.208671	1.08802e-14	4.92122e-10
ENSG00000066379.10	ZNRD1	30026675	29899176	G	A	0.0549327	rs9259905	Primary	-1.61283	0.208671	1.08802e-14	4.92122e-10
ENSG00000066379.10	ZNRD1	30026675	29899212	G	T	0.0549327	rs9259908	Primary	-1.61283	0.208671	1.08802e-14	4.92122e-10
ENSG00000066379.10	ZNRD1	30026675	29899389	C	T	0.0549327	rs9259910	Primary	-1.61127	0.209034	1.27676e-14	5.7749e-10
ENSG00000066379.10	ZNRD1	30026675	29899483	C	T	0.0549327	rs9259912	Primary	-1.61283	0.208671	1.08802e-14	4.92122e-10
ENSG00000066379.10	ZNRD1	30026675	29901917	A	G	0.0549327	rs9259920	Primary	-1.61127	0.209034	1.27676e-14	5.7749e-10
ENSG00000066379.10	ZNRD1	30026675	29902242	T	C	0.0549327	rs9259926	Primary	-1.61127	0.209034	1.27676e-14	5.7749e-10
ENSG00000066379.10	ZNRD1	30026675	29902327	G	T	0.401345	rs2975007	Primary	0.619697	0.0999561	5.65744e-10	2.55892e-05
ENSG00000066379.10	ZNRD1	30026675	29902435	G	C	0.0549327	rs9259929	Primary	-1.60204	0.208232	1.43219e-14	6.47793e-10
ENSG00000066379.10	ZNRD1	30026675	29902714	T	G	0.356502	rs7770901	Conditional 2	0.531494	0.110824	1.61982e-06	0.073266
ENSG00000066379.10	ZNRD1	30026675	29902774	A	G	0.353139	rs28749095	Conditional 2	0.538533	0.109267	8.28277e-07	0.0374638
ENSG00000066379.10	ZNRD1	30026675	29902779	G	A	0.0549327	rs9259933	Primary	-1.61283	0.208671	1.08802e-14	4.92122e-10
ENSG00000066379.10	ZNRD1	30026675	29903013	CT	C	0.349776	rs11312290	Conditional 2	0.524501	0.108801	1.43025e-06	0.0646916
ENSG00000066379.10	ZNRD1	30026675	29903095	ACT	A	0.0538117	rs9278450	Primary	-1.69351	0.213681	2.22045e-15	1.00433e-10
ENSG00000066379.10	ZNRD1	30026675	29903096	C	*	0.0538117	.	Primary	-1.70223	0.213807	1.66533e-15	7.53247e-11
ENSG00000066379.10	ZNRD1	30026675	29903218	G	A	0.0549327	rs9259937	Primary	-1.59277	0.207739	1.75415e-14	7.93421e-10
ENSG00000066379.10	ZNRD1	30026675	29903306	A	G	0.347534	rs2437062	Conditional 2	0.526897	0.111287	2.19511e-06	0.0992871
ENSG00000066379.10	ZNRD1	30026675	29903404	C	T	0.376682	rs3094678	Primary	0.59599	0.109459	5.18426e-08	0.00234489
ENSG00000066379.10	ZNRD1	30026675	29904769	A	G	0.467489	rs2523999	Primary	0.540477	0.100494	7.52348e-08	0.00340294
ENSG00000066379.10	ZNRD1	30026675	29905380	G	C	0.356502	rs28749112	Conditional 2	0.531494	0.110824	1.61982e-06	0.073266
ENSG00000066379.10	ZNRD1	30026675	29905451	C	A	0.356502	rs28749113	Conditional 2	0.531494	0.110824	1.61982e-06	0.073266
ENSG00000066379.10	ZNRD1	30026675	29905452	A	G	0.356502	rs28749114	Conditional 2	0.531494	0.110824	1.61982e-06	0.073266
ENSG00000066379.10	ZNRD1	30026675	29905628	C	G	0.356502	rs13190729	Conditional 2	0.531494	0.110824	1.61982e-06	0.073266
ENSG00000066379.10	ZNRD1	30026675	29905629	G	A	0.343049	rs1632892	Conditional 1	-0.578285	0.116228	6.5099e-07	0.0294449
ENSG00000066379.10	ZNRD1	30026675	29905671	T	TC	0.362108	rs145549063	Primary	0.520249	0.109175	1.88602e-06	0.0853067
ENSG00000066379.10	ZNRD1	30026675	29906356	AAT	A	0.0482063	rs113403777	Primary	-1.94601	0.250004	6.99441e-15	3.16364e-10
ENSG00000066379.10	ZNRD1	30026675	29906597	G	A	0.0482063	rs9260017	Primary	-1.94601	0.250004	6.99441e-15	3.16364e-10
ENSG00000066379.10	ZNRD1	30026675	29906681	C	T	0.0482063	rs9260018	Primary	-1.94601	0.250004	6.99441e-15	3.16364e-10
ENSG00000066379.10	ZNRD1	30026675	29906724	A	G	0.307175	rs2904760	Conditional 1	0.623883	0.130157	1.6405e-06	0.0742013
ENSG00000066379.10	ZNRD1	30026675	29906783	C	T	0.307175	rs9368614	Conditional 1	0.623883	0.130157	1.6405e-06	0.0742013
ENSG00000066379.10	ZNRD1	30026675	29906813	G	T	0.307175	rs9368615	Conditional 1	0.623883	0.130157	1.6405e-06	0.0742013
ENSG00000066379.10	ZNRD1	30026675	29906981	G	C	0.307175	rs13198419	Conditional 1	0.623883	0.130157	1.6405e-06	0.0742013
ENSG00000066379.10	ZNRD1	30026675	29907030	C	T	0.0482063	rs9260024	Primary	-1.94601	0.250004	6.99441e-15	3.16364e-10
ENSG00000066379.10	ZNRD1	30026675	29907123	C	T	0.307175	rs28749115	Conditional 1	0.623883	0.130157	1.6405e-06	0.0742013
ENSG00000066379.10	ZNRD1	30026675	29907159	A	G	0.307175	rs28749117	Conditional 1	0.623883	0.130157	1.6405e-06	0.0742013
ENSG00000066379.10	ZNRD1	30026675	29907164	G	T	0.307175	rs28749118	Conditional 1	0.623883	0.130157	1.6405e-06	0.0742013
ENSG00000066379.10	ZNRD1	30026675	29907201	C	T	0.307175	rs28749119	Conditional 1	0.623883	0.130157	1.6405e-06	0.0742013
ENSG00000066379.10	ZNRD1	30026675	29907313	G	A	0.307175	rs28749120	Conditional 1	0.623883	0.130157	1.6405e-06	0.0742013
ENSG00000066379.10	ZNRD1	30026675	29907451	C	T	0.307175	rs28749121	Conditional 1	0.623883	0.130157	1.6405e-06	0.0742013
ENSG00000066379.10	ZNRD1	30026675	29907466	T	C	0.307175	rs28749122	Conditional 1	0.623883	0.130157	1.6405e-06	0.0742013
ENSG00000066379.10	ZNRD1	30026675	29907467	C	T	0.307175	rs28749123	Conditional 1	0.623883	0.130157	1.6405e-06	0.0742013
ENSG00000066379.10	ZNRD1	30026675	29907510	C	G	0.0482063	rs9260037	Primary	-1.94601	0.250004	6.99441e-15	3.16364e-10
ENSG00000066379.10	ZNRD1	30026675	29908006	G	A	0.0482063	rs9260045	Primary	-1.94601	0.250004	6.99441e-15	3.16364e-10
ENSG00000066379.10	ZNRD1	30026675	29908093	G	A	0.307175	rs28749133	Conditional 1	0.623883	0.130157	1.6405e-06	0.0742013
ENSG00000066379.10	ZNRD1	30026675	29908108	G	T	0.0482063	rs9260051	Primary	-1.94601	0.250004	6.99441e-15	3.16364e-10
ENSG00000066379.10	ZNRD1	30026675	29908156	G	A	0.0482063	rs9260053	Primary	-1.94601	0.250004	6.99441e-15	3.16364e-10
ENSG00000066379.10	ZNRD1	30026675	29908158	C	T	0.306054	rs28749134	Primary	0.598871	0.125753	1.91436e-06	0.0865883
ENSG00000066379.10	ZNRD1	30026675	29908179	C	T	0.306054	rs28749135	Primary	0.598871	0.125753	1.91436e-06	0.0865883
ENSG00000066379.10	ZNRD1	30026675	29908308	C	T	0.304933	rs28749137	Primary	0.602768	0.124615	1.31788e-06	0.0596092
ENSG00000066379.10	ZNRD1	30026675	29908469	T	C	0.307175	rs12202296	Conditional 1	0.623883	0.130157	1.6405e-06	0.0742013
ENSG00000066379.10	ZNRD1	30026675	29910105	G	A	0.0482063	rs9260116	Primary	-1.94601	0.250004	6.99441e-15	3.16364e-10
ENSG00000066379.10	ZNRD1	30026675	29912968	C	G	0.0482063	rs3823339	Primary	-1.94601	0.250004	6.99441e-15	3.16364e-10
ENSG00000066379.10	ZNRD1	30026675	29913515	C	T	0.059417	rs112525507	Primary	-1.56361	0.239091	6.15931e-11	2.78592e-06
ENSG00000066379.10	ZNRD1	30026675	29913881	T	C	0.292601	rs9404954	Conditional 1	0.627923	0.131861	1.91686e-06	0.0867017
ENSG00000066379.10	ZNRD1	30026675	29914057	C	G	0.327354	rs9391669	Primary	0.726771	0.12456	5.38815e-09	0.000243712
ENSG00000066379.10	ZNRD1	30026675	29916467	A	G	0.059417	rs9260303	Primary	-1.56361	0.239091	6.15931e-11	2.78592e-06
ENSG00000066379.10	ZNRD1	30026675	29916681	G	A	0.302691	rs28749158	Primary	0.628788	0.125759	5.73465e-07	0.0259384
ENSG00000066379.10	ZNRD1	30026675	29916686	A	G	0.302691	rs13214982	Primary	0.628788	0.125759	5.73465e-07	0.0259384
ENSG00000066379.10	ZNRD1	30026675	29917373	T	TGCA	0.300448	.	Conditional 1	0.622376	0.129579	1.5627e-06	0.0706826
ENSG00000066379.10	ZNRD1	30026675	29917439	T	C	0.300448	rs2517715	Conditional 1	0.622376	0.129579	1.5627e-06	0.0706826
ENSG00000066379.10	ZNRD1	30026675	29917701	G	A	0.0526906	rs9260366	Primary	-1.7838	0.244732	3.1275e-13	1.4146e-08
ENSG00000066379.10	ZNRD1	30026675	29917800	C	A	0.300448	rs2735093	Conditional 1	0.622376	0.129579	1.5627e-06	0.0706826
ENSG00000066379.10	ZNRD1	30026675	29918173	T	C	0.299327	rs2517712	Conditional 1	0.618941	0.130222	2.00453e-06	0.0906668
ENSG00000066379.10	ZNRD1	30026675	29918315	A	T	0.044843	rs9260391	Primary	-1.90066	0.252802	5.55112e-14	2.51082e-09
ENSG00000066379.10	ZNRD1	30026675	29919433	C	T	0.300448	rs2517708	Conditional 1	0.622376	0.129579	1.5627e-06	0.0706826
ENSG00000066379.10	ZNRD1	30026675	29920400	CCT	C	0.300448	rs28993377	Conditional 1	0.622376	0.129579	1.5627e-06	0.0706826
ENSG00000066379.10	ZNRD1	30026675	29920566	T	C	0.0482063	rs9260497	Primary	-1.94601	0.250004	6.99441e-15	3.16364e-10
ENSG00000066379.10	ZNRD1	30026675	29920905	ACTAG	A	0.058296	rs138369692	Primary	-1.52553	0.228187	2.30201e-11	1.04122e-06
ENSG00000066379.10	ZNRD1	30026675	29921034	T	C	0.308296	rs28749167	Primary	0.583905	0.117861	7.26425e-07	0.0328569
ENSG00000066379.10	ZNRD1	30026675	29921227	C	G	0.274664	rs28780068	Primary	0.606915	0.119902	4.15449e-07	0.0187912
ENSG00000066379.10	ZNRD1	30026675	29921484	C	G	0.326233	.	Primary	0.598882	0.113018	1.16434e-07	0.00526641
ENSG00000066379.10	ZNRD1	30026675	29921700	C	T	0.310538	rs2517703	Primary	0.587019	0.117627	6.02196e-07	0.0272379
ENSG00000066379.10	ZNRD1	30026675	29921863	T	C	0.310538	rs13192355	Primary	0.587019	0.117627	6.02196e-07	0.0272379
ENSG00000066379.10	ZNRD1	30026675	29922090	A	C	0.0493274	rs9260569	Primary	-1.8501	0.238859	9.54792e-15	4.31862e-10
ENSG00000066379.10	ZNRD1	30026675	29922740	A	G	0.318386	rs16896742	Primary	0.693523	0.128264	6.40939e-08	0.00289903
ENSG00000066379.10	ZNRD1	30026675	29922754	C	T	0.406951	rs9260603	Primary	0.61963	0.113961	5.41145e-08	0.00244765
ENSG00000066379.10	ZNRD1	30026675	29923413	G	A	0.0482063	rs9260638	Primary	-1.94601	0.250004	6.99441e-15	3.16364e-10
ENSG00000066379.10	ZNRD1	30026675	29923581	A	G	0.0482063	rs9260642	Primary	-1.94601	0.250004	6.99441e-15	3.16364e-10
ENSG00000066379.10	ZNRD1	30026675	29924833	T	A	0.841928	rs9260671	Primary	0.800765	0.153767	1.91237e-07	0.00864986
ENSG00000066379.10	ZNRD1	30026675	29924996	C	T	0.0549327	rs9260672	Primary	-1.73261	0.239051	4.23328e-13	1.91476e-08
ENSG00000066379.10	ZNRD1	30026675	29925127	G	A	0.294843	rs2844809	Primary	0.626576	0.126992	8.05748e-07	0.0364448
ENSG00000066379.10	ZNRD1	30026675	29925221	C	CA	0.503363	rs9280818	Primary	0.726388	0.11461	2.32904e-10	1.05345e-05
ENSG00000066379.10	ZNRD1	30026675	29925713	T	TG	0.514574	.	Primary	0.770646	0.112182	6.43696e-12	2.9115e-07
ENSG00000066379.10	ZNRD1	30026675	29925972	A	T	0.294843	rs2517701	Primary	0.626576	0.126992	8.05748e-07	0.0364448
ENSG00000066379.10	ZNRD1	30026675	29926300	AGGGACAGTACCCAGG	A	0.28139	rs11267511	Primary	0.653894	0.126639	2.4242e-07	0.0109649
ENSG00000066379.10	ZNRD1	30026675	29926597	T	C	0.475336	rs1632994	Primary	0.622257	0.115516	7.17483e-08	0.00324525
ENSG00000066379.10	ZNRD1	30026675	29927534	A	C	0.0482063	rs9260693	Primary	-1.94601	0.250004	6.99441e-15	3.16364e-10
ENSG00000066379.10	ZNRD1	30026675	29927611	T	C	0.475336	rs2517696	Primary	0.622257	0.115516	7.17483e-08	0.00324525
ENSG00000066379.10	ZNRD1	30026675	29928137	T	C	0.475336	rs441808	Primary	0.622257	0.115516	7.17483e-08	0.00324525
ENSG00000066379.10	ZNRD1	30026675	29928270	C	G	0.511211	rs437464	Primary	0.776971	0.112503	4.97724e-12	2.25126e-07
ENSG00000066379.10	ZNRD1	30026675	29928407	A	G	0.459641	rs437289	Primary	0.55915	0.114576	1.05998e-06	0.0479442
ENSG00000066379.10	ZNRD1	30026675	29928487	T	C	0.258969	rs2508035	Primary	0.642925	0.129059	6.30468e-07	0.0285167
ENSG00000066379.10	ZNRD1	30026675	29928575	T	C	0.511211	rs378337	Primary	0.776971	0.112503	4.97724e-12	2.25126e-07
ENSG00000066379.10	ZNRD1	30026675	29928826	C	T	0.469731	rs2517692	Primary	0.607375	0.114452	1.1155e-07	0.0050455
ENSG00000066379.10	ZNRD1	30026675	29929055	G	T	0.467489	rs2517691	Primary	0.599396	0.114718	1.7422e-07	0.00788012
ENSG00000066379.10	ZNRD1	30026675	29929073	T	C	0.513453	rs2517690	Primary	0.763776	0.112274	1.02631e-11	4.64211e-07
ENSG00000066379.10	ZNRD1	30026675	29929253	C	T	0.456278	rs2517689	Conditional 1	0.584328	0.120734	1.29969e-06	0.0587862
ENSG00000066379.10	ZNRD1	30026675	29930293	ATTGC	A	0.475336	rs142620861	Primary	0.622257	0.115516	7.17483e-08	0.00324525
ENSG00000066379.10	ZNRD1	30026675	29930451	T	C	0.459641	rs2844807	Primary	0.55915	0.114576	1.05998e-06	0.0479442
ENSG00000066379.10	ZNRD1	30026675	29930466	A	G	0.475336	rs2523934	Primary	0.622257	0.115516	7.17483e-08	0.00324525
ENSG00000066379.10	ZNRD1	30026675	29931066	T	C	0.495516	rs2517684	Primary	0.716387	0.112297	1.77769e-10	8.04067e-06
ENSG00000066379.10	ZNRD1	30026675	29931376	C	T	0.0504484	rs9260717	Primary	-1.94227	0.24411	1.77636e-15	8.03464e-11
ENSG00000066379.10	ZNRD1	30026675	29931390	T	G	0.0482063	rs9260718	Primary	-1.94601	0.250004	6.99441e-15	3.16364e-10
ENSG00000066379.10	ZNRD1	30026675	29931419	G	A	0.0482063	rs9260720	Primary	-1.94601	0.250004	6.99441e-15	3.16364e-10
ENSG00000066379.10	ZNRD1	30026675	29931477	GCAATCCCA	G	0.508969	rs142710293	Primary	0.789621	0.11278	2.53342e-12	1.14589e-07
ENSG00000066379.10	ZNRD1	30026675	29931607	C	T	0.459641	rs9260721	Primary	0.55915	0.114576	1.05998e-06	0.0479442
ENSG00000066379.10	ZNRD1	30026675	29931799	A	G	0.511211	rs4628142	Primary	0.776971	0.112503	4.97724e-12	2.25126e-07
ENSG00000066379.10	ZNRD1	30026675	29931905	G	C	0.423767	rs2517683	Primary	0.560681	0.115075	1.10296e-06	0.0498882
ENSG00000066379.10	ZNRD1	30026675	29931940	A	G	0.475336	rs2252960	Primary	0.763295	0.111594	7.923e-12	3.58365e-07
ENSG00000066379.10	ZNRD1	30026675	29932230	C	T	0.0807175	rs9260729	Primary	-0.944431	0.185521	3.56722e-07	0.0161349
ENSG00000066379.10	ZNRD1	30026675	29932330	T	C	0.495516	rs2517681	Primary	0.716387	0.112297	1.77769e-10	8.04067e-06
ENSG00000066379.10	ZNRD1	30026675	29932380	A	T	0.511211	rs2571402	Primary	0.776971	0.112503	4.97724e-12	2.25126e-07
ENSG00000066379.10	ZNRD1	30026675	29932433	G	A	0.0482063	rs9260733	Primary	-1.94601	0.250004	6.99441e-15	3.16364e-10
ENSG00000066379.10	ZNRD1	30026675	29932738	G	C	0.258969	rs9393984	Primary	0.642925	0.129059	6.30468e-07	0.0285167
ENSG00000066379.10	ZNRD1	30026675	29932809	C	T	0.0482063	rs9260736	Primary	-1.94601	0.250004	6.99441e-15	3.16364e-10
ENSG00000066379.10	ZNRD1	30026675	29932865	G	T	0.258969	rs9357088	Primary	0.642925	0.129059	6.30468e-07	0.0285167
ENSG00000066379.10	ZNRD1	30026675	29932897	G	A	0.274664	rs3903160	Primary	0.698803	0.128094	4.88689e-08	0.00221039
ENSG00000066379.10	ZNRD1	30026675	29932914	A	AAC	0.511211	rs144845647	Primary	0.776971	0.112503	4.97724e-12	2.25126e-07
ENSG00000066379.10	ZNRD1	30026675	29932916	T	G	0.511211	.	Primary	0.776971	0.112503	4.97724e-12	2.25126e-07
ENSG00000066379.10	ZNRD1	30026675	29933225	C	T	0.39574	rs2517678	Primary	-0.830105	0.120145	4.87477e-12	2.20491e-07
ENSG00000066379.10	ZNRD1	30026675	29933236	T	C	0.839686	rs9260740	Primary	0.819746	0.155251	1.29091e-07	0.00583892
ENSG00000066379.10	ZNRD1	30026675	29933333	TTTG	T	0.376682	rs143246277	Primary	-0.83735	0.122506	8.19178e-12	3.70522e-07
ENSG00000066379.10	ZNRD1	30026675	29933439	C	T	0.566143	rs2844806	Primary	-0.632809	0.115182	3.92965e-08	0.00177742
ENSG00000066379.10	ZNRD1	30026675	29933945	A	C	0.262332	.	Primary	0.656184	0.130157	4.61962e-07	0.020895
ENSG00000066379.10	ZNRD1	30026675	29933947	A	C	0.257848	.	Primary	0.636286	0.129072	8.23593e-07	0.0372519
ENSG00000066379.10	ZNRD1	30026675	29933954	A	G	0.0493274	rs369678743	Primary	-1.82573	0.243741	6.86118e-14	3.10338e-09
ENSG00000066379.10	ZNRD1	30026675	29933964	G	C	0.0840807	rs7769998	Primary	-0.984286	0.186216	1.25203e-07	0.00566306
ENSG00000066379.10	ZNRD1	30026675	29935107	C	T	0.0840807	rs9260756	Primary	-0.983641	0.185308	1.10742e-07	0.00500899
ENSG00000066379.10	ZNRD1	30026675	29935372	C	T	0.0840807	rs9260759	Primary	-0.983641	0.185308	1.10742e-07	0.00500899
ENSG00000066379.10	ZNRD1	30026675	29935576	G	A	0.283632	rs4538750	Primary	0.644305	0.125102	2.60149e-07	0.0117668
ENSG00000066379.10	ZNRD1	30026675	29935590	C	T	0.283632	rs4391295	Primary	0.644305	0.125102	2.60149e-07	0.0117668
ENSG00000066379.10	ZNRD1	30026675	29936307	A	T	0.283632	rs4959037	Primary	0.644305	0.125102	2.60149e-07	0.0117668
ENSG00000066379.10	ZNRD1	30026675	29936404	T	C	0.282511	rs6927487	Primary	0.632412	0.125705	4.88116e-07	0.022078
ENSG00000066379.10	ZNRD1	30026675	29936630	T	TATAC	0.0459641	.	Primary	-1.76569	0.243721	4.3332e-13	1.95995e-08
ENSG00000066379.10	ZNRD1	30026675	29936664	TATATATACACACAC	T	0.256726	.	Primary	0.658103	0.129919	4.0739e-07	0.0184266
ENSG00000066379.10	ZNRD1	30026675	29936700	CACACAT	C	0.257848	rs199969293	Primary	0.65085	0.130086	5.63757e-07	0.0254993
ENSG00000066379.10	ZNRD1	30026675	29936794	T	TC	0.255605	rs41267238	Primary	0.626766	0.128856	1.14988e-06	0.0520101
ENSG00000066379.10	ZNRD1	30026675	29937104	C	T	0.283632	rs12193110	Primary	0.644305	0.125102	2.60149e-07	0.0117668
ENSG00000066379.10	ZNRD1	30026675	29937148	T	C	0.283632	.	Primary	0.644305	0.125102	2.60149e-07	0.0117668
ENSG00000066379.10	ZNRD1	30026675	29937149	G	T	0.283632	.	Primary	0.644305	0.125102	2.60149e-07	0.0117668
ENSG00000066379.10	ZNRD1	30026675	29937304	A	G	0.0482063	rs9260768	Primary	-1.94601	0.250004	6.99441e-15	3.16364e-10
ENSG00000066379.10	ZNRD1	30026675	29937493	G	C	0.257848	rs4713274	Primary	0.64176	0.129845	7.71317e-07	0.0348874
ENSG00000066379.10	ZNRD1	30026675	29937541	G	A	0.257848	rs11752303	Primary	0.64176	0.129845	7.71317e-07	0.0348874
ENSG00000066379.10	ZNRD1	30026675	29937562	TGAA	T	0.282511	rs71830922	Primary	0.642932	0.125798	3.20728e-07	0.0145069
ENSG00000066379.10	ZNRD1	30026675	29937580	A	C	0.257848	rs4713275	Primary	0.64176	0.129845	7.71317e-07	0.0348874
ENSG00000066379.10	ZNRD1	30026675	29937784	T	C	0.454036	rs2523972	Primary	0.775651	0.111122	2.94786e-12	1.33335e-07
ENSG00000066379.10	ZNRD1	30026675	29937924	T	C	0.836323	rs1061535	Primary	0.807526	0.152251	1.13352e-07	0.00512703
ENSG00000066379.10	ZNRD1	30026675	29938507	C	T	0.267937	rs12195207	Primary	0.611187	0.126413	1.33241e-06	0.0602665
ENSG00000066379.10	ZNRD1	30026675	29941431	G	A	0.255605	rs9295825	Primary	0.640011	0.130447	9.2813e-07	0.0419803
ENSG00000066379.10	ZNRD1	30026675	29941769	G	A	0.412556	rs437941	Primary	0.614333	0.112161	4.31948e-08	0.00195374
ENSG00000066379.10	ZNRD1	30026675	29941786	TAAAC	T	0.0493274	rs145169328	Primary	-1.9438	0.246883	3.44169e-15	1.55671e-10
ENSG00000066379.10	ZNRD1	30026675	29941829	A	T	0.255605	rs9366750	Primary	0.640011	0.130447	9.2813e-07	0.0419803
ENSG00000066379.10	ZNRD1	30026675	29941943	C	T	0.419283	rs2523946	Primary	0.637154	0.111925	1.25074e-08	0.000565721
ENSG00000066379.10	ZNRD1	30026675	29942126	T	G	0.412556	rs2844804	Primary	0.614333	0.112161	4.31948e-08	0.00195374
ENSG00000066379.10	ZNRD1	30026675	29942324	T	C	0.41704	rs2523945	Primary	0.617361	0.112165	3.7121e-08	0.00167902
ENSG00000066379.10	ZNRD1	30026675	29942401	C	G	0.0493274	rs9260823	Primary	-1.9438	0.246883	3.44169e-15	1.55671e-10
ENSG00000066379.10	ZNRD1	30026675	29942439	G	A	0.0493274	rs9260824	Primary	-1.9438	0.246883	3.44169e-15	1.55671e-10
ENSG00000066379.10	ZNRD1	30026675	29942491	T	A	0.0493274	rs9260826	Primary	-1.9438	0.246883	3.44169e-15	1.55671e-10
ENSG00000066379.10	ZNRD1	30026675	29942497	C	T	0.420404	rs393282	Primary	0.625859	0.111645	2.07283e-08	0.000937561
ENSG00000066379.10	ZNRD1	30026675	29942539	G	T	0.255605	.	Primary	0.640011	0.130447	9.2813e-07	0.0419803
ENSG00000066379.10	ZNRD1	30026675	29942678	G	A	0.0493274	rs9260828	Primary	-1.9438	0.246883	3.44169e-15	1.55671e-10
ENSG00000066379.10	ZNRD1	30026675	29942706	C	CCTGCGGTGGT	0.419283	.	Primary	0.637154	0.111925	1.25074e-08	0.000565721
ENSG00000066379.10	ZNRD1	30026675	29942866	T	C	0.0493274	rs2232239	Primary	-1.9438	0.246883	3.44169e-15	1.55671e-10
ENSG00000066379.10	ZNRD1	30026675	29942979	G	C	0.0493274	rs9260830	Primary	-1.9438	0.246883	3.44169e-15	1.55671e-10
ENSG00000066379.10	ZNRD1	30026675	29943178	A	G	0.2713	rs6903753	Primary	0.612449	0.126643	1.32463e-06	0.0599145
ENSG00000066379.10	ZNRD1	30026675	29943469	C	A	0.043722	rs9260833	Primary	-1.96115	0.269205	3.21743e-13	1.45527e-08
ENSG00000066379.10	ZNRD1	30026675	29943475	C	A	0.043722	rs9260834	Primary	-1.96115	0.269205	3.21743e-13	1.45527e-08
ENSG00000066379.10	ZNRD1	30026675	29943528	G	A	0.0493274	rs9260836	Primary	-1.9438	0.246883	3.44169e-15	1.55671e-10
ENSG00000066379.10	ZNRD1	30026675	29943581	C	A	0.0493274	rs9260837	Primary	-1.9438	0.246883	3.44169e-15	1.55671e-10
ENSG00000066379.10	ZNRD1	30026675	29943656	G	T	0.411435	rs2394250	Conditional 1	0.606652	0.125345	1.2993e-06	0.0587688
ENSG00000066379.10	ZNRD1	30026675	29943693	A	AT	0.0392377	.	Primary	-1.78323	0.291311	9.27568e-10	4.19548e-05
ENSG00000066379.10	ZNRD1	30026675	29943702	C	T	0.480942	.	Primary	-0.711835	0.126722	1.93968e-08	0.000877336
ENSG00000066379.10	ZNRD1	30026675	29943715	C	T	0.513453	rs3823363	Conditional 1	-0.621597	0.125692	7.59834e-07	0.034368
ENSG00000066379.10	ZNRD1	30026675	29943866	G	A	0.378924	rs2245950	Primary	-0.790132	0.120436	5.35934e-11	2.42408e-06
ENSG00000066379.10	ZNRD1	30026675	29943916	A	T	0.264574	rs3823369	Primary	0.657955	0.130831	4.92932e-07	0.0222958
ENSG00000066379.10	ZNRD1	30026675	29943947	G	A	0.384529	rs2245958	Primary	-0.753335	0.120854	4.563e-10	2.06389e-05
ENSG00000066379.10	ZNRD1	30026675	29943970	G	A	0.378924	rs2245959	Primary	-0.790132	0.120436	5.35934e-11	2.42408e-06
ENSG00000066379.10	ZNRD1	30026675	29943981	G	A	0.0493274	rs3823372	Primary	-1.9438	0.246883	3.44169e-15	1.55671e-10
ENSG00000066379.10	ZNRD1	30026675	29944896	T	A	0.253363	rs4713279	Primary	0.642858	0.129966	7.56096e-07	0.034199
ENSG00000066379.10	ZNRD1	30026675	29944931	C	G	0.0560538	rs9260859	Primary	-1.70827	0.241487	1.50568e-12	6.81036e-08
ENSG00000066379.10	ZNRD1	30026675	29945210	A	T	0.0493274	rs3823382	Primary	-1.9438	0.246883	3.44169e-15	1.55671e-10
ENSG00000066379.10	ZNRD1	30026675	29945368	A	G	0.0493274	rs3823384	Primary	-1.9438	0.246883	3.44169e-15	1.55671e-10
ENSG00000066379.10	ZNRD1	30026675	29945508	C	T	0.0493274	rs9260860	Primary	-1.9438	0.246883	3.44169e-15	1.55671e-10
ENSG00000066379.10	ZNRD1	30026675	29945841	G	A	0.0493274	rs9260864	Primary	-1.9438	0.246883	3.44169e-15	1.55671e-10
ENSG00000066379.10	ZNRD1	30026675	29945898	T	C	0.0560538	rs9260865	Primary	-1.70827	0.241487	1.50568e-12	6.81036e-08
ENSG00000066379.10	ZNRD1	30026675	29946021	G	A	0.0504484	rs9260867	Primary	-1.9131	0.244534	5.10703e-15	2.30996e-10
ENSG00000066379.10	ZNRD1	30026675	29946157	A	G	0.0493274	rs9260868	Primary	-1.9438	0.246883	3.44169e-15	1.55671e-10
ENSG00000066379.10	ZNRD1	30026675	29946453	C	T	0.0493274	rs9260869	Primary	-1.9438	0.246883	3.44169e-15	1.55671e-10
ENSG00000066379.10	ZNRD1	30026675	29946503	C	T	0.0493274	rs9260870	Primary	-1.9438	0.246883	3.44169e-15	1.55671e-10
ENSG00000066379.10	ZNRD1	30026675	29946571	T	A	0.0493274	rs9260871	Primary	-1.9438	0.246883	3.44169e-15	1.55671e-10
ENSG00000066379.10	ZNRD1	30026675	29946577	C	A	0.0560538	rs9260872	Primary	-1.66498	0.242047	6.0385e-12	2.73128e-07
ENSG00000066379.10	ZNRD1	30026675	29946656	T	C	0.0493274	rs9260873	Primary	-1.9438	0.246883	3.44169e-15	1.55671e-10
ENSG00000066379.10	ZNRD1	30026675	29948401	G	A	0.0493274	rs9260914	Primary	-1.9438	0.246883	3.44169e-15	1.55671e-10
ENSG00000066379.10	ZNRD1	30026675	29948708	C	T	0.0493274	rs9260916	Primary	-1.9438	0.246883	3.44169e-15	1.55671e-10
ENSG00000066379.10	ZNRD1	30026675	29948716	A	T	0.0493274	rs9260917	Primary	-1.9438	0.246883	3.44169e-15	1.55671e-10
ENSG00000066379.10	ZNRD1	30026675	29948751	C	T	0.0863229	rs9260918	Conditional 1	-0.987957	0.204954	1.43288e-06	0.0648104
ENSG00000066379.10	ZNRD1	30026675	29948884	C	T	0.0493274	rs9260919	Primary	-1.9438	0.246883	3.44169e-15	1.55671e-10
ENSG00000066379.10	ZNRD1	30026675	29949047	C	T	0.0493274	rs9260920	Primary	-1.9438	0.246883	3.44169e-15	1.55671e-10
ENSG00000066379.10	ZNRD1	30026675	29949889	C	T	0.0493274	rs9260923	Primary	-1.9438	0.246883	3.44169e-15	1.55671e-10
ENSG00000066379.10	ZNRD1	30026675	29950492	G	A	0.0493274	rs3734832	Primary	-1.9438	0.246883	3.44169e-15	1.55671e-10
ENSG00000066379.10	ZNRD1	30026675	29951782	T	C	0.0493274	rs9260929	Primary	-1.9438	0.246883	3.44169e-15	1.55671e-10
ENSG00000066379.10	ZNRD1	30026675	29951928	A	G	0.514574	rs3873293	Primary	-0.612761	0.117296	1.75027e-07	0.00791667
ENSG00000066379.10	ZNRD1	30026675	29954364	C	G	0.251121	rs4947244	Primary	0.638705	0.130321	9.53421e-07	0.0431242
ENSG00000066379.10	ZNRD1	30026675	29955025	T	C	0.0493274	rs3901554	Primary	-1.9438	0.246883	3.44169e-15	1.55671e-10
ENSG00000066379.10	ZNRD1	30026675	29956953	T	C	0.0493274	rs9260930	Primary	-1.9438	0.246883	3.44169e-15	1.55671e-10
ENSG00000066379.10	ZNRD1	30026675	29957069	A	G	0.293722	rs4959039	Primary	0.74217	0.128573	7.81663e-09	0.000353554
ENSG00000066379.10	ZNRD1	30026675	29957078	A	G	0.514574	rs6457120	Primary	-0.612761	0.117296	1.75027e-07	0.00791667
ENSG00000066379.10	ZNRD1	30026675	29957802	T	C	0.0560538	rs9260932	Primary	-1.70827	0.241487	1.50568e-12	6.81036e-08
ENSG00000066379.10	ZNRD1	30026675	29957866	A	G	0.0493274	rs9260933	Primary	-1.9438	0.246883	3.44169e-15	1.55671e-10
ENSG00000066379.10	ZNRD1	30026675	29958255	CCT	C	0.0470852	.	Primary	-1.91657	0.253856	4.36318e-14	1.97351e-09
ENSG00000066379.10	ZNRD1	30026675	29958358	T	TACAGGACATG	0.0515695	.	Primary	-1.6996	0.245789	4.68281e-12	2.11808e-07
ENSG00000066379.10	ZNRD1	30026675	29958488	T	C	0.0470852	rs9260935	Primary	-1.91657	0.253856	4.36318e-14	1.97351e-09
ENSG00000066379.10	ZNRD1	30026675	29958502	G	A	0.0470852	rs9260936	Primary	-1.91657	0.253856	4.36318e-14	1.97351e-09
ENSG00000066379.10	ZNRD1	30026675	29958648	A	G	0.0470852	rs9260938	Primary	-1.91657	0.253856	4.36318e-14	1.97351e-09
ENSG00000066379.10	ZNRD1	30026675	29958674	C	T	0.0538117	rs9260939	Primary	-1.66135	0.247053	1.76017e-11	7.96142e-07
ENSG00000066379.10	ZNRD1	30026675	29958865	T	A	0.0470852	rs9260941	Primary	-1.91657	0.253856	4.36318e-14	1.97351e-09
ENSG00000066379.10	ZNRD1	30026675	29958933	A	C	0.0470852	rs9260943	Primary	-1.91657	0.253856	4.36318e-14	1.97351e-09
ENSG00000066379.10	ZNRD1	30026675	29959254	G	A	0.0470852	rs9260946	Primary	-1.91657	0.253856	4.36318e-14	1.97351e-09
ENSG00000066379.10	ZNRD1	30026675	29959326	T	C	0.0470852	rs9260948	Primary	-1.91657	0.253856	4.36318e-14	1.97351e-09
ENSG00000066379.10	ZNRD1	30026675	29959366	A	T	0.0470852	rs202063251	Primary	-1.84275	0.250602	1.93401e-13	8.74771e-09
ENSG00000066379.10	ZNRD1	30026675	29959458	G	A	0.0538117	rs9260950	Primary	-1.66135	0.247053	1.76017e-11	7.96142e-07
ENSG00000066379.10	ZNRD1	30026675	29959935	C	G	0.0470852	rs9260954	Primary	-1.91657	0.253856	4.36318e-14	1.97351e-09
ENSG00000066379.10	ZNRD1	30026675	29960083	G	A	0.0470852	rs9260957	Primary	-1.91657	0.253856	4.36318e-14	1.97351e-09
ENSG00000066379.10	ZNRD1	30026675	29960193	C	T	0.0470852	rs9260958	Primary	-1.91657	0.253856	4.36318e-14	1.97351e-09
ENSG00000066379.10	ZNRD1	30026675	29961770	G	A	0.0470852	rs9260976	Primary	-1.91657	0.253856	4.36318e-14	1.97351e-09
ENSG00000066379.10	ZNRD1	30026675	29962028	G	A	0.0470852	rs9260981	Primary	-1.91657	0.253856	4.36318e-14	1.97351e-09
ENSG00000066379.10	ZNRD1	30026675	29962139	G	C	0.0470852	rs9260983	Primary	-1.91657	0.253856	4.36318e-14	1.97351e-09
ENSG00000066379.10	ZNRD1	30026675	29962268	G	A	0.0470852	rs9260984	Primary	-1.91657	0.253856	4.36318e-14	1.97351e-09
ENSG00000066379.10	ZNRD1	30026675	29962517	C	T	0.0538117	.	Primary	-1.66135	0.247053	1.76017e-11	7.96142e-07
ENSG00000066379.10	ZNRD1	30026675	29962595	G	A	0.0470852	rs9260993	Primary	-1.91657	0.253856	4.36318e-14	1.97351e-09
ENSG00000066379.10	ZNRD1	30026675	29962889	C	A	0.251121	rs4959040	Primary	0.638705	0.130321	9.53421e-07	0.0431242
ENSG00000066379.10	ZNRD1	30026675	29963065	A	G	0.513453	rs6457121	Primary	-0.645562	0.116018	2.63178e-08	0.00119038
ENSG00000066379.10	ZNRD1	30026675	29963622	A	G	0.0470852	rs9260998	Primary	-1.91657	0.253856	4.36318e-14	1.97351e-09
ENSG00000066379.10	ZNRD1	30026675	29964314	G	C	0.0470852	rs9261005	Primary	-1.91657	0.253856	4.36318e-14	1.97351e-09
ENSG00000066379.10	ZNRD1	30026675	29964363	T	C	0.512332	rs9261006	Primary	-0.632283	0.116465	5.66851e-08	0.00256393
ENSG00000066379.10	ZNRD1	30026675	29964805	G	A	0.0381166	rs9261011	Primary	-1.89622	0.282706	1.9816e-11	8.96299e-07
ENSG00000066379.10	ZNRD1	30026675	29964999	G	A	0.043722	rs9261014	Primary	-1.87154	0.256816	3.15747e-13	1.42816e-08
ENSG00000066379.10	ZNRD1	30026675	29965938	C	T	0.0470852	rs9261025	Primary	-1.91657	0.253856	4.36318e-14	1.97351e-09
ENSG00000066379.10	ZNRD1	30026675	29966000	A	C	0.0627803	rs9261027	Primary	-1.26539	0.236842	9.15544e-08	0.0041411
ENSG00000066379.10	ZNRD1	30026675	29966017	C	A	0.0470852	rs9261028	Primary	-1.91657	0.253856	4.36318e-14	1.97351e-09
ENSG00000066379.10	ZNRD1	30026675	29966041	T	C	0.0470852	rs9261029	Primary	-1.91657	0.253856	4.36318e-14	1.97351e-09
ENSG00000066379.10	ZNRD1	30026675	29966124	T	A	0.0470852	rs9261032	Primary	-1.91657	0.253856	4.36318e-14	1.97351e-09
ENSG00000066379.10	ZNRD1	30026675	29966141	C	G	0.0571749	rs9261034	Primary	-1.49985	0.241513	5.29035e-10	2.39288e-05
ENSG00000066379.10	ZNRD1	30026675	29966175	G	A	0.0470852	rs9261035	Primary	-1.91657	0.253856	4.36318e-14	1.97351e-09
ENSG00000066379.10	ZNRD1	30026675	29966301	G	A	0.0470852	rs9261036	Primary	-1.91657	0.253856	4.36318e-14	1.97351e-09
ENSG00000066379.10	ZNRD1	30026675	29966465	A	G	0.0538117	rs9261037	Primary	-1.66135	0.247053	1.76017e-11	7.96142e-07
ENSG00000066379.10	ZNRD1	30026675	29966513	T	C	0.0470852	rs9261038	Primary	-1.91657	0.253856	4.36318e-14	1.97351e-09
ENSG00000066379.10	ZNRD1	30026675	29966609	T	C	0.0470852	rs60466513	Primary	-1.91657	0.253856	4.36318e-14	1.97351e-09
ENSG00000066379.10	ZNRD1	30026675	29966620	A	G	0.0470852	rs9261040	Primary	-1.91657	0.253856	4.36318e-14	1.97351e-09
ENSG00000066379.10	ZNRD1	30026675	29966718	A	G	0.0470852	rs9261041	Primary	-1.91657	0.253856	4.36318e-14	1.97351e-09
ENSG00000066379.10	ZNRD1	30026675	29966721	A	T	0.0470852	rs9261042	Primary	-1.91657	0.253856	4.36318e-14	1.97351e-09
ENSG00000066379.10	ZNRD1	30026675	29966749	C	G	0.0470852	rs9261044	Primary	-1.91657	0.253856	4.36318e-14	1.97351e-09
ENSG00000066379.10	ZNRD1	30026675	29966867	G	A	0.0470852	rs9261045	Primary	-1.91657	0.253856	4.36318e-14	1.97351e-09
ENSG00000066379.10	ZNRD1	30026675	29967002	AT	A	0.0470852	.	Primary	-1.92167	0.254079	3.93019e-14	1.77766e-09
ENSG00000066379.10	ZNRD1	30026675	29967004	G	C	0.0470852	.	Primary	-1.91938	0.254181	4.30767e-14	1.9484e-09
ENSG00000066379.10	ZNRD1	30026675	29967302	A	G	0.512332	rs6923777	Primary	-0.632283	0.116465	5.66851e-08	0.00256393
ENSG00000066379.10	ZNRD1	30026675	29967486	T	C	0.0470852	rs6903621	Primary	-1.91657	0.253856	4.36318e-14	1.97351e-09
ENSG00000066379.10	ZNRD1	30026675	29967618	C	T	0.0538117	rs6924054	Primary	-1.66135	0.247053	1.76017e-11	7.96142e-07
ENSG00000066379.10	ZNRD1	30026675	29967736	A	G	0.0695067	rs6924097	Primary	-1.27384	0.223598	1.21932e-08	0.00055151
ENSG00000066379.10	ZNRD1	30026675	29967742	T	C	0.0661435	rs6904120	Primary	-1.33394	0.2281	4.97372e-09	0.000224967
ENSG00000066379.10	ZNRD1	30026675	29967799	C	G	0.0470852	rs9261056	Primary	-1.91657	0.253856	4.36318e-14	1.97351e-09
ENSG00000066379.10	ZNRD1	30026675	29967810	A	G	0.0470852	rs6924273	Primary	-1.91657	0.253856	4.36318e-14	1.97351e-09
ENSG00000066379.10	ZNRD1	30026675	29967999	T	C	0.0470852	rs9261059	Primary	-1.91657	0.253856	4.36318e-14	1.97351e-09
ENSG00000066379.10	ZNRD1	30026675	29968306	G	T	0.0470852	rs9261063	Primary	-1.91657	0.253856	4.36318e-14	1.97351e-09
ENSG00000066379.10	ZNRD1	30026675	29968374	G	A	0.0504484	rs9261064	Primary	-1.76365	0.248126	1.1785e-12	5.33048e-08
ENSG00000066379.10	ZNRD1	30026675	29968394	C	A	0.0504484	rs9261065	Primary	-1.76365	0.248126	1.1785e-12	5.33048e-08
ENSG00000066379.10	ZNRD1	30026675	29968407	G	A	0.0470852	rs9261066	Primary	-1.91657	0.253856	4.36318e-14	1.97351e-09
ENSG00000066379.10	ZNRD1	30026675	29968457	C	T	0.0470852	rs9261067	Primary	-1.91657	0.253856	4.36318e-14	1.97351e-09
ENSG00000066379.10	ZNRD1	30026675	29968458	A	G	0.0538117	rs9261068	Primary	-1.66135	0.247053	1.76017e-11	7.96142e-07
ENSG00000066379.10	ZNRD1	30026675	29968507	T	C	0.0538117	rs9261070	Primary	-1.66135	0.247053	1.76017e-11	7.96142e-07
ENSG00000066379.10	ZNRD1	30026675	29968557	G	A	0.0470852	rs9261071	Primary	-1.91657	0.253856	4.36318e-14	1.97351e-09
ENSG00000066379.10	ZNRD1	30026675	29968564	T	A	0.0470852	rs9261072	Primary	-1.91657	0.253856	4.36318e-14	1.97351e-09
ENSG00000066379.10	ZNRD1	30026675	29968621	G	A	0.0470852	rs9261075	Primary	-1.91657	0.253856	4.36318e-14	1.97351e-09
ENSG00000066379.10	ZNRD1	30026675	29968655	A	G	0.044843	rs9261076	Primary	-1.76234	0.262275	1.82446e-11	8.25223e-07
ENSG00000066379.10	ZNRD1	30026675	29968681	T	C	0.044843	rs113922358	Primary	-1.76234	0.262275	1.82446e-11	8.25223e-07
ENSG00000066379.10	ZNRD1	30026675	29968987	A	G	0.0470852	rs9261080	Primary	-1.91657	0.253856	4.36318e-14	1.97351e-09
ENSG00000066379.10	ZNRD1	30026675	29969040	T	C	0.0470852	rs9261081	Primary	-1.91657	0.253856	4.36318e-14	1.97351e-09
ENSG00000066379.10	ZNRD1	30026675	29969199	C	T	0.0470852	rs9261082	Primary	-1.91657	0.253856	4.36318e-14	1.97351e-09
ENSG00000066379.10	ZNRD1	30026675	29969205	C	G	0.0470852	rs9261083	Primary	-1.91657	0.253856	4.36318e-14	1.97351e-09
ENSG00000066379.10	ZNRD1	30026675	29969223	C	T	0.0470852	rs9261084	Primary	-1.91657	0.253856	4.36318e-14	1.97351e-09
ENSG00000066379.10	ZNRD1	30026675	29969330	A	AC	0.0538117	rs9280837	Primary	-1.66135	0.247053	1.76017e-11	7.96142e-07
ENSG00000066379.10	ZNRD1	30026675	29969513	T	C	0.0538117	rs9261085	Primary	-1.66135	0.247053	1.76017e-11	7.96142e-07
ENSG00000066379.10	ZNRD1	30026675	29969596	A	T	0.0470852	rs9261086	Primary	-1.91657	0.253856	4.36318e-14	1.97351e-09
ENSG00000066379.10	ZNRD1	30026675	29969602	C	G	0.0470852	rs9261087	Primary	-1.91657	0.253856	4.36318e-14	1.97351e-09
ENSG00000066379.10	ZNRD1	30026675	29969646	C	T	0.0470852	rs9261088	Primary	-1.91657	0.253856	4.36318e-14	1.97351e-09
ENSG00000066379.10	ZNRD1	30026675	29969818	T	C	0.0470852	rs9261089	Primary	-1.91657	0.253856	4.36318e-14	1.97351e-09
ENSG00000066379.10	ZNRD1	30026675	29969929	C	T	0.0470852	rs9261090	Primary	-1.91657	0.253856	4.36318e-14	1.97351e-09
ENSG00000066379.10	ZNRD1	30026675	29969973	G	T	0.0470852	rs9261091	Primary	-1.91657	0.253856	4.36318e-14	1.97351e-09
ENSG00000066379.10	ZNRD1	30026675	29970685	T	C	0.0470852	rs9261093	Primary	-1.91657	0.253856	4.36318e-14	1.97351e-09
ENSG00000066379.10	ZNRD1	30026675	29970839	T	C	0.0538117	rs9261094	Primary	-1.66135	0.247053	1.76017e-11	7.96142e-07
ENSG00000066379.10	ZNRD1	30026675	29970905	T	TG	0.512332	.	Primary	-0.632283	0.116465	5.66851e-08	0.00256393
ENSG00000066379.10	ZNRD1	30026675	29970927	C	T	0.252242	rs9295826	Primary	0.637577	0.129997	9.36444e-07	0.0423563
ENSG00000066379.10	ZNRD1	30026675	29971014	T	C	0.0470852	rs9261095	Primary	-1.91657	0.253856	4.36318e-14	1.97351e-09
ENSG00000066379.10	ZNRD1	30026675	29971039	T	C	0.0470852	rs9261096	Primary	-1.91657	0.253856	4.36318e-14	1.97351e-09
ENSG00000066379.10	ZNRD1	30026675	29971364	CAG	C	0.0470852	rs9278534	Primary	-1.91657	0.253856	4.36318e-14	1.97351e-09
ENSG00000066379.10	ZNRD1	30026675	29971431	A	G	0.0470852	rs6904969	Primary	-1.91657	0.253856	4.36318e-14	1.97351e-09
ENSG00000066379.10	ZNRD1	30026675	29971913	T	C	0.0470852	rs9261099	Primary	-1.91657	0.253856	4.36318e-14	1.97351e-09
ENSG00000066379.10	ZNRD1	30026675	29972407	T	A	0.0381166	rs9261101	Primary	-1.89622	0.282706	1.9816e-11	8.96299e-07
ENSG00000066379.10	ZNRD1	30026675	29973526	T	C	0.251121	rs9393986	Primary	0.638705	0.130321	9.53421e-07	0.0431242
ENSG00000066379.10	ZNRD1	30026675	29973986	G	GA	0.0470852	rs34422094	Primary	-1.91657	0.253856	4.36318e-14	1.97351e-09
ENSG00000066379.10	ZNRD1	30026675	29973988	C	G	0.0470852	rs371236241	Primary	-1.91657	0.253856	4.36318e-14	1.97351e-09
ENSG00000066379.10	ZNRD1	30026675	29974130	T	C	0.0470852	rs7750714	Primary	-1.91657	0.253856	4.36318e-14	1.97351e-09
ENSG00000066379.10	ZNRD1	30026675	29974154	G	A	0.0470852	rs7768931	Primary	-1.91657	0.253856	4.36318e-14	1.97351e-09
ENSG00000066379.10	ZNRD1	30026675	29974608	C	G	0.0470852	rs9261106	Primary	-1.91657	0.253856	4.36318e-14	1.97351e-09
ENSG00000066379.10	ZNRD1	30026675	29974672	T	G	0.0470852	rs9261107	Primary	-1.91657	0.253856	4.36318e-14	1.97351e-09
ENSG00000066379.10	ZNRD1	30026675	29975049	C	G	0.0470852	rs6939614	Primary	-1.91657	0.253856	4.36318e-14	1.97351e-09
ENSG00000066379.10	ZNRD1	30026675	29975055	A	G	0.0538117	rs6939480	Primary	-1.66135	0.247053	1.76017e-11	7.96142e-07
ENSG00000066379.10	ZNRD1	30026675	29975093	A	T	0.0470852	rs6939616	Primary	-1.91657	0.253856	4.36318e-14	1.97351e-09
ENSG00000066379.10	ZNRD1	30026675	29975095	G	C	0.0470852	rs6940082	Primary	-1.91657	0.253856	4.36318e-14	1.97351e-09
ENSG00000066379.10	ZNRD1	30026675	29975453	C	A	0.51009	rs2240619	Primary	-0.633053	0.115831	4.62137e-08	0.00209029
ENSG00000066379.10	ZNRD1	30026675	29975587	G	A	0.0470852	rs9261108	Primary	-1.91657	0.253856	4.36318e-14	1.97351e-09
ENSG00000066379.10	ZNRD1	30026675	29975834	C	G	0.0470852	rs9261109	Primary	-1.91657	0.253856	4.36318e-14	1.97351e-09
ENSG00000066379.10	ZNRD1	30026675	29976419	TTGGAGCTGTGGTCAC	T	0.0381166	rs199713209	Primary	-1.89622	0.282706	1.9816e-11	8.96299e-07
ENSG00000066379.10	ZNRD1	30026675	29976607	G	A	0.0470852	rs9261112	Primary	-1.91657	0.253856	4.36318e-14	1.97351e-09
ENSG00000066379.10	ZNRD1	30026675	29976789	T	C	0.252242	rs2275855	Primary	0.637577	0.129997	9.36444e-07	0.0423563
ENSG00000066379.10	ZNRD1	30026675	29976857	G	C	0.0470852	rs9261114	Primary	-1.91657	0.253856	4.36318e-14	1.97351e-09
ENSG00000066379.10	ZNRD1	30026675	29977068	G	C	0.0470852	rs2275853	Primary	-1.91657	0.253856	4.36318e-14	1.97351e-09
ENSG00000066379.10	ZNRD1	30026675	29978352	G	A	0.251121	rs4713281	Primary	0.638705	0.130321	9.53421e-07	0.0431242
ENSG00000066379.10	ZNRD1	30026675	29979125	G	A	0.0470852	rs9261118	Primary	-1.91657	0.253856	4.36318e-14	1.97351e-09
ENSG00000066379.10	ZNRD1	30026675	29980073	T	C	0.0470852	rs3734836	Primary	-1.91657	0.253856	4.36318e-14	1.97351e-09
ENSG00000066379.10	ZNRD1	30026675	29980445	G	A	0.0470852	rs9261130	Primary	-1.91657	0.253856	4.36318e-14	1.97351e-09
ENSG00000066379.10	ZNRD1	30026675	29980493	C	T	0.512332	rs3115635	Primary	-0.632283	0.116465	5.66851e-08	0.00256393
ENSG00000066379.10	ZNRD1	30026675	29981063	T	C	0.059417	rs9261132	Primary	-1.2083	0.229007	1.31844e-07	0.00596344
ENSG00000066379.10	ZNRD1	30026675	29981187	T	C	0.0470852	rs9261133	Primary	-1.91657	0.253856	4.36318e-14	1.97351e-09
ENSG00000066379.10	ZNRD1	30026675	29981373	TA	T	0.0470852	rs113202273	Primary	-1.91657	0.253856	4.36318e-14	1.97351e-09
ENSG00000066379.10	ZNRD1	30026675	29981515	C	T	0.0470852	rs9261138	Primary	-1.91657	0.253856	4.36318e-14	1.97351e-09
ENSG00000066379.10	ZNRD1	30026675	29983039	C	T	0.512332	rs6457126	Primary	-0.632283	0.116465	5.66851e-08	0.00256393
ENSG00000066379.10	ZNRD1	30026675	29983327	C	T	0.043722	rs9261141	Primary	-1.87154	0.256816	3.15747e-13	1.42816e-08
ENSG00000066379.10	ZNRD1	30026675	29984252	G	A	0.252242	rs9357092	Primary	0.639998	0.130745	9.83018e-07	0.0444629
ENSG00000066379.10	ZNRD1	30026675	29984769	C	T	0.0751121	rs9261144	Primary	-1.03356	0.214207	1.39958e-06	0.0633045
ENSG00000066379.10	ZNRD1	30026675	29985325	A	G	0.0470852	rs9261146	Primary	-1.91657	0.253856	4.36318e-14	1.97351e-09
ENSG00000066379.10	ZNRD1	30026675	29985488	A	G	0.0538117	rs9261147	Primary	-1.66135	0.247053	1.76017e-11	7.96142e-07
ENSG00000066379.10	ZNRD1	30026675	29985630	A	G	0.251121	rs9348835	Primary	0.638705	0.130321	9.53421e-07	0.0431242
ENSG00000066379.10	ZNRD1	30026675	29987184	G	A	0.252242	rs4711206	Primary	0.637577	0.129997	9.36444e-07	0.0423563
ENSG00000066379.10	ZNRD1	30026675	29987474	C	G	0.511211	rs3869065	Primary	-0.628188	0.116654	7.2428e-08	0.00327599
ENSG00000066379.10	ZNRD1	30026675	29987738	G	A	0.0470852	rs9261151	Primary	-1.91657	0.253856	4.36318e-14	1.97351e-09
ENSG00000066379.10	ZNRD1	30026675	29988439	T	G	0.0470852	rs3891157	Primary	-1.91657	0.253856	4.36318e-14	1.97351e-09
ENSG00000066379.10	ZNRD1	30026675	29988740	G	A	0.0470852	rs3891156	Primary	-1.91657	0.253856	4.36318e-14	1.97351e-09
ENSG00000066379.10	ZNRD1	30026675	29990044	C	A	0.0470852	rs6912454	Primary	-1.91657	0.253856	4.36318e-14	1.97351e-09
ENSG00000066379.10	ZNRD1	30026675	29990938	T	G	0.251121	rs6457127	Primary	0.638705	0.130321	9.53421e-07	0.0431242
ENSG00000066379.10	ZNRD1	30026675	29991538	G	T	0.0470852	rs9261156	Primary	-1.91657	0.253856	4.36318e-14	1.97351e-09
ENSG00000066379.10	ZNRD1	30026675	29991649	A	G	0.0470852	rs6919438	Primary	-1.91657	0.253856	4.36318e-14	1.97351e-09
ENSG00000066379.10	ZNRD1	30026675	29991798	G	A	0.0470852	rs6920254	Primary	-1.91657	0.253856	4.36318e-14	1.97351e-09
ENSG00000066379.10	ZNRD1	30026675	29992286	C	T	0.0470852	rs6925061	Primary	-1.91657	0.253856	4.36318e-14	1.97351e-09
ENSG00000066379.10	ZNRD1	30026675	29992953	C	G	0.0470852	rs9261158	Primary	-1.91657	0.253856	4.36318e-14	1.97351e-09
ENSG00000066379.10	ZNRD1	30026675	29992973	G	A	0.0538117	rs9261159	Primary	-1.66135	0.247053	1.76017e-11	7.96142e-07
ENSG00000066379.10	ZNRD1	30026675	29993086	T	C	0.0470852	rs9261160	Primary	-1.91657	0.253856	4.36318e-14	1.97351e-09
ENSG00000066379.10	ZNRD1	30026675	29994294	G	GA	0.0470852	rs9280850	Primary	-1.91657	0.253856	4.36318e-14	1.97351e-09
ENSG00000066379.10	ZNRD1	30026675	29995664	T	C	0.0470852	rs9261169	Primary	-1.91657	0.253856	4.36318e-14	1.97351e-09
ENSG00000066379.10	ZNRD1	30026675	29996121	A	G	0.0470852	rs9261171	Primary	-1.91657	0.253856	4.36318e-14	1.97351e-09
ENSG00000066379.10	ZNRD1	30026675	29996734	T	A	0.512332	.	Primary	-0.632283	0.116465	5.66851e-08	0.00256393
ENSG00000066379.10	ZNRD1	30026675	29996986	A	C	0.0470852	rs9261175	Primary	-1.91657	0.253856	4.36318e-14	1.97351e-09
ENSG00000066379.10	ZNRD1	30026675	29997312	T	C	0.0470852	rs9261176	Primary	-1.91657	0.253856	4.36318e-14	1.97351e-09
ENSG00000066379.10	ZNRD1	30026675	29997583	T	A	0.0470852	rs9261177	Primary	-1.91657	0.253856	4.36318e-14	1.97351e-09
ENSG00000066379.10	ZNRD1	30026675	29998106	GT	G	0.461883	rs374362541	Primary	-0.597656	0.118681	4.75822e-07	0.0215219
ENSG00000066379.10	ZNRD1	30026675	29998260	C	T	0.0470852	rs9261179	Primary	-1.91657	0.253856	4.36318e-14	1.97351e-09
ENSG00000066379.10	ZNRD1	30026675	29998815	A	AT	0.0975336	rs9280853	Primary	-0.99024	0.176343	1.96077e-08	0.000886874
ENSG00000066379.10	ZNRD1	30026675	29999109	T	C	0.513453	rs3098018	Primary	-0.632253	0.116118	5.18329e-08	0.00234445
ENSG00000066379.10	ZNRD1	30026675	29999185	C	A	0.0426009	rs9261184	Primary	-1.89369	0.261629	4.5508e-13	2.05837e-08
ENSG00000066379.10	ZNRD1	30026675	30000520	C	A	0.512332	rs3094144	Primary	-0.632283	0.116465	5.66851e-08	0.00256393
ENSG00000066379.10	ZNRD1	30026675	30001950	G	A	0.0470852	rs9261191	Primary	-1.91657	0.253856	4.36318e-14	1.97351e-09
ENSG00000066379.10	ZNRD1	30026675	30002173	T	C	0.0470852	rs9261193	Primary	-1.91657	0.253856	4.36318e-14	1.97351e-09
ENSG00000066379.10	ZNRD1	30026675	30002441	C	G	0.512332	rs3121594	Primary	-0.632283	0.116465	5.66851e-08	0.00256393
ENSG00000066379.10	ZNRD1	30026675	30002881	T	C	0.461883	rs166327	Primary	-0.597656	0.118681	4.75822e-07	0.0215219
ENSG00000066379.10	ZNRD1	30026675	30004382	G	GTTGCT	0.0470852	rs9280856	Primary	-1.91657	0.253856	4.36318e-14	1.97351e-09
ENSG00000066379.10	ZNRD1	30026675	30005043	A	G	0.0470852	rs9261203	Primary	-1.91657	0.253856	4.36318e-14	1.97351e-09
ENSG00000066379.10	ZNRD1	30026675	30005754	C	A	0.251121	rs4711207	Primary	0.638705	0.130321	9.53421e-07	0.0431242
ENSG00000066379.10	ZNRD1	30026675	30005761	CAA	C	0.0470852	rs9278546	Primary	-1.91657	0.253856	4.36318e-14	1.97351e-09
ENSG00000066379.10	ZNRD1	30026675	30006482	T	C	0.0470852	rs9261207	Primary	-1.91657	0.253856	4.36318e-14	1.97351e-09
ENSG00000066379.10	ZNRD1	30026675	30006522	C	CACTATCA	0.512332	rs140532428	Primary	-0.632283	0.116465	5.66851e-08	0.00256393
ENSG00000066379.10	ZNRD1	30026675	30006765	G	A	0.251121	rs9405044	Primary	0.638705	0.130321	9.53421e-07	0.0431242
ENSG00000066379.10	ZNRD1	30026675	30008746	A	C	0.251121	rs3910312	Primary	0.638705	0.130321	9.53421e-07	0.0431242
ENSG00000066379.10	ZNRD1	30026675	30009169	C	T	0.251121	rs9393987	Primary	0.638705	0.130321	9.53421e-07	0.0431242
ENSG00000066379.10	ZNRD1	30026675	30009214	T	A	0.0470852	rs9261213	Primary	-1.91657	0.253856	4.36318e-14	1.97351e-09
ENSG00000066379.10	ZNRD1	30026675	30009721	T	TC	0.511211	.	Primary	-0.616158	0.116847	1.34079e-07	0.00606451
ENSG00000066379.10	ZNRD1	30026675	30010080	CAA	C	0.251121	rs10580504	Primary	0.638705	0.130321	9.53421e-07	0.0431242
ENSG00000066379.10	ZNRD1	30026675	30010492	T	C	0.258969	rs9380150	Primary	0.662682	0.129258	2.94665e-07	0.013328
ENSG00000066379.10	ZNRD1	30026675	30011275	G	A	0.0470852	rs9261218	Primary	-1.91657	0.253856	4.36318e-14	1.97351e-09
ENSG00000066379.10	ZNRD1	30026675	30011451	G	A	0.043722	rs9261219	Primary	-1.87154	0.256816	3.15747e-13	1.42816e-08
ENSG00000066379.10	ZNRD1	30026675	30011863	G	T	0.0470852	rs9261220	Primary	-1.91657	0.253856	4.36318e-14	1.97351e-09
ENSG00000066379.10	ZNRD1	30026675	30012654	CTCTTTAAGTATGAAAT	C	0.0470852	rs371793437	Primary	-1.91657	0.253856	4.36318e-14	1.97351e-09
ENSG00000066379.10	ZNRD1	30026675	30013393	C	CT	0.0470852	rs9280859	Primary	-1.91657	0.253856	4.36318e-14	1.97351e-09
ENSG00000066379.10	ZNRD1	30026675	30013772	T	C	0.0470852	rs9261223	Primary	-1.91657	0.253856	4.36318e-14	1.97351e-09
ENSG00000066379.10	ZNRD1	30026675	30014457	C	T	0.0470852	rs9261226	Primary	-1.91657	0.253856	4.36318e-14	1.97351e-09
ENSG00000066379.10	ZNRD1	30026675	30015069	G	A	0.0470852	rs6925856	Primary	-1.91657	0.253856	4.36318e-14	1.97351e-09
ENSG00000066379.10	ZNRD1	30026675	30015502	T	TA	0.0470852	rs9280861	Primary	-1.91657	0.253856	4.36318e-14	1.97351e-09
ENSG00000066379.10	ZNRD1	30026675	30015594	G	T	0.252242	rs7766469	Primary	0.637577	0.129997	9.36444e-07	0.0423563
ENSG00000066379.10	ZNRD1	30026675	30016573	A	G	0.0470852	rs7771476	Primary	-1.91657	0.253856	4.36318e-14	1.97351e-09
ENSG00000066379.10	ZNRD1	30026675	30016676	G	A	0.252242	rs9393988	Primary	0.637577	0.129997	9.36444e-07	0.0423563
ENSG00000066379.10	ZNRD1	30026675	30016694	A	C	0.0470852	rs7771672	Primary	-1.91657	0.253856	4.36318e-14	1.97351e-09
ENSG00000066379.10	ZNRD1	30026675	30016831	C	G	0.0852018	rs6457141	Primary	-0.914613	0.19258	2.04154e-06	0.0923408
ENSG00000066379.10	ZNRD1	30026675	30017629	T	A	0.0470852	rs9261242	Primary	-1.87082	0.254653	2.03393e-13	9.19966e-09
ENSG00000066379.10	ZNRD1	30026675	30017927	C	CA	0.512332	rs9280864	Primary	-0.632283	0.116465	5.66851e-08	0.00256393
ENSG00000066379.10	ZNRD1	30026675	30018015	G	A	0.512332	rs9261244	Primary	-0.632283	0.116465	5.66851e-08	0.00256393
ENSG00000066379.10	ZNRD1	30026675	30018024	T	TA	0.0470852	rs9280865	Primary	-1.91657	0.253856	4.36318e-14	1.97351e-09
ENSG00000066379.10	ZNRD1	30026675	30019515	G	A	0.0470852	rs9261248	Primary	-1.91657	0.253856	4.36318e-14	1.97351e-09
ENSG00000066379.10	ZNRD1	30026675	30019561	C	A	0.0470852	rs201388676	Primary	-1.91657	0.253856	4.36318e-14	1.97351e-09
ENSG00000066379.10	ZNRD1	30026675	30019589	A	ACACACC	0.0257848	.	Primary	-1.62254	0.341016	1.95555e-06	0.0884514
ENSG00000066379.10	ZNRD1	30026675	30019589	A	ACACACACC	0.014574	.	Primary	-2.49027	0.463543	7.77628e-08	0.00351729
ENSG00000066379.10	ZNRD1	30026675	30019654	T	C	0.0470852	rs9261250	Primary	-1.91657	0.253856	4.36318e-14	1.97351e-09
ENSG00000066379.10	ZNRD1	30026675	30019769	T	A	0.0852018	rs9261251	Primary	-0.914613	0.19258	2.04154e-06	0.0923408
ENSG00000066379.10	ZNRD1	30026675	30020642	T	G	0.0470852	rs9261253	Primary	-1.91657	0.253856	4.36318e-14	1.97351e-09
ENSG00000066379.10	ZNRD1	30026675	30021201	A	T	0.0852018	rs9261254	Primary	-0.914613	0.19258	2.04154e-06	0.0923408
ENSG00000066379.10	ZNRD1	30026675	30021413	G	A	0.0852018	rs9261255	Primary	-0.914613	0.19258	2.04154e-06	0.0923408
ENSG00000066379.10	ZNRD1	30026675	30022202	T	TA	0.0470852	rs113615170	Primary	-1.91657	0.253856	4.36318e-14	1.97351e-09
ENSG00000066379.10	ZNRD1	30026675	30022203	T	G	0.0470852	rs9256991	Primary	-1.91657	0.253856	4.36318e-14	1.97351e-09
ENSG00000066379.10	ZNRD1	30026675	30022425	G	A	0.0470852	rs9261257	Primary	-1.91657	0.253856	4.36318e-14	1.97351e-09
ENSG00000066379.10	ZNRD1	30026675	30024749	C	G	0.0470852	rs9261263	Primary	-1.91657	0.253856	4.36318e-14	1.97351e-09
ENSG00000066379.10	ZNRD1	30026675	30025210	T	C	0.0470852	rs9261264	Primary	-1.91657	0.253856	4.36318e-14	1.97351e-09
ENSG00000066379.10	ZNRD1	30026675	30025984	G	C	0.0852018	rs6917477	Primary	-0.914613	0.19258	2.04154e-06	0.0923408
ENSG00000066379.10	ZNRD1	30026675	30026350	T	C	0.0470852	rs9261265	Primary	-1.91657	0.253856	4.36318e-14	1.97351e-09
ENSG00000066379.10	ZNRD1	30026675	30028477	T	C	0.0470852	rs3757332	Primary	-1.91657	0.253856	4.36318e-14	1.97351e-09
ENSG00000066379.10	ZNRD1	30026675	30028800	A	G	0.251121	rs9295829	Primary	0.638705	0.130321	9.53421e-07	0.0431242
ENSG00000066379.10	ZNRD1	30026675	30028807	A	C	0.0852018	rs7769930	Primary	-0.914613	0.19258	2.04154e-06	0.0923408
ENSG00000066379.10	ZNRD1	30026675	30028871	C	T	0.0852018	rs7770092	Primary	-0.914613	0.19258	2.04154e-06	0.0923408
ENSG00000066379.10	ZNRD1	30026675	30028913	G	A	0.0470852	rs7770505	Primary	-1.91657	0.253856	4.36318e-14	1.97351e-09
ENSG00000066379.10	ZNRD1	30026675	30029109	C	G	0.0852018	rs7770557	Primary	-0.914613	0.19258	2.04154e-06	0.0923408
ENSG00000066379.10	ZNRD1	30026675	30029172	A	AG	0.0470852	rs9280878	Primary	-1.91657	0.253856	4.36318e-14	1.97351e-09
ENSG00000066379.10	ZNRD1	30026675	30030057	G	A	0.0470852	rs10745	Primary	-1.91657	0.253856	4.36318e-14	1.97351e-09
ENSG00000066379.10	ZNRD1	30026675	30030135	G	A	0.0470852	rs9261270	Primary	-1.91657	0.253856	4.36318e-14	1.97351e-09
ENSG00000066379.10	ZNRD1	30026675	30030189	T	A	0.0470852	rs9261271	Primary	-1.91657	0.253856	4.36318e-14	1.97351e-09
ENSG00000066379.10	ZNRD1	30026675	30030641	G	A	0.043722	rs9261273	Primary	-1.87154	0.256816	3.15747e-13	1.42816e-08
ENSG00000066379.10	ZNRD1	30026675	30030927	A	ATT	0.0470852	rs138940267	Primary	-1.91657	0.253856	4.36318e-14	1.97351e-09
ENSG00000066379.10	ZNRD1	30026675	30031059	C	T	0.0470852	rs9261276	Primary	-1.91657	0.253856	4.36318e-14	1.97351e-09
ENSG00000066379.10	ZNRD1	30026675	30031345	T	C	0.440583	rs1150739	Primary	-0.777786	0.117618	3.77118e-11	1.70574e-06
ENSG00000066379.10	ZNRD1	30026675	30032097	AAAG	A	0.0470852	rs144856153	Primary	-1.91657	0.253856	4.36318e-14	1.97351e-09
ENSG00000066379.10	ZNRD1	30026675	30033690	G	T	0.0470852	rs3807030	Primary	-1.91657	0.253856	4.36318e-14	1.97351e-09
ENSG00000066379.10	ZNRD1	30026675	30034343	TGTTA	T	0.0470852	rs370725085	Primary	-1.91657	0.253856	4.36318e-14	1.97351e-09
ENSG00000066379.10	ZNRD1	30026675	30035457	T	G	0.0852018	rs9261282	Primary	-0.914613	0.19258	2.04154e-06	0.0923408
ENSG00000066379.10	ZNRD1	30026675	30035805	T	A	0.0470852	rs9261284	Primary	-1.91657	0.253856	4.36318e-14	1.97351e-09
ENSG00000066379.10	ZNRD1	30026675	30036083	C	A	0.0470852	rs9261285	Primary	-1.91657	0.253856	4.36318e-14	1.97351e-09
ENSG00000066379.10	ZNRD1	30026675	30036269	A	G	0.0470852	rs9261286	Primary	-1.91657	0.253856	4.36318e-14	1.97351e-09
ENSG00000066379.10	ZNRD1	30026675	30036570	A	G	0.0470852	rs9261287	Primary	-1.91657	0.253856	4.36318e-14	1.97351e-09
ENSG00000066379.10	ZNRD1	30026675	30037659	C	T	0.043722	rs2240067	Primary	-1.87154	0.256816	3.15747e-13	1.42816e-08
ENSG00000066379.10	ZNRD1	30026675	30037908	A	T	0.0515695	rs1051133	Primary	-1.70946	0.24476	2.8646e-12	1.29569e-07
ENSG00000066379.10	ZNRD1	30026675	30038366	AG	A	0.0470852	rs111785008	Primary	-1.91657	0.253856	4.36318e-14	1.97351e-09
ENSG00000066379.10	ZNRD1	30026675	30039418	C	T	0.043722	rs2301752	Primary	-1.87154	0.256816	3.15747e-13	1.42816e-08
ENSG00000066379.10	ZNRD1	30026675	30039484	C	T	0.0470852	rs2301751	Primary	-1.91657	0.253856	4.36318e-14	1.97351e-09
ENSG00000066379.10	ZNRD1	30026675	30039752	T	A	0.0470852	rs9261296	Primary	-1.91657	0.253856	4.36318e-14	1.97351e-09
ENSG00000066379.10	ZNRD1	30026675	30040084	G	A	0.252242	rs9393989	Primary	0.637577	0.129997	9.36444e-07	0.0423563
ENSG00000066379.10	ZNRD1	30026675	30040291	C	T	0.251121	rs10947050	Primary	0.638705	0.130321	9.53421e-07	0.0431242
ENSG00000066379.10	ZNRD1	30026675	30040603	G	A	0.251121	rs12200084	Primary	0.638705	0.130321	9.53421e-07	0.0431242
ENSG00000066379.10	ZNRD1	30026675	30042668	T	C	0.0470852	rs9261303	Primary	-1.91657	0.253856	4.36318e-14	1.97351e-09
ENSG00000066379.10	ZNRD1	30026675	30043171	G	C	0.0470852	rs9261304	Primary	-1.91657	0.253856	4.36318e-14	1.97351e-09
ENSG00000066379.10	ZNRD1	30026675	30043764	C	T	0.0482063	rs9261305	Primary	-1.82545	0.251812	4.19109e-13	1.89567e-08
ENSG00000066379.10	ZNRD1	30026675	30043971	TTGA	T	0.0470852	rs375934146	Primary	-1.91657	0.253856	4.36318e-14	1.97351e-09
ENSG00000066379.10	ZNRD1	30026675	30044914	G	A	0.0470852	rs3807036	Primary	-1.91657	0.253856	4.36318e-14	1.97351e-09
ENSG00000066379.10	ZNRD1	30026675	30046540	T	C	0.0470852	rs9261312	Primary	-1.91657	0.253856	4.36318e-14	1.97351e-09
ENSG00000066379.10	ZNRD1	30026675	30046752	C	A	0.0470852	rs9261313	Primary	-1.91657	0.253856	4.36318e-14	1.97351e-09
ENSG00000066379.10	ZNRD1	30026675	30046983	A	T	0.0470852	rs9261314	Primary	-1.91657	0.253856	4.36318e-14	1.97351e-09
ENSG00000066379.10	ZNRD1	30026675	30047403	G	A	0.251121	rs4711209	Primary	0.638705	0.130321	9.53421e-07	0.0431242
ENSG00000066379.10	ZNRD1	30026675	30047503	G	T	0.0470852	rs9261315	Primary	-1.91657	0.253856	4.36318e-14	1.97351e-09
ENSG00000066379.10	ZNRD1	30026675	30047837	G	A	0.0470852	rs9261316	Primary	-1.91657	0.253856	4.36318e-14	1.97351e-09
ENSG00000066379.10	ZNRD1	30026675	30048305	A	T	0.0470852	rs9261317	Primary	-1.91657	0.253856	4.36318e-14	1.97351e-09
ENSG00000066379.10	ZNRD1	30026675	30054746	G	A	0.0470852	rs9261359	Primary	-1.91657	0.253856	4.36318e-14	1.97351e-09
ENSG00000066379.10	ZNRD1	30026675	30055667	C	T	0.0470852	rs9261360	Primary	-1.91657	0.253856	4.36318e-14	1.97351e-09
ENSG00000066379.10	ZNRD1	30026675	30056177	A	G	0.0459641	rs9261362	Primary	-1.89268	0.254811	1.10467e-13	4.99654e-09
ENSG00000066379.10	ZNRD1	30026675	30056985	A	G	0.0470852	rs9261364	Primary	-1.91657	0.253856	4.36318e-14	1.97351e-09
ENSG00000066379.10	ZNRD1	30026675	30057675	C	T	0.0470852	rs9261365	Primary	-1.91657	0.253856	4.36318e-14	1.97351e-09
ENSG00000066379.10	ZNRD1	30026675	30058241	T	A	0.0470852	rs9261367	Primary	-1.91657	0.253856	4.36318e-14	1.97351e-09
ENSG00000066379.10	ZNRD1	30026675	30058605	G	A	0.0470852	rs9261369	Primary	-1.91657	0.253856	4.36318e-14	1.97351e-09
ENSG00000066379.10	ZNRD1	30026675	30059055	C	G	0.0470852	rs9261372	Primary	-1.91657	0.253856	4.36318e-14	1.97351e-09
ENSG00000066379.10	ZNRD1	30026675	30059273	T	C	0.0470852	rs77627704	Primary	-1.91657	0.253856	4.36318e-14	1.97351e-09
ENSG00000066379.10	ZNRD1	30026675	30059451	A	G	0.0470852	rs76702759	Primary	-1.91657	0.253856	4.36318e-14	1.97351e-09
ENSG00000066379.10	ZNRD1	30026675	30059819	T	C	0.0470852	rs9261377	Primary	-1.91657	0.253856	4.36318e-14	1.97351e-09
ENSG00000066379.10	ZNRD1	30026675	30059888	C	T	0.0470852	rs9261379	Primary	-1.91657	0.253856	4.36318e-14	1.97351e-09
ENSG00000066379.10	ZNRD1	30026675	30060002	G	A	0.0470852	rs9261381	Primary	-1.91657	0.253856	4.36318e-14	1.97351e-09
ENSG00000066379.10	ZNRD1	30026675	30060254	C	T	0.0470852	rs2158289	Primary	-1.91657	0.253856	4.36318e-14	1.97351e-09
ENSG00000066379.10	ZNRD1	30026675	30060255	G	T	0.0470852	rs2158288	Primary	-1.91657	0.253856	4.36318e-14	1.97351e-09
ENSG00000066379.10	ZNRD1	30026675	30061047	CA	C	0.0470852	rs368834955	Primary	-1.91657	0.253856	4.36318e-14	1.97351e-09
ENSG00000066379.10	ZNRD1	30026675	30061293	G	A	0.0470852	rs9261386	Primary	-1.91657	0.253856	4.36318e-14	1.97351e-09
ENSG00000066379.10	ZNRD1	30026675	30062058	G	A	0.0470852	rs6923832	Primary	-1.91657	0.253856	4.36318e-14	1.97351e-09
ENSG00000066379.10	ZNRD1	30026675	30065319	G	A	0.329596	rs1264704	Primary	-0.606767	0.123946	9.81091e-07	0.0443757
ENSG00000066379.10	ZNRD1	30026675	30069525	G	T	0.0381166	rs9261403	Primary	-1.89622	0.282706	1.9816e-11	8.96299e-07
ENSG00000066379.10	ZNRD1	30026675	30074163	G	A	0.247758	rs2517600	Primary	-0.761196	0.136613	2.51955e-08	0.00113962
ENSG00000066379.10	ZNRD1	30026675	30391975	A	T	0.309417	rs3130127	Primary	-0.629304	0.121729	2.34429e-07	0.0106035
ENSG00000066379.10	ZNRD1	30026675	30952361	C	A	0.154709	rs9348845	Primary	0.763667	0.160527	1.96254e-06	0.0887675
ENSG00000137310.7	TCF19	31126318	31059462	G	A	0.859865	rs2535298	Primary	-0.756217	0.14887	3.77988e-07	0.0170968
ENSG00000137310.7	TCF19	31126318	31073597	C	G	0.860987	rs2517494	Primary	-0.732406	0.149751	1.00417e-06	0.0454197
ENSG00000137310.7	TCF19	31126318	31073777	A	ATAT	0.860987	.	Primary	-0.732406	0.149751	1.00417e-06	0.0454197
ENSG00000137310.7	TCF19	31126318	31107087	T	C	0.71861	rs3094663	Primary	-0.658209	0.113257	6.18715e-09	0.000279851
ENSG00000137310.7	TCF19	31126318	31107245	A	G	0.71861	rs3130464	Primary	-0.658209	0.113257	6.18715e-09	0.000279851
ENSG00000137310.7	TCF19	31126318	31107258	T	C	0.71861	rs2285803	Primary	-0.658209	0.113257	6.18715e-09	0.000279851
ENSG00000137310.7	TCF19	31126318	31107904	C	G	0.827354	rs2233942	Primary	-0.853171	0.129231	4.05882e-11	1.83584e-06
ENSG00000137310.7	TCF19	31126318	31108485	G	A	0.716368	rs3130454	Primary	-0.663075	0.113492	5.14233e-09	0.000232593
ENSG00000137310.7	TCF19	31126318	31109943	A	G	0.828475	rs3132540	Primary	-0.835813	0.129654	1.14466e-10	5.1774e-06
ENSG00000137310.7	TCF19	31126318	31111180	T	C	0.716368	rs130073	Primary	-0.663075	0.113492	5.14233e-09	0.000232593
ENSG00000137310.7	TCF19	31126318	31111625	T	C	0.827354	rs3131011	Primary	-0.853171	0.129231	4.05882e-11	1.83584e-06
ENSG00000137310.7	TCF19	31126318	31112899	C	T	0.773543	rs3094226	Primary	-0.721079	0.116671	6.39211e-10	2.89121e-05
ENSG00000137310.7	TCF19	31126318	31112925	C	T	0.773543	rs2073719	Primary	-0.721079	0.116671	6.39211e-10	2.89121e-05
ENSG00000137310.7	TCF19	31126318	31113030	A	G	0.827354	rs3132539	Primary	-0.853171	0.129231	4.05882e-11	1.83584e-06
ENSG00000137310.7	TCF19	31126318	31113052	G	A	0.756726	rs3094225	Primary	-0.629562	0.115444	4.94155e-08	0.00223511
ENSG00000137310.7	TCF19	31126318	31113106	A	G	0.773543	rs3130575	Primary	-0.721079	0.116671	6.39211e-10	2.89121e-05
ENSG00000137310.7	TCF19	31126318	31113275	A	G	0.616592	rs886401	Primary	-0.594268	0.109269	5.37027e-08	0.00242903
ENSG00000137310.7	TCF19	31126318	31113276	G	A	0.616592	.	Primary	-0.594268	0.109269	5.37027e-08	0.00242903
ENSG00000137310.7	TCF19	31126318	31113842	A	G	0.828475	rs3132538	Primary	-0.835813	0.129654	1.14466e-10	5.1774e-06
ENSG00000137310.7	TCF19	31126318	31114019	A	G	0.716368	rs3132537	Primary	-0.663075	0.113492	5.14233e-09	0.000232593
ENSG00000137310.7	TCF19	31126318	31114449	C	T	0.818386	rs2240065	Primary	-0.87303	0.127591	7.78799e-12	3.52259e-07
ENSG00000137310.7	TCF19	31126318	31114762	A	G	0.827354	rs2240062	Primary	-0.853171	0.129231	4.05882e-11	1.83584e-06
ENSG00000137310.7	TCF19	31126318	31114900	A	G	0.716368	rs2240060	Primary	-0.663075	0.113492	5.14233e-09	0.000232593
ENSG00000137310.7	TCF19	31126318	31115604	T	C	0.716368	rs3131013	Primary	-0.663075	0.113492	5.14233e-09	0.000232593
ENSG00000137310.7	TCF19	31126318	31115874	A	G	0.716368	rs9263758	Primary	-0.663075	0.113492	5.14233e-09	0.000232593
ENSG00000137310.7	TCF19	31126318	31116526	A	G	0.706278	rs3132535	Primary	-0.616573	0.109772	1.94464e-08	0.00087958
ENSG00000137310.7	TCF19	31126318	31116739	A	G	0.827354	rs9263761	Primary	-0.853171	0.129231	4.05882e-11	1.83584e-06
ENSG00000137310.7	TCF19	31126318	31117053	A	G	0.763453	rs2022084	Primary	-0.703682	0.115491	1.10847e-09	5.01372e-05
ENSG00000137310.7	TCF19	31126318	31117378	A	C	0.818386	rs3094227	Primary	-0.87303	0.127591	7.78799e-12	3.52259e-07
ENSG00000137310.7	TCF19	31126318	31117619	T	C	0.763453	rs3130498	Primary	-0.703682	0.115491	1.10847e-09	5.01372e-05
ENSG00000137310.7	TCF19	31126318	31118565	C	G	0.763453	rs130078	Primary	-0.703682	0.115491	1.10847e-09	5.01372e-05
ENSG00000137310.7	TCF19	31126318	31119889	T	C	0.763453	rs3130499	Primary	-0.703682	0.115491	1.10847e-09	5.01372e-05
ENSG00000137310.7	TCF19	31126318	31119976	T	A	0.76009	rs3130500	Primary	-0.720477	0.114995	3.7214e-10	1.68322e-05
ENSG00000137310.7	TCF19	31126318	31119997	G	T	0.758969	rs3130446	Primary	-0.710081	0.115102	6.86584e-10	3.10549e-05
ENSG00000137310.7	TCF19	31126318	31120614	C	T	0.762332	rs2240059	Primary	-0.725011	0.115235	3.1426e-10	1.42143e-05
ENSG00000137310.7	TCF19	31126318	31121513	C	T	0.761211	rs3130450	Primary	-0.706257	0.11541	9.38254e-10	4.24382e-05
ENSG00000137310.7	TCF19	31126318	31123242	A	G	0.763453	rs3130451	Primary	-0.703682	0.115491	1.10847e-09	5.01372e-05
ENSG00000137310.7	TCF19	31126318	31123313	A	G	0.761211	rs3130452	Primary	-0.704803	0.1144	7.23539e-10	3.27264e-05
ENSG00000137310.7	TCF19	31126318	31128259	A	G	0.820628	rs9263788	Primary	-0.788791	0.129935	1.27368e-09	5.761e-05
ENSG00000137310.7	TCF19	31126318	31128552	A	C	0.680493	rs3130934	Primary	-0.682996	0.117457	6.06813e-09	0.000274468
ENSG00000137310.7	TCF19	31126318	31129616	A	G	0.774664	rs2073721	Primary	-0.774559	0.118405	6.08659e-11	2.75302e-06
ENSG00000137310.7	TCF19	31126318	31130078	T	C	0.774664	rs2073723	Primary	-0.774559	0.118405	6.08659e-11	2.75302e-06
ENSG00000137310.7	TCF19	31126318	31130502	T	C	0.773543	rs1065461	Primary	-0.790866	0.117954	2.01574e-11	9.11741e-07
ENSG00000137310.7	TCF19	31126318	31131569	C	T	0.774664	rs3132528	Primary	-0.774559	0.118405	6.08659e-11	2.75302e-06
ENSG00000137310.7	TCF19	31126318	31131603	G	GT	0.770179	rs201940759	Primary	-0.763074	0.118872	1.36925e-10	6.19325e-06
ENSG00000137310.7	TCF19	31126318	31131609	A	T	0.770179	.	Primary	-0.763074	0.118872	1.36925e-10	6.19325e-06
ENSG00000137310.7	TCF19	31126318	31131611	A	C	0.770179	.	Primary	-0.763074	0.118872	1.36925e-10	6.19325e-06
ENSG00000137310.7	TCF19	31126318	31132649	A	C	0.679372	rs2394882	Primary	-0.706395	0.117308	1.72585e-09	7.8062e-05
ENSG00000137310.7	TCF19	31126318	31132689	T	TGA	0.679372	.	Primary	-0.706395	0.117308	1.72585e-09	7.8062e-05
ENSG00000137310.7	TCF19	31126318	31133509	G	A	0.679372	rs2106074	Primary	-0.706395	0.117308	1.72585e-09	7.8062e-05
ENSG00000137310.7	TCF19	31126318	31133577	A	AAAGCCC	0.658072	rs145919884	Primary	-0.619289	0.113879	5.38366e-08	0.00243508
ENSG00000137310.7	TCF19	31126318	31133620	T	TAG	0.679372	.	Primary	-0.706395	0.117308	1.72585e-09	7.8062e-05
ENSG00000137310.7	TCF19	31126318	31133943	C	A	0.679372	rs3130932	Primary	-0.706395	0.117308	1.72585e-09	7.8062e-05
ENSG00000137310.7	TCF19	31126318	31134118	C	CGAG	0.762332	.	Primary	-0.605434	0.120488	5.03822e-07	0.0227884
ENSG00000137310.7	TCF19	31126318	31134439	GAA	GA	0.642377	.	Primary	-0.637241	0.121967	1.7443e-07	0.00788964
ENSG00000137310.7	TCF19	31126318	31134888	T	C	0.709641	rs3130931	Primary	-0.589004	0.108421	5.55471e-08	0.00251245
ENSG00000137310.7	TCF19	31126318	31135172	T	A	0.673767	rs3130930	Primary	-0.699961	0.117841	2.85247e-09	0.00012902
ENSG00000137310.7	TCF19	31126318	31135207	T	C	0.770179	rs3130929	Primary	-0.771664	0.117585	5.28803e-11	2.39183e-06
ENSG00000137310.7	TCF19	31126318	31135706	C	T	0.773543	rs9263804	Primary	-0.796036	0.118021	1.53195e-11	6.92917e-07
ENSG00000137310.7	TCF19	31126318	31135735	A	C	0.772422	rs9263805	Primary	-0.808866	0.117701	6.32228e-12	2.85963e-07
ENSG00000137310.7	TCF19	31126318	31136097	C	A	0.773543	rs3130928	Primary	-0.796036	0.118021	1.53195e-11	6.92917e-07
ENSG00000137310.7	TCF19	31126318	31136240	G	A	0.692825	rs3094194	Primary	-0.586824	0.11515	3.46607e-07	0.0156774
ENSG00000137310.7	TCF19	31126318	31136453	A	G	0.774664	rs3130501	Primary	-0.774559	0.118405	6.08659e-11	2.75302e-06
ENSG00000137310.7	TCF19	31126318	31136666	A	G	0.773543	rs3130502	Primary	-0.796036	0.118021	1.53195e-11	6.92917e-07
ENSG00000137310.7	TCF19	31126318	31136714	T	C	0.773543	rs3132524	Primary	-0.796036	0.118021	1.53195e-11	6.92917e-07
ENSG00000137310.7	TCF19	31126318	31136832	T	C	0.773543	rs3132523	Primary	-0.796036	0.118021	1.53195e-11	6.92917e-07
ENSG00000137310.7	TCF19	31126318	31137165	A	G	0.818386	rs3130503	Primary	-0.87303	0.127591	7.78799e-12	3.52259e-07
ENSG00000137310.7	TCF19	31126318	31137759	T	C	0.774664	rs3132522	Primary	-0.774559	0.118405	6.08659e-11	2.75302e-06
ENSG00000137310.7	TCF19	31126318	31137804	C	G	0.774664	rs3094192	Primary	-0.774559	0.118405	6.08659e-11	2.75302e-06
ENSG00000137310.7	TCF19	31126318	31137837	A	T	0.774664	rs3130504	Primary	-0.774559	0.118405	6.08659e-11	2.75302e-06
ENSG00000137310.7	TCF19	31126318	31141209	A	G	0.763453	rs2269712	Primary	-0.723927	0.119539	1.39563e-09	6.31256e-05
ENSG00000137310.7	TCF19	31126318	31141836	C	T	0.827354	rs3132517	Primary	-0.826645	0.128177	1.1241e-10	5.08441e-06
ENSG00000137310.7	TCF19	31126318	31144695	T	C	0.875561	rs3134789	Primary	-0.796637	0.145091	4.00596e-08	0.00181194
ENSG00000137310.7	TCF19	31126318	31147081	C	T	0.875561	rs3131017	Primary	-0.796637	0.145091	4.00596e-08	0.00181194
ENSG00000137310.7	TCF19	31126318	31150618	G	A	0.877803	rs3130509	Primary	-0.799356	0.145573	3.9943e-08	0.00180666
ENSG00000137310.7	TCF19	31126318	31156606	A	C	0.875561	rs4343960	Primary	-0.796637	0.145091	4.00596e-08	0.00181194
ENSG00000137310.7	TCF19	31126318	31160188	A	G	0.876682	rs3130460	Primary	-0.788162	0.145428	5.97305e-08	0.00270167
ENSG00000137310.7	TCF19	31126318	31161210	T	G	0.875561	rs3095238	Primary	-0.796637	0.145091	4.00596e-08	0.00181194
ENSG00000137310.7	TCF19	31126318	31161347	A	G	0.877803	rs3095237	Primary	-0.799356	0.145573	3.9943e-08	0.00180666
ENSG00000137310.7	TCF19	31126318	31164700	G	A	0.877803	rs3130461	Primary	-0.799356	0.145573	3.9943e-08	0.00180666
ENSG00000137310.7	TCF19	31126318	31165150	G	C	0.877803	rs3094610	Primary	-0.799356	0.145573	3.9943e-08	0.00180666
ENSG00000137310.7	TCF19	31126318	31165277	A	G	0.875561	rs3130462	Primary	-0.796637	0.145091	4.00596e-08	0.00181194
ENSG00000137310.7	TCF19	31126318	31165566	T	C	0.877803	rs3094609	Primary	-0.799356	0.145573	3.9943e-08	0.00180666
ENSG00000137310.7	TCF19	31126318	31165962	G	A	0.875561	rs3130463	Primary	-0.796637	0.145091	4.00596e-08	0.00181194
ENSG00000137310.7	TCF19	31126318	31166683	G	A	0.875561	rs3094608	Primary	-0.796637	0.145091	4.00596e-08	0.00181194
ENSG00000137310.7	TCF19	31126318	31169539	A	G	0.877803	rs3094607	Primary	-0.820301	0.146459	2.13271e-08	0.000964648
ENSG00000137310.7	TCF19	31126318	31170020	G	C	0.882287	rs3132511	Primary	-0.840263	0.147042	1.10066e-08	0.00049784
ENSG00000137310.7	TCF19	31126318	31173678	A	G	0.876682	rs3094606	Primary	-0.816083	0.142412	1.00161e-08	0.00045304
ENSG00000137310.7	TCF19	31126318	31174521	T	C	0.877803	rs3132509	Primary	-0.851767	0.142133	2.0634e-09	9.33299e-05
ENSG00000137310.7	TCF19	31126318	31174796	G	T	0.878924	rs3132508	Primary	-0.847454	0.142483	2.7186e-09	0.000122965
ENSG00000137310.7	TCF19	31126318	31175613	A	C	0.876682	rs3132507	Primary	-0.835595	0.140223	2.53733e-09	0.000114766
ENSG00000137310.7	TCF19	31126318	31177915	G	A	0.878924	rs3130952	Primary	-0.847454	0.142483	2.7186e-09	0.000122965
ENSG00000137310.7	TCF19	31126318	31178000	A	G	0.878924	rs3130512	Primary	-0.847454	0.142483	2.7186e-09	0.000122965
ENSG00000137310.7	TCF19	31126318	31178743	T	G	0.878924	rs3132504	Primary	-0.847454	0.142483	2.7186e-09	0.000122965
ENSG00000137310.7	TCF19	31126318	31179006	A	T	0.878924	rs3132503	Primary	-0.847454	0.142483	2.7186e-09	0.000122965
ENSG00000137310.7	TCF19	31126318	31179932	G	C	0.877803	rs3130466	Primary	-0.853277	0.142333	2.03549e-09	9.20672e-05
ENSG00000137310.7	TCF19	31126318	31185977	T	G	0.878924	rs3132501	Primary	-0.847454	0.142483	2.7186e-09	0.000122965
ENSG00000137310.7	TCF19	31126318	31186868	T	C	0.878924	rs3130951	Primary	-0.847454	0.142483	2.7186e-09	0.000122965
ENSG00000137310.7	TCF19	31126318	31189952	C	G	0.884529	rs3130950	Primary	-0.843187	0.147528	1.09434e-08	0.000494979
ENSG00000137310.7	TCF19	31126318	31190795	C	G	0.884529	rs3130468	Primary	-0.843187	0.147528	1.09434e-08	0.000494979
ENSG00000137310.7	TCF19	31126318	31191709	T	C	0.884529	rs3130518	Primary	-0.843187	0.147528	1.09434e-08	0.000494979
ENSG00000137310.7	TCF19	31126318	31192064	A	AC	0.883408	rs9281268	Primary	-0.830015	0.147657	1.89593e-08	0.000857549
ENSG00000137310.7	TCF19	31126318	31194747	G	A	0.883408	rs3095252	Primary	-0.854933	0.146958	5.97182e-09	0.000270111
ENSG00000137310.7	TCF19	31126318	31195120	T	C	0.874439	rs3130520	Primary	-0.786842	0.142957	3.71143e-08	0.00167872
ENSG00000137310.7	TCF19	31126318	31195828	A	G	0.873318	rs9264024	Primary	-0.802735	0.142153	1.6328e-08	0.00073853
ENSG00000137310.7	TCF19	31126318	31197514	C	G	0.874439	rs3130941	Primary	-0.786842	0.142957	3.71143e-08	0.00167872
ENSG00000137310.7	TCF19	31126318	31197633	G	A	0.874439	rs3134782	Primary	-0.786842	0.142957	3.71143e-08	0.00167872
ENSG00000137310.7	TCF19	31126318	31199460	T	C	0.884529	rs3130528	Primary	-0.843187	0.147528	1.09434e-08	0.000494979
ENSG00000137310.7	TCF19	31126318	31207920	C	T	0.884529	rs3132499	Primary	-0.843187	0.147528	1.09434e-08	0.000494979
ENSG00000137310.7	TCF19	31126318	31208453	A	G	0.884529	rs3130532	Primary	-0.843187	0.147528	1.09434e-08	0.000494979
ENSG00000137310.7	TCF19	31126318	31213453	G	A	0.884529	rs75899922	Primary	-0.843187	0.147528	1.09434e-08	0.000494979
ENSG00000137310.7	TCF19	31126318	31213879	T	C	0.884529	rs3095246	Primary	-0.843187	0.147528	1.09434e-08	0.000494979
ENSG00000137310.7	TCF19	31126318	31216672	T	A	0.884529	rs3130415	Primary	-0.843187	0.147528	1.09434e-08	0.000494979
ENSG00000137310.7	TCF19	31126318	31217479	A	G	0.884529	rs3134753	Primary	-0.843187	0.147528	1.09434e-08	0.000494979
ENSG00000137310.7	TCF19	31126318	31218034	G	A	0.884529	rs75076268	Primary	-0.843187	0.147528	1.09434e-08	0.000494979
ENSG00000137310.7	TCF19	31126318	31218535	A	C	0.884529	rs3130426	Primary	-0.843187	0.147528	1.09434e-08	0.000494979
ENSG00000137310.7	TCF19	31126318	31219090	G	A	0.884529	rs3130428	Primary	-0.843187	0.147528	1.09434e-08	0.000494979
ENSG00000137310.7	TCF19	31126318	31220421	C	T	0.884529	rs3134748	Primary	-0.843187	0.147528	1.09434e-08	0.000494979
ENSG00000137310.7	TCF19	31126318	31221573	A	G	0.843049	rs3095256	Primary	-0.674882	0.129855	2.02303e-07	0.00915038
ENSG00000137310.7	TCF19	31126318	31222119	G	A	0.827354	rs9264227	Primary	-0.600157	0.124797	1.5165e-06	0.0685926
ENSG00000137310.7	TCF19	31126318	31222516	G	C	0.825112	rs79093165	Primary	-0.6222	0.124151	5.39641e-07	0.0244085
ENSG00000137310.7	TCF19	31126318	31222524	G	T	0.825112	rs9264240	Primary	-0.6222	0.124151	5.39641e-07	0.0244085
ENSG00000137310.7	TCF19	31126318	31222551	C	T	0.830717	rs9264241	Primary	-0.625993	0.126199	7.03629e-07	0.0318258
ENSG00000137310.7	TCF19	31126318	31222584	T	C	0.884529	rs9264242	Primary	-0.843187	0.147528	1.09434e-08	0.000494979
ENSG00000137310.7	TCF19	31126318	31222607	A	G	0.830717	rs9264243	Primary	-0.625993	0.126199	7.03629e-07	0.0318258
ENSG00000137310.7	TCF19	31126318	31222610	G	A	0.827354	rs9264244	Primary	-0.600157	0.124797	1.5165e-06	0.0685926
ENSG00000137310.7	TCF19	31126318	31227457	T	C	0.827354	rs9264333	Primary	-0.600157	0.124797	1.5165e-06	0.0685926
ENSG00000137310.7	TCF19	31126318	31227475	T	C	0.829596	rs9264334	Primary	-0.62137	0.126236	8.55436e-07	0.0386922
ENSG00000137310.7	TCF19	31126318	31227494	C	A	0.826233	rs9264335	Primary	-0.595711	0.124838	1.82526e-06	0.0825584
ENSG00000137310.7	TCF19	31126318	31227506	A	G	0.826233	rs9264337	Primary	-0.595711	0.124838	1.82526e-06	0.0825584
ENSG00000137310.7	TCF19	31126318	31227577	C	T	0.826233	rs9264338	Primary	-0.595711	0.124838	1.82526e-06	0.0825584
ENSG00000137310.7	TCF19	31126318	31227588	G	T	0.827354	rs9264339	Primary	-0.600157	0.124797	1.5165e-06	0.0685926
ENSG00000137310.7	TCF19	31126318	31227713	G	T	0.830717	rs9264341	Primary	-0.625993	0.126199	7.03629e-07	0.0318258
ENSG00000137310.7	TCF19	31126318	31228040	T	C	0.830717	rs9264346	Primary	-0.625993	0.126199	7.03629e-07	0.0318258
ENSG00000137310.7	TCF19	31126318	31228087	G	A	0.830717	rs9264351	Primary	-0.625993	0.126199	7.03629e-07	0.0318258
ENSG00000137310.7	TCF19	31126318	31228104	A	G	0.830717	rs9264352	Primary	-0.625993	0.126199	7.03629e-07	0.0318258
ENSG00000137310.7	TCF19	31126318	31228174	A	C	0.830717	rs9264353	Primary	-0.625993	0.126199	7.03629e-07	0.0318258
ENSG00000137310.7	TCF19	31126318	31228185	T	G	0.830717	rs9264354	Primary	-0.625993	0.126199	7.03629e-07	0.0318258
ENSG00000137310.7	TCF19	31126318	31228186	T	C	0.884529	rs9264355	Primary	-0.843187	0.147528	1.09434e-08	0.000494979
ENSG00000137310.7	TCF19	31126318	31228212	C	T	0.827354	rs9264356	Primary	-0.600157	0.124797	1.5165e-06	0.0685926
ENSG00000137310.7	TCF19	31126318	31228327	A	G	0.825112	rs9264362	Primary	-0.631625	0.122266	2.3917e-07	0.0108179
ENSG00000137310.7	TCF19	31126318	31228430	G	T	0.825112	rs9264367	Primary	-0.602051	0.124536	1.33571e-06	0.0604154
ENSG00000137310.7	TCF19	31126318	31228460	A	G	0.827354	rs9264368	Primary	-0.618933	0.124486	6.62939e-07	0.0299854
ENSG00000137310.7	TCF19	31126318	31228601	A	G	0.830717	rs9264372	Primary	-0.625993	0.126199	7.03629e-07	0.0318258
ENSG00000137310.7	TCF19	31126318	31228666	C	T	0.827354	rs9264374	Primary	-0.600157	0.124797	1.5165e-06	0.0685926
ENSG00000137310.7	TCF19	31126318	31228707	A	C	0.830717	rs9264375	Primary	-0.625993	0.126199	7.03629e-07	0.0318258
ENSG00000137310.7	TCF19	31126318	31228868	T	C	0.827354	rs3132493	Primary	-0.600157	0.124797	1.5165e-06	0.0685926
ENSG00000137310.7	TCF19	31126318	31229041	C	A	0.827354	rs3130541	Primary	-0.600157	0.124797	1.5165e-06	0.0685926
ENSG00000137310.7	TCF19	31126318	31229055	T	C	0.828475	rs9264384	Primary	-0.644193	0.125707	2.98211e-07	0.0134884
ENSG00000137310.7	TCF19	31126318	31229075	GA	G	0.825112	.	Primary	-0.61805	0.124332	6.66263e-07	0.0301358
ENSG00000137310.7	TCF19	31126318	31229130	G	C	0.830717	rs9264386	Primary	-0.641928	0.128166	5.4839e-07	0.0248042
ENSG00000137310.7	TCF19	31126318	31229188	C	T	0.83296	rs9264388	Primary	-0.661281	0.131361	4.80166e-07	0.0217184
ENSG00000137310.7	TCF19	31126318	31229191	G	C	0.829596	rs9264389	Primary	-0.632288	0.129775	1.1037e-06	0.0499215
ENSG00000137310.7	TCF19	31126318	31229196	T	C	0.829596	rs9264390	Primary	-0.632288	0.129775	1.1037e-06	0.0499215
ENSG00000137310.7	TCF19	31126318	31229289	A	G	0.827354	rs9264395	Primary	-0.600157	0.124797	1.5165e-06	0.0685926
ENSG00000137310.7	TCF19	31126318	31229413	C	T	0.840807	rs9264400	Primary	-0.71306	0.130597	4.76119e-08	0.00215353
ENSG00000137310.7	TCF19	31126318	31229444	C	T	0.82287	rs9264402	Primary	-0.596036	0.124528	1.69817e-06	0.0768099
ENSG00000137310.7	TCF19	31126318	31229593	A	C	0.830717	rs9264405	Primary	-0.625993	0.126199	7.03629e-07	0.0318258
ENSG00000137310.7	TCF19	31126318	31229610	A	G	0.830717	rs9264406	Primary	-0.625993	0.126199	7.03629e-07	0.0318258
ENSG00000137310.7	TCF19	31126318	31229669	T	C	0.826233	rs9264407	Primary	-0.641287	0.125523	3.24015e-07	0.0146555
ENSG00000137310.7	TCF19	31126318	31229723	G	A	0.841928	rs9264408	Primary	-0.689111	0.129477	1.02481e-07	0.00463532
ENSG00000137310.7	TCF19	31126318	31229738	A	G	0.830717	rs9264409	Primary	-0.625993	0.126199	7.03629e-07	0.0318258
ENSG00000137310.7	TCF19	31126318	31229775	C	T	0.830717	rs9264410	Primary	-0.625993	0.126199	7.03629e-07	0.0318258
ENSG00000137310.7	TCF19	31126318	31229845	C	T	0.830717	rs9264411	Primary	-0.625993	0.126199	7.03629e-07	0.0318258
ENSG00000137310.7	TCF19	31126318	31229921	G	C	0.828475	rs9264412	Primary	-0.637045	0.126316	4.57702e-07	0.0207023
ENSG00000137310.7	TCF19	31126318	31229930	C	T	0.845291	rs9264413	Primary	-0.720435	0.131082	3.88317e-08	0.0017564
ENSG00000137310.7	TCF19	31126318	31229942	T	C	0.830717	rs9264414	Primary	-0.625993	0.126199	7.03629e-07	0.0318258
ENSG00000137310.7	TCF19	31126318	31230003	TG	T	0.827354	.	Primary	-0.600157	0.124797	1.5165e-06	0.0685926
ENSG00000137310.7	TCF19	31126318	31230042	G	A	0.884529	rs9264416	Primary	-0.843187	0.147528	1.09434e-08	0.000494979
ENSG00000137310.7	TCF19	31126318	31230078	A	G	0.830717	rs9264417	Primary	-0.625993	0.126199	7.03629e-07	0.0318258
ENSG00000137310.7	TCF19	31126318	31230136	T	C	0.788117	rs2394949	Primary	-0.57028	0.117524	1.2194e-06	0.0551546
ENSG00000137310.7	TCF19	31126318	31230174	T	A	0.830717	rs9264420	Primary	-0.625993	0.126199	7.03629e-07	0.0318258
ENSG00000137310.7	TCF19	31126318	31230180	C	A	0.827354	rs9264421	Primary	-0.600157	0.124797	1.5165e-06	0.0685926
ENSG00000137310.7	TCF19	31126318	31230183	C	T	0.827354	rs9264422	Primary	-0.600157	0.124797	1.5165e-06	0.0685926
ENSG00000137310.7	TCF19	31126318	31230216	T	C	0.884529	rs9264423	Primary	-0.843187	0.147528	1.09434e-08	0.000494979
ENSG00000137310.7	TCF19	31126318	31230318	A	G	0.827354	rs9264425	Primary	-0.600157	0.124797	1.5165e-06	0.0685926
ENSG00000137310.7	TCF19	31126318	31230319	C	A	0.827354	rs9264426	Primary	-0.600157	0.124797	1.5165e-06	0.0685926
ENSG00000137310.7	TCF19	31126318	31230356	G	A	0.830717	rs9264427	Primary	-0.625993	0.126199	7.03629e-07	0.0318258
ENSG00000137310.7	TCF19	31126318	31230452	C	A	0.830717	rs9264428	Primary	-0.625993	0.126199	7.03629e-07	0.0318258
ENSG00000137310.7	TCF19	31126318	31230498	G	A	0.827354	rs9264429	Primary	-0.600157	0.124797	1.5165e-06	0.0685926
ENSG00000137310.7	TCF19	31126318	31230605	C	T	0.827354	rs4995903	Primary	-0.600157	0.124797	1.5165e-06	0.0685926
ENSG00000137310.7	TCF19	31126318	31230645	C	T	0.827354	rs4995902	Primary	-0.600157	0.124797	1.5165e-06	0.0685926
ENSG00000137310.7	TCF19	31126318	31230759	A	G	0.830717	rs2394951	Primary	-0.625993	0.126199	7.03629e-07	0.0318258
ENSG00000137310.7	TCF19	31126318	31230882	G	A	0.830717	rs2394952	Primary	-0.625993	0.126199	7.03629e-07	0.0318258
ENSG00000137310.7	TCF19	31126318	31231965	TC	T	0.827354	rs63034761	Primary	-0.600157	0.124797	1.5165e-06	0.0685926
ENSG00000137310.7	TCF19	31126318	31231972	A	G	0.830717	rs9264474	Primary	-0.625993	0.126199	7.03629e-07	0.0318258
ENSG00000137310.7	TCF19	31126318	31232111	A	G	0.830717	rs3130542	Primary	-0.625993	0.126199	7.03629e-07	0.0318258
ENSG00000137310.7	TCF19	31126318	31232147	C	T	0.827354	rs3130543	Primary	-0.600157	0.124797	1.5165e-06	0.0685926
ENSG00000137310.7	TCF19	31126318	31232337	G	GGGAAGATGTGTGAATAATCATTTCACCAT	0.830717	rs9281293	Primary	-0.625993	0.126199	7.03629e-07	0.0318258
ENSG00000137310.7	TCF19	31126318	31232412	T	G	0.830717	rs9264482	Primary	-0.625993	0.126199	7.03629e-07	0.0318258
ENSG00000137310.7	TCF19	31126318	31232446	T	C	0.827354	rs9264483	Primary	-0.600157	0.124797	1.5165e-06	0.0685926
ENSG00000137310.7	TCF19	31126318	31232482	A	T	0.884529	rs9264486	Primary	-0.843187	0.147528	1.09434e-08	0.000494979
ENSG00000137310.7	TCF19	31126318	31232563	C	G	0.830717	rs9264489	Primary	-0.625993	0.126199	7.03629e-07	0.0318258
ENSG00000137310.7	TCF19	31126318	31232697	A	G	0.827354	rs9264493	Primary	-0.600157	0.124797	1.5165e-06	0.0685926
ENSG00000137310.7	TCF19	31126318	31232703	A	G	0.830717	rs9264494	Primary	-0.625993	0.126199	7.03629e-07	0.0318258
ENSG00000137310.7	TCF19	31126318	31232722	C	T	0.826233	rs9264495	Primary	-0.611156	0.124633	9.40829e-07	0.0425546
ENSG00000137310.7	TCF19	31126318	31232723	A	G	0.826233	rs9264496	Primary	-0.611156	0.124633	9.40829e-07	0.0425546
ENSG00000137310.7	TCF19	31126318	31232769	G	A	0.829596	rs9264497	Primary	-0.637206	0.126022	4.27435e-07	0.0193333
ENSG00000137310.7	TCF19	31126318	31232789	A	T	0.830717	rs9264498	Primary	-0.625993	0.126199	7.03629e-07	0.0318258
ENSG00000137310.7	TCF19	31126318	31232825	G	A	0.827354	rs9264500	Primary	-0.600157	0.124797	1.5165e-06	0.0685926
ENSG00000137310.7	TCF19	31126318	31232913	C	T	0.830717	rs9264502	Primary	-0.625993	0.126199	7.03629e-07	0.0318258
ENSG00000137310.7	TCF19	31126318	31233121	T	C	0.828475	rs9264505	Primary	-0.626403	0.126162	6.86745e-07	0.0310622
ENSG00000137310.7	TCF19	31126318	31233143	C	T	0.82287	rs9264506	Primary	-0.61642	0.124532	7.4254e-07	0.0335858
ENSG00000137310.7	TCF19	31126318	31233152	A	G	0.828475	rs9264507	Primary	-0.641891	0.125926	3.44426e-07	0.0155787
ENSG00000137310.7	TCF19	31126318	31233214	T	C	0.830717	rs9264508	Primary	-0.625993	0.126199	7.03629e-07	0.0318258
ENSG00000137310.7	TCF19	31126318	31233232	A	G	0.828475	.	Primary	-0.626403	0.126162	6.86745e-07	0.0310622
ENSG00000137310.7	TCF19	31126318	31233258	G	C	0.828475	.	Primary	-0.626403	0.126162	6.86745e-07	0.0310622
ENSG00000137310.7	TCF19	31126318	31233270	T	G	0.828475	rs2894202	Primary	-0.626403	0.126162	6.86745e-07	0.0310622
ENSG00000137310.7	TCF19	31126318	31233353	G	A	0.827354	rs2394953	Primary	-0.600157	0.124797	1.5165e-06	0.0685926
ENSG00000137310.7	TCF19	31126318	31233395	T	C	0.826233	rs2394954	Primary	-0.604951	0.124727	1.23337e-06	0.0557866
ENSG00000137310.7	TCF19	31126318	31233396	G	A	0.826233	rs2394955	Primary	-0.604951	0.124727	1.23337e-06	0.0557866
ENSG00000137310.7	TCF19	31126318	31233456	C	T	0.830717	rs2394956	Primary	-0.625993	0.126199	7.03629e-07	0.0318258
ENSG00000137310.7	TCF19	31126318	31233521	T	C	0.830717	rs2394957	Primary	-0.625993	0.126199	7.03629e-07	0.0318258
ENSG00000137310.7	TCF19	31126318	31233529	T	C	0.830717	.	Primary	-0.625993	0.126199	7.03629e-07	0.0318258
ENSG00000137310.7	TCF19	31126318	31233532	G	A	0.817265	rs2894203	Primary	-0.6173	0.122662	4.8407e-07	0.021895
ENSG00000137310.7	TCF19	31126318	31233643	T	C	0.827354	.	Primary	-0.600157	0.124797	1.5165e-06	0.0685926
ENSG00000137310.7	TCF19	31126318	31233758	T	A	0.830717	rs9264523	Primary	-0.625993	0.126199	7.03629e-07	0.0318258
ENSG00000137310.7	TCF19	31126318	31233845	T	G	0.827354	rs9264524	Primary	-0.600157	0.124797	1.5165e-06	0.0685926
ENSG00000137310.7	TCF19	31126318	31234058	A	G	0.827354	rs9264528	Primary	-0.600157	0.124797	1.5165e-06	0.0685926
ENSG00000137310.7	TCF19	31126318	31234074	G	A	0.827354	rs9264529	Primary	-0.600157	0.124797	1.5165e-06	0.0685926
ENSG00000137310.7	TCF19	31126318	31234239	A	T	0.827354	rs9264531	Primary	-0.596206	0.125848	2.16361e-06	0.0978624
ENSG00000137310.7	TCF19	31126318	31234516	CAT	C	0.826233	rs9279065	Primary	-0.607857	0.124781	1.10813e-06	0.0501218
ENSG00000137310.7	TCF19	31126318	31234541	G	A	0.826233	rs77994113	Primary	-0.607857	0.124781	1.10813e-06	0.0501218
ENSG00000137310.7	TCF19	31126318	31234678	G	A	0.827354	rs9264544	Primary	-0.600157	0.124797	1.5165e-06	0.0685926
ENSG00000137310.7	TCF19	31126318	31234771	A	G	0.830717	rs9264548	Primary	-0.625993	0.126199	7.03629e-07	0.0318258
ENSG00000137310.7	TCF19	31126318	31234774	C	G	0.827354	rs9264549	Primary	-0.600157	0.124797	1.5165e-06	0.0685926
ENSG00000137310.7	TCF19	31126318	31234836	C	G	0.828475	rs9264552	Primary	-0.601585	0.12618	1.86369e-06	0.0842966
ENSG00000137310.7	TCF19	31126318	31234851	C	G	0.828475	rs9264553	Primary	-0.601585	0.12618	1.86369e-06	0.0842966
ENSG00000137310.7	TCF19	31126318	31235374	A	G	0.830717	rs9264567	Primary	-0.625993	0.126199	7.03629e-07	0.0318258
ENSG00000137310.7	TCF19	31126318	31235383	T	C	0.827354	rs9264568	Primary	-0.600157	0.124797	1.5165e-06	0.0685926
ENSG00000137310.7	TCF19	31126318	31235412	T	C	0.829596	rs9264569	Primary	-0.627132	0.125896	6.31441e-07	0.0285607
ENSG00000137310.7	TCF19	31126318	31235421	C	T	0.829596	rs9264570	Primary	-0.643616	0.125975	3.23759e-07	0.014644
ENSG00000137310.7	TCF19	31126318	31235558	A	G	0.828475	rs6907910	Primary	-0.638919	0.125583	3.62537e-07	0.0163979
ENSG00000137310.7	TCF19	31126318	31235576	G	C	0.828475	rs9264575	Primary	-0.638919	0.125583	3.62537e-07	0.0163979
ENSG00000137310.7	TCF19	31126318	31235610	C	A	0.825112	rs6907622	Primary	-0.612829	0.124196	8.04072e-07	0.036369
ENSG00000137310.7	TCF19	31126318	31235708	C	G	0.825112	rs9264578	Primary	-0.612829	0.124196	8.04072e-07	0.036369
ENSG00000137310.7	TCF19	31126318	31235786	C	T	0.825112	rs9264581	Primary	-0.612829	0.124196	8.04072e-07	0.036369
ENSG00000137310.7	TCF19	31126318	31235816	A	G	0.828475	rs9264582	Primary	-0.638919	0.125583	3.62537e-07	0.0163979
ENSG00000137310.7	TCF19	31126318	31236034	T	C	0.689462	rs9264584	Primary	-0.638721	0.109977	6.3309e-09	0.000286353
ENSG00000137310.7	TCF19	31126318	31236853	G	A	0.877803	rs1065711	Primary	-0.843285	0.144349	5.15766e-09	0.000233286
ENSG00000137310.7	TCF19	31126318	31236998	C	T	0.882287	rs2001181	Primary	-0.856831	0.146366	4.79832e-09	0.000217033
ENSG00000137310.7	TCF19	31126318	31239306	T	G	0.881166	rs7383157	Primary	-0.851684	0.146399	5.9711e-09	0.000270079
ENSG00000137310.7	TCF19	31126318	31239722	A	C	0.867713	rs9264670	Primary	-0.716304	0.138761	2.44134e-07	0.0110424
ENSG00000137310.7	TCF19	31126318	31240353	A	C	0.882287	rs28498059	Primary	-0.856831	0.146366	4.79832e-09	0.000217033
ENSG00000137310.7	TCF19	31126318	31240663	T	A	0.882287	rs9264679	Primary	-0.856831	0.146366	4.79832e-09	0.000217033
ENSG00000137310.7	TCF19	31126318	31241270	G	A	0.839686	rs6900323	Primary	-0.731369	0.132357	3.28121e-08	0.00148412
ENSG00000137310.7	TCF19	31126318	31242272	C	T	0.882287	rs3132491	Primary	-0.856831	0.146366	4.79832e-09	0.000217033
ENSG00000137310.7	TCF19	31126318	31243197	A	G	0.882287	rs3130694	Primary	-0.856831	0.146366	4.79832e-09	0.000217033
ENSG00000137310.7	TCF19	31126318	31244068	G	A	0.882287	rs9264731	Primary	-0.856831	0.146366	4.79832e-09	0.000217033
ENSG00000137310.7	TCF19	31126318	31244181	C	T	0.882287	rs9264732	Primary	-0.856831	0.146366	4.79832e-09	0.000217033
ENSG00000137310.7	TCF19	31126318	31244230	A	C	0.882287	rs9264734	Primary	-0.856831	0.146366	4.79832e-09	0.000217033
ENSG00000137310.7	TCF19	31126318	31244247	A	G	0.882287	rs9264736	Primary	-0.856831	0.146366	4.79832e-09	0.000217033
ENSG00000137310.7	TCF19	31126318	31244249	T	C	0.882287	rs9264737	Primary	-0.856831	0.146366	4.79832e-09	0.000217033
ENSG00000137310.7	TCF19	31126318	31244261	C	A	0.882287	rs9264738	Primary	-0.856831	0.146366	4.79832e-09	0.000217033
ENSG00000137310.7	TCF19	31126318	31244300	G	A	0.882287	rs9264739	Primary	-0.856831	0.146366	4.79832e-09	0.000217033
ENSG00000137310.7	TCF19	31126318	31244616	T	C	0.882287	rs9264742	Primary	-0.856831	0.146366	4.79832e-09	0.000217033
ENSG00000137310.7	TCF19	31126318	31244654	A	G	0.882287	rs3930575	Primary	-0.856831	0.146366	4.79832e-09	0.000217033
ENSG00000137310.7	TCF19	31126318	31244960	T	C	0.839686	rs6919908	Primary	-0.697682	0.133032	1.56743e-07	0.00708966
ENSG00000137310.7	TCF19	31126318	31246703	G	A	0.867713	rs7381988	Primary	-0.716304	0.138761	2.44134e-07	0.0110424
ENSG00000137310.7	TCF19	31126318	31247067	T	G	0.882287	rs7382297	Primary	-0.856831	0.146366	4.79832e-09	0.000217033
ENSG00000137310.7	TCF19	31126318	31247149	A	G	0.880045	rs7382307	Primary	-0.818225	0.146258	2.21417e-08	0.00100149
ENSG00000137310.7	TCF19	31126318	31248434	A	G	0.831839	rs9264758	Primary	-0.626973	0.12929	1.2387e-06	0.0560276
ENSG00000137310.7	TCF19	31126318	31248678	T	C	0.82287	rs9264759	Primary	-0.63469	0.128248	7.46316e-07	0.0337566
ENSG00000137310.7	TCF19	31126318	31249196	A	C	0.882287	rs9264763	Primary	-0.856831	0.146366	4.79832e-09	0.000217033
ENSG00000137310.7	TCF19	31126318	31291285	T	C	0.906951	rs9265259	Primary	-0.81687	0.168305	1.21299e-06	0.054865
ENSG00000137310.7	TCF19	31126318	31312006	T	TG	0.906951	rs9281363	Primary	-0.81687	0.168305	1.21299e-06	0.054865
ENSG00000137310.7	TCF19	31126318	31321123	G	T	0.906951	rs2523612	Conditional 1	-0.827147	0.173927	1.9775e-06	0.0894445
ENSG00000137310.7	TCF19	31126318	31321360	A	G	0.887892	rs2844585	Primary	-0.780002	0.156672	6.40553e-07	0.0289729
ENSG00000137310.7	TCF19	31126318	31325028	A	G	0.90583	rs2596489	Primary	-0.850877	0.170816	6.31711e-07	0.0285729
ENSG00000137310.7	TCF19	31126318	31325030	T	C	0.90583	rs2596488	Primary	-0.850877	0.170816	6.31711e-07	0.0285729
ENSG00000137310.7	TCF19	31126318	31333032	T	C	0.913677	rs9266366	Primary	-0.880371	0.180871	1.13077e-06	0.0511458
ENSG00000137310.7	TCF19	31126318	31350550	C	A	0.909193	rs2523532	Primary	-0.888085	0.177084	5.30175e-07	0.0239803
ENSG00000137310.7	TCF19	31126318	31355702	G	C	0.911435	rs2523480	Primary	-0.895012	0.17818	5.08488e-07	0.0229994
ENSG00000137310.7	TCF19	31126318	31366472	T	C	0.913677	rs2853967	Primary	-0.880371	0.180871	1.13077e-06	0.0511458
ENSG00000137310.7	TCF19	31126318	31367882	A	G	0.911435	rs2596540	Primary	-0.895012	0.17818	5.08488e-07	0.0229994
ENSG00000137310.7	TCF19	31126318	31380341	A	G	0.912556	rs2853971	Primary	-0.882535	0.179305	8.56802e-07	0.038754
ENSG00000137310.7	TCF19	31126318	31387157	C	T	0.912556	rs2516450	Primary	-0.882535	0.179305	8.56802e-07	0.038754
ENSG00000137310.7	TCF19	31126318	31388053	C	T	0.914798	rs2596533	Primary	-0.867106	0.182008	1.89686e-06	0.085797
ENSG00000137310.7	TCF19	31126318	31393684	A	G	0.912556	rs3132091	Primary	-0.882535	0.179305	8.56802e-07	0.038754
ENSG00000137310.7	TCF19	31126318	31403518	T	C	0.912556	rs3093960	Primary	-0.882535	0.179305	8.56802e-07	0.038754
ENSG00000137310.7	TCF19	31126318	31409142	G	C	0.912556	rs2516469	Primary	-0.882535	0.179305	8.56802e-07	0.038754
ENSG00000137310.7	TCF19	31126318	31437492	C	G	0.89574	rs2523670	Conditional 1	-0.764158	0.158947	1.5274e-06	0.0690858
ENSG00000137310.7	TCF19	31126318	31449327	A	G	0.894619	rs2905722	Conditional 1	-0.748982	0.158128	2.17393e-06	0.098329
ENSG00000137411.12	VARS2	30876018	28678357	T	C	0.900224	rs7775835	Primary	0.890173	0.187474	2.05175e-06	0.0928029
ENSG00000137411.12	VARS2	30876018	29335154	T	C	0.0986547	rs9257793	Primary	-0.92035	0.181288	3.83963e-07	0.017367
ENSG00000137411.12	VARS2	30876018	29340743	C	T	0.0852018	rs9257800	Primary	-0.964071	0.197251	1.02106e-06	0.0461836
ENSG00000137411.12	VARS2	30876018	29344395	C	T	0.0975336	rs9257803	Primary	-0.875	0.18185	1.49683e-06	0.0677031
ENSG00000137411.12	VARS2	30876018	29346329	A	G	0.0997758	rs9257805	Primary	-0.862516	0.181076	1.90478e-06	0.0861553
ENSG00000137411.12	VARS2	30876018	29356331	A	G	0.0863229	rs9257809	Primary	-1.03101	0.19431	1.12049e-07	0.00506809
ENSG00000137411.12	VARS2	30876018	29356687	G	T	0.0840807	rs442694	Primary	-1.01106	0.19674	2.76123e-07	0.0124893
ENSG00000137411.12	VARS2	30876018	29372323	A	G	0.0896861	rs429479	Primary	-0.956719	0.191766	6.06927e-07	0.0274519
ENSG00000137411.12	VARS2	30876018	29375802	T	C	0.0896861	rs437955	Primary	-0.956719	0.191766	6.06927e-07	0.0274519
ENSG00000137411.12	VARS2	30876018	29376385	C	G	0.0896861	rs406511	Primary	-0.956719	0.191766	6.06927e-07	0.0274519
ENSG00000137411.12	VARS2	30876018	29411432	T	C	0.0874439	rs1535039	Primary	-0.969642	0.19499	6.59965e-07	0.0298509
ENSG00000137411.12	VARS2	30876018	29415464	C	A	0.0874439	rs2523443	Primary	-0.969642	0.19499	6.59965e-07	0.0298509
ENSG00000137411.12	VARS2	30876018	29432173	A	T	0.0874439	rs2143668	Primary	-0.969642	0.19499	6.59965e-07	0.0298509
ENSG00000137411.12	VARS2	30876018	29435355	T	C	0.0896861	rs2746149	Primary	-0.966579	0.192723	5.29274e-07	0.0239396
ENSG00000137411.12	VARS2	30876018	29437033	C	T	0.088565	rs2206853	Primary	-0.95325	0.193465	8.33971e-07	0.0377213
ENSG00000137411.12	VARS2	30876018	29442701	C	T	0.0874439	rs2746150	Primary	-0.969642	0.19499	6.59965e-07	0.0298509
ENSG00000137411.12	VARS2	30876018	29452136	T	G	0.0874439	rs1234844	Primary	-0.969642	0.19499	6.59965e-07	0.0298509
ENSG00000137411.12	VARS2	30876018	29453219	T	C	0.088565	rs1233494	Primary	-0.95325	0.193465	8.33971e-07	0.0377213
ENSG00000137411.12	VARS2	30876018	29458241	A	G	0.0896861	rs1233493	Primary	-0.936446	0.19313	1.24226e-06	0.0561885
ENSG00000137411.12	VARS2	30876018	29461730	G	C	0.0874439	rs1233491	Primary	-0.969642	0.19499	6.59965e-07	0.0298509
ENSG00000137411.12	VARS2	30876018	29463043	T	A	0.0874439	rs1233489	Primary	-0.969642	0.19499	6.59965e-07	0.0298509
ENSG00000137411.12	VARS2	30876018	29467719	G	A	0.0874439	rs1233488	Primary	-0.969642	0.19499	6.59965e-07	0.0298509
ENSG00000137411.12	VARS2	30876018	29477414	C	T	0.103139	rs1233480	Primary	-0.96751	0.178349	5.80157e-08	0.00262411
ENSG00000137411.12	VARS2	30876018	29480224	G	A	0.105381	rs385816	Primary	-0.966359	0.178687	6.3695e-08	0.00288099
ENSG00000137411.12	VARS2	30876018	29483620	A	T	0.105381	rs3094569	Primary	-0.966359	0.178687	6.3695e-08	0.00288099
ENSG00000137411.12	VARS2	30876018	29484110	G	A	0.0997758	rs2523432	Primary	-0.966261	0.180267	8.31498e-08	0.00376095
ENSG00000137411.12	VARS2	30876018	29484215	G	T	0.0874439	rs2523431	Primary	-0.969642	0.19499	6.59965e-07	0.0298509
ENSG00000137411.12	VARS2	30876018	29519554	G	T	0.088565	rs408623	Primary	-1.09327	0.191052	1.05029e-08	0.000475057
ENSG00000137411.12	VARS2	30876018	29521445	C	T	0.088565	rs389419	Primary	-1.09327	0.191052	1.05029e-08	0.000475057
ENSG00000137411.12	VARS2	30876018	29523957	A	G	0.088565	rs404240	Primary	-1.09327	0.191052	1.05029e-08	0.000475057
ENSG00000137411.12	VARS2	30876018	29526562	G	A	0.088565	rs413670	Primary	-1.09327	0.191052	1.05029e-08	0.000475057
ENSG00000137411.12	VARS2	30876018	29537224	A	G	0.0840807	rs1235162	Primary	-1.04298	0.193794	7.37116e-08	0.00333405
ENSG00000137411.12	VARS2	30876018	29546799	G	A	0.100897	rs1233396	Primary	-1.07277	0.177176	1.40546e-09	6.35703e-05
ENSG00000137411.12	VARS2	30876018	29548089	G	A	0.100897	rs926552	Primary	-1.07277	0.177176	1.40546e-09	6.35703e-05
ENSG00000137411.12	VARS2	30876018	29549653	C	G	0.0896861	rs1233393	Primary	-1.02585	0.190039	6.73484e-08	0.00304623
ENSG00000137411.12	VARS2	30876018	29559238	T	C	0.0896861	rs1233385	Primary	-1.02585	0.190039	6.73484e-08	0.00304623
ENSG00000137411.12	VARS2	30876018	29607101	T	C	0.0908072	rs3131856	Primary	-1.05792	0.188927	2.14846e-08	0.00097177
ENSG00000137411.12	VARS2	30876018	29659255	C	A	0.0908072	rs3131894	Primary	-1.05792	0.188927	2.14846e-08	0.00097177
ENSG00000137411.12	VARS2	30876018	29660816	C	A	0.0919283	rs3116813	Primary	-1.02777	0.185488	3.00975e-08	0.00136134
ENSG00000137411.12	VARS2	30876018	29752808	A	G	0.0952915	rs9258375	Primary	-1.00958	0.185482	5.23946e-08	0.00236986
ENSG00000137411.12	VARS2	30876018	29905437	A	T	0.108744	rs3098023	Primary	-0.806474	0.158879	3.85419e-07	0.0174329
ENSG00000137411.12	VARS2	30876018	29970960	G	C	0.0952915	rs3094146	Primary	-1.04895	0.183721	1.13312e-08	0.000512524
ENSG00000137411.12	VARS2	30876018	29986324	T	A	0.0952915	rs3115631	Primary	-1.04895	0.183721	1.13312e-08	0.000512524
ENSG00000137411.12	VARS2	30876018	30032522	A	C	0.0952915	rs8321	Primary	-1.04895	0.183721	1.13312e-08	0.000512524
ENSG00000137411.12	VARS2	30876018	30038647	T	C	0.0952915	rs9261290	Primary	-1.04895	0.183721	1.13312e-08	0.000512524
ENSG00000137411.12	VARS2	30876018	30055930	GA	G	0.0952915	.	Primary	-1.04895	0.183721	1.13312e-08	0.000512524
ENSG00000137411.12	VARS2	30876018	30063652	G	C	0.0964126	rs1264706	Primary	-1.03017	0.181763	1.44757e-08	0.000654751
ENSG00000137411.12	VARS2	30876018	30063674	G	C	0.0964126	rs1264705	Primary	-1.03017	0.181763	1.44757e-08	0.000654751
ENSG00000137411.12	VARS2	30876018	30074072	G	C	0.107623	rs2517601	Primary	-0.941142	0.171248	3.8899e-08	0.00175944
ENSG00000137411.12	VARS2	30876018	30075613	T	C	0.102018	rs2023473	Primary	-0.970153	0.181425	8.92302e-08	0.00403597
ENSG00000137411.12	VARS2	30876018	30083708	C	T	0.0986547	rs2523978	Primary	-1.06664	0.182145	4.74122e-09	0.00021445
ENSG00000137411.12	VARS2	30876018	30112795	G	A	0.102018	rs2844789	Primary	-0.970153	0.181425	8.92302e-08	0.00403597
ENSG00000137411.12	VARS2	30876018	30122623	T	C	0.165919	rs2517645	Primary	-0.681554	0.143275	1.96517e-06	0.0888868
ENSG00000137411.12	VARS2	30876018	30122657	C	G	0.125561	rs2523735	Primary	-0.912446	0.163601	2.44315e-08	0.00110506
ENSG00000137411.12	VARS2	30876018	30125543	C	T	0.102018	rs1970	Primary	-0.970153	0.181425	8.92302e-08	0.00403597
ENSG00000137411.12	VARS2	30876018	30127805	A	G	0.102018	rs1573296	Primary	-0.970153	0.181425	8.92302e-08	0.00403597
ENSG00000137411.12	VARS2	30876018	30128949	G	T	0.102018	rs2157678	Primary	-0.970153	0.181425	8.92302e-08	0.00403597
ENSG00000137411.12	VARS2	30876018	30137387	G	A	0.102018	rs2523729	Primary	-1.02981	0.1811	1.29717e-08	0.000586725
ENSG00000137411.12	VARS2	30876018	30152467	G	T	0.0975336	rs11158	Primary	-1.03693	0.183171	1.50503e-08	0.00068074
ENSG00000137411.12	VARS2	30876018	30153363	G	A	0.0986547	rs2106072	Primary	-1.06664	0.182145	4.74122e-09	0.00021445
ENSG00000137411.12	VARS2	30876018	30155149	G	C	0.102018	rs2517622	Primary	-1.02981	0.1811	1.29717e-08	0.000586725
ENSG00000137411.12	VARS2	30876018	30161536	G	A	0.0986547	rs2517617	Primary	-1.06664	0.182145	4.74122e-09	0.00021445
ENSG00000137411.12	VARS2	30876018	30163955	G	A	0.186099	rs2517614	Primary	-0.778371	0.134781	7.69245e-09	0.000347937
ENSG00000137411.12	VARS2	30876018	30165273	C	T	0.186099	rs2523722	Primary	-0.778371	0.134781	7.69245e-09	0.000347937
ENSG00000137411.12	VARS2	30876018	30166266	C	T	0.197309	rs2523721	Primary	-0.784295	0.130529	1.87138e-09	8.46443e-05
ENSG00000137411.12	VARS2	30876018	30167404	GT	G	0.147982	.	Primary	-0.747534	0.153097	1.04623e-06	0.0473219
ENSG00000137411.12	VARS2	30876018	30167835	C	T	0.186099	rs2428503	Primary	-0.778371	0.134781	7.69245e-09	0.000347937
ENSG00000137411.12	VARS2	30876018	30168319	G	T	0.137892	rs2523719	Primary	-0.748124	0.154597	1.30363e-06	0.0589646
ENSG00000137411.12	VARS2	30876018	30169092	A	G	0.132287	rs2517612	Primary	-0.781255	0.160217	1.08125e-06	0.0489059
ENSG00000137411.12	VARS2	30876018	30169327	A	G	0.188341	rs2517611	Primary	-0.784922	0.132419	3.07497e-09	0.000139084
ENSG00000137411.12	VARS2	30876018	30169475	T	C	0.199552	rs2284166	Primary	-0.791693	0.128444	7.10554e-10	3.21391e-05
ENSG00000137411.12	VARS2	30876018	30169932	GA	G	0.196188	.	Primary	-0.785289	0.128255	9.18898e-10	4.15627e-05
ENSG00000137411.12	VARS2	30876018	30170280	A	G	0.199552	rs2517610	Primary	-0.791693	0.128444	7.10554e-10	3.21391e-05
ENSG00000137411.12	VARS2	30876018	30170287	A	G	0.102018	rs2517609	Primary	-1.02981	0.1811	1.29717e-08	0.000586725
ENSG00000137411.12	VARS2	30876018	30170510	T	C	0.199552	rs1117490	Primary	-0.791693	0.128444	7.10554e-10	3.21391e-05
ENSG00000137411.12	VARS2	30876018	30170525	C	T	0.196188	rs2523716	Primary	-0.785289	0.128255	9.18898e-10	4.15627e-05
ENSG00000137411.12	VARS2	30876018	30170628	T	TA	0.188341	.	Primary	-0.784922	0.132419	3.07497e-09	0.000139084
ENSG00000137411.12	VARS2	30876018	30170906	G	T	0.200673	rs1117488	Primary	-0.796828	0.12741	3.99948e-10	1.809e-05
ENSG00000137411.12	VARS2	30876018	30170970	A	G	0.199552	rs1117487	Primary	-0.791693	0.128444	7.10554e-10	3.21391e-05
ENSG00000137411.12	VARS2	30876018	30171284	C	T	0.132287	rs2523715	Primary	-0.781255	0.160217	1.08125e-06	0.0489059
ENSG00000137411.12	VARS2	30876018	30171369	G	T	0.199552	rs2523714	Primary	-0.791693	0.128444	7.10554e-10	3.21391e-05
ENSG00000137411.12	VARS2	30876018	30171417	C	T	0.196188	rs2517608	Primary	-0.785289	0.128255	9.18898e-10	4.15627e-05
ENSG00000137411.12	VARS2	30876018	30171827	T	C	0.199552	rs2844776	Primary	-0.791693	0.128444	7.10554e-10	3.21391e-05
ENSG00000137411.12	VARS2	30876018	30172513	A	C	0.197309	rs971570	Primary	-0.744614	0.127483	5.19219e-09	0.000234848
ENSG00000137411.12	VARS2	30876018	30172571	CA	C	0.205157	.	Primary	-0.681442	0.124823	4.78059e-08	0.00216231
ENSG00000137411.12	VARS2	30876018	30173330	G	A	0.196188	rs2523713	Primary	-0.785289	0.128255	9.18898e-10	4.15627e-05
ENSG00000137411.12	VARS2	30876018	30173538	G	A	0.0986547	rs2523712	Primary	-1.06664	0.182145	4.74122e-09	0.00021445
ENSG00000137411.12	VARS2	30876018	30174131	C	T	0.199552	rs2021722	Primary	-0.791693	0.128444	7.10554e-10	3.21391e-05
ENSG00000137411.12	VARS2	30876018	30174428	A	T	0.132287	rs885913	Primary	-0.781255	0.160217	1.08125e-06	0.0489059
ENSG00000137411.12	VARS2	30876018	30174633	C	A	0.199552	rs885912	Primary	-0.791693	0.128444	7.10554e-10	3.21391e-05
ENSG00000137411.12	VARS2	30876018	30177939	G	A	0.132287	rs3129695	Primary	-0.781255	0.160217	1.08125e-06	0.0489059
ENSG00000137411.12	VARS2	30876018	30181567	T	TC	0.132287	.	Primary	-0.781255	0.160217	1.08125e-06	0.0489059
ENSG00000137411.12	VARS2	30876018	30181883	G	A	0.132287	rs2188100	Primary	-0.781255	0.160217	1.08125e-06	0.0489059
ENSG00000137411.12	VARS2	30876018	30186630	GGT	G	0.132287	.	Primary	-0.781255	0.160217	1.08125e-06	0.0489059
ENSG00000137411.12	VARS2	30876018	30202571	C	T	0.132287	rs885916	Primary	-0.781255	0.160217	1.08125e-06	0.0489059
ENSG00000137411.12	VARS2	30876018	30204008	T	C	0.132287	rs2517589	Primary	-0.781255	0.160217	1.08125e-06	0.0489059
ENSG00000137411.12	VARS2	30876018	30204247	A	T	0.102018	rs2844781	Primary	-1.02981	0.1811	1.29717e-08	0.000586725
ENSG00000137411.12	VARS2	30876018	30204399	C	G	0.132287	rs2523742	Primary	-0.781255	0.160217	1.08125e-06	0.0489059
ENSG00000137411.12	VARS2	30876018	30206014	G	A	0.102018	rs2844777	Primary	-1.02981	0.1811	1.29717e-08	0.000586725
ENSG00000137411.12	VARS2	30876018	30207360	T	TA	0.134529	.	Primary	-0.759979	0.156789	1.25241e-06	0.0566479
ENSG00000137411.12	VARS2	30876018	30207495	C	A	0.134529	rs2844773	Primary	-0.759979	0.156789	1.25241e-06	0.0566479
ENSG00000137411.12	VARS2	30876018	30208791	TATTA	T	0.134529	.	Primary	-0.759979	0.156789	1.25241e-06	0.0566479
ENSG00000137411.12	VARS2	30876018	30208843	G	A	0.134529	rs2844771	Primary	-0.759979	0.156789	1.25241e-06	0.0566479
ENSG00000137411.12	VARS2	30876018	30209918	A	G	0.134529	rs2188099	Primary	-0.759979	0.156789	1.25241e-06	0.0566479
ENSG00000137411.12	VARS2	30876018	30210550	C	A	0.134529	rs2844770	Primary	-0.759979	0.156789	1.25241e-06	0.0566479
ENSG00000137411.12	VARS2	30876018	30211617	TA	T	0.106502	.	Primary	-0.95908	0.172835	2.87155e-08	0.00129883
ENSG00000137411.12	VARS2	30876018	30213540	A	T	0.134529	rs2022083	Primary	-0.759979	0.156789	1.25241e-06	0.0566479
ENSG00000137411.12	VARS2	30876018	30214250	G	C	0.134529	rs3129696	Primary	-0.759979	0.156789	1.25241e-06	0.0566479
ENSG00000137411.12	VARS2	30876018	30223428	C	T	0.163677	rs2189373	Primary	-0.722476	0.135545	9.81212e-08	0.00443812
ENSG00000137411.12	VARS2	30876018	30224970	T	A	0.0986547	rs3094078	Primary	-1.06664	0.182145	4.74122e-09	0.00021445
ENSG00000137411.12	VARS2	30876018	30229267	G	C	0.102018	rs3094075	Primary	-1.02981	0.1811	1.29717e-08	0.000586725
ENSG00000137411.12	VARS2	30876018	30230768	A	T	0.102018	rs3130399	Primary	-1.02981	0.1811	1.29717e-08	0.000586725
ENSG00000137411.12	VARS2	30876018	30248711	G	A	0.0986547	rs3129830	Primary	-1.06664	0.182145	4.74122e-09	0.00021445
ENSG00000137411.12	VARS2	30876018	30251391	C	T	0.0986547	rs3094069	Primary	-1.06664	0.182145	4.74122e-09	0.00021445
ENSG00000137411.12	VARS2	30876018	30278745	C	T	0.102018	rs3094066	Primary	-1.02981	0.1811	1.29717e-08	0.000586725
ENSG00000137411.12	VARS2	30876018	30279074	C	G	0.171525	rs1264587	Primary	-0.690881	0.142474	1.23972e-06	0.0560739
ENSG00000137411.12	VARS2	30876018	30279130	G	A	0.0986547	rs3130380	Primary	-1.06664	0.182145	4.74122e-09	0.00021445
ENSG00000137411.12	VARS2	30876018	30285312	G	C	0.0986547	rs3094628	Primary	-1.06664	0.182145	4.74122e-09	0.00021445
ENSG00000137411.12	VARS2	30876018	30287777	A	G	0.0997758	rs3132651	Primary	-1.04403	0.181905	9.5001e-09	0.000429699
ENSG00000137411.12	VARS2	30876018	30296253	G	A	0.102018	rs3094064	Primary	-1.02981	0.1811	1.29717e-08	0.000586725
ENSG00000137411.12	VARS2	30876018	30299245	T	G	0.0986547	rs3094067	Primary	-1.06664	0.182145	4.74122e-09	0.00021445
ENSG00000137411.12	VARS2	30876018	30305993	CTT	C	0.103139	rs377476390	Primary	-1.01067	0.179118	1.67597e-08	0.000758056
ENSG00000137411.12	VARS2	30876018	30318327	G	A	0.0986547	rs3130355	Primary	-1.06664	0.182145	4.74122e-09	0.00021445
ENSG00000137411.12	VARS2	30876018	30319154	A	T	0.102018	rs3130364	Primary	-1.06522	0.179449	2.9192e-09	0.000132039
ENSG00000137411.12	VARS2	30876018	30321057	G	A	0.110987	rs3132649	Primary	-1.07574	0.170565	2.8463e-10	1.28741e-05
ENSG00000137411.12	VARS2	30876018	30321189	A	C	0.112108	rs3094061	Primary	-1.059	0.169277	3.94932e-10	1.78631e-05
ENSG00000137411.12	VARS2	30876018	30321336	C	T	0.112108	rs3130374	Primary	-1.059	0.169277	3.94932e-10	1.78631e-05
ENSG00000137411.12	VARS2	30876018	30321482	T	C	0.112108	rs3094627	Primary	-1.059	0.169277	3.94932e-10	1.78631e-05
ENSG00000137411.12	VARS2	30876018	30321732	C	A	0.110987	rs3130375	Primary	-1.07574	0.170565	2.8463e-10	1.28741e-05
ENSG00000137411.12	VARS2	30876018	30322931	GT	G	0.112108	.	Primary	-1.059	0.169277	3.94932e-10	1.78631e-05
ENSG00000137411.12	VARS2	30876018	30323109	G	A	0.115471	rs3130376	Primary	-1.03814	0.167716	6.02129e-10	2.72349e-05
ENSG00000137411.12	VARS2	30876018	30323110	A	C	0.115471	rs3094060	Primary	-1.03814	0.167716	6.02129e-10	2.72349e-05
ENSG00000137411.12	VARS2	30876018	30323393	C	T	0.0997758	rs3130377	Primary	-1.07319	0.180529	2.76917e-09	0.000125253
ENSG00000137411.12	VARS2	30876018	30323976	A	AT	0.119955	.	Primary	-0.893151	0.170994	1.75763e-07	0.00794992
ENSG00000137411.12	VARS2	30876018	30326368	GA	G	0.0997758	.	Primary	-1.07319	0.180529	2.76917e-09	0.000125253
ENSG00000137411.12	VARS2	30876018	30326727	TA	T	0.0997758	rs56722471	Primary	-1.07319	0.180529	2.76917e-09	0.000125253
ENSG00000137411.12	VARS2	30876018	30326804	T	A	0.0997758	rs3094625	Primary	-1.07319	0.180529	2.76917e-09	0.000125253
ENSG00000137411.12	VARS2	30876018	30326809	T	A	0.0997758	rs3094624	Primary	-1.07319	0.180529	2.76917e-09	0.000125253
ENSG00000137411.12	VARS2	30876018	30327194	G	A	0.0997758	rs3094059	Primary	-1.07319	0.180529	2.76917e-09	0.000125253
ENSG00000137411.12	VARS2	30876018	30327196	G	A	0.0997758	rs3094058	Primary	-1.07319	0.180529	2.76917e-09	0.000125253
ENSG00000137411.12	VARS2	30876018	30327839	G	T	0.0997758	rs3130350	Primary	-1.07319	0.180529	2.76917e-09	0.000125253
ENSG00000137411.12	VARS2	30876018	30327952	A	G	0.118834	rs3094622	Primary	-0.871709	0.172774	4.5263e-07	0.0204729
ENSG00000137411.12	VARS2	30876018	30328192	C	T	0.0997758	rs3130351	Primary	-1.07319	0.180529	2.76917e-09	0.000125253
ENSG00000137411.12	VARS2	30876018	30328357	C	T	0.0997758	rs3130352	Primary	-1.07319	0.180529	2.76917e-09	0.000125253
ENSG00000137411.12	VARS2	30876018	30328753	T	C	0.118834	rs3094621	Primary	-0.871709	0.172774	4.5263e-07	0.0204729
ENSG00000137411.12	VARS2	30876018	30329552	T	TTA	0.0997758	.	Primary	-1.07319	0.180529	2.76917e-09	0.000125253
ENSG00000137411.12	VARS2	30876018	30329926	A	T	0.0997758	rs3094620	Primary	-1.07319	0.180529	2.76917e-09	0.000125253
ENSG00000137411.12	VARS2	30876018	30329966	G	A	0.0997758	rs3094057	Primary	-1.07319	0.180529	2.76917e-09	0.000125253
ENSG00000137411.12	VARS2	30876018	30330071	G	A	0.0997758	rs3094056	Primary	-1.07319	0.180529	2.76917e-09	0.000125253
ENSG00000137411.12	VARS2	30876018	30330392	C	G	0.0997758	rs3132648	Primary	-1.07319	0.180529	2.76917e-09	0.000125253
ENSG00000137411.12	VARS2	30876018	30330737	A	G	0.0997758	rs3132647	Primary	-1.07319	0.180529	2.76917e-09	0.000125253
ENSG00000137411.12	VARS2	30876018	30331216	A	T	0.0997758	rs3130353	Primary	-1.07319	0.180529	2.76917e-09	0.000125253
ENSG00000137411.12	VARS2	30876018	30335621	A	G	0.113229	rs3129809	Primary	-0.891842	0.174299	3.10867e-07	0.0140608
ENSG00000137411.12	VARS2	30876018	30336663	T	C	0.0997758	rs114200269	Primary	-1.07319	0.180529	2.76917e-09	0.000125253
ENSG00000137411.12	VARS2	30876018	30337141	G	T	0.0997758	rs3129810	Primary	-1.07319	0.180529	2.76917e-09	0.000125253
ENSG00000137411.12	VARS2	30876018	30337974	G	A	0.0997758	rs3129812	Primary	-1.07319	0.180529	2.76917e-09	0.000125253
ENSG00000137411.12	VARS2	30876018	30340528	G	A	0.0997758	rs3129815	Primary	-1.07319	0.180529	2.76917e-09	0.000125253
ENSG00000137411.12	VARS2	30876018	30340827	A	G	0.113229	rs3130363	Primary	-0.891842	0.174299	3.10867e-07	0.0140608
ENSG00000137411.12	VARS2	30876018	30341390	A	G	0.0997758	rs3130365	Primary	-1.07319	0.180529	2.76917e-09	0.000125253
ENSG00000137411.12	VARS2	30876018	30341471	T	C	0.113229	rs3132638	Primary	-0.891842	0.174299	3.10867e-07	0.0140608
ENSG00000137411.12	VARS2	30876018	30342966	G	T	0.113229	rs3129818	Primary	-0.891842	0.174299	3.10867e-07	0.0140608
ENSG00000137411.12	VARS2	30876018	30343272	A	C	0.105381	rs3132634	Primary	-0.996517	0.177599	2.01109e-08	0.000909638
ENSG00000137411.12	VARS2	30876018	30343569	G	A	0.113229	rs3129820	Primary	-0.891842	0.174299	3.10867e-07	0.0140608
ENSG00000137411.12	VARS2	30876018	30344038	G	A	0.113229	rs3129821	Primary	-0.891842	0.174299	3.10867e-07	0.0140608
ENSG00000137411.12	VARS2	30876018	30344645	C	T	0.113229	rs3132631	Primary	-0.891842	0.174299	3.10867e-07	0.0140608
ENSG00000137411.12	VARS2	30876018	30345118	C	T	0.113229	rs3132630	Primary	-0.891842	0.174299	3.10867e-07	0.0140608
ENSG00000137411.12	VARS2	30876018	30345294	A	G	0.113229	rs3130370	Primary	-0.891842	0.174299	3.10867e-07	0.0140608
ENSG00000137411.12	VARS2	30876018	30346009	A	G	0.113229	rs3130372	Primary	-0.891842	0.174299	3.10867e-07	0.0140608
ENSG00000137411.12	VARS2	30876018	30346208	G	T	0.113229	rs3129822	Primary	-0.891842	0.174299	3.10867e-07	0.0140608
ENSG00000137411.12	VARS2	30876018	30346760	T	A	0.0997758	rs3132627	Primary	-1.07319	0.180529	2.76917e-09	0.000125253
ENSG00000137411.12	VARS2	30876018	30347186	G	A	0.113229	rs3129823	Primary	-0.891842	0.174299	3.10867e-07	0.0140608
ENSG00000137411.12	VARS2	30876018	30347720	A	G	0.113229	rs3132625	Primary	-0.891842	0.174299	3.10867e-07	0.0140608
ENSG00000137411.12	VARS2	30876018	30351348	T	C	0.0997758	rs3094712	Primary	-1.07319	0.180529	2.76917e-09	0.000125253
ENSG00000137411.12	VARS2	30876018	30351547	G	A	0.113229	rs3094032	Primary	-0.891842	0.174299	3.10867e-07	0.0140608
ENSG00000137411.12	VARS2	30876018	30351844	G	A	0.113229	rs3094031	Primary	-0.891842	0.174299	3.10867e-07	0.0140608
ENSG00000137411.12	VARS2	30876018	30352647	G	A	0.113229	rs3130123	Primary	-0.891842	0.174299	3.10867e-07	0.0140608
ENSG00000137411.12	VARS2	30876018	30352875	G	A	0.113229	rs3130125	Primary	-0.891842	0.174299	3.10867e-07	0.0140608
ENSG00000137411.12	VARS2	30876018	30353426	G	A	0.113229	rs3094030	Primary	-0.891842	0.174299	3.10867e-07	0.0140608
ENSG00000137411.12	VARS2	30876018	30353739	C	A	0.113229	rs3130126	Primary	-0.891842	0.174299	3.10867e-07	0.0140608
ENSG00000137411.12	VARS2	30876018	30354416	T	TA	0.113229	rs141748163	Primary	-0.891842	0.174299	3.10867e-07	0.0140608
ENSG00000137411.12	VARS2	30876018	30354913	C	CA	0.0997758	rs202228322	Primary	-1.07319	0.180529	2.76917e-09	0.000125253
ENSG00000137411.12	VARS2	30876018	30355184	A	G	0.113229	rs3094053	Primary	-0.891842	0.174299	3.10867e-07	0.0140608
ENSG00000137411.12	VARS2	30876018	30357294	C	T	0.0997758	rs3094704	Primary	-1.07319	0.180529	2.76917e-09	0.000125253
ENSG00000137411.12	VARS2	30876018	30358591	A	G	0.113229	rs3094050	Primary	-0.891842	0.174299	3.10867e-07	0.0140608
ENSG00000137411.12	VARS2	30876018	30358957	C	T	0.113229	rs3094703	Primary	-0.891842	0.174299	3.10867e-07	0.0140608
ENSG00000137411.12	VARS2	30876018	30359360	G	A	0.113229	rs3094049	Primary	-0.891842	0.174299	3.10867e-07	0.0140608
ENSG00000137411.12	VARS2	30876018	30363085	G	C	0.0997758	rs3094036	Primary	-1.07319	0.180529	2.76917e-09	0.000125253
ENSG00000137411.12	VARS2	30876018	30363136	G	T	0.113229	rs3094035	Primary	-0.891842	0.174299	3.10867e-07	0.0140608
ENSG00000137411.12	VARS2	30876018	30363351	A	T	0.0997758	rs3094034	Primary	-1.07319	0.180529	2.76917e-09	0.000125253
ENSG00000137411.12	VARS2	30876018	30365448	T	C	0.106502	rs3130116	Primary	-0.999289	0.174915	1.10994e-08	0.000502038
ENSG00000137411.12	VARS2	30876018	30365629	C	T	0.179372	rs11961853	Primary	-0.765189	0.139083	3.76179e-08	0.00170149
ENSG00000137411.12	VARS2	30876018	30371118	G	GA	0.102018	.	Primary	-0.99645	0.1795	2.83647e-08	0.00128296
ENSG00000137411.12	VARS2	30876018	30374211	A	G	0.0975336	rs3132619	Primary	-1.07508	0.182107	3.5575e-09	0.000160909
ENSG00000137411.12	VARS2	30876018	30378408	T	C	0.102018	rs3132617	Primary	-0.99645	0.1795	2.83647e-08	0.00128296
ENSG00000137411.12	VARS2	30876018	30381596	T	C	0.102018	rs3131111	Primary	-0.99645	0.1795	2.83647e-08	0.00128296
ENSG00000137411.12	VARS2	30876018	30385746	C	G	0.102018	rs3094717	Primary	-0.99645	0.1795	2.83647e-08	0.00128296
ENSG00000137411.12	VARS2	30876018	30395196	T	C	0.102018	rs3130129	Primary	-0.99645	0.1795	2.83647e-08	0.00128296
ENSG00000137411.12	VARS2	30876018	30409249	T	C	0.102018	rs3132645	Primary	-0.99645	0.1795	2.83647e-08	0.00128296
ENSG00000137411.12	VARS2	30876018	30416456	A	G	0.102018	rs3132616	Primary	-0.99645	0.1795	2.83647e-08	0.00128296
ENSG00000137411.12	VARS2	30876018	30418966	C	A	0.103139	.	Primary	-0.999501	0.178739	2.24541e-08	0.00101562
ENSG00000137411.12	VARS2	30876018	30432177	C	A	0.103139	rs3130141	Primary	-0.999501	0.178739	2.24541e-08	0.00101562
ENSG00000137411.12	VARS2	30876018	30441303	C	T	0.103139	rs3132615	Primary	-0.999501	0.178739	2.24541e-08	0.00101562
ENSG00000137411.12	VARS2	30876018	30447674	A	C	0.102018	rs3131112	Primary	-0.99645	0.1795	2.83647e-08	0.00128296
ENSG00000137411.12	VARS2	30876018	30495860	A	G	0.103139	rs3094024	Primary	-0.976116	0.178791	4.77415e-08	0.0021594
ENSG00000137411.12	VARS2	30876018	30508956	G	A	0.103139	rs3130117	Primary	-0.976116	0.178791	4.77415e-08	0.0021594
ENSG00000137411.12	VARS2	30876018	30515043	T	C	0.103139	rs3130247	Primary	-0.976116	0.178791	4.77415e-08	0.0021594
ENSG00000137411.12	VARS2	30876018	30536872	T	A	0.107623	rs3130241	Primary	-0.87168	0.169568	2.73886e-07	0.0123882
ENSG00000137411.12	VARS2	30876018	30544401	A	G	0.110987	rs3132610	Primary	-0.848104	0.173165	9.69906e-07	0.0438698
ENSG00000137411.12	VARS2	30876018	30566407	A	G	0.103139	rs3095276	Primary	-0.976116	0.178791	4.77415e-08	0.0021594
ENSG00000137411.12	VARS2	30876018	30596421	G	A	0.103139	rs9262126	Primary	-0.976116	0.178791	4.77415e-08	0.0021594
ENSG00000137411.12	VARS2	30876018	30603519	G	A	0.103139	rs9262130	Primary	-0.976116	0.178791	4.77415e-08	0.0021594
ENSG00000137411.12	VARS2	30876018	30611350	C	A	0.103139	rs9262132	Primary	-0.976116	0.178791	4.77415e-08	0.0021594
ENSG00000137411.12	VARS2	30876018	30618906	A	G	0.103139	rs9262135	Primary	-0.976116	0.178791	4.77415e-08	0.0021594
ENSG00000137411.12	VARS2	30876018	30644137	T	C	0.105381	rs9262141	Primary	-0.98673	0.175465	1.87119e-08	0.000846357
ENSG00000137411.12	VARS2	30876018	30650026	G	A	0.103139	rs9262142	Primary	-0.976116	0.178791	4.77415e-08	0.0021594
ENSG00000137411.12	VARS2	30876018	30652781	C	T	0.103139	rs9262143	Primary	-0.976116	0.178791	4.77415e-08	0.0021594
ENSG00000137411.12	VARS2	30876018	30656828	C	G	0.103139	rs9262146	Primary	-0.976116	0.178791	4.77415e-08	0.0021594
ENSG00000137411.12	VARS2	30876018	30666445	CGA	C	0.103139	rs147637345	Primary	-0.976116	0.178791	4.77415e-08	0.0021594
ENSG00000137411.12	VARS2	30876018	30687614	G	C	0.10426	rs3132585	Primary	-0.979604	0.17809	3.78496e-08	0.00171197
ENSG00000137411.12	VARS2	30876018	30688575	G	C	0.10426	rs3132583	Primary	-0.979604	0.17809	3.78496e-08	0.00171197
ENSG00000137411.12	VARS2	30876018	30689001	T	A	0.116592	rs3132582	Primary	-0.865384	0.171255	4.34503e-07	0.019653
ENSG00000137411.12	VARS2	30876018	30694863	CTA	C	0.10426	rs140504225	Primary	-0.979604	0.17809	3.78496e-08	0.00171197
ENSG00000137411.12	VARS2	30876018	30699022	G	A	0.116592	rs3095327	Primary	-0.865384	0.171255	4.34503e-07	0.019653
ENSG00000137411.12	VARS2	30876018	30701092	C	T	0.10426	rs3130658	Primary	-0.979604	0.17809	3.78496e-08	0.00171197
ENSG00000137411.12	VARS2	30876018	30706361	T	A	0.10426	rs3130660	Primary	-0.979604	0.17809	3.78496e-08	0.00171197
ENSG00000137411.12	VARS2	30876018	30708695	C	T	0.10426	rs3130661	Primary	-0.979604	0.17809	3.78496e-08	0.00171197
ENSG00000137411.12	VARS2	30876018	30708955	C	T	0.103139	rs1059612	Primary	-0.976116	0.178791	4.77415e-08	0.0021594
ENSG00000137411.12	VARS2	30876018	30709357	G	A	0.10426	rs3094125	Primary	-0.979604	0.17809	3.78496e-08	0.00171197
ENSG00000137411.12	VARS2	30876018	30717258	C	T	0.0852018	rs3129972	Primary	-0.998419	0.190499	1.59652e-07	0.00722124
ENSG00000137411.12	VARS2	30876018	30721143	C	T	0.106502	rs3129973	Primary	-0.962586	0.17462	3.53879e-08	0.00160063
ENSG00000137411.12	VARS2	30876018	30722267	C	A	0.103139	rs3095332	Primary	-0.990623	0.17603	1.82741e-08	0.000826555
ENSG00000137411.12	VARS2	30876018	30723169	A	G	0.103139	rs3129974	Primary	-0.990623	0.17603	1.82741e-08	0.000826555
ENSG00000137411.12	VARS2	30876018	30723781	G	A	0.103139	rs3095328	Primary	-0.990623	0.17603	1.82741e-08	0.000826555
ENSG00000137411.12	VARS2	30876018	30725841	C	T	0.106502	rs3095326	Primary	-0.962586	0.17462	3.53879e-08	0.00160063
ENSG00000137411.12	VARS2	30876018	30726939	A	C	0.153587	rs3095340	Primary	-0.830977	0.147432	1.73713e-08	0.000785722
ENSG00000137411.12	VARS2	30876018	30728360	T	G	0.217489	rs3094122	Primary	-0.625531	0.127557	9.39392e-07	0.0424896
ENSG00000137411.12	VARS2	30876018	30730339	T	C	0.230942	rs9262172	Primary	-0.675299	0.12453	5.86827e-08	0.00265428
ENSG00000137411.12	VARS2	30876018	30730345	G	C	0.18722	rs9262173	Primary	-0.671055	0.134351	5.88946e-07	0.0266386
ENSG00000137411.12	VARS2	30876018	30730482	G	T	0.119955	rs9262174	Primary	-0.999523	0.162056	6.92554e-10	3.13249e-05
ENSG00000137411.12	VARS2	30876018	30730960	C	T	0.186099	rs3094121	Primary	-0.665947	0.135067	8.2029e-07	0.0371025
ENSG00000137411.12	VARS2	30876018	30731401	A	T	0.121076	rs3095338	Primary	-0.998886	0.163162	9.23689e-10	4.17794e-05
ENSG00000137411.12	VARS2	30876018	30731556	C	T	0.186099	rs3094120	Primary	-0.665947	0.135067	8.2029e-07	0.0371025
ENSG00000137411.12	VARS2	30876018	30731633	C	T	0.186099	rs3094119	Primary	-0.665947	0.135067	8.2029e-07	0.0371025
ENSG00000137411.12	VARS2	30876018	30732054	T	C	0.186099	rs3129975	Primary	-0.665947	0.135067	8.2029e-07	0.0371025
ENSG00000137411.12	VARS2	30876018	30732858	C	T	0.10426	rs3094118	Primary	-1.01228	0.175737	8.40306e-09	0.000380079
ENSG00000137411.12	VARS2	30876018	30733974	G	A	0.184978	rs3131037	Primary	-0.656749	0.135432	1.23896e-06	0.0560393
ENSG00000137411.12	VARS2	30876018	30734041	AT	A	0.288117	.	Primary	-0.574655	0.117072	9.17426e-07	0.0414961
ENSG00000137411.12	VARS2	30876018	30734080	G	A	0.186099	rs3131038	Primary	-0.660212	0.135493	1.10093e-06	0.0497961
ENSG00000137411.12	VARS2	30876018	30734803	TTTTG	T	0.248879	rs60513310	Primary	-0.579132	0.12229	2.1825e-06	0.0987169
ENSG00000137411.12	VARS2	30876018	30735979	C	T	0.10426	rs3130665	Primary	-1.01228	0.175737	8.40306e-09	0.000380079
ENSG00000137411.12	VARS2	30876018	30737486	A	C	0.290359	rs3094117	Primary	-0.609929	0.117897	2.29856e-07	0.0103966
ENSG00000137411.12	VARS2	30876018	30737591	G	C	0.181614	rs3095337	Primary	-0.646901	0.134921	1.6296e-06	0.0737083
ENSG00000137411.12	VARS2	30876018	30737675	GC	G	0.105381	rs9278760	Primary	-0.955193	0.174375	4.30653e-08	0.00194789
ENSG00000137411.12	VARS2	30876018	30738408	A	T	0.273543	rs3094116	Primary	-0.573667	0.118719	1.35081e-06	0.0610987
ENSG00000137411.12	VARS2	30876018	30738446	G	A	0.10426	rs3095336	Primary	-1.01228	0.175737	8.40306e-09	0.000380079
ENSG00000137411.12	VARS2	30876018	30738469	A	G	0.273543	rs3094115	Primary	-0.573667	0.118719	1.35081e-06	0.0610987
ENSG00000137411.12	VARS2	30876018	30738921	A	G	0.273543	rs3094114	Primary	-0.573667	0.118719	1.35081e-06	0.0610987
ENSG00000137411.12	VARS2	30876018	30739846	C	T	0.273543	rs6911628	Primary	-0.573667	0.118719	1.35081e-06	0.0610987
ENSG00000137411.12	VARS2	30876018	30739972	A	C	0.10426	rs3132605	Primary	-1.01228	0.175737	8.40306e-09	0.000380079
ENSG00000137411.12	VARS2	30876018	30741226	C	T	0.178251	rs3132604	Primary	-0.712984	0.138574	2.67304e-07	0.0120904
ENSG00000137411.12	VARS2	30876018	30741305	G	C	0.178251	rs3095335	Primary	-0.712984	0.138574	2.67304e-07	0.0120904
ENSG00000137411.12	VARS2	30876018	30742713	G	C	0.10426	rs3095334	Primary	-1.01228	0.175737	8.40306e-09	0.000380079
ENSG00000137411.12	VARS2	30876018	30743729	G	A	0.103139	rs3130668	Primary	-0.990623	0.17603	1.82741e-08	0.000826555
ENSG00000137411.12	VARS2	30876018	30743739	G	A	0.10426	rs3130669	Primary	-1.01228	0.175737	8.40306e-09	0.000380079
ENSG00000137411.12	VARS2	30876018	30743864	T	G	0.10426	rs3130670	Primary	-1.01228	0.175737	8.40306e-09	0.000380079
ENSG00000137411.12	VARS2	30876018	30744138	G	GC	0.30157	rs9281038	Primary	-0.610424	0.116628	1.65943e-07	0.00750579
ENSG00000137411.12	VARS2	30876018	30744200	C	T	0.10426	rs3132603	Primary	-1.01228	0.175737	8.40306e-09	0.000380079
ENSG00000137411.12	VARS2	30876018	30745633	G	A	0.248879	rs3130671	Primary	-0.677426	0.120875	2.09041e-08	0.000945512
ENSG00000137411.12	VARS2	30876018	30745717	G	T	0.248879	rs3130672	Primary	-0.677426	0.120875	2.09041e-08	0.000945512
ENSG00000137411.12	VARS2	30876018	30745777	T	A	0.234305	rs3132601	Primary	-0.631907	0.125023	4.31876e-07	0.0195342
ENSG00000137411.12	VARS2	30876018	30746331	A	G	0.10426	rs3129978	Primary	-1.01228	0.175737	8.40306e-09	0.000380079
ENSG00000137411.12	VARS2	30876018	30746367	C	T	0.103139	rs3132600	Primary	-0.990623	0.17603	1.82741e-08	0.000826555
ENSG00000137411.12	VARS2	30876018	30746519	G	T	0.10426	rs3130673	Primary	-1.01228	0.175737	8.40306e-09	0.000380079
ENSG00000137411.12	VARS2	30876018	30748164	C	G	0.10426	rs3132599	Primary	-1.01228	0.175737	8.40306e-09	0.000380079
ENSG00000137411.12	VARS2	30876018	30750925	T	A	0.10426	rs3095333	Primary	-1.01228	0.175737	8.40306e-09	0.000380079
ENSG00000137411.12	VARS2	30876018	30755067	C	T	0.10426	rs3131041	Primary	-1.01228	0.175737	8.40306e-09	0.000380079
ENSG00000137411.12	VARS2	30876018	30758371	C	G	0.10426	rs3129980	Primary	-1.01228	0.175737	8.40306e-09	0.000380079
ENSG00000137411.12	VARS2	30876018	30758648	AATGGCC	A	0.10426	rs141083567	Primary	-1.01228	0.175737	8.40306e-09	0.000380079
ENSG00000137411.12	VARS2	30876018	30758664	A	C	0.10426	rs3131044	Primary	-1.01228	0.175737	8.40306e-09	0.000380079
ENSG00000137411.12	VARS2	30876018	30758848	T	A	0.10426	rs3131045	Primary	-1.01228	0.175737	8.40306e-09	0.000380079
ENSG00000137411.12	VARS2	30876018	30758857	C	T	0.13565	rs3129981	Primary	-0.8132	0.158974	3.13239e-07	0.0141681
ENSG00000137411.12	VARS2	30876018	30759335	T	C	0.10426	rs3131047	Primary	-1.01228	0.175737	8.40306e-09	0.000380079
ENSG00000137411.12	VARS2	30876018	30759426	G	A	0.10426	rs3131048	Primary	-1.01228	0.175737	8.40306e-09	0.000380079
ENSG00000137411.12	VARS2	30876018	30759489	A	G	0.10426	rs3131049	Primary	-1.01228	0.175737	8.40306e-09	0.000380079
ENSG00000137411.12	VARS2	30876018	30760025	T	C	0.10426	rs3131050	Primary	-1.01228	0.175737	8.40306e-09	0.000380079
ENSG00000137411.12	VARS2	30876018	30760190	C	T	0.10426	rs3129982	Primary	-1.01228	0.175737	8.40306e-09	0.000380079
ENSG00000137411.12	VARS2	30876018	30760232	A	T	0.10426	rs3131052	Primary	-1.01228	0.175737	8.40306e-09	0.000380079
ENSG00000137411.12	VARS2	30876018	30760276	C	T	0.10426	rs3129983	Primary	-1.01228	0.175737	8.40306e-09	0.000380079
ENSG00000137411.12	VARS2	30876018	30760725	G	A	0.10426	rs9262200	Primary	-1.01228	0.175737	8.40306e-09	0.000380079
ENSG00000137411.12	VARS2	30876018	30760781	A	AC	0.10426	rs9281044	Primary	-1.01228	0.175737	8.40306e-09	0.000380079
ENSG00000137411.12	VARS2	30876018	30760850	T	TA	0.105381	.	Primary	-0.97502	0.175138	2.58946e-08	0.00117124
ENSG00000137411.12	VARS2	30876018	30760907	T	C	0.10426	rs9262202	Primary	-1.01228	0.175737	8.40306e-09	0.000380079
ENSG00000137411.12	VARS2	30876018	30760968	C	T	0.10426	rs9262203	Primary	-1.01228	0.175737	8.40306e-09	0.000380079
ENSG00000137411.12	VARS2	30876018	30761089	G	A	0.10426	rs9262204	Primary	-1.01228	0.175737	8.40306e-09	0.000380079
ENSG00000137411.12	VARS2	30876018	30761132	C	T	0.10426	rs3131054	Primary	-1.01228	0.175737	8.40306e-09	0.000380079
ENSG00000137411.12	VARS2	30876018	30761487	T	C	0.10426	rs3131055	Primary	-1.01228	0.175737	8.40306e-09	0.000380079
ENSG00000137411.12	VARS2	30876018	30761572	C	T	0.103139	rs3129984	Primary	-0.990623	0.17603	1.82741e-08	0.000826555
ENSG00000137411.12	VARS2	30876018	30762238	A	G	0.10426	rs3131058	Primary	-1.01228	0.175737	8.40306e-09	0.000380079
ENSG00000137411.12	VARS2	30876018	30762542	C	T	0.10426	rs3129985	Primary	-1.01228	0.175737	8.40306e-09	0.000380079
ENSG00000137411.12	VARS2	30876018	30763049	T	TAAA	0.10426	rs148331720	Primary	-1.01228	0.175737	8.40306e-09	0.000380079
ENSG00000137411.12	VARS2	30876018	30763291	G	A	0.113229	rs3131060	Primary	-0.907055	0.170814	1.09505e-07	0.00495302
ENSG00000137411.12	VARS2	30876018	30763562	C	T	0.133408	rs3129986	Primary	-0.800881	0.158936	4.67918e-07	0.0211644
ENSG00000137411.12	VARS2	30876018	30763714	T	A	0.133408	rs3131062	Primary	-0.800881	0.158936	4.67918e-07	0.0211644
ENSG00000137411.12	VARS2	30876018	30764081	C	T	0.10426	rs3130641	Primary	-1.01228	0.175737	8.40306e-09	0.000380079
ENSG00000137411.12	VARS2	30876018	30764907	G	A	0.144619	rs1264377	Primary	-0.883471	0.148843	2.92804e-09	0.000132438
ENSG00000137411.12	VARS2	30876018	30765579	C	A	0.128924	rs1264376	Primary	-0.977008	0.156871	4.72122e-10	2.13546e-05
ENSG00000137411.12	VARS2	30876018	30769273	G	A	0.107623	rs1264373	Primary	-0.903721	0.172313	1.56587e-07	0.00708257
ENSG00000137411.12	VARS2	30876018	30777498	A	G	0.112108	rs1264361	Primary	-0.820836	0.167859	1.00817e-06	0.0456003
ENSG00000137411.12	VARS2	30876018	30780568	C	T	0.108744	rs2524266	Primary	-0.844297	0.171592	8.63785e-07	0.0390699
ENSG00000137411.12	VARS2	30876018	30781301	T	C	0.109865	rs886425	Primary	-0.865663	0.171452	4.44134e-07	0.0200886
ENSG00000137411.12	VARS2	30876018	30782002	C	T	0.109865	rs886424	Primary	-0.865663	0.171452	4.44134e-07	0.0200886
ENSG00000137411.12	VARS2	30876018	30783284	G	GT	0.109865	.	Primary	-0.865663	0.171452	4.44134e-07	0.0200886
ENSG00000137411.12	VARS2	30876018	30784068	C	T	0.109865	rs1264356	Primary	-0.865663	0.171452	4.44134e-07	0.0200886
ENSG00000137411.12	VARS2	30876018	30784193	G	A	0.109865	rs1264355	Primary	-0.865663	0.171452	4.44134e-07	0.0200886
ENSG00000137411.12	VARS2	30876018	30787762	C	A	0.109865	rs1264353	Primary	-0.865663	0.171452	4.44134e-07	0.0200886
ENSG00000137411.12	VARS2	30876018	30792117	G	C	0.107623	rs1264351	Primary	-0.903721	0.172313	1.56587e-07	0.00708257
ENSG00000137411.12	VARS2	30876018	30796545	T	C	0.119955	rs1264350	Primary	-0.861948	0.163528	1.35712e-07	0.00613838
ENSG00000137411.12	VARS2	30876018	30796659	A	G	0.107623	rs1264349	Primary	-0.903721	0.172313	1.56587e-07	0.00708257
ENSG00000137411.12	VARS2	30876018	30798697	C	T	0.105381	rs1264347	Primary	-0.975814	0.169253	8.14601e-09	0.000368452
ENSG00000137411.12	VARS2	30876018	30802017	C	A	0.375561	rs1264342	Primary	0.670541	0.109458	9.01148e-10	4.07598e-05
ENSG00000137411.12	VARS2	30876018	30802465	T	C	0.105381	rs1264341	Primary	-0.978485	0.170231	9.03206e-09	0.000408529
ENSG00000137411.12	VARS2	30876018	30803526	A	G	0.105381	rs1110482	Primary	-0.978485	0.170231	9.03206e-09	0.000408529
ENSG00000137411.12	VARS2	30876018	30810056	G	A	0.295964	rs2517580	Primary	0.589179	0.115081	3.06012e-07	0.0138412
ENSG00000137411.12	VARS2	30876018	30810084	A	G	0.377803	rs2535337	Primary	0.673342	0.110946	1.2864e-09	5.81851e-05
ENSG00000137411.12	VARS2	30876018	30810654	A	C	0.39574	rs2535336	Primary	0.636384	0.109948	7.12004e-09	0.000322046
ENSG00000137411.12	VARS2	30876018	30811164	C	A	0.293722	rs2517579	Primary	0.579084	0.115278	5.07699e-07	0.0229637
ENSG00000137411.12	VARS2	30876018	30811265	G	C	0.105381	rs2517578	Primary	-0.978485	0.170231	9.03206e-09	0.000408529
ENSG00000137411.12	VARS2	30876018	30812497	A	G	0.39574	rs2535335	Primary	0.636384	0.109948	7.12004e-09	0.000322046
ENSG00000137411.12	VARS2	30876018	30812996	G	A	0.105381	rs2535334	Primary	-0.978485	0.170231	9.03206e-09	0.000408529
ENSG00000137411.12	VARS2	30876018	30813097	G	A	0.195067	rs2535333	Primary	-0.951904	0.125718	3.68594e-14	1.66719e-09
ENSG00000137411.12	VARS2	30876018	30813249	C	T	0.105381	rs2535332	Primary	-0.978485	0.170231	9.03206e-09	0.000408529
ENSG00000137411.12	VARS2	30876018	30813292	C	A	0.375561	rs2517577	Primary	0.661377	0.111013	2.55878e-09	0.000115736
ENSG00000137411.12	VARS2	30876018	30815035	G	A	0.195067	rs2517576	Primary	-0.951904	0.125718	3.68594e-14	1.66719e-09
ENSG00000137411.12	VARS2	30876018	30815945	C	T	0.378924	rs2844664	Primary	0.682193	0.111299	8.82381e-10	3.9911e-05
ENSG00000137411.12	VARS2	30876018	30815951	C	T	0.39574	rs2844663	Primary	0.636384	0.109948	7.12004e-09	0.000322046
ENSG00000137411.12	VARS2	30876018	30816270	G	A	0.375561	rs2535331	Primary	0.661377	0.111013	2.55878e-09	0.000115736
ENSG00000137411.12	VARS2	30876018	30817879	C	T	0.39574	rs2844662	Primary	0.636384	0.109948	7.12004e-09	0.000322046
ENSG00000137411.12	VARS2	30876018	30819465	A	G	0.39574	rs2517575	Primary	0.636384	0.109948	7.12004e-09	0.000322046
ENSG00000137411.12	VARS2	30876018	30820373	C	T	0.103139	rs2263298	Primary	-0.954602	0.173176	3.54115e-08	0.0016017
ENSG00000137411.12	VARS2	30876018	30821522	C	T	0.105381	rs2844661	Primary	-0.978485	0.170231	9.03206e-09	0.000408529
ENSG00000137411.12	VARS2	30876018	30822002	GAC	G	0.0986547	rs149894926	Primary	-0.925757	0.169478	4.69775e-08	0.00212484
ENSG00000137411.12	VARS2	30876018	30824532	C	T	0.195067	rs2844659	Primary	-0.951904	0.125718	3.68594e-14	1.66719e-09
ENSG00000137411.12	VARS2	30876018	30824642	C	T	0.375561	rs2535330	Primary	0.661377	0.111013	2.55878e-09	0.000115736
ENSG00000137411.12	VARS2	30876018	30825812	G	A	0.375561	rs2844658	Primary	0.661377	0.111013	2.55878e-09	0.000115736
ENSG00000137411.12	VARS2	30876018	30825994	C	T	0.105381	rs2535328	Primary	-0.978485	0.170231	9.03206e-09	0.000408529
ENSG00000137411.12	VARS2	30876018	30826904	T	C	0.359865	rs2535327	Primary	0.695926	0.112036	5.24317e-10	2.37154e-05
ENSG00000137411.12	VARS2	30876018	30826945	GA	G	0.105381	rs9278783	Primary	-0.978485	0.170231	9.03206e-09	0.000408529
ENSG00000137411.12	VARS2	30876018	30829522	A	G	0.195067	rs2844657	Primary	-0.951904	0.125718	3.68594e-14	1.66719e-09
ENSG00000137411.12	VARS2	30876018	30831195	G	A	0.105381	rs3132577	Primary	-0.978485	0.170231	9.03206e-09	0.000408529
ENSG00000137411.12	VARS2	30876018	30832063	C	T	0.39574	rs2535326	Primary	0.636384	0.109948	7.12004e-09	0.000322046
ENSG00000137411.12	VARS2	30876018	30833081	C	T	0.375561	rs2535325	Primary	0.661377	0.111013	2.55878e-09	0.000115736
ENSG00000137411.12	VARS2	30876018	30833949	GGCCCA	G	0.105381	.	Primary	-0.978485	0.170231	9.03206e-09	0.000408529
ENSG00000137411.12	VARS2	30876018	30833957	T	TGCGGGC	0.105381	.	Primary	-0.978485	0.170231	9.03206e-09	0.000408529
ENSG00000137411.12	VARS2	30876018	30834331	A	G	0.105381	rs2844656	Primary	-0.978485	0.170231	9.03206e-09	0.000408529
ENSG00000137411.12	VARS2	30876018	30836489	TC	T	0.375561	rs9278786	Primary	0.661377	0.111013	2.55878e-09	0.000115736
ENSG00000137411.12	VARS2	30876018	30837538	G	C	0.359865	rs2844655	Primary	0.695926	0.112036	5.24317e-10	2.37154e-05
ENSG00000137411.12	VARS2	30876018	30837646	T	C	0.375561	rs3130657	Primary	0.661377	0.111013	2.55878e-09	0.000115736
ENSG00000137411.12	VARS2	30876018	30838043	G	C	0.196188	rs2535341	Primary	-0.877208	0.120673	3.61489e-13	1.63505e-08
ENSG00000137411.12	VARS2	30876018	30838497	T	C	0.105381	rs2535340	Primary	-0.978485	0.170231	9.03206e-09	0.000408529
ENSG00000137411.12	VARS2	30876018	30838688	T	G	0.375561	rs2844654	Primary	0.661377	0.111013	2.55878e-09	0.000115736
ENSG00000137411.12	VARS2	30876018	30839430	C	T	0.375561	rs2535339	Primary	0.661377	0.111013	2.55878e-09	0.000115736
ENSG00000137411.12	VARS2	30876018	30840147	T	C	0.39574	rs2517573	Primary	0.636384	0.109948	7.12004e-09	0.000322046
ENSG00000137411.12	VARS2	30876018	30842095	TA	T	0.375561	rs370737332	Primary	0.661377	0.111013	2.55878e-09	0.000115736
ENSG00000137411.12	VARS2	30876018	30842629	C	T	0.105381	rs2517572	Primary	-0.978485	0.170231	9.03206e-09	0.000408529
ENSG00000137411.12	VARS2	30876018	30842674	C	T	0.359865	rs2535329	Primary	0.695926	0.112036	5.24317e-10	2.37154e-05
ENSG00000137411.12	VARS2	30876018	30844260	G	A	0.39574	rs1264334	Primary	0.636384	0.109948	7.12004e-09	0.000322046
ENSG00000137411.12	VARS2	30876018	30844314	T	C	0.375561	rs1264333	Primary	0.661377	0.111013	2.55878e-09	0.000115736
ENSG00000137411.12	VARS2	30876018	30845563	G	C	0.374439	rs1264332	Primary	0.661973	0.111631	3.02881e-09	0.000136996
ENSG00000137411.12	VARS2	30876018	30846830	G	T	0.375561	rs1264331	Primary	0.661377	0.111013	2.55878e-09	0.000115736
ENSG00000137411.12	VARS2	30876018	30850582	G	A	0.359865	rs1264327	Primary	0.695926	0.112036	5.24317e-10	2.37154e-05
ENSG00000137411.12	VARS2	30876018	30851909	C	A	0.105381	rs1264326	Primary	-0.978485	0.170231	9.03206e-09	0.000408529
ENSG00000137411.12	VARS2	30876018	30851989	G	A	0.102018	rs1264325	Primary	-0.917159	0.17146	8.83853e-08	0.00399775
ENSG00000137411.12	VARS2	30876018	30855211	T	G	0.103139	rs1264324	Primary	-0.954602	0.173176	3.54115e-08	0.0016017
ENSG00000137411.12	VARS2	30876018	30857894	G	A	0.105381	rs1264322	Primary	-0.978485	0.170231	9.03206e-09	0.000408529
ENSG00000137411.12	VARS2	30876018	30859344	G	A	0.103139	rs1264321	Primary	-0.954602	0.173176	3.54115e-08	0.0016017
ENSG00000137411.12	VARS2	30876018	30861000	C	T	0.373318	rs1264320	Primary	0.646875	0.111233	6.04554e-09	0.000273446
ENSG00000137411.12	VARS2	30876018	30862423	C	T	0.201794	rs1264319	Primary	-0.943969	0.124683	3.70814e-14	1.67723e-09
ENSG00000137411.12	VARS2	30876018	30863530	C	G	0.201794	rs1264318	Primary	-0.943969	0.124683	3.70814e-14	1.67723e-09
ENSG00000137411.12	VARS2	30876018	30864279	C	T	0.105381	rs886422	Primary	-0.978485	0.170231	9.03206e-09	0.000408529
ENSG00000137411.12	VARS2	30876018	30864700	C	T	0.373318	rs1264317	Primary	0.646875	0.111233	6.04554e-09	0.000273446
ENSG00000137411.12	VARS2	30876018	30865058	C	T	0.290359	rs1264315	Primary	0.570717	0.115622	7.97194e-07	0.0360579
ENSG00000137411.12	VARS2	30876018	30867527	G	A	0.105381	rs1049633	Primary	-0.978485	0.170231	9.03206e-09	0.000408529
ENSG00000137411.12	VARS2	30876018	30872783	C	T	0.105381	rs1264313	Primary	-0.978485	0.170231	9.03206e-09	0.000408529
ENSG00000137411.12	VARS2	30876018	30872982	G	A	0.105381	rs1264312	Primary	-0.978485	0.170231	9.03206e-09	0.000408529
ENSG00000137411.12	VARS2	30876018	30873041	G	A	0.371076	rs1264311	Primary	0.643935	0.111192	6.9895e-09	0.000316142
ENSG00000137411.12	VARS2	30876018	30873605	C	A	0.105381	rs1264310	Primary	-0.978485	0.170231	9.03206e-09	0.000408529
ENSG00000137411.12	VARS2	30876018	30875899	A	G	0.376682	rs1264309	Primary	0.67968	0.110028	6.52038e-10	2.94923e-05
ENSG00000137411.12	VARS2	30876018	30879636	C	T	0.103139	rs886420	Primary	-0.954602	0.173176	3.54115e-08	0.0016017
ENSG00000137411.12	VARS2	30876018	30879987	C	T	0.105381	rs1264308	Primary	-0.978485	0.170231	9.03206e-09	0.000408529
ENSG00000137411.12	VARS2	30876018	30880757	G	A	0.374439	rs1264307	Primary	0.665413	0.110268	1.59456e-09	7.21235e-05
ENSG00000137411.12	VARS2	30876018	30882203	T	C	0.605381	rs1264306	Primary	0.904703	0.10308	3.68594e-14	1.66719e-09
ENSG00000137411.12	VARS2	30876018	30882277	C	T	0.376682	rs1264305	Primary	0.67968	0.110028	6.52038e-10	2.94923e-05
ENSG00000137411.12	VARS2	30876018	30882415	C	T	0.105381	rs1264304	Primary	-0.978485	0.170231	9.03206e-09	0.000408529
ENSG00000137411.12	VARS2	30876018	30882513	A	G	0.376682	rs1264303	Primary	0.67968	0.110028	6.52038e-10	2.94923e-05
ENSG00000137411.12	VARS2	30876018	30882634	C	T	0.376682	rs1264302	Primary	0.67968	0.110028	6.52038e-10	2.94923e-05
ENSG00000137411.12	VARS2	30876018	30882781	G	T	0.376682	rs1264301	Primary	0.67968	0.110028	6.52038e-10	2.94923e-05
ENSG00000137411.12	VARS2	30876018	30882856	A	G	0.376682	rs1264300	Primary	0.67968	0.110028	6.52038e-10	2.94923e-05
ENSG00000137411.12	VARS2	30876018	30883920	C	T	0.376682	rs1264299	Primary	0.67968	0.110028	6.52038e-10	2.94923e-05
ENSG00000137411.12	VARS2	30876018	30884251	G	A	0.358744	rs41266876	Primary	0.687634	0.112138	8.67732e-10	3.92484e-05
ENSG00000137411.12	VARS2	30876018	30884253	G	A	0.375561	rs9262287	Primary	0.729569	0.112091	7.57914e-11	3.42812e-06
ENSG00000137411.12	VARS2	30876018	30884331	CG	C	0.376682	.	Primary	0.67968	0.110028	6.52038e-10	2.94923e-05
ENSG00000137411.12	VARS2	30876018	30884436	A	G	0.376682	rs1264298	Primary	0.67968	0.110028	6.52038e-10	2.94923e-05
ENSG00000137411.12	VARS2	30876018	30884806	A	C	0.376682	rs1264297	Primary	0.67968	0.110028	6.52038e-10	2.94923e-05
ENSG00000137411.12	VARS2	30876018	30885639	A	G	0.376682	rs9262288	Primary	0.67968	0.110028	6.52038e-10	2.94923e-05
ENSG00000137411.12	VARS2	30876018	30885686	T	A	0.376682	rs9262289	Primary	0.67968	0.110028	6.52038e-10	2.94923e-05
ENSG00000137411.12	VARS2	30876018	30885821	G	A	0.376682	rs9262290	Primary	0.67968	0.110028	6.52038e-10	2.94923e-05
ENSG00000137411.12	VARS2	30876018	30885839	TTTTG	T	0.376682	rs147192830	Primary	0.67968	0.110028	6.52038e-10	2.94923e-05
ENSG00000137411.12	VARS2	30876018	30886015	T	G	0.376682	rs9262291	Primary	0.67968	0.110028	6.52038e-10	2.94923e-05
ENSG00000137411.12	VARS2	30876018	30886079	G	A	0.376682	rs9262292	Primary	0.67968	0.110028	6.52038e-10	2.94923e-05
ENSG00000137411.12	VARS2	30876018	30886350	C	G	0.376682	rs9262293	Primary	0.67968	0.110028	6.52038e-10	2.94923e-05
ENSG00000137411.12	VARS2	30876018	30887207	C	T	0.376682	rs9262294	Primary	0.67968	0.110028	6.52038e-10	2.94923e-05
ENSG00000137411.12	VARS2	30876018	30887311	C	T	0.375561	rs7756286	Primary	0.693787	0.110396	3.2885e-10	1.48742e-05
ENSG00000137411.12	VARS2	30876018	30887344	T	C	0.375561	rs7738138	Primary	0.693787	0.110396	3.2885e-10	1.48742e-05
ENSG00000137411.12	VARS2	30876018	30887780	C	CTGGGGCGGTGCAGGTGA	0.589686	rs150739982	Primary	0.938339	0.103243	3.68594e-14	1.66719e-09
ENSG00000137411.12	VARS2	30876018	30887988	C	T	0.376682	rs2249459	Primary	0.67968	0.110028	6.52038e-10	2.94923e-05
ENSG00000137411.12	VARS2	30876018	30888161	T	C	0.597534	rs2249464	Primary	0.928261	0.101895	3.68594e-14	1.66719e-09
ENSG00000137411.12	VARS2	30876018	30888169	G	A	0.376682	rs2517468	Primary	0.67968	0.110028	6.52038e-10	2.94923e-05
ENSG00000137411.12	VARS2	30876018	30889120	A	G	0.376682	rs2532943	Primary	0.67968	0.110028	6.52038e-10	2.94923e-05
ENSG00000137411.12	VARS2	30876018	30889260	G	A	0.597534	rs2517467	Primary	0.928261	0.101895	3.68594e-14	1.66719e-09
ENSG00000137411.12	VARS2	30876018	30890055	T	C	0.376682	rs2517466	Primary	0.67968	0.110028	6.52038e-10	2.94923e-05
ENSG00000137411.12	VARS2	30876018	30890206	T	C	0.376682	rs887381	Primary	0.67968	0.110028	6.52038e-10	2.94923e-05
ENSG00000137411.12	VARS2	30876018	30890483	G	T	0.376682	rs2074506	Primary	0.67968	0.110028	6.52038e-10	2.94923e-05
ENSG00000137411.12	VARS2	30876018	30890569	G	T	0.376682	rs753726	Primary	0.67968	0.110028	6.52038e-10	2.94923e-05
ENSG00000137411.12	VARS2	30876018	30890871	T	C	0.597534	rs753725	Primary	0.928261	0.101895	3.68594e-14	1.66719e-09
ENSG00000137411.12	VARS2	30876018	30891704	C	CCG	0.376682	rs10653650	Primary	0.67968	0.110028	6.52038e-10	2.94923e-05
ENSG00000137411.12	VARS2	30876018	30891795	G	GTGC	0.376682	rs9281080	Primary	0.67968	0.110028	6.52038e-10	2.94923e-05
ENSG00000137411.12	VARS2	30876018	30892322	C	T	0.376682	rs2532942	Primary	0.67968	0.110028	6.52038e-10	2.94923e-05
ENSG00000137411.12	VARS2	30876018	30892377	G	C	0.376682	rs2252760	Primary	0.67968	0.110028	6.52038e-10	2.94923e-05
ENSG00000137411.12	VARS2	30876018	30892592	G	C	0.376682	rs2532940	Primary	0.67968	0.110028	6.52038e-10	2.94923e-05
ENSG00000137411.12	VARS2	30876018	30893226	C	G	0.376682	rs2532939	Primary	0.67968	0.110028	6.52038e-10	2.94923e-05
ENSG00000137411.12	VARS2	30876018	30893251	G	A	0.376682	rs2252856	Primary	0.67968	0.110028	6.52038e-10	2.94923e-05
ENSG00000137411.12	VARS2	30876018	30893428	G	A	0.376682	rs2252863	Primary	0.67968	0.110028	6.52038e-10	2.94923e-05
ENSG00000137411.12	VARS2	30876018	30893831	G	A	0.376682	rs2532938	Primary	0.67968	0.110028	6.52038e-10	2.94923e-05
ENSG00000137411.12	VARS2	30876018	30893941	G	A	0.172646	rs4678	Primary	-0.929643	0.133385	3.17801e-12	1.43745e-07
ENSG00000137411.12	VARS2	30876018	30894344	G	A	0.376682	rs2532937	Primary	0.67968	0.110028	6.52038e-10	2.94923e-05
ENSG00000137411.12	VARS2	30876018	30894408	A	C	0.376682	rs2532936	Primary	0.67968	0.110028	6.52038e-10	2.94923e-05
ENSG00000137411.12	VARS2	30876018	30894416	GACTA	G	0.376682	rs376115804	Primary	0.67968	0.110028	6.52038e-10	2.94923e-05
ENSG00000137411.12	VARS2	30876018	30894573	C	T	0.376682	rs2532935	Primary	0.67968	0.110028	6.52038e-10	2.94923e-05
ENSG00000137411.12	VARS2	30876018	30894759	G	A	0.597534	rs2532934	Primary	0.928261	0.101895	3.68594e-14	1.66719e-09
ENSG00000137411.12	VARS2	30876018	30894965	T	A	0.105381	rs3094088	Primary	-0.978485	0.170231	9.03206e-09	0.000408529
ENSG00000137411.12	VARS2	30876018	30895264	C	T	0.376682	rs2517463	Primary	0.67968	0.110028	6.52038e-10	2.94923e-05
ENSG00000137411.12	VARS2	30876018	30895293	A	G	0.374439	rs2532933	Primary	0.699284	0.110262	2.26749e-10	1.02561e-05
ENSG00000137411.12	VARS2	30876018	30895592	G	A	0.376682	rs2394856	Primary	0.67968	0.110028	6.52038e-10	2.94923e-05
ENSG00000137411.12	VARS2	30876018	30895725	G	A	0.376682	rs2532930	Primary	0.67968	0.110028	6.52038e-10	2.94923e-05
ENSG00000137411.12	VARS2	30876018	30896190	T	C	0.376682	rs2517462	Primary	0.67968	0.110028	6.52038e-10	2.94923e-05
ENSG00000137411.12	VARS2	30876018	30896399	T	C	0.377803	rs2517461	Primary	0.671178	0.110443	1.22352e-09	5.53412e-05
ENSG00000137411.12	VARS2	30876018	30897774	A	G	0.436099	rs2532929	Primary	0.757222	0.102572	1.55542e-13	7.03533e-09
ENSG00000137411.12	VARS2	30876018	30898295	A	G	0.376682	rs2532928	Primary	0.67968	0.110028	6.52038e-10	2.94923e-05
ENSG00000137411.12	VARS2	30876018	30898434	A	G	0.376682	rs2532927	Primary	0.67968	0.110028	6.52038e-10	2.94923e-05
ENSG00000137411.12	VARS2	30876018	30898441	A	G	0.376682	rs2532926	Primary	0.67968	0.110028	6.52038e-10	2.94923e-05
ENSG00000137411.12	VARS2	30876018	30898442	C	T	0.376682	rs2517457	Primary	0.67968	0.110028	6.52038e-10	2.94923e-05
ENSG00000137411.12	VARS2	30876018	30898687	C	T	0.376682	rs2844652	Primary	0.67968	0.110028	6.52038e-10	2.94923e-05
ENSG00000137411.12	VARS2	30876018	30899051	G	C	0.105381	rs3095155	Primary	-0.978485	0.170231	9.03206e-09	0.000408529
ENSG00000137411.12	VARS2	30876018	30899052	G	A	0.172646	rs3095154	Primary	-0.929643	0.133385	3.17801e-12	1.43745e-07
ENSG00000137411.12	VARS2	30876018	30899195	G	A	0.113229	rs3095153	Primary	-0.972403	0.163544	2.75109e-09	0.000124435
ENSG00000137411.12	VARS2	30876018	30899524	T	C	0.172646	rs3131787	Primary	-0.929643	0.133385	3.17801e-12	1.43745e-07
ENSG00000137411.12	VARS2	30876018	30899650	G	A	0.113229	rs3095152	Primary	-0.972403	0.163544	2.75109e-09	0.000124435
ENSG00000137411.12	VARS2	30876018	30900150	G	T	0.174888	rs3095151	Primary	-0.931519	0.132917	2.41274e-12	1.0913e-07
ENSG00000137411.12	VARS2	30876018	30900664	T	C	0.568386	rs2844651	Primary	0.879008	0.101563	3.68594e-14	1.66719e-09
ENSG00000137411.12	VARS2	30876018	30901872	C	G	0.355381	rs3131786	Primary	-0.872618	0.102456	3.68594e-14	1.66719e-09
ENSG00000137411.12	VARS2	30876018	30901895	C	G	0.533632	rs3131785	Primary	-0.568852	0.102563	2.91683e-08	0.00131931
ENSG00000137411.12	VARS2	30876018	30903445	GT	GTT	0.369955	.	Primary	0.611875	0.114785	9.78851e-08	0.00442744
ENSG00000137411.12	VARS2	30876018	30903948	C	T	0.532511	rs3131784	Primary	-0.561777	0.102947	4.84415e-08	0.00219106
ENSG00000137411.12	VARS2	30876018	30905313	A	G	0.352018	rs3132571	Primary	-0.864325	0.103124	3.68594e-14	1.66719e-09
ENSG00000137411.12	VARS2	30876018	30907335	T	C	0.140135	rs3131921	Primary	-0.737828	0.152725	1.35779e-06	0.0614143
ENSG00000137411.12	VARS2	30876018	30909382	ACCTG	A	0.223094	rs147854926	Primary	-0.858519	0.121196	1.4031e-12	6.34636e-08
ENSG00000137411.12	VARS2	30876018	30909408	T	C	0.380045	rs2243739	Primary	0.663328	0.110254	1.78375e-09	8.06808e-05
ENSG00000137411.12	VARS2	30876018	30912481	G	A	0.378924	rs2844702	Primary	0.67198	0.109854	9.53502e-10	4.31279e-05
ENSG00000137411.12	VARS2	30876018	30913458	G	A	0.110987	rs3132581	Primary	-0.949829	0.166193	1.09556e-08	0.000495534
ENSG00000137411.12	VARS2	30876018	30914552	T	C	0.178251	rs3130781	Primary	-0.877739	0.133977	5.69925e-11	2.57783e-06
ENSG00000137411.12	VARS2	30876018	30914843	C	T	0.143498	rs3130782	Primary	-0.886922	0.147974	2.05013e-09	9.27293e-05
ENSG00000137411.12	VARS2	30876018	30919391	G	A	0.110987	rs3094086	Primary	-0.949829	0.166193	1.09556e-08	0.000495534
ENSG00000137411.12	VARS2	30876018	30919701	T	C	0.376682	rs2517449	Primary	0.677926	0.109447	5.86146e-10	2.6512e-05
ENSG00000137411.12	VARS2	30876018	30920124	G	A	0.110987	rs3132580	Primary	-0.949829	0.166193	1.09556e-08	0.000495534
ENSG00000137411.12	VARS2	30876018	30920890	G	A	0.363229	rs2240804	Primary	0.704593	0.110718	1.96766e-10	8.89992e-06
ENSG00000137411.12	VARS2	30876018	30922088	G	A	0.225336	rs3094085	Primary	-0.847024	0.120103	1.75726e-12	7.94827e-08
ENSG00000137411.12	VARS2	30876018	30922570	C	G	0.373318	rs2532921	Primary	0.658464	0.109552	1.84932e-09	8.36464e-05
ENSG00000137411.12	VARS2	30876018	30923411	CG	C	0.223094	.	Primary	-0.872925	0.120915	5.22471e-13	2.36319e-08
ENSG00000137411.12	VARS2	30876018	30923527	C	T	0.363229	rs17189763	Primary	0.704593	0.110718	1.96766e-10	8.89992e-06
ENSG00000137411.12	VARS2	30876018	30923629	C	T	0.378924	rs2532920	Primary	0.67198	0.109854	9.53502e-10	4.31279e-05
ENSG00000137411.12	VARS2	30876018	30926517	C	T	0.103139	rs3095156	Primary	-0.954602	0.173176	3.54115e-08	0.0016017
ENSG00000137411.12	VARS2	30876018	30931245	C	T	0.371076	rs2844698	Primary	0.690999	0.11322	1.03997e-09	4.70388e-05
ENSG00000137411.12	VARS2	30876018	30931844	T	C	0.144619	rs3131934	Primary	-0.893321	0.147009	1.22724e-09	5.55093e-05
ENSG00000137411.12	VARS2	30876018	30932068	G	A	0.150224	rs3131783	Primary	-0.892298	0.143017	4.40023e-10	1.99027e-05
ENSG00000137411.12	VARS2	30876018	30933794	G	T	0.173767	rs3095089	Primary	-0.810428	0.138518	4.89501e-09	0.000221406
ENSG00000137411.12	VARS2	30876018	30937732	A	G	0.108744	rs3131781	Primary	-0.910745	0.171167	1.03321e-07	0.00467331
ENSG00000137411.12	VARS2	30876018	30940989	T	C	0.143498	rs3132579	Primary	-0.876843	0.152088	8.14779e-09	0.000368533
ENSG00000137411.12	VARS2	30876018	30947509	A	T	0.140135	rs3094084	Primary	-0.896868	0.152341	3.92647e-09	0.000177598
ENSG00000137411.12	VARS2	30876018	30951561	T	C	0.143498	rs1634714	Primary	-0.876843	0.152088	8.14779e-09	0.000368533
ENSG00000137411.12	VARS2	30876018	30962469	T	C	0.142377	rs1632864	Primary	-0.869583	0.152186	1.10395e-08	0.00049933
ENSG00000137411.12	VARS2	30876018	30969754	G	A	0.107623	rs1634716	Primary	-0.904749	0.171549	1.33488e-07	0.0060378
ENSG00000137411.12	VARS2	30876018	30971769	A	G	0.142377	rs1632855	Primary	-0.869583	0.152186	1.10395e-08	0.00049933
ENSG00000137411.12	VARS2	30876018	30977680	G	A	0.107623	rs1634721	Primary	-0.904749	0.171549	1.33488e-07	0.0060378
ENSG00000137411.12	VARS2	30876018	30985828	G	A	0.107623	rs1634726	Primary	-0.904749	0.171549	1.33488e-07	0.0060378
ENSG00000137411.12	VARS2	30876018	30986312	C	T	0.142377	rs1345230	Primary	-0.869583	0.152186	1.10395e-08	0.00049933
ENSG00000137411.12	VARS2	30876018	30988825	G	A	0.139013	rs1628680	Primary	-0.889464	0.152434	5.37698e-09	0.000243206
ENSG00000137411.12	VARS2	30876018	31016550	A	G	0.10426	rs3130574	Primary	-0.860801	0.174774	8.42686e-07	0.0381155
ENSG00000137411.12	VARS2	30876018	31018908	T	G	0.10426	rs3131920	Primary	-0.860801	0.174774	8.42686e-07	0.0381155
ENSG00000137411.12	VARS2	30876018	31020657	AAAGAAAGAAAGAAAGAAAGAAAGGAAGG	A	0.0975336	.	Primary	-0.877349	0.182323	1.4938e-06	0.067566
ENSG00000137411.12	VARS2	30876018	31021078	A	G	0.35426	rs2517528	Primary	-0.548132	0.112234	1.04042e-06	0.0470593
ENSG00000137411.12	VARS2	30876018	31024796	G	A	0.10426	rs3131788	Primary	-0.860801	0.174774	8.42686e-07	0.0381155
ENSG00000137411.12	VARS2	30876018	31037872	TTTTC	T	0.10426	rs200744629	Primary	-0.860801	0.174774	8.42686e-07	0.0381155
ENSG00000137411.12	VARS2	30876018	31044463	T	C	0.10426	rs3094671	Primary	-0.860801	0.174774	8.42686e-07	0.0381155
ENSG00000137411.12	VARS2	30876018	31051675	A	G	0.10426	rs3095311	Primary	-0.860801	0.174774	8.42686e-07	0.0381155
ENSG00000137411.12	VARS2	30876018	31058340	C	A	0.10426	rs3130544	Primary	-0.860801	0.174774	8.42686e-07	0.0381155
ENSG00000137411.12	VARS2	30876018	31061561	T	C	0.121076	rs3094087	Primary	-0.822357	0.163429	4.85622e-07	0.0219652
ENSG00000137411.12	VARS2	30876018	31065071	C	T	0.121076	rs3130968	Primary	-0.822357	0.163429	4.85622e-07	0.0219652
ENSG00000137411.12	VARS2	30876018	31066627	GACA	G	0.11435	rs201376697	Primary	-0.881131	0.164226	8.07909e-08	0.00365425
ENSG00000137411.12	VARS2	30876018	31066633	A	G	0.11435	rs144846110	Primary	-0.881131	0.164226	8.07909e-08	0.00365425
ENSG00000137411.12	VARS2	30876018	31072695	T	C	0.10426	rs9263610	Primary	-0.860801	0.174774	8.42686e-07	0.0381155
ENSG00000137411.12	VARS2	30876018	31079644	G	A	0.10426	rs2233980	Primary	-0.860801	0.174774	8.42686e-07	0.0381155
ENSG00000137411.12	VARS2	30876018	31081434	A	G	0.106502	rs3094222	Primary	-0.855835	0.172663	7.17119e-07	0.032436
ENSG00000137411.12	VARS2	30876018	31085356	C	T	0.102018	rs3130985	Primary	-0.845022	0.176907	1.7824e-06	0.08062
ENSG00000137411.12	VARS2	30876018	31172151	T	C	0.0952915	rs3132510	Primary	-0.912264	0.18141	4.93704e-07	0.0223307
ENSG00000137411.12	VARS2	30876018	31288877	T	C	0.0975336	rs76217799	Primary	-0.86592	0.173118	5.67638e-07	0.0256748
ENSG00000137411.12	VARS2	30876018	31300197	G	A	0.0997758	rs79158921	Primary	-0.847406	0.173252	1.00237e-06	0.0453384
ENSG00000137411.12	VARS2	30876018	31302265	A	G	0.0964126	rs4947307	Primary	-0.908882	0.178855	3.74122e-07	0.0169219
ENSG00000137411.12	VARS2	30876018	31306420	G	A	0.0997758	rs1625792	Primary	-0.847406	0.173252	1.00237e-06	0.0453384
ENSG00000137411.12	VARS2	30876018	31308476	T	A	0.0997758	rs2854019	Primary	-0.847406	0.173252	1.00237e-06	0.0453384
ENSG00000137411.12	VARS2	30876018	31308562	C	T	0.0997758	rs2854018	Primary	-0.847406	0.173252	1.00237e-06	0.0453384
ENSG00000137411.12	VARS2	30876018	31308717	G	A	0.0997758	rs402175	Primary	-0.847406	0.173252	1.00237e-06	0.0453384
ENSG00000137411.12	VARS2	30876018	31308988	C	T	0.0997758	rs1634776	Primary	-0.847406	0.173252	1.00237e-06	0.0453384
ENSG00000137411.12	VARS2	30876018	31309785	G	A	0.0997758	rs3132474	Primary	-0.847406	0.173252	1.00237e-06	0.0453384
ENSG00000137411.12	VARS2	30876018	31311449	T	A	0.0997758	rs9265831	Primary	-0.847406	0.173252	1.00237e-06	0.0453384
ENSG00000137411.12	VARS2	30876018	31311950	T	C	0.0997758	rs2256747	Primary	-0.847406	0.173252	1.00237e-06	0.0453384
ENSG00000137411.12	VARS2	30876018	31312020	G	A	0.0997758	rs2256750	Primary	-0.847406	0.173252	1.00237e-06	0.0453384
ENSG00000137411.12	VARS2	30876018	31312259	G	A	0.0997758	rs2844589	Primary	-0.847406	0.173252	1.00237e-06	0.0453384
ENSG00000137411.12	VARS2	30876018	31312326	T	G	0.0997758	rs3134792	Primary	-0.847406	0.173252	1.00237e-06	0.0453384
ENSG00000137411.12	VARS2	30876018	31312492	A	G	0.0997758	rs2854010	Primary	-0.847406	0.173252	1.00237e-06	0.0453384
ENSG00000137411.12	VARS2	30876018	31312607	G	C	0.0997758	rs9265857	Primary	-0.847406	0.173252	1.00237e-06	0.0453384
ENSG00000137411.12	VARS2	30876018	31312656	C	T	0.0997758	rs2394978	Primary	-0.847406	0.173252	1.00237e-06	0.0453384
ENSG00000137411.12	VARS2	30876018	31312729	G	A	0.0997758	rs2394979	Primary	-0.847406	0.173252	1.00237e-06	0.0453384
ENSG00000137411.12	VARS2	30876018	31312941	C	T	0.0997758	rs2394980	Primary	-0.847406	0.173252	1.00237e-06	0.0453384
ENSG00000137411.12	VARS2	30876018	31313029	G	T	0.0997758	rs2394981	Primary	-0.847406	0.173252	1.00237e-06	0.0453384
ENSG00000137411.12	VARS2	30876018	31313221	A	C	0.0997758	rs9265886	Primary	-0.847406	0.173252	1.00237e-06	0.0453384
ENSG00000137411.12	VARS2	30876018	31313677	C	T	0.0997758	rs9265908	Primary	-0.847406	0.173252	1.00237e-06	0.0453384
ENSG00000137411.12	VARS2	30876018	31313722	C	T	0.0997758	rs9265910	Primary	-0.847406	0.173252	1.00237e-06	0.0453384
ENSG00000137411.12	VARS2	30876018	31314274	A	G	0.0997758	rs7749555	Primary	-0.847406	0.173252	1.00237e-06	0.0453384
ENSG00000137411.12	VARS2	30876018	31314652	A	G	0.0997758	rs2507998	Primary	-0.847406	0.173252	1.00237e-06	0.0453384
ENSG00000137411.12	VARS2	30876018	31314938	C	T	0.0997758	rs9265937	Primary	-0.847406	0.173252	1.00237e-06	0.0453384
ENSG00000137411.12	VARS2	30876018	31315005	C	T	0.0997758	rs9265938	Primary	-0.847406	0.173252	1.00237e-06	0.0453384
ENSG00000137411.12	VARS2	30876018	31315027	A	G	0.0997758	rs9265939	Primary	-0.847406	0.173252	1.00237e-06	0.0453384
ENSG00000137411.12	VARS2	30876018	31315339	C	T	0.0997758	rs9265954	Primary	-0.847406	0.173252	1.00237e-06	0.0453384
ENSG00000137411.12	VARS2	30876018	31315618	A	G	0.0997758	rs9265964	Primary	-0.847406	0.173252	1.00237e-06	0.0453384
ENSG00000137411.12	VARS2	30876018	31315629	T	C	0.0997758	rs9265965	Primary	-0.847406	0.173252	1.00237e-06	0.0453384
ENSG00000137411.12	VARS2	30876018	31315649	G	T	0.0997758	rs9265967	Primary	-0.847406	0.173252	1.00237e-06	0.0453384
ENSG00000137411.12	VARS2	30876018	31315663	A	T	0.0997758	rs9265968	Primary	-0.847406	0.173252	1.00237e-06	0.0453384
ENSG00000137411.12	VARS2	30876018	31315792	T	C	0.0997758	rs9265971	Primary	-0.847406	0.173252	1.00237e-06	0.0453384
ENSG00000137411.12	VARS2	30876018	31315805	G	C	0.0997758	rs9265972	Primary	-0.847406	0.173252	1.00237e-06	0.0453384
ENSG00000137411.12	VARS2	30876018	31315861	G	A	0.0997758	rs9265973	Primary	-0.847406	0.173252	1.00237e-06	0.0453384
ENSG00000137411.12	VARS2	30876018	31315879	T	G	0.0997758	rs9265974	Primary	-0.847406	0.173252	1.00237e-06	0.0453384
ENSG00000137411.12	VARS2	30876018	31315933	A	G	0.0986547	rs9265976	Primary	-0.860417	0.173943	7.55412e-07	0.034168
ENSG00000137411.12	VARS2	30876018	31316044	C	T	0.0997758	rs9265979	Primary	-0.847406	0.173252	1.00237e-06	0.0453384
ENSG00000137411.12	VARS2	30876018	31316080	C	T	0.0997758	rs9265982	Primary	-0.847406	0.173252	1.00237e-06	0.0453384
ENSG00000137411.12	VARS2	30876018	31316234	A	C	0.0997758	rs9265985	Primary	-0.847406	0.173252	1.00237e-06	0.0453384
ENSG00000137411.12	VARS2	30876018	31316448	T	A	0.0986547	rs9265990	Primary	-0.855954	0.172997	7.50588e-07	0.0339498
ENSG00000137411.12	VARS2	30876018	31316520	G	A	0.0986547	rs9265993	Primary	-0.852992	0.173275	8.53248e-07	0.0385933
ENSG00000137411.12	VARS2	30876018	31316526	T	C	0.0952915	rs9265994	Primary	-0.918035	0.178589	2.74015e-07	0.012394
ENSG00000137411.12	VARS2	30876018	31316613	G	A	0.0975336	rs9265998	Primary	-0.84798	0.173894	1.08029e-06	0.0488624
ENSG00000137411.12	VARS2	30876018	31316695	C	A	0.0964126	rs9266001	Primary	-0.921296	0.178426	2.42438e-07	0.0109657
ENSG00000137411.12	VARS2	30876018	31316911	G	T	0.0964126	rs2923008	Primary	-0.908882	0.178855	3.74122e-07	0.0169219
ENSG00000137411.12	VARS2	30876018	31317063	A	G	0.0997758	rs3016017	Primary	-0.847406	0.173252	1.00237e-06	0.0453384
ENSG00000137411.12	VARS2	30876018	31317065	T	C	0.0997758	rs2923007	Primary	-0.847406	0.173252	1.00237e-06	0.0453384
ENSG00000137411.12	VARS2	30876018	31318308	G	T	0.0997758	rs2596510	Primary	-0.847406	0.173252	1.00237e-06	0.0453384
ENSG00000137411.12	VARS2	30876018	31318432	T	C	0.0997758	rs2596508	Primary	-0.847406	0.173252	1.00237e-06	0.0453384
ENSG00000137411.12	VARS2	30876018	31319215	G	C	0.128924	rs2507995	Primary	-0.732323	0.152452	1.55814e-06	0.0704762
ENSG00000137411.12	VARS2	30876018	31321267	A	C	0.0952915	rs2596500	Primary	-0.930329	0.179578	2.21121e-07	0.0100015
ENSG00000137411.12	VARS2	30876018	31326074	A	T	0.0964126	rs2853999	Primary	-0.908882	0.178855	3.74122e-07	0.0169219
ENSG00000137411.12	VARS2	30876018	31326703	T	C	0.0964126	rs2523593	Primary	-0.908882	0.178855	3.74122e-07	0.0169219
ENSG00000137411.12	VARS2	30876018	31328988	C	G	0.0964126	rs2523573	Primary	-0.908882	0.178855	3.74122e-07	0.0169219
ENSG00000137411.12	VARS2	30876018	31329374	A	C	0.0964126	rs2596545	Primary	-0.908882	0.178855	3.74122e-07	0.0169219
ENSG00000137411.12	VARS2	30876018	31329642	C	T	0.0975336	rs2596547	Primary	-0.89896	0.177434	4.05296e-07	0.018332
ENSG00000137411.12	VARS2	30876018	31329691	T	A	0.0975336	rs2523571	Primary	-0.897003	0.177255	4.18105e-07	0.0189113
ENSG00000137411.12	VARS2	30876018	31332920	G	A	0.0997758	rs2523546	Primary	-0.90895	0.174522	1.90642e-07	0.00862292
ENSG00000137411.12	VARS2	30876018	31334422	T	C	0.0997758	rs2844577	Primary	-0.90895	0.174522	1.90642e-07	0.00862292
ENSG00000137411.12	VARS2	30876018	31335431	T	C	0.0997758	rs2596430	Primary	-0.90895	0.174522	1.90642e-07	0.00862292
ENSG00000137411.12	VARS2	30876018	31335901	A	G	0.0997758	rs2922994	Primary	-0.920721	0.175203	1.47903e-07	0.0066898
ENSG00000137411.12	VARS2	30876018	31335976	G	C	0.0964126	rs2156874	Primary	-0.908882	0.178855	3.74122e-07	0.0169219
ENSG00000137411.12	VARS2	30876018	31338844	T	C	0.0964126	rs2853986	Primary	-0.905672	0.179148	4.29396e-07	0.019422
ENSG00000137411.12	VARS2	30876018	31339996	G	A	0.0997758	rs2523524	Primary	-0.905689	0.174812	2.20792e-07	0.00998666
ENSG00000137411.12	VARS2	30876018	31340075	C	T	0.0997758	rs2844559	Primary	-0.905689	0.174812	2.20792e-07	0.00998666
ENSG00000137411.12	VARS2	30876018	31344390	A	G	0.0997758	rs2905719	Primary	-0.90895	0.174522	1.90642e-07	0.00862292
ENSG00000137411.12	VARS2	30876018	31346653	A	G	0.0997758	rs2442735	Primary	-0.90895	0.174522	1.90642e-07	0.00862292
ENSG00000137411.12	VARS2	30876018	31346849	CG	C	0.0997758	rs373067406	Primary	-0.929838	0.176377	1.35044e-07	0.00610819
ENSG00000137411.12	VARS2	30876018	31346850	G	*	0.0997758	.	Primary	-0.905949	0.174847	2.20248e-07	0.00996206
ENSG00000137411.12	VARS2	30876018	31348040	T	C	0.134529	rs2596570	Primary	-0.858283	0.154185	2.5978e-08	0.00117501
ENSG00000137411.12	VARS2	30876018	31348077	G	A	0.132287	rs9266669	Primary	-0.829251	0.156014	1.06525e-07	0.00481825
ENSG00000137411.12	VARS2	30876018	31348365	G	A	0.0964126	rs4143332	Primary	-0.908882	0.178855	3.74122e-07	0.0169219
ENSG00000137411.12	VARS2	30876018	31348519	A	G	0.0997758	rs4143333	Primary	-0.90895	0.174522	1.90642e-07	0.00862292
ENSG00000137411.12	VARS2	30876018	31348830	TA	T	0.100897	rs200032555	Primary	-0.956293	0.16997	1.84164e-08	0.000832992
ENSG00000137411.12	VARS2	30876018	31348832	TA	T	0.100897	rs200965092	Primary	-0.956293	0.16997	1.84164e-08	0.000832992
ENSG00000137411.12	VARS2	30876018	31353171	A	G	0.0964126	rs2844531	Primary	-0.908882	0.178855	3.74122e-07	0.0169219
ENSG00000137411.12	VARS2	30876018	31353329	G	A	0.0964126	rs2596565	Primary	-0.908882	0.178855	3.74122e-07	0.0169219
ENSG00000137411.12	VARS2	30876018	31353435	C	G	0.0964126	rs2844530	Primary	-0.908882	0.178855	3.74122e-07	0.0169219
ENSG00000137411.12	VARS2	30876018	31360663	C	T	0.100897	rs2428481	Primary	-0.884668	0.16487	8.05721e-08	0.00364436
ENSG00000137411.12	VARS2	30876018	31363431	AAAAC	A	0.100897	rs10649173	Primary	-0.880472	0.169897	2.19063e-07	0.00990843
ENSG00000137411.12	VARS2	30876018	31377978	C	T	0.0919283	rs2523495	Primary	-0.910296	0.180583	4.63396e-07	0.0209599
ENSG00000137411.12	VARS2	30876018	31386131	G	A	0.0919283	rs3132472	Primary	-0.910296	0.180583	4.63396e-07	0.0209599
ENSG00000137411.12	VARS2	30876018	31408329	T	A	0.0919283	rs3132473	Primary	-0.910296	0.180583	4.63396e-07	0.0209599
ENSG00000137411.12	VARS2	30876018	31410521	A	G	0.0908072	rs3093958	Primary	-0.896969	0.182896	9.37877e-07	0.0424211
ENSG00000137411.12	VARS2	30876018	31414051	CTTTTT	C	0.0908072	.	Primary	-0.896969	0.182896	9.37877e-07	0.0424211
ENSG00000137411.12	VARS2	30876018	31414241	G	T	0.0930493	rs9267092	Primary	-0.921736	0.179305	2.7384e-07	0.012386
ENSG00000137411.12	VARS2	30876018	31426619	C	T	0.426009	rs2516430	Primary	-0.537152	0.110074	1.06138e-06	0.0480074
ENSG00000137411.12	VARS2	30876018	31430010	G	A	0.0941704	rs3132089	Primary	-0.899951	0.178878	4.87733e-07	0.0220606
ENSG00000137411.12	VARS2	30876018	31430065	C	T	0.0941704	rs3099839	Primary	-0.899951	0.178878	4.87733e-07	0.0220606
ENSG00000137411.12	VARS2	30876018	31430694	G	C	0.0941704	rs3094605	Primary	-0.899951	0.178878	4.87733e-07	0.0220606
ENSG00000137411.12	VARS2	30876018	31430752	G	A	0.0930493	rs3132090	Primary	-0.921736	0.179305	2.7384e-07	0.012386
ENSG00000137411.12	VARS2	30876018	31431813	A	G	0.0941704	rs3130907	Primary	-0.899951	0.178878	4.87733e-07	0.0220606
ENSG00000137411.12	VARS2	30876018	31433693	T	C	0.0941704	rs3128986	Primary	-0.899951	0.178878	4.87733e-07	0.0220606
ENSG00000137411.12	VARS2	30876018	31434331	A	T	0.0941704	rs3131619	Primary	-0.899951	0.178878	4.87733e-07	0.0220606
ENSG00000137411.12	VARS2	30876018	31434366	G	A	0.0941704	rs3094013	Primary	-0.899951	0.178878	4.87733e-07	0.0220606
ENSG00000137411.12	VARS2	30876018	31434520	G	C	0.0975336	rs3094012	Primary	-0.873166	0.172895	4.41165e-07	0.0199543
ENSG00000137411.12	VARS2	30876018	31434621	A	G	0.0908072	rs3131618	Primary	-0.896969	0.182896	9.37877e-07	0.0424211
ENSG00000168394.9	TAP1	32821755	31236115	C	T	0.672646	rs2853951	Primary	0.630993	0.130183	1.25353e-06	0.0566985
ENSG00000168394.9	TAP1	32821755	31236690	T	G	0.724215	rs1130592	Primary	0.630491	0.129554	1.13514e-06	0.0513435
ENSG00000168394.9	TAP1	32821755	31236715	GC	G	0.723094	.	Primary	0.632899	0.129827	1.08849e-06	0.0492335
ENSG00000168394.9	TAP1	32821755	31236722	C	T	0.723094	rs1094	Primary	0.632899	0.129827	1.08849e-06	0.0492335
ENSG00000168394.9	TAP1	32821755	31237014	G	A	0.734305	rs3998381	Primary	0.667113	0.131081	3.59329e-07	0.0162528
ENSG00000168394.9	TAP1	32821755	31237017	C	T	0.730942	rs2394960	Primary	0.638531	0.129993	9.01282e-07	0.0407659
ENSG00000168394.9	TAP1	32821755	31237027	C	T	0.730942	rs2394961	Primary	0.638531	0.129993	9.01282e-07	0.0407659
ENSG00000168394.9	TAP1	32821755	31237048	A	G	0.734305	rs9264594	Primary	0.667113	0.131081	3.59329e-07	0.0162528
ENSG00000168394.9	TAP1	32821755	31237061	C	T	0.721973	rs2894204	Primary	0.659067	0.12955	3.63111e-07	0.0164239
ENSG00000168394.9	TAP1	32821755	31237124	T	C	0.734305	rs1130838	Primary	0.667113	0.131081	3.59329e-07	0.0162528
ENSG00000168394.9	TAP1	32821755	31237162	C	G	0.734305	rs35708511	Primary	0.667113	0.131081	3.59329e-07	0.0162528
ENSG00000168394.9	TAP1	32821755	31237230	A	G	0.727578	rs9264596	Primary	0.698562	0.131162	1.00437e-07	0.00454285
ENSG00000168394.9	TAP1	32821755	31237233	A	G	0.724215	rs9264597	Primary	0.669091	0.130089	2.69908e-07	0.0122082
ENSG00000168394.9	TAP1	32821755	31237255	G	A	0.695067	rs2523609	Primary	0.703186	0.128912	4.90401e-08	0.00221813
ENSG00000168394.9	TAP1	32821755	31237323	A	G	0.732063	rs68094471	Primary	0.666556	0.131247	3.80181e-07	0.017196
ENSG00000168394.9	TAP1	32821755	31237333	T	A	0.732063	rs66772001	Primary	0.666556	0.131247	3.80181e-07	0.017196
ENSG00000168394.9	TAP1	32821755	31237353	T	C	0.732063	rs67827555	Primary	0.666556	0.131247	3.80181e-07	0.017196
ENSG00000168394.9	TAP1	32821755	31237405	C	T	0.734305	rs56010430	Primary	0.667113	0.131081	3.59329e-07	0.0162528
ENSG00000168394.9	TAP1	32821755	31237437	T	C	0.734305	rs66459704	Primary	0.667113	0.131081	3.59329e-07	0.0162528
ENSG00000168394.9	TAP1	32821755	31237449	T	C	0.748879	rs68037221	Primary	0.64403	0.135384	1.96429e-06	0.088847
ENSG00000168394.9	TAP1	32821755	31237463	C	G	0.734305	rs66620546	Primary	0.667113	0.131081	3.59329e-07	0.0162528
ENSG00000168394.9	TAP1	32821755	31237526	C	CA	0.730942	rs9281299	Primary	0.638531	0.129993	9.01282e-07	0.0407659
ENSG00000168394.9	TAP1	32821755	31237563	C	T	0.734305	rs3819287	Primary	0.667113	0.131081	3.59329e-07	0.0162528
ENSG00000168394.9	TAP1	32821755	31237575	TCA	T	0.732063	rs372183108	Primary	0.675159	0.131037	2.57108e-07	0.0116293
ENSG00000168394.9	TAP1	32821755	31237592	A	C	0.734305	rs9264606	Primary	0.667113	0.131081	3.59329e-07	0.0162528
ENSG00000168394.9	TAP1	32821755	31237660	A	G	0.732063	rs9264608	Primary	0.675159	0.131037	2.57108e-07	0.0116293
ENSG00000168394.9	TAP1	32821755	31237876	A	G	0.734305	rs9264622	Primary	0.667113	0.131081	3.59329e-07	0.0162528
ENSG00000168394.9	TAP1	32821755	31237931	CAGA	C	0.726457	rs67298404	Primary	0.623315	0.130201	1.69029e-06	0.0764536
ENSG00000168394.9	TAP1	32821755	31238297	C	T	0.734305	rs9264636	Primary	0.667113	0.131081	3.59329e-07	0.0162528
ENSG00000168394.9	TAP1	32821755	31238318	G	A	0.7287	rs9264638	Primary	0.646416	0.129958	6.55755e-07	0.0296605
ENSG00000168394.9	TAP1	32821755	31238372	C	G	0.734305	rs9264640	Primary	0.667113	0.131081	3.59329e-07	0.0162528
ENSG00000168394.9	TAP1	32821755	31238492	C	A	0.734305	rs9264643	Primary	0.667113	0.131081	3.59329e-07	0.0162528
ENSG00000168394.9	TAP1	32821755	31238524	G	A	0.724215	rs9264645	Primary	0.630762	0.130677	1.38688e-06	0.0627298
ENSG00000168394.9	TAP1	32821755	31238535	T	C	0.724215	rs9264646	Primary	0.630762	0.130677	1.38688e-06	0.0627298
ENSG00000168394.9	TAP1	32821755	31238613	A	G	0.734305	rs9264647	Primary	0.667113	0.131081	3.59329e-07	0.0162528
ENSG00000168394.9	TAP1	32821755	31238762	T	C	0.734305	rs9264652	Primary	0.667113	0.131081	3.59329e-07	0.0162528
ENSG00000168394.9	TAP1	32821755	31239227	C	T	0.729821	rs9264664	Primary	0.64482	0.130346	7.53638e-07	0.0340878
ENSG00000168394.9	TAP1	32821755	31239270	GATCCA	G	0.733184	.	Primary	0.65854	0.13096	4.94205e-07	0.0223534
ENSG00000168394.9	TAP1	32821755	31239802	C	G	0.734305	rs1050451	Primary	0.667113	0.131081	3.59329e-07	0.0162528
ENSG00000168394.9	TAP1	32821755	31239827	C	T	0.730942	rs2308525	Primary	0.638531	0.129993	9.01282e-07	0.0407659
ENSG00000168394.9	TAP1	32821755	31239855	C	G	0.734305	rs7767581	Primary	0.667113	0.131081	3.59329e-07	0.0162528
ENSG00000168394.9	TAP1	32821755	31239868	G	C	0.734305	rs9264674	Primary	0.667113	0.131081	3.59329e-07	0.0162528
ENSG00000168394.9	TAP1	32821755	31240180	A	C	0.733184	rs2524093	Primary	0.641467	0.13154	1.07939e-06	0.0488217
ENSG00000168394.9	TAP1	32821755	31240307	TACCTC	T	0.730942	rs374915880	Primary	0.659251	0.131041	4.88274e-07	0.0220851
ENSG00000168394.9	TAP1	32821755	31240712	A	C	0.588565	rs2249741	Primary	0.601355	0.119781	5.1545e-07	0.0233143
ENSG00000168394.9	TAP1	32821755	31242089	A	T	0.76009	rs2524080	Primary	0.706336	0.140834	5.29335e-07	0.0239423
ENSG00000168394.9	TAP1	32821755	31242223	C	G	0.688341	rs2844619	Primary	0.615496	0.129644	2.05876e-06	0.0931198
ENSG00000168394.9	TAP1	32821755	31252396	A	C	0.789238	rs2524054	Primary	0.703585	0.146021	1.44723e-06	0.0654596
ENSG00000168394.9	TAP1	32821755	31257511	A	C	0.789238	rs2853928	Primary	0.703585	0.146021	1.44723e-06	0.0654596
ENSG00000168394.9	TAP1	32821755	31263510	T	C	0.789238	rs2524143	Primary	0.703585	0.146021	1.44723e-06	0.0654596
ENSG00000168394.9	TAP1	32821755	31263522	C	G	0.789238	rs2524142	Primary	0.703585	0.146021	1.44723e-06	0.0654596
ENSG00000168394.9	TAP1	32821755	31264133	G	C	0.788117	rs2524139	Primary	0.69244	0.144047	1.53185e-06	0.0692873
ENSG00000168394.9	TAP1	32821755	31265135	C	G	0.789238	rs2524129	Primary	0.703585	0.146021	1.44723e-06	0.0654596
ENSG00000168394.9	TAP1	32821755	31265490	T	C	0.789238	rs2247056	Primary	0.703585	0.146021	1.44723e-06	0.0654596
ENSG00000168394.9	TAP1	32821755	31267422	A	C	0.789238	rs2524060	Primary	0.703585	0.146021	1.44723e-06	0.0654596
ENSG00000168394.9	TAP1	32821755	31270103	CTG	C	0.789238	rs35261767	Primary	0.703585	0.146021	1.44723e-06	0.0654596
ENSG00000168394.9	TAP1	32821755	31271567	A	G	0.789238	rs7750963	Primary	0.703585	0.146021	1.44723e-06	0.0654596
ENSG00000168394.9	TAP1	32821755	31272261	C	T	0.789238	rs6457374	Primary	0.703585	0.146021	1.44723e-06	0.0654596
ENSG00000168394.9	TAP1	32821755	31276760	T	C	0.625561	rs1005598	Conditional 1	0.60385	0.125642	1.53886e-06	0.0696044
ENSG00000168394.9	TAP1	32821755	31276777	A	G	0.625561	rs1634791	Conditional 1	0.60385	0.125642	1.53886e-06	0.0696044
ENSG00000168394.9	TAP1	32821755	31277087	G	A	0.631166	rs1634789	Conditional 1	0.64088	0.12423	2.48506e-07	0.0112402
ENSG00000168394.9	TAP1	32821755	31320870	C	CTGA	0.547085	.	Primary	0.611198	0.124516	9.17234e-07	0.0414874
ENSG00000168394.9	TAP1	32821755	31373260	G	C	0.532511	rs2442714	Primary	0.621293	0.123089	4.47577e-07	0.0202444
ENSG00000168394.9	TAP1	32821755	31380340	C	T	0.46861	rs2844514	Conditional 2	0.593497	0.119396	6.6673e-07	0.0187231
ENSG00000168394.9	TAP1	32821755	31380583	A	G	0.46861	rs2256184	Conditional 2	0.593497	0.119396	6.6673e-07	0.0187231
ENSG00000168394.9	TAP1	32821755	31381351	A	G	0.46861	rs2853968	Conditional 2	0.593497	0.119396	6.6673e-07	0.0187231
ENSG00000168394.9	TAP1	32821755	31385629	T	G	0.46861	rs2848711	Conditional 2	0.593497	0.119396	6.6673e-07	0.0187231
ENSG00000168394.9	TAP1	32821755	31388214	G	A	0.46861	rs2844513	Conditional 2	0.593497	0.119396	6.6673e-07	0.0187231
ENSG00000168394.9	TAP1	32821755	31390139	T	TA	0.46861	.	Conditional 2	0.593497	0.119396	6.6673e-07	0.0187231
ENSG00000168394.9	TAP1	32821755	31542963	G	A	0.0168161	rs1800750	Conditional 2	2.07275	0.414096	5.57241e-07	0.0156484
ENSG00000168394.9	TAP1	32821755	31559917	CCT	C	0.0168161	.	Conditional 2	2.07275	0.414096	5.57241e-07	0.0156484
ENSG00000168394.9	TAP1	32821755	31561135	G	A	0.0168161	.	Conditional 2	2.07275	0.414096	5.57241e-07	0.0156484
ENSG00000168394.9	TAP1	32821755	31564299	G	A	0.0168161	rs9267508	Conditional 2	2.07275	0.414096	5.57241e-07	0.0156484
ENSG00000168394.9	TAP1	32821755	31566363	T	C	0.0168161	rs9267510	Conditional 2	2.07275	0.414096	5.57241e-07	0.0156484
ENSG00000168394.9	TAP1	32821755	31568419	T	C	0.0168161	rs9267512	Conditional 2	2.07275	0.414096	5.57241e-07	0.0156484
ENSG00000168394.9	TAP1	32821755	32341353	G	A	0.501121	rs9268402	Primary	0.599061	0.125263	1.73201e-06	0.0783405
ENSG00000168394.9	TAP1	32821755	32342691	C	A	0.502242	rs7746327	Primary	0.625557	0.124396	4.93686e-07	0.0223299
ENSG00000168394.9	TAP1	32821755	32381736	T	A	0.543722	rs7759742	Primary	0.599746	0.125764	1.85305e-06	0.0838153
ENSG00000168394.9	TAP1	32821755	32427789	T	C	0.662556	rs9268832	Primary	0.605517	0.126814	1.79849e-06	0.0813475
ENSG00000168394.9	TAP1	32821755	32567897	G	A	0.382287	rs28752490	Primary	0.593618	0.121238	9.76558e-07	0.0441707
ENSG00000168394.9	TAP1	32821755	32568481	T	A	0.380045	rs28752497	Primary	0.583074	0.121759	1.67821e-06	0.0759072
ENSG00000168394.9	TAP1	32821755	32568995	G	A	0.382287	rs28752501	Primary	0.593618	0.121238	9.76558e-07	0.0441707
ENSG00000168394.9	TAP1	32821755	32569691	G	A	0.310538	rs477515	Primary	0.607728	0.122987	7.75662e-07	0.035084
ENSG00000168394.9	TAP1	32821755	32569852	G	A	0.310538	rs622137	Primary	0.607728	0.122987	7.75662e-07	0.035084
ENSG00000168394.9	TAP1	32821755	32570147	A	G	0.310538	rs2516052	Primary	0.607728	0.122987	7.75662e-07	0.035084
ENSG00000168394.9	TAP1	32821755	32570184	C	T	0.310538	rs2516051	Primary	0.607728	0.122987	7.75662e-07	0.035084
ENSG00000168394.9	TAP1	32821755	32570400	T	C	0.31278	rs2516049	Primary	0.592389	0.123336	1.56263e-06	0.0706794
ENSG00000168394.9	TAP1	32821755	32570401	G	A	0.31278	rs2454138	Primary	0.592389	0.123336	1.56263e-06	0.0706794
ENSG00000168394.9	TAP1	32821755	32571116	T	A	0.310538	rs28383179	Primary	0.607728	0.122987	7.75662e-07	0.035084
ENSG00000168394.9	TAP1	32821755	32571118	A	C	0.310538	rs28383180	Primary	0.607728	0.122987	7.75662e-07	0.035084
ENSG00000168394.9	TAP1	32821755	32571811	G	A	0.310538	rs28383182	Primary	0.607728	0.122987	7.75662e-07	0.035084
ENSG00000168394.9	TAP1	32821755	32571897	A	G	0.310538	rs12211942	Primary	0.607728	0.122987	7.75662e-07	0.035084
ENSG00000168394.9	TAP1	32821755	32572030	T	A	0.307175	rs526784	Primary	0.601253	0.122792	9.7557e-07	0.044126
ENSG00000168394.9	TAP1	32821755	32572048	G	T	0.310538	rs28383186	Primary	0.607728	0.122987	7.75662e-07	0.035084
ENSG00000168394.9	TAP1	32821755	32572311	T	C	0.304933	rs586610	Primary	0.603043	0.12361	1.06834e-06	0.0483222
ENSG00000168394.9	TAP1	32821755	32572904	T	A	0.382287	rs574170	Primary	0.593618	0.121238	9.76558e-07	0.0441707
ENSG00000168394.9	TAP1	32821755	32573877	T	C	0.382287	rs614348	Primary	0.593618	0.121238	9.76558e-07	0.0441707
ENSG00000168394.9	TAP1	32821755	32575918	A	T	0.378924	rs643889	Primary	0.603152	0.121274	6.57649e-07	0.0297461
ENSG00000168394.9	TAP1	32821755	32576009	T	G	0.378924	rs482205	Primary	0.603152	0.121274	6.57649e-07	0.0297461
ENSG00000168394.9	TAP1	32821755	32576019	T	C	0.378924	rs482162	Primary	0.603152	0.121274	6.57649e-07	0.0297461
ENSG00000168394.9	TAP1	32821755	32576064	G	C	0.419283	rs482044	Primary	0.610769	0.121395	4.87247e-07	0.0220387
ENSG00000168394.9	TAP1	32821755	32576145	C	A	0.378924	rs481139	Primary	0.603152	0.121274	6.57649e-07	0.0297461
ENSG00000168394.9	TAP1	32821755	32581922	C	T	0.293722	rs522308	Primary	0.632517	0.126445	5.66469e-07	0.0256219
ENSG00000168394.9	TAP1	32821755	32584419	CTT	C	0.307175	rs28359885	Primary	0.620601	0.123304	4.82665e-07	0.0218314
ENSG00000168394.9	TAP1	32821755	32588056	C	T	0.323991	rs9271432	Primary	0.585935	0.12314	1.95265e-06	0.0883205
ENSG00000168394.9	TAP1	32821755	32588057	A	G	0.323991	rs9271433	Primary	0.585935	0.12314	1.95265e-06	0.0883205
ENSG00000168394.9	TAP1	32821755	32588058	G	A	0.39574	rs9271434	Primary	0.580942	0.122225	2.00374e-06	0.0906312
ENSG00000168394.9	TAP1	32821755	32588312	TAGA	T	0.326233	rs141060192	Primary	0.575328	0.120169	1.68729e-06	0.0763178
ENSG00000168394.9	TAP1	32821755	32590317	A	G	0.300448	rs9271554	Primary	0.611869	0.123912	7.8951e-07	0.0357103
ENSG00000168394.9	TAP1	32821755	32809848	G	A	0.140135	rs9357155	Primary	0.888631	0.186917	1.99282e-06	0.0901374
ENSG00000168394.9	TAP1	32821755	32821859	C	A	0.41704	rs2071480	Primary	-0.88963	0.117248	3.25295e-14	1.47134e-09
ENSG00000168394.9	TAP1	32821755	32822269	A	C	0.41704	rs1351383	Primary	-0.88963	0.117248	3.25295e-14	1.47134e-09
ENSG00000168394.9	TAP1	32821755	32822296	C	G	0.414798	rs1351382	Primary	-0.880749	0.117137	5.51781e-14	2.49576e-09
ENSG00000168394.9	TAP1	32821755	32822858	G	T	0.41704	rs4713600	Primary	-0.88963	0.117248	3.25295e-14	1.47134e-09
ENSG00000168394.9	TAP1	32821755	32822907	C	T	0.430493	rs3763348	Primary	-0.887439	0.120913	2.14384e-13	9.69681e-09
ENSG00000168394.9	TAP1	32821755	32822975	T	A	0.41704	rs3763347	Primary	-0.88963	0.117248	3.25295e-14	1.47134e-09
ENSG00000168394.9	TAP1	32821755	32823257	T	C	0.430493	rs3763346	Primary	-0.887439	0.120913	2.14384e-13	9.69681e-09
ENSG00000168394.9	TAP1	32821755	32824318	C	T	0.430493	rs2071534	Primary	-0.887439	0.120913	2.14384e-13	9.69681e-09
ENSG00000168394.9	TAP1	32821755	32825348	T	C	0.41704	rs2071477	Primary	-0.88963	0.117248	3.25295e-14	1.47134e-09
ENSG00000168394.9	TAP1	32821755	32825379	A	G	0.430493	rs2071476	Primary	-0.887439	0.120913	2.14384e-13	9.69681e-09
ENSG00000168394.9	TAP1	32821755	32826450	T	C	0.430493	rs6930981	Primary	-0.887439	0.120913	2.14384e-13	9.69681e-09
ENSG00000168394.9	TAP1	32821755	32826668	TA	T	0.433857	rs55687429	Primary	-0.904151	0.121503	9.9587e-14	4.50442e-09
ENSG00000168394.9	TAP1	32821755	32826985	C	T	0.41704	rs9276816	Primary	-0.88963	0.117248	3.25295e-14	1.47134e-09
ENSG00000168394.9	TAP1	32821755	32827561	TGAA	T	0.41704	.	Primary	-0.88963	0.117248	3.25295e-14	1.47134e-09
ENSG00000168394.9	TAP1	32821755	32828156	C	T	0.34417	rs9276817	Primary	-0.676095	0.12275	3.63164e-08	0.00164263
ENSG00000168394.9	TAP1	32821755	32828219	C	CA	0.266816	rs41268321	Primary	-0.961206	0.135264	1.19338e-12	5.39777e-08
ENSG00000168394.9	TAP1	32821755	32828248	T	G	0.41704	rs9276818	Primary	-0.88963	0.117248	3.25295e-14	1.47134e-09
ENSG00000168394.9	TAP1	32821755	32829102	G	A	0.41704	rs9276819	Primary	-0.88963	0.117248	3.25295e-14	1.47134e-09
ENSG00000168394.9	TAP1	32821755	32829276	G	A	0.430493	rs9276820	Primary	-0.887439	0.120913	2.14384e-13	9.69681e-09
ENSG00000168394.9	TAP1	32821755	32829429	A	G	0.430493	rs9276823	Primary	-0.887439	0.120913	2.14384e-13	9.69681e-09
ENSG00000168394.9	TAP1	32821755	32829538	A	G	0.42713	rs9276824	Primary	-0.884122	0.119682	1.4988e-13	6.77923e-09
ENSG00000168394.9	TAP1	32821755	32829714	G	A	0.430493	rs9276825	Primary	-0.887439	0.120913	2.14384e-13	9.69681e-09
ENSG00000168394.9	TAP1	32821755	32830013	G	A	0.41704	rs7767288	Primary	-0.88963	0.117248	3.25295e-14	1.47134e-09
ENSG00000168394.9	TAP1	32821755	32830034	A	G	0.430493	rs7766900	Primary	-0.887439	0.120913	2.14384e-13	9.69681e-09
ENSG00000168394.9	TAP1	32821755	32830262	T	C	0.430493	rs7749454	Primary	-0.887439	0.120913	2.14384e-13	9.69681e-09
ENSG00000168394.9	TAP1	32821755	32830904	G	A	0.41704	rs9276827	Primary	-0.88963	0.117248	3.25295e-14	1.47134e-09
ENSG00000168394.9	TAP1	32821755	32831247	A	T	0.41704	rs6938130	Primary	-0.88963	0.117248	3.25295e-14	1.47134e-09
ENSG00000168394.9	TAP1	32821755	32831461	C	T	0.41704	rs6938690	Primary	-0.88963	0.117248	3.25295e-14	1.47134e-09
ENSG00000168394.9	TAP1	32821755	32831542	GA	G	0.430493	.	Primary	-0.887439	0.120913	2.14384e-13	9.69681e-09
ENSG00000168394.9	TAP1	32821755	32831701	CTGAGATCCTG	C	0.428251	.	Primary	-0.882677	0.121911	4.47531e-13	2.02423e-08
ENSG00000168394.9	TAP1	32821755	32831756	A	G	0.430493	rs9276830	Primary	-0.887439	0.120913	2.14384e-13	9.69681e-09
ENSG00000168394.9	TAP1	32821755	32832400	C	T	0.328475	rs9276832	Primary	-0.656327	0.126131	1.95532e-07	0.00884412
ENSG00000168394.9	TAP1	32821755	32832817	A	G	0.41704	rs1133896	Primary	-0.88963	0.117248	3.25295e-14	1.47134e-09
ENSG00000168394.9	TAP1	32821755	32833256	G	A	0.41704	rs1383270	Primary	-0.88963	0.117248	3.25295e-14	1.47134e-09
ENSG00000168394.9	TAP1	32821755	32833296	A	G	0.430493	rs1383269	Primary	-0.887439	0.120913	2.14384e-13	9.69681e-09
ENSG00000168394.9	TAP1	32821755	32833646	G	A	0.41704	rs1383267	Primary	-0.88963	0.117248	3.25295e-14	1.47134e-09
ENSG00000168394.9	TAP1	32821755	32833807	GA	G	0.430493	rs375934396	Primary	-0.887439	0.120913	2.14384e-13	9.69681e-09
ENSG00000168394.9	TAP1	32821755	32834229	A	G	0.41704	rs1871667	Primary	-0.88963	0.117248	3.25295e-14	1.47134e-09
ENSG00000168394.9	TAP1	32821755	32834664	T	A	0.357623	rs6904838	Primary	-0.690339	0.122347	1.67634e-08	0.000758225
ENSG00000168394.9	TAP1	32821755	32835615	C	A	0.357623	rs6931062	Primary	-0.690339	0.122347	1.67634e-08	0.000758225
ENSG00000168394.9	TAP1	32821755	32836110	C	CA	0.339686	rs34436915	Primary	-0.758746	0.123602	8.32271e-10	3.76445e-05
ENSG00000168394.9	TAP1	32821755	32836441	GGTTTTTTGTTGTTGTTTGTTTTTAAAATAATTTAAAAACTT	G	0.139013	rs370080768	Primary	0.915509	0.191854	1.82488e-06	0.0825412
ENSG00000168394.9	TAP1	32821755	32836710	T	C	0.357623	rs9276833	Primary	-0.690339	0.122347	1.67634e-08	0.000758225
ENSG00000168394.9	TAP1	32821755	32836759	C	T	0.357623	rs9276834	Primary	-0.690339	0.122347	1.67634e-08	0.000758225
ENSG00000168394.9	TAP1	32821755	32837129	T	A	0.357623	rs9276835	Primary	-0.690339	0.122347	1.67634e-08	0.000758225
ENSG00000168394.9	TAP1	32821755	32837696	A	C	0.357623	rs1580345	Primary	-0.690339	0.122347	1.67634e-08	0.000758225
ENSG00000168394.9	TAP1	32821755	32838083	AG	A	0.357623	rs141369590	Primary	-0.690339	0.122347	1.67634e-08	0.000758225
ENSG00000168394.9	TAP1	32821755	32838228	A	G	0.357623	rs6905477	Primary	-0.690339	0.122347	1.67634e-08	0.000758225
ENSG00000168394.9	TAP1	32821755	32838269	T	C	0.357623	rs6928398	Primary	-0.690339	0.122347	1.67634e-08	0.000758225
ENSG00000168394.9	TAP1	32821755	32838584	C	A	0.357623	rs6906376	Primary	-0.690339	0.122347	1.67634e-08	0.000758225
ENSG00000168394.9	TAP1	32821755	32838664	T	C	0.358744	rs6929078	Primary	-0.689969	0.122544	1.79821e-08	0.000813349
ENSG00000168394.9	TAP1	32821755	32838949	T	C	0.357623	rs7453903	Primary	-0.690339	0.122347	1.67634e-08	0.000758225
ENSG00000168394.9	TAP1	32821755	32838995	A	G	0.357623	rs9276841	Primary	-0.690339	0.122347	1.67634e-08	0.000758225
ENSG00000168394.9	TAP1	32821755	32839749	A	G	0.357623	rs9276843	Primary	-0.690339	0.122347	1.67634e-08	0.000758225
ENSG00000168394.9	TAP1	32821755	32840092	A	G	0.359865	rs9276844	Primary	-0.685591	0.12233	2.0892e-08	0.000944968
ENSG00000168394.9	TAP1	32821755	32840139	A	G	0.357623	rs9276845	Primary	-0.690339	0.122347	1.67634e-08	0.000758225
ENSG00000168394.9	TAP1	32821755	32840369	A	G	0.357623	rs9276846	Primary	-0.690339	0.122347	1.67634e-08	0.000758225
[truncated: 74,812 more rows]

## Sheet: Table S6B lead eQTLs
Gene ID	Gene name	SNP information					eQTL information
		Position	Reference	Alternative	Allele frequency	rsID	Type	Beta	Standard error of beta	p-value	Bonferroni-corrected p-value	FDR-adjusted p-value (genome-wide)
ENSG00000066379.10	ZNRD1	29905629	G	A	0.343049	rs1632892	Conditional 1	-0.578285	0.116228	6.5099e-07	0.0294449	1.35585e-09
ENSG00000066379.10	ZNRD1	29902774	A	G	0.353139	rs28749095	Conditional 2	0.538533	0.109267	8.28277e-07	0.0374638	1.16572e-09
ENSG00000066379.10	ZNRD1	29903096	C	*	0.0538117	.	Primary	-1.70223	0.213807	1.66533e-15	7.53247e-11	4.19274e-08
ENSG00000137310.7	TCF19	31437492	C	G	0.89574	rs2523670	Conditional 1	-0.764158	0.158947	1.5274e-06	0.0690858	1.44737e-06
ENSG00000137310.7	TCF19	31135735	A	C	0.772422	rs9263805	Primary	-0.808866	0.117701	6.32228e-12	2.85963e-07	0.000122696
ENSG00000137411.12	VARS2	30813097	G	A	0.195067	rs2535333	Primary	-0.951904	0.125718	3.68594e-14	1.66719e-09	8.37457e-07
ENSG00000168394.9	TAP1	31277087	G	A	0.631166	rs1634789	Conditional 1	0.64088	0.12423	2.48506e-07	0.0112402	2.11805e-09
ENSG00000168394.9	TAP1	31561135	G	A	0.0168161	.	Conditional 2	2.07275	0.414096	5.57241e-07	0.0156484	0.000191705
ENSG00000168394.9	TAP1	32821859	C	A	0.41704	rs2071480	Primary	-0.88963	0.117248	3.25295e-14	1.47134e-09	7.57558e-07
ENSG00000176998.3	HCG4	29872089	T	C	0.0392377	rs75298535	Conditional 1	-1.40715	0.296697	2.10873e-06	0.0953798	9.35066e-12
ENSG00000176998.3	HCG4	29908441	G	C	0.0325112	rs112374560	Conditional 2	-1.85882	0.328483	1.52439e-08	0.000406266	1.34792e-11
ENSG00000176998.3	HCG4	29761835	A	G	0.327354	rs1611220	Primary	-2.23759	0.0919226	1.11022e-16	5.02165e-12	3.33616e-09
ENSG00000179344.12	HLA-DQB1	31335901	A	G	0.0997758	rs2922994	Conditional 1	-1.13967	0.221337	2.61808e-07	0.0118418	9.35066e-12
ENSG00000179344.12	HLA-DQB1	30940989	T	C	0.143498	rs3132579	Conditional 2	-1.00204	0.186202	7.38708e-08	0.0019264	2.00814e-10
ENSG00000179344.12	HLA-DQB1	32629372	G	A	0.191704	.	Primary	-1.62588	0.152081	1.11022e-16	5.02165e-12	3.33616e-09
ENSG00000196126.6	HLA-DRB1	32743835	C	T	0.100897	rs9276627	Conditional 1	-1.03072	0.212113	1.17792e-06	0.0532787	9.35066e-12
ENSG00000196126.6	HLA-DRB1	30154199	T	C	0.396861	rs2074473	Conditional 2	-0.716709	0.135135	1.13511e-07	0.0029355	2.23419e-05
ENSG00000196126.6	HLA-DRB1	32520983	A	T	0.880045	rs61593055	Primary	-2.03055	0.179915	1.11022e-16	5.02165e-12	3.33616e-09
ENSG00000196735.7	HLA-DQA1	32295965	T	C	0.897982	rs7451330	Conditional 1	-1.33419	0.257231	2.14012e-07	0.00967998	9.35066e-12
ENSG00000196735.7	HLA-DQA1	32596496	A	G	0.0695067	rs116489113	Primary	2.36605	0.260474	1.11022e-16	5.02165e-12	3.33616e-09
ENSG00000198502.5	HLA-DRB5	32676445	T	G	0.25	rs9275546	Conditional 1	0.738489	0.15357	1.51824e-06	0.0686714	9.35066e-12
ENSG00000198502.5	HLA-DRB5	32679489	A	C	0.360987	rs17615293	Conditional 2	-0.658366	0.137162	1.58738e-06	0.0717988	1.34792e-11
ENSG00000198502.5	HLA-DRB5	32538604	TC	T	0.780269	rs71658228	Primary	-2.72106	0.113611	1.11022e-16	5.02165e-12	3.33616e-09
ENSG00000198563.9	DDX39B	29456021	G	A	0.0336323	rs9348832	Conditional 1	-0.427585	0.0886541	1.41361e-06	0.063939	1.59803e-05
ENSG00000198563.9	DDX39B	31514058	C	A	0.0100897	rs114066913	Primary	-0.965177	0.152931	2.76911e-10	1.25249e-05	0.0049606
ENSG00000204257.10	HLA-DMA	32688872	G	A	0.163677	rs9275741	Conditional 1	0.894849	0.17769	4.75363e-07	0.0215012	6.03203e-07
ENSG00000204257.10	HLA-DMA	32964696	A	T	0.378924	rs206765	Primary	-0.959551	0.120752	1.88738e-15	8.5368e-11	4.62672e-08
ENSG00000204287.9	HLA-DRA	32679384	G	T	0.238789	rs9275578	Conditional 1	-0.770077	0.160579	1.62171e-06	0.0733518	9.35066e-12
ENSG00000204287.9	HLA-DRA	32323529	A	G	0.615471	rs1265758	Conditional 2	-0.702626	0.1363	2.53631e-07	0.00814282	3.00641e-10
ENSG00000204287.9	HLA-DRA	32611098	G	T	0.143498	rs707946	Primary	-1.59953	0.186868	1.11022e-16	5.02165e-12	3.33616e-09
ENSG00000204308.6	RNF5	32453612	C	G	0.272422	.	Conditional 1	0.757391	0.123807	9.50532e-10	4.29935e-05	9.35066e-12
ENSG00000204308.6	RNF5	31304648	G	A	0.162556	rs1634767	Conditional 2	-0.835103	0.160546	1.97536e-07	0.00557546	1.34792e-11
ENSG00000204308.6	RNF5	32263663	C	T	0.0840807	rs9268152	Primary	-1.97817	0.201348	1.11022e-16	5.02165e-12	3.33616e-09
ENSG00000204310.6	AGPAT1	32173257	G	A	0.482063	rs3131295	Conditional 1	-0.522375	0.105997	8.29965e-07	0.0375401	3.19022e-11
ENSG00000204310.6	AGPAT1	32174957	T	C	0.613229	rs3130290	Conditional 2	-0.512691	0.107616	1.89709e-06	0.0858071	4.65644e-11
ENSG00000204310.6	AGPAT1	32136547	T	G	0.63565	rs1061808	Primary	-0.874436	0.108795	8.88178e-16	4.01732e-11	2.43343e-08
ENSG00000204348.5	DXO	31935392	T	C	0.0134529	rs45451301	Primary	-3.8741	0.428976	2.22045e-16	1.00433e-11	6.4638e-09
ENSG00000204371.7	EHMT2	32177429	C	T	0.273543	rs9267830	Conditional 1	-0.520177	0.109703	2.1194e-06	0.0958627	3.0229e-07
ENSG00000204371.7	EHMT2	32188099	C	T	0.246637	rs430916	Conditional 2	-0.565015	0.113962	7.12535e-07	0.0322287	4.50343e-08
ENSG00000204371.7	EHMT2	32006214	CCTG	C	0.306054	rs138498156	Primary	-0.692743	0.100766	6.20903e-12	2.80841e-07	0.000122696
ENSG00000204385.6	SLC44A4	31836151	G	A	0.110987	rs11965547	Conditional 1	-0.820806	0.166358	8.05744e-07	0.0364446	3.42901e-06
ENSG00000204385.6	SLC44A4	32057627	C	T	0.109865	rs204899	Conditional 2	-0.77565	0.161731	1.61928e-06	0.0562117	1.4117e-06
ENSG00000204385.6	SLC44A4	31847180	G	A	0.0347534	rs146903072	Primary	-1.88107	0.302381	4.94497e-10	2.23666e-05	0.00853037
ENSG00000204438.6	GPANK1	31587083	T	C	0.153587	rs3130621	Primary	-1.08497	0.148548	2.79776e-13	1.26546e-08	5.9232e-06
ENSG00000204444.6	APOM	32387432	G	A	0.0941704	rs2395160	Primary	-1.00036	0.171851	5.84604e-09	0.000264422	0.097246
ENSG00000204463.8	BAG6	29851755	C	T	0.0661435	rs1611585	Conditional 1	0.971353	0.199861	1.17296e-06	0.0530542	9.45015e-06
ENSG00000204463.8	BAG6	29860353	A	T	0.121076	rs2844817	Conditional 2	0.779816	0.159879	1.07425e-06	0.0326766	8.35551e-06
ENSG00000204463.8	BAG6	29832991	GT	G	0.573991	rs34832458	Primary	0.677658	0.10636	1.87369e-10	8.47487e-06	0.00342235
ENSG00000204516.5	MICB	31561211	T	C	0.772422	rs2736190	Conditional 1	0.60396	0.126898	1.94145e-06	0.0878138	9.35066e-12
ENSG00000204516.5	MICB	31229366	G	C	0.825112	rs9264397	Conditional 2	0.610484	0.12282	6.67528e-07	0.0195486	1.34792e-11
ENSG00000204516.5	MICB	31479645	T	C	0.795964	rs3132463	Primary	1.14112	0.109834	1.11022e-16	5.02165e-12	3.33616e-09
ENSG00000204520.8	MICA	31323567	G	A	0.147982	rs4081560	Conditional 1	-0.995394	0.168386	3.39226e-09	0.000153435	9.35066e-12
ENSG00000204520.8	MICA	32660153	T	G	0.547085	rs4713583	Conditional 2	-0.647067	0.135938	1.93586e-06	0.0875607	1.34792e-11
ENSG00000204520.8	MICA	31383083	G	A	0.320628	rs9266831	Primary	-1.1944	0.113164	1.11022e-16	5.02165e-12	3.33616e-09
ENSG00000204525.10	HLA-C	31042894	CTTTG	C	0.337444	rs145304444	Conditional 1	-0.580525	0.1213	1.70255e-06	0.0770082	9.35066e-12
ENSG00000204525.10	HLA-C	31312437	T	C	0.550448	rs4260781	Conditional 2	-0.657743	0.115993	1.4234e-08	0.000369329	1.34792e-11
ENSG00000204525.10	HLA-C	31243846	G	T	0.134529	rs2844613	Primary	1.66413	0.167512	1.11022e-16	5.02165e-12	3.33616e-09
ENSG00000204536.9	CCHCR1	31159020	T	A	0.38565	rs7742179	Conditional 1	-0.61357	0.125739	1.06247e-06	0.0480567	9.35066e-12
ENSG00000204536.9	CCHCR1	31459488	T	G	0.394619	rs7749255	Conditional 2	-0.631744	0.125124	4.44243e-07	0.0167826	1.34792e-11
ENSG00000204536.9	CCHCR1	31129616	A	G	0.774664	rs2073721	Primary	-1.76556	0.121696	1.11022e-16	5.02165e-12	3.33616e-09
ENSG00000204538.3	PSORS1C2	31054511	C	A	0.337444	rs3130955	Conditional 1	-0.673927	0.128206	1.46752e-07	0.00663775	9.35066e-12
ENSG00000204538.3	PSORS1C2	31338844	T	C	0.0964126	rs2853986	Conditional 2	-1.02739	0.207403	7.28554e-07	0.0221604	8.98032e-10
ENSG00000204538.3	PSORS1C2	31105633	C	T	0.837444	rs2074478	Primary	-1.42107	0.162235	9.99201e-16	4.51948e-11	2.65939e-08
ENSG00000204540.6	PSORS1C1	31111834	A	AAAC	0.181614	.	Primary	-1.1673	0.165715	1.86751e-12	8.44692e-08	3.84456e-05
ENSG00000204592.5	HLA-E	30432308	G	A	0.615471	rs2245507	Conditional 1	-0.592925	0.109466	6.07715e-08	0.00274876	1.82413e-05
ENSG00000204592.5	HLA-E	30503945	A	G	0.681614	rs2516644	Conditional 2	-0.549911	0.116501	2.3559e-06	0.0591237	6.89405e-06
ENSG00000204592.5	HLA-E	30458064	G	A	0.587444	rs1264457	Primary	-0.807087	0.101054	1.33227e-15	6.02598e-11	3.44736e-08
ENSG00000204599.10	TRIM39	30260019	G	C	0.343049	rs1264619	Primary	0.541595	0.0867952	4.37801e-10	1.98022e-05	0.00769483
ENSG00000204618.4	RNF39	29916367	G	A	0.0627803	rs200947126	Primary	2.9792	0.222944	1.11022e-16	5.02165e-12	3.33616e-09
ENSG00000204632.7	HLA-G	29873671	T	G	0.831839	rs9259588	Conditional 1	-0.81781	0.172236	2.05255e-06	0.0928388	9.35066e-12
ENSG00000204632.7	HLA-G	29885169	G	C	0.837444	rs1611481	Conditional 2	-0.868756	0.162803	9.48973e-08	0.00292673	1.34792e-11
ENSG00000204632.7	HLA-G	29764548	A	G	0.266816	rs1737000	Primary	-1.4695	0.144414	1.11022e-16	5.02165e-12	3.33616e-09
ENSG00000204642.9	HLA-F	29684994	T	C	0.150224	rs7759272	Primary	1.17079	0.166265	1.89848e-12	8.58702e-08	3.84456e-05
ENSG00000204644.5	ZFP57	29937784	T	C	0.454036	rs2523972	Conditional 1	-0.645118	0.127775	4.44444e-07	0.0201026	9.35066e-12
ENSG00000204644.5	ZFP57	29721666	CA	C	0.45852	.	Conditional 2	0.64132	0.134241	1.77602e-06	0.080331	1.34792e-11
ENSG00000204644.5	ZFP57	29642978	C	CAACTTGAA	0.262332	rs9280637	Primary	2.1308	0.11337	1.11022e-16	5.02165e-12	3.33616e-09
ENSG00000206341.6	HLA-H	30353536	A	G	0.0269058	rs116159669	Conditional 1	2.10269	0.297534	1.5824e-12	7.15736e-08	9.35066e-12
ENSG00000206341.6	HLA-H	29877976	A	G	0.761211	rs415216	Conditional 2	0.765654	0.158682	1.39938e-06	0.0632953	1.34792e-11
ENSG00000206341.6	HLA-H	29918841	G	A	0.127803	rs17179683	Primary	3.11824	0.15617	1.11022e-16	5.02165e-12	3.33616e-09
ENSG00000206503.7	HLA-A	29869972	G	A	0.692825	rs3094180	Conditional 1	-0.668321	0.140547	1.98308e-06	0.0896966	9.35066e-12
ENSG00000206503.7	HLA-A	29950140	A	G	0.139013	rs379221	Conditional 2	-0.95701	0.182244	1.51059e-07	0.00532285	1.34792e-11
ENSG00000206503.7	HLA-A	29837546	A	G	0.598655	rs9258899	Primary	-1.09787	0.128604	1.11022e-16	5.02165e-12	3.33616e-09
ENSG00000213719.4	CLIC1	29939240	G	A	0.557175	rs2523966	Primary	0.533652	0.088487	1.63093e-09	7.37688e-05	0.0276231
ENSG00000213760.6	ATP6V1G2	31464439	G	A	0.0986547	rs9469017	Conditional 1	1.09889	0.226088	1.17103e-06	0.0529668	9.35066e-12
ENSG00000213760.6	ATP6V1G2	31306040	C	T	0.230942	rs28752964	Conditional 2	0.763747	0.142027	7.55309e-08	0.0021546	1.61518e-11
ENSG00000213760.6	ATP6V1G2	31513402	G	A	0.207399	rs2239705	Primary	1.94502	0.138483	1.11022e-16	5.02165e-12	3.33616e-09
ENSG00000213780.6	GTF2H4	31001679	C	A	0.0280269	rs59356242	Conditional 1	-1.72595	0.361957	1.85714e-06	0.0840001	8.86514e-09
ENSG00000213780.6	GTF2H4	30782659	T	G	0.350897	rs9368642	Conditional 2	-0.630848	0.126251	5.82937e-07	0.0196333	2.50454e-09
ENSG00000213780.6	GTF2H4	30872732	G	A	0.229821	rs9501342	Primary	-1.45739	0.13082	1.00808e-13	4.55966e-09	2.18386e-06
ENSG00000214922.5	HLA-F-AS1	29258863	T	A	0.492152	rs1123283	Conditional 1	0.577718	0.119123	1.23607e-06	0.0559087	9.35066e-12
ENSG00000214922.5	HLA-F-AS1	29784192	C	G	0.470852	rs1633097	Conditional 2	-0.628369	0.11962	1.49612e-07	0.00455089	1.34792e-11
ENSG00000214922.5	HLA-F-AS1	30292431	A	G	0.693946	rs2844751	Primary	-1.09418	0.124957	1.11022e-16	5.02165e-12	3.33616e-09
ENSG00000223865.6	HLA-DPB1	33028861	AAATAAATTCAACAGCCATTAGGAAAAAAAAAGAAGGCCATCTTCTTTTTTC	A	0.109865	.	Primary	-1.46581	0.172159	1.11022e-16	5.02165e-12	3.33616e-09
ENSG00000224557.3	HLA-DPB2	33098797	G	A	0.606502	rs3116994	Conditional 1	-0.808856	0.137456	3.99359e-09	0.000180634	1.64345e-11
ENSG00000224557.3	HLA-DPB2	30748297	A	G	0.0627803	rs73425733	Conditional 2	-1.20962	0.251238	1.47479e-06	0.0398797	0.0432738
ENSG00000224557.3	HLA-DPB2	33123629	G	A	0.0840807	rs72881218	Primary	-2.17272	0.222143	1.11022e-16	5.02165e-12	3.33616e-09
ENSG00000227766.1	HCG4P5	29478301	C	T	0.176009	rs2285791	Conditional 1	-0.892048	0.184052	1.25528e-06	0.0567774	9.35066e-12
ENSG00000227766.1	HCG4P5	29719991	T	C	0.838565	rs909726	Primary	-1.44132	0.169745	1.11022e-16	5.02165e-12	3.33616e-09
ENSG00000228962.1	HCG23	32603656	C	G	0.242152	rs9272278	Conditional 1	0.76324	0.154193	7.42503e-07	0.0335841	1.64345e-11
ENSG00000228962.1	HCG23	32428772	A	G	0.459641	rs9268839	Conditional 2	-0.639632	0.124366	2.7017e-07	0.0100131	6.38674e-11
ENSG00000228962.1	HCG23	32350868	A	C	0.420404	rs4373382	Primary	-1.07318	0.121962	1.11022e-16	5.02165e-12	3.33616e-09
ENSG00000230313.1	HCG24	33088345	T	C	0.202915	rs9277687	Primary	1.37926	0.149453	1.11022e-16	5.02165e-12	3.33616e-09
ENSG00000230795.2	HLA-K	30065319	G	A	0.329596	rs1264704	Conditional 1	-0.677442	0.140694	1.47206e-06	0.0665826	9.35066e-12
ENSG00000230795.2	HLA-K	30004554	AT	A	0.882287	.	Conditional 2	-1.25417	0.21051	2.5568e-09	6.57454e-05	1.34792e-11
ENSG00000230795.2	HLA-K	29887522	A	G	0.0269058	rs2394702	Primary	2.99972	0.353352	1.11022e-16	5.02165e-12	3.33616e-09
ENSG00000231389.3	HLA-DPA1	32725671	G	C	0.014574	rs9276573	Conditional 1	2.84325	0.590063	1.44601e-06	0.0654044	9.35066e-12
ENSG00000231389.3	HLA-DPA1	31432861	T	C	0.0616592	rs11759988	Conditional 2	1.15468	0.225612	3.08795e-07	0.00860087	0.00953575
ENSG00000231389.3	HLA-DPA1	33049983	C	T	0.349776	rs9277358	Primary	-1.31736	0.112583	1.11022e-16	5.02165e-12	3.33616e-09
ENSG00000234127.4	TRIM26	30198689	A	T	0.389013	rs916572	Primary	-0.649052	0.0870436	8.88178e-14	4.01732e-09	1.96992e-06
ENSG00000234745.5	HLA-B	31376358	C	A	0.0347534	rs56370321	Conditional 1	-1.58485	0.333815	2.05761e-06	0.0930679	1.64345e-11
ENSG00000234745.5	HLA-B	30936014	T	C	0.326233	rs2844695	Conditional 2	-0.645352	0.129323	6.0306e-07	0.0180912	1.6177e-11
ENSG00000234745.5	HLA-B	31249554	G	A	0.029148	rs62400295	Primary	3.1475	0.332801	1.11022e-16	5.02165e-12	3.33616e-09
ENSG00000237669.1	HCG4P3	29885026	A	G	0.665919	rs2517793	Conditional 1	0.659079	0.137442	1.6241e-06	0.0734597	9.35066e-12
ENSG00000237669.1	HCG4P3	29733123	T	A	0.0459641	rs9258278	Conditional 2	-1.54945	0.309877	5.72681e-07	0.0203536	1.34792e-11
ENSG00000237669.1	HCG4P3	30045731	T	C	0.174888	rs9261306	Primary	-1.55294	0.15584	1.11022e-16	5.02165e-12	3.33616e-09
ENSG00000239257.1	RPL23AP1	29717380	T	C	0.318386	rs12665401	Primary	-1.44385	0.127462	1.11022e-16	5.02165e-12	3.33616e-09
ENSG00000241106.2	HLA-DOB	32604259	C	T	0.327354	rs9272335	Conditional 1	0.597045	0.125976	2.14402e-06	0.0969763	9.35066e-12
ENSG00000241106.2	HLA-DOB	32348690	G	A	0.26009	rs9268450	Conditional 2	0.662004	0.13974	2.16486e-06	0.0667665	2.08483e-05
ENSG00000241106.2	HLA-DOB	32775582	C	A	0.30157	rs2621339	Primary	-1.33644	0.116557	1.11022e-16	5.02165e-12	3.33616e-09
ENSG00000243753.1	HLA-L	30229463	G	A	0.278027	rs2023477	Primary	-0.943482	0.139968	1.57651e-11	7.13069e-07	0.000299707
ENSG00000250264.1	TAP2	32603734	C	T	0.119955	rs116235343	Conditional 1	1.00508	0.2067	1.15902e-06	0.0524238	2.09188e-10
ENSG00000250264.1	TAP2	32418018	C	T	0.706278	rs6937696	Conditional 2	0.652116	0.133811	1.09688e-06	0.0478274	1.23443e-10
ENSG00000250264.1	TAP2	32797168	G	A	0.272422	rs241442	Primary	1.35805	0.131777	3.88578e-15	1.75758e-10	9.28136e-08
ENSG00000250535.1	STK19P	32607376	G	A	0.207399	rs34250758	Conditional 1	0.738635	0.154337	1.70265e-06	0.0770124	9.35066e-12
ENSG00000250535.1	STK19P	31019810	G	T	0.029148	rs12214258	Conditional 2	1.82702	0.360532	4.02922e-07	0.0148299	1.34792e-11
ENSG00000250535.1	STK19P	31819848	C	T	0.0235426	rs11961665	Primary	4.16126	0.380017	1.11022e-16	5.02165e-12	3.33616e-09
ENSG00000254870.1	ATP6V1G2-DDX39B	31320810	A	G	0.846413	rs2596503	Conditional 1	-0.676723	0.136408	7.01288e-07	0.03172	9.35066e-12
ENSG00000254870.1	ATP6V1G2-DDX39B	31458983	G	A	0.606502	.	Conditional 2	-0.517904	0.103933	6.25937e-07	0.0230908	1.34792e-11
ENSG00000254870.1	ATP6V1G2-DDX39B	31469251	C	G	0.788117	rs3094003	Primary	-0.964457	0.100995	3.33067e-16	1.50649e-11	9.4019e-09
ENSG00000263020.1	CSNK2B-LY6G5B-1181	31668049	C	T	0.202915	rs9267542	Conditional 1	-0.665865	0.140221	2.04751e-06	0.0926107	1.9486e-06
ENSG00000263020.1	CSNK2B-LY6G5B-1181	31629096	T	C	0.265695	rs707920	Primary	-0.841259	0.127107	3.62891e-11	1.64139e-06	0.000676089
ENSG00000272221.1	XXbac-BPG181B23.7	32584410	T	G	0.124439	rs28383243	Conditional 1	-1.11905	0.206154	5.69284e-08	0.00257493	9.35066e-12
ENSG00000272221.1	XXbac-BPG181B23.7	32221791	A	C	0.168161	rs41264790	Conditional 2	-0.884848	0.185625	1.87134e-06	0.0846428	1.34792e-11
ENSG00000272221.1	XXbac-BPG181B23.7	31447135	T	C	0.219731	rs2516514	Primary	-1.23411	0.145536	1.11022e-16	5.02165e-12	3.33616e-09
