# Supplementary material for: Systematic genetic analysis of the MHC region reveals mechanistic underpinnings of HLA type associations with disease
Source: eLife journal article supplement (doi:10.7554/elife.48476), 2019-11-20
Supplement: supp [file elife-48476-supp-v1.zip › elife_poa_e48476_Supplementary_file_7.xlsx]

## Sheet: Table S7
eGene	Gene name	eQTL variant	Samples with ASE data (N)	Samples with ASE data and heterozygous eQTL variant (N)	Mean AIF in heterozygous samples	Mean AIF in homozygous samples	p-value (Mann-Whitney U test)	Benjamini-Hochberg-adjusted p-value
ENSG00000066379.10	ZNRD1	var_29720961_C_G_rs4713243	83	40	0.632081	0.609016	0.12966	0.358321
ENSG00000066379.10	ZNRD1	var_29723674_T_C_rs4947236	83	40	0.632081	0.609016	0.12966	0.358321
ENSG00000066379.10	ZNRD1	var_29730504_A_G_rs9258275	83	40	0.632081	0.609016	0.12966	0.358321
ENSG00000066379.10	ZNRD1	var_29733123_T_A_rs9258278	83	20	0.648148	0.611238	0.0137014	0.0795023
ENSG00000066379.10	ZNRD1	var_29733223_G_A_rs1633041	83	53	0.636167	0.591804	0.00389815	0.0316931
ENSG00000066379.10	ZNRD1	var_29733288_A_C_rs1737059	83	55	0.637209	0.586587	0.00115159	0.0142146
ENSG00000066379.10	ZNRD1	var_29733390_C_T_rs2735049	83	38	0.619972	0.620267	0.809628	1
ENSG00000066379.10	ZNRD1	var_29733420_T_C_rs1737057	83	55	0.637209	0.586587	0.00115159	0.0142146
ENSG00000066379.10	ZNRD1	var_29733537_G_C_rs1737056	83	55	0.637209	0.586587	0.00115159	0.0142146
ENSG00000066379.10	ZNRD1	var_29733807_C_A_rs1737054	83	55	0.637209	0.586587	0.00115159	0.0142146
ENSG00000066379.10	ZNRD1	var_29733838_T_A_rs2517931	83	38	0.619972	0.620267	0.809628	1
ENSG00000066379.10	ZNRD1	var_29734098_G_A_rs2735046	83	43	0.614611	0.626066	0.29002	0.602954
ENSG00000066379.10	ZNRD1	var_29734477_A_G_rs2523754	83	43	0.614611	0.626066	0.29002	0.602954
ENSG00000066379.10	ZNRD1	var_29734696_A_G_rs1737050	83	55	0.637209	0.586587	0.00115159	0.0142146
ENSG00000066379.10	ZNRD1	var_29734727_A_G_rs2523753	83	43	0.614611	0.626066	0.29002	0.602954
ENSG00000066379.10	ZNRD1	var_29735134_G_A_rs1612392	83	55	0.637209	0.586587	0.00115159	0.0142146
ENSG00000066379.10	ZNRD1	var_29735391_T_C_rs2735044	83	55	0.637209	0.586587	0.00115159	0.0142146
ENSG00000066379.10	ZNRD1	var_29735455_C_A_rs9258288	83	55	0.637209	0.586587	0.00115159	0.0142146
ENSG00000066379.10	ZNRD1	var_29735469_G_A_rs9258289	83	55	0.637209	0.586587	0.00115159	0.0142146
ENSG00000066379.10	ZNRD1	var_29735492_T_C_rs9258290	83	56	0.634192	0.590971	0.00659174	0.043845
ENSG00000066379.10	ZNRD1	var_29735493_G_A_rs9258291	83	56	0.634192	0.590971	0.00659174	0.043845
ENSG00000066379.10	ZNRD1	var_29735533_T_C_rs2844844	83	35	0.620944	0.61954	0.996342	1
ENSG00000066379.10	ZNRD1	var_29735659_G_A_rs9258294	83	23	0.658185	0.605545	0.000716964	0.0101011
ENSG00000066379.10	ZNRD1	var_29736011_G_C_rs1737044	83	53	0.636167	0.591804	0.00389815	0.0316931
ENSG00000066379.10	ZNRD1	var_29736152_A_G_rs1737042	83	54	0.630782	0.600301	0.0519369	0.197131
ENSG00000066379.10	ZNRD1	var_29736163_A_G_rs3094560	83	35	0.61879	0.62111	0.649785	0.957267
ENSG00000066379.10	ZNRD1	var_29736169_GC_G_rs11310284	83	35	0.620289	0.620017	0.7309	1
ENSG00000066379.10	ZNRD1	var_29736229_C_A_rs1737041	83	54	0.635812	0.590934	0.00341783	0.0316931
ENSG00000066379.10	ZNRD1	var_29736601_T_C_rs1737040	83	53	0.636167	0.591804	0.00389815	0.0316931
ENSG00000066379.10	ZNRD1	var_29736691_T_C_rs1737038	83	54	0.630486	0.600851	0.0567213	0.208136
ENSG00000066379.10	ZNRD1	var_29736792_C_T_rs1737037	83	53	0.636167	0.591804	0.00389815	0.0316931
ENSG00000066379.10	ZNRD1	var_29736995_T_C_rs1737036	83	53	0.632114	0.598964	0.0325602	0.146645
ENSG00000066379.10	ZNRD1	var_29737022_C_T_rs1737035	83	53	0.636167	0.591804	0.00389815	0.0316931
ENSG00000066379.10	ZNRD1	var_29737074_C_T_rs2735043	83	35	0.620944	0.61954	0.996342	1
ENSG00000066379.10	ZNRD1	var_29737159_G_C_rs1737034	83	53	0.636167	0.591804	0.00389815	0.0316931
ENSG00000066379.10	ZNRD1	var_29737162_G_A_rs2247422	83	35	0.620944	0.61954	0.996342	1
ENSG00000066379.10	ZNRD1	var_29737222_A_C_rs1737032	83	53	0.636167	0.591804	0.00389815	0.0316931
ENSG00000066379.10	ZNRD1	var_29737481_C_T_rs1737031	83	53	0.632114	0.598964	0.0325602	0.146645
ENSG00000066379.10	ZNRD1	var_29737595_A_G_rs1737029	83	53	0.632114	0.598964	0.0325602	0.146645
ENSG00000066379.10	ZNRD1	var_29737660_AG_A_rs377723602	83	53	0.636167	0.591804	0.00389815	0.0316931
ENSG00000066379.10	ZNRD1	var_29737677_T_C_rs2844843	83	35	0.620944	0.61954	0.996342	1
ENSG00000066379.10	ZNRD1	var_29738287_A_G_rs1611270	83	53	0.636167	0.591804	0.00389815	0.0316931
ENSG00000066379.10	ZNRD1	var_29738298_G_T_rs1611271	83	53	0.636167	0.591804	0.00389815	0.0316931
ENSG00000066379.10	ZNRD1	var_29738665_C_G_rs1610726	83	53	0.632114	0.598964	0.0325602	0.146645
ENSG00000066379.10	ZNRD1	var_29738682_ACACTCTCCGGTGAGC_A_rs143877566	83	35	0.620944	0.61954	0.996342	1
ENSG00000066379.10	ZNRD1	var_29739057_C_T_rs885940	83	53	0.636167	0.591804	0.00389815	0.0316931
ENSG00000066379.10	ZNRD1	var_29739272_T_C_rs885939	83	53	0.636167	0.591804	0.00389815	0.0316931
ENSG00000066379.10	ZNRD1	var_29739322_A_C_rs885938	83	53	0.636167	0.591804	0.00389815	0.0316931
ENSG00000066379.10	ZNRD1	var_29739434_A_C_rs1610635	83	53	0.636167	0.591804	0.00389815	0.0316931
ENSG00000066379.10	ZNRD1	var_29739639_T_C_rs1610636	83	53	0.636167	0.591804	0.00389815	0.0316931
ENSG00000066379.10	ZNRD1	var_29739906_T_G_rs1610637	83	53	0.636167	0.591804	0.00389815	0.0316931
ENSG00000066379.10	ZNRD1	var_29740166_A_C_rs2844841	83	30	0.626062	0.616775	0.516147	0.827183
ENSG00000066379.10	ZNRD1	var_29741660_C_T_rs1611275	83	51	0.634781	0.596785	0.0136895	0.079477
ENSG00000066379.10	ZNRD1	var_29742257_T_G_rs2743945	83	30	0.626062	0.616775	0.516147	0.827183
ENSG00000066379.10	ZNRD1	var_29742846_G_A_rs1419641	83	53	0.636167	0.591804	0.00389815	0.0316931
ENSG00000066379.10	ZNRD1	var_29743400_A_T_rs1633035	83	59	0.629802	0.59636	0.0519473	0.197131
ENSG00000066379.10	ZNRD1	var_29743517_A_G_rs9258305	83	23	0.658185	0.605545	0.000716964	0.0101011
ENSG00000066379.10	ZNRD1	var_29743563_A_G_rs1633034	83	59	0.629802	0.59636	0.0519473	0.197131
ENSG00000066379.10	ZNRD1	var_29743788_T_C_rs1633033	83	53	0.632114	0.598964	0.0325602	0.146645
ENSG00000066379.10	ZNRD1	var_29744404_CAA_C_.	83	53	0.636167	0.591804	0.00389815	0.0316931
ENSG00000066379.10	ZNRD1	var_29744408_A_ACAT_.	83	53	0.636167	0.591804	0.00389815	0.0316931
ENSG00000066379.10	ZNRD1	var_29744411_A_T_rs9258309	83	53	0.636167	0.591804	0.00389815	0.0316931
ENSG00000066379.10	ZNRD1	var_29744412_C_A_.	83	53	0.636167	0.591804	0.00389815	0.0316931
ENSG00000066379.10	ZNRD1	var_29744419_T_C_rs2844840	83	53	0.632114	0.598964	0.0325602	0.146645
ENSG00000066379.10	ZNRD1	var_29744609_T_C_rs2844838	83	53	0.632114	0.598964	0.0325602	0.146645
ENSG00000066379.10	ZNRD1	var_29744610_G_C_rs2844837	83	53	0.636167	0.591804	0.00389815	0.0316931
ENSG00000066379.10	ZNRD1	var_29744623_T_A_rs2975038	83	30	0.626062	0.616775	0.516147	0.827183
ENSG00000066379.10	ZNRD1	var_29744833_C_T_rs1633032	83	53	0.632114	0.598964	0.0325602	0.146645
ENSG00000066379.10	ZNRD1	var_29745075_G_T_rs2517930	83	30	0.626062	0.616775	0.516147	0.827183
ENSG00000066379.10	ZNRD1	var_29745175_A_G_rs2517929	83	30	0.626062	0.616775	0.516147	0.827183
ENSG00000066379.10	ZNRD1	var_29745350_C_T_rs2517928	83	30	0.626062	0.616775	0.516147	0.827183
ENSG00000066379.10	ZNRD1	var_29745351_G_C_rs1618670	83	59	0.629802	0.59636	0.0519473	0.197131
ENSG00000066379.10	ZNRD1	var_29745439_A_G_rs2394685	83	48	0.629175	0.60773	0.193051	0.468435
ENSG00000066379.10	ZNRD1	var_29745726_G_A_rs1615962	83	53	0.636167	0.591804	0.00389815	0.0316931
ENSG00000066379.10	ZNRD1	var_29745794_T_C_rs1633030	83	53	0.632114	0.598964	0.0325602	0.146645
ENSG00000066379.10	ZNRD1	var_29745884_G_A_rs1614309	83	53	0.632114	0.598964	0.0325602	0.146645
ENSG00000066379.10	ZNRD1	var_29746305_T_G_rs1633029	83	53	0.636167	0.591804	0.00389815	0.0316931
ENSG00000066379.10	ZNRD1	var_29746367_T_G_rs1633028	83	53	0.632114	0.598964	0.0325602	0.146645
ENSG00000066379.10	ZNRD1	var_29746794_T_C_rs1633023	83	53	0.636167	0.591804	0.00389815	0.0316931
ENSG00000066379.10	ZNRD1	var_29746803_A_T_rs1633022	83	53	0.636167	0.591804	0.00389815	0.0316931
ENSG00000066379.10	ZNRD1	var_29747134_C_T_rs1633020	83	53	0.632114	0.598964	0.0325602	0.146645
ENSG00000066379.10	ZNRD1	var_29747373_A_G_rs2735042	83	53	0.632114	0.598964	0.0325602	0.146645
ENSG00000066379.10	ZNRD1	var_29747561_T_C_rs1633019	83	59	0.629802	0.59636	0.0519473	0.197131
ENSG00000066379.10	ZNRD1	var_29747587_C_T_rs1633018	83	53	0.632114	0.598964	0.0325602	0.146645
ENSG00000066379.10	ZNRD1	var_29747685_G_T_rs1737020	83	53	0.632114	0.598964	0.0325602	0.146645
ENSG00000066379.10	ZNRD1	var_29747690_G_T_rs1737019	83	53	0.632114	0.598964	0.0325602	0.146645
ENSG00000066379.10	ZNRD1	var_29748139_G_A_rs144729306	83	53	0.632114	0.598964	0.0325602	0.146645
ENSG00000066379.10	ZNRD1	var_29748206_T_C_rs144690858	83	53	0.636167	0.591804	0.00389815	0.0316931
ENSG00000066379.10	ZNRD1	var_29748308_G_A_rs139897235	83	59	0.629802	0.59636	0.0519473	0.197131
ENSG00000066379.10	ZNRD1	var_29748523_C_T_rs138894902	83	53	0.636167	0.591804	0.00389815	0.0316931
ENSG00000066379.10	ZNRD1	var_29748690_G_A_rs146668923	83	53	0.632114	0.598964	0.0325602	0.146645
ENSG00000066379.10	ZNRD1	var_29748691_A_G_rs140564206	83	53	0.632114	0.598964	0.0325602	0.146645
ENSG00000066379.10	ZNRD1	var_29749331_G_A_rs148401298	83	53	0.636167	0.591804	0.00389815	0.0316931
ENSG00000066379.10	ZNRD1	var_29752221_A_G_rs148564564	83	53	0.632114	0.598964	0.0325602	0.146645
ENSG00000066379.10	ZNRD1	var_29752278_C_T_rs138245928	83	53	0.632114	0.598964	0.0325602	0.146645
ENSG00000066379.10	ZNRD1	var_29753370_C_T_rs9258382	83	53	0.632114	0.598964	0.0325602	0.146645
ENSG00000066379.10	ZNRD1	var_29753422_G_A_rs1633016	83	59	0.629802	0.59636	0.0519473	0.197131
ENSG00000066379.10	ZNRD1	var_29753729_T_A_rs1002044	83	53	0.636167	0.591804	0.00389815	0.0316931
ENSG00000066379.10	ZNRD1	var_29753868_C_A_rs9258384	83	20	0.648148	0.611238	0.0137014	0.0795023
ENSG00000066379.10	ZNRD1	var_29754016_C_T_rs1002046	83	53	0.636167	0.591804	0.00389815	0.0316931
ENSG00000066379.10	ZNRD1	var_29754357_C_T_rs1737015	83	62	0.632971	0.582226	0.00403604	0.0316931
ENSG00000066379.10	ZNRD1	var_29755760_T_C_rs2743940	83	30	0.626062	0.616775	0.516147	0.827183
ENSG00000066379.10	ZNRD1	var_29756301_T_C_rs1737013	83	53	0.636167	0.591804	0.00389815	0.0316931
ENSG00000066379.10	ZNRD1	var_29756672_C_T_rs1633015	83	53	0.636167	0.591804	0.00389815	0.0316931
ENSG00000066379.10	ZNRD1	var_29757411_G_T_rs9258393	83	23	0.658185	0.605545	0.000716964	0.0101011
ENSG00000066379.10	ZNRD1	var_29757608_T_C_rs1633014	83	59	0.629802	0.59636	0.0519473	0.197131
ENSG00000066379.10	ZNRD1	var_29757715_C_T_rs2735035	83	30	0.626062	0.616775	0.516147	0.827183
ENSG00000066379.10	ZNRD1	var_29758394_TTTC_T_rs140204695	83	59	0.633443	0.587409	0.00619892	0.0420509
ENSG00000066379.10	ZNRD1	var_29759310_G_A_rs1610643	83	53	0.636167	0.591804	0.00389815	0.0316931
ENSG00000066379.10	ZNRD1	var_29759445_C_T_rs1610644	83	53	0.636167	0.591804	0.00389815	0.0316931
ENSG00000066379.10	ZNRD1	var_29759885_G_A_rs1611208	83	53	0.636167	0.591804	0.00389815	0.0316931
ENSG00000066379.10	ZNRD1	var_29759923_T_C_rs1611209	83	53	0.636167	0.591804	0.00389815	0.0316931
ENSG00000066379.10	ZNRD1	var_29760523_C_T_rs1611212	83	53	0.636167	0.591804	0.00389815	0.0316931
ENSG00000066379.10	ZNRD1	var_29760819_A_C_rs1610646	83	59	0.633443	0.587409	0.00619892	0.0420509
ENSG00000066379.10	ZNRD1	var_29762303_C_T_rs9357085	83	30	0.626062	0.616775	0.516147	0.827183
ENSG00000066379.10	ZNRD1	var_29762339_TA_T_rs137861925	83	53	0.636167	0.591804	0.00389815	0.0316931
ENSG00000066379.10	ZNRD1	var_29762340_A_*_.	83	50	0.634185	0.598839	0.0197606	0.100103
ENSG00000066379.10	ZNRD1	var_29762389_CA_C_rs28724922	83	30	0.626062	0.616775	0.516147	0.827183
ENSG00000066379.10	ZNRD1	var_29762693_C_T_rs1633011	83	53	0.636167	0.591804	0.00389815	0.0316931
ENSG00000066379.10	ZNRD1	var_29762903_G_A_rs1737002	83	55	0.637209	0.586587	0.00115159	0.0142146
ENSG00000066379.10	ZNRD1	var_29763087_A_T_rs1633009	83	53	0.636167	0.591804	0.00389815	0.0316931
ENSG00000066379.10	ZNRD1	var_29763762_G_A_rs3129185	83	53	0.632114	0.598964	0.0325602	0.146645
ENSG00000066379.10	ZNRD1	var_29764363_C_T_rs1633007	83	53	0.636167	0.591804	0.00389815	0.0316931
ENSG00000066379.10	ZNRD1	var_29764374_A_T_rs1633006	83	53	0.636167	0.591804	0.00389815	0.0316931
ENSG00000066379.10	ZNRD1	var_29764548_A_G_rs1737000	83	55	0.637209	0.586587	0.00115159	0.0142146
ENSG00000066379.10	ZNRD1	var_29764656_G_A_rs1736999	83	56	0.634192	0.590971	0.00659174	0.043845
ENSG00000066379.10	ZNRD1	var_29764663_T_C_rs1633004	83	54	0.637583	0.587637	0.00135341	0.016184
ENSG00000066379.10	ZNRD1	var_29765001_G_A_rs1630969	83	55	0.637209	0.586587	0.00115159	0.0142146
ENSG00000066379.10	ZNRD1	var_29765047_A_T_rs1633002	83	54	0.637583	0.587637	0.00135341	0.016184
ENSG00000066379.10	ZNRD1	var_29765270_C_T_rs1633001	83	55	0.633303	0.594259	0.0127842	0.075764
ENSG00000066379.10	ZNRD1	var_29765271_G_A_rs9366749	83	43	0.618264	0.62214	0.720268	1
ENSG00000066379.10	ZNRD1	var_29765291_A_G_rs1629068	83	55	0.637209	0.586587	0.00115159	0.0142146
ENSG00000066379.10	ZNRD1	var_29766085_T_C_rs1632999	83	59	0.637212	0.578142	0.000190377	0.00359687
ENSG00000066379.10	ZNRD1	var_29766596_C_A_rs1736994	83	53	0.636167	0.591804	0.00389815	0.0316931
ENSG00000066379.10	ZNRD1	var_29766660_C_CAA_.	83	55	0.633227	0.594408	0.0117816	0.0711906
ENSG00000066379.10	ZNRD1	var_29766785_CAGAG_C_.	83	55	0.635303	0.59033	0.00335953	0.0316357
ENSG00000066379.10	ZNRD1	var_29766926_G_C_rs1736991	83	59	0.629802	0.59636	0.0519473	0.197131
ENSG00000066379.10	ZNRD1	var_29766969_G_A_rs28514417	83	59	0.633443	0.587409	0.00619892	0.0420509
ENSG00000066379.10	ZNRD1	var_29767088_C_CA_rs9280706	83	58	0.632444	0.591568	0.0144164	0.0821871
ENSG00000066379.10	ZNRD1	var_29767202_CCACTG_C_rs368620511	83	58	0.634676	0.586389	0.00357709	0.0316931
ENSG00000066379.10	ZNRD1	var_29767388_C_T_rs1632997	83	59	0.633443	0.587409	0.00619892	0.0420509
ENSG00000066379.10	ZNRD1	var_29767880_G_A_rs1736986	83	59	0.633443	0.587409	0.00619892	0.0420509
ENSG00000066379.10	ZNRD1	var_29767941_A_G_rs1736985	83	54	0.637583	0.587637	0.00135341	0.016184
ENSG00000066379.10	ZNRD1	var_29768049_G_A_rs1736983	83	53	0.636167	0.591804	0.00389815	0.0316931
ENSG00000066379.10	ZNRD1	var_29768123_C_A_rs7741100	83	23	0.658185	0.605545	0.000716964	0.0101011
ENSG00000066379.10	ZNRD1	var_29768344_T_C_rs1611185	83	45	0.623528	0.61611	0.726312	1
ENSG00000066379.10	ZNRD1	var_29768425_GAGA_G_.	83	60	0.633169	0.586122	0.00522395	0.0368351
ENSG00000066379.10	ZNRD1	var_29768436_G_T_rs1610708	83	54	0.635812	0.590934	0.00341783	0.0316931
ENSG00000066379.10	ZNRD1	var_29768471_C_T_rs1610709	83	61	0.631665	0.588154	0.0119943	0.0723052
ENSG00000066379.10	ZNRD1	var_29768515_AG_A_rs11344221	83	54	0.635812	0.590934	0.00341783	0.0316931
ENSG00000066379.10	ZNRD1	var_29768780_T_C_rs1610648	83	63	0.630356	0.587925	0.0211509	0.106318
ENSG00000066379.10	ZNRD1	var_29769280_C_T_rs1610653	83	61	0.63095	0.590135	0.0194436	0.0985232
ENSG00000066379.10	ZNRD1	var_29769332_G_A_rs1610710	83	53	0.636167	0.591804	0.00389815	0.0316931
ENSG00000066379.10	ZNRD1	var_29769497_A_C_rs1610711	83	53	0.636167	0.591804	0.00389815	0.0316931
ENSG00000066379.10	ZNRD1	var_29769701_C_A_rs9258441	83	20	0.648148	0.611238	0.0137014	0.0795023
ENSG00000066379.10	ZNRD1	var_29769717_T_C_rs1610713	83	60	0.629	0.596997	0.0693487	0.242791
ENSG00000066379.10	ZNRD1	var_29769829_T_C_rs1610714	83	53	0.636167	0.591804	0.00389815	0.0316931
ENSG00000066379.10	ZNRD1	var_29769907_C_T_rs1610654	83	53	0.636167	0.591804	0.00389815	0.0316931
ENSG00000066379.10	ZNRD1	var_29770187_A_C_rs1610655	83	54	0.637583	0.587637	0.00135341	0.016184
ENSG00000066379.10	ZNRD1	var_29770451_G_A_rs1610715	83	53	0.636167	0.591804	0.00389815	0.0316931
ENSG00000066379.10	ZNRD1	var_29771080_G_A_rs1610658	83	53	0.636167	0.591804	0.00389815	0.0316931
ENSG00000066379.10	ZNRD1	var_29771298_A_T_rs1611190	83	35	0.620944	0.61954	0.996342	1
ENSG00000066379.10	ZNRD1	var_29771421_G_A_rs1610659	83	53	0.636167	0.591804	0.00389815	0.0316931
ENSG00000066379.10	ZNRD1	var_29771654_A_G_rs1610661	83	53	0.636167	0.591804	0.00389815	0.0316931
ENSG00000066379.10	ZNRD1	var_29771806_C_G_rs1611191	83	53	0.636167	0.591804	0.00389815	0.0316931
ENSG00000066379.10	ZNRD1	var_29772059_A_G_rs1611195	83	55	0.637209	0.586587	0.00115159	0.0142146
ENSG00000066379.10	ZNRD1	var_29772098_C_T_rs2394688	83	30	0.626062	0.616775	0.516147	0.827183
ENSG00000066379.10	ZNRD1	var_29772395_G_A_rs1632988	83	55	0.637209	0.586587	0.00115159	0.0142146
ENSG00000066379.10	ZNRD1	var_29772549_C_G_rs1632987	83	53	0.636167	0.591804	0.00389815	0.0316931
ENSG00000066379.10	ZNRD1	var_29773158_C_T_rs2394173	83	30	0.626062	0.616775	0.516147	0.827183
ENSG00000066379.10	ZNRD1	var_29773509_C_T_rs1632983	83	59	0.629802	0.59636	0.0519473	0.197131
ENSG00000066379.10	ZNRD1	var_29773720_T_C_rs1632980	83	56	0.634192	0.590971	0.00659174	0.043845
ENSG00000066379.10	ZNRD1	var_29773954_T_C_rs1624302	83	53	0.636167	0.591804	0.00389815	0.0316931
ENSG00000066379.10	ZNRD1	var_29774506_TTTC_T_rs370670922	82	17	0.648756	0.611216	0.0173495	0.0939133
ENSG00000066379.10	ZNRD1	var_29774620_G_A_rs2248870	83	53	0.636167	0.591804	0.00389815	0.0316931
ENSG00000066379.10	ZNRD1	var_29774627_G_A_rs2248871	83	53	0.636167	0.591804	0.00389815	0.0316931
ENSG00000066379.10	ZNRD1	var_29774709_C_T_rs9258448	83	53	0.636167	0.591804	0.00389815	0.0316931
ENSG00000066379.10	ZNRD1	var_29774761_A_C_rs2523410	83	53	0.636167	0.591804	0.00389815	0.0316931
ENSG00000066379.10	ZNRD1	var_29774959_T_C_rs1632979	83	53	0.636167	0.591804	0.00389815	0.0316931
ENSG00000066379.10	ZNRD1	var_29774989_T_A_rs1736975	83	53	0.636167	0.591804	0.00389815	0.0316931
ENSG00000066379.10	ZNRD1	var_29775237_A_T_rs1736974	83	53	0.636167	0.591804	0.00389815	0.0316931
ENSG00000066379.10	ZNRD1	var_29775346_A_G_rs1736973	83	53	0.636167	0.591804	0.00389815	0.0316931
ENSG00000066379.10	ZNRD1	var_29775662_A_G_rs2523409	83	37	0.617526	0.622228	0.68507	0.984933
ENSG00000066379.10	ZNRD1	var_29775950_A_C_rs2735030	83	35	0.620944	0.61954	0.996342	1
ENSG00000066379.10	ZNRD1	var_29776087_T_C_rs9258451	83	23	0.658185	0.605545	0.000716964	0.0101011
ENSG00000066379.10	ZNRD1	var_29776152_A_C_rs1736972	83	53	0.636167	0.591804	0.00389815	0.0316931
ENSG00000066379.10	ZNRD1	var_29776239_T_C_rs1632976	83	53	0.636167	0.591804	0.00389815	0.0316931
ENSG00000066379.10	ZNRD1	var_29776322_G_T_rs1736971	83	53	0.636167	0.591804	0.00389815	0.0316931
ENSG00000066379.10	ZNRD1	var_29776390_A_T_rs1736969	83	53	0.636167	0.591804	0.00389815	0.0316931
ENSG00000066379.10	ZNRD1	var_29776715_A_G_rs1736968	83	53	0.636167	0.591804	0.00389815	0.0316931
ENSG00000066379.10	ZNRD1	var_29776878_G_A_rs1736967	83	53	0.636167	0.591804	0.00389815	0.0316931
ENSG00000066379.10	ZNRD1	var_29777146_GA_G_rs35462222	83	53	0.636167	0.591804	0.00389815	0.0316931
ENSG00000066379.10	ZNRD1	var_29777394_A_G_rs1736966	83	53	0.636167	0.591804	0.00389815	0.0316931
ENSG00000066379.10	ZNRD1	var_29777585_C_A_rs2735029	83	53	0.636167	0.591804	0.00389815	0.0316931
ENSG00000066379.10	ZNRD1	var_29777624_AACTC_A_.	83	53	0.636167	0.591804	0.00389815	0.0316931
ENSG00000066379.10	ZNRD1	var_29777684_C_CAA_.	83	30	0.626062	0.616775	0.516147	0.827183
ENSG00000066379.10	ZNRD1	var_29777892_G_A_rs1736964	83	55	0.637209	0.586587	0.00115159	0.0142146
ENSG00000066379.10	ZNRD1	var_29777983_G_A_rs1736963	83	53	0.636167	0.591804	0.00389815	0.0316931
ENSG00000066379.10	ZNRD1	var_29778171_T_G_rs2517920	83	54	0.637583	0.587637	0.00135341	0.016184
ENSG00000066379.10	ZNRD1	var_29778174_T_C_rs2517919	83	54	0.637583	0.587637	0.00135341	0.016184
ENSG00000066379.10	ZNRD1	var_29778213_C_G_rs1611172	83	55	0.633087	0.594685	0.0150184	0.084285
ENSG00000066379.10	ZNRD1	var_29778240_T_C_rs1611173	83	35	0.620944	0.61954	0.996342	1
ENSG00000066379.10	ZNRD1	var_29778318_A_G_rs1611175	83	53	0.636167	0.591804	0.00389815	0.0316931
ENSG00000066379.10	ZNRD1	var_29778419_T_C_rs1610697	83	53	0.636167	0.591804	0.00389815	0.0316931
ENSG00000066379.10	ZNRD1	var_29778607_T_C_rs1610662	83	55	0.637209	0.586587	0.00115159	0.0142146
ENSG00000066379.10	ZNRD1	var_29778898_T_C_rs1610698	83	54	0.634464	0.593444	0.00781425	0.0494717
ENSG00000066379.10	ZNRD1	var_29778957_CTG_C_.	83	53	0.636167	0.591804	0.00389815	0.0316931
ENSG00000066379.10	ZNRD1	var_29779203_G_A_rs1610665	83	55	0.637209	0.586587	0.00115159	0.0142146
ENSG00000066379.10	ZNRD1	var_29779806_C_T_rs1610666	83	54	0.637583	0.587637	0.00135341	0.016184
ENSG00000066379.10	ZNRD1	var_29780328_C_T_rs9258467	83	23	0.658185	0.605545	0.000716964	0.0101011
ENSG00000066379.10	ZNRD1	var_29780529_C_T_rs753544	83	53	0.636167	0.591804	0.00389815	0.0316931
ENSG00000066379.10	ZNRD1	var_29781011_T_A_rs2743936	83	35	0.620944	0.61954	0.996342	1
ENSG00000066379.10	ZNRD1	var_29781521_G_T_rs1610702	83	50	0.644851	0.582678	2.65579e-05	0.000736531
ENSG00000066379.10	ZNRD1	var_29781582_G_A_rs1611184	83	55	0.637209	0.586587	0.00115159	0.0142146
ENSG00000066379.10	ZNRD1	var_29781703_T_C_rs1610673	83	55	0.637209	0.586587	0.00115159	0.0142146
ENSG00000066379.10	ZNRD1	var_29781886_C_T_rs1610674	83	55	0.637209	0.586587	0.00115159	0.0142146
ENSG00000066379.10	ZNRD1	var_29781987_A_C_rs1610704	83	55	0.637209	0.586587	0.00115159	0.0142146
ENSG00000066379.10	ZNRD1	var_29782470_C_T_rs1736959	83	54	0.637583	0.587637	0.00135341	0.016184
ENSG00000066379.10	ZNRD1	var_29782533_G_A_rs1736958	83	54	0.637583	0.587637	0.00135341	0.016184
ENSG00000066379.10	ZNRD1	var_29782633_T_C_rs1736957	83	53	0.638247	0.588129	0.00063292	0.00938489
ENSG00000066379.10	ZNRD1	var_29783064_G_A_rs1077433	83	55	0.637209	0.586587	0.00115159	0.0142146
ENSG00000066379.10	ZNRD1	var_29783529_G_A_rs1111673	83	53	0.636167	0.591804	0.00389815	0.0316931
ENSG00000066379.10	ZNRD1	var_29783660_C_T_rs1079599	83	53	0.636167	0.591804	0.00389815	0.0316931
ENSG00000066379.10	ZNRD1	var_29784503_A_G_rs6457057	83	30	0.626062	0.616775	0.516147	0.827183
ENSG00000066379.10	ZNRD1	var_29784556_C_A_rs9258471	83	12	0.650163	0.615056	0.0483023	0.186815
ENSG00000066379.10	ZNRD1	var_29784693_C_T_rs6457058	83	30	0.626062	0.616775	0.516147	0.827183
ENSG00000066379.10	ZNRD1	var_29785101_G_A_rs7776026	83	30	0.626062	0.616775	0.516147	0.827183
ENSG00000066379.10	ZNRD1	var_29785149_A_C_rs1620173	83	53	0.636167	0.591804	0.00389815	0.0316931
ENSG00000066379.10	ZNRD1	var_29786005_C_T_rs1736950	83	49	0.635943	0.597346	0.0133835	0.078431
ENSG00000066379.10	ZNRD1	var_29786420_C_T_rs1736948	83	49	0.635943	0.597346	0.0133835	0.078431
ENSG00000066379.10	ZNRD1	var_29786644_A_G_rs1633047	83	49	0.635943	0.597346	0.0133835	0.078431
ENSG00000066379.10	ZNRD1	var_29787202_G_A_rs6911139	83	30	0.626062	0.616775	0.516147	0.827183
ENSG00000066379.10	ZNRD1	var_29787300_G_T_rs1633039	83	49	0.635943	0.597346	0.0133835	0.078431
ENSG00000066379.10	ZNRD1	var_29787976_T_G_rs2743930	83	35	0.620944	0.61954	0.996342	1
ENSG00000066379.10	ZNRD1	var_29788392_A_G_rs1155143	83	49	0.635943	0.597346	0.0133835	0.078431
ENSG00000066379.10	ZNRD1	var_29788606_C_T_rs1610675	83	49	0.635943	0.597346	0.0133835	0.078431
ENSG00000066379.10	ZNRD1	var_29790880_A_G_rs1611155	83	49	0.635943	0.597346	0.0133835	0.078431
ENSG00000066379.10	ZNRD1	var_29790905_G_A_rs1611156	83	35	0.620944	0.61954	0.996342	1
ENSG00000066379.10	ZNRD1	var_29791033_C_T_rs6934957	83	30	0.626062	0.616775	0.516147	0.827183
ENSG00000066379.10	ZNRD1	var_29791542_A_G_rs1611158	83	49	0.635943	0.597346	0.0133835	0.078431
ENSG00000066379.10	ZNRD1	var_29791561_A_C_rs1611159	83	49	0.635943	0.597346	0.0133835	0.078431
ENSG00000066379.10	ZNRD1	var_29791945_T_C_rs1611162	83	49	0.635943	0.597346	0.0133835	0.078431
ENSG00000066379.10	ZNRD1	var_29792575_A_G_rs2249571	83	46	0.619322	0.621138	0.746319	1
ENSG00000066379.10	ZNRD1	var_29793021_A_G_rs1736942	83	49	0.635943	0.597346	0.0133835	0.078431
ENSG00000066379.10	ZNRD1	var_29795747_G_C_rs6932888	83	30	0.626062	0.616775	0.516147	0.827183
ENSG00000066379.10	ZNRD1	var_29795751_C_T_rs6932596	83	30	0.626062	0.616775	0.516147	0.827183
ENSG00000066379.10	ZNRD1	var_29795809_C_T_rs1628628	83	46	0.626057	0.612766	0.424793	0.747108
ENSG00000066379.10	ZNRD1	var_29796126_A_AC_rs3215482	83	46	0.619834	0.620502	0.795102	1
ENSG00000066379.10	ZNRD1	var_29796152_G_C_rs1625907	83	46	0.619834	0.620502	0.795102	1
ENSG00000066379.10	ZNRD1	var_29796327_C_T_rs1130356	83	49	0.635943	0.597346	0.0133835	0.078431
ENSG00000066379.10	ZNRD1	var_29797639_C_T_rs1049033	83	53	0.636167	0.591804	0.00389815	0.0316931
ENSG00000066379.10	ZNRD1	var_29797782_T_C_rs1611627	83	46	0.626057	0.612766	0.424793	0.747108
ENSG00000066379.10	ZNRD1	var_29798419_G_A_rs915670	83	53	0.636167	0.591804	0.00389815	0.0316931
ENSG00000066379.10	ZNRD1	var_29798794_A_G_rs9380142	83	28	0.630013	0.615102	0.309574	0.622199
ENSG00000066379.10	ZNRD1	var_29798803_C_G_rs1610696	83	49	0.635943	0.597346	0.0133835	0.078431
ENSG00000066379.10	ZNRD1	var_29799116_G_T_rs1611139	83	49	0.635943	0.597346	0.0133835	0.078431
ENSG00000066379.10	ZNRD1	var_29799316_C_T_rs1611143	83	53	0.636167	0.591804	0.00389815	0.0316931
ENSG00000066379.10	ZNRD1	var_29799354_A_G_rs1611144	83	48	0.615633	0.626302	0.318893	0.634432
ENSG00000066379.10	ZNRD1	var_29799942_TA_T_rs28724925	83	27	0.630548	0.61511	0.309743	0.622199
ENSG00000066379.10	ZNRD1	var_29801324_T_C_rs1610682	83	50	0.644851	0.582678	2.65579e-05	0.000736531
ENSG00000066379.10	ZNRD1	var_29803377_C_T_rs9258508	83	19	0.652688	0.610467	0.0062037	0.0420509
ENSG00000066379.10	ZNRD1	var_29803880_A_G_rs9295821	83	27	0.630548	0.61511	0.309743	0.622199
ENSG00000066379.10	ZNRD1	var_29804165_G_A_rs9404952	83	36	0.64055	0.604492	0.0213041	0.106958
ENSG00000066379.10	ZNRD1	var_29806341_T_C_rs9258525	83	22	0.662561	0.604829	0.000265074	0.00459072
ENSG00000066379.10	ZNRD1	var_29806786_A_T_.	83	31	0.619822	0.620316	0.981224	1
ENSG00000066379.10	ZNRD1	var_29806901_C_G_rs407238	83	47	0.641633	0.59206	0.000710934	0.0100608
ENSG00000066379.10	ZNRD1	var_29809382_C_T_rs1611133	83	50	0.644851	0.582678	2.65579e-05	0.000736531
ENSG00000066379.10	ZNRD1	var_29809826_A_C_rs1476435	83	50	0.644851	0.582678	2.65579e-05	0.000736531
ENSG00000066379.10	ZNRD1	var_29811131_G_A_rs1611136	83	50	0.646922	0.579541	4.19974e-06	0.000132994
ENSG00000066379.10	ZNRD1	var_29813380_C_T_rs2517878	83	50	0.646922	0.579541	4.19974e-06	0.000132994
ENSG00000066379.10	ZNRD1	var_29814778_T_G_rs1611750	83	50	0.646922	0.579541	4.19974e-06	0.000132994
ENSG00000066379.10	ZNRD1	var_29817106_T_A_rs2523765	83	57	0.62819	0.602465	0.129293	0.35738
ENSG00000066379.10	ZNRD1	var_29818123_G_A_rs2523763	83	31	0.619822	0.620316	0.981224	1
ENSG00000066379.10	ZNRD1	var_29818159_C_T_rs4711200	83	27	0.630548	0.61511	0.309743	0.622199
ENSG00000066379.10	ZNRD1	var_29818229_C_G_rs2734987	83	31	0.619822	0.620316	0.981224	1
ENSG00000066379.10	ZNRD1	var_29820047_T_C_rs2508050	83	26	0.644847	0.608858	0.0159376	0.0882762
ENSG00000066379.10	ZNRD1	var_29820110_G_A_rs9258605	83	19	0.652688	0.610467	0.0062037	0.0420509
ENSG00000066379.10	ZNRD1	var_29820278_A_G_rs3115627	83	31	0.619822	0.620316	0.981224	1
ENSG00000066379.10	ZNRD1	var_29820503_G_A_rs9258618	83	22	0.662561	0.604829	0.000265074	0.00459072
ENSG00000066379.10	ZNRD1	var_29821268_G_A_rs3094643	83	31	0.619822	0.620316	0.981224	1
ENSG00000066379.10	ZNRD1	var_29821567_G_T_rs2734982	83	27	0.630548	0.61511	0.309743	0.622199
ENSG00000066379.10	ZNRD1	var_29822061_C_T_rs3115626	83	29	0.637477	0.610817	0.0717992	0.250015
ENSG00000066379.10	ZNRD1	var_29822139_G_A_rs2975034	83	27	0.630548	0.61511	0.309743	0.622199
ENSG00000066379.10	ZNRD1	var_29822261_G_A_rs2975033	83	27	0.630548	0.61511	0.309743	0.622199
ENSG00000066379.10	ZNRD1	var_29822413_A_C_rs2905756	83	27	0.630548	0.61511	0.309743	0.622199
ENSG00000066379.10	ZNRD1	var_29822650_A_G_rs3115625	83	29	0.637477	0.610817	0.0717992	0.250015
ENSG00000066379.10	ZNRD1	var_29822779_AAAAC_A_rs147955672	83	39	0.61723	0.622704	0.754194	1
ENSG00000066379.10	ZNRD1	var_29823571_A_T_rs3128909	83	29	0.637477	0.610817	0.0717992	0.250015
ENSG00000066379.10	ZNRD1	var_29824731_G_A_rs9258701	83	14	0.648249	0.614427	0.0359282	0.154053
ENSG00000066379.10	ZNRD1	var_29825566_A_G_rs1611680	83	31	0.619822	0.620316	0.981224	1
ENSG00000066379.10	ZNRD1	var_29826092_C_T_rs2517840	83	27	0.630548	0.61511	0.309743	0.622199
ENSG00000066379.10	ZNRD1	var_29827002_A_G_rs9258734	83	19	0.652688	0.610467	0.0062037	0.0420509
ENSG00000066379.10	ZNRD1	var_29828051_A_G_rs1611702	83	31	0.619822	0.620316	0.981224	1
ENSG00000066379.10	ZNRD1	var_29828270_T_C_rs9258741	83	22	0.667267	0.603132	4.29719e-05	0.00108172
ENSG00000066379.10	ZNRD1	var_29828276_C_T_rs9258742	83	19	0.652688	0.610467	0.0062037	0.0420509
ENSG00000066379.10	ZNRD1	var_29828467_C_T_rs1611704	83	31	0.619822	0.620316	0.981224	1
ENSG00000066379.10	ZNRD1	var_29828660_A_G_rs2523822	83	27	0.630548	0.61511	0.309743	0.622199
ENSG00000066379.10	ZNRD1	var_29829464_C_T_rs9258755	83	19	0.652688	0.610467	0.0062037	0.0420509
ENSG00000066379.10	ZNRD1	var_29829482_A_C_rs1611715	83	31	0.619822	0.620316	0.981224	1
ENSG00000066379.10	ZNRD1	var_29829986_T_C_rs3094169	83	29	0.637477	0.610817	0.0717992	0.250015
ENSG00000066379.10	ZNRD1	var_29830529_C_G_rs2517829	83	26	0.644847	0.608858	0.0159376	0.0882762
ENSG00000066379.10	ZNRD1	var_29832724_C_T_.	83	27	0.630548	0.61511	0.309743	0.622199
ENSG00000066379.10	ZNRD1	var_29832908_A_G_rs2975032	83	26	0.644847	0.608858	0.0159376	0.0882762
ENSG00000066379.10	ZNRD1	var_29833794_T_TA_rs79096800	83	29	0.644463	0.607065	0.0106209	0.0651598
ENSG00000066379.10	ZNRD1	var_29833948_C_T_rs2734973	83	29	0.644463	0.607065	0.0106209	0.0651598
ENSG00000066379.10	ZNRD1	var_29834199_T_C_rs2734972	83	27	0.630548	0.61511	0.309743	0.622199
ENSG00000066379.10	ZNRD1	var_29835026_G_A_rs2734968	83	29	0.625526	0.617235	0.576338	0.888094
ENSG00000066379.10	ZNRD1	var_29835518_T_A_rs2734967	83	29	0.625526	0.617235	0.576338	0.888094
ENSG00000066379.10	ZNRD1	var_29836524_C_A_rs9258866	83	22	0.667267	0.603132	4.29719e-05	0.00108172
ENSG00000066379.10	ZNRD1	var_29836732_G_A_rs9258869	83	22	0.667267	0.603132	4.29719e-05	0.00108172
ENSG00000066379.10	ZNRD1	var_29836968_A_G_rs9258874	83	22	0.667267	0.603132	4.29719e-05	0.00108172
ENSG00000066379.10	ZNRD1	var_29837072_G_A_rs9258876	83	22	0.667267	0.603132	4.29719e-05	0.00108172
ENSG00000066379.10	ZNRD1	var_29837138_A_C_.	83	22	0.662561	0.604829	0.000265074	0.00459072
ENSG00000066379.10	ZNRD1	var_29839268_C_T_rs886398	83	26	0.644847	0.608858	0.0159376	0.0882762
ENSG00000066379.10	ZNRD1	var_29840146_T_C_rs1611646	83	29	0.644463	0.607065	0.0106209	0.0651598
ENSG00000066379.10	ZNRD1	var_29841072_C_T_rs1611650	83	29	0.644463	0.607065	0.0106209	0.0651598
ENSG00000066379.10	ZNRD1	var_29841191_TCCG_T_.	83	26	0.644847	0.608858	0.0159376	0.0882762
ENSG00000066379.10	ZNRD1	var_29841196_T_TGGC_.	83	26	0.644847	0.608858	0.0159376	0.0882762
ENSG00000066379.10	ZNRD1	var_29841483_G_C_rs1611652	83	29	0.644463	0.607065	0.0106209	0.0651598
ENSG00000066379.10	ZNRD1	var_29841505_T_A_rs80311704	83	29	0.644463	0.607065	0.0106209	0.0651598
ENSG00000066379.10	ZNRD1	var_29841926_T_G_rs1611655	83	26	0.644847	0.608858	0.0159376	0.0882762
ENSG00000066379.10	ZNRD1	var_29841990_T_G_rs2734966	83	29	0.625526	0.617235	0.576338	0.888094
ENSG00000066379.10	ZNRD1	var_29842409_T_C_rs2523812	83	29	0.625526	0.617235	0.576338	0.888094
ENSG00000066379.10	ZNRD1	var_29842934_TC_T_rs9278382	83	22	0.662561	0.604829	0.000265074	0.00459072
ENSG00000066379.10	ZNRD1	var_29849619_G_T_rs2523809	83	29	0.644463	0.607065	0.0106209	0.0651598
ENSG00000066379.10	ZNRD1	var_29849674_T_C_rs2734960	83	27	0.630548	0.61511	0.309743	0.622199
ENSG00000066379.10	ZNRD1	var_29850183_G_A_rs2734958	83	29	0.644463	0.607065	0.0106209	0.0651598
ENSG00000066379.10	ZNRD1	var_29850274_A_G_rs2523807	83	25	0.648947	0.607712	0.00624624	0.0420958
ENSG00000066379.10	ZNRD1	var_29850335_C_T_rs2523806	83	27	0.630548	0.61511	0.309743	0.622199
ENSG00000066379.10	ZNRD1	var_29852104_TTCTC_T_rs147144172	83	19	0.66155	0.607836	0.00141268	0.0164434
ENSG00000066379.10	ZNRD1	var_29854722_A_G_rs9259204	83	19	0.66155	0.607836	0.00141268	0.0164434
ENSG00000066379.10	ZNRD1	var_29854795_G_C_rs1054175	83	27	0.630548	0.61511	0.309743	0.622199
ENSG00000066379.10	ZNRD1	var_29855978_G_T_rs7768484	83	19	0.666999	0.606218	0.000254072	0.00449277
ENSG00000066379.10	ZNRD1	var_29856151_CG_C_rs9278394	83	19	0.666999	0.606218	0.000254072	0.00449277
ENSG00000066379.10	ZNRD1	var_29856330_G_A_rs2428512	83	28	0.626617	0.61683	0.528133	0.840411
ENSG00000066379.10	ZNRD1	var_29859906_T_C_rs2517816	83	28	0.626617	0.61683	0.528133	0.840411
ENSG00000066379.10	ZNRD1	var_29860505_G_A_rs9259319	83	20	0.660767	0.607232	0.00105946	0.0134013
ENSG00000066379.10	ZNRD1	var_29861567_T_C_.	83	19	0.666999	0.606218	0.000254072	0.00449277
ENSG00000066379.10	ZNRD1	var_29862227_G_A_rs74617756	83	28	0.626617	0.61683	0.528133	0.840411
ENSG00000066379.10	ZNRD1	var_29864686_C_T_rs9259449	83	20	0.660767	0.607232	0.00105946	0.0134013
ENSG00000066379.10	ZNRD1	var_29865718_C_A_rs2517811	83	27	0.630548	0.61511	0.309743	0.622199
ENSG00000066379.10	ZNRD1	var_29865737_G_C_rs9259469	83	20	0.660767	0.607232	0.00105946	0.0134013
ENSG00000066379.10	ZNRD1	var_29866219_A_G_rs2523830	83	45	0.630226	0.608179	0.113108	0.330799
ENSG00000066379.10	ZNRD1	var_29866227_A_G_rs9259477	83	19	0.666999	0.606218	0.000254072	0.00449277
ENSG00000066379.10	ZNRD1	var_29869110_T_C_rs4123016	83	13	0.647991	0.614958	0.0470433	0.185875
ENSG00000066379.10	ZNRD1	var_29869950_C_T_rs9259529	83	19	0.666999	0.606218	0.000254072	0.00449277
ENSG00000066379.10	ZNRD1	var_29870053_G_A_rs2517883	83	33	0.623729	0.617758	0.762342	1
ENSG00000066379.10	ZNRD1	var_29870427_TG_T_rs143017739	83	18	0.66175	0.608607	0.00101138	0.0133359
ENSG00000066379.10	ZNRD1	var_29870615_A_G_rs2517876	83	27	0.630548	0.61511	0.309743	0.622199
ENSG00000066379.10	ZNRD1	var_29871036_G_A_rs9259556	83	20	0.660767	0.607232	0.00105946	0.0134013
ENSG00000066379.10	ZNRD1	var_29871484_G_A_rs9259563	83	20	0.660767	0.607232	0.00105946	0.0134013
ENSG00000066379.10	ZNRD1	var_29871671_G_A_rs2517865	83	28	0.626617	0.61683	0.528133	0.840411
ENSG00000066379.10	ZNRD1	var_29872512_T_G_rs2517831	83	28	0.626617	0.61683	0.528133	0.840411
ENSG00000066379.10	ZNRD1	var_29872774_A_G_rs2517828	83	28	0.626617	0.61683	0.528133	0.840411
ENSG00000066379.10	ZNRD1	var_29873154_C_T_rs9259572	83	20	0.660767	0.607232	0.00105946	0.0134013
ENSG00000066379.10	ZNRD1	var_29874239_G_A_rs9259602	83	19	0.666999	0.606218	0.000254072	0.00449277
ENSG00000066379.10	ZNRD1	var_29875052_A_G_rs9259621	83	16	0.649635	0.613086	0.0254995	0.124602
ENSG00000066379.10	ZNRD1	var_29875141_T_C_rs9259623	83	19	0.666999	0.606218	0.000254072	0.00449277
ENSG00000066379.10	ZNRD1	var_29875677_C_G_rs9259633	83	19	0.666999	0.606218	0.000254072	0.00449277
ENSG00000066379.10	ZNRD1	var_29877792_C_T_rs4499966	83	19	0.666999	0.606218	0.000254072	0.00449277
ENSG00000066379.10	ZNRD1	var_29878852_C_A_rs9259682	83	19	0.666999	0.606218	0.000254072	0.00449277
ENSG00000066379.10	ZNRD1	var_29881038_G_C_rs9259705	83	19	0.66155	0.607836	0.00141268	0.0164434
ENSG00000066379.10	ZNRD1	var_29882243_A_C_rs9259710	83	19	0.66155	0.607836	0.00141268	0.0164434
ENSG00000066379.10	ZNRD1	var_29883076_C_G_rs1632921	83	29	0.631027	0.61428	0.300063	0.616847
ENSG00000066379.10	ZNRD1	var_29883189_C_T_rs2394244	83	20	0.657454	0.608284	0.00312868	0.0296322
ENSG00000066379.10	ZNRD1	var_29884272_G_C_rs9259720	83	19	0.66155	0.607836	0.00141268	0.0164434
ENSG00000066379.10	ZNRD1	var_29885086_C_G_rs9259730	83	19	0.66155	0.607836	0.00141268	0.0164434
ENSG00000066379.10	ZNRD1	var_29885362_G_A_rs9259733	83	19	0.66155	0.607836	0.00141268	0.0164434
ENSG00000066379.10	ZNRD1	var_29885372_C_T_rs9259734	83	19	0.66155	0.607836	0.00141268	0.0164434
ENSG00000066379.10	ZNRD1	var_29885545_TCCAAGGGC_T_.	83	19	0.66155	0.607836	0.00141268	0.0164434
ENSG00000066379.10	ZNRD1	var_29885774_G_A_rs1611489	83	29	0.631027	0.61428	0.300063	0.616847
ENSG00000066379.10	ZNRD1	var_29886073_T_C_rs9259738	83	19	0.66155	0.607836	0.00141268	0.0164434
ENSG00000066379.10	ZNRD1	var_29886216_T_G_rs1632915	83	32	0.622604	0.618581	0.862584	1
ENSG00000066379.10	ZNRD1	var_29886365_T_C_rs9259740	83	24	0.641683	0.611365	0.0507468	0.193224
ENSG00000066379.10	ZNRD1	var_29886436_T_C_rs9259741	83	24	0.641683	0.611365	0.0507468	0.193224
ENSG00000066379.10	ZNRD1	var_29886714_A_G_rs2734919	83	34	0.643634	0.603824	0.0110768	0.0671965
ENSG00000066379.10	ZNRD1	var_29887114_G_A_rs2734918	80	27	0.639915	0.6115	0.11245	0.329385
ENSG00000066379.10	ZNRD1	var_29887292_G_A_rs9259748	83	19	0.66155	0.607836	0.00141268	0.0164434
ENSG00000066379.10	ZNRD1	var_29887684_G_A_rs9259750	83	19	0.66155	0.607836	0.00141268	0.0164434
ENSG00000066379.10	ZNRD1	var_29887756_AAAG_A_rs369515369	79	18	0.655998	0.613794	0.0103015	0.0635779
ENSG00000066379.10	ZNRD1	var_29887830_C_T_rs9259751	83	19	0.66155	0.607836	0.00141268	0.0164434
ENSG00000066379.10	ZNRD1	var_29887849_A_T_rs2524015	83	19	0.66155	0.607836	0.00141268	0.0164434
ENSG00000066379.10	ZNRD1	var_29888046_G_A_rs9259753	83	19	0.66155	0.607836	0.00141268	0.0164434
ENSG00000066379.10	ZNRD1	var_29888157_T_A_rs9259754	83	19	0.66155	0.607836	0.00141268	0.0164434
ENSG00000066379.10	ZNRD1	var_29888524_G_C_rs9259757	83	19	0.66155	0.607836	0.00141268	0.0164434
ENSG00000066379.10	ZNRD1	var_29889348_GT_G_rs139111824	83	19	0.66155	0.607836	0.00141268	0.0164434
ENSG00000066379.10	ZNRD1	var_29889514_T_C_rs2571426	83	38	0.637028	0.605864	0.0528896	0.200004
ENSG00000066379.10	ZNRD1	var_29889622_A_G_rs2905778	83	35	0.645394	0.601711	0.00457974	0.0329357
ENSG00000066379.10	ZNRD1	var_29889630_A_G_rs2471870	83	36	0.640548	0.604494	0.023519	0.11683
ENSG00000066379.10	ZNRD1	var_29889668_A_G_rs9259768	83	19	0.66155	0.607836	0.00141268	0.0164434
ENSG00000066379.10	ZNRD1	var_29889779_A_G_rs2844811	83	35	0.645394	0.601711	0.00457974	0.0329357
ENSG00000066379.10	ZNRD1	var_29889832_G_T_rs9259773	83	19	0.66155	0.607836	0.00141268	0.0164434
ENSG00000066379.10	ZNRD1	var_29889842_G_A_rs9259774	83	19	0.66155	0.607836	0.00141268	0.0164434
ENSG00000066379.10	ZNRD1	var_29890442_C_T_rs9259781	83	19	0.66155	0.607836	0.00141268	0.0164434
ENSG00000066379.10	ZNRD1	var_29890448_T_C_rs1611392	83	26	0.629862	0.615694	0.395734	0.724272
ENSG00000066379.10	ZNRD1	var_29890557_T_TCTAA_.	83	26	0.629862	0.615694	0.395734	0.724272
ENSG00000066379.10	ZNRD1	var_29890566_G_A_rs2905777	83	36	0.640548	0.604494	0.023519	0.11683
ENSG00000066379.10	ZNRD1	var_29890615_C_A_rs2975016	83	36	0.640548	0.604494	0.023519	0.11683
ENSG00000066379.10	ZNRD1	var_29890620_A_G_rs1611397	83	26	0.629862	0.615694	0.395734	0.724272
ENSG00000066379.10	ZNRD1	var_29890701_C_G_rs9259784	83	26	0.629862	0.615694	0.395734	0.724272
ENSG00000066379.10	ZNRD1	var_29890739_C_T_rs1611398	83	26	0.629862	0.615694	0.395734	0.724272
ENSG00000066379.10	ZNRD1	var_29890809_C_G_rs2437067	83	36	0.640548	0.604494	0.023519	0.11683
ENSG00000066379.10	ZNRD1	var_29890869_G_T_rs2471868	83	36	0.640548	0.604494	0.023519	0.11683
ENSG00000066379.10	ZNRD1	var_29890918_C_T_rs1611400	83	26	0.629862	0.615694	0.395734	0.724272
ENSG00000066379.10	ZNRD1	var_29891278_G_C_rs9647649	83	40	0.634687	0.606592	0.0809173	0.263449
ENSG00000066379.10	ZNRD1	var_29891292_TC_T_rs68042301	83	40	0.634687	0.606592	0.0809173	0.263449
ENSG00000066379.10	ZNRD1	var_29891455_T_C_rs3129028	83	36	0.640548	0.604494	0.023519	0.11683
ENSG00000066379.10	ZNRD1	var_29891483_A_G_rs3129027	83	36	0.640548	0.604494	0.023519	0.11683
ENSG00000066379.10	ZNRD1	var_29891493_G_A_rs3129026	83	36	0.640548	0.604494	0.023519	0.11683
ENSG00000066379.10	ZNRD1	var_29891617_G_A_rs3129025	83	36	0.640548	0.604494	0.023519	0.11683
ENSG00000066379.10	ZNRD1	var_29891825_C_T_rs2975014	83	38	0.641958	0.601701	0.00983962	0.0610049
ENSG00000066379.10	ZNRD1	var_29891826_A_G_rs1611415	83	27	0.630667	0.615052	0.328629	0.646699
ENSG00000066379.10	ZNRD1	var_29891837_T_C_rs9259797	83	20	0.661052	0.607141	0.00102022	0.0133359
ENSG00000066379.10	ZNRD1	var_29891849_C_T_rs9259798	83	20	0.661052	0.607141	0.00102022	0.0133359
ENSG00000066379.10	ZNRD1	var_29892104_G_A_rs2517785	83	36	0.640548	0.604494	0.023519	0.11683
ENSG00000066379.10	ZNRD1	var_29892196_A_T_rs2517784	83	36	0.640548	0.604494	0.023519	0.11683
ENSG00000066379.10	ZNRD1	var_29892262_G_A_rs9259803	83	19	0.66155	0.607836	0.00141268	0.0164434
ENSG00000066379.10	ZNRD1	var_29892319_G_A_rs9259804	83	19	0.66155	0.607836	0.00141268	0.0164434
ENSG00000066379.10	ZNRD1	var_29892436_C_G_rs9259806	81	19	0.66155	0.609666	0.00205745	0.0221786
ENSG00000066379.10	ZNRD1	var_29892475_T_C_rs9259807	83	19	0.66155	0.607836	0.00141268	0.0164434
ENSG00000066379.10	ZNRD1	var_29892571_A_AAATT_.	83	26	0.626816	0.617083	0.599397	0.904458
ENSG00000066379.10	ZNRD1	var_29892615_C_T_rs2517782	83	34	0.645024	0.60286	0.00748566	0.0480481
ENSG00000066379.10	ZNRD1	var_29892709_A_G_rs2517781	83	34	0.645024	0.60286	0.00748566	0.0480481
ENSG00000066379.10	ZNRD1	var_29893168_C_T_rs9259813	83	19	0.66155	0.607836	0.00141268	0.0164434
ENSG00000066379.10	ZNRD1	var_29893373_A_G_rs9259814	83	19	0.66155	0.607836	0.00141268	0.0164434
ENSG00000066379.10	ZNRD1	var_29893498_G_C_rs9259818	83	19	0.66155	0.607836	0.00141268	0.0164434
ENSG00000066379.10	ZNRD1	var_29893501_A_T_rs1611432	83	26	0.626816	0.617083	0.599397	0.904458
ENSG00000066379.10	ZNRD1	var_29893560_A_G_rs13214629	83	32	0.628531	0.614862	0.445753	0.76767
ENSG00000066379.10	ZNRD1	var_29893886_C_T_rs9259822	83	19	0.66155	0.607836	0.00141268	0.0164434
ENSG00000066379.10	ZNRD1	var_29894205_T_C_rs2517772	83	32	0.628531	0.614862	0.445753	0.76767
ENSG00000066379.10	ZNRD1	var_29894226_G_T_rs2074487	83	32	0.628531	0.614862	0.445753	0.76767
ENSG00000066379.10	ZNRD1	var_29894410_C_T_rs2904763	83	34	0.635626	0.609381	0.0893481	0.283311
ENSG00000066379.10	ZNRD1	var_29894569_T_C_rs9259824	83	19	0.66155	0.607836	0.00141268	0.0164434
ENSG00000066379.10	ZNRD1	var_29894580_T_G_rs2571425	83	26	0.629862	0.615694	0.395734	0.724272
ENSG00000066379.10	ZNRD1	var_29894798_T_C_rs2517767	83	32	0.628531	0.614862	0.445753	0.76767
ENSG00000066379.10	ZNRD1	var_29894853_C_T_rs9259825	83	19	0.657382	0.609073	0.00459168	0.033014
ENSG00000066379.10	ZNRD1	var_29895228_G_T_rs9259831	83	19	0.66155	0.607836	0.00141268	0.0164434
ENSG00000066379.10	ZNRD1	var_29895816_A_T_rs2517760	83	26	0.626816	0.617083	0.599397	0.904458
ENSG00000066379.10	ZNRD1	var_29895913_G_A_rs13201148	83	32	0.628531	0.614862	0.445753	0.76767
ENSG00000066379.10	ZNRD1	var_29895944_G_A_rs13204255	83	32	0.628531	0.614862	0.445753	0.76767
ENSG00000066379.10	ZNRD1	var_29895958_C_A_rs9259841	83	19	0.66155	0.607836	0.00141268	0.0164434
ENSG00000066379.10	ZNRD1	var_29896045_CAG_C_.	83	32	0.628531	0.614862	0.445753	0.76767
ENSG00000066379.10	ZNRD1	var_29896054_C_A_rs9259844	83	26	0.626816	0.617083	0.599397	0.904458
ENSG00000066379.10	ZNRD1	var_29896272_G_A_rs9259851	83	19	0.66155	0.607836	0.00141268	0.0164434
ENSG00000066379.10	ZNRD1	var_29896466_C_T_rs9259853	83	19	0.66155	0.607836	0.00141268	0.0164434
ENSG00000066379.10	ZNRD1	var_29896481_C_A_rs9259854	83	19	0.66155	0.607836	0.00141268	0.0164434
ENSG00000066379.10	ZNRD1	var_29896680_A_G_rs2517754	83	35	0.642771	0.603624	0.0127328	0.0754873
ENSG00000066379.10	ZNRD1	var_29896847_T_TGA_rs10626879	83	26	0.626816	0.617083	0.599397	0.904458
ENSG00000066379.10	ZNRD1	var_29897259_T_A_rs2517749	83	32	0.628531	0.614862	0.445753	0.76767
ENSG00000066379.10	ZNRD1	var_29897350_C_T_rs2517748	83	32	0.628531	0.614862	0.445753	0.76767
ENSG00000066379.10	ZNRD1	var_29897694_G_A_rs2517745	83	32	0.628531	0.614862	0.445753	0.76767
ENSG00000066379.10	ZNRD1	var_29897710_G_A_rs9259863	83	19	0.66155	0.607836	0.00141268	0.0164434
ENSG00000066379.10	ZNRD1	var_29897776_C_A_rs9259866	83	19	0.66155	0.607836	0.00141268	0.0164434
ENSG00000066379.10	ZNRD1	var_29897802_G_A_rs9259867	83	19	0.66155	0.607836	0.00141268	0.0164434
ENSG00000066379.10	ZNRD1	var_29898024_C_T_rs9259873	83	19	0.66155	0.607836	0.00141268	0.0164434
ENSG00000066379.10	ZNRD1	var_29898108_A_T_rs2975010	83	32	0.628531	0.614862	0.445753	0.76767
ENSG00000066379.10	ZNRD1	var_29898116_C_T_rs2975009	83	36	0.633182	0.610136	0.217782	0.514506
ENSG00000066379.10	ZNRD1	var_29898226_G_A_rs2905773	83	32	0.628531	0.614862	0.445753	0.76767
ENSG00000066379.10	ZNRD1	var_29899089_AG_A_rs9278447	83	19	0.66155	0.607836	0.00141268	0.0164434
ENSG00000066379.10	ZNRD1	var_29899176_G_A_rs9259905	83	19	0.66155	0.607836	0.00141268	0.0164434
ENSG00000066379.10	ZNRD1	var_29899212_G_T_rs9259908	83	19	0.66155	0.607836	0.00141268	0.0164434
ENSG00000066379.10	ZNRD1	var_29899389_C_T_rs9259910	83	19	0.66155	0.607836	0.00141268	0.0164434
ENSG00000066379.10	ZNRD1	var_29899483_C_T_rs9259912	83	19	0.66155	0.607836	0.00141268	0.0164434
ENSG00000066379.10	ZNRD1	var_29901917_A_G_rs9259920	83	19	0.66155	0.607836	0.00141268	0.0164434
ENSG00000066379.10	ZNRD1	var_29902242_T_C_rs9259926	83	19	0.66155	0.607836	0.00141268	0.0164434
ENSG00000066379.10	ZNRD1	var_29902327_G_T_rs2975007	83	34	0.627289	0.615165	0.56474	0.876165
ENSG00000066379.10	ZNRD1	var_29902435_G_C_rs9259929	83	19	0.66155	0.607836	0.00141268	0.0164434
ENSG00000066379.10	ZNRD1	var_29902714_T_G_rs7770901	83	31	0.624242	0.617682	0.696037	0.996777
ENSG00000066379.10	ZNRD1	var_29902774_A_G_rs28749095	83	30	0.621233	0.619509	0.935784	1
ENSG00000066379.10	ZNRD1	var_29902779_G_A_rs9259933	83	19	0.66155	0.607836	0.00141268	0.0164434
ENSG00000066379.10	ZNRD1	var_29903013_CT_C_rs11312290	83	31	0.624242	0.617682	0.696037	0.996777
ENSG00000066379.10	ZNRD1	var_29903095_ACT_A_rs9278450	83	20	0.663657	0.606314	0.000549768	0.00846722
ENSG00000066379.10	ZNRD1	var_29903096_C_*_.	83	20	0.663657	0.606314	0.000549768	0.00846722
ENSG00000066379.10	ZNRD1	var_29903218_G_A_rs9259937	83	19	0.66155	0.607836	0.00141268	0.0164434
ENSG00000066379.10	ZNRD1	var_29903306_A_G_rs2437062	83	35	0.620658	0.619748	0.952473	1
ENSG00000066379.10	ZNRD1	var_29903404_C_T_rs3094678	83	42	0.615066	0.625321	0.438133	0.759519
ENSG00000066379.10	ZNRD1	var_29904769_A_G_rs2523999	83	40	0.624606	0.61597	0.810164	1
ENSG00000066379.10	ZNRD1	var_29905380_G_C_rs28749112	83	31	0.624242	0.617682	0.696037	0.996777
ENSG00000066379.10	ZNRD1	var_29905451_C_A_rs28749113	83	31	0.624242	0.617682	0.696037	0.996777
ENSG00000066379.10	ZNRD1	var_29905452_A_G_rs28749114	83	31	0.624242	0.617682	0.696037	0.996777
ENSG00000066379.10	ZNRD1	var_29905628_C_G_rs13190729	83	31	0.624242	0.617682	0.696037	0.996777
ENSG00000066379.10	ZNRD1	var_29905629_G_A_rs1632892	83	45	0.629617	0.6089	0.245308	0.548847
ENSG00000066379.10	ZNRD1	var_29905671_T_TC_rs145549063	83	35	0.618496	0.621324	0.772672	1
ENSG00000066379.10	ZNRD1	var_29906356_AAT_A_rs113403777	83	22	0.662561	0.604829	0.000265074	0.00459072
ENSG00000066379.10	ZNRD1	var_29906597_G_A_rs9260017	83	22	0.662561	0.604829	0.000265074	0.00459072
ENSG00000066379.10	ZNRD1	var_29906681_C_T_rs9260018	83	22	0.662561	0.604829	0.000265074	0.00459072
ENSG00000066379.10	ZNRD1	var_29906724_A_G_rs2904760	83	33	0.622911	0.618297	0.755259	1
ENSG00000066379.10	ZNRD1	var_29906783_C_T_rs9368614	83	33	0.622911	0.618297	0.755259	1
ENSG00000066379.10	ZNRD1	var_29906813_G_T_rs9368615	83	33	0.622911	0.618297	0.755259	1
ENSG00000066379.10	ZNRD1	var_29906981_G_C_rs13198419	83	33	0.622911	0.618297	0.755259	1
ENSG00000066379.10	ZNRD1	var_29907030_C_T_rs9260024	83	22	0.662561	0.604829	0.000265074	0.00459072
ENSG00000066379.10	ZNRD1	var_29907123_C_T_rs28749115	83	33	0.622911	0.618297	0.755259	1
ENSG00000066379.10	ZNRD1	var_29907159_A_G_rs28749117	83	33	0.622911	0.618297	0.755259	1
ENSG00000066379.10	ZNRD1	var_29907164_G_T_rs28749118	83	33	0.622911	0.618297	0.755259	1
ENSG00000066379.10	ZNRD1	var_29907201_C_T_rs28749119	83	33	0.622911	0.618297	0.755259	1
ENSG00000066379.10	ZNRD1	var_29907313_G_A_rs28749120	83	33	0.622911	0.618297	0.755259	1
ENSG00000066379.10	ZNRD1	var_29907451_C_T_rs28749121	83	33	0.622911	0.618297	0.755259	1
ENSG00000066379.10	ZNRD1	var_29907466_T_C_rs28749122	83	33	0.622911	0.618297	0.755259	1
ENSG00000066379.10	ZNRD1	var_29907467_C_T_rs28749123	83	33	0.622911	0.618297	0.755259	1
ENSG00000066379.10	ZNRD1	var_29907510_C_G_rs9260037	83	22	0.662561	0.604829	0.000265074	0.00459072
ENSG00000066379.10	ZNRD1	var_29908006_G_A_rs9260045	83	22	0.662561	0.604829	0.000265074	0.00459072
ENSG00000066379.10	ZNRD1	var_29908093_G_A_rs28749133	83	33	0.622911	0.618297	0.755259	1
ENSG00000066379.10	ZNRD1	var_29908108_G_T_rs9260051	83	22	0.662561	0.604829	0.000265074	0.00459072
ENSG00000066379.10	ZNRD1	var_29908156_G_A_rs9260053	83	22	0.662561	0.604829	0.000265074	0.00459072
ENSG00000066379.10	ZNRD1	var_29908158_C_T_rs28749134	83	33	0.622911	0.618297	0.755259	1
ENSG00000066379.10	ZNRD1	var_29908179_C_T_rs28749135	83	33	0.622911	0.618297	0.755259	1
ENSG00000066379.10	ZNRD1	var_29908308_C_T_rs28749137	83	31	0.625221	0.617098	0.601343	0.906703
ENSG00000066379.10	ZNRD1	var_29908469_T_C_rs12202296	83	33	0.622911	0.618297	0.755259	1
ENSG00000066379.10	ZNRD1	var_29910105_G_A_rs9260116	83	22	0.662561	0.604829	0.000265074	0.00459072
ENSG00000066379.10	ZNRD1	var_29912968_C_G_rs3823339	83	22	0.662561	0.604829	0.000265074	0.00459072
ENSG00000066379.10	ZNRD1	var_29913515_C_T_rs112525507	83	28	0.64346	0.608256	0.0150184	0.084285
ENSG00000066379.10	ZNRD1	var_29913881_T_C_rs9404954	83	31	0.627022	0.616024	0.459914	0.783545
ENSG00000066379.10	ZNRD1	var_29914057_C_G_rs9391669	83	43	0.616897	0.62361	0.522519	0.835449
ENSG00000066379.10	ZNRD1	var_29916467_A_G_rs9260303	83	28	0.64346	0.608256	0.0150184	0.084285
ENSG00000066379.10	ZNRD1	var_29916681_G_A_rs28749158	83	32	0.62537	0.616845	0.539996	0.846434
ENSG00000066379.10	ZNRD1	var_29916686_A_G_rs13214982	83	32	0.62537	0.616845	0.539996	0.846434
ENSG00000066379.10	ZNRD1	var_29917373_T_TGCA_.	83	28	0.631276	0.614458	0.278571	0.587746
ENSG00000066379.10	ZNRD1	var_29917439_T_C_rs2517715	83	28	0.631276	0.614458	0.278571	0.587746
ENSG00000066379.10	ZNRD1	var_29917701_G_A_rs9260366	83	22	0.662561	0.604829	0.000265074	0.00459072
ENSG00000066379.10	ZNRD1	var_29917800_C_A_rs2735093	83	28	0.631276	0.614458	0.278571	0.587746
ENSG00000066379.10	ZNRD1	var_29918173_T_C_rs2517712	83	29	0.629549	0.615075	0.356693	0.675229
ENSG00000066379.10	ZNRD1	var_29918315_A_T_rs9260391	83	19	0.652688	0.610467	0.0062037	0.0420509
ENSG00000066379.10	ZNRD1	var_29919433_C_T_rs2517708	83	28	0.631276	0.614458	0.278571	0.587746
ENSG00000066379.10	ZNRD1	var_29920400_CCT_C_rs28993377	83	28	0.631276	0.614458	0.278571	0.587746
ENSG00000066379.10	ZNRD1	var_29920566_T_C_rs9260497	83	22	0.662561	0.604829	0.000265074	0.00459072
ENSG00000066379.10	ZNRD1	var_29920905_ACTAG_A_rs138369692	83	21	0.668285	0.603822	5.89229e-05	0.00132274
ENSG00000066379.10	ZNRD1	var_29921034_T_C_rs28749167	83	22	0.642086	0.612214	0.0877204	0.28002
ENSG00000066379.10	ZNRD1	var_29921227_C_G_rs28780068	83	17	0.658846	0.61016	0.00870369	0.0547559
ENSG00000066379.10	ZNRD1	var_29921484_C_G_.	81	20	0.649995	0.611694	0.0340683	0.148713
ENSG00000066379.10	ZNRD1	var_29921700_C_T_rs2517703	83	22	0.642086	0.612214	0.0877204	0.28002
ENSG00000066379.10	ZNRD1	var_29921863_T_C_rs13192355	83	22	0.642086	0.612214	0.0877204	0.28002
ENSG00000066379.10	ZNRD1	var_29922090_A_C_rs9260569	83	21	0.668285	0.603822	5.89229e-05	0.00132274
ENSG00000066379.10	ZNRD1	var_29922740_A_G_rs16896742	83	44	0.61785	0.622707	0.627198	0.939235
ENSG00000066379.10	ZNRD1	var_29922754_C_T_rs9260603	83	46	0.617616	0.62326	0.457307	0.77965
ENSG00000066379.10	ZNRD1	var_29923413_G_A_rs9260638	83	22	0.662561	0.604829	0.000265074	0.00459072
ENSG00000066379.10	ZNRD1	var_29923581_A_G_rs9260642	83	22	0.662561	0.604829	0.000265074	0.00459072
ENSG00000066379.10	ZNRD1	var_29924833_T_A_rs9260671	83	28	0.637387	0.611347	0.0787925	0.257937
ENSG00000066379.10	ZNRD1	var_29924996_C_T_rs9260672	83	27	0.649185	0.606124	0.00338265	0.0316931
ENSG00000066379.10	ZNRD1	var_29925127_G_A_rs2844809	83	28	0.633665	0.613242	0.169915	0.435169
ENSG00000066379.10	ZNRD1	var_29925221_C_CA_rs9280818	83	42	0.63246	0.607503	0.112288	0.329032
ENSG00000066379.10	ZNRD1	var_29925713_T_TG_.	83	41	0.634616	0.605993	0.0719137	0.250386
ENSG00000066379.10	ZNRD1	var_29925972_A_T_rs2517701	83	28	0.633665	0.613242	0.169915	0.435169
ENSG00000066379.10	ZNRD1	var_29926300_AGGGACAGTACCCAGG_A_rs11267511	83	25	0.63784	0.612499	0.0944252	0.296715
ENSG00000066379.10	ZNRD1	var_29926597_T_C_rs1632994	83	43	0.638298	0.600603	0.0087765	0.0551482
ENSG00000066379.10	ZNRD1	var_29927534_A_C_rs9260693	83	22	0.662561	0.604829	0.000265074	0.00459072
ENSG00000066379.10	ZNRD1	var_29927611_T_C_rs2517696	83	43	0.638298	0.600603	0.0087765	0.0551482
ENSG00000066379.10	ZNRD1	var_29928137_T_C_rs441808	83	43	0.638298	0.600603	0.0087765	0.0551482
ENSG00000066379.10	ZNRD1	var_29928270_C_G_rs437464	83	38	0.638299	0.604791	0.0338497	0.148713
ENSG00000066379.10	ZNRD1	var_29928407_A_G_rs437289	83	41	0.6419	0.598882	0.00263428	0.0263021
ENSG00000066379.10	ZNRD1	var_29928487_T_C_rs2508035	83	23	0.644222	0.610897	0.0330439	0.146645
ENSG00000066379.10	ZNRD1	var_29928575_T_C_rs378337	83	38	0.638299	0.604791	0.0338497	0.148713
ENSG00000066379.10	ZNRD1	var_29928826_C_T_rs2517692	83	46	0.635997	0.600408	0.0137045	0.0795056
ENSG00000066379.10	ZNRD1	var_29929055_G_T_rs2517691	83	46	0.633348	0.603701	0.0419916	0.17044
ENSG00000066379.10	ZNRD1	var_29929073_T_C_rs2517690	83	40	0.63523	0.606087	0.0621308	0.225417
ENSG00000066379.10	ZNRD1	var_29929253_C_T_rs2517689	83	43	0.638867	0.599992	0.00742368	0.04776
ENSG00000066379.10	ZNRD1	var_29930293_ATTGC_A_rs142620861	83	43	0.638298	0.600603	0.0087765	0.0551482
ENSG00000066379.10	ZNRD1	var_29930451_T_C_rs2844807	83	41	0.6419	0.598882	0.00263428	0.0263021
ENSG00000066379.10	ZNRD1	var_29930466_A_G_rs2523934	83	43	0.638298	0.600603	0.0087765	0.0551482
ENSG00000066379.10	ZNRD1	var_29931066_T_C_rs2517684	83	38	0.636215	0.60655	0.0694763	0.243184
ENSG00000066379.10	ZNRD1	var_29931376_C_T_rs9260717	83	22	0.662561	0.604829	0.000265074	0.00459072
ENSG00000066379.10	ZNRD1	var_29931390_T_G_rs9260718	83	22	0.662561	0.604829	0.000265074	0.00459072
ENSG00000066379.10	ZNRD1	var_29931419_G_A_rs9260720	83	22	0.662561	0.604829	0.000265074	0.00459072
ENSG00000066379.10	ZNRD1	var_29931477_GCAATCCCA_G_rs142710293	83	38	0.638299	0.604791	0.0338497	0.148713
ENSG00000066379.10	ZNRD1	var_29931607_C_T_rs9260721	83	41	0.6419	0.598882	0.00263428	0.0263021
ENSG00000066379.10	ZNRD1	var_29931799_A_G_rs4628142	83	38	0.638299	0.604791	0.0338497	0.148713
ENSG00000066379.10	ZNRD1	var_29931905_G_C_rs2517683	83	40	0.638004	0.603506	0.0174745	0.0939133
ENSG00000066379.10	ZNRD1	var_29931940_A_G_rs2252960	83	37	0.63399	0.608985	0.132319	0.363027
ENSG00000066379.10	ZNRD1	var_29932230_C_T_rs9260729	83	24	0.627948	0.616952	0.337443	0.652711
ENSG00000066379.10	ZNRD1	var_29932330_T_C_rs2517681	83	38	0.636215	0.60655	0.0694763	0.243184
ENSG00000066379.10	ZNRD1	var_29932380_A_T_rs2571402	83	38	0.638299	0.604791	0.0338497	0.148713
ENSG00000066379.10	ZNRD1	var_29932433_G_A_rs9260733	83	22	0.662561	0.604829	0.000265074	0.00459072
ENSG00000066379.10	ZNRD1	var_29932738_G_C_rs9393984	83	23	0.644222	0.610897	0.0330439	0.146645
ENSG00000066379.10	ZNRD1	var_29932809_C_T_rs9260736	83	22	0.662561	0.604829	0.000265074	0.00459072
ENSG00000066379.10	ZNRD1	var_29932865_G_T_rs9357088	83	23	0.644222	0.610897	0.0330439	0.146645
ENSG00000066379.10	ZNRD1	var_29932897_G_A_rs3903160	83	25	0.63784	0.612499	0.0944252	0.296715
ENSG00000066379.10	ZNRD1	var_29932914_A_AAC_rs144845647	83	38	0.638299	0.604791	0.0338497	0.148713
ENSG00000066379.10	ZNRD1	var_29932916_T_G_.	83	38	0.638299	0.604791	0.0338497	0.148713
ENSG00000066379.10	ZNRD1	var_29933225_C_T_rs2517678	83	43	0.637741	0.601202	0.0118303	0.0714395
ENSG00000066379.10	ZNRD1	var_29933236_T_C_rs9260740	83	27	0.641054	0.610044	0.0388718	0.159833
ENSG00000066379.10	ZNRD1	var_29933333_TTTG_T_rs143246277	83	43	0.63999	0.598785	0.00644107	0.0433136
ENSG00000066379.10	ZNRD1	var_29933439_C_T_rs2844806	83	39	0.625037	0.615784	0.659755	0.966106
ENSG00000066379.10	ZNRD1	var_29933945_A_C_.	81	22	0.646125	0.611553	0.0332603	0.146645
ENSG00000066379.10	ZNRD1	var_29933947_A_C_.	83	22	0.646125	0.610757	0.0268904	0.130225
ENSG00000066379.10	ZNRD1	var_29933954_A_G_rs369678743	83	21	0.660051	0.606611	0.000817806	0.0114068
ENSG00000066379.10	ZNRD1	var_29933964_G_C_rs7769998	83	26	0.635799	0.612986	0.110614	0.326811
ENSG00000066379.10	ZNRD1	var_29935107_C_T_rs9260756	83	27	0.638742	0.611159	0.0561308	0.207072
ENSG00000066379.10	ZNRD1	var_29935372_C_T_rs9260759	83	27	0.638742	0.611159	0.0561308	0.207072
ENSG00000066379.10	ZNRD1	var_29935576_G_A_rs4538750	83	25	0.63784	0.612499	0.0944252	0.296715
ENSG00000066379.10	ZNRD1	var_29935590_C_T_rs4391295	83	25	0.63784	0.612499	0.0944252	0.296715
ENSG00000066379.10	ZNRD1	var_29936307_A_T_rs4959037	83	25	0.63784	0.612499	0.0944252	0.296715
ENSG00000066379.10	ZNRD1	var_29936404_T_C_rs6927487	83	26	0.634854	0.613416	0.150335	0.394721
ENSG00000066379.10	ZNRD1	var_29936630_T_TATAC_.	83	18	0.649854	0.611901	0.013948	0.0807752
ENSG00000066379.10	ZNRD1	var_29936664_TATATATACACACAC_T_.	83	23	0.644222	0.610897	0.0330439	0.146645
ENSG00000066379.10	ZNRD1	var_29936700_CACACAT_C_rs199969293	83	23	0.644222	0.610897	0.0330439	0.146645
ENSG00000066379.10	ZNRD1	var_29936794_T_TC_rs41267238	83	23	0.644222	0.610897	0.0330439	0.146645
ENSG00000066379.10	ZNRD1	var_29937104_C_T_rs12193110	83	25	0.63784	0.612499	0.0944252	0.296715
ENSG00000066379.10	ZNRD1	var_29937148_T_C_.	83	25	0.63784	0.612499	0.0944252	0.296715
ENSG00000066379.10	ZNRD1	var_29937149_G_T_.	83	25	0.63784	0.612499	0.0944252	0.296715
ENSG00000066379.10	ZNRD1	var_29937304_A_G_rs9260768	83	22	0.662561	0.604829	0.000265074	0.00459072
ENSG00000066379.10	ZNRD1	var_29937493_G_C_rs4713274	83	23	0.644222	0.610897	0.0330439	0.146645
ENSG00000066379.10	ZNRD1	var_29937541_G_A_rs11752303	83	23	0.644222	0.610897	0.0330439	0.146645
ENSG00000066379.10	ZNRD1	var_29937562_TGAA_T_rs71830922	83	25	0.63784	0.612499	0.0944252	0.296715
ENSG00000066379.10	ZNRD1	var_29937580_A_C_rs4713275	83	23	0.644222	0.610897	0.0330439	0.146645
ENSG00000066379.10	ZNRD1	var_29937784_T_C_rs2523972	83	36	0.634292	0.609286	0.153798	0.401481
ENSG00000066379.10	ZNRD1	var_29937924_T_C_rs1061535	83	32	0.628826	0.614676	0.314525	0.627294
ENSG00000066379.10	ZNRD1	var_29938507_C_T_rs12195207	83	25	0.636809	0.612944	0.115662	0.335924
ENSG00000066379.10	ZNRD1	var_29941431_G_A_rs9295825	83	23	0.641099	0.612095	0.0725275	0.251104
ENSG00000066379.10	ZNRD1	var_29941769_G_A_rs437941	83	39	0.62944	0.611882	0.34221	0.655539
ENSG00000066379.10	ZNRD1	var_29941786_TAAAC_T_rs145169328	83	23	0.661234	0.604376	0.000208416	0.0037348
ENSG00000066379.10	ZNRD1	var_29941829_A_T_rs9366750	83	23	0.641099	0.612095	0.0725275	0.251104
ENSG00000066379.10	ZNRD1	var_29941943_C_T_rs2523946	83	43	0.624844	0.615066	0.666707	0.970679
ENSG00000066379.10	ZNRD1	var_29942126_T_G_rs2844804	83	39	0.62944	0.611882	0.34221	0.655539
ENSG00000066379.10	ZNRD1	var_29942324_T_C_rs2523945	83	43	0.624844	0.615066	0.666707	0.970679
ENSG00000066379.10	ZNRD1	var_29942401_C_G_rs9260823	83	23	0.661234	0.604376	0.000208416	0.0037348
ENSG00000066379.10	ZNRD1	var_29942439_G_A_rs9260824	83	23	0.661234	0.604376	0.000208416	0.0037348
ENSG00000066379.10	ZNRD1	var_29942491_T_A_rs9260826	83	23	0.661234	0.604376	0.000208416	0.0037348
ENSG00000066379.10	ZNRD1	var_29942497_C_T_rs393282	83	43	0.624844	0.615066	0.666707	0.970679
ENSG00000066379.10	ZNRD1	var_29942539_G_T_.	83	23	0.641099	0.612095	0.0725275	0.251104
ENSG00000066379.10	ZNRD1	var_29942678_G_A_rs9260828	83	23	0.661234	0.604376	0.000208416	0.0037348
ENSG00000066379.10	ZNRD1	var_29942706_C_CCTGCGGTGGT_.	83	43	0.624844	0.615066	0.666707	0.970679
ENSG00000066379.10	ZNRD1	var_29942866_T_C_rs2232239	83	23	0.661234	0.604376	0.000208416	0.0037348
ENSG00000066379.10	ZNRD1	var_29942979_G_C_rs9260830	83	23	0.661234	0.604376	0.000208416	0.0037348
ENSG00000066379.10	ZNRD1	var_29943178_A_G_rs6903753	83	27	0.632052	0.614384	0.245413	0.548847
ENSG00000066379.10	ZNRD1	var_29943469_C_A_rs9260833	83	19	0.653956	0.61009	0.00580684	0.0396581
ENSG00000066379.10	ZNRD1	var_29943475_C_A_rs9260834	83	19	0.653956	0.61009	0.00580684	0.0396581
ENSG00000066379.10	ZNRD1	var_29943528_G_A_rs9260836	83	23	0.661234	0.604376	0.000208416	0.0037348
ENSG00000066379.10	ZNRD1	var_29943581_C_A_rs9260837	83	23	0.661234	0.604376	0.000208416	0.0037348
ENSG00000066379.10	ZNRD1	var_29943656_G_T_rs2394250	83	39	0.63889	0.603505	0.0182403	0.0967038
ENSG00000066379.10	ZNRD1	var_29943693_A_AT_.	83	26	0.644569	0.608985	0.0177368	0.094626
ENSG00000066379.10	ZNRD1	var_29943702_C_T_.	83	59	0.620913	0.618212	0.923981	1
ENSG00000066379.10	ZNRD1	var_29943715_C_T_rs3823363	83	46	0.626396	0.612344	0.368784	0.693198
ENSG00000066379.10	ZNRD1	var_29943866_G_A_rs2245950	83	45	0.639137	0.597626	0.00468686	0.0336322
ENSG00000066379.10	ZNRD1	var_29943916_A_T_rs3823369	83	28	0.629486	0.61537	0.347698	0.662818
ENSG00000066379.10	ZNRD1	var_29943947_G_A_rs2245958	83	50	0.631842	0.602389	0.054675	0.204818
ENSG00000066379.10	ZNRD1	var_29943970_G_A_rs2245959	83	45	0.639137	0.597626	0.00468686	0.0336322
ENSG00000066379.10	ZNRD1	var_29943981_G_A_rs3823372	83	23	0.661234	0.604376	0.000208416	0.0037348
ENSG00000066379.10	ZNRD1	var_29944896_T_A_rs4713279	83	23	0.641099	0.612095	0.0725275	0.251104
ENSG00000066379.10	ZNRD1	var_29944931_C_G_rs9260859	83	29	0.643066	0.607815	0.0118451	0.0714697
ENSG00000066379.10	ZNRD1	var_29945210_A_T_rs3823382	83	23	0.661234	0.604376	0.000208416	0.0037348
ENSG00000066379.10	ZNRD1	var_29945368_A_G_rs3823384	83	23	0.661234	0.604376	0.000208416	0.0037348
ENSG00000066379.10	ZNRD1	var_29945508_C_T_rs9260860	83	23	0.661234	0.604376	0.000208416	0.0037348
ENSG00000066379.10	ZNRD1	var_29945841_G_A_rs9260864	83	23	0.661234	0.604376	0.000208416	0.0037348
ENSG00000066379.10	ZNRD1	var_29945898_T_C_rs9260865	83	29	0.643066	0.607815	0.0118451	0.0714697
ENSG00000066379.10	ZNRD1	var_29946021_G_A_rs9260867	83	23	0.661234	0.604376	0.000208416	0.0037348
ENSG00000066379.10	ZNRD1	var_29946157_A_G_rs9260868	83	23	0.661234	0.604376	0.000208416	0.0037348
ENSG00000066379.10	ZNRD1	var_29946453_C_T_rs9260869	83	23	0.661234	0.604376	0.000208416	0.0037348
ENSG00000066379.10	ZNRD1	var_29946503_C_T_rs9260870	83	23	0.661234	0.604376	0.000208416	0.0037348
ENSG00000066379.10	ZNRD1	var_29946571_T_A_rs9260871	83	23	0.661234	0.604376	0.000208416	0.0037348
ENSG00000066379.10	ZNRD1	var_29946577_C_A_rs9260872	83	29	0.643066	0.607815	0.0118451	0.0714697
ENSG00000066379.10	ZNRD1	var_29946656_T_C_rs9260873	83	23	0.661234	0.604376	0.000208416	0.0037348
ENSG00000066379.10	ZNRD1	var_29948401_G_A_rs9260914	83	23	0.661234	0.604376	0.000208416	0.0037348
ENSG00000066379.10	ZNRD1	var_29948708_C_T_rs9260916	83	23	0.661234	0.604376	0.000208416	0.0037348
ENSG00000066379.10	ZNRD1	var_29948716_A_T_rs9260917	83	23	0.661234	0.604376	0.000208416	0.0037348
ENSG00000066379.10	ZNRD1	var_29948751_C_T_rs9260918	83	23	0.652089	0.607882	0.00460287	0.0330745
ENSG00000066379.10	ZNRD1	var_29948884_C_T_rs9260919	83	23	0.661234	0.604376	0.000208416	0.0037348
ENSG00000066379.10	ZNRD1	var_29949047_C_T_rs9260920	83	23	0.661234	0.604376	0.000208416	0.0037348
ENSG00000066379.10	ZNRD1	var_29949889_C_T_rs9260923	83	23	0.661234	0.604376	0.000208416	0.0037348
ENSG00000066379.10	ZNRD1	var_29950492_G_A_rs3734832	83	23	0.661234	0.604376	0.000208416	0.0037348
ENSG00000066379.10	ZNRD1	var_29951782_T_C_rs9260929	83	23	0.661234	0.604376	0.000208416	0.0037348
ENSG00000066379.10	ZNRD1	var_29951928_A_G_rs3873293	83	46	0.631229	0.606336	0.125348	0.352278
ENSG00000066379.10	ZNRD1	var_29954364_C_G_rs4947244	83	23	0.641099	0.612095	0.0725275	0.251104
ENSG00000066379.10	ZNRD1	var_29955025_T_C_rs3901554	83	23	0.661234	0.604376	0.000208416	0.0037348
ENSG00000066379.10	ZNRD1	var_29956953_T_C_rs9260930	83	23	0.661234	0.604376	0.000208416	0.0037348
ENSG00000066379.10	ZNRD1	var_29957069_A_G_rs4959039	83	45	0.618808	0.621699	0.788557	1
ENSG00000066379.10	ZNRD1	var_29957078_A_G_rs6457120	83	46	0.631229	0.606336	0.125348	0.352278
ENSG00000066379.10	ZNRD1	var_29957802_T_C_rs9260932	83	29	0.643066	0.607815	0.0118451	0.0714697
ENSG00000066379.10	ZNRD1	var_29957866_A_G_rs9260933	83	23	0.661234	0.604376	0.000208416	0.0037348
ENSG00000066379.10	ZNRD1	var_29958255_CCT_C_.	83	22	0.666637	0.60336	4.69615e-05	0.00108172
ENSG00000066379.10	ZNRD1	var_29958358_T_TACAGGACATG_.	83	26	0.652486	0.605374	0.00117501	0.0144754
ENSG00000066379.10	ZNRD1	var_29958488_T_C_rs9260935	83	22	0.666637	0.60336	4.69615e-05	0.00108172
ENSG00000066379.10	ZNRD1	var_29958502_G_A_rs9260936	83	22	0.666637	0.60336	4.69615e-05	0.00108172
ENSG00000066379.10	ZNRD1	var_29958648_A_G_rs9260938	83	22	0.666637	0.60336	4.69615e-05	0.00108172
ENSG00000066379.10	ZNRD1	var_29958674_C_T_rs9260939	83	28	0.646662	0.606625	0.00470122	0.0336361
ENSG00000066379.10	ZNRD1	var_29958865_T_A_rs9260941	83	22	0.666637	0.60336	4.69615e-05	0.00108172
ENSG00000066379.10	ZNRD1	var_29958933_A_C_rs9260943	83	22	0.666637	0.60336	4.69615e-05	0.00108172
ENSG00000066379.10	ZNRD1	var_29959254_G_A_rs9260946	83	22	0.666637	0.60336	4.69615e-05	0.00108172
ENSG00000066379.10	ZNRD1	var_29959326_T_C_rs9260948	83	22	0.666637	0.60336	4.69615e-05	0.00108172
ENSG00000066379.10	ZNRD1	var_29959366_A_T_rs202063251	81	22	0.666637	0.604391	7.64585e-05	0.00166445
ENSG00000066379.10	ZNRD1	var_29959458_G_A_rs9260950	83	28	0.646662	0.606625	0.00470122	0.0336361
ENSG00000066379.10	ZNRD1	var_29959935_C_G_rs9260954	83	22	0.666637	0.60336	4.69615e-05	0.00108172
ENSG00000066379.10	ZNRD1	var_29960083_G_A_rs9260957	83	22	0.666637	0.60336	4.69615e-05	0.00108172
ENSG00000066379.10	ZNRD1	var_29960193_C_T_rs9260958	83	22	0.666637	0.60336	4.69615e-05	0.00108172
ENSG00000066379.10	ZNRD1	var_29961770_G_A_rs9260976	83	22	0.666637	0.60336	4.69615e-05	0.00108172
ENSG00000066379.10	ZNRD1	var_29962028_G_A_rs9260981	83	22	0.666637	0.60336	4.69615e-05	0.00108172
ENSG00000066379.10	ZNRD1	var_29962139_G_C_rs9260983	83	22	0.666637	0.60336	4.69615e-05	0.00108172
ENSG00000066379.10	ZNRD1	var_29962268_G_A_rs9260984	83	22	0.666637	0.60336	4.69615e-05	0.00108172
ENSG00000066379.10	ZNRD1	var_29962517_C_T_.	83	28	0.646662	0.606625	0.00470122	0.0336361
ENSG00000066379.10	ZNRD1	var_29962595_G_A_rs9260993	83	22	0.666637	0.60336	4.69615e-05	0.00108172
ENSG00000066379.10	ZNRD1	var_29962889_C_A_rs4959040	83	23	0.641099	0.612095	0.0725275	0.251104
ENSG00000066379.10	ZNRD1	var_29963065_A_G_rs6457121	83	46	0.631229	0.606336	0.125348	0.352278
ENSG00000066379.10	ZNRD1	var_29963622_A_G_rs9260998	83	22	0.666637	0.60336	4.69615e-05	0.00108172
ENSG00000066379.10	ZNRD1	var_29964314_G_C_rs9261005	83	22	0.666637	0.60336	4.69615e-05	0.00108172
ENSG00000066379.10	ZNRD1	var_29964363_T_C_rs9261006	83	46	0.631229	0.606336	0.125348	0.352278
ENSG00000066379.10	ZNRD1	var_29964805_G_A_rs9261011	83	15	0.647168	0.614168	0.0298832	0.140059
ENSG00000066379.10	ZNRD1	var_29964999_G_A_rs9261014	83	19	0.657407	0.609066	0.00146661	0.0169796
ENSG00000066379.10	ZNRD1	var_29965938_C_T_rs9261025	83	22	0.666637	0.60336	4.69615e-05	0.00108172
ENSG00000066379.10	ZNRD1	var_29966000_A_C_rs9261027	83	32	0.640818	0.607152	0.0144212	0.0821871
ENSG00000066379.10	ZNRD1	var_29966017_C_A_rs9261028	83	22	0.666637	0.60336	4.69615e-05	0.00108172
ENSG00000066379.10	ZNRD1	var_29966041_T_C_rs9261029	83	22	0.666637	0.60336	4.69615e-05	0.00108172
ENSG00000066379.10	ZNRD1	var_29966124_T_A_rs9261032	83	22	0.666637	0.60336	4.69615e-05	0.00108172
ENSG00000066379.10	ZNRD1	var_29966141_C_G_rs9261034	83	29	0.645654	0.606425	0.00462705	0.0332407
ENSG00000066379.10	ZNRD1	var_29966175_G_A_rs9261035	83	22	0.666637	0.60336	4.69615e-05	0.00108172
ENSG00000066379.10	ZNRD1	var_29966301_G_A_rs9261036	83	22	0.666637	0.60336	4.69615e-05	0.00108172
ENSG00000066379.10	ZNRD1	var_29966465_A_G_rs9261037	83	28	0.646662	0.606625	0.00470122	0.0336361
ENSG00000066379.10	ZNRD1	var_29966513_T_C_rs9261038	83	22	0.666637	0.60336	4.69615e-05	0.00108172
ENSG00000066379.10	ZNRD1	var_29966609_T_C_rs60466513	83	22	0.666637	0.60336	4.69615e-05	0.00108172
ENSG00000066379.10	ZNRD1	var_29966620_A_G_rs9261040	83	22	0.666637	0.60336	4.69615e-05	0.00108172
ENSG00000066379.10	ZNRD1	var_29966718_A_G_rs9261041	83	22	0.666637	0.60336	4.69615e-05	0.00108172
ENSG00000066379.10	ZNRD1	var_29966721_A_T_rs9261042	83	22	0.666637	0.60336	4.69615e-05	0.00108172
ENSG00000066379.10	ZNRD1	var_29966749_C_G_rs9261044	83	22	0.666637	0.60336	4.69615e-05	0.00108172
ENSG00000066379.10	ZNRD1	var_29966867_G_A_rs9261045	83	22	0.666637	0.60336	4.69615e-05	0.00108172
ENSG00000066379.10	ZNRD1	var_29967002_AT_A_.	83	22	0.666637	0.60336	4.69615e-05	0.00108172
ENSG00000066379.10	ZNRD1	var_29967004_G_C_.	83	22	0.666637	0.60336	4.69615e-05	0.00108172
ENSG00000066379.10	ZNRD1	var_29967302_A_G_rs6923777	83	46	0.631229	0.606336	0.125348	0.352278
ENSG00000066379.10	ZNRD1	var_29967486_T_C_rs6903621	83	22	0.666637	0.60336	4.69615e-05	0.00108172
ENSG00000066379.10	ZNRD1	var_29967618_C_T_rs6924054	83	28	0.646662	0.606625	0.00470122	0.0336361
ENSG00000066379.10	ZNRD1	var_29967736_A_G_rs6924097	83	39	0.632942	0.608777	0.0805601	0.262936
ENSG00000066379.10	ZNRD1	var_29967742_T_C_rs6904120	83	36	0.63803	0.606422	0.0241027	0.11931
ENSG00000066379.10	ZNRD1	var_29967799_C_G_rs9261056	83	22	0.666637	0.60336	4.69615e-05	0.00108172
ENSG00000066379.10	ZNRD1	var_29967810_A_G_rs6924273	83	22	0.666637	0.60336	4.69615e-05	0.00108172
ENSG00000066379.10	ZNRD1	var_29967999_T_C_rs9261059	83	22	0.666637	0.60336	4.69615e-05	0.00108172
ENSG00000066379.10	ZNRD1	var_29968306_G_T_rs9261063	83	22	0.666637	0.60336	4.69615e-05	0.00108172
ENSG00000066379.10	ZNRD1	var_29968374_G_A_rs9261064	83	24	0.657348	0.604993	0.000519871	0.00804268
ENSG00000066379.10	ZNRD1	var_29968394_C_A_rs9261065	83	24	0.657348	0.604993	0.000519871	0.00804268
ENSG00000066379.10	ZNRD1	var_29968407_G_A_rs9261066	83	22	0.666637	0.60336	4.69615e-05	0.00108172
ENSG00000066379.10	ZNRD1	var_29968457_C_T_rs9261067	83	22	0.666637	0.60336	4.69615e-05	0.00108172
ENSG00000066379.10	ZNRD1	var_29968458_A_G_rs9261068	83	28	0.646662	0.606625	0.00470122	0.0336361
ENSG00000066379.10	ZNRD1	var_29968507_T_C_rs9261070	83	28	0.646662	0.606625	0.00470122	0.0336361
ENSG00000066379.10	ZNRD1	var_29968557_G_A_rs9261071	83	22	0.666637	0.60336	4.69615e-05	0.00108172
ENSG00000066379.10	ZNRD1	var_29968564_T_A_rs9261072	83	22	0.666637	0.60336	4.69615e-05	0.00108172
ENSG00000066379.10	ZNRD1	var_29968621_G_A_rs9261075	83	22	0.666637	0.60336	4.69615e-05	0.00108172
ENSG00000066379.10	ZNRD1	var_29968655_A_G_rs9261076	83	20	0.669507	0.604457	8.33996e-05	0.00181058
ENSG00000066379.10	ZNRD1	var_29968681_T_C_rs113922358	83	20	0.669507	0.604457	8.33996e-05	0.00181058
ENSG00000066379.10	ZNRD1	var_29968987_A_G_rs9261080	83	22	0.666637	0.60336	4.69615e-05	0.00108172
ENSG00000066379.10	ZNRD1	var_29969040_T_C_rs9261081	83	22	0.666637	0.60336	4.69615e-05	0.00108172
ENSG00000066379.10	ZNRD1	var_29969199_C_T_rs9261082	83	22	0.666637	0.60336	4.69615e-05	0.00108172
ENSG00000066379.10	ZNRD1	var_29969205_C_G_rs9261083	83	22	0.666637	0.60336	4.69615e-05	0.00108172
ENSG00000066379.10	ZNRD1	var_29969223_C_T_rs9261084	83	22	0.666637	0.60336	4.69615e-05	0.00108172
ENSG00000066379.10	ZNRD1	var_29969330_A_AC_rs9280837	83	28	0.646662	0.606625	0.00470122	0.0336361
ENSG00000066379.10	ZNRD1	var_29969513_T_C_rs9261085	83	28	0.646662	0.606625	0.00470122	0.0336361
ENSG00000066379.10	ZNRD1	var_29969596_A_T_rs9261086	83	22	0.666637	0.60336	4.69615e-05	0.00108172
ENSG00000066379.10	ZNRD1	var_29969602_C_G_rs9261087	83	22	0.666637	0.60336	4.69615e-05	0.00108172
ENSG00000066379.10	ZNRD1	var_29969646_C_T_rs9261088	83	22	0.666637	0.60336	4.69615e-05	0.00108172
ENSG00000066379.10	ZNRD1	var_29969818_T_C_rs9261089	83	22	0.666637	0.60336	4.69615e-05	0.00108172
ENSG00000066379.10	ZNRD1	var_29969929_C_T_rs9261090	83	22	0.666637	0.60336	4.69615e-05	0.00108172
ENSG00000066379.10	ZNRD1	var_29969973_G_T_rs9261091	83	22	0.666637	0.60336	4.69615e-05	0.00108172
ENSG00000066379.10	ZNRD1	var_29970685_T_C_rs9261093	83	22	0.666637	0.60336	4.69615e-05	0.00108172
ENSG00000066379.10	ZNRD1	var_29970839_T_C_rs9261094	83	28	0.646662	0.606625	0.00470122	0.0336361
ENSG00000066379.10	ZNRD1	var_29970905_T_TG_.	83	46	0.631229	0.606336	0.125348	0.352278
ENSG00000066379.10	ZNRD1	var_29970927_C_T_rs9295826	83	24	0.646114	0.609563	0.0296609	0.139569
ENSG00000066379.10	ZNRD1	var_29971014_T_C_rs9261095	83	22	0.666637	0.60336	4.69615e-05	0.00108172
ENSG00000066379.10	ZNRD1	var_29971039_T_C_rs9261096	83	22	0.666637	0.60336	4.69615e-05	0.00108172
ENSG00000066379.10	ZNRD1	var_29971364_CAG_C_rs9278534	83	22	0.666637	0.60336	4.69615e-05	0.00108172
ENSG00000066379.10	ZNRD1	var_29971431_A_G_rs6904969	83	22	0.666637	0.60336	4.69615e-05	0.00108172
ENSG00000066379.10	ZNRD1	var_29971913_T_C_rs9261099	83	22	0.666637	0.60336	4.69615e-05	0.00108172
ENSG00000066379.10	ZNRD1	var_29972407_T_A_rs9261101	83	15	0.647168	0.614168	0.0298832	0.140059
ENSG00000066379.10	ZNRD1	var_29973526_T_C_rs9393986	83	23	0.641099	0.612095	0.0725275	0.251104
ENSG00000066379.10	ZNRD1	var_29973986_G_GA_rs34422094	83	22	0.666637	0.60336	4.69615e-05	0.00108172
ENSG00000066379.10	ZNRD1	var_29973988_C_G_rs371236241	83	22	0.666637	0.60336	4.69615e-05	0.00108172
ENSG00000066379.10	ZNRD1	var_29974130_T_C_rs7750714	83	22	0.666637	0.60336	4.69615e-05	0.00108172
ENSG00000066379.10	ZNRD1	var_29974154_G_A_rs7768931	83	22	0.666637	0.60336	4.69615e-05	0.00108172
ENSG00000066379.10	ZNRD1	var_29974608_C_G_rs9261106	83	22	0.666637	0.60336	4.69615e-05	0.00108172
ENSG00000066379.10	ZNRD1	var_29974672_T_G_rs9261107	83	22	0.666637	0.60336	4.69615e-05	0.00108172
ENSG00000066379.10	ZNRD1	var_29975049_C_G_rs6939614	83	22	0.666637	0.60336	4.69615e-05	0.00108172
ENSG00000066379.10	ZNRD1	var_29975055_A_G_rs6939480	83	28	0.646662	0.606625	0.00470122	0.0336361
ENSG00000066379.10	ZNRD1	var_29975093_A_T_rs6939616	83	22	0.666637	0.60336	4.69615e-05	0.00108172
ENSG00000066379.10	ZNRD1	var_29975095_G_C_rs6940082	83	22	0.666637	0.60336	4.69615e-05	0.00108172
ENSG00000066379.10	ZNRD1	var_29975453_C_A_rs2240619	83	46	0.631229	0.606336	0.125348	0.352278
ENSG00000066379.10	ZNRD1	var_29975587_G_A_rs9261108	83	22	0.666637	0.60336	4.69615e-05	0.00108172
ENSG00000066379.10	ZNRD1	var_29975834_C_G_rs9261109	83	22	0.666637	0.60336	4.69615e-05	0.00108172
ENSG00000066379.10	ZNRD1	var_29976419_TTGGAGCTGTGGTCAC_T_rs199713209	83	15	0.647168	0.614168	0.0298832	0.140059
ENSG00000066379.10	ZNRD1	var_29976607_G_A_rs9261112	83	22	0.666637	0.60336	4.69615e-05	0.00108172
ENSG00000066379.10	ZNRD1	var_29976789_T_C_rs2275855	83	24	0.646114	0.609563	0.0296609	0.139569
ENSG00000066379.10	ZNRD1	var_29976857_G_C_rs9261114	83	22	0.666637	0.60336	4.69615e-05	0.00108172
ENSG00000066379.10	ZNRD1	var_29977068_G_C_rs2275853	83	22	0.666637	0.60336	4.69615e-05	0.00108172
ENSG00000066379.10	ZNRD1	var_29978352_G_A_rs4713281	83	23	0.641099	0.612095	0.0725275	0.251104
ENSG00000066379.10	ZNRD1	var_29979125_G_A_rs9261118	83	22	0.666637	0.60336	4.69615e-05	0.00108172
ENSG00000066379.10	ZNRD1	var_29980073_T_C_rs3734836	83	22	0.666637	0.60336	4.69615e-05	0.00108172
ENSG00000066379.10	ZNRD1	var_29980445_G_A_rs9261130	83	22	0.666637	0.60336	4.69615e-05	0.00108172
ENSG00000066379.10	ZNRD1	var_29980493_C_T_rs3115635	83	46	0.631229	0.606336	0.125348	0.352278
ENSG00000066379.10	ZNRD1	var_29981063_T_C_rs9261132	83	29	0.644276	0.607166	0.0171718	0.093761
ENSG00000066379.10	ZNRD1	var_29981187_T_C_rs9261133	83	22	0.666637	0.60336	4.69615e-05	0.00108172
ENSG00000066379.10	ZNRD1	var_29981373_TA_T_rs113202273	83	22	0.666637	0.60336	4.69615e-05	0.00108172
ENSG00000066379.10	ZNRD1	var_29981515_C_T_rs9261138	83	22	0.666637	0.60336	4.69615e-05	0.00108172
ENSG00000066379.10	ZNRD1	var_29983039_C_T_rs6457126	83	46	0.631229	0.606336	0.125348	0.352278
ENSG00000066379.10	ZNRD1	var_29983327_C_T_rs9261141	83	19	0.657407	0.609066	0.00146661	0.0169796
ENSG00000066379.10	ZNRD1	var_29984252_G_A_rs9357092	83	24	0.639177	0.612385	0.0886603	0.2816
ENSG00000066379.10	ZNRD1	var_29984769_C_T_rs9261144	83	39	0.628736	0.612505	0.293638	0.606792
ENSG00000066379.10	ZNRD1	var_29985325_A_G_rs9261146	83	22	0.666637	0.60336	4.69615e-05	0.00108172
ENSG00000066379.10	ZNRD1	var_29985488_A_G_rs9261147	83	28	0.646662	0.606625	0.00470122	0.0336361
ENSG00000066379.10	ZNRD1	var_29985630_A_G_rs9348835	83	23	0.641099	0.612095	0.0725275	0.251104
ENSG00000066379.10	ZNRD1	var_29987184_G_A_rs4711206	83	24	0.646114	0.609563	0.0296609	0.139569
ENSG00000066379.10	ZNRD1	var_29987474_C_G_rs3869065	83	46	0.631229	0.606336	0.125348	0.352278
ENSG00000066379.10	ZNRD1	var_29987738_G_A_rs9261151	83	22	0.666637	0.60336	4.69615e-05	0.00108172
ENSG00000066379.10	ZNRD1	var_29988439_T_G_rs3891157	83	22	0.666637	0.60336	4.69615e-05	0.00108172
ENSG00000066379.10	ZNRD1	var_29988740_G_A_rs3891156	83	22	0.666637	0.60336	4.69615e-05	0.00108172
ENSG00000066379.10	ZNRD1	var_29990044_C_A_rs6912454	83	22	0.666637	0.60336	4.69615e-05	0.00108172
ENSG00000066379.10	ZNRD1	var_29990938_T_G_rs6457127	83	23	0.641099	0.612095	0.0725275	0.251104
ENSG00000066379.10	ZNRD1	var_29991538_G_T_rs9261156	83	22	0.666637	0.60336	4.69615e-05	0.00108172
ENSG00000066379.10	ZNRD1	var_29991649_A_G_rs6919438	83	22	0.666637	0.60336	4.69615e-05	0.00108172
ENSG00000066379.10	ZNRD1	var_29991798_G_A_rs6920254	83	22	0.666637	0.60336	4.69615e-05	0.00108172
ENSG00000066379.10	ZNRD1	var_29992286_C_T_rs6925061	83	22	0.666637	0.60336	4.69615e-05	0.00108172
ENSG00000066379.10	ZNRD1	var_29992953_C_G_rs9261158	83	22	0.666637	0.60336	4.69615e-05	0.00108172
ENSG00000066379.10	ZNRD1	var_29992973_G_A_rs9261159	83	28	0.646662	0.606625	0.00470122	0.0336361
ENSG00000066379.10	ZNRD1	var_29993086_T_C_rs9261160	83	22	0.666637	0.60336	4.69615e-05	0.00108172
ENSG00000066379.10	ZNRD1	var_29994294_G_GA_rs9280850	83	22	0.666637	0.60336	4.69615e-05	0.00108172
ENSG00000066379.10	ZNRD1	var_29995664_T_C_rs9261169	83	22	0.666637	0.60336	4.69615e-05	0.00108172
ENSG00000066379.10	ZNRD1	var_29996121_A_G_rs9261171	83	22	0.666637	0.60336	4.69615e-05	0.00108172
ENSG00000066379.10	ZNRD1	var_29996734_T_A_.	83	46	0.631229	0.606336	0.125348	0.352278
ENSG00000066379.10	ZNRD1	var_29996986_A_C_rs9261175	83	22	0.666637	0.60336	4.69615e-05	0.00108172
ENSG00000066379.10	ZNRD1	var_29997312_T_C_rs9261176	83	22	0.666637	0.60336	4.69615e-05	0.00108172
ENSG00000066379.10	ZNRD1	var_29997583_T_A_rs9261177	83	22	0.666637	0.60336	4.69615e-05	0.00108172
ENSG00000066379.10	ZNRD1	var_29998106_GT_G_rs374362541	83	50	0.624513	0.613494	0.586212	0.894492
ENSG00000066379.10	ZNRD1	var_29998260_C_T_rs9261179	83	22	0.666637	0.60336	4.69615e-05	0.00108172
ENSG00000066379.10	ZNRD1	var_29998815_A_AT_rs9280853	83	26	0.648274	0.607295	0.00506196	0.0359948
ENSG00000066379.10	ZNRD1	var_29999109_T_C_rs3098018	83	45	0.630903	0.607377	0.158685	0.411784
ENSG00000066379.10	ZNRD1	var_29999185_C_A_rs9261184	82	18	0.659058	0.607697	0.000894963	0.0123595
ENSG00000066379.10	ZNRD1	var_30000520_C_A_rs3094144	83	46	0.631229	0.606336	0.125348	0.352278
ENSG00000066379.10	ZNRD1	var_30001950_G_A_rs9261191	83	22	0.666637	0.60336	4.69615e-05	0.00108172
ENSG00000066379.10	ZNRD1	var_30002173_T_C_rs9261193	83	22	0.666637	0.60336	4.69615e-05	0.00108172
ENSG00000066379.10	ZNRD1	var_30002441_C_G_rs3121594	83	46	0.631229	0.606336	0.125348	0.352278
ENSG00000066379.10	ZNRD1	var_30002881_T_C_rs166327	83	50	0.624513	0.613494	0.586212	0.894492
ENSG00000066379.10	ZNRD1	var_30004382_G_GTTGCT_rs9280856	83	22	0.666637	0.60336	4.69615e-05	0.00108172
ENSG00000066379.10	ZNRD1	var_30005043_A_G_rs9261203	83	22	0.666637	0.60336	4.69615e-05	0.00108172
ENSG00000066379.10	ZNRD1	var_30005754_C_A_rs4711207	83	23	0.641099	0.612095	0.0725275	0.251104
ENSG00000066379.10	ZNRD1	var_30005761_CAA_C_rs9278546	83	22	0.666637	0.60336	4.69615e-05	0.00108172
ENSG00000066379.10	ZNRD1	var_30006482_T_C_rs9261207	83	22	0.666637	0.60336	4.69615e-05	0.00108172
ENSG00000066379.10	ZNRD1	var_30006522_C_CACTATCA_rs140532428	83	46	0.631229	0.606336	0.125348	0.352278
ENSG00000066379.10	ZNRD1	var_30006765_G_A_rs9405044	83	23	0.641099	0.612095	0.0725275	0.251104
ENSG00000066379.10	ZNRD1	var_30008746_A_C_rs3910312	83	23	0.641099	0.612095	0.0725275	0.251104
ENSG00000066379.10	ZNRD1	var_30009169_C_T_rs9393987	83	23	0.641099	0.612095	0.0725275	0.251104
ENSG00000066379.10	ZNRD1	var_30009214_T_A_rs9261213	83	22	0.666637	0.60336	4.69615e-05	0.00108172
ENSG00000066379.10	ZNRD1	var_30009721_T_TC_.	83	46	0.631229	0.606336	0.125348	0.352278
ENSG00000066379.10	ZNRD1	var_30010080_CAA_C_rs10580504	83	23	0.641099	0.612095	0.0725275	0.251104
ENSG00000066379.10	ZNRD1	var_30010492_T_C_rs9380150	83	28	0.636675	0.61171	0.124486	0.350581
ENSG00000066379.10	ZNRD1	var_30011275_G_A_rs9261218	83	22	0.666637	0.60336	4.69615e-05	0.00108172
ENSG00000066379.10	ZNRD1	var_30011451_G_A_rs9261219	83	19	0.657407	0.609066	0.00146661	0.0169796
ENSG00000066379.10	ZNRD1	var_30011863_G_T_rs9261220	83	22	0.666637	0.60336	4.69615e-05	0.00108172
ENSG00000066379.10	ZNRD1	var_30012654_CTCTTTAAGTATGAAAT_C_rs371793437	83	22	0.666637	0.60336	4.69615e-05	0.00108172
ENSG00000066379.10	ZNRD1	var_30013393_C_CT_rs9280859	83	22	0.666637	0.60336	4.69615e-05	0.00108172
ENSG00000066379.10	ZNRD1	var_30013772_T_C_rs9261223	83	22	0.666637	0.60336	4.69615e-05	0.00108172
ENSG00000066379.10	ZNRD1	var_30014457_C_T_rs9261226	83	22	0.666637	0.60336	4.69615e-05	0.00108172
ENSG00000066379.10	ZNRD1	var_30015069_G_A_rs6925856	83	22	0.666637	0.60336	4.69615e-05	0.00108172
ENSG00000066379.10	ZNRD1	var_30015502_T_TA_rs9280861	83	22	0.666637	0.60336	4.69615e-05	0.00108172
ENSG00000066379.10	ZNRD1	var_30015594_G_T_rs7766469	83	24	0.646114	0.609563	0.0296609	0.139569
ENSG00000066379.10	ZNRD1	var_30016573_A_G_rs7771476	83	22	0.666637	0.60336	4.69615e-05	0.00108172
ENSG00000066379.10	ZNRD1	var_30016676_G_A_rs9393988	83	24	0.646114	0.609563	0.0296609	0.139569
ENSG00000066379.10	ZNRD1	var_30016694_A_C_rs7771672	83	22	0.666637	0.60336	4.69615e-05	0.00108172
ENSG00000066379.10	ZNRD1	var_30016831_C_G_rs6457141	83	34	0.632226	0.61174	0.184952	0.459023
ENSG00000066379.10	ZNRD1	var_30017629_T_A_rs9261242	83	22	0.666637	0.60336	4.69615e-05	0.00108172
ENSG00000066379.10	ZNRD1	var_30017927_C_CA_rs9280864	83	46	0.631229	0.606336	0.125348	0.352278
ENSG00000066379.10	ZNRD1	var_30018015_G_A_rs9261244	83	46	0.631229	0.606336	0.125348	0.352278
ENSG00000066379.10	ZNRD1	var_30018024_T_TA_rs9280865	83	22	0.666637	0.60336	4.69615e-05	0.00108172
ENSG00000066379.10	ZNRD1	var_30019515_G_A_rs9261248	83	22	0.666637	0.60336	4.69615e-05	0.00108172
ENSG00000066379.10	ZNRD1	var_30019561_C_A_rs201388676	83	22	0.666637	0.60336	4.69615e-05	0.00108172
ENSG00000066379.10	ZNRD1	var_30019589_A_ACACACACC_.	83	8	0.674409	0.614342	0.0127026	0.0753226
ENSG00000066379.10	ZNRD1	var_30019589_A_ACACACC_.	83	10	0.644385	0.616809	0.100234	0.311343
ENSG00000066379.10	ZNRD1	var_30019654_T_C_rs9261250	83	22	0.666637	0.60336	4.69615e-05	0.00108172
ENSG00000066379.10	ZNRD1	var_30019769_T_A_rs9261251	83	34	0.632226	0.61174	0.184952	0.459023
ENSG00000066379.10	ZNRD1	var_30020642_T_G_rs9261253	83	22	0.666637	0.60336	4.69615e-05	0.00108172
ENSG00000066379.10	ZNRD1	var_30021201_A_T_rs9261254	83	34	0.632226	0.61174	0.184952	0.459023
ENSG00000066379.10	ZNRD1	var_30021413_G_A_rs9261255	83	34	0.632226	0.61174	0.184952	0.459023
ENSG00000066379.10	ZNRD1	var_30022202_T_TA_rs113615170	83	22	0.666637	0.60336	4.69615e-05	0.00108172
ENSG00000066379.10	ZNRD1	var_30022203_T_G_rs9256991	83	22	0.666637	0.60336	4.69615e-05	0.00108172
ENSG00000066379.10	ZNRD1	var_30022425_G_A_rs9261257	83	22	0.666637	0.60336	4.69615e-05	0.00108172
ENSG00000066379.10	ZNRD1	var_30024749_C_G_rs9261263	83	22	0.666637	0.60336	4.69615e-05	0.00108172
ENSG00000066379.10	ZNRD1	var_30025210_T_C_rs9261264	83	22	0.666637	0.60336	4.69615e-05	0.00108172
ENSG00000066379.10	ZNRD1	var_30025984_G_C_rs6917477	83	34	0.632226	0.61174	0.184952	0.459023
ENSG00000066379.10	ZNRD1	var_30026350_T_C_rs9261265	83	22	0.666637	0.60336	4.69615e-05	0.00108172
ENSG00000066379.10	ZNRD1	var_30028477_T_C_rs3757332	83	22	0.666637	0.60336	4.69615e-05	0.00108172
ENSG00000066379.10	ZNRD1	var_30028800_A_G_rs9295829	83	23	0.641099	0.612095	0.0725275	0.251104
ENSG00000066379.10	ZNRD1	var_30028807_A_C_rs7769930	83	34	0.632226	0.61174	0.184952	0.459023
ENSG00000066379.10	ZNRD1	var_30028871_C_T_rs7770092	83	34	0.632226	0.61174	0.184952	0.459023
ENSG00000066379.10	ZNRD1	var_30028913_G_A_rs7770505	83	22	0.666637	0.60336	4.69615e-05	0.00108172
ENSG00000066379.10	ZNRD1	var_30029109_C_G_rs7770557	83	34	0.632226	0.61174	0.184952	0.459023
ENSG00000066379.10	ZNRD1	var_30029172_A_AG_rs9280878	83	22	0.666637	0.60336	4.69615e-05	0.00108172
ENSG00000066379.10	ZNRD1	var_30030057_G_A_rs10745	83	22	0.666637	0.60336	4.69615e-05	0.00108172
ENSG00000066379.10	ZNRD1	var_30030135_G_A_rs9261270	83	22	0.666637	0.60336	4.69615e-05	0.00108172
ENSG00000066379.10	ZNRD1	var_30030189_T_A_rs9261271	83	22	0.666637	0.60336	4.69615e-05	0.00108172
ENSG00000066379.10	ZNRD1	var_30030641_G_A_rs9261273	83	19	0.657407	0.609066	0.00146661	0.0169796
ENSG00000066379.10	ZNRD1	var_30030927_A_ATT_rs138940267	83	22	0.666637	0.60336	4.69615e-05	0.00108172
ENSG00000066379.10	ZNRD1	var_30031059_C_T_rs9261276	83	22	0.666637	0.60336	4.69615e-05	0.00108172
ENSG00000066379.10	ZNRD1	var_30031345_T_C_rs1150739	83	51	0.627036	0.609129	0.314525	0.627294
ENSG00000066379.10	ZNRD1	var_30032097_AAAG_A_rs144856153	83	22	0.666637	0.60336	4.69615e-05	0.00108172
ENSG00000066379.10	ZNRD1	var_30033690_G_T_rs3807030	83	22	0.666637	0.60336	4.69615e-05	0.00108172
ENSG00000066379.10	ZNRD1	var_30034343_TGTTA_T_rs370725085	83	22	0.666637	0.60336	4.69615e-05	0.00108172
ENSG00000066379.10	ZNRD1	var_30035457_T_G_rs9261282	83	34	0.632226	0.61174	0.184952	0.459023
ENSG00000066379.10	ZNRD1	var_30035805_T_A_rs9261284	83	22	0.666637	0.60336	4.69615e-05	0.00108172
ENSG00000066379.10	ZNRD1	var_30036083_C_A_rs9261285	83	22	0.666637	0.60336	4.69615e-05	0.00108172
ENSG00000066379.10	ZNRD1	var_30036269_A_G_rs9261286	83	22	0.666637	0.60336	4.69615e-05	0.00108172
ENSG00000066379.10	ZNRD1	var_30036570_A_G_rs9261287	83	22	0.666637	0.60336	4.69615e-05	0.00108172
ENSG00000066379.10	ZNRD1	var_30037659_C_T_rs2240067	83	19	0.657407	0.609066	0.00146661	0.0169796
ENSG00000066379.10	ZNRD1	var_30037908_A_T_rs1051133	83	24	0.657561	0.604907	0.000464498	0.00723553
ENSG00000066379.10	ZNRD1	var_30038366_AG_A_rs111785008	83	22	0.666637	0.60336	4.69615e-05	0.00108172
ENSG00000066379.10	ZNRD1	var_30039418_C_T_rs2301752	83	19	0.657407	0.609066	0.00146661	0.0169796
ENSG00000066379.10	ZNRD1	var_30039484_C_T_rs2301751	83	22	0.666637	0.60336	4.69615e-05	0.00108172
ENSG00000066379.10	ZNRD1	var_30039752_T_A_rs9261296	83	22	0.666637	0.60336	4.69615e-05	0.00108172
ENSG00000066379.10	ZNRD1	var_30040084_G_A_rs9393989	83	24	0.646114	0.609563	0.0296609	0.139569
ENSG00000066379.10	ZNRD1	var_30040291_C_T_rs10947050	83	23	0.641099	0.612095	0.0725275	0.251104
ENSG00000066379.10	ZNRD1	var_30040603_G_A_rs12200084	83	23	0.641099	0.612095	0.0725275	0.251104
ENSG00000066379.10	ZNRD1	var_30042668_T_C_rs9261303	83	22	0.666637	0.60336	4.69615e-05	0.00108172
ENSG00000066379.10	ZNRD1	var_30043171_G_C_rs9261304	83	22	0.666637	0.60336	4.69615e-05	0.00108172
ENSG00000066379.10	ZNRD1	var_30043764_C_T_rs9261305	83	22	0.666637	0.60336	4.69615e-05	0.00108172
ENSG00000066379.10	ZNRD1	var_30043971_TTGA_T_rs375934146	83	22	0.666637	0.60336	4.69615e-05	0.00108172
ENSG00000066379.10	ZNRD1	var_30044914_G_A_rs3807036	83	22	0.666637	0.60336	4.69615e-05	0.00108172
ENSG00000066379.10	ZNRD1	var_30046540_T_C_rs9261312	83	22	0.666637	0.60336	4.69615e-05	0.00108172
ENSG00000066379.10	ZNRD1	var_30046752_C_A_rs9261313	83	22	0.666637	0.60336	4.69615e-05	0.00108172
ENSG00000066379.10	ZNRD1	var_30046983_A_T_rs9261314	83	22	0.666637	0.60336	4.69615e-05	0.00108172
ENSG00000066379.10	ZNRD1	var_30047403_G_A_rs4711209	83	23	0.641099	0.612095	0.0725275	0.251104
ENSG00000066379.10	ZNRD1	var_30047503_G_T_rs9261315	83	22	0.666637	0.60336	4.69615e-05	0.00108172
ENSG00000066379.10	ZNRD1	var_30047837_G_A_rs9261316	83	22	0.666637	0.60336	4.69615e-05	0.00108172
ENSG00000066379.10	ZNRD1	var_30048305_A_T_rs9261317	83	22	0.666637	0.60336	4.69615e-05	0.00108172
ENSG00000066379.10	ZNRD1	var_30054746_G_A_rs9261359	83	22	0.666637	0.60336	4.69615e-05	0.00108172
ENSG00000066379.10	ZNRD1	var_30055667_C_T_rs9261360	83	22	0.666637	0.60336	4.69615e-05	0.00108172
ENSG00000066379.10	ZNRD1	var_30056177_A_G_rs9261362	83	21	0.662285	0.605854	0.000188265	0.00356339
ENSG00000066379.10	ZNRD1	var_30056985_A_G_rs9261364	83	22	0.666637	0.60336	4.69615e-05	0.00108172
ENSG00000066379.10	ZNRD1	var_30057675_C_T_rs9261365	83	22	0.666637	0.60336	4.69615e-05	0.00108172
ENSG00000066379.10	ZNRD1	var_30058241_T_A_rs9261367	83	22	0.666637	0.60336	4.69615e-05	0.00108172
ENSG00000066379.10	ZNRD1	var_30058605_G_A_rs9261369	83	22	0.666637	0.60336	4.69615e-05	0.00108172
ENSG00000066379.10	ZNRD1	var_30059055_C_G_rs9261372	83	22	0.666637	0.60336	4.69615e-05	0.00108172
ENSG00000066379.10	ZNRD1	var_30059273_T_C_rs77627704	83	22	0.666637	0.60336	4.69615e-05	0.00108172
ENSG00000066379.10	ZNRD1	var_30059451_A_G_rs76702759	83	22	0.666637	0.60336	4.69615e-05	0.00108172
ENSG00000066379.10	ZNRD1	var_30059819_T_C_rs9261377	83	22	0.666637	0.60336	4.69615e-05	0.00108172
ENSG00000066379.10	ZNRD1	var_30059888_C_T_rs9261379	83	22	0.666637	0.60336	4.69615e-05	0.00108172
ENSG00000066379.10	ZNRD1	var_30060002_G_A_rs9261381	83	22	0.666637	0.60336	4.69615e-05	0.00108172
ENSG00000066379.10	ZNRD1	var_30060254_C_T_rs2158289	83	22	0.666637	0.60336	4.69615e-05	0.00108172
ENSG00000066379.10	ZNRD1	var_30060255_G_T_rs2158288	83	22	0.666637	0.60336	4.69615e-05	0.00108172
ENSG00000066379.10	ZNRD1	var_30061047_CA_C_rs368834955	83	22	0.666637	0.60336	4.69615e-05	0.00108172
ENSG00000066379.10	ZNRD1	var_30061293_G_A_rs9261386	83	22	0.666637	0.60336	4.69615e-05	0.00108172
ENSG00000066379.10	ZNRD1	var_30062058_G_A_rs6923832	83	22	0.666637	0.60336	4.69615e-05	0.00108172
ENSG00000066379.10	ZNRD1	var_30065319_G_A_rs1264704	83	37	0.627261	0.614397	0.40388	0.729077
ENSG00000066379.10	ZNRD1	var_30069525_G_T_rs9261403	83	15	0.647168	0.614168	0.0298832	0.140059
ENSG00000066379.10	ZNRD1	var_30074163_G_A_rs2517600	83	44	0.624689	0.614991	0.405787	0.731797
ENSG00000066379.10	ZNRD1	var_30391975_A_T_rs3130127	83	41	0.616458	0.623718	0.720421	1
ENSG00000066379.10	ZNRD1	var_30952361_C_A_rs9348845	83	19	0.612109	0.622514	0.547469	0.856344
ENSG00000137310.7	TCF19	var_31059462_G_A_rs2535298	39	6	0.731105	0.654376	0.0762056	0.251104
ENSG00000137310.7	TCF19	var_31073597_C_G_rs2517494	39	6	0.731105	0.654376	0.0762056	0.251104
ENSG00000137310.7	TCF19	var_31073777_A_ATAT_.	39	6	0.731105	0.654376	0.0762056	0.251104
ENSG00000137310.7	TCF19	var_31107087_T_C_rs3094663	39	16	0.690655	0.649155	0.314728	0.627369
ENSG00000137310.7	TCF19	var_31107245_A_G_rs3130464	39	16	0.690655	0.649155	0.314728	0.627369
ENSG00000137310.7	TCF19	var_31107258_T_C_rs2285803	39	16	0.690655	0.649155	0.314728	0.627369
ENSG00000137310.7	TCF19	var_31107904_C_G_rs2233942	39	12	0.68641	0.65719	0.461306	0.784609
ENSG00000137310.7	TCF19	var_31108485_G_A_rs3130454	39	16	0.690655	0.649155	0.314728	0.627369
ENSG00000137310.7	TCF19	var_31109943_A_G_rs3132540	39	12	0.68641	0.65719	0.461306	0.784609
ENSG00000137310.7	TCF19	var_31111180_T_C_rs130073	39	16	0.690655	0.649155	0.314728	0.627369
ENSG00000137310.7	TCF19	var_31111625_T_C_rs3131011	39	12	0.68641	0.65719	0.461306	0.784609
ENSG00000137310.7	TCF19	var_31112899_C_T_rs3094226	39	12	0.68641	0.65719	0.461306	0.784609
ENSG00000137310.7	TCF19	var_31112925_C_T_rs2073719	39	12	0.68641	0.65719	0.461306	0.784609
ENSG00000137310.7	TCF19	var_31113030_A_G_rs3132539	39	12	0.68641	0.65719	0.461306	0.784609
ENSG00000137310.7	TCF19	var_31113052_G_A_rs3094225	39	13	0.701134	0.648704	0.219483	0.515448
ENSG00000137310.7	TCF19	var_31113106_A_G_rs3130575	39	12	0.68641	0.65719	0.461306	0.784609
ENSG00000137310.7	TCF19	var_31113275_A_G_rs886401	39	17	0.683494	0.652803	0.332518	0.646699
ENSG00000137310.7	TCF19	var_31113276_G_A_.	39	17	0.683494	0.652803	0.332518	0.646699
ENSG00000137310.7	TCF19	var_31113842_A_G_rs3132538	39	12	0.68641	0.65719	0.461306	0.784609
ENSG00000137310.7	TCF19	var_31114019_A_G_rs3132537	39	16	0.690655	0.649155	0.314728	0.627369
ENSG00000137310.7	TCF19	var_31114449_C_T_rs2240065	39	12	0.68641	0.65719	0.461306	0.784609
ENSG00000137310.7	TCF19	var_31114762_A_G_rs2240062	39	12	0.68641	0.65719	0.461306	0.784609
ENSG00000137310.7	TCF19	var_31114900_A_G_rs2240060	39	16	0.690655	0.649155	0.314728	0.627369
ENSG00000137310.7	TCF19	var_31115604_T_C_rs3131013	39	16	0.690655	0.649155	0.314728	0.627369
ENSG00000137310.7	TCF19	var_31115874_A_G_rs9263758	39	16	0.690655	0.649155	0.314728	0.627369
ENSG00000137310.7	TCF19	var_31116526_A_G_rs3132535	39	16	0.690655	0.649155	0.314728	0.627369
ENSG00000137310.7	TCF19	var_31116739_A_G_rs9263761	39	12	0.68641	0.65719	0.461306	0.784609
ENSG00000137310.7	TCF19	var_31117053_A_G_rs2022084	39	12	0.68641	0.65719	0.461306	0.784609
ENSG00000137310.7	TCF19	var_31117378_A_C_rs3094227	39	12	0.68641	0.65719	0.461306	0.784609
ENSG00000137310.7	TCF19	var_31117619_T_C_rs3130498	39	12	0.68641	0.65719	0.461306	0.784609
ENSG00000137310.7	TCF19	var_31118565_C_G_rs130078	39	12	0.68641	0.65719	0.461306	0.784609
ENSG00000137310.7	TCF19	var_31119889_T_C_rs3130499	39	12	0.68641	0.65719	0.461306	0.784609
ENSG00000137310.7	TCF19	var_31119976_T_A_rs3130500	39	12	0.68641	0.65719	0.461306	0.784609
ENSG00000137310.7	TCF19	var_31119997_G_T_rs3130446	39	12	0.68641	0.65719	0.461306	0.784609
ENSG00000137310.7	TCF19	var_31120614_C_T_rs2240059	39	12	0.68641	0.65719	0.461306	0.784609
ENSG00000137310.7	TCF19	var_31121513_C_T_rs3130450	39	12	0.68641	0.65719	0.461306	0.784609
ENSG00000137310.7	TCF19	var_31123242_A_G_rs3130451	39	12	0.68641	0.65719	0.461306	0.784609
ENSG00000137310.7	TCF19	var_31123313_A_G_rs3130452	39	12	0.68641	0.65719	0.461306	0.784609
ENSG00000137310.7	TCF19	var_31128259_A_G_rs9263788	39	12	0.68641	0.65719	0.461306	0.784609
ENSG00000137310.7	TCF19	var_31128552_A_C_rs3130934	39	29	0.684769	0.612276	0.0637435	0.229253
ENSG00000137310.7	TCF19	var_31129616_A_G_rs2073721	39	12	0.68641	0.65719	0.461306	0.784609
ENSG00000137310.7	TCF19	var_31130078_T_C_rs2073723	39	12	0.68641	0.65719	0.461306	0.784609
ENSG00000137310.7	TCF19	var_31130502_T_C_rs1065461	39	12	0.68641	0.65719	0.461306	0.784609
ENSG00000137310.7	TCF19	var_31131569_C_T_rs3132528	39	12	0.68641	0.65719	0.461306	0.784609
ENSG00000137310.7	TCF19	var_31131603_G_GT_rs201940759	39	12	0.68641	0.65719	0.461306	0.784609
ENSG00000137310.7	TCF19	var_31131609_A_T_.	39	12	0.68641	0.65719	0.461306	0.784609
ENSG00000137310.7	TCF19	var_31131611_A_C_.	39	12	0.68641	0.65719	0.461306	0.784609
ENSG00000137310.7	TCF19	var_31132649_A_C_rs2394882	39	29	0.684769	0.612276	0.0637435	0.229253
ENSG00000137310.7	TCF19	var_31132689_T_TGA_.	39	29	0.684769	0.612276	0.0637435	0.229253
ENSG00000137310.7	TCF19	var_31133509_G_A_rs2106074	39	29	0.684769	0.612276	0.0637435	0.229253
ENSG00000137310.7	TCF19	var_31133577_A_AAAGCCC_rs145919884	39	28	0.677874	0.636417	0.209608	0.499347
ENSG00000137310.7	TCF19	var_31133620_T_TAG_.	39	29	0.684769	0.612276	0.0637435	0.229253
ENSG00000137310.7	TCF19	var_31133943_C_A_rs3130932	39	29	0.684769	0.612276	0.0637435	0.229253
ENSG00000137310.7	TCF19	var_31134118_C_CGAG_.	39	14	0.678786	0.659122	0.533743	0.841872
ENSG00000137310.7	TCF19	var_31134439_GAA_GA_.	39	29	0.673244	0.645697	0.382379	0.710609
ENSG00000137310.7	TCF19	var_31134888_T_C_rs3130931	39	14	0.678786	0.659122	0.533743	0.841872
ENSG00000137310.7	TCF19	var_31135172_T_A_rs3130930	39	29	0.684769	0.612276	0.0637435	0.229253
ENSG00000137310.7	TCF19	var_31135207_T_C_rs3130929	39	12	0.68641	0.65719	0.461306	0.784609
ENSG00000137310.7	TCF19	var_31135706_C_T_rs9263804	39	12	0.68641	0.65719	0.461306	0.784609
ENSG00000137310.7	TCF19	var_31135735_A_C_rs9263805	39	12	0.68641	0.65719	0.461306	0.784609
ENSG00000137310.7	TCF19	var_31136097_C_A_rs3130928	39	12	0.68641	0.65719	0.461306	0.784609
ENSG00000137310.7	TCF19	var_31136240_G_A_rs3094194	39	15	0.648438	0.67727	0.466312	0.790306
ENSG00000137310.7	TCF19	var_31136453_A_G_rs3130501	39	12	0.68641	0.65719	0.461306	0.784609
ENSG00000137310.7	TCF19	var_31136666_A_G_rs3130502	39	12	0.68641	0.65719	0.461306	0.784609
ENSG00000137310.7	TCF19	var_31136714_T_C_rs3132524	39	12	0.68641	0.65719	0.461306	0.784609
ENSG00000137310.7	TCF19	var_31136832_T_C_rs3132523	39	12	0.68641	0.65719	0.461306	0.784609
ENSG00000137310.7	TCF19	var_31137165_A_G_rs3130503	39	12	0.68641	0.65719	0.461306	0.784609
ENSG00000137310.7	TCF19	var_31137759_T_C_rs3132522	39	12	0.68641	0.65719	0.461306	0.784609
ENSG00000137310.7	TCF19	var_31137804_C_G_rs3094192	39	12	0.68641	0.65719	0.461306	0.784609
ENSG00000137310.7	TCF19	var_31137837_A_T_rs3130504	39	12	0.68641	0.65719	0.461306	0.784609
ENSG00000137310.7	TCF19	var_31141209_A_G_rs2269712	39	16	0.689599	0.64989	0.342987	0.655539
ENSG00000137310.7	TCF19	var_31141836_C_T_rs3132517	39	12	0.685002	0.657816	0.49886	0.811335
ENSG00000137310.7	TCF19	var_31144695_T_C_rs3134789	39	11	0.676691	0.662052	0.77023	1
ENSG00000137310.7	TCF19	var_31147081_C_T_rs3131017	39	11	0.676691	0.662052	0.77023	1
ENSG00000137310.7	TCF19	var_31150618_G_A_rs3130509	39	11	0.676691	0.662052	0.77023	1
ENSG00000137310.7	TCF19	var_31156606_A_C_rs4343960	39	11	0.676691	0.662052	0.77023	1
ENSG00000137310.7	TCF19	var_31160188_A_G_rs3130460	39	11	0.676691	0.662052	0.77023	1
ENSG00000137310.7	TCF19	var_31161210_T_G_rs3095238	39	11	0.676691	0.662052	0.77023	1
ENSG00000137310.7	TCF19	var_31161347_A_G_rs3095237	39	11	0.676691	0.662052	0.77023	1
ENSG00000137310.7	TCF19	var_31164700_G_A_rs3130461	39	11	0.676691	0.662052	0.77023	1
ENSG00000137310.7	TCF19	var_31165150_G_C_rs3094610	39	11	0.676691	0.662052	0.77023	1
ENSG00000137310.7	TCF19	var_31165277_A_G_rs3130462	39	11	0.676691	0.662052	0.77023	1
ENSG00000137310.7	TCF19	var_31165566_T_C_rs3094609	39	11	0.676691	0.662052	0.77023	1
ENSG00000137310.7	TCF19	var_31165962_G_A_rs3130463	39	11	0.676691	0.662052	0.77023	1
ENSG00000137310.7	TCF19	var_31166683_G_A_rs3094608	39	11	0.676691	0.662052	0.77023	1
ENSG00000137310.7	TCF19	var_31169539_A_G_rs3094607	39	11	0.676691	0.662052	0.77023	1
ENSG00000137310.7	TCF19	var_31170020_G_C_rs3132511	39	11	0.676691	0.662052	0.77023	1
ENSG00000137310.7	TCF19	var_31173678_A_G_rs3094606	39	10	0.693682	0.656698	0.382379	0.710609
ENSG00000137310.7	TCF19	var_31174521_T_C_rs3132509	39	10	0.693682	0.656698	0.382379	0.710609
ENSG00000137310.7	TCF19	var_31174796_G_T_rs3132508	39	10	0.693682	0.656698	0.382379	0.710609
ENSG00000137310.7	TCF19	var_31175613_A_C_rs3132507	39	10	0.693682	0.656698	0.382379	0.710609
ENSG00000137310.7	TCF19	var_31177915_G_A_rs3130952	39	10	0.693682	0.656698	0.382379	0.710609
ENSG00000137310.7	TCF19	var_31178000_A_G_rs3130512	39	10	0.693682	0.656698	0.382379	0.710609
ENSG00000137310.7	TCF19	var_31178743_T_G_rs3132504	39	10	0.693682	0.656698	0.382379	0.710609
ENSG00000137310.7	TCF19	var_31179006_A_T_rs3132503	39	10	0.693682	0.656698	0.382379	0.710609
ENSG00000137310.7	TCF19	var_31179932_G_C_rs3130466	39	10	0.693682	0.656698	0.382379	0.710609
ENSG00000137310.7	TCF19	var_31185977_T_G_rs3132501	39	10	0.693682	0.656698	0.382379	0.710609
ENSG00000137310.7	TCF19	var_31186868_T_C_rs3130951	39	10	0.693682	0.656698	0.382379	0.710609
ENSG00000137310.7	TCF19	var_31189952_C_G_rs3130950	39	11	0.676691	0.662052	0.77023	1
ENSG00000137310.7	TCF19	var_31190795_C_G_rs3130468	39	11	0.676691	0.662052	0.77023	1
ENSG00000137310.7	TCF19	var_31191709_T_C_rs3130518	39	11	0.676691	0.662052	0.77023	1
ENSG00000137310.7	TCF19	var_31192064_A_AC_rs9281268	39	11	0.676691	0.662052	0.77023	1
ENSG00000137310.7	TCF19	var_31194747_G_A_rs3095252	39	11	0.676691	0.662052	0.77023	1
ENSG00000137310.7	TCF19	var_31195120_T_C_rs3130520	39	11	0.676691	0.662052	0.77023	1
ENSG00000137310.7	TCF19	var_31195828_A_G_rs9264024	39	11	0.676691	0.662052	0.77023	1
ENSG00000137310.7	TCF19	var_31197514_C_G_rs3130941	39	11	0.676691	0.662052	0.77023	1
ENSG00000137310.7	TCF19	var_31197633_G_A_rs3134782	39	11	0.676691	0.662052	0.77023	1
ENSG00000137310.7	TCF19	var_31199460_T_C_rs3130528	39	11	0.676691	0.662052	0.77023	1
ENSG00000137310.7	TCF19	var_31207920_C_T_rs3132499	39	11	0.676691	0.662052	0.77023	1
ENSG00000137310.7	TCF19	var_31208453_A_G_rs3130532	39	11	0.676691	0.662052	0.77023	1
ENSG00000137310.7	TCF19	var_31213453_G_A_rs75899922	39	11	0.676691	0.662052	0.77023	1
ENSG00000137310.7	TCF19	var_31213879_T_C_rs3095246	39	11	0.676691	0.662052	0.77023	1
ENSG00000137310.7	TCF19	var_31216672_T_A_rs3130415	39	11	0.676691	0.662052	0.77023	1
ENSG00000137310.7	TCF19	var_31217479_A_G_rs3134753	39	11	0.676691	0.662052	0.77023	1
ENSG00000137310.7	TCF19	var_31218034_G_A_rs75076268	39	11	0.676691	0.662052	0.77023	1
ENSG00000137310.7	TCF19	var_31218535_A_C_rs3130426	39	11	0.676691	0.662052	0.77023	1
ENSG00000137310.7	TCF19	var_31219090_G_A_rs3130428	39	11	0.676691	0.662052	0.77023	1
ENSG00000137310.7	TCF19	var_31220421_C_T_rs3134748	39	11	0.676691	0.662052	0.77023	1
ENSG00000137310.7	TCF19	var_31221573_A_G_rs3095256	39	10	0.664686	0.666696	0.886795	1
ENSG00000137310.7	TCF19	var_31222119_G_A_rs9264227	39	9	0.654936	0.669554	0.682126	0.981771
ENSG00000137310.7	TCF19	var_31222516_G_C_rs79093165	39	9	0.654936	0.669554	0.682126	0.981771
ENSG00000137310.7	TCF19	var_31222524_G_T_rs9264240	39	9	0.654936	0.669554	0.682126	0.981771
ENSG00000137310.7	TCF19	var_31222551_C_T_rs9264241	39	10	0.664686	0.666696	0.886795	1
ENSG00000137310.7	TCF19	var_31222584_T_C_rs9264242	39	11	0.676691	0.662052	0.77023	1
ENSG00000137310.7	TCF19	var_31222607_A_G_rs9264243	39	10	0.664686	0.666696	0.886795	1
ENSG00000137310.7	TCF19	var_31222610_G_A_rs9264244	39	9	0.654936	0.669554	0.682126	0.981771
ENSG00000137310.7	TCF19	var_31227457_T_C_rs9264333	39	9	0.654936	0.669554	0.682126	0.981771
ENSG00000137310.7	TCF19	var_31227475_T_C_rs9264334	39	10	0.664686	0.666696	0.886795	1
ENSG00000137310.7	TCF19	var_31227494_C_A_rs9264335	39	9	0.654936	0.669554	0.682126	0.981771
ENSG00000137310.7	TCF19	var_31227506_A_G_rs9264337	39	9	0.654936	0.669554	0.682126	0.981771
ENSG00000137310.7	TCF19	var_31227577_C_T_rs9264338	39	9	0.654936	0.669554	0.682126	0.981771
ENSG00000137310.7	TCF19	var_31227588_G_T_rs9264339	39	9	0.654936	0.669554	0.682126	0.981771
ENSG00000137310.7	TCF19	var_31227713_G_T_rs9264341	39	10	0.664686	0.666696	0.886795	1
ENSG00000137310.7	TCF19	var_31228040_T_C_rs9264346	39	10	0.664686	0.666696	0.886795	1
ENSG00000137310.7	TCF19	var_31228087_G_A_rs9264351	39	10	0.664686	0.666696	0.886795	1
ENSG00000137310.7	TCF19	var_31228104_A_G_rs9264352	39	10	0.664686	0.666696	0.886795	1
ENSG00000137310.7	TCF19	var_31228174_A_C_rs9264353	39	10	0.664686	0.666696	0.886795	1
ENSG00000137310.7	TCF19	var_31228185_T_G_rs9264354	39	10	0.664686	0.666696	0.886795	1
ENSG00000137310.7	TCF19	var_31228186_T_C_rs9264355	39	11	0.676691	0.662052	0.77023	1
ENSG00000137310.7	TCF19	var_31228212_C_T_rs9264356	39	9	0.654936	0.669554	0.682126	0.981771
ENSG00000137310.7	TCF19	var_31228327_A_G_rs9264362	39	10	0.664686	0.666696	0.886795	1
ENSG00000137310.7	TCF19	var_31228430_G_T_rs9264367	39	9	0.654936	0.669554	0.682126	0.981771
ENSG00000137310.7	TCF19	var_31228460_A_G_rs9264368	39	10	0.664686	0.666696	0.886795	1
ENSG00000137310.7	TCF19	var_31228601_A_G_rs9264372	39	10	0.664686	0.666696	0.886795	1
ENSG00000137310.7	TCF19	var_31228666_C_T_rs9264374	39	9	0.654936	0.669554	0.682126	0.981771
ENSG00000137310.7	TCF19	var_31228707_A_C_rs9264375	39	10	0.664686	0.666696	0.886795	1
ENSG00000137310.7	TCF19	var_31228868_T_C_rs3132493	39	9	0.654936	0.669554	0.682126	0.981771
ENSG00000137310.7	TCF19	var_31229041_C_A_rs3130541	39	9	0.654936	0.669554	0.682126	0.981771
ENSG00000137310.7	TCF19	var_31229055_T_C_rs9264384	39	10	0.664686	0.666696	0.886795	1
ENSG00000137310.7	TCF19	var_31229075_GA_G_.	39	9	0.654936	0.669554	0.682126	0.981771
ENSG00000137310.7	TCF19	var_31229130_G_C_rs9264386	39	10	0.664686	0.666696	0.886795	1
ENSG00000137310.7	TCF19	var_31229188_C_T_rs9264388	39	10	0.664686	0.666696	0.886795	1
ENSG00000137310.7	TCF19	var_31229191_G_C_rs9264389	39	9	0.654936	0.669554	0.682126	0.981771
ENSG00000137310.7	TCF19	var_31229196_T_C_rs9264390	39	9	0.654936	0.669554	0.682126	0.981771
ENSG00000137310.7	TCF19	var_31229289_A_G_rs9264395	39	9	0.654936	0.669554	0.682126	0.981771
ENSG00000137310.7	TCF19	var_31229413_C_T_rs9264400	39	10	0.664686	0.666696	0.886795	1
ENSG00000137310.7	TCF19	var_31229444_C_T_rs9264402	39	9	0.654936	0.669554	0.682126	0.981771
ENSG00000137310.7	TCF19	var_31229593_A_C_rs9264405	39	10	0.664686	0.666696	0.886795	1
ENSG00000137310.7	TCF19	var_31229610_A_G_rs9264406	39	10	0.664686	0.666696	0.886795	1
ENSG00000137310.7	TCF19	var_31229669_T_C_rs9264407	39	10	0.664686	0.666696	0.886795	1
ENSG00000137310.7	TCF19	var_31229723_G_A_rs9264408	39	9	0.654936	0.669554	0.682126	0.981771
ENSG00000137310.7	TCF19	var_31229738_A_G_rs9264409	39	10	0.664686	0.666696	0.886795	1
ENSG00000137310.7	TCF19	var_31229775_C_T_rs9264410	39	10	0.664686	0.666696	0.886795	1
ENSG00000137310.7	TCF19	var_31229845_C_T_rs9264411	39	10	0.664686	0.666696	0.886795	1
ENSG00000137310.7	TCF19	var_31229921_G_C_rs9264412	39	10	0.664686	0.666696	0.886795	1
ENSG00000137310.7	TCF19	var_31229930_C_T_rs9264413	39	10	0.664686	0.666696	0.886795	1
ENSG00000137310.7	TCF19	var_31229942_T_C_rs9264414	39	10	0.664686	0.666696	0.886795	1
ENSG00000137310.7	TCF19	var_31230003_TG_T_.	39	9	0.654936	0.669554	0.682126	0.981771
ENSG00000137310.7	TCF19	var_31230042_G_A_rs9264416	39	11	0.676691	0.662052	0.77023	1
ENSG00000137310.7	TCF19	var_31230078_A_G_rs9264417	39	10	0.664686	0.666696	0.886795	1
ENSG00000137310.7	TCF19	var_31230136_T_C_rs2394949	39	9	0.654936	0.669554	0.682126	0.981771
ENSG00000137310.7	TCF19	var_31230174_T_A_rs9264420	39	10	0.664686	0.666696	0.886795	1
ENSG00000137310.7	TCF19	var_31230180_C_A_rs9264421	39	9	0.654936	0.669554	0.682126	0.981771
ENSG00000137310.7	TCF19	var_31230183_C_T_rs9264422	39	9	0.654936	0.669554	0.682126	0.981771
ENSG00000137310.7	TCF19	var_31230216_T_C_rs9264423	39	11	0.676691	0.662052	0.77023	1
ENSG00000137310.7	TCF19	var_31230318_A_G_rs9264425	39	9	0.654936	0.669554	0.682126	0.981771
ENSG00000137310.7	TCF19	var_31230319_C_A_rs9264426	39	9	0.654936	0.669554	0.682126	0.981771
ENSG00000137310.7	TCF19	var_31230356_G_A_rs9264427	39	10	0.664686	0.666696	0.886795	1
ENSG00000137310.7	TCF19	var_31230452_C_A_rs9264428	39	10	0.664686	0.666696	0.886795	1
ENSG00000137310.7	TCF19	var_31230498_G_A_rs9264429	39	9	0.654936	0.669554	0.682126	0.981771
ENSG00000137310.7	TCF19	var_31230605_C_T_rs4995903	39	9	0.654936	0.669554	0.682126	0.981771
ENSG00000137310.7	TCF19	var_31230645_C_T_rs4995902	39	9	0.654936	0.669554	0.682126	0.981771
ENSG00000137310.7	TCF19	var_31230759_A_G_rs2394951	39	10	0.664686	0.666696	0.886795	1
ENSG00000137310.7	TCF19	var_31230882_G_A_rs2394952	39	10	0.664686	0.666696	0.886795	1
ENSG00000137310.7	TCF19	var_31231965_TC_T_rs63034761	39	9	0.654936	0.669554	0.682126	0.981771
ENSG00000137310.7	TCF19	var_31231972_A_G_rs9264474	39	10	0.664686	0.666696	0.886795	1
ENSG00000137310.7	TCF19	var_31232111_A_G_rs3130542	39	10	0.664686	0.666696	0.886795	1
ENSG00000137310.7	TCF19	var_31232147_C_T_rs3130543	39	9	0.654936	0.669554	0.682126	0.981771
ENSG00000137310.7	TCF19	var_31232337_G_GGGAAGATGTGTGAATAATCATTTCACCAT_rs9281293	39	10	0.664686	0.666696	0.886795	1
ENSG00000137310.7	TCF19	var_31232412_T_G_rs9264482	39	10	0.664686	0.666696	0.886795	1
ENSG00000137310.7	TCF19	var_31232446_T_C_rs9264483	39	9	0.654936	0.669554	0.682126	0.981771
ENSG00000137310.7	TCF19	var_31232482_A_T_rs9264486	39	11	0.676691	0.662052	0.77023	1
ENSG00000137310.7	TCF19	var_31232563_C_G_rs9264489	39	10	0.664686	0.666696	0.886795	1
ENSG00000137310.7	TCF19	var_31232697_A_G_rs9264493	39	9	0.654936	0.669554	0.682126	0.981771
ENSG00000137310.7	TCF19	var_31232703_A_G_rs9264494	39	10	0.664686	0.666696	0.886795	1
ENSG00000137310.7	TCF19	var_31232722_C_T_rs9264495	39	9	0.654936	0.669554	0.682126	0.981771
ENSG00000137310.7	TCF19	var_31232723_A_G_rs9264496	39	9	0.654936	0.669554	0.682126	0.981771
ENSG00000137310.7	TCF19	var_31232769_G_A_rs9264497	39	10	0.664686	0.666696	0.886795	1
ENSG00000137310.7	TCF19	var_31232789_A_T_rs9264498	39	10	0.664686	0.666696	0.886795	1
ENSG00000137310.7	TCF19	var_31232825_G_A_rs9264500	39	9	0.654936	0.669554	0.682126	0.981771
ENSG00000137310.7	TCF19	var_31232913_C_T_rs9264502	39	10	0.664686	0.666696	0.886795	1
ENSG00000137310.7	TCF19	var_31233121_T_C_rs9264505	39	10	0.664686	0.666696	0.886795	1
ENSG00000137310.7	TCF19	var_31233143_C_T_rs9264506	39	9	0.654936	0.669554	0.682126	0.981771
ENSG00000137310.7	TCF19	var_31233152_A_G_rs9264507	39	10	0.664686	0.666696	0.886795	1
ENSG00000137310.7	TCF19	var_31233214_T_C_rs9264508	39	10	0.664686	0.666696	0.886795	1
ENSG00000137310.7	TCF19	var_31233232_A_G_.	39	10	0.664686	0.666696	0.886795	1
ENSG00000137310.7	TCF19	var_31233258_G_C_.	39	10	0.664686	0.666696	0.886795	1
ENSG00000137310.7	TCF19	var_31233270_T_G_rs2894202	39	10	0.664686	0.666696	0.886795	1
ENSG00000137310.7	TCF19	var_31233353_G_A_rs2394953	39	9	0.654936	0.669554	0.682126	0.981771
ENSG00000137310.7	TCF19	var_31233395_T_C_rs2394954	39	9	0.654936	0.669554	0.682126	0.981771
ENSG00000137310.7	TCF19	var_31233396_G_A_rs2394955	39	9	0.654936	0.669554	0.682126	0.981771
ENSG00000137310.7	TCF19	var_31233456_C_T_rs2394956	39	10	0.664686	0.666696	0.886795	1
ENSG00000137310.7	TCF19	var_31233521_T_C_rs2394957	39	10	0.664686	0.666696	0.886795	1
ENSG00000137310.7	TCF19	var_31233529_T_C_.	39	10	0.664686	0.666696	0.886795	1
ENSG00000137310.7	TCF19	var_31233532_G_A_rs2894203	39	9	0.654936	0.669554	0.682126	0.981771
ENSG00000137310.7	TCF19	var_31233643_T_C_.	39	9	0.654936	0.669554	0.682126	0.981771
ENSG00000137310.7	TCF19	var_31233758_T_A_rs9264523	39	10	0.664686	0.666696	0.886795	1
ENSG00000137310.7	TCF19	var_31233845_T_G_rs9264524	39	9	0.654936	0.669554	0.682126	0.981771
ENSG00000137310.7	TCF19	var_31234058_A_G_rs9264528	39	9	0.654936	0.669554	0.682126	0.981771
ENSG00000137310.7	TCF19	var_31234074_G_A_rs9264529	39	9	0.654936	0.669554	0.682126	0.981771
ENSG00000137310.7	TCF19	var_31234239_A_T_rs9264531	39	12	0.644127	0.675983	0.312678	0.62722
ENSG00000137310.7	TCF19	var_31234516_CAT_C_rs9279065	39	9	0.654936	0.669554	0.682126	0.981771
ENSG00000137310.7	TCF19	var_31234541_G_A_rs77994113	39	9	0.654936	0.669554	0.682126	0.981771
ENSG00000137310.7	TCF19	var_31234678_G_A_rs9264544	39	9	0.654936	0.669554	0.682126	0.981771
ENSG00000137310.7	TCF19	var_31234771_A_G_rs9264548	39	10	0.664686	0.666696	0.886795	1
ENSG00000137310.7	TCF19	var_31234774_C_G_rs9264549	39	9	0.654936	0.669554	0.682126	0.981771
ENSG00000137310.7	TCF19	var_31234836_C_G_rs9264552	39	10	0.664686	0.666696	0.886795	1
ENSG00000137310.7	TCF19	var_31234851_C_G_rs9264553	39	10	0.664686	0.666696	0.886795	1
ENSG00000137310.7	TCF19	var_31235374_A_G_rs9264567	39	10	0.664686	0.666696	0.886795	1
ENSG00000137310.7	TCF19	var_31235383_T_C_rs9264568	39	9	0.654936	0.669554	0.682126	0.981771
ENSG00000137310.7	TCF19	var_31235412_T_C_rs9264569	39	10	0.664686	0.666696	0.886795	1
ENSG00000137310.7	TCF19	var_31235421_C_T_rs9264570	39	10	0.664686	0.666696	0.886795	1
ENSG00000137310.7	TCF19	var_31235558_A_G_rs6907910	39	10	0.664686	0.666696	0.886795	1
ENSG00000137310.7	TCF19	var_31235576_G_C_rs9264575	39	10	0.664686	0.666696	0.886795	1
ENSG00000137310.7	TCF19	var_31235610_C_A_rs6907622	39	9	0.654936	0.669554	0.682126	0.981771
ENSG00000137310.7	TCF19	var_31235708_C_G_rs9264578	39	9	0.654936	0.669554	0.682126	0.981771
ENSG00000137310.7	TCF19	var_31235786_C_T_rs9264581	39	9	0.654936	0.669554	0.682126	0.981771
ENSG00000137310.7	TCF19	var_31235816_A_G_rs9264582	39	10	0.664686	0.666696	0.886795	1
ENSG00000137310.7	TCF19	var_31236034_T_C_rs9264584	39	17	0.675324	0.659115	0.624001	0.9354
ENSG00000137310.7	TCF19	var_31236853_G_A_rs1065711	39	11	0.676691	0.662052	0.77023	1
ENSG00000137310.7	TCF19	var_31236998_C_T_rs2001181	39	11	0.676691	0.662052	0.77023	1
ENSG00000137310.7	TCF19	var_31239306_T_G_rs7383157	39	12	0.672888	0.6632	0.868963	1
ENSG00000137310.7	TCF19	var_31239722_A_C_rs9264670	39	11	0.676691	0.662052	0.77023	1
ENSG00000137310.7	TCF19	var_31240353_A_C_rs28498059	39	11	0.676691	0.662052	0.77023	1
ENSG00000137310.7	TCF19	var_31240663_T_A_rs9264679	39	11	0.676691	0.662052	0.77023	1
ENSG00000137310.7	TCF19	var_31241270_G_A_rs6900323	39	12	0.683004	0.658704	0.599204	0.904368
ENSG00000137310.7	TCF19	var_31242272_C_T_rs3132491	39	11	0.676691	0.662052	0.77023	1
ENSG00000137310.7	TCF19	var_31243197_A_G_rs3130694	39	11	0.676691	0.662052	0.77023	1
ENSG00000137310.7	TCF19	var_31244068_G_A_rs9264731	39	11	0.676691	0.662052	0.77023	1
ENSG00000137310.7	TCF19	var_31244181_C_T_rs9264732	39	11	0.676691	0.662052	0.77023	1
ENSG00000137310.7	TCF19	var_31244230_A_C_rs9264734	39	11	0.676691	0.662052	0.77023	1
ENSG00000137310.7	TCF19	var_31244247_A_G_rs9264736	39	11	0.676691	0.662052	0.77023	1
ENSG00000137310.7	TCF19	var_31244249_T_C_rs9264737	39	11	0.676691	0.662052	0.77023	1
ENSG00000137310.7	TCF19	var_31244261_C_A_rs9264738	39	11	0.676691	0.662052	0.77023	1
ENSG00000137310.7	TCF19	var_31244300_G_A_rs9264739	39	11	0.676691	0.662052	0.77023	1
ENSG00000137310.7	TCF19	var_31244616_T_C_rs9264742	39	11	0.676691	0.662052	0.77023	1
ENSG00000137310.7	TCF19	var_31244654_A_G_rs3930575	39	11	0.676691	0.662052	0.77023	1
ENSG00000137310.7	TCF19	var_31244960_T_C_rs6919908	39	11	0.676691	0.662052	0.77023	1
ENSG00000137310.7	TCF19	var_31246703_G_A_rs7381988	39	11	0.676691	0.662052	0.77023	1
ENSG00000137310.7	TCF19	var_31247067_T_G_rs7382297	39	11	0.676691	0.662052	0.77023	1
ENSG00000137310.7	TCF19	var_31247149_A_G_rs7382307	39	11	0.676691	0.662052	0.77023	1
ENSG00000137310.7	TCF19	var_31248434_A_G_rs9264758	39	12	0.663492	0.667376	0.892632	1
ENSG00000137310.7	TCF19	var_31248678_T_C_rs9264759	39	12	0.663492	0.667376	0.892632	1
ENSG00000137310.7	TCF19	var_31249196_A_C_rs9264763	39	11	0.676691	0.662052	0.77023	1
ENSG00000137310.7	TCF19	var_31291285_T_C_rs9265259	39	4	0.703082	0.661964	0.40656	0.732252
ENSG00000137310.7	TCF19	var_31312006_T_TG_rs9281363	39	4	0.703082	0.661964	0.40656	0.732252
ENSG00000137310.7	TCF19	var_31321123_G_T_rs2523612	39	4	0.703082	0.661964	0.40656	0.732252
ENSG00000137310.7	TCF19	var_31321360_A_G_rs2844585	39	4	0.703082	0.661964	0.40656	0.732252
ENSG00000137310.7	TCF19	var_31325028_A_G_rs2596489	39	4	0.703082	0.661964	0.40656	0.732252
ENSG00000137310.7	TCF19	var_31325030_T_C_rs2596488	39	4	0.703082	0.661964	0.40656	0.732252
ENSG00000137310.7	TCF19	var_31333032_T_C_rs9266366	39	4	0.703082	0.661964	0.40656	0.732252
ENSG00000137310.7	TCF19	var_31350550_C_A_rs2523532	39	4	0.703082	0.661964	0.40656	0.732252
ENSG00000137310.7	TCF19	var_31355702_G_C_rs2523480	39	4	0.703082	0.661964	0.40656	0.732252
ENSG00000137310.7	TCF19	var_31366472_T_C_rs2853967	39	4	0.703082	0.661964	0.40656	0.732252
ENSG00000137310.7	TCF19	var_31367882_A_G_rs2596540	39	4	0.703082	0.661964	0.40656	0.732252
ENSG00000137310.7	TCF19	var_31380341_A_G_rs2853971	39	4	0.703082	0.661964	0.40656	0.732252
ENSG00000137310.7	TCF19	var_31387157_C_T_rs2516450	39	4	0.703082	0.661964	0.40656	0.732252
ENSG00000137310.7	TCF19	var_31388053_C_T_rs2596533	39	4	0.703082	0.661964	0.40656	0.732252
ENSG00000137310.7	TCF19	var_31393684_A_G_rs3132091	39	4	0.703082	0.661964	0.40656	0.732252
ENSG00000137310.7	TCF19	var_31403518_T_C_rs3093960	39	4	0.703082	0.661964	0.40656	0.732252
ENSG00000137310.7	TCF19	var_31409142_G_C_rs2516469	39	4	0.703082	0.661964	0.40656	0.732252
ENSG00000137310.7	TCF19	var_31437492_C_G_rs2523670	39	6	0.672045	0.665115	0.95464	1
ENSG00000137310.7	TCF19	var_31449327_A_G_rs2905722	39	6	0.672045	0.665115	0.95464	1
ENSG00000137312.10	FLOT1	var_30746633_C_A_rs12526481	25	13	0.552581	0.544227	0.649511	0.956988
ENSG00000137312.10	FLOT1	var_30747216_C_T_rs10947091	25	15	0.554366	0.53988	0.33826	0.653998
ENSG00000137312.10	FLOT1	var_30749712_T_G_rs9468830	25	16	0.551552	0.543272	0.636828	0.948222
ENSG00000137312.10	FLOT1	var_30751136_C_T_rs28894083	25	16	0.551552	0.543272	0.636828	0.948222
ENSG00000137312.10	FLOT1	var_30751244_G_T_rs28894084	25	16	0.551552	0.543272	0.636828	0.948222
ENSG00000137312.10	FLOT1	var_30751277_C_T_rs28894085	25	16	0.551552	0.543272	0.636828	0.948222
ENSG00000137312.10	FLOT1	var_30751326_A_G_rs28894086	25	16	0.551552	0.543272	0.636828	0.948222
ENSG00000137312.10	FLOT1	var_30751539_T_G_rs9468832	25	16	0.551552	0.543272	0.636828	0.948222
ENSG00000137312.10	FLOT1	var_30751662_T_C_rs9461629	24	14	0.548557	0.542092	0.625096	0.936422
ENSG00000137312.10	FLOT1	var_30751663_G_A_rs9468833	24	14	0.548557	0.542092	0.625096	0.936422
ENSG00000137312.10	FLOT1	var_30751723_C_T_rs9461630	25	16	0.551552	0.543272	0.636828	0.948222
ENSG00000137312.10	FLOT1	var_30752184_T_C_rs9295912	25	16	0.551552	0.543272	0.636828	0.948222
ENSG00000137312.10	FLOT1	var_30752415_C_T_rs9461631	25	16	0.551552	0.543272	0.636828	0.948222
ENSG00000137312.10	FLOT1	var_30752489_C_G_rs13207758	25	16	0.551552	0.543272	0.636828	0.948222
ENSG00000137312.10	FLOT1	var_30752552_T_C_rs28894089	25	16	0.551552	0.543272	0.636828	0.948222
ENSG00000137312.10	FLOT1	var_30752988_A_G_rs13211218	25	16	0.551552	0.543272	0.636828	0.948222
ENSG00000137312.10	FLOT1	var_30753146_A_G_rs4713360	25	16	0.551552	0.543272	0.636828	0.948222
ENSG00000137312.10	FLOT1	var_30754411_G_GT_rs112064948	25	16	0.551552	0.543272	0.636828	0.948222
ENSG00000137312.10	FLOT1	var_30754540_C_T_rs12527415	25	16	0.551552	0.543272	0.636828	0.948222
ENSG00000137312.10	FLOT1	var_30754614_C_T_rs12527745	25	16	0.551552	0.543272	0.636828	0.948222
ENSG00000137312.10	FLOT1	var_30754642_A_T_rs13196596	25	16	0.551552	0.543272	0.636828	0.948222
ENSG00000137312.10	FLOT1	var_30754982_A_G_rs13197105	25	16	0.551552	0.543272	0.636828	0.948222
ENSG00000137312.10	FLOT1	var_30755014_A_G_rs13197117	25	16	0.551552	0.543272	0.636828	0.948222
ENSG00000137312.10	FLOT1	var_30755320_T_C_rs13213720	25	16	0.551552	0.543272	0.636828	0.948222
ENSG00000137312.10	FLOT1	var_30755472_A_G_rs4713362	25	16	0.551552	0.543272	0.636828	0.948222
ENSG00000137312.10	FLOT1	var_30755591_C_A_rs28780115	25	16	0.551552	0.543272	0.636828	0.948222
ENSG00000137312.10	FLOT1	var_30755612_TA_T_rs369059746	25	13	0.547729	0.549484	0.936162	1
ENSG00000137312.10	FLOT1	var_30755617_TAAAATAAAATAAAATA_T_.	25	13	0.547729	0.549484	0.936162	1
ENSG00000137312.10	FLOT1	var_30755668_G_C_rs28780116	24	15	0.55163	0.543272	0.639899	0.951839
ENSG00000137312.10	FLOT1	var_30755744_C_A_rs16897899	25	16	0.551552	0.543272	0.636828	0.948222
ENSG00000137312.10	FLOT1	var_30755788_T_C_rs28780117	25	16	0.551552	0.543272	0.636828	0.948222
ENSG00000137312.10	FLOT1	var_30755789_C_T_.	25	16	0.551552	0.543272	0.636828	0.948222
ENSG00000137312.10	FLOT1	var_30755863_G_T_rs28780119	25	16	0.551552	0.543272	0.636828	0.948222
ENSG00000137312.10	FLOT1	var_30755893_C_A_rs16897900	25	16	0.551552	0.543272	0.636828	0.948222
ENSG00000137312.10	FLOT1	var_30756066_G_A_rs13201769	25	16	0.551552	0.543272	0.636828	0.948222
ENSG00000137312.10	FLOT1	var_30756140_G_A_rs13201901	25	16	0.551552	0.543272	0.636828	0.948222
ENSG00000137312.10	FLOT1	var_30756183_C_T_rs4713365	25	16	0.551552	0.543272	0.636828	0.948222
ENSG00000137312.10	FLOT1	var_30756274_A_T_rs4711228	25	16	0.551552	0.543272	0.636828	0.948222
ENSG00000137312.10	FLOT1	var_30756361_C_T_rs4713366	25	16	0.551552	0.543272	0.636828	0.948222
ENSG00000137312.10	FLOT1	var_30756593_C_T_rs6920124	25	16	0.551552	0.543272	0.636828	0.948222
ENSG00000137312.10	FLOT1	var_30756596_T_C_rs6900029	25	16	0.551552	0.543272	0.636828	0.948222
ENSG00000137312.10	FLOT1	var_30756744_G_T_rs4711229	25	16	0.551552	0.543272	0.636828	0.948222
ENSG00000137312.10	FLOT1	var_30756822_G_A_rs4713367	25	16	0.551552	0.543272	0.636828	0.948222
ENSG00000137312.10	FLOT1	var_30757046_T_C_rs4711230	25	16	0.551552	0.543272	0.636828	0.948222
ENSG00000137312.10	FLOT1	var_30757047_C_T_rs4713368	25	16	0.551552	0.543272	0.636828	0.948222
ENSG00000137312.10	FLOT1	var_30757188_C_A_rs13206009	25	16	0.551552	0.543272	0.636828	0.948222
ENSG00000137312.10	FLOT1	var_30757575_C_T_rs10947095	25	16	0.551552	0.543272	0.636828	0.948222
ENSG00000137312.10	FLOT1	var_30758126_A_T_rs13210146	25	16	0.551552	0.543272	0.636828	0.948222
ENSG00000137312.10	FLOT1	var_30758348_C_T_rs11758688	25	16	0.551552	0.543272	0.636828	0.948222
ENSG00000137312.10	FLOT1	var_30758707_C_G_rs9295914	25	16	0.551552	0.543272	0.636828	0.948222
ENSG00000137312.10	FLOT1	var_30760454_G_T_rs7774646	25	6	0.555174	0.546486	0.687047	0.987327
ENSG00000137312.10	FLOT1	var_30761129_A_G_rs4713369	25	7	0.548628	0.54855	0.929395	1
ENSG00000137312.10	FLOT1	var_30761168_A_G_rs9461633	25	7	0.548628	0.54855	0.929395	1
ENSG00000137312.10	FLOT1	var_31082404_C_T_rs3130980	25	11	0.559231	0.540196	0.183239	0.455414
ENSG00000137312.10	FLOT1	var_31834138_GCACT_G_.	25	2	0.544038	0.548966	1	1
ENSG00000137312.10	FLOT1	var_32798647_A_T_rs56294406	25	4	0.540283	0.55015	0.694545	0.996194
ENSG00000137312.10	FLOT1	var_32802138_C_T_rs78738489	25	4	0.540283	0.55015	0.694545	0.996194
ENSG00000137312.10	FLOT1	var_32802154_C_A_rs79595056	25	4	0.540283	0.55015	0.694545	0.996194
ENSG00000137411.12	VARS2	var_28678357_T_C_rs7775835	157	34	0.616468	0.60753	0.15774	0.409534
ENSG00000137411.12	VARS2	var_28682725_G_A_rs9393926	157	28	0.616242	0.607995	0.114173	0.333313
ENSG00000137411.12	VARS2	var_28696063_A_C_rs9393929	157	28	0.616242	0.607995	0.114173	0.333313
ENSG00000137411.12	VARS2	var_28701492_G_C_rs6456835	157	28	0.616242	0.607995	0.114173	0.333313
ENSG00000137411.12	VARS2	var_28705074_G_T_rs1311911	157	28	0.616242	0.607995	0.114173	0.333313
ENSG00000137411.12	VARS2	var_28832788_A_G_.	157	27	0.617023	0.607896	0.0856525	0.276625
ENSG00000137411.12	VARS2	var_29283672_C_T_rs3129682	157	24	0.624531	0.606747	0.00334579	0.0315157
ENSG00000137411.12	VARS2	var_29335154_T_C_rs9257793	157	30	0.615667	0.608001	0.132995	0.36405
ENSG00000137411.12	VARS2	var_29340743_C_T_rs9257800	157	23	0.625445	0.606723	0.00269241	0.0263021
ENSG00000137411.12	VARS2	var_29344395_C_T_rs9257803	157	29	0.616214	0.607937	0.118097	0.339796
ENSG00000137411.12	VARS2	var_29346329_A_G_rs9257805	157	29	0.616214	0.607937	0.118097	0.339796
ENSG00000137411.12	VARS2	var_29356331_A_G_rs9257809	157	23	0.625445	0.606723	0.00269241	0.0263021
ENSG00000137411.12	VARS2	var_29356687_G_T_rs442694	157	23	0.625445	0.606723	0.00269241	0.0263021
ENSG00000137411.12	VARS2	var_29372323_A_G_rs429479	157	24	0.62336	0.606958	0.0073536	0.0473155
ENSG00000137411.12	VARS2	var_29375802_T_C_rs437955	157	24	0.62336	0.606958	0.0073536	0.0473155
ENSG00000137411.12	VARS2	var_29376385_C_G_rs406511	157	24	0.62336	0.606958	0.0073536	0.0473155
ENSG00000137411.12	VARS2	var_29411432_T_C_rs1535039	157	23	0.625445	0.606723	0.00269241	0.0263021
ENSG00000137411.12	VARS2	var_29415464_C_A_rs2523443	157	23	0.625445	0.606723	0.00269241	0.0263021
ENSG00000137411.12	VARS2	var_29432173_A_T_rs2143668	157	23	0.625445	0.606723	0.00269241	0.0263021
ENSG00000137411.12	VARS2	var_29435355_T_C_rs2746149	157	25	0.622023	0.607087	0.0112312	0.0680944
ENSG00000137411.12	VARS2	var_29437033_C_T_rs2206853	157	24	0.623569	0.606921	0.00598353	0.0407593
ENSG00000137411.12	VARS2	var_29442701_C_T_rs2746150	157	23	0.625445	0.606723	0.00269241	0.0263021
ENSG00000137411.12	VARS2	var_29452136_T_G_rs1234844	157	23	0.625445	0.606723	0.00269241	0.0263021
ENSG00000137411.12	VARS2	var_29453219_T_C_rs1233494	157	24	0.623569	0.606921	0.00598353	0.0407593
ENSG00000137411.12	VARS2	var_29458241_A_G_rs1233493	157	25	0.622023	0.607087	0.0112312	0.0680944
ENSG00000137411.12	VARS2	var_29461730_G_C_rs1233491	157	23	0.625445	0.606723	0.00269241	0.0263021
ENSG00000137411.12	VARS2	var_29463043_T_A_rs1233489	157	23	0.625445	0.606723	0.00269241	0.0263021
ENSG00000137411.12	VARS2	var_29467719_G_A_rs1233488	157	23	0.625445	0.606723	0.00269241	0.0263021
ENSG00000137411.12	VARS2	var_29477414_C_T_rs1233480	157	28	0.617672	0.607684	0.0662839	0.233189
ENSG00000137411.12	VARS2	var_29480224_G_A_rs385816	157	30	0.615047	0.608147	0.173981	0.440298
ENSG00000137411.12	VARS2	var_29483620_A_T_rs3094569	157	30	0.615047	0.608147	0.173981	0.440298
ENSG00000137411.12	VARS2	var_29484110_G_A_rs2523432	157	29	0.616241	0.607931	0.118097	0.339796
ENSG00000137411.12	VARS2	var_29484215_G_T_rs2523431	157	23	0.625445	0.606723	0.00269241	0.0263021
ENSG00000137411.12	VARS2	var_29519554_G_T_rs408623	157	24	0.624564	0.606741	0.00329359	0.0311104
ENSG00000137411.12	VARS2	var_29521445_C_T_rs389419	157	24	0.624564	0.606741	0.00329359	0.0311104
ENSG00000137411.12	VARS2	var_29523957_A_G_rs404240	157	24	0.624564	0.606741	0.00329359	0.0311104
ENSG00000137411.12	VARS2	var_29526562_G_A_rs413670	157	24	0.624564	0.606741	0.00329359	0.0311104
ENSG00000137411.12	VARS2	var_29537224_A_G_rs1235162	157	25	0.622767	0.606946	0.00748306	0.0480481
ENSG00000137411.12	VARS2	var_29546799_G_A_rs1233396	157	32	0.614795	0.608101	0.169201	0.433794
ENSG00000137411.12	VARS2	var_29548089_G_A_rs926552	157	32	0.614795	0.608101	0.169201	0.433794
ENSG00000137411.12	VARS2	var_29549653_C_G_rs1233393	157	25	0.622767	0.606946	0.00748306	0.0480481
ENSG00000137411.12	VARS2	var_29559238_T_C_rs1233385	157	25	0.622767	0.606946	0.00748306	0.0480481
ENSG00000137411.12	VARS2	var_29607101_T_C_rs3131856	157	25	0.622767	0.606946	0.00748306	0.0480481
ENSG00000137411.12	VARS2	var_29659255_C_A_rs3131894	157	25	0.622767	0.606946	0.00748306	0.0480481
ENSG00000137411.12	VARS2	var_29660816_C_A_rs3116813	157	24	0.623295	0.60697	0.00724712	0.0471448
ENSG00000137411.12	VARS2	var_29718790_G_A_rs1610621	157	59	0.610139	0.60906	0.608065	0.91508
ENSG00000137411.12	VARS2	var_29725295_G_T_rs1737077	157	57	0.610656	0.608787	0.524143	0.837102
ENSG00000137411.12	VARS2	var_29726046_C_T_rs1633063	157	57	0.610656	0.608787	0.524143	0.837102
ENSG00000137411.12	VARS2	var_29728570_G_T_rs1610629	157	57	0.610656	0.608787	0.524143	0.837102
ENSG00000137411.12	VARS2	var_29729924_C_G_rs1610729	157	57	0.610656	0.608787	0.524143	0.837102
ENSG00000137411.12	VARS2	var_29730185_G_A_rs1610633	157	57	0.610656	0.608787	0.524143	0.837102
ENSG00000137411.12	VARS2	var_29752808_A_G_rs9258375	157	26	0.620916	0.607193	0.0178769	0.095165
ENSG00000137411.12	VARS2	var_29905437_A_T_rs3098023	151	23	0.63245	0.605586	0.00422181	0.0316931
ENSG00000137411.12	VARS2	var_29970960_G_C_rs3094146	157	27	0.62879	0.605452	0.00702535	0.0457585
ENSG00000137411.12	VARS2	var_29986324_T_A_rs3115631	157	27	0.62879	0.605452	0.00702535	0.0457585
ENSG00000137411.12	VARS2	var_30032522_A_C_rs8321	157	27	0.62879	0.605452	0.00702535	0.0457585
ENSG00000137411.12	VARS2	var_30038647_T_C_rs9261290	157	27	0.62879	0.605452	0.00702535	0.0457585
ENSG00000137411.12	VARS2	var_30055930_GA_G_.	157	27	0.62879	0.605452	0.00702535	0.0457585
ENSG00000137411.12	VARS2	var_30063652_G_C_rs1264706	157	27	0.62879	0.605452	0.00702535	0.0457585
ENSG00000137411.12	VARS2	var_30063674_G_C_rs1264705	157	27	0.62879	0.605452	0.00702535	0.0457585
ENSG00000137411.12	VARS2	var_30074072_G_C_rs2517601	157	28	0.627104	0.605637	0.0165782	0.0914027
ENSG00000137411.12	VARS2	var_30075613_T_C_rs2023473	157	25	0.629516	0.605668	0.0103412	0.0637527
ENSG00000137411.12	VARS2	var_30083708_C_T_rs2523978	157	24	0.629678	0.605818	0.013487	0.078431
ENSG00000137411.12	VARS2	var_30088743_G_A_rs2844791	157	36	0.624766	0.604913	0.0182111	0.0965652
ENSG00000137411.12	VARS2	var_30112795_G_A_rs2844789	157	25	0.629516	0.605668	0.0103412	0.0637527
ENSG00000137411.12	VARS2	var_30122623_T_C_rs2517645	157	35	0.623605	0.605409	0.00943628	0.0586382
ENSG00000137411.12	VARS2	var_30122657_C_G_rs2523735	157	29	0.627058	0.60548	0.0103932	0.0640356
ENSG00000137411.12	VARS2	var_30125543_C_T_rs1970	157	25	0.629516	0.605668	0.0103412	0.0637527
ENSG00000137411.12	VARS2	var_30127805_A_G_rs1573296	157	25	0.629516	0.605668	0.0103412	0.0637527
ENSG00000137411.12	VARS2	var_30128949_G_T_rs2157678	157	25	0.629516	0.605668	0.0103412	0.0637527
ENSG00000137411.12	VARS2	var_30137209_G_A_rs929157	157	26	0.624764	0.606429	0.0379509	0.157843
ENSG00000137411.12	VARS2	var_30137387_G_A_rs2523729	157	24	0.629678	0.605818	0.013487	0.078431
ENSG00000137411.12	VARS2	var_30147230_T_G_rs2844785	157	26	0.624764	0.606429	0.0379509	0.157843
ENSG00000137411.12	VARS2	var_30152467_G_T_rs11158	157	24	0.629678	0.605818	0.013487	0.078431
ENSG00000137411.12	VARS2	var_30153363_G_A_rs2106072	157	24	0.629678	0.605818	0.013487	0.078431
ENSG00000137411.12	VARS2	var_30155149_G_C_rs2517622	157	24	0.629678	0.605818	0.013487	0.078431
ENSG00000137411.12	VARS2	var_30158127_G_A_rs2517618	157	26	0.624764	0.606429	0.0379509	0.157843
ENSG00000137411.12	VARS2	var_30161536_G_A_rs2517617	157	24	0.629678	0.605818	0.013487	0.078431
ENSG00000137411.12	VARS2	var_30162505_G_A_rs2517615	157	26	0.624764	0.606429	0.0379509	0.157843
ENSG00000137411.12	VARS2	var_30163955_G_A_rs2517614	157	41	0.609967	0.609289	0.979277	1
ENSG00000137411.12	VARS2	var_30165273_C_T_rs2523722	157	41	0.609967	0.609289	0.979277	1
ENSG00000137411.12	VARS2	var_30165662_G_A_rs2517613	157	26	0.624764	0.606429	0.0379509	0.157843
ENSG00000137411.12	VARS2	var_30166266_C_T_rs2523721	157	45	0.61012	0.609203	0.92423	1
ENSG00000137411.12	VARS2	var_30166886_C_T_rs2523720	157	26	0.624764	0.606429	0.0379509	0.157843
ENSG00000137411.12	VARS2	var_30167404_GT_G_.	157	35	0.615155	0.607833	0.0797148	0.260759
ENSG00000137411.12	VARS2	var_30167418_GT_G_rs376808494	155	38	0.613398	0.608092	0.440356	0.760156
ENSG00000137411.12	VARS2	var_30167835_C_T_rs2428503	157	41	0.609967	0.609289	0.979277	1
ENSG00000137411.12	VARS2	var_30168319_G_T_rs2523719	157	30	0.623021	0.606263	0.035279	0.151461
ENSG00000137411.12	VARS2	var_30169092_A_G_rs2517612	157	28	0.621968	0.606752	0.0973853	0.303755
ENSG00000137411.12	VARS2	var_30169327_A_G_rs2517611	157	41	0.610658	0.609044	0.877727	1
ENSG00000137411.12	VARS2	var_30169475_T_C_rs2284166	157	45	0.61075	0.60895	0.784334	1
ENSG00000137411.12	VARS2	var_30169932_GA_G_.	157	45	0.61075	0.60895	0.784334	1
ENSG00000137411.12	VARS2	var_30170280_A_G_rs2517610	157	45	0.61075	0.60895	0.784334	1
ENSG00000137411.12	VARS2	var_30170287_A_G_rs2517609	157	24	0.629678	0.605818	0.013487	0.078431
ENSG00000137411.12	VARS2	var_30170510_T_C_rs1117490	157	45	0.61075	0.60895	0.784334	1
ENSG00000137411.12	VARS2	var_30170525_C_T_rs2523716	157	45	0.61075	0.60895	0.784334	1
ENSG00000137411.12	VARS2	var_30170628_T_TA_.	157	41	0.610658	0.609044	0.877727	1
ENSG00000137411.12	VARS2	var_30170906_G_T_rs1117488	157	44	0.610786	0.608951	0.800971	1
ENSG00000137411.12	VARS2	var_30170970_A_G_rs1117487	157	45	0.61075	0.60895	0.784334	1
ENSG00000137411.12	VARS2	var_30171284_C_T_rs2523715	157	28	0.621968	0.606752	0.0973853	0.303755
ENSG00000137411.12	VARS2	var_30171369_G_T_rs2523714	157	45	0.61075	0.60895	0.784334	1
ENSG00000137411.12	VARS2	var_30171417_C_T_rs2517608	157	45	0.61075	0.60895	0.784334	1
ENSG00000137411.12	VARS2	var_30171827_T_C_rs2844776	157	45	0.61075	0.60895	0.784334	1
ENSG00000137411.12	VARS2	var_30172513_A_C_rs971570	157	44	0.608344	0.609902	0.985968	1
ENSG00000137411.12	VARS2	var_30172571_CA_C_.	157	47	0.607914	0.610129	0.798815	1
ENSG00000137411.12	VARS2	var_30173330_G_A_rs2523713	157	45	0.61075	0.60895	0.784334	1
ENSG00000137411.12	VARS2	var_30173538_G_A_rs2523712	157	24	0.629678	0.605818	0.013487	0.078431
ENSG00000137411.12	VARS2	var_30174131_C_T_rs2021722	157	45	0.61075	0.60895	0.784334	1
ENSG00000137411.12	VARS2	var_30174428_A_T_rs885913	157	28	0.621968	0.606752	0.0973853	0.303755
ENSG00000137411.12	VARS2	var_30174633_C_A_rs885912	157	45	0.61075	0.60895	0.784334	1
ENSG00000137411.12	VARS2	var_30177939_G_A_rs3129695	157	28	0.621968	0.606752	0.0973853	0.303755
ENSG00000137411.12	VARS2	var_30181567_T_TC_.	157	28	0.621968	0.606752	0.0973853	0.303755
ENSG00000137411.12	VARS2	var_30181883_G_A_rs2188100	157	28	0.621968	0.606752	0.0973853	0.303755
ENSG00000137411.12	VARS2	var_30186630_GGT_G_.	157	28	0.621968	0.606752	0.0973853	0.303755
ENSG00000137411.12	VARS2	var_30202571_C_T_rs885916	157	28	0.621968	0.606752	0.0973853	0.303755
ENSG00000137411.12	VARS2	var_30204008_T_C_rs2517589	157	28	0.621968	0.606752	0.0973853	0.303755
ENSG00000137411.12	VARS2	var_30204247_A_T_rs2844781	157	24	0.629678	0.605818	0.013487	0.078431
ENSG00000137411.12	VARS2	var_30204399_C_G_rs2523742	157	28	0.621968	0.606752	0.0973853	0.303755
ENSG00000137411.12	VARS2	var_30206014_G_A_rs2844777	157	24	0.629678	0.605818	0.013487	0.078431
ENSG00000137411.12	VARS2	var_30207360_T_TA_.	157	28	0.623901	0.606332	0.0379915	0.157843
ENSG00000137411.12	VARS2	var_30207495_C_A_rs2844773	157	28	0.623901	0.606332	0.0379915	0.157843
ENSG00000137411.12	VARS2	var_30208791_TATTA_T_.	157	28	0.623901	0.606332	0.0379915	0.157843
ENSG00000137411.12	VARS2	var_30208843_G_A_rs2844771	157	28	0.623901	0.606332	0.0379915	0.157843
ENSG00000137411.12	VARS2	var_30209918_A_G_rs2188099	157	28	0.623901	0.606332	0.0379915	0.157843
ENSG00000137411.12	VARS2	var_30210550_C_A_rs2844770	157	28	0.623901	0.606332	0.0379915	0.157843
ENSG00000137411.12	VARS2	var_30211617_TA_T_.	157	25	0.626629	0.606215	0.0407478	0.166724
ENSG00000137411.12	VARS2	var_30213540_A_T_rs2022083	157	28	0.623901	0.606332	0.0379915	0.157843
ENSG00000137411.12	VARS2	var_30214250_G_C_rs3129696	157	28	0.623901	0.606332	0.0379915	0.157843
ENSG00000137411.12	VARS2	var_30223428_C_T_rs2189373	157	32	0.61841	0.607176	0.0832584	0.269601
ENSG00000137411.12	VARS2	var_30224970_T_A_rs3094078	157	24	0.629678	0.605818	0.013487	0.078431
ENSG00000137411.12	VARS2	var_30226305_C_T_rs3094076	157	28	0.623901	0.606332	0.0379915	0.157843
ENSG00000137411.12	VARS2	var_30229267_G_C_rs3094075	157	24	0.629678	0.605818	0.013487	0.078431
ENSG00000137411.12	VARS2	var_30230768_A_T_rs3130399	157	24	0.629678	0.605818	0.013487	0.078431
ENSG00000137411.12	VARS2	var_30231285_AC_A_rs370516808	157	28	0.623901	0.606332	0.0379915	0.157843
ENSG00000137411.12	VARS2	var_30232953_G_A_rs3094629	157	28	0.623901	0.606332	0.0379915	0.157843
ENSG00000137411.12	VARS2	var_30234700_T_C_rs3129704	157	28	0.623901	0.606332	0.0379915	0.157843
ENSG00000137411.12	VARS2	var_30234945_A_G_rs3129836	157	28	0.623901	0.606332	0.0379915	0.157843
ENSG00000137411.12	VARS2	var_30248711_G_A_rs3129830	157	24	0.629678	0.605818	0.013487	0.078431
ENSG00000137411.12	VARS2	var_30251391_C_T_rs3094069	157	24	0.629678	0.605818	0.013487	0.078431
ENSG00000137411.12	VARS2	var_30256936_C_T_rs1264622	157	38	0.62011	0.606067	0.0636747	0.229126
ENSG00000137411.12	VARS2	var_30278745_C_T_rs3094066	157	24	0.629678	0.605818	0.013487	0.078431
ENSG00000137411.12	VARS2	var_30279074_C_G_rs1264587	157	42	0.619309	0.605871	0.0547011	0.204818
ENSG00000137411.12	VARS2	var_30279130_G_A_rs3130380	157	24	0.629678	0.605818	0.013487	0.078431
ENSG00000137411.12	VARS2	var_30285312_G_C_rs3094628	157	24	0.629678	0.605818	0.013487	0.078431
ENSG00000137411.12	VARS2	var_30287777_A_G_rs3132651	157	24	0.629678	0.605818	0.013487	0.078431
ENSG00000137411.12	VARS2	var_30296253_G_A_rs3094064	157	24	0.629678	0.605818	0.013487	0.078431
ENSG00000137411.12	VARS2	var_30299245_T_G_rs3094067	157	24	0.629678	0.605818	0.013487	0.078431
ENSG00000137411.12	VARS2	var_30305993_CTT_C_rs377476390	157	24	0.629678	0.605818	0.013487	0.078431
ENSG00000137411.12	VARS2	var_30312176_A_G_rs3132650	157	28	0.623901	0.606332	0.0379915	0.157843
ENSG00000137411.12	VARS2	var_30318327_G_A_rs3130355	157	24	0.629678	0.605818	0.013487	0.078431
ENSG00000137411.12	VARS2	var_30319154_A_T_rs3130364	157	24	0.629678	0.605818	0.013487	0.078431
ENSG00000137411.12	VARS2	var_30321057_G_A_rs3132649	157	25	0.628524	0.605856	0.0179081	0.0952992
ENSG00000137411.12	VARS2	var_30321189_A_C_rs3094061	157	26	0.626674	0.60605	0.0326165	0.146645
ENSG00000137411.12	VARS2	var_30321336_C_T_rs3130374	157	26	0.626674	0.60605	0.0326165	0.146645
ENSG00000137411.12	VARS2	var_30321482_T_C_rs3094627	157	26	0.626674	0.60605	0.0326165	0.146645
ENSG00000137411.12	VARS2	var_30321732_C_A_rs3130375	157	25	0.628524	0.605856	0.0179081	0.0952992
ENSG00000137411.12	VARS2	var_30322931_GT_G_.	157	26	0.626674	0.60605	0.0326165	0.146645
ENSG00000137411.12	VARS2	var_30323109_G_A_rs3130376	157	26	0.626674	0.60605	0.0326165	0.146645
ENSG00000137411.12	VARS2	var_30323110_A_C_rs3094060	157	26	0.626674	0.60605	0.0326165	0.146645
ENSG00000137411.12	VARS2	var_30323393_C_T_rs3130377	157	24	0.629678	0.605818	0.013487	0.078431
ENSG00000137411.12	VARS2	var_30323976_A_AT_.	157	33	0.621714	0.606206	0.0876002	0.27989
ENSG00000137411.12	VARS2	var_30326368_GA_G_.	157	24	0.629678	0.605818	0.013487	0.078431
ENSG00000137411.12	VARS2	var_30326727_TA_T_rs56722471	157	24	0.629678	0.605818	0.013487	0.078431
ENSG00000137411.12	VARS2	var_30326804_T_A_rs3094625	157	24	0.629678	0.605818	0.013487	0.078431
ENSG00000137411.12	VARS2	var_30326809_T_A_rs3094624	157	24	0.629678	0.605818	0.013487	0.078431
ENSG00000137411.12	VARS2	var_30327194_G_A_rs3094059	157	24	0.629678	0.605818	0.013487	0.078431
ENSG00000137411.12	VARS2	var_30327196_G_A_rs3094058	157	24	0.629678	0.605818	0.013487	0.078431
ENSG00000137411.12	VARS2	var_30327839_G_T_rs3130350	157	24	0.629678	0.605818	0.013487	0.078431
ENSG00000137411.12	VARS2	var_30327952_A_G_rs3094622	157	33	0.621714	0.606206	0.0876002	0.27989
ENSG00000137411.12	VARS2	var_30328192_C_T_rs3130351	157	24	0.629678	0.605818	0.013487	0.078431
ENSG00000137411.12	VARS2	var_30328357_C_T_rs3130352	157	24	0.629678	0.605818	0.013487	0.078431
ENSG00000137411.12	VARS2	var_30328753_T_C_rs3094621	157	33	0.621714	0.606206	0.0876002	0.27989
ENSG00000137411.12	VARS2	var_30329552_T_TTA_.	157	24	0.629678	0.605818	0.013487	0.078431
ENSG00000137411.12	VARS2	var_30329926_A_T_rs3094620	157	24	0.629678	0.605818	0.013487	0.078431
ENSG00000137411.12	VARS2	var_30329966_G_A_rs3094057	157	24	0.629678	0.605818	0.013487	0.078431
ENSG00000137411.12	VARS2	var_30330071_G_A_rs3094056	157	24	0.629678	0.605818	0.013487	0.078431
ENSG00000137411.12	VARS2	var_30330392_C_G_rs3132648	157	24	0.629678	0.605818	0.013487	0.078431
ENSG00000137411.12	VARS2	var_30330737_A_G_rs3132647	157	24	0.629678	0.605818	0.013487	0.078431
ENSG00000137411.12	VARS2	var_30331216_A_T_rs3130353	157	24	0.629678	0.605818	0.013487	0.078431
ENSG00000137411.12	VARS2	var_30335621_A_G_rs3129809	157	26	0.627331	0.60592	0.0244423	0.120109
ENSG00000137411.12	VARS2	var_30336663_T_C_rs114200269	157	24	0.629678	0.605818	0.013487	0.078431
ENSG00000137411.12	VARS2	var_30337141_G_T_rs3129810	157	24	0.629678	0.605818	0.013487	0.078431
ENSG00000137411.12	VARS2	var_30337974_G_A_rs3129812	157	24	0.629678	0.605818	0.013487	0.078431
ENSG00000137411.12	VARS2	var_30340528_G_A_rs3129815	157	24	0.629678	0.605818	0.013487	0.078431
ENSG00000137411.12	VARS2	var_30340827_A_G_rs3130363	157	26	0.627331	0.60592	0.0244423	0.120109
ENSG00000137411.12	VARS2	var_30341390_A_G_rs3130365	157	24	0.629678	0.605818	0.013487	0.078431
ENSG00000137411.12	VARS2	var_30341471_T_C_rs3132638	157	26	0.627331	0.60592	0.0244423	0.120109
ENSG00000137411.12	VARS2	var_30342966_G_T_rs3129818	157	26	0.627331	0.60592	0.0244423	0.120109
ENSG00000137411.12	VARS2	var_30343272_A_C_rs3132634	157	25	0.627359	0.606077	0.0325787	0.146645
ENSG00000137411.12	VARS2	var_30343569_G_A_rs3129820	157	26	0.627331	0.60592	0.0244423	0.120109
ENSG00000137411.12	VARS2	var_30344038_G_A_rs3129821	157	26	0.627331	0.60592	0.0244423	0.120109
ENSG00000137411.12	VARS2	var_30344645_C_T_rs3132631	157	26	0.627331	0.60592	0.0244423	0.120109
ENSG00000137411.12	VARS2	var_30345118_C_T_rs3132630	157	26	0.627331	0.60592	0.0244423	0.120109
ENSG00000137411.12	VARS2	var_30345294_A_G_rs3130370	157	26	0.627331	0.60592	0.0244423	0.120109
ENSG00000137411.12	VARS2	var_30346009_A_G_rs3130372	157	26	0.627331	0.60592	0.0244423	0.120109
ENSG00000137411.12	VARS2	var_30346208_G_T_rs3129822	157	26	0.627331	0.60592	0.0244423	0.120109
ENSG00000137411.12	VARS2	var_30346760_T_A_rs3132627	157	24	0.629678	0.605818	0.013487	0.078431
ENSG00000137411.12	VARS2	var_30347186_G_A_rs3129823	157	26	0.627331	0.60592	0.0244423	0.120109
ENSG00000137411.12	VARS2	var_30347720_A_G_rs3132625	157	26	0.627331	0.60592	0.0244423	0.120109
ENSG00000137411.12	VARS2	var_30351348_T_C_rs3094712	157	24	0.629678	0.605818	0.013487	0.078431
ENSG00000137411.12	VARS2	var_30351547_G_A_rs3094032	157	26	0.627331	0.60592	0.0244423	0.120109
ENSG00000137411.12	VARS2	var_30351844_G_A_rs3094031	157	26	0.627331	0.60592	0.0244423	0.120109
ENSG00000137411.12	VARS2	var_30352647_G_A_rs3130123	157	26	0.627331	0.60592	0.0244423	0.120109
ENSG00000137411.12	VARS2	var_30352875_G_A_rs3130125	157	26	0.627331	0.60592	0.0244423	0.120109
ENSG00000137411.12	VARS2	var_30353426_G_A_rs3094030	157	26	0.627331	0.60592	0.0244423	0.120109
ENSG00000137411.12	VARS2	var_30353739_C_A_rs3130126	157	26	0.627331	0.60592	0.0244423	0.120109
ENSG00000137411.12	VARS2	var_30354416_T_TA_rs141748163	157	26	0.627331	0.60592	0.0244423	0.120109
ENSG00000137411.12	VARS2	var_30354913_C_CA_rs202228322	157	24	0.629678	0.605818	0.013487	0.078431
ENSG00000137411.12	VARS2	var_30355184_A_G_rs3094053	157	26	0.627331	0.60592	0.0244423	0.120109
ENSG00000137411.12	VARS2	var_30357294_C_T_rs3094704	157	24	0.629678	0.605818	0.013487	0.078431
ENSG00000137411.12	VARS2	var_30358591_A_G_rs3094050	157	26	0.627331	0.60592	0.0244423	0.120109
ENSG00000137411.12	VARS2	var_30358957_C_T_rs3094703	157	26	0.627331	0.60592	0.0244423	0.120109
ENSG00000137411.12	VARS2	var_30359360_G_A_rs3094049	157	26	0.627331	0.60592	0.0244423	0.120109
ENSG00000137411.12	VARS2	var_30363085_G_C_rs3094036	157	24	0.629678	0.605818	0.013487	0.078431
ENSG00000137411.12	VARS2	var_30363136_G_T_rs3094035	157	26	0.627331	0.60592	0.0244423	0.120109
ENSG00000137411.12	VARS2	var_30363351_A_T_rs3094034	157	24	0.629678	0.605818	0.013487	0.078431
ENSG00000137411.12	VARS2	var_30365448_T_C_rs3130116	157	25	0.630329	0.605514	0.00686486	0.04483
ENSG00000137411.12	VARS2	var_30365629_C_T_rs11961853	157	50	0.614925	0.606914	0.370869	0.696703
ENSG00000137411.12	VARS2	var_30371118_G_GA_.	157	25	0.630329	0.605514	0.00686486	0.04483
ENSG00000137411.12	VARS2	var_30374211_A_G_rs3132619	157	24	0.629678	0.605818	0.013487	0.078431
ENSG00000137411.12	VARS2	var_30378408_T_C_rs3132617	157	25	0.630329	0.605514	0.00686486	0.04483
ENSG00000137411.12	VARS2	var_30381596_T_C_rs3131111	157	25	0.630329	0.605514	0.00686486	0.04483
ENSG00000137411.12	VARS2	var_30385746_C_G_rs3094717	157	25	0.630329	0.605514	0.00686486	0.04483
ENSG00000137411.12	VARS2	var_30395196_T_C_rs3130129	157	25	0.630329	0.605514	0.00686486	0.04483
ENSG00000137411.12	VARS2	var_30409249_T_C_rs3132645	157	25	0.630329	0.605514	0.00686486	0.04483
ENSG00000137411.12	VARS2	var_30416456_A_G_rs3132616	157	25	0.630329	0.605514	0.00686486	0.04483
ENSG00000137411.12	VARS2	var_30418966_C_A_.	157	25	0.630329	0.605514	0.00686486	0.04483
ENSG00000137411.12	VARS2	var_30432177_C_A_rs3130141	157	25	0.630329	0.605514	0.00686486	0.04483
ENSG00000137411.12	VARS2	var_30441303_C_T_rs3132615	157	25	0.630329	0.605514	0.00686486	0.04483
ENSG00000137411.12	VARS2	var_30447674_A_C_rs3131112	157	25	0.630329	0.605514	0.00686486	0.04483
ENSG00000137411.12	VARS2	var_30495860_A_G_rs3094024	157	25	0.630329	0.605514	0.00686486	0.04483
ENSG00000137411.12	VARS2	var_30508956_G_A_rs3130117	157	25	0.630329	0.605514	0.00686486	0.04483
ENSG00000137411.12	VARS2	var_30515043_T_C_rs3130247	157	25	0.630329	0.605514	0.00686486	0.04483
ENSG00000137411.12	VARS2	var_30536872_T_A_rs3130241	157	25	0.635097	0.604611	0.000577157	0.00865945
ENSG00000137411.12	VARS2	var_30544401_A_G_rs3132610	157	30	0.62884	0.604889	0.00332914	0.031362
ENSG00000137411.12	VARS2	var_30566407_A_G_rs3095276	157	25	0.630329	0.605514	0.00686486	0.04483
ENSG00000137411.12	VARS2	var_30596421_G_A_rs9262126	157	25	0.630329	0.605514	0.00686486	0.04483
ENSG00000137411.12	VARS2	var_30603519_G_A_rs9262130	157	25	0.630329	0.605514	0.00686486	0.04483
ENSG00000137411.12	VARS2	var_30611350_C_A_rs9262132	157	25	0.630329	0.605514	0.00686486	0.04483
ENSG00000137411.12	VARS2	var_30618906_A_G_rs9262135	157	25	0.630329	0.605514	0.00686486	0.04483
ENSG00000137411.12	VARS2	var_30644137_T_C_rs9262141	157	27	0.6287	0.605471	0.00963524	0.059808
ENSG00000137411.12	VARS2	var_30650026_G_A_rs9262142	157	25	0.630329	0.605514	0.00686486	0.04483
ENSG00000137411.12	VARS2	var_30652781_C_T_rs9262143	157	25	0.630329	0.605514	0.00686486	0.04483
ENSG00000137411.12	VARS2	var_30656828_C_G_rs9262146	157	25	0.630329	0.605514	0.00686486	0.04483
ENSG00000137411.12	VARS2	var_30666445_CGA_C_rs147637345	157	25	0.630329	0.605514	0.00686486	0.04483
ENSG00000137411.12	VARS2	var_30687614_G_C_rs3132585	157	25	0.630329	0.605514	0.00686486	0.04483
ENSG00000137411.12	VARS2	var_30688575_G_C_rs3132583	157	25	0.630329	0.605514	0.00686486	0.04483
ENSG00000137411.12	VARS2	var_30689001_T_A_rs3132582	157	27	0.62948	0.605309	0.00492449	0.0350855
ENSG00000137411.12	VARS2	var_30694863_CTA_C_rs140504225	157	25	0.630329	0.605514	0.00686486	0.04483
ENSG00000137411.12	VARS2	var_30699022_G_A_rs3095327	157	27	0.62948	0.605309	0.00492449	0.0350855
ENSG00000137411.12	VARS2	var_30701092_C_T_rs3130658	157	25	0.630329	0.605514	0.00686486	0.04483
ENSG00000137411.12	VARS2	var_30706361_T_A_rs3130660	157	25	0.630329	0.605514	0.00686486	0.04483
ENSG00000137411.12	VARS2	var_30708695_C_T_rs3130661	157	25	0.630329	0.605514	0.00686486	0.04483
ENSG00000137411.12	VARS2	var_30708955_C_T_rs1059612	157	25	0.630329	0.605514	0.00686486	0.04483
ENSG00000137411.12	VARS2	var_30709357_G_A_rs3094125	157	25	0.630329	0.605514	0.00686486	0.04483
ENSG00000137411.12	VARS2	var_30717258_C_T_rs3129972	157	23	0.627456	0.606378	0.0253286	0.123817
ENSG00000137411.12	VARS2	var_30721143_C_T_rs3129973	157	31	0.624535	0.605758	0.0161539	0.0893856
ENSG00000137411.12	VARS2	var_30722267_C_A_rs3095332	157	30	0.624824	0.605838	0.0178573	0.0950769
ENSG00000137411.12	VARS2	var_30723169_A_G_rs3129974	157	30	0.624824	0.605838	0.0178573	0.0950769
ENSG00000137411.12	VARS2	var_30723781_G_A_rs3095328	157	30	0.624824	0.605838	0.0178573	0.0950769
ENSG00000137411.12	VARS2	var_30725841_C_T_rs3095326	157	31	0.624535	0.605758	0.0161539	0.0893856
ENSG00000137411.12	VARS2	var_30726939_A_C_rs3095340	157	44	0.61621	0.606839	0.285096	0.594222
ENSG00000137411.12	VARS2	var_30728360_T_G_rs3094122	157	52	0.619198	0.604646	0.0284404	0.134487
ENSG00000137411.12	VARS2	var_30730339_T_C_rs9262172	157	52	0.618283	0.605099	0.0651391	0.233045
ENSG00000137411.12	VARS2	var_30730345_G_C_rs9262173	157	43	0.622602	0.604511	0.0075693	0.0483692
ENSG00000137411.12	VARS2	var_30730482_G_T_rs9262174	157	33	0.622131	0.606095	0.0453761	0.180731
ENSG00000137411.12	VARS2	var_30730960_C_T_rs3094121	157	43	0.622602	0.604511	0.0075693	0.0483692
ENSG00000137411.12	VARS2	var_30731401_A_T_rs3095338	157	32	0.622676	0.606084	0.0429667	0.173936
ENSG00000137411.12	VARS2	var_30731556_C_T_rs3094120	157	43	0.622602	0.604511	0.0075693	0.0483692
ENSG00000137411.12	VARS2	var_30731633_C_T_rs3094119	157	43	0.622602	0.604511	0.0075693	0.0483692
ENSG00000137411.12	VARS2	var_30732054_T_C_rs3129975	157	43	0.622602	0.604511	0.0075693	0.0483692
ENSG00000137411.12	VARS2	var_30732858_C_T_rs3094118	157	31	0.62443	0.605784	0.0167482	0.091717
ENSG00000137411.12	VARS2	var_30733974_G_A_rs3131037	157	42	0.622329	0.604768	0.0117348	0.0709618
ENSG00000137411.12	VARS2	var_30734041_AT_A_.	157	71	0.611989	0.607382	0.554693	0.864373
ENSG00000137411.12	VARS2	var_30734080_G_A_rs3131038	157	43	0.621862	0.60479	0.013513	0.0785628
ENSG00000137411.12	VARS2	var_30734803_TTTTG_T_rs60513310	157	66	0.616897	0.604076	0.0745268	0.251104
ENSG00000137411.12	VARS2	var_30735979_C_T_rs3130665	157	31	0.62443	0.605784	0.0167482	0.091717
ENSG00000137411.12	VARS2	var_30737486_A_C_rs3094117	157	76	0.613309	0.60586	0.356516	0.674908
ENSG00000137411.12	VARS2	var_30737591_G_C_rs3095337	157	57	0.615652	0.605939	0.253991	0.553091
ENSG00000137411.12	VARS2	var_30737675_GC_G_rs9278760	157	31	0.62443	0.605784	0.0167482	0.091717
ENSG00000137411.12	VARS2	var_30738408_A_T_rs3094116	157	74	0.612143	0.607078	0.44228	0.762546
ENSG00000137411.12	VARS2	var_30738446_G_A_rs3095336	157	31	0.62443	0.605784	0.0167482	0.091717
ENSG00000137411.12	VARS2	var_30738469_A_G_rs3094115	157	74	0.612143	0.607078	0.44228	0.762546
ENSG00000137411.12	VARS2	var_30738921_A_G_rs3094114	157	74	0.612143	0.607078	0.44228	0.762546
ENSG00000137411.12	VARS2	var_30739846_C_T_rs6911628	157	74	0.612143	0.607078	0.44228	0.762546
ENSG00000137411.12	VARS2	var_30739972_A_C_rs3132605	157	31	0.62443	0.605784	0.0167482	0.091717
ENSG00000137411.12	VARS2	var_30741226_C_T_rs3132604	157	56	0.616904	0.605341	0.148284	0.390762
ENSG00000137411.12	VARS2	var_30741305_G_C_rs3095335	157	56	0.616904	0.605341	0.148284	0.390762
ENSG00000137411.12	VARS2	var_30742713_G_C_rs3095334	157	31	0.62443	0.605784	0.0167482	0.091717
ENSG00000137411.12	VARS2	var_30743729_G_A_rs3130668	157	30	0.624824	0.605838	0.0178573	0.0950769
ENSG00000137411.12	VARS2	var_30743739_G_A_rs3130669	157	31	0.62443	0.605784	0.0167482	0.091717
ENSG00000137411.12	VARS2	var_30743864_T_G_rs3130670	157	31	0.62443	0.605784	0.0167482	0.091717
ENSG00000137411.12	VARS2	var_30744138_G_GC_rs9281038	157	76	0.61152	0.607538	0.619179	0.929016
ENSG00000137411.12	VARS2	var_30744200_C_T_rs3132603	157	31	0.62443	0.605784	0.0167482	0.091717
ENSG00000137411.12	VARS2	var_30745633_G_A_rs3130671	157	64	0.615805	0.605103	0.113136	0.330799
ENSG00000137411.12	VARS2	var_30745717_G_T_rs3130672	157	64	0.615805	0.605103	0.113136	0.330799
ENSG00000137411.12	VARS2	var_30745777_T_A_rs3132601	157	66	0.615182	0.60532	0.14241	0.382328
ENSG00000137411.12	VARS2	var_30746331_A_G_rs3129978	157	31	0.62443	0.605784	0.0167482	0.091717
ENSG00000137411.12	VARS2	var_30746367_C_T_rs3132600	157	30	0.624824	0.605838	0.0178573	0.0950769
ENSG00000137411.12	VARS2	var_30746519_G_T_rs3130673	157	31	0.62443	0.605784	0.0167482	0.091717
ENSG00000137411.12	VARS2	var_30748164_C_G_rs3132599	157	31	0.62443	0.605784	0.0167482	0.091717
ENSG00000137411.12	VARS2	var_30750925_T_A_rs3095333	157	31	0.62443	0.605784	0.0167482	0.091717
ENSG00000137411.12	VARS2	var_30755067_C_T_rs3131041	157	31	0.62443	0.605784	0.0167482	0.091717
ENSG00000137411.12	VARS2	var_30758371_C_G_rs3129980	157	31	0.62443	0.605784	0.0167482	0.091717
ENSG00000137411.12	VARS2	var_30758648_AATGGCC_A_rs141083567	157	31	0.62443	0.605784	0.0167482	0.091717
ENSG00000137411.12	VARS2	var_30758664_A_C_rs3131044	157	31	0.62443	0.605784	0.0167482	0.091717
ENSG00000137411.12	VARS2	var_30758848_T_A_rs3131045	157	31	0.62443	0.605784	0.0167482	0.091717
ENSG00000137411.12	VARS2	var_30758857_C_T_rs3129981	157	42	0.624222	0.604076	0.00514839	0.0365
ENSG00000137411.12	VARS2	var_30759335_T_C_rs3131047	157	31	0.62443	0.605784	0.0167482	0.091717
ENSG00000137411.12	VARS2	var_30759426_G_A_rs3131048	157	31	0.62443	0.605784	0.0167482	0.091717
ENSG00000137411.12	VARS2	var_30759489_A_G_rs3131049	157	31	0.62443	0.605784	0.0167482	0.091717
ENSG00000137411.12	VARS2	var_30760025_T_C_rs3131050	157	31	0.62443	0.605784	0.0167482	0.091717
ENSG00000137411.12	VARS2	var_30760190_C_T_rs3129982	157	31	0.62443	0.605784	0.0167482	0.091717
ENSG00000137411.12	VARS2	var_30760232_A_T_rs3131052	157	31	0.62443	0.605784	0.0167482	0.091717
ENSG00000137411.12	VARS2	var_30760276_C_T_rs3129983	157	31	0.62443	0.605784	0.0167482	0.091717
ENSG00000137411.12	VARS2	var_30760725_G_A_rs9262200	157	31	0.62443	0.605784	0.0167482	0.091717
ENSG00000137411.12	VARS2	var_30760781_A_AC_rs9281044	157	31	0.62443	0.605784	0.0167482	0.091717
ENSG00000137411.12	VARS2	var_30760850_T_TA_.	157	32	0.625172	0.605445	0.00876712	0.0551439
ENSG00000137411.12	VARS2	var_30760907_T_C_rs9262202	157	31	0.62443	0.605784	0.0167482	0.091717
ENSG00000137411.12	VARS2	var_30760968_C_T_rs9262203	157	31	0.62443	0.605784	0.0167482	0.091717
ENSG00000137411.12	VARS2	var_30761089_G_A_rs9262204	157	31	0.62443	0.605784	0.0167482	0.091717
ENSG00000137411.12	VARS2	var_30761132_C_T_rs3131054	157	31	0.62443	0.605784	0.0167482	0.091717
ENSG00000137411.12	VARS2	var_30761487_T_C_rs3131055	157	31	0.62443	0.605784	0.0167482	0.091717
ENSG00000137411.12	VARS2	var_30761572_C_T_rs3129984	157	30	0.624824	0.605838	0.0178573	0.0950769
ENSG00000137411.12	VARS2	var_30762238_A_G_rs3131058	157	31	0.62443	0.605784	0.0167482	0.091717
ENSG00000137411.12	VARS2	var_30762542_C_T_rs3129985	157	31	0.62443	0.605784	0.0167482	0.091717
ENSG00000137411.12	VARS2	var_30763049_T_TAAA_rs148331720	157	31	0.62443	0.605784	0.0167482	0.091717
ENSG00000137411.12	VARS2	var_30763291_G_A_rs3131060	157	35	0.620549	0.606286	0.0713957	0.248774
ENSG00000137411.12	VARS2	var_30763562_C_T_rs3129986	157	35	0.619082	0.606707	0.133797	0.36405
ENSG00000137411.12	VARS2	var_30763714_T_A_rs3131062	157	35	0.619082	0.606707	0.133797	0.36405
ENSG00000137411.12	VARS2	var_30764081_C_T_rs3130641	157	31	0.62443	0.605784	0.0167482	0.091717
ENSG00000137411.12	VARS2	var_30764907_G_A_rs1264377	157	45	0.618361	0.605892	0.0713642	0.248692
ENSG00000137411.12	VARS2	var_30765579_C_A_rs1264376	157	32	0.624309	0.605666	0.0172496	0.0938781
ENSG00000137411.12	VARS2	var_30769273_G_A_rs1264373	157	31	0.62311	0.606109	0.038425	0.159098
ENSG00000137411.12	VARS2	var_30777498_A_G_rs1264361	157	33	0.625625	0.605165	0.0163141	0.0901036
ENSG00000137411.12	VARS2	var_30780568_C_T_rs2524266	157	32	0.626032	0.605225	0.0174547	0.0939133
ENSG00000137411.12	VARS2	var_30781301_T_C_rs886425	157	33	0.625625	0.605165	0.0163141	0.0901036
ENSG00000137411.12	VARS2	var_30782002_C_T_rs886424	157	33	0.625625	0.605165	0.0163141	0.0901036
ENSG00000137411.12	VARS2	var_30783284_G_GT_.	157	33	0.625625	0.605165	0.0163141	0.0901036
ENSG00000137411.12	VARS2	var_30784068_C_T_rs1264356	157	33	0.625625	0.605165	0.0163141	0.0901036
ENSG00000137411.12	VARS2	var_30784193_G_A_rs1264355	157	33	0.625625	0.605165	0.0163141	0.0901036
ENSG00000137411.12	VARS2	var_30787762_C_A_rs1264353	157	33	0.625625	0.605165	0.0163141	0.0901036
ENSG00000137411.12	VARS2	var_30792117_G_C_rs1264351	157	31	0.62311	0.606109	0.038425	0.159098
ENSG00000137411.12	VARS2	var_30796545_T_C_rs1264350	157	30	0.625626	0.605648	0.040212	0.16478
ENSG00000137411.12	VARS2	var_30796659_A_G_rs1264349	157	31	0.62311	0.606109	0.038425	0.159098
ENSG00000137411.12	VARS2	var_30798697_C_T_rs1264347	157	32	0.622374	0.606161	0.0486388	0.187384
ENSG00000137411.12	VARS2	var_30802017_C_A_rs1264342	156	90	0.607842	0.612326	0.649993	0.957267
ENSG00000137411.12	VARS2	var_30802465_T_C_rs1264341	157	32	0.622374	0.606161	0.0486388	0.187384
ENSG00000137411.12	VARS2	var_30803526_A_G_rs1110482	157	32	0.622374	0.606161	0.0486388	0.187384
ENSG00000137411.12	VARS2	var_30808762_C_T_rs2517582	157	94	0.609328	0.609671	0.558195	0.868807
ENSG00000137411.12	VARS2	var_30810056_G_A_rs2517580	157	75	0.606957	0.61176	0.58234	0.893688
ENSG00000137411.12	VARS2	var_30810084_A_G_rs2535337	157	93	0.607178	0.612789	0.583468	0.893688
ENSG00000137411.12	VARS2	var_30810654_A_C_rs2535336	157	94	0.609348	0.609641	0.565439	0.876748
ENSG00000137411.12	VARS2	var_30811164_C_A_rs2517579	157	75	0.606957	0.61176	0.58234	0.893688
ENSG00000137411.12	VARS2	var_30811265_G_C_rs2517578	157	32	0.622374	0.606161	0.0486388	0.187384
ENSG00000137411.12	VARS2	var_30812497_A_G_rs2535335	157	94	0.609348	0.609641	0.565439	0.876748
ENSG00000137411.12	VARS2	var_30812996_G_A_rs2535334	157	32	0.622374	0.606161	0.0486388	0.187384
ENSG00000137411.12	VARS2	var_30813097_G_A_rs2535333	157	58	0.621888	0.602188	0.0060689	0.041252
ENSG00000137411.12	VARS2	var_30813249_C_T_rs2535332	157	32	0.622374	0.606161	0.0486388	0.187384
ENSG00000137411.12	VARS2	var_30813292_C_A_rs2517577	157	93	0.607178	0.612789	0.583468	0.893688
ENSG00000137411.12	VARS2	var_30815035_G_A_rs2517576	157	58	0.621888	0.602188	0.0060689	0.041252
ENSG00000137411.12	VARS2	var_30815945_C_T_rs2844664	157	94	0.606801	0.613441	0.442388	0.762692
ENSG00000137411.12	VARS2	var_30815951_C_T_rs2844663	157	94	0.609348	0.609641	0.565439	0.876748
ENSG00000137411.12	VARS2	var_30816270_G_A_rs2535331	157	93	0.607178	0.612789	0.583468	0.893688
ENSG00000137411.12	VARS2	var_30817879_C_T_rs2844662	157	94	0.609348	0.609641	0.565439	0.876748
ENSG00000137411.12	VARS2	var_30819465_A_G_rs2517575	157	94	0.609348	0.609641	0.565439	0.876748
ENSG00000137411.12	VARS2	var_30820373_C_T_rs2263298	157	30	0.624824	0.605838	0.0178573	0.0950769
ENSG00000137411.12	VARS2	var_30821522_C_T_rs2844661	157	32	0.622374	0.606161	0.0486388	0.187384
ENSG00000137411.12	VARS2	var_30822002_GAC_G_rs149894926	152	26	0.627298	0.606059	0.0224556	0.112069
ENSG00000137411.12	VARS2	var_30824532_C_T_rs2844659	157	58	0.621888	0.602188	0.0060689	0.041252
ENSG00000137411.12	VARS2	var_30824642_C_T_rs2535330	157	93	0.607178	0.612789	0.583468	0.893688
ENSG00000137411.12	VARS2	var_30825812_G_A_rs2844658	157	93	0.607178	0.612789	0.583468	0.893688
ENSG00000137411.12	VARS2	var_30825994_C_T_rs2535328	157	32	0.622374	0.606161	0.0486388	0.187384
ENSG00000137411.12	VARS2	var_30826904_T_C_rs2535327	157	89	0.606414	0.61346	0.374863	0.702718
ENSG00000137411.12	VARS2	var_30826945_GA_G_rs9278783	157	32	0.622374	0.606161	0.0486388	0.187384
ENSG00000137411.12	VARS2	var_30829522_A_G_rs2844657	157	58	0.621888	0.602188	0.0060689	0.041252
ENSG00000137411.12	VARS2	var_30831195_G_A_rs3132577	157	32	0.622374	0.606161	0.0486388	0.187384
ENSG00000137411.12	VARS2	var_30832063_C_T_rs2535326	157	94	0.609348	0.609641	0.565439	0.876748
ENSG00000137411.12	VARS2	var_30833081_C_T_rs2535325	157	93	0.607178	0.612789	0.583468	0.893688
ENSG00000137411.12	VARS2	var_30833949_GGCCCA_G_.	157	32	0.622374	0.606161	0.0486388	0.187384
ENSG00000137411.12	VARS2	var_30833957_T_TGCGGGC_.	157	32	0.622374	0.606161	0.0486388	0.187384
ENSG00000137411.12	VARS2	var_30834331_A_G_rs2844656	157	32	0.622374	0.606161	0.0486388	0.187384
ENSG00000137411.12	VARS2	var_30836489_TC_T_rs9278786	157	93	0.607178	0.612789	0.583468	0.893688
ENSG00000137411.12	VARS2	var_30837538_G_C_rs2844655	157	89	0.606414	0.61346	0.374863	0.702718
ENSG00000137411.12	VARS2	var_30837646_T_C_rs3130657	157	93	0.607178	0.612789	0.583468	0.893688
ENSG00000137411.12	VARS2	var_30838043_G_C_rs2535341	156	52	0.623499	0.602962	0.0057571	0.0395145
ENSG00000137411.12	VARS2	var_30838497_T_C_rs2535340	157	32	0.622374	0.606161	0.0486388	0.187384
ENSG00000137411.12	VARS2	var_30838688_T_G_rs2844654	157	93	0.607178	0.612789	0.583468	0.893688
ENSG00000137411.12	VARS2	var_30839430_C_T_rs2535339	157	93	0.607178	0.612789	0.583468	0.893688
ENSG00000137411.12	VARS2	var_30840147_T_C_rs2517573	157	94	0.609348	0.609641	0.565439	0.876748
ENSG00000137411.12	VARS2	var_30842095_TA_T_rs370737332	157	93	0.607178	0.612789	0.583468	0.893688
ENSG00000137411.12	VARS2	var_30842629_C_T_rs2517572	157	32	0.622374	0.606161	0.0486388	0.187384
ENSG00000137411.12	VARS2	var_30842674_C_T_rs2535329	157	89	0.606414	0.61346	0.374863	0.702718
ENSG00000137411.12	VARS2	var_30844260_G_A_rs1264334	157	94	0.609348	0.609641	0.565439	0.876748
ENSG00000137411.12	VARS2	var_30844314_T_C_rs1264333	157	93	0.607178	0.612789	0.583468	0.893688
ENSG00000137411.12	VARS2	var_30845563_G_C_rs1264332	157	93	0.607178	0.612789	0.583468	0.893688
ENSG00000137411.12	VARS2	var_30846830_G_T_rs1264331	157	93	0.607178	0.612789	0.583468	0.893688
ENSG00000137411.12	VARS2	var_30850582_G_A_rs1264327	157	89	0.606414	0.61346	0.374863	0.702718
ENSG00000137411.12	VARS2	var_30851909_C_A_rs1264326	157	32	0.622374	0.606161	0.0486388	0.187384
ENSG00000137411.12	VARS2	var_30851989_G_A_rs1264325	156	31	0.622212	0.606161	0.062136	0.225417
ENSG00000137411.12	VARS2	var_30855211_T_G_rs1264324	157	30	0.624824	0.605838	0.0178573	0.0950769
ENSG00000137411.12	VARS2	var_30857894_G_A_rs1264322	157	32	0.622374	0.606161	0.0486388	0.187384
ENSG00000137411.12	VARS2	var_30859344_G_A_rs1264321	157	30	0.624824	0.605838	0.0178573	0.0950769
ENSG00000137411.12	VARS2	var_30861000_C_T_rs1264320	157	93	0.607178	0.612789	0.583468	0.893688
ENSG00000137411.12	VARS2	var_30862423_C_T_rs1264319	157	59	0.622191	0.601804	0.00350744	0.0316931
ENSG00000137411.12	VARS2	var_30863530_C_G_rs1264318	157	59	0.622191	0.601804	0.00350744	0.0316931
ENSG00000137411.12	VARS2	var_30864279_C_T_rs886422	157	32	0.622374	0.606161	0.0486388	0.187384
ENSG00000137411.12	VARS2	var_30864700_C_T_rs1264317	157	93	0.607178	0.612789	0.583468	0.893688
ENSG00000137411.12	VARS2	var_30865058_C_T_rs1264315	157	75	0.606957	0.61176	0.58234	0.893688
ENSG00000137411.12	VARS2	var_30867527_G_A_rs1049633	157	32	0.622374	0.606161	0.0486388	0.187384
ENSG00000137411.12	VARS2	var_30872783_C_T_rs1264313	157	32	0.622374	0.606161	0.0486388	0.187384
ENSG00000137411.12	VARS2	var_30872982_G_A_rs1264312	157	32	0.622374	0.606161	0.0486388	0.187384
ENSG00000137411.12	VARS2	var_30873041_G_A_rs1264311	157	93	0.607178	0.612789	0.583468	0.893688
ENSG00000137411.12	VARS2	var_30873605_C_A_rs1264310	157	32	0.622374	0.606161	0.0486388	0.187384
ENSG00000137411.12	VARS2	var_30875899_A_G_rs1264309	157	93	0.607178	0.612789	0.583468	0.893688
ENSG00000137411.12	VARS2	var_30879636_C_T_rs886420	157	30	0.624824	0.605838	0.0178573	0.0950769
ENSG00000137411.12	VARS2	var_30879987_C_T_rs1264308	157	32	0.622374	0.606161	0.0486388	0.187384
ENSG00000137411.12	VARS2	var_30880757_G_A_rs1264307	157	93	0.607178	0.612789	0.583468	0.893688
ENSG00000137411.12	VARS2	var_30882203_T_C_rs1264306	157	92	0.608203	0.611253	0.823741	1
ENSG00000137411.12	VARS2	var_30882277_C_T_rs1264305	157	93	0.607178	0.612789	0.583468	0.893688
ENSG00000137411.12	VARS2	var_30882415_C_T_rs1264304	157	32	0.622374	0.606161	0.0486388	0.187384
ENSG00000137411.12	VARS2	var_30882513_A_G_rs1264303	157	93	0.607178	0.612789	0.583468	0.893688
ENSG00000137411.12	VARS2	var_30882634_C_T_rs1264302	157	93	0.607178	0.612789	0.583468	0.893688
ENSG00000137411.12	VARS2	var_30882781_G_T_rs1264301	157	93	0.607178	0.612789	0.583468	0.893688
ENSG00000137411.12	VARS2	var_30882856_A_G_rs1264300	157	93	0.607178	0.612789	0.583468	0.893688
ENSG00000137411.12	VARS2	var_30883920_C_T_rs1264299	157	93	0.607178	0.612789	0.583468	0.893688
ENSG00000137411.12	VARS2	var_30884251_G_A_rs41266876	157	89	0.606414	0.61346	0.374863	0.702718
ENSG00000137411.12	VARS2	var_30884253_G_A_rs9262287	157	93	0.607178	0.612789	0.583468	0.893688
ENSG00000137411.12	VARS2	var_30884331_CG_C_.	157	93	0.607178	0.612789	0.583468	0.893688
ENSG00000137411.12	VARS2	var_30884436_A_G_rs1264298	157	93	0.607178	0.612789	0.583468	0.893688
ENSG00000137411.12	VARS2	var_30884806_A_C_rs1264297	157	93	0.607178	0.612789	0.583468	0.893688
ENSG00000137411.12	VARS2	var_30885639_A_G_rs9262288	157	93	0.607178	0.612789	0.583468	0.893688
ENSG00000137411.12	VARS2	var_30885686_T_A_rs9262289	157	93	0.607178	0.612789	0.583468	0.893688
ENSG00000137411.12	VARS2	var_30885821_G_A_rs9262290	157	93	0.607178	0.612789	0.583468	0.893688
ENSG00000137411.12	VARS2	var_30885839_TTTTG_T_rs147192830	157	93	0.607178	0.612789	0.583468	0.893688
ENSG00000137411.12	VARS2	var_30886015_T_G_rs9262291	157	93	0.607178	0.612789	0.583468	0.893688
ENSG00000137411.12	VARS2	var_30886079_G_A_rs9262292	157	93	0.607178	0.612789	0.583468	0.893688
ENSG00000137411.12	VARS2	var_30886350_C_G_rs9262293	157	93	0.607178	0.612789	0.583468	0.893688
ENSG00000137411.12	VARS2	var_30887207_C_T_rs9262294	157	93	0.607178	0.612789	0.583468	0.893688
ENSG00000137411.12	VARS2	var_30887311_C_T_rs7756286	157	93	0.607178	0.612789	0.583468	0.893688
ENSG00000137411.12	VARS2	var_30887344_T_C_rs7738138	157	93	0.607178	0.612789	0.583468	0.893688
ENSG00000137411.12	VARS2	var_30887780_C_CTGGGGCGGTGCAGGTGA_rs150739982	157	93	0.608123	0.611417	0.787393	1
ENSG00000137411.12	VARS2	var_30887988_C_T_rs2249459	157	93	0.607178	0.612789	0.583468	0.893688
ENSG00000137411.12	VARS2	var_30888161_T_C_rs2249464	157	93	0.608123	0.611417	0.787393	1
ENSG00000137411.12	VARS2	var_30888169_G_A_rs2517468	157	93	0.607178	0.612789	0.583468	0.893688
ENSG00000137411.12	VARS2	var_30889120_A_G_rs2532943	157	93	0.607178	0.612789	0.583468	0.893688
ENSG00000137411.12	VARS2	var_30889260_G_A_rs2517467	157	93	0.608123	0.611417	0.787393	1
ENSG00000137411.12	VARS2	var_30890055_T_C_rs2517466	157	93	0.607178	0.612789	0.583468	0.893688
ENSG00000137411.12	VARS2	var_30890206_T_C_rs887381	157	93	0.607178	0.612789	0.583468	0.893688
ENSG00000137411.12	VARS2	var_30890483_G_T_rs2074506	157	93	0.607178	0.612789	0.583468	0.893688
ENSG00000137411.12	VARS2	var_30890569_G_T_rs753726	157	93	0.607178	0.612789	0.583468	0.893688
ENSG00000137411.12	VARS2	var_30890871_T_C_rs753725	157	93	0.608123	0.611417	0.787393	1
ENSG00000137411.12	VARS2	var_30891704_C_CCG_rs10653650	157	93	0.607178	0.612789	0.583468	0.893688
ENSG00000137411.12	VARS2	var_30891795_G_GTGC_rs9281080	157	93	0.607178	0.612789	0.583468	0.893688
ENSG00000137411.12	VARS2	var_30892322_C_T_rs2532942	157	93	0.607178	0.612789	0.583468	0.893688
ENSG00000137411.12	VARS2	var_30892377_G_C_rs2252760	157	93	0.607178	0.612789	0.583468	0.893688
ENSG00000137411.12	VARS2	var_30892592_G_C_rs2532940	157	93	0.607178	0.612789	0.583468	0.893688
ENSG00000137411.12	VARS2	var_30893226_C_G_rs2532939	157	93	0.607178	0.612789	0.583468	0.893688
ENSG00000137411.12	VARS2	var_30893251_G_A_rs2252856	157	93	0.607178	0.612789	0.583468	0.893688
ENSG00000137411.12	VARS2	var_30893428_G_A_rs2252863	157	93	0.607178	0.612789	0.583468	0.893688
ENSG00000137411.12	VARS2	var_30893831_G_A_rs2532938	157	93	0.607178	0.612789	0.583468	0.893688
ENSG00000137411.12	VARS2	var_30893941_G_A_rs4678	157	52	0.624843	0.60185	0.00127951	0.015617
ENSG00000137411.12	VARS2	var_30894344_G_A_rs2532937	157	93	0.607178	0.612789	0.583468	0.893688
ENSG00000137411.12	VARS2	var_30894408_A_C_rs2532936	157	93	0.607178	0.612789	0.583468	0.893688
ENSG00000137411.12	VARS2	var_30894416_GACTA_G_rs376115804	157	93	0.607178	0.612789	0.583468	0.893688
ENSG00000137411.12	VARS2	var_30894573_C_T_rs2532935	157	93	0.607178	0.612789	0.583468	0.893688
ENSG00000137411.12	VARS2	var_30894759_G_A_rs2532934	157	93	0.608123	0.611417	0.787393	1
ENSG00000137411.12	VARS2	var_30894965_T_A_rs3094088	157	32	0.622374	0.606161	0.0486388	0.187384
ENSG00000137411.12	VARS2	var_30895264_C_T_rs2517463	157	93	0.607178	0.612789	0.583468	0.893688
ENSG00000137411.12	VARS2	var_30895293_A_G_rs2532933	157	93	0.607178	0.612789	0.583468	0.893688
ENSG00000137411.12	VARS2	var_30895592_G_A_rs2394856	157	93	0.607178	0.612789	0.583468	0.893688
ENSG00000137411.12	VARS2	var_30895725_G_A_rs2532930	157	93	0.607178	0.612789	0.583468	0.893688
ENSG00000137411.12	VARS2	var_30896190_T_C_rs2517462	157	93	0.607178	0.612789	0.583468	0.893688
ENSG00000137411.12	VARS2	var_30896399_T_C_rs2517461	157	93	0.607178	0.612789	0.583468	0.893688
ENSG00000137411.12	VARS2	var_30897774_A_G_rs2532929	157	91	0.608452	0.610863	0.924922	1
ENSG00000137411.12	VARS2	var_30898295_A_G_rs2532928	157	93	0.607178	0.612789	0.583468	0.893688
ENSG00000137411.12	VARS2	var_30898434_A_G_rs2532927	157	93	0.607178	0.612789	0.583468	0.893688
ENSG00000137411.12	VARS2	var_30898441_A_G_rs2532926	157	93	0.607178	0.612789	0.583468	0.893688
ENSG00000137411.12	VARS2	var_30898442_C_T_rs2517457	157	93	0.607178	0.612789	0.583468	0.893688
ENSG00000137411.12	VARS2	var_30898687_C_T_rs2844652	157	93	0.607178	0.612789	0.583468	0.893688
ENSG00000137411.12	VARS2	var_30899051_G_C_rs3095155	157	32	0.622374	0.606161	0.0486388	0.187384
ENSG00000137411.12	VARS2	var_30899052_G_A_rs3095154	157	52	0.624843	0.60185	0.00127951	0.015617
ENSG00000137411.12	VARS2	var_30899195_G_A_rs3095153	157	33	0.62172	0.606204	0.0582985	0.213075
ENSG00000137411.12	VARS2	var_30899524_T_C_rs3131787	157	52	0.624843	0.60185	0.00127951	0.015617
ENSG00000137411.12	VARS2	var_30899650_G_A_rs3095152	157	33	0.62172	0.606204	0.0582985	0.213075
ENSG00000137411.12	VARS2	var_30900150_G_T_rs3095151	157	52	0.624929	0.601807	0.00118314	0.0145643
ENSG00000137411.12	VARS2	var_30900664_T_C_rs2844651	157	93	0.60729	0.612627	0.698328	0.99819
ENSG00000137411.12	VARS2	var_30901872_C_G_rs3131786	157	78	0.60665	0.612246	0.621828	0.932658
ENSG00000137411.12	VARS2	var_30901895_C_G_rs3131785	157	95	0.606157	0.614535	0.383866	0.712855
ENSG00000137411.12	VARS2	var_30903445_GT_GTT_.	157	95	0.612269	0.60517	0.0651931	0.233168
ENSG00000137411.12	VARS2	var_30903948_C_T_rs3131784	157	95	0.606157	0.614535	0.383866	0.712855
ENSG00000137411.12	VARS2	var_30905313_A_G_rs3132571	157	76	0.606544	0.612206	0.601947	0.907513
ENSG00000137411.12	VARS2	var_30907335_T_C_rs3131921	157	37	0.62211	0.605567	0.0156303	0.0871055
ENSG00000137411.12	VARS2	var_30909382_ACCTG_A_rs147854926	157	69	0.618299	0.60254	0.0305656	0.142057
ENSG00000137411.12	VARS2	var_30909408_T_C_rs2243739	157	93	0.606691	0.613497	0.420519	0.745424
ENSG00000137411.12	VARS2	var_30912481_G_A_rs2844702	157	93	0.606691	0.613497	0.420519	0.745424
ENSG00000137411.12	VARS2	var_30913458_G_A_rs3132581	157	31	0.624049	0.605878	0.0224922	0.112181
ENSG00000137411.12	VARS2	var_30914552_T_C_rs3130781	157	52	0.625137	0.601704	0.000849461	0.0118326
ENSG00000137411.12	VARS2	var_30914843_C_T_rs3130782	157	44	0.615669	0.60705	0.306762	0.61939
ENSG00000137411.12	VARS2	var_30919391_G_A_rs3094086	157	31	0.624049	0.605878	0.0224922	0.112181
ENSG00000137411.12	VARS2	var_30919701_T_C_rs2517449	157	93	0.606691	0.613497	0.420519	0.745424
ENSG00000137411.12	VARS2	var_30920124_G_A_rs3132580	157	31	0.624049	0.605878	0.0224922	0.112181
ENSG00000137411.12	VARS2	var_30920890_G_A_rs2240804	157	89	0.605905	0.614126	0.253261	0.553091
ENSG00000137411.12	VARS2	var_30922088_G_A_rs3094085	157	68	0.616051	0.604434	0.108157	0.320058
ENSG00000137411.12	VARS2	var_30922570_C_G_rs2532921	157	91	0.606846	0.613078	0.475852	0.799805
ENSG00000137411.12	VARS2	var_30923411_CG_C_.	157	68	0.616051	0.604434	0.108157	0.320058
ENSG00000137411.12	VARS2	var_30923527_C_T_rs17189763	157	89	0.605905	0.614126	0.253261	0.553091
ENSG00000137411.12	VARS2	var_30923629_C_T_rs2532920	157	93	0.606691	0.613497	0.420519	0.745424
ENSG00000137411.12	VARS2	var_30926517_C_T_rs3095156	157	30	0.624824	0.605838	0.0178573	0.0950769
ENSG00000137411.12	VARS2	var_30931245_C_T_rs2844698	157	92	0.60434	0.616721	0.187899	0.464965
ENSG00000137411.12	VARS2	var_30931844_T_C_rs3131934	157	44	0.614706	0.607425	0.325629	0.645938
ENSG00000137411.12	VARS2	var_30932068_G_A_rs3131783	157	43	0.614739	0.607476	0.351901	0.668504
ENSG00000137411.12	VARS2	var_30933794_G_T_rs3095089	157	58	0.618562	0.604136	0.0256657	0.125265
ENSG00000137411.12	VARS2	var_30937732_A_G_rs3131781	157	31	0.623411	0.606035	0.0305494	0.142057
ENSG00000137411.12	VARS2	var_30940989_T_C_rs3132579	157	42	0.624844	0.603849	0.0026663	0.0263021
ENSG00000137411.12	VARS2	var_30947509_A_T_rs3094084	157	42	0.624844	0.603849	0.0026663	0.0263021
ENSG00000137411.12	VARS2	var_30951561_T_C_rs1634714	157	42	0.624844	0.603849	0.0026663	0.0263021
ENSG00000137411.12	VARS2	var_30962469_T_C_rs1632864	157	41	0.625204	0.603903	0.00270773	0.0263021
ENSG00000137411.12	VARS2	var_30969754_G_A_rs1634716	157	30	0.623855	0.606067	0.030872	0.143107
ENSG00000137411.12	VARS2	var_30971769_A_G_rs1632855	157	41	0.625204	0.603903	0.00270773	0.0263021
ENSG00000137411.12	VARS2	var_30977680_G_A_rs1634721	157	30	0.623855	0.606067	0.030872	0.143107
ENSG00000137411.12	VARS2	var_30985828_G_A_rs1634726	157	30	0.623855	0.606067	0.030872	0.143107
ENSG00000137411.12	VARS2	var_30986312_C_T_rs1345230	157	41	0.625204	0.603903	0.00270773	0.0263021
ENSG00000137411.12	VARS2	var_30988825_G_A_rs1628680	157	41	0.625204	0.603903	0.00270773	0.0263021
ENSG00000137411.12	VARS2	var_31016550_A_G_rs3130574	157	29	0.624634	0.606029	0.0253003	0.123698
ENSG00000137411.12	VARS2	var_31018908_T_G_rs3131920	157	29	0.624634	0.606029	0.0253003	0.123698
ENSG00000137411.12	VARS2	var_31020657_AAAGAAAGAAAGAAAGAAAGAAAGGAAGG_A_.	157	29	0.624634	0.606029	0.0253003	0.123698
ENSG00000137411.12	VARS2	var_31021078_A_G_rs2517528	157	87	0.611341	0.607135	0.409602	0.735269
ENSG00000137411.12	VARS2	var_31024796_G_A_rs3131788	157	29	0.624634	0.606029	0.0253003	0.123698
ENSG00000137411.12	VARS2	var_31037872_TTTTC_T_rs200744629	157	29	0.624634	0.606029	0.0253003	0.123698
ENSG00000137411.12	VARS2	var_31044463_T_C_rs3094671	157	29	0.624634	0.606029	0.0253003	0.123698
ENSG00000137411.12	VARS2	var_31051675_A_G_rs3095311	157	29	0.624634	0.606029	0.0253003	0.123698
ENSG00000137411.12	VARS2	var_31058340_C_A_rs3130544	157	29	0.624634	0.606029	0.0253003	0.123698
ENSG00000137411.12	VARS2	var_31060219_A_G_rs2535296	157	45	0.616612	0.606594	0.173636	0.439534
ENSG00000137411.12	VARS2	var_31061561_T_C_rs3094087	157	30	0.623095	0.606246	0.0452362	0.180197
ENSG00000137411.12	VARS2	var_31065071_C_T_rs3130968	157	30	0.623095	0.606246	0.0452362	0.180197
ENSG00000137411.12	VARS2	var_31066627_GACA_G_rs201376697	157	30	0.623095	0.606246	0.0452362	0.180197
ENSG00000137411.12	VARS2	var_31066633_A_G_rs144846110	157	30	0.623095	0.606246	0.0452362	0.180197
ENSG00000137411.12	VARS2	var_31072695_T_C_rs9263610	157	29	0.624634	0.606029	0.0253003	0.123698
ENSG00000137411.12	VARS2	var_31079644_G_A_rs2233980	157	29	0.624634	0.606029	0.0253003	0.123698
ENSG00000137411.12	VARS2	var_31081434_A_G_rs3094222	157	31	0.621927	0.6064	0.0649788	0.232498
ENSG00000137411.12	VARS2	var_31085356_C_T_rs3130985	157	27	0.623185	0.606616	0.0751968	0.251104
ENSG00000137411.12	VARS2	var_31172151_T_C_rs3132510	157	26	0.622309	0.606916	0.124279	0.350383
ENSG00000137411.12	VARS2	var_31288877_T_C_rs76217799	157	27	0.618613	0.607566	0.385649	0.714315
ENSG00000137411.12	VARS2	var_31300197_G_A_rs79158921	157	28	0.617637	0.607692	0.447911	0.768095
ENSG00000137411.12	VARS2	var_31302265_A_G_rs4947307	157	28	0.619689	0.607247	0.256411	0.556112
ENSG00000137411.12	VARS2	var_31306420_G_A_rs1625792	157	28	0.617637	0.607692	0.447911	0.768095
ENSG00000137411.12	VARS2	var_31308476_T_A_rs2854019	157	28	0.617637	0.607692	0.447911	0.768095
ENSG00000137411.12	VARS2	var_31308562_C_T_rs2854018	157	28	0.617637	0.607692	0.447911	0.768095
ENSG00000137411.12	VARS2	var_31308717_G_A_rs402175	157	28	0.617637	0.607692	0.447911	0.768095
ENSG00000137411.12	VARS2	var_31308988_C_T_rs1634776	157	28	0.617637	0.607692	0.447911	0.768095
ENSG00000137411.12	VARS2	var_31309785_G_A_rs3132474	157	28	0.617637	0.607692	0.447911	0.768095
ENSG00000137411.12	VARS2	var_31311449_T_A_rs9265831	157	28	0.617637	0.607692	0.447911	0.768095
ENSG00000137411.12	VARS2	var_31311912_G_T_rs2394976	157	29	0.618754	0.607361	0.286766	0.597413
ENSG00000137411.12	VARS2	var_31311950_T_C_rs2256747	157	28	0.617637	0.607692	0.447911	0.768095
ENSG00000137411.12	VARS2	var_31312020_G_A_rs2256750	157	28	0.617637	0.607692	0.447911	0.768095
ENSG00000137411.12	VARS2	var_31312259_G_A_rs2844589	157	28	0.617637	0.607692	0.447911	0.768095
ENSG00000137411.12	VARS2	var_31312326_T_G_rs3134792	157	28	0.617637	0.607692	0.447911	0.768095
ENSG00000137411.12	VARS2	var_31312492_A_G_rs2854010	157	28	0.617637	0.607692	0.447911	0.768095
ENSG00000137411.12	VARS2	var_31312607_G_C_rs9265857	157	28	0.617637	0.607692	0.447911	0.768095
ENSG00000137411.12	VARS2	var_31312656_C_T_rs2394978	157	28	0.617637	0.607692	0.447911	0.768095
ENSG00000137411.12	VARS2	var_31312729_G_A_rs2394979	157	28	0.617637	0.607692	0.447911	0.768095
ENSG00000137411.12	VARS2	var_31312941_C_T_rs2394980	157	28	0.617637	0.607692	0.447911	0.768095
ENSG00000137411.12	VARS2	var_31313029_G_T_rs2394981	157	28	0.617637	0.607692	0.447911	0.768095
ENSG00000137411.12	VARS2	var_31313221_A_C_rs9265886	157	28	0.617637	0.607692	0.447911	0.768095
ENSG00000137411.12	VARS2	var_31313677_C_T_rs9265908	157	28	0.617637	0.607692	0.447911	0.768095
ENSG00000137411.12	VARS2	var_31313722_C_T_rs9265910	157	28	0.617637	0.607692	0.447911	0.768095
ENSG00000137411.12	VARS2	var_31314274_A_G_rs7749555	157	28	0.617637	0.607692	0.447911	0.768095
ENSG00000137411.12	VARS2	var_31314652_A_G_rs2507998	157	28	0.617637	0.607692	0.447911	0.768095
ENSG00000137411.12	VARS2	var_31314938_C_T_rs9265937	157	28	0.617637	0.607692	0.447911	0.768095
ENSG00000137411.12	VARS2	var_31315005_C_T_rs9265938	157	28	0.617637	0.607692	0.447911	0.768095
ENSG00000137411.12	VARS2	var_31315027_A_G_rs9265939	157	28	0.617637	0.607692	0.447911	0.768095
ENSG00000137411.12	VARS2	var_31315339_C_T_rs9265954	157	28	0.617637	0.607692	0.447911	0.768095
ENSG00000137411.12	VARS2	var_31315618_A_G_rs9265964	157	28	0.617637	0.607692	0.447911	0.768095
ENSG00000137411.12	VARS2	var_31315629_T_C_rs9265965	157	28	0.617637	0.607692	0.447911	0.768095
ENSG00000137411.12	VARS2	var_31315649_G_T_rs9265967	157	28	0.617637	0.607692	0.447911	0.768095
ENSG00000137411.12	VARS2	var_31315663_A_T_rs9265968	157	28	0.617637	0.607692	0.447911	0.768095
ENSG00000137411.12	VARS2	var_31315706_G_A_rs9265969	157	29	0.618754	0.607361	0.286766	0.597413
ENSG00000137411.12	VARS2	var_31315792_T_C_rs9265971	157	28	0.617637	0.607692	0.447911	0.768095
ENSG00000137411.12	VARS2	var_31315805_G_C_rs9265972	157	28	0.617637	0.607692	0.447911	0.768095
ENSG00000137411.12	VARS2	var_31315861_G_A_rs9265973	157	28	0.617637	0.607692	0.447911	0.768095
ENSG00000137411.12	VARS2	var_31315879_T_G_rs9265974	157	28	0.617637	0.607692	0.447911	0.768095
ENSG00000137411.12	VARS2	var_31315933_A_G_rs9265976	157	28	0.617637	0.607692	0.447911	0.768095
ENSG00000137411.12	VARS2	var_31316044_C_T_rs9265979	157	28	0.617637	0.607692	0.447911	0.768095
ENSG00000137411.12	VARS2	var_31316080_C_T_rs9265982	157	28	0.617637	0.607692	0.447911	0.768095
ENSG00000137411.12	VARS2	var_31316234_A_C_rs9265985	157	28	0.617637	0.607692	0.447911	0.768095
ENSG00000137411.12	VARS2	var_31316448_T_A_rs9265990	157	27	0.617	0.607901	0.571953	0.88287
ENSG00000137411.12	VARS2	var_31316520_G_A_rs9265993	157	27	0.617	0.607901	0.571953	0.88287
ENSG00000137411.12	VARS2	var_31316526_T_C_rs9265994	157	27	0.619128	0.607459	0.343835	0.656452
ENSG00000137411.12	VARS2	var_31316613_G_A_rs9265998	157	26	0.617322	0.607906	0.578995	0.891677
ENSG00000137411.12	VARS2	var_31316695_C_A_rs9266001	157	28	0.619689	0.607247	0.256411	0.556112
ENSG00000137411.12	VARS2	var_31316911_G_T_rs2923008	157	28	0.619689	0.607247	0.256411	0.556112
ENSG00000137411.12	VARS2	var_31317063_A_G_rs3016017	157	28	0.617637	0.607692	0.447911	0.768095
ENSG00000137411.12	VARS2	var_31317065_T_C_rs2923007	157	28	0.617637	0.607692	0.447911	0.768095
ENSG00000137411.12	VARS2	var_31318308_G_T_rs2596510	157	28	0.617637	0.607692	0.447911	0.768095
ENSG00000137411.12	VARS2	var_31318432_T_C_rs2596508	157	28	0.617637	0.607692	0.447911	0.768095
ENSG00000137411.12	VARS2	var_31319215_G_C_rs2507995	156	39	0.609381	0.609233	0.664411	0.970679
ENSG00000137411.12	VARS2	var_31321267_A_C_rs2596500	157	28	0.619689	0.607247	0.256411	0.556112
ENSG00000137411.12	VARS2	var_31326074_A_T_rs2853999	157	28	0.619689	0.607247	0.256411	0.556112
ENSG00000137411.12	VARS2	var_31326703_T_C_rs2523593	157	28	0.619689	0.607247	0.256411	0.556112
ENSG00000137411.12	VARS2	var_31328988_C_G_rs2523573	157	28	0.619689	0.607247	0.256411	0.556112
ENSG00000137411.12	VARS2	var_31329374_A_C_rs2596545	157	28	0.619689	0.607247	0.256411	0.556112
ENSG00000137411.12	VARS2	var_31329642_C_T_rs2596547	157	28	0.619689	0.607247	0.256411	0.556112
ENSG00000137411.12	VARS2	var_31329691_T_A_rs2523571	157	28	0.619689	0.607247	0.256411	0.556112
ENSG00000137411.12	VARS2	var_31332920_G_A_rs2523546	157	30	0.61805	0.607438	0.363571	0.686825
ENSG00000137411.12	VARS2	var_31334422_T_C_rs2844577	157	30	0.61805	0.607438	0.363571	0.686825
ENSG00000137411.12	VARS2	var_31335431_T_C_rs2596430	157	30	0.61805	0.607438	0.363571	0.686825
ENSG00000137411.12	VARS2	var_31335901_A_G_rs2922994	157	30	0.61805	0.607438	0.363571	0.686825
ENSG00000137411.12	VARS2	var_31335976_G_C_rs2156874	157	28	0.619689	0.607247	0.256411	0.556112
ENSG00000137411.12	VARS2	var_31338844_T_C_rs2853986	157	28	0.619689	0.607247	0.256411	0.556112
ENSG00000137411.12	VARS2	var_31339996_G_A_rs2523524	157	30	0.61805	0.607438	0.363571	0.686825
ENSG00000137411.12	VARS2	var_31340075_C_T_rs2844559	157	30	0.61805	0.607438	0.363571	0.686825
ENSG00000137411.12	VARS2	var_31344390_A_G_rs2905719	157	30	0.61805	0.607438	0.363571	0.686825
ENSG00000137411.12	VARS2	var_31346653_A_G_rs2442735	157	30	0.61805	0.607438	0.363571	0.686825
ENSG00000137411.12	VARS2	var_31346849_CG_C_rs373067406	157	30	0.61805	0.607438	0.363571	0.686825
ENSG00000137411.12	VARS2	var_31346850_G_*_.	157	30	0.61805	0.607438	0.363571	0.686825
ENSG00000137411.12	VARS2	var_31348040_T_C_rs2596570	157	42	0.609927	0.609297	0.76162	1
ENSG00000137411.12	VARS2	var_31348077_G_A_rs9266669	157	40	0.605299	0.61089	0.709422	1
ENSG00000137411.12	VARS2	var_31348365_G_A_rs4143332	157	28	0.619689	0.607247	0.256411	0.556112
ENSG00000137411.12	VARS2	var_31348519_A_G_rs4143333	157	30	0.61805	0.607438	0.363571	0.686825
ENSG00000137411.12	VARS2	var_31348830_TA_T_rs200032555	156	29	0.617715	0.607879	0.471663	0.79586
ENSG00000137411.12	VARS2	var_31348832_TA_T_rs200965092	156	29	0.617715	0.607879	0.471663	0.79586
ENSG00000137411.12	VARS2	var_31353171_A_G_rs2844531	157	28	0.619689	0.607247	0.256411	0.556112
ENSG00000137411.12	VARS2	var_31353329_G_A_rs2596565	157	28	0.619689	0.607247	0.256411	0.556112
ENSG00000137411.12	VARS2	var_31353435_C_G_rs2844530	157	28	0.619689	0.607247	0.256411	0.556112
ENSG00000137411.12	VARS2	var_31360663_C_T_rs2428481	154	26	0.618568	0.608375	0.49799	0.810102
ENSG00000137411.12	VARS2	var_31363431_AAAAC_A_rs10649173	157	29	0.618767	0.607358	0.318573	0.633863
ENSG00000137411.12	VARS2	var_31377978_C_T_rs2523495	157	28	0.619689	0.607247	0.256411	0.556112
ENSG00000137411.12	VARS2	var_31386131_G_A_rs3132472	157	28	0.619689	0.607247	0.256411	0.556112
ENSG00000137411.12	VARS2	var_31408329_T_A_rs3132473	157	28	0.619689	0.607247	0.256411	0.556112
ENSG00000137411.12	VARS2	var_31410521_A_G_rs3093958	157	27	0.622469	0.606765	0.0972531	0.303755
ENSG00000137411.12	VARS2	var_31414051_CTTTTT_C_.	157	27	0.622469	0.606765	0.0972531	0.303755
ENSG00000137411.12	VARS2	var_31414241_G_T_rs9267092	157	29	0.619928	0.607095	0.207761	0.495209
ENSG00000137411.12	VARS2	var_31426619_C_T_rs2516430	157	91	0.611919	0.606083	0.0957103	0.300332
ENSG00000137411.12	VARS2	var_31428746_C_CATAG_rs9281490	157	39	0.614443	0.607821	0.549031	0.8584
ENSG00000137411.12	VARS2	var_31430010_G_A_rs3132089	157	29	0.619928	0.607095	0.207761	0.495209
ENSG00000137411.12	VARS2	var_31430065_C_T_rs3099839	157	29	0.619928	0.607095	0.207761	0.495209
ENSG00000137411.12	VARS2	var_31430694_G_C_rs3094605	157	29	0.619928	0.607095	0.207761	0.495209
ENSG00000137411.12	VARS2	var_31430752_G_A_rs3132090	157	29	0.619928	0.607095	0.207761	0.495209
ENSG00000137411.12	VARS2	var_31431813_A_G_rs3130907	157	29	0.619928	0.607095	0.207761	0.495209
ENSG00000137411.12	VARS2	var_31433693_T_C_rs3128986	157	29	0.619928	0.607095	0.207761	0.495209
ENSG00000137411.12	VARS2	var_31434331_A_T_rs3131619	157	29	0.619928	0.607095	0.207761	0.495209
ENSG00000137411.12	VARS2	var_31434366_G_A_rs3094013	157	29	0.619928	0.607095	0.207761	0.495209
ENSG00000137411.12	VARS2	var_31434520_G_C_rs3094012	157	29	0.622471	0.606519	0.0736186	0.251104
ENSG00000137411.12	VARS2	var_31434621_A_G_rs3131618	157	27	0.622469	0.606765	0.0972531	0.303755
ENSG00000146112.7	PPP1R18	var_30663568_T_G_rs11752408	17	4	0.688313	0.685183	0.870588	1
ENSG00000146112.7	PPP1R18	var_30700497_A_G_rs9262155	17	4	0.688313	0.685183	0.870588	1
ENSG00000168394.9	TAP1	var_31236115_C_T_rs2853951	61	24	0.588843	0.590955	0.644347	0.953472
ENSG00000168394.9	TAP1	var_31236690_T_G_rs1130592	61	20	0.584792	0.592725	0.708959	1
ENSG00000168394.9	TAP1	var_31236715_GC_G_.	61	21	0.585563	0.592519	0.803845	1
ENSG00000168394.9	TAP1	var_31236722_C_T_rs1094	61	21	0.585563	0.592519	0.803845	1
ENSG00000168394.9	TAP1	var_31237014_G_A_rs3998381	61	20	0.584792	0.592725	0.708959	1
ENSG00000168394.9	TAP1	var_31237017_C_T_rs2394960	61	20	0.584923	0.592661	0.720337	1
ENSG00000168394.9	TAP1	var_31237027_C_T_rs2394961	61	20	0.584923	0.592661	0.720337	1
ENSG00000168394.9	TAP1	var_31237048_A_G_rs9264594	61	20	0.584792	0.592725	0.708959	1
ENSG00000168394.9	TAP1	var_31237061_C_T_rs2894204	61	23	0.583201	0.594315	0.549574	0.859206
ENSG00000168394.9	TAP1	var_31237124_T_C_rs1130838	61	20	0.584792	0.592725	0.708959	1
ENSG00000168394.9	TAP1	var_31237162_C_G_rs35708511	61	20	0.584792	0.592725	0.708959	1
ENSG00000168394.9	TAP1	var_31237230_A_G_rs9264596	61	20	0.584792	0.592725	0.708959	1
ENSG00000168394.9	TAP1	var_31237233_A_G_rs9264597	61	20	0.584923	0.592661	0.720337	1
ENSG00000168394.9	TAP1	var_31237255_G_A_rs2523609	61	22	0.583138	0.594065	0.607074	0.913733
ENSG00000168394.9	TAP1	var_31237323_A_G_rs68094471	61	20	0.584792	0.592725	0.708959	1
ENSG00000168394.9	TAP1	var_31237333_T_A_rs66772001	61	20	0.584792	0.592725	0.708959	1
ENSG00000168394.9	TAP1	var_31237353_T_C_rs67827555	61	20	0.584792	0.592725	0.708959	1
ENSG00000168394.9	TAP1	var_31237405_C_T_rs56010430	61	20	0.584792	0.592725	0.708959	1
ENSG00000168394.9	TAP1	var_31237437_T_C_rs66459704	61	20	0.584792	0.592725	0.708959	1
ENSG00000168394.9	TAP1	var_31237449_T_C_rs68037221	61	20	0.584792	0.592725	0.708959	1
ENSG00000168394.9	TAP1	var_31237463_C_G_rs66620546	61	20	0.584792	0.592725	0.708959	1
ENSG00000168394.9	TAP1	var_31237526_C_CA_rs9281299	61	20	0.584923	0.592661	0.720337	1
ENSG00000168394.9	TAP1	var_31237563_C_T_rs3819287	61	20	0.584792	0.592725	0.708959	1
ENSG00000168394.9	TAP1	var_31237575_TCA_T_rs372183108	61	20	0.584792	0.592725	0.708959	1
ENSG00000168394.9	TAP1	var_31237592_A_C_rs9264606	61	20	0.584792	0.592725	0.708959	1
ENSG00000168394.9	TAP1	var_31237660_A_G_rs9264608	61	20	0.584792	0.592725	0.708959	1
ENSG00000168394.9	TAP1	var_31237876_A_G_rs9264622	61	20	0.584792	0.592725	0.708959	1
ENSG00000168394.9	TAP1	var_31237931_CAGA_C_rs67298404	61	20	0.584923	0.592661	0.720337	1
ENSG00000168394.9	TAP1	var_31238297_C_T_rs9264636	61	20	0.584792	0.592725	0.708959	1
ENSG00000168394.9	TAP1	var_31238318_G_A_rs9264638	61	20	0.584923	0.592661	0.720337	1
ENSG00000168394.9	TAP1	var_31238372_C_G_rs9264640	61	20	0.584792	0.592725	0.708959	1
ENSG00000168394.9	TAP1	var_31238492_C_A_rs9264643	61	20	0.584792	0.592725	0.708959	1
ENSG00000168394.9	TAP1	var_31238524_G_A_rs9264645	61	20	0.584923	0.592661	0.720337	1
ENSG00000168394.9	TAP1	var_31238535_T_C_rs9264646	61	20	0.584923	0.592661	0.720337	1
ENSG00000168394.9	TAP1	var_31238613_A_G_rs9264647	61	20	0.584792	0.592725	0.708959	1
ENSG00000168394.9	TAP1	var_31238762_T_C_rs9264652	61	20	0.584792	0.592725	0.708959	1
ENSG00000168394.9	TAP1	var_31239227_C_T_rs9264664	61	20	0.584923	0.592661	0.720337	1
ENSG00000168394.9	TAP1	var_31239270_GATCCA_G_.	61	20	0.584792	0.592725	0.708959	1
ENSG00000168394.9	TAP1	var_31239802_C_G_rs1050451	61	20	0.584792	0.592725	0.708959	1
ENSG00000168394.9	TAP1	var_31239827_C_T_rs2308525	61	20	0.584923	0.592661	0.720337	1
ENSG00000168394.9	TAP1	var_31239855_C_G_rs7767581	61	20	0.584792	0.592725	0.708959	1
ENSG00000168394.9	TAP1	var_31239868_G_C_rs9264674	61	20	0.584792	0.592725	0.708959	1
ENSG00000168394.9	TAP1	var_31240180_A_C_rs2524093	61	20	0.584792	0.592725	0.708959	1
ENSG00000168394.9	TAP1	var_31240307_TACCTC_T_rs374915880	61	21	0.583629	0.593534	0.582451	0.893688
ENSG00000168394.9	TAP1	var_31240712_A_C_rs2249741	61	25	0.583403	0.594792	0.565125	0.876604
ENSG00000168394.9	TAP1	var_31242089_A_T_rs2524080	61	19	0.585658	0.592144	0.763404	1
ENSG00000168394.9	TAP1	var_31242223_C_G_rs2844619	61	22	0.583258	0.593998	0.617548	0.926868
ENSG00000168394.9	TAP1	var_31252396_A_C_rs2524054	61	15	0.582589	0.592581	0.544876	0.853295
ENSG00000168394.9	TAP1	var_31257511_A_C_rs2853928	61	15	0.582589	0.592581	0.544876	0.853295
ENSG00000168394.9	TAP1	var_31263510_T_C_rs2524143	61	15	0.582589	0.592581	0.544876	0.853295
ENSG00000168394.9	TAP1	var_31263522_C_G_rs2524142	61	15	0.582589	0.592581	0.544876	0.853295
ENSG00000168394.9	TAP1	var_31264133_G_C_rs2524139	61	15	0.582589	0.592581	0.544876	0.853295
ENSG00000168394.9	TAP1	var_31265135_C_G_rs2524129	61	15	0.582589	0.592581	0.544876	0.853295
ENSG00000168394.9	TAP1	var_31265490_T_C_rs2247056	61	15	0.582589	0.592581	0.544876	0.853295
ENSG00000168394.9	TAP1	var_31267422_A_C_rs2524060	61	15	0.582589	0.592581	0.544876	0.853295
ENSG00000168394.9	TAP1	var_31270103_CTG_C_rs35261767	61	15	0.582589	0.592581	0.544876	0.853295
ENSG00000168394.9	TAP1	var_31271567_A_G_rs7750963	61	15	0.582589	0.592581	0.544876	0.853295
ENSG00000168394.9	TAP1	var_31272261_C_T_rs6457374	61	15	0.582589	0.592581	0.544876	0.853295
ENSG00000168394.9	TAP1	var_31276760_T_C_rs1005598	58	20	0.58587	0.593543	0.764163	1
ENSG00000168394.9	TAP1	var_31276777_A_G_rs1634791	58	20	0.58587	0.593543	0.764163	1
ENSG00000168394.9	TAP1	var_31277087_G_A_rs1634789	58	20	0.58587	0.593543	0.764163	1
ENSG00000168394.9	TAP1	var_31320870_C_CTGA_.	61	24	0.587422	0.591877	0.97079	1
ENSG00000168394.9	TAP1	var_31373260_G_C_rs2442714	61	30	0.578881	0.601005	0.148024	0.390176
ENSG00000168394.9	TAP1	var_31380340_C_T_rs2844514	61	27	0.582893	0.595867	0.466189	0.790306
ENSG00000168394.9	TAP1	var_31380583_A_G_rs2256184	61	27	0.582893	0.595867	0.466189	0.790306
ENSG00000168394.9	TAP1	var_31381351_A_G_rs2853968	61	27	0.582893	0.595867	0.466189	0.790306
ENSG00000168394.9	TAP1	var_31385629_T_G_rs2848711	61	27	0.582893	0.595867	0.466189	0.790306
ENSG00000168394.9	TAP1	var_31388214_G_A_rs2844513	61	27	0.582893	0.595867	0.466189	0.790306
ENSG00000168394.9	TAP1	var_31390139_T_TA_.	61	27	0.582893	0.595867	0.466189	0.790306
ENSG00000168394.9	TAP1	var_31542963_G_A_rs1800750	61	1	0.537198	0.591006	1	1
ENSG00000168394.9	TAP1	var_31559917_CCT_C_.	61	1	0.537198	0.591006	1	1
ENSG00000168394.9	TAP1	var_31561135_G_A_.	61	1	0.537198	0.591006	1	1
ENSG00000168394.9	TAP1	var_31564299_G_A_rs9267508	61	1	0.537198	0.591006	1	1
ENSG00000168394.9	TAP1	var_31566363_T_C_rs9267510	61	1	0.537198	0.591006	1	1
ENSG00000168394.9	TAP1	var_31568419_T_C_rs9267512	61	1	0.537198	0.591006	1	1
ENSG00000168394.9	TAP1	var_32341353_G_A_rs9268402	61	31	0.6067	0.572996	0.0120925	0.0725334
[truncated: 37,892 more rows]
