# Supplementary material for: Systematic genetic analysis of the MHC region reveals mechanistic underpinnings of HLA type associations with disease
Source: eLife journal article supplement (doi:10.7554/elife.48476), 2019-11-20
Supplement: supp [file elife-48476-supp-v1.zip › elife_poa_e48476_Supplementary_file_9.xlsx]

## Sheet: Table S9A - self
eGene information		HLA allele					HLA-QTL
Gene ID	Gene name	HLA gene	Allele	HWE	Type	Allelic frequency	Beta	Standard error of beta	p-value	Benjamini-Hochberg-adjusted p-value
ENSG00000206503.7	HLA-A	HLA-A	A.01_01_01_01	Yes	primary	0.161098	0.373095	0.195891	0.056831	0.113575
ENSG00000206503.7	HLA-A	HLA-A	A.02_01_01_01	Yes	primary	0.218377	-0.777407	0.153009	3.75874e-07	3.80334e-06
ENSG00000206503.7	HLA-A	HLA-A	A.02_06_01_01	Yes	primary	0.0107399	-1.00756	0.598003	0.0920133	0.162041
ENSG00000206503.7	HLA-A	HLA-A	A.02_07_01	Yes	primary	0.0131265	-0.347521	0.882009	0.693573	0.784415
ENSG00000206503.7	HLA-A	HLA-A	A.03_01_01_01	Yes	primary	0.103819	1.10492	0.204373	6.43018e-08	7.38234e-07
ENSG00000206503.7	HLA-A	HLA-A	A.11_01_01_01	Yes	primary	0.0942721	-0.14945	0.237188	0.528635	0.650712
ENSG00000206503.7	HLA-A	HLA-A	A.23_01_01_01	Yes	primary	0.0167064	0.220242	0.482938	0.648357	0.748683
ENSG00000206503.7	HLA-A	HLA-A	A.24_02_01_01	Yes	primary	0.107399	1.2154	0.200756	1.41208e-09	2.16156e-08
ENSG00000206503.7	HLA-A	HLA-A	A.25_01_01_01	Yes	primary	0.0131265	-0.310825	0.561707	0.580018	0.695298
ENSG00000206503.7	HLA-A	HLA-A	A.26_01_01_01	Yes	primary	0.0238663	-1.44548	0.377996	0.000131273	0.000664154
ENSG00000206503.7	HLA-A	HLA-A	A.29_02_01_01	Yes	primary	0.022673	-1.29708	0.408884	0.00151267	0.00537539
ENSG00000206503.7	HLA-A	HLA-A	A.30_01_01	Yes	primary	0.0119332	0.26969	0.708378	0.703415	0.791747
ENSG00000206503.7	HLA-A	HLA-A	A.31_01_02_01	Yes	primary	0.0202864	-0.640566	0.446602	0.151484	0.247093
ENSG00000206503.7	HLA-A	HLA-A	A.32_01_01_01	Yes	primary	0.0369928	-1.42932	0.354519	5.53716e-05	0.000308938
ENSG00000206503.7	HLA-A	HLA-A	A.33_01_01_01	Yes	primary	0.0143198	0.16055	0.605634	0.790937	0.860089
ENSG00000206503.7	HLA-A	HLA-A	A.68_01_02_02	Yes	primary	0.0107399	-0.108409	0.629415	0.86325	0.911442
ENSG00000234745.5	HLA-B	HLA-B	B.07_02_01_01	Yes	conditional on the lead primary SNP eQTL	0.0859189	0.124288	0.21068	0.555233	0.677862
ENSG00000234745.5	HLA-B	HLA-B	B.07_02_01_01	Yes	conditional on the lead primary, conditional 1 and conditional 2 SNP eQTL	0.0859189	-0.120091	0.21853	0.582636	0.695667
ENSG00000234745.5	HLA-B	HLA-B	B.07_02_01_01	Yes	primary	0.0859189	-0.0927144	0.213277	0.66377	0.759256
ENSG00000234745.5	HLA-B	HLA-B	B.07_02_01_01	Yes	conditional on the lead primary and conditional 1 SNP eQTL	0.0859189	0.00789737	0.220094	0.971377	0.981238
ENSG00000234745.5	HLA-B	HLA-B	B.08_01_01_01	Yes	conditional on the lead primary SNP eQTL	0.101432	0.422826	0.215351	0.0495968	0.10281
ENSG00000234745.5	HLA-B	HLA-B	B.08_01_01_01	Yes	primary	0.101432	0.311696	0.230476	0.176247	0.278358
ENSG00000234745.5	HLA-B	HLA-B	B.08_01_01_01	Yes	conditional on the lead primary and conditional 1 SNP eQTL	0.101432	0.152407	0.217179	0.482831	0.609408
ENSG00000234745.5	HLA-B	HLA-B	B.08_01_01_01	Yes	conditional on the lead primary, conditional 1 and conditional 2 SNP eQTL	0.101432	0.0202768	0.218799	0.926163	0.954956
ENSG00000234745.5	HLA-B	HLA-B	B.13_02_01_01	Yes	conditional on the lead primary and conditional 1 SNP eQTL	0.0178998	1.38624	0.484229	0.00419945	0.012662
ENSG00000234745.5	HLA-B	HLA-B	B.13_02_01_01	Yes	conditional on the lead primary SNP eQTL	0.0178998	1.25317	0.445589	0.00491754	0.01431
ENSG00000234745.5	HLA-B	HLA-B	B.13_02_01_01	Yes	conditional on the lead primary, conditional 1 and conditional 2 SNP eQTL	0.0178998	1.27547	0.478101	0.00763509	0.0204401
ENSG00000234745.5	HLA-B	HLA-B	B.13_02_01_01	Yes	primary	0.0178998	1.20586	0.491148	0.0140813	0.0349728
ENSG00000234745.5	HLA-B	HLA-B	B.14_02_01_01	Yes	primary	0.0357995	2.82175	0.328255	1.11022e-16	9.60126e-14
ENSG00000234745.5	HLA-B	HLA-B	B.14_02_01_01	Yes	conditional on the lead primary and conditional 1 SNP eQTL	0.0357995	1.04253	0.953104	0.27403	0.393007
ENSG00000234745.5	HLA-B	HLA-B	B.14_02_01_01	Yes	conditional on the lead primary, conditional 1 and conditional 2 SNP eQTL	0.0357995	0.986015	0.934601	0.29142	0.411295
ENSG00000234745.5	HLA-B	HLA-B	B.14_02_01_01	Yes	conditional on the lead primary SNP eQTL	0.0357995	0.831563	0.960515	0.386629	0.512928
ENSG00000234745.5	HLA-B	HLA-B	B.15_01_01_01	Yes	conditional on the lead primary SNP eQTL	0.0572792	-0.904714	0.22579	6.15277e-05	0.000336991
ENSG00000234745.5	HLA-B	HLA-B	B.15_01_01_01	Yes	primary	0.0572792	-0.87629	0.239655	0.00025572	0.00113085
ENSG00000234745.5	HLA-B	HLA-B	B.15_01_01_01	Yes	conditional on the lead primary and conditional 1 SNP eQTL	0.0572792	-0.607914	0.242288	0.0121055	0.0310658
ENSG00000234745.5	HLA-B	HLA-B	B.15_01_01_01	Yes	conditional on the lead primary, conditional 1 and conditional 2 SNP eQTL	0.0572792	-0.544715	0.239429	0.0229026	0.0529956
ENSG00000234745.5	HLA-B	HLA-B	B.18_01_01_01	Yes	conditional on the lead primary SNP eQTL	0.0119332	-1.10605	0.524135	0.0348387	0.0750855
ENSG00000234745.5	HLA-B	HLA-B	B.18_01_01_01	Yes	primary	0.0119332	-1.11452	0.572038	0.0513754	0.105038
ENSG00000234745.5	HLA-B	HLA-B	B.18_01_01_01	Yes	conditional on the lead primary and conditional 1 SNP eQTL	0.0119332	-0.546702	0.536784	0.308452	0.430247
ENSG00000234745.5	HLA-B	HLA-B	B.18_01_01_01	Yes	conditional on the lead primary, conditional 1 and conditional 2 SNP eQTL	0.0119332	-0.275875	0.533646	0.605182	0.71261
ENSG00000234745.5	HLA-B	HLA-B	B.18_01_01_02	Yes	conditional on the lead primary SNP eQTL	0.0107399	-0.579287	0.532614	0.276759	0.395275
ENSG00000234745.5	HLA-B	HLA-B	B.18_01_01_02	Yes	conditional on the lead primary, conditional 1 and conditional 2 SNP eQTL	0.0107399	-0.409718	0.528934	0.43857	0.565499
ENSG00000234745.5	HLA-B	HLA-B	B.18_01_01_02	Yes	conditional on the lead primary and conditional 1 SNP eQTL	0.0107399	-0.311786	0.538841	0.562843	0.684353
ENSG00000234745.5	HLA-B	HLA-B	B.18_01_01_02	Yes	primary	0.0107399	-0.0928247	0.528568	0.860596	0.911442
ENSG00000234745.5	HLA-B	HLA-B	B.18_01_01_05	Yes	conditional on the lead primary, conditional 1 and conditional 2 SNP eQTL	0.0178998	-1.50261	0.382802	8.66254e-05	0.000461949
ENSG00000234745.5	HLA-B	HLA-B	B.18_01_01_05	Yes	primary	0.0178998	-1.53416	0.415742	0.000224096	0.0010371
ENSG00000234745.5	HLA-B	HLA-B	B.18_01_01_05	Yes	conditional on the lead primary and conditional 1 SNP eQTL	0.0178998	-1.27073	0.385984	0.000994144	0.00373273
ENSG00000234745.5	HLA-B	HLA-B	B.18_01_01_05	Yes	conditional on the lead primary SNP eQTL	0.0178998	-1.24975	0.395274	0.00156826	0.00550737
ENSG00000234745.5	HLA-B	HLA-B	B.27_05_02_01	Yes	primary	0.0178998	-0.87758	0.482092	0.0687043	0.130626
ENSG00000234745.5	HLA-B	HLA-B	B.27_05_02_01	Yes	conditional on the lead primary and conditional 1 SNP eQTL	0.0178998	0.289145	0.489489	0.554717	0.677862
ENSG00000234745.5	HLA-B	HLA-B	B.27_05_02_01	Yes	conditional on the lead primary, conditional 1 and conditional 2 SNP eQTL	0.0178998	0.273702	0.480402	0.568857	0.687465
ENSG00000234745.5	HLA-B	HLA-B	B.27_05_02_01	Yes	conditional on the lead primary SNP eQTL	0.0178998	-0.150217	0.456476	0.742095	0.820428
ENSG00000234745.5	HLA-B	HLA-B	B.27_05_02_05	Yes	primary	0.0298329	-1.27295	0.361023	0.000421963	0.00176162
ENSG00000234745.5	HLA-B	HLA-B	B.27_05_02_05	Yes	conditional on the lead primary SNP eQTL	0.0298329	-1.07897	0.345107	0.00176913	0.00600098
ENSG00000234745.5	HLA-B	HLA-B	B.27_05_02_05	Yes	conditional on the lead primary, conditional 1 and conditional 2 SNP eQTL	0.0298329	-0.715379	0.348816	0.0402786	0.0858798
ENSG00000234745.5	HLA-B	HLA-B	B.27_05_02_05	Yes	conditional on the lead primary and conditional 1 SNP eQTL	0.0298329	-0.666023	0.354045	0.0599471	0.117339
ENSG00000234745.5	HLA-B	HLA-B	B.35_01_01_05	Yes	conditional on the lead primary SNP eQTL	0.0656325	0.621604	0.253961	0.0143799	0.0354743
ENSG00000234745.5	HLA-B	HLA-B	B.35_01_01_05	Yes	primary	0.0656325	0.693126	0.286262	0.0154653	0.0378392
ENSG00000234745.5	HLA-B	HLA-B	B.35_01_01_05	Yes	conditional on the lead primary and conditional 1 SNP eQTL	0.0656325	0.42391	0.305458	0.165203	0.264413
ENSG00000234745.5	HLA-B	HLA-B	B.35_01_01_05	Yes	conditional on the lead primary, conditional 1 and conditional 2 SNP eQTL	0.0656325	0.276002	0.306331	0.367591	0.495377
ENSG00000234745.5	HLA-B	HLA-B	B.35_03_01_03	Yes	conditional on the lead primary, conditional 1 and conditional 2 SNP eQTL	0.0119332	1.35168	0.675485	0.0453869	0.0957455
ENSG00000234745.5	HLA-B	HLA-B	B.35_03_01_03	Yes	conditional on the lead primary and conditional 1 SNP eQTL	0.0119332	1.20912	0.683097	0.0767172	0.143574
ENSG00000234745.5	HLA-B	HLA-B	B.35_03_01_03	Yes	conditional on the lead primary SNP eQTL	0.0119332	1.08328	0.64501	0.0930585	0.162921
ENSG00000234745.5	HLA-B	HLA-B	B.35_03_01_03	Yes	primary	0.0119332	0.950969	0.71547	0.183798	0.286494
ENSG00000234745.5	HLA-B	HLA-B	B.37_01_01_01	Yes	conditional on the lead primary, conditional 1 and conditional 2 SNP eQTL	0.0107399	0.331365	0.591838	0.575554	0.694152
ENSG00000234745.5	HLA-B	HLA-B	B.37_01_01_01	Yes	primary	0.0107399	-0.285356	0.654568	0.662876	0.759256
ENSG00000234745.5	HLA-B	HLA-B	B.37_01_01_01	Yes	conditional on the lead primary SNP eQTL	0.0107399	-0.0900044	0.620219	0.884618	0.924899
ENSG00000234745.5	HLA-B	HLA-B	B.37_01_01_01	Yes	conditional on the lead primary and conditional 1 SNP eQTL	0.0107399	0.00557654	0.594447	0.992515	0.995851
ENSG00000234745.5	HLA-B	HLA-B	B.38_01_01	Yes	conditional on the lead primary and conditional 1 SNP eQTL	0.0381862	-0.382236	0.32799	0.243861	0.36036
ENSG00000234745.5	HLA-B	HLA-B	B.38_01_01	Yes	conditional on the lead primary SNP eQTL	0.0381862	0.143242	0.329913	0.664157	0.759256
ENSG00000234745.5	HLA-B	HLA-B	B.38_01_01	Yes	primary	0.0381862	0.05004	0.369141	0.892171	0.92792
ENSG00000234745.5	HLA-B	HLA-B	B.38_01_01	Yes	conditional on the lead primary, conditional 1 and conditional 2 SNP eQTL	0.0381862	-0.0194648	0.346657	0.955222	0.971495
ENSG00000234745.5	HLA-B	HLA-B	B.40_01_02_01	Yes	conditional on the lead primary and conditional 1 SNP eQTL	0.0238663	0.458953	0.397368	0.248098	0.364814
ENSG00000234745.5	HLA-B	HLA-B	B.40_01_02_01	Yes	conditional on the lead primary SNP eQTL	0.0238663	0.326433	0.408607	0.424353	0.549542
ENSG00000234745.5	HLA-B	HLA-B	B.40_01_02_01	Yes	conditional on the lead primary, conditional 1 and conditional 2 SNP eQTL	0.0238663	0.291834	0.39522	0.460266	0.587054
ENSG00000234745.5	HLA-B	HLA-B	B.40_01_02_01	Yes	primary	0.0238663	0.0316985	0.451791	0.944065	0.966343
ENSG00000234745.5	HLA-B	HLA-B	B.40_01_02_04	Yes	conditional on the lead primary and conditional 1 SNP eQTL	0.0298329	0.708506	0.349776	0.042806	0.0909437
ENSG00000234745.5	HLA-B	HLA-B	B.40_01_02_04	Yes	conditional on the lead primary SNP eQTL	0.0298329	0.580915	0.342846	0.0901909	0.16025
ENSG00000234745.5	HLA-B	HLA-B	B.40_01_02_04	Yes	conditional on the lead primary, conditional 1 and conditional 2 SNP eQTL	0.0298329	0.558671	0.349468	0.109902	0.188539
ENSG00000234745.5	HLA-B	HLA-B	B.40_01_02_04	Yes	primary	0.0298329	0.314753	0.37329	0.399125	0.527136
ENSG00000234745.5	HLA-B	HLA-B	B.40_02_01_01	Yes	conditional on the lead primary and conditional 1 SNP eQTL	0.0178998	3.83681	0.501264	1.94289e-14	7.24941e-13
ENSG00000234745.5	HLA-B	HLA-B	B.40_02_01_01	Yes	conditional on the lead primary, conditional 1 and conditional 2 SNP eQTL	0.0178998	3.76778	0.492952	2.12053e-14	7.44679e-13
ENSG00000234745.5	HLA-B	HLA-B	B.40_02_01_01	Yes	conditional on the lead primary SNP eQTL	0.0178998	3.1053	0.519436	2.25613e-09	3.36727e-08
ENSG00000234745.5	HLA-B	HLA-B	B.40_02_01_01	Yes	primary	0.0178998	2.80869	0.512359	4.20846e-08	5.0249e-07
ENSG00000234745.5	HLA-B	HLA-B	B.44_02_01_01	Yes	conditional on the lead primary and conditional 1 SNP eQTL	0.0680191	-0.715163	0.238723	0.00273738	0.00873914
ENSG00000234745.5	HLA-B	HLA-B	B.44_02_01_01	Yes	conditional on the lead primary, conditional 1 and conditional 2 SNP eQTL	0.0680191	-0.639162	0.236829	0.00695815	0.0187965
ENSG00000234745.5	HLA-B	HLA-B	B.44_02_01_01	Yes	primary	0.0680191	-0.450476	0.245443	0.0664524	0.127582
ENSG00000234745.5	HLA-B	HLA-B	B.44_02_01_01	Yes	conditional on the lead primary SNP eQTL	0.0680191	-0.406674	0.234526	0.0829137	0.151465
ENSG00000234745.5	HLA-B	HLA-B	B.44_03_01_01	Yes	conditional on the lead primary and conditional 1 SNP eQTL	0.0274463	-0.693551	0.378194	0.0666762	0.127582
ENSG00000234745.5	HLA-B	HLA-B	B.44_03_01_01	Yes	conditional on the lead primary SNP eQTL	0.0274463	-0.481907	0.351307	0.17014	0.270142
ENSG00000234745.5	HLA-B	HLA-B	B.44_03_01_01	Yes	conditional on the lead primary, conditional 1 and conditional 2 SNP eQTL	0.0274463	-0.489512	0.378401	0.195793	0.299713
ENSG00000234745.5	HLA-B	HLA-B	B.44_03_01_01	Yes	primary	0.0274463	-0.468633	0.363117	0.196848	0.300558
ENSG00000234745.5	HLA-B	HLA-B	B.45_01_01	Yes	conditional on the lead primary and conditional 1 SNP eQTL	0.0119332	1.9664	0.661813	0.00296601	0.00936882
ENSG00000234745.5	HLA-B	HLA-B	B.45_01_01	Yes	primary	0.0119332	2.12868	0.744935	0.00426945	0.0128083
ENSG00000234745.5	HLA-B	HLA-B	B.45_01_01	Yes	conditional on the lead primary, conditional 1 and conditional 2 SNP eQTL	0.0119332	1.80794	0.654228	0.00571907	0.0161051
ENSG00000234745.5	HLA-B	HLA-B	B.45_01_01	Yes	conditional on the lead primary SNP eQTL	0.0119332	1.19563	0.665487	0.0723943	0.136339
ENSG00000234745.5	HLA-B	HLA-B	B.46_01_01	Yes	primary	0.0143198	-1.78475	0.707772	0.0116805	0.0301874
ENSG00000234745.5	HLA-B	HLA-B	B.46_01_01	Yes	conditional on the lead primary SNP eQTL	0.0143198	-1.41286	0.599139	0.0183661	0.0440345
ENSG00000234745.5	HLA-B	HLA-B	B.46_01_01	Yes	conditional on the lead primary and conditional 1 SNP eQTL	0.0143198	-1.39351	0.653787	0.0330521	0.072015
ENSG00000234745.5	HLA-B	HLA-B	B.46_01_01	Yes	conditional on the lead primary, conditional 1 and conditional 2 SNP eQTL	0.0143198	-1.1694	0.650118	0.072058	0.136135
ENSG00000234745.5	HLA-B	HLA-B	B.49_01_01_01	Yes	conditional on the lead primary and conditional 1 SNP eQTL	0.0202864	0.947963	0.431364	0.0279781	0.0638689
ENSG00000234745.5	HLA-B	HLA-B	B.49_01_01_01	Yes	conditional on the lead primary, conditional 1 and conditional 2 SNP eQTL	0.0202864	0.738127	0.430861	0.0866862	0.156349
ENSG00000234745.5	HLA-B	HLA-B	B.49_01_01_01	Yes	primary	0.0202864	0.758198	0.471677	0.107955	0.18627
ENSG00000234745.5	HLA-B	HLA-B	B.49_01_01_01	Yes	conditional on the lead primary SNP eQTL	0.0202864	0.139049	0.419896	0.74053	0.820215
ENSG00000234745.5	HLA-B	HLA-B	B.51_01_01_04	Yes	conditional on the lead primary SNP eQTL	0.0119332	0.365171	0.413449	0.377112	0.503659
ENSG00000234745.5	HLA-B	HLA-B	B.51_01_01_04	Yes	conditional on the lead primary, conditional 1 and conditional 2 SNP eQTL	0.0119332	0.250763	0.454538	0.581162	0.695298
ENSG00000234745.5	HLA-B	HLA-B	B.51_01_01_04	Yes	conditional on the lead primary and conditional 1 SNP eQTL	0.0119332	0.229833	0.463292	0.619833	0.724877
ENSG00000234745.5	HLA-B	HLA-B	B.51_01_01_04	Yes	primary	0.0119332	-0.043858	0.498631	0.929911	0.955519
ENSG00000234745.5	HLA-B	HLA-B	B.55_01_01	Yes	conditional on the lead primary, conditional 1 and conditional 2 SNP eQTL	0.0346062	-1.17055	0.311423	0.000170794	0.00083577
ENSG00000234745.5	HLA-B	HLA-B	B.55_01_01	Yes	conditional on the lead primary and conditional 1 SNP eQTL	0.0346062	-1.16315	0.316482	0.000237615	0.00108231
ENSG00000234745.5	HLA-B	HLA-B	B.55_01_01	Yes	conditional on the lead primary SNP eQTL	0.0346062	-1.14114	0.311637	0.000250484	0.00112435
ENSG00000234745.5	HLA-B	HLA-B	B.55_01_01	Yes	primary	0.0346062	-0.999602	0.337837	0.00308808	0.00970306
ENSG00000234745.5	HLA-B	HLA-B	B.57_01_01_01	Yes	primary	0.052506	-0.891807	0.275931	0.0012293	0.00444784
ENSG00000234745.5	HLA-B	HLA-B	B.57_01_01_01	Yes	conditional on the lead primary SNP eQTL	0.052506	-0.70207	0.260107	0.0069515	0.0187965
ENSG00000234745.5	HLA-B	HLA-B	B.57_01_01_01	Yes	conditional on the lead primary and conditional 1 SNP eQTL	0.052506	-0.412711	0.279078	0.139183	0.230173
ENSG00000234745.5	HLA-B	HLA-B	B.57_01_01_01	Yes	conditional on the lead primary, conditional 1 and conditional 2 SNP eQTL	0.052506	-0.157035	0.290576	0.588903	0.698956
ENSG00000204525.10	HLA-C	HLA-C	C.01_02_01_01	Yes	primary	0.0548926	-1.38628	0.284465	1.09751e-06	9.77933e-06
ENSG00000204525.10	HLA-C	HLA-C	C.01_02_01_01	Yes	conditional on the lead primary and conditional 1 SNP eQTL	0.0548926	-0.956704	0.274011	0.000480345	0.00196415
ENSG00000204525.10	HLA-C	HLA-C	C.01_02_01_01	Yes	conditional on the lead primary SNP eQTL	0.0548926	-0.895556	0.273471	0.00105748	0.00389701
ENSG00000204525.10	HLA-C	HLA-C	C.02_02_02_01	Yes	primary	0.0369928	-0.292536	0.30901	0.343798	0.469674
ENSG00000204525.10	HLA-C	HLA-C	C.02_02_02_01	Yes	conditional on the lead primary and conditional 1 SNP eQTL	0.0369928	0.177526	0.303962	0.559194	0.681304
ENSG00000204525.10	HLA-C	HLA-C	C.02_02_02_01	Yes	conditional on the lead primary SNP eQTL	0.0369928	-0.00847219	0.287263	0.976472	0.984214
ENSG00000204525.10	HLA-C	HLA-C	C.03_03_01_01	Yes	primary	0.0501193	-1.1231	0.270913	3.38927e-05	0.000203296
ENSG00000204525.10	HLA-C	HLA-C	C.03_03_01_01	Yes	conditional on the lead primary and conditional 1 SNP eQTL	0.0501193	-0.906513	0.256947	0.00041869	0.00176027
ENSG00000204525.10	HLA-C	HLA-C	C.03_03_01_01	Yes	conditional on the lead primary SNP eQTL	0.0501193	-0.792475	0.254992	0.00188461	0.00630949
ENSG00000204525.10	HLA-C	HLA-C	C.03_04_01_01	Yes	primary	0.0513126	-0.148135	0.271791	0.58573	0.696576
ENSG00000204525.10	HLA-C	HLA-C	C.03_04_01_01	Yes	conditional on the lead primary and conditional 1 SNP eQTL	0.0513126	-0.0637441	0.25634	0.803616	0.869128
ENSG00000204525.10	HLA-C	HLA-C	C.03_04_01_01	Yes	conditional on the lead primary SNP eQTL	0.0513126	0.0418557	0.250247	0.867167	0.911442
ENSG00000204525.10	HLA-C	HLA-C	C.03_04_01_02	Yes	conditional on the lead primary and conditional 1 SNP eQTL	0.0214797	-0.722145	0.338027	0.0326504	0.0716628
ENSG00000204525.10	HLA-C	HLA-C	C.03_04_01_02	Yes	conditional on the lead primary SNP eQTL	0.0214797	-0.631504	0.336821	0.0608069	0.118633
ENSG00000204525.10	HLA-C	HLA-C	C.03_04_01_02	Yes	primary	0.0214797	-0.575309	0.367182	0.117156	0.199266
ENSG00000204525.10	HLA-C	HLA-C	C.04_01_01_11	Yes	primary	0.0453461	-0.922059	0.296694	0.00188496	0.00630949
ENSG00000204525.10	HLA-C	HLA-C	C.04_01_01_11	Yes	conditional on the lead primary SNP eQTL	0.0453461	-0.624906	0.278216	0.0246965	0.056926
ENSG00000204525.10	HLA-C	HLA-C	C.04_01_01_11	Yes	conditional on the lead primary and conditional 1 SNP eQTL	0.0453461	-0.547699	0.284452	0.0541724	0.10926
ENSG00000204525.10	HLA-C	HLA-C	C.04_01_01_14	Yes	primary	0.071599	-0.398725	0.247071	0.106569	0.184411
ENSG00000204525.10	HLA-C	HLA-C	C.04_01_01_14	Yes	conditional on the lead primary SNP eQTL	0.071599	-0.106036	0.230067	0.644876	0.746517
ENSG00000204525.10	HLA-C	HLA-C	C.04_01_01_14	Yes	conditional on the lead primary and conditional 1 SNP eQTL	0.071599	0.0308726	0.243088	0.898939	0.931713
ENSG00000204525.10	HLA-C	HLA-C	C.05_01_01_01	Yes	conditional on the lead primary SNP eQTL	0.0143198	-1.57341	0.44452	0.000400778	0.0017338
ENSG00000204525.10	HLA-C	HLA-C	C.05_01_01_01	Yes	conditional on the lead primary and conditional 1 SNP eQTL	0.0143198	-1.56398	0.442648	0.000410495	0.00173805
ENSG00000204525.10	HLA-C	HLA-C	C.05_01_01_01	Yes	primary	0.0143198	-0.360574	0.471807	0.444724	0.572198
ENSG00000204525.10	HLA-C	HLA-C	C.05_01_01_02	Yes	primary	0.071599	-0.372372	0.232851	0.109779	0.188539
ENSG00000204525.10	HLA-C	HLA-C	C.05_01_01_02	Yes	conditional on the lead primary and conditional 1 SNP eQTL	0.071599	-0.243966	0.221743	0.271236	0.392316
ENSG00000204525.10	HLA-C	HLA-C	C.05_01_01_02	Yes	conditional on the lead primary SNP eQTL	0.071599	-0.137478	0.216036	0.524539	0.648343
ENSG00000204525.10	HLA-C	HLA-C	C.06_02_01_01	Yes	conditional on the lead primary and conditional 1 SNP eQTL	0.0954654	0.570572	0.227849	0.012274	0.0313145
ENSG00000204525.10	HLA-C	HLA-C	C.06_02_01_01	Yes	conditional on the lead primary SNP eQTL	0.0954654	0.289368	0.204474	0.157014	0.253345
ENSG00000204525.10	HLA-C	HLA-C	C.06_02_01_01	Yes	primary	0.0954654	-0.0208222	0.219149	0.924304	0.954687
ENSG00000204525.10	HLA-C	HLA-C	C.07_01_01_01	Yes	primary	0.0560859	1.78525	0.26203	9.5487e-12	2.28023e-10
ENSG00000204525.10	HLA-C	HLA-C	C.07_01_01_01	Yes	conditional on the lead primary SNP eQTL	0.0560859	1.15939	0.265843	1.29356e-05	9.90074e-05
ENSG00000204525.10	HLA-C	HLA-C	C.07_01_01_01	Yes	conditional on the lead primary and conditional 1 SNP eQTL	0.0560859	1.12391	0.26654	2.47938e-05	0.000166314
ENSG00000204525.10	HLA-C	HLA-C	C.07_01_01_16	Yes	conditional on the lead primary SNP eQTL	0.0787589	1.66137	0.205532	6.66134e-16	3.97682e-14
ENSG00000204525.10	HLA-C	HLA-C	C.07_01_01_16	Yes	conditional on the lead primary and conditional 1 SNP eQTL	0.0787589	1.67387	0.212933	3.77476e-15	1.73349e-13
ENSG00000204525.10	HLA-C	HLA-C	C.07_01_01_16	Yes	primary	0.0787589	1.4012	0.229175	9.70997e-10	1.56672e-08
ENSG00000204525.10	HLA-C	HLA-C	C.07_02_01_01	Yes	primary	0.0274463	1.49133	0.345927	1.62432e-05	0.000121215
ENSG00000204525.10	HLA-C	HLA-C	C.07_02_01_01	Yes	conditional on the lead primary and conditional 1 SNP eQTL	0.0274463	0.308491	0.368783	0.402866	0.528596
ENSG00000204525.10	HLA-C	HLA-C	C.07_02_01_01	Yes	conditional on the lead primary SNP eQTL	0.0274463	0.254188	0.368849	0.490736	0.61781
ENSG00000204525.10	HLA-C	HLA-C	C.07_02_01_03	Yes	primary	0.0894988	0.97874	0.203969	1.59872e-06	1.40358e-05
ENSG00000204525.10	HLA-C	HLA-C	C.07_02_01_03	Yes	conditional on the lead primary and conditional 1 SNP eQTL	0.0894988	-0.206411	0.255241	0.418692	0.545918
ENSG00000204525.10	HLA-C	HLA-C	C.07_02_01_03	Yes	conditional on the lead primary SNP eQTL	0.0894988	-0.175283	0.255596	0.492851	0.61781
ENSG00000204525.10	HLA-C	HLA-C	C.08_02_01_01	Yes	primary	0.0322196	-0.423959	0.344922	0.219018	0.329354
ENSG00000204525.10	HLA-C	HLA-C	C.08_02_01_01	Yes	conditional on the lead primary and conditional 1 SNP eQTL	0.0322196	-0.230184	0.326047	0.480197	0.607368
ENSG00000204525.10	HLA-C	HLA-C	C.08_02_01_01	Yes	conditional on the lead primary SNP eQTL	0.0322196	-0.111836	0.320889	0.727449	0.810237
ENSG00000204525.10	HLA-C	HLA-C	C.12_03_01_01	Yes	primary	0.0596659	-0.647178	0.253864	0.0107936	0.0282623
ENSG00000204525.10	HLA-C	HLA-C	C.12_03_01_01	Yes	conditional on the lead primary SNP eQTL	0.0596659	-0.371953	0.236849	0.116316	0.198402
ENSG00000204525.10	HLA-C	HLA-C	C.12_03_01_01	Yes	conditional on the lead primary and conditional 1 SNP eQTL	0.0596659	-0.25139	0.256496	0.327041	0.450909
ENSG00000204525.10	HLA-C	HLA-C	C.15_02_01_01	Yes	conditional on the lead primary SNP eQTL	0.0238663	0.610297	0.353867	0.0845905	0.153032
ENSG00000204525.10	HLA-C	HLA-C	C.15_02_01_01	Yes	conditional on the lead primary and conditional 1 SNP eQTL	0.0238663	0.555249	0.35481	0.117602	0.199456
ENSG00000204525.10	HLA-C	HLA-C	C.15_02_01_01	Yes	primary	0.0238663	0.321565	0.382785	0.400871	0.527136
ENSG00000204525.10	HLA-C	HLA-C	C.16_01_01_01	Yes	primary	0.0334129	-0.748904	0.325531	0.0214167	0.0505366
ENSG00000204525.10	HLA-C	HLA-C	C.16_01_01_01	Yes	conditional on the lead primary and conditional 1 SNP eQTL	0.0334129	-0.6009	0.302214	0.0467761	0.0978783
ENSG00000204525.10	HLA-C	HLA-C	C.16_01_01_01	Yes	conditional on the lead primary SNP eQTL	0.0334129	-0.507236	0.300728	0.0916625	0.162041
ENSG00000204257.10	HLA-DMA	HLA-DMA	DMA.01_01_01_01	Yes	primary	0.329356	-0.836891	0.124106	1.5479e-11	3.55421e-10
ENSG00000204257.10	HLA-DMA	HLA-DMA	DMA.01_01_01_01	Yes	conditional on the lead primary and conditional 1 SNP eQTL	0.329356	-0.635573	0.150406	2.38185e-05	0.000161587
ENSG00000204257.10	HLA-DMA	HLA-DMA	DMA.01_01_01_01	Yes	conditional on the lead primary SNP eQTL	0.329356	-0.129245	0.225631	0.56677	0.686332
ENSG00000204257.10	HLA-DMA	HLA-DMA	DMA.01_01_01_02	Yes	primary	0.321002	0.273122	0.139408	0.0500958	0.103485
ENSG00000204257.10	HLA-DMA	HLA-DMA	DMA.01_01_01_02	Yes	conditional on the lead primary SNP eQTL	0.321002	-0.282878	0.160394	0.0777917	0.144678
ENSG00000204257.10	HLA-DMA	HLA-DMA	DMA.01_01_01_02	Yes	conditional on the lead primary and conditional 1 SNP eQTL	0.321002	-0.0580824	0.163315	0.722105	0.805788
ENSG00000204257.10	HLA-DMA	HLA-DMA	DMA.01_01_01_03	Yes	conditional on the lead primary and conditional 1 SNP eQTL	0.0668258	0.608375	0.277914	0.0285912	0.0645205
ENSG00000204257.10	HLA-DMA	HLA-DMA	DMA.01_01_01_03	Yes	primary	0.0668258	0.474155	0.24944	0.0573177	0.113683
ENSG00000204257.10	HLA-DMA	HLA-DMA	DMA.01_01_01_03	Yes	conditional on the lead primary SNP eQTL	0.0668258	0.448007	0.266312	0.0925169	0.162449
ENSG00000204257.10	HLA-DMA	HLA-DMA	DMA.01_01_01_04	Yes	primary	0.109785	0.660366	0.210663	0.00172032	0.00593658
ENSG00000204257.10	HLA-DMA	HLA-DMA	DMA.01_01_01_04	Yes	conditional on the lead primary and conditional 1 SNP eQTL	0.109785	0.675518	0.248663	0.00659573	0.0180626
ENSG00000204257.10	HLA-DMA	HLA-DMA	DMA.01_01_01_04	Yes	conditional on the lead primary SNP eQTL	0.109785	0.414783	0.24308	0.0879411	0.15706
ENSG00000204257.10	HLA-DMA	HLA-DMA	DMA.01_02	Yes	primary	0.173031	0.426394	0.184154	0.0205897	0.0489724
ENSG00000204257.10	HLA-DMA	HLA-DMA	DMA.01_02	Yes	conditional on the lead primary and conditional 1 SNP eQTL	0.173031	0.405915	0.214621	0.0585822	0.115424
ENSG00000204257.10	HLA-DMA	HLA-DMA	DMA.01_02	Yes	conditional on the lead primary SNP eQTL	0.173031	0.00620896	0.221331	0.97762	0.984214
ENSG00000242574.4	HLA-DMB	HLA-DMB	DMB.01_01_01_01	No	primary	0.402148	-0.695041	0.107643	1.06863e-10	2.12656e-09
ENSG00000242574.4	HLA-DMB	HLA-DMB	DMB.01_01_01_01	No	conditional on the lead primary, conditional 1 and conditional 2 SNP eQTL	0.402148	-0.673554	0.105855	1.97877e-10	3.57977e-09
ENSG00000242574.4	HLA-DMB	HLA-DMB	DMB.01_01_01_01	No	conditional on the lead primary SNP eQTL	0.402148	-0.53304	0.126624	2.55797e-05	0.000169679
ENSG00000242574.4	HLA-DMB	HLA-DMB	DMB.01_01_01_02	Yes	conditional on the lead primary SNP eQTL	0.192124	-0.274649	0.158469	0.0830697	0.151465
ENSG00000242574.4	HLA-DMB	HLA-DMB	DMB.01_01_01_02	Yes	primary	0.192124	0.167707	0.153053	0.273191	0.393
ENSG00000242574.4	HLA-DMB	HLA-DMB	DMB.01_01_01_02	Yes	conditional on the lead primary, conditional 1 and conditional 2 SNP eQTL	0.192124	0.0509706	0.152212	0.737726	0.818629
ENSG00000242574.4	HLA-DMB	HLA-DMB	DMB.01_01_01_03	Yes	conditional on the lead primary SNP eQTL	0.0906921	0.417596	0.191772	0.029438	0.0660695
ENSG00000242574.4	HLA-DMB	HLA-DMB	DMB.01_01_01_03	Yes	conditional on the lead primary, conditional 1 and conditional 2 SNP eQTL	0.0906921	0.398651	0.2006	0.0468898	0.0978783
ENSG00000242574.4	HLA-DMB	HLA-DMB	DMB.01_01_01_03	Yes	primary	0.0906921	0.352485	0.206558	0.0879206	0.15706
ENSG00000242574.4	HLA-DMB	HLA-DMB	DMB.01_01_01_04	Yes	conditional on the lead primary SNP eQTL	0.0799523	0.37256	0.230049	0.105344	0.182821
ENSG00000242574.4	HLA-DMB	HLA-DMB	DMB.01_01_01_04	Yes	primary	0.0799523	0.158418	0.231418	0.493627	0.61781
ENSG00000242574.4	HLA-DMB	HLA-DMB	DMB.01_01_01_04	Yes	conditional on the lead primary, conditional 1 and conditional 2 SNP eQTL	0.0799523	0.126952	0.23781	0.593454	0.702961
ENSG00000242574.4	HLA-DMB	HLA-DMB	DMB.01_03_01_01	Yes	primary	0.0190931	0.807389	0.463976	0.0818323	0.150784
ENSG00000242574.4	HLA-DMB	HLA-DMB	DMB.01_03_01_01	Yes	conditional on the lead primary, conditional 1 and conditional 2 SNP eQTL	0.0190931	0.61006	0.452311	0.177413	0.279461
ENSG00000242574.4	HLA-DMB	HLA-DMB	DMB.01_03_01_01	Yes	conditional on the lead primary SNP eQTL	0.0190931	0.571503	0.434052	0.18795	0.291444
ENSG00000242574.4	HLA-DMB	HLA-DMB	DMB.01_03_01_02	Yes	conditional on the lead primary, conditional 1 and conditional 2 SNP eQTL	0.0894988	0.936984	0.211581	9.48994e-06	7.65607e-05
ENSG00000242574.4	HLA-DMB	HLA-DMB	DMB.01_03_01_02	Yes	primary	0.0894988	0.863615	0.214321	5.58883e-05	0.000308938
ENSG00000242574.4	HLA-DMB	HLA-DMB	DMB.01_03_01_02	Yes	conditional on the lead primary SNP eQTL	0.0894988	0.67762	0.216	0.00170611	0.00592181
ENSG00000242574.4	HLA-DMB	HLA-DMB	DMB.01_03_01_03	Yes	conditional on the lead primary, conditional 1 and conditional 2 SNP eQTL	0.124105	0.555887	0.179393	0.00194369	0.00641095
ENSG00000242574.4	HLA-DMB	HLA-DMB	DMB.01_03_01_03	Yes	primary	0.124105	0.414576	0.1801	0.02134	0.0505366
ENSG00000242574.4	HLA-DMB	HLA-DMB	DMB.01_03_01_03	Yes	conditional on the lead primary SNP eQTL	0.124105	0.26455	0.186715	0.156524	0.253238
ENSG00000204252.8	HLA-DOA	HLA-DOA	DOA.01_01_01	No	primary	0.272076	-0.412001	0.123757	0.000871197	0.003334
ENSG00000204252.8	HLA-DOA	HLA-DOA	DOA.01_01_02_02	Yes	primary	0.433174	-0.103102	0.116671	0.376858	0.503659
ENSG00000204252.8	HLA-DOA	HLA-DOA	DOA.01_01_02_03	Yes	primary	0.0787589	1.64716	0.214218	1.4766e-14	5.87685e-13
ENSG00000204252.8	HLA-DOA	HLA-DOA	DOA.01_01_04_01	No	primary	0.168258	-0.0464999	0.152038	0.759723	0.835276
ENSG00000204252.8	HLA-DOA	HLA-DOA	DOA.01_01_05	No	primary	0.0465394	0.274231	0.246793	0.266493	0.38804
ENSG00000241106.2	HLA-DOB	HLA-DOB	DOB.01_01_01_01	Yes	primary	0.372315	1.21826	0.110081	1.11022e-16	9.60126e-14
ENSG00000241106.2	HLA-DOB	HLA-DOB	DOB.01_01_01_01	Yes	conditional on the lead primary SNP eQTL	0.372315	0.949522	0.115723	2.22045e-16	1.4729e-14
ENSG00000241106.2	HLA-DOB	HLA-DOB	DOB.01_01_01_01	Yes	conditional on the lead primary and conditional 1 SNP eQTL	0.372315	0.826531	0.167436	7.95744e-07	7.4228e-06
ENSG00000241106.2	HLA-DOB	HLA-DOB	DOB.01_01_01_03	Yes	conditional on the lead primary and conditional 1 SNP eQTL	0.0513126	1.2396	0.399005	0.00189179	0.00630949
ENSG00000241106.2	HLA-DOB	HLA-DOB	DOB.01_01_01_03	Yes	conditional on the lead primary SNP eQTL	0.0513126	0.626937	0.25545	0.014118	0.0349728
ENSG00000241106.2	HLA-DOB	HLA-DOB	DOB.01_01_01_03	Yes	primary	0.0513126	0.426426	0.278978	0.126381	0.211343
ENSG00000241106.2	HLA-DOB	HLA-DOB	DOB.01_01_01_04	Yes	primary	0.0871122	-1.32486	0.18402	6.04294e-13	1.63984e-11
ENSG00000241106.2	HLA-DOB	HLA-DOB	DOB.01_01_01_04	Yes	conditional on the lead primary SNP eQTL	0.0871122	-1.09049	0.172459	2.562e-10	4.37004e-09
ENSG00000241106.2	HLA-DOB	HLA-DOB	DOB.01_01_01_04	Yes	conditional on the lead primary and conditional 1 SNP eQTL	0.0871122	-0.629907	0.23011	0.00619235	0.0170581
ENSG00000241106.2	HLA-DOB	HLA-DOB	DOB.01_01_03_02	Yes	conditional on the lead primary and conditional 1 SNP eQTL	0.247017	-0.167968	0.199744	0.400395	0.527136
ENSG00000241106.2	HLA-DOB	HLA-DOB	DOB.01_01_03_02	Yes	conditional on the lead primary SNP eQTL	0.247017	0.0917873	0.135531	0.498252	0.622293
ENSG00000241106.2	HLA-DOB	HLA-DOB	DOB.01_01_03_02	Yes	primary	0.247017	-0.0555806	0.147098	0.705544	0.791747
ENSG00000241106.2	HLA-DOB	HLA-DOB	DOB.01_05	Yes	primary	0.242243	-1.04534	0.141678	1.60316e-13	5.0373e-12
ENSG00000241106.2	HLA-DOB	HLA-DOB	DOB.01_05	Yes	conditional on the lead primary SNP eQTL	0.242243	-0.828353	0.134444	7.21306e-10	1.19617e-08
ENSG00000241106.2	HLA-DOB	HLA-DOB	DOB.01_05	Yes	conditional on the lead primary and conditional 1 SNP eQTL	0.242243	-0.70495	0.189475	0.000198795	0.00094191
ENSG00000231389.3	HLA-DPA1	HLA-DPA1	DPA1.01_03_01_01	Yes	primary	0.140811	0.956623	0.166733	9.61107e-09	1.24735e-07
ENSG00000231389.3	HLA-DPA1	HLA-DPA1	DPA1.01_03_01_02	Yes	primary	0.256563	0.424898	0.142068	0.00278241	0.00883562
ENSG00000231389.3	HLA-DPA1	HLA-DPA1	DPA1.01_03_01_03	Yes	primary	0.103819	-0.643844	0.196008	0.00102061	0.00378448
ENSG00000231389.3	HLA-DPA1	HLA-DPA1	DPA1.01_03_01_04	Yes	primary	0.134845	0.616222	0.179988	0.000617769	0.002414
ENSG00000231389.3	HLA-DPA1	HLA-DPA1	DPA1.01_03_01_05	Yes	primary	0.112172	0.102281	0.212346	0.630039	0.731776
ENSG00000231389.3	HLA-DPA1	HLA-DPA1	DPA1.02_01_01_01	Yes	primary	0.0847255	-1.25504	0.213937	4.45339e-09	6.18296e-08
ENSG00000231389.3	HLA-DPA1	HLA-DPA1	DPA1.02_01_01_02	Yes	primary	0.0536993	-0.954214	0.275244	0.000526694	0.00211031
ENSG00000231389.3	HLA-DPA1	HLA-DPA1	DPA1.02_01_01_03	Yes	primary	0.0155131	-1.00957	0.504379	0.0453273	0.0957455
ENSG00000231389.3	HLA-DPA1	HLA-DPA1	DPA1.02_02_02_01	No	primary	0.0859189	-1.04926	0.246759	2.11725e-05	0.000148706
ENSG00000223865.6	HLA-DPB1	HLA-DPB1	DPB1.01_01_01_01	Yes	conditional on the lead primary SNP eQTL	0.0369928	-1.32381	0.316465	2.87553e-05	0.00018322
ENSG00000223865.6	HLA-DPB1	HLA-DPB1	DPB1.01_01_01_01	Yes	conditional on the lead primary, conditional 1 and conditional 2 SNP eQTL	0.0369928	-1.14258	0.311037	0.000239306	0.00108231
ENSG00000223865.6	HLA-DPB1	HLA-DPB1	DPB1.01_01_01_01	Yes	primary	0.0369928	-0.898345	0.313281	0.00413683	0.0125365
ENSG00000223865.6	HLA-DPB1	HLA-DPB1	DPB1.01_01_01_01	Yes	conditional on the lead primary and conditional 1 SNP eQTL	0.0369928	-0.463587	0.352069	0.187923	0.291444
ENSG00000223865.6	HLA-DPB1	HLA-DPB1	DPB1.01_01_01_02	Yes	conditional on the lead primary SNP eQTL	0.0155131	-0.641325	0.430314	0.136129	0.225747
ENSG00000223865.6	HLA-DPB1	HLA-DPB1	DPB1.01_01_01_02	Yes	conditional on the lead primary, conditional 1 and conditional 2 SNP eQTL	0.0155131	-0.625728	0.470177	0.183244	0.286379
ENSG00000223865.6	HLA-DPB1	HLA-DPB1	DPB1.01_01_01_02	Yes	primary	0.0155131	-0.615504	0.493096	0.211942	0.320327
ENSG00000223865.6	HLA-DPB1	HLA-DPB1	DPB1.01_01_01_02	Yes	conditional on the lead primary and conditional 1 SNP eQTL	0.0155131	-0.183926	0.462211	0.690685	0.783914
ENSG00000223865.6	HLA-DPB1	HLA-DPB1	DPB1.02_01_02_01	Yes	conditional on the lead primary and conditional 1 SNP eQTL	0.0369928	-0.380955	0.264187	0.149306	0.244207
ENSG00000223865.6	HLA-DPB1	HLA-DPB1	DPB1.02_01_02_01	Yes	conditional on the lead primary, conditional 1 and conditional 2 SNP eQTL	0.0369928	-0.331319	0.276341	0.230548	0.344092
ENSG00000223865.6	HLA-DPB1	HLA-DPB1	DPB1.02_01_02_01	Yes	primary	0.0369928	-0.308009	0.287374	0.283808	0.402454
ENSG00000223865.6	HLA-DPB1	HLA-DPB1	DPB1.02_01_02_01	Yes	conditional on the lead primary SNP eQTL	0.0369928	-0.100999	0.266104	0.70428	0.791747
ENSG00000223865.6	HLA-DPB1	HLA-DPB1	DPB1.02_01_02_04	Yes	conditional on the lead primary and conditional 1 SNP eQTL	0.0250597	-1.0616	0.272199	9.61603e-05	0.000503576
ENSG00000223865.6	HLA-DPB1	HLA-DPB1	DPB1.02_01_02_04	Yes	conditional on the lead primary, conditional 1 and conditional 2 SNP eQTL	0.0250597	-0.888185	0.282651	0.00167604	0.00585143
ENSG00000223865.6	HLA-DPB1	HLA-DPB1	DPB1.02_01_02_04	Yes	conditional on the lead primary SNP eQTL	0.0250597	-0.533382	0.280106	0.0568827	0.113575
ENSG00000223865.6	HLA-DPB1	HLA-DPB1	DPB1.02_01_02_04	Yes	primary	0.0250597	-0.362659	0.307924	0.238894	0.354775
ENSG00000223865.6	HLA-DPB1	HLA-DPB1	DPB1.02_01_02_05	Yes	conditional on the lead primary and conditional 1 SNP eQTL	0.0214797	-0.798423	0.309299	0.00984007	0.0262256
ENSG00000223865.6	HLA-DPB1	HLA-DPB1	DPB1.02_01_02_05	Yes	conditional on the lead primary, conditional 1 and conditional 2 SNP eQTL	0.0214797	-0.734526	0.321695	0.0224128	0.0520641
ENSG00000223865.6	HLA-DPB1	HLA-DPB1	DPB1.02_01_02_05	Yes	conditional on the lead primary SNP eQTL	0.0214797	-0.396776	0.337584	0.239859	0.355325
ENSG00000223865.6	HLA-DPB1	HLA-DPB1	DPB1.02_01_02_05	Yes	primary	0.0214797	-0.36468	0.367496	0.321033	0.445713
ENSG00000223865.6	HLA-DPB1	HLA-DPB1	DPB1.03_01_01_01	Yes	primary	0.0787589	-1.57712	0.200041	3.21965e-15	1.60177e-13
ENSG00000223865.6	HLA-DPB1	HLA-DPB1	DPB1.03_01_01_01	Yes	conditional on the lead primary, conditional 1 and conditional 2 SNP eQTL	0.0787589	-0.825506	0.382162	0.0307653	0.0685331
ENSG00000223865.6	HLA-DPB1	HLA-DPB1	DPB1.03_01_01_01	Yes	conditional on the lead primary SNP eQTL	0.0787589	-0.650411	0.385923	0.0919232	0.162041
ENSG00000223865.6	HLA-DPB1	HLA-DPB1	DPB1.03_01_01_01	Yes	conditional on the lead primary and conditional 1 SNP eQTL	0.0787589	-0.519102	0.373868	0.164995	0.264413
ENSG00000223865.6	HLA-DPB1	HLA-DPB1	DPB1.04_01_01_01	Yes	primary	0.227924	0.426278	0.132784	0.0013259	0.00476846
ENSG00000223865.6	HLA-DPB1	HLA-DPB1	DPB1.04_01_01_01	Yes	conditional on the lead primary, conditional 1 and conditional 2 SNP eQTL	0.227924	0.274502	0.13219	0.0378411	0.0809719
ENSG00000223865.6	HLA-DPB1	HLA-DPB1	DPB1.04_01_01_01	Yes	conditional on the lead primary SNP eQTL	0.227924	0.146805	0.123394	0.234154	0.348604
ENSG00000223865.6	HLA-DPB1	HLA-DPB1	DPB1.04_01_01_01	Yes	conditional on the lead primary and conditional 1 SNP eQTL	0.227924	0.129352	0.131504	0.325296	0.450584
ENSG00000223865.6	HLA-DPB1	HLA-DPB1	DPB1.04_01_01_03	Yes	primary	0.0286396	1.4835	0.355706	3.03825e-05	0.000186993
ENSG00000223865.6	HLA-DPB1	HLA-DPB1	DPB1.04_01_01_03	Yes	conditional on the lead primary, conditional 1 and conditional 2 SNP eQTL	0.0286396	1.32955	0.340267	9.33035e-05	0.00049294
ENSG00000223865.6	HLA-DPB1	HLA-DPB1	DPB1.04_01_01_03	Yes	conditional on the lead primary and conditional 1 SNP eQTL	0.0286396	1.22874	0.328366	0.000182567	0.000881531
ENSG00000223865.6	HLA-DPB1	HLA-DPB1	DPB1.04_01_01_03	Yes	conditional on the lead primary SNP eQTL	0.0286396	1.23078	0.341117	0.000308462	0.00135406
ENSG00000223865.6	HLA-DPB1	HLA-DPB1	DPB1.04_01_01_04	Yes	primary	0.0214797	0.581275	0.379204	0.125304	0.210713
ENSG00000223865.6	HLA-DPB1	HLA-DPB1	DPB1.04_01_01_04	Yes	conditional on the lead primary and conditional 1 SNP eQTL	0.0214797	0.231112	0.35905	0.519784	0.643799
ENSG00000223865.6	HLA-DPB1	HLA-DPB1	DPB1.04_01_01_04	Yes	conditional on the lead primary SNP eQTL	0.0214797	0.151899	0.372079	0.683094	0.777339
ENSG00000223865.6	HLA-DPB1	HLA-DPB1	DPB1.04_01_01_04	Yes	conditional on the lead primary, conditional 1 and conditional 2 SNP eQTL	0.0214797	0.0745211	0.369319	0.840089	0.898805
ENSG00000223865.6	HLA-DPB1	HLA-DPB1	DPB1.04_01_01_05	Yes	primary	0.026253	0.531269	0.333357	0.111004	0.189884
ENSG00000223865.6	HLA-DPB1	HLA-DPB1	DPB1.04_01_01_05	Yes	conditional on the lead primary SNP eQTL	0.026253	0.296058	0.301465	0.326068	0.450608
ENSG00000223865.6	HLA-DPB1	HLA-DPB1	DPB1.04_01_01_05	Yes	conditional on the lead primary, conditional 1 and conditional 2 SNP eQTL	0.026253	0.0877972	0.306773	0.774728	0.847093
ENSG00000223865.6	HLA-DPB1	HLA-DPB1	DPB1.04_01_01_05	Yes	conditional on the lead primary and conditional 1 SNP eQTL	0.026253	-0.0366932	0.296465	0.901498	0.932746
ENSG00000223865.6	HLA-DPB1	HLA-DPB1	DPB1.04_01_01_06	Yes	primary	0.0214797	1.55562	0.371633	2.84038e-05	0.00018322
ENSG00000223865.6	HLA-DPB1	HLA-DPB1	DPB1.04_01_01_06	Yes	conditional on the lead primary, conditional 1 and conditional 2 SNP eQTL	0.0214797	1.31818	0.34585	0.000138164	0.000687366
ENSG00000223865.6	HLA-DPB1	HLA-DPB1	DPB1.04_01_01_06	Yes	conditional on the lead primary and conditional 1 SNP eQTL	0.0214797	1.25752	0.33279	0.000157639	0.00077777
ENSG00000223865.6	HLA-DPB1	HLA-DPB1	DPB1.04_01_01_06	Yes	conditional on the lead primary SNP eQTL	0.0214797	0.972956	0.313735	0.00192737	0.00639243
ENSG00000223865.6	HLA-DPB1	HLA-DPB1	DPB1.04_02_01_02	Yes	primary	0.0775656	0.142588	0.221073	0.518939	0.643799
ENSG00000223865.6	HLA-DPB1	HLA-DPB1	DPB1.04_02_01_02	Yes	conditional on the lead primary, conditional 1 and conditional 2 SNP eQTL	0.0775656	0.108973	0.220824	0.62167	0.724877
ENSG00000223865.6	HLA-DPB1	HLA-DPB1	DPB1.04_02_01_02	Yes	conditional on the lead primary and conditional 1 SNP eQTL	0.0775656	-0.0455267	0.213864	0.831423	0.891823
ENSG00000223865.6	HLA-DPB1	HLA-DPB1	DPB1.04_02_01_02	Yes	conditional on the lead primary SNP eQTL	0.0775656	0.00852113	0.207263	0.967206	0.978681
ENSG00000223865.6	HLA-DPB1	HLA-DPB1	DPB1.04_02_01_03	Yes	primary	0.0214797	0.260098	0.453001	0.565855	0.686332
ENSG00000223865.6	HLA-DPB1	HLA-DPB1	DPB1.04_02_01_03	Yes	conditional on the lead primary and conditional 1 SNP eQTL	0.0214797	-0.157875	0.412464	0.701897	0.791747
ENSG00000223865.6	HLA-DPB1	HLA-DPB1	DPB1.04_02_01_03	Yes	conditional on the lead primary, conditional 1 and conditional 2 SNP eQTL	0.0214797	0.0242003	0.42719	0.954824	0.971495
ENSG00000223865.6	HLA-DPB1	HLA-DPB1	DPB1.04_02_01_03	Yes	conditional on the lead primary SNP eQTL	0.0214797	-0.0189129	0.403083	0.962577	0.975651
ENSG00000223865.6	HLA-DPB1	HLA-DPB1	DPB1.05_01_01_01	Yes	conditional on the lead primary, conditional 1 and conditional 2 SNP eQTL	0.0548926	-0.504348	0.236264	0.0327867	0.0716984
ENSG00000223865.6	HLA-DPB1	HLA-DPB1	DPB1.05_01_01_01	Yes	conditional on the lead primary SNP eQTL	0.0548926	-0.400273	0.230403	0.0823388	0.15125
ENSG00000223865.6	HLA-DPB1	HLA-DPB1	DPB1.05_01_01_01	Yes	primary	0.0548926	-0.425214	0.27384	0.120475	0.203175
ENSG00000223865.6	HLA-DPB1	HLA-DPB1	DPB1.05_01_01_01	Yes	conditional on the lead primary and conditional 1 SNP eQTL	0.0548926	-0.119133	0.24387	0.625188	0.727558
ENSG00000223865.6	HLA-DPB1	HLA-DPB1	DPB1.06_01_01_01	Yes	conditional on the lead primary, conditional 1 and conditional 2 SNP eQTL	0.0107399	1.49108	0.492027	0.00244154	0.00787892
ENSG00000223865.6	HLA-DPB1	HLA-DPB1	DPB1.06_01_01_01	Yes	conditional on the lead primary and conditional 1 SNP eQTL	0.0107399	1.19821	0.47766	0.0121245	0.0310658
ENSG00000223865.6	HLA-DPB1	HLA-DPB1	DPB1.06_01_01_01	Yes	conditional on the lead primary SNP eQTL	0.0107399	1.10874	0.506643	0.0286397	0.0645205
ENSG00000223865.6	HLA-DPB1	HLA-DPB1	DPB1.06_01_01_01	Yes	primary	0.0107399	-0.00357438	0.531504	0.994634	0.996303
ENSG00000223865.6	HLA-DPB1	HLA-DPB1	DPB1.09_01_01	Yes	conditional on the lead primary and conditional 1 SNP eQTL	0.0143198	-0.955384	0.434884	0.0280295	0.0638689
ENSG00000223865.6	HLA-DPB1	HLA-DPB1	DPB1.09_01_01	Yes	conditional on the lead primary SNP eQTL	0.0143198	-0.864396	0.442228	0.0506258	0.104219
ENSG00000223865.6	HLA-DPB1	HLA-DPB1	DPB1.09_01_01	Yes	primary	0.0143198	-0.780748	0.51355	0.128437	0.214181
ENSG00000223865.6	HLA-DPB1	HLA-DPB1	DPB1.09_01_01	Yes	conditional on the lead primary, conditional 1 and conditional 2 SNP eQTL	0.0143198	-0.640405	0.44786	0.15274	0.248462
ENSG00000223865.6	HLA-DPB1	HLA-DPB1	DPB1.10_01_01_01	Yes	primary	0.0178998	-0.568733	0.408099	0.163434	0.262992
ENSG00000223865.6	HLA-DPB1	HLA-DPB1	DPB1.10_01_01_01	Yes	conditional on the lead primary and conditional 1 SNP eQTL	0.0178998	-0.177105	0.391583	0.651068	0.750363
ENSG00000223865.6	HLA-DPB1	HLA-DPB1	DPB1.10_01_01_01	Yes	conditional on the lead primary, conditional 1 and conditional 2 SNP eQTL	0.0178998	-0.128506	0.4061	0.75167	0.827946
ENSG00000223865.6	HLA-DPB1	HLA-DPB1	DPB1.10_01_01_01	Yes	conditional on the lead primary SNP eQTL	0.0178998	-0.0709086	0.412611	0.863553	0.911442
ENSG00000223865.6	HLA-DPB1	HLA-DPB1	DPB1.105_01_01_02	Yes	primary	0.0155131	1.11425	0.398253	0.00514454	0.0148371
ENSG00000223865.6	HLA-DPB1	HLA-DPB1	DPB1.105_01_01_02	Yes	conditional on the lead primary SNP eQTL	0.0155131	0.808676	0.414095	0.0508341	0.104288
ENSG00000223865.6	HLA-DPB1	HLA-DPB1	DPB1.105_01_01_02	Yes	conditional on the lead primary, conditional 1 and conditional 2 SNP eQTL	0.0155131	0.690037	0.398858	0.0836243	0.151744
ENSG00000223865.6	HLA-DPB1	HLA-DPB1	DPB1.105_01_01_02	Yes	conditional on the lead primary and conditional 1 SNP eQTL	0.0155131	0.495752	0.386503	0.199612	0.304
ENSG00000223865.6	HLA-DPB1	HLA-DPB1	DPB1.11_01_01	Yes	conditional on the lead primary, conditional 1 and conditional 2 SNP eQTL	0.0190931	-1.02231	0.424221	0.0159588	0.0388875
ENSG00000223865.6	HLA-DPB1	HLA-DPB1	DPB1.11_01_01	Yes	conditional on the lead primary SNP eQTL	0.0190931	-0.832905	0.384611	0.0303436	0.0678469
ENSG00000223865.6	HLA-DPB1	HLA-DPB1	DPB1.11_01_01	Yes	primary	0.0190931	-0.786386	0.409843	0.055016	0.110588
ENSG00000223865.6	HLA-DPB1	HLA-DPB1	DPB1.11_01_01	Yes	conditional on the lead primary and conditional 1 SNP eQTL	0.0190931	-0.266479	0.440945	0.54562	0.668861
ENSG00000223865.6	HLA-DPB1	HLA-DPB1	DPB1.13_01_01_01	Yes	primary	0.0155131	-1.81348	0.528892	0.0006062	0.0023967
ENSG00000223865.6	HLA-DPB1	HLA-DPB1	DPB1.13_01_01_01	Yes	conditional on the lead primary, conditional 1 and conditional 2 SNP eQTL	0.0155131	-1.53711	0.485675	0.00155139	0.00548034
ENSG00000223865.6	HLA-DPB1	HLA-DPB1	DPB1.13_01_01_01	Yes	conditional on the lead primary SNP eQTL	0.0155131	-1.36503	0.491885	0.00551834	0.0156879
ENSG00000223865.6	HLA-DPB1	HLA-DPB1	DPB1.13_01_01_01	Yes	conditional on the lead primary and conditional 1 SNP eQTL	0.0155131	-0.859158	0.495959	0.0832172	0.151465
ENSG00000223865.6	HLA-DPB1	HLA-DPB1	DPB1.14_01_01_01	Yes	conditional on the lead primary SNP eQTL	0.0119332	-0.846459	0.44926	0.0595487	0.116943
ENSG00000223865.6	HLA-DPB1	HLA-DPB1	DPB1.14_01_01_01	Yes	conditional on the lead primary and conditional 1 SNP eQTL	0.0119332	-0.944303	0.51478	0.0665973	0.127582
ENSG00000223865.6	HLA-DPB1	HLA-DPB1	DPB1.14_01_01_01	Yes	conditional on the lead primary, conditional 1 and conditional 2 SNP eQTL	0.0119332	-0.762611	0.537974	0.156319	0.253238
ENSG00000223865.6	HLA-DPB1	HLA-DPB1	DPB1.14_01_01_01	Yes	primary	0.0119332	-0.422521	0.524699	0.420667	0.547142
ENSG00000223865.6	HLA-DPB1	HLA-DPB1	DPB1.17_01_01_01	Yes	conditional on the lead primary and conditional 1 SNP eQTL	0.0143198	0.574177	0.465271	0.217177	0.327411
ENSG00000223865.6	HLA-DPB1	HLA-DPB1	DPB1.17_01_01_01	Yes	conditional on the lead primary SNP eQTL	0.0143198	-0.116617	0.436966	0.789562	0.860089
ENSG00000223865.6	HLA-DPB1	HLA-DPB1	DPB1.17_01_01_01	Yes	primary	0.0143198	0.130976	0.547222	0.810837	0.875352
ENSG00000223865.6	HLA-DPB1	HLA-DPB1	DPB1.17_01_01_01	Yes	conditional on the lead primary, conditional 1 and conditional 2 SNP eQTL	0.0143198	-0.0277616	0.471886	0.953087	0.971495
ENSG00000224557.3	HLA-DPB2	HLA-DPB2	DPB2.01_01_01	Yes	conditional on the lead primary and conditional 1 SNP eQTL	0.125298	-1.12446	0.155761	5.23248e-13	1.48752e-11
ENSG00000224557.3	HLA-DPB2	HLA-DPB2	DPB2.01_01_01	Yes	conditional on the lead primary SNP eQTL	0.125298	-0.931962	0.143758	9.00012e-11	1.85278e-09
ENSG00000224557.3	HLA-DPB2	HLA-DPB2	DPB2.01_01_01	Yes	primary	0.125298	-0.719631	0.172063	2.88487e-05	0.00018322
ENSG00000224557.3	HLA-DPB2	HLA-DPB2	DPB2.01_01_02	Yes	primary	0.220764	-0.914207	0.14457	2.55487e-10	4.37004e-09
ENSG00000224557.3	HLA-DPB2	HLA-DPB2	DPB2.01_01_02	Yes	conditional on the lead primary and conditional 1 SNP eQTL	0.220764	0.897802	0.208433	1.65189e-05	0.00012175
ENSG00000224557.3	HLA-DPB2	HLA-DPB2	DPB2.01_01_02	Yes	conditional on the lead primary SNP eQTL	0.220764	0.892964	0.20759	1.69594e-05	0.000123472
ENSG00000224557.3	HLA-DPB2	HLA-DPB2	DPB2.03_01_01_01	Yes	primary	0.411695	0.472595	0.127678	0.000214364	0.00100768
ENSG00000224557.3	HLA-DPB2	HLA-DPB2	DPB2.03_01_01_01	Yes	conditional on the lead primary and conditional 1 SNP eQTL	0.411695	-0.0514863	0.139788	0.712637	0.798207
ENSG00000224557.3	HLA-DPB2	HLA-DPB2	DPB2.03_01_01_01	Yes	conditional on the lead primary SNP eQTL	0.411695	-0.0358977	0.11954	0.763949	0.838378
ENSG00000224557.3	HLA-DPB2	HLA-DPB2	DPB2.03_01_01_02	Yes	primary	0.169451	0.986661	0.170534	7.22073e-09	9.79721e-08
ENSG00000224557.3	HLA-DPB2	HLA-DPB2	DPB2.03_01_01_02	Yes	conditional on the lead primary and conditional 1 SNP eQTL	0.169451	0.95086	0.178297	9.65995e-08	1.08811e-06
ENSG00000224557.3	HLA-DPB2	HLA-DPB2	DPB2.03_01_01_02	Yes	conditional on the lead primary SNP eQTL	0.169451	0.678579	0.151145	7.1361e-06	6.00036e-05
ENSG00000224557.3	HLA-DPB2	HLA-DPB2	DPB2.03_01_01_03	Yes	primary	0.0727924	0.2377	0.223092	0.286657	0.405532
ENSG00000224557.3	HLA-DPB2	HLA-DPB2	DPB2.03_01_01_03	Yes	conditional on the lead primary and conditional 1 SNP eQTL	0.0727924	-0.183393	0.202074	0.364116	0.491803
ENSG00000224557.3	HLA-DPB2	HLA-DPB2	DPB2.03_01_01_03	Yes	conditional on the lead primary SNP eQTL	0.0727924	-0.169532	0.19323	0.380292	0.506772
ENSG00000196735.7	HLA-DQA1	HLA-DQA1	DQA1.01_01_01_01	Yes	primary	0.097852	0.000782203	0.245595	0.997459	0.997459
ENSG00000196735.7	HLA-DQA1	HLA-DQA1	DQA1.01_01_02	Yes	primary	0.0190931	-0.264872	0.47472	0.576875	0.694344
ENSG00000196735.7	HLA-DQA1	HLA-DQA1	DQA1.01_02_01_01	Yes	primary	0.0775656	1.03593	0.249952	3.40529e-05	0.000203296
ENSG00000196735.7	HLA-DQA1	HLA-DQA1	DQA1.01_02_01_03	Yes	primary	0.022673	0.0768266	0.44789	0.863807	0.911442
ENSG00000196735.7	HLA-DQA1	HLA-DQA1	DQA1.01_02_01_04	Yes	primary	0.0560859	0.89465	0.31461	0.00445955	0.0133118
ENSG00000196735.7	HLA-DQA1	HLA-DQA1	DQA1.01_02_02	Yes	primary	0.0107399	0.861179	0.64201	0.179798	0.282471
ENSG00000196735.7	HLA-DQA1	HLA-DQA1	DQA1.01_03_01_02	Yes	primary	0.075179	2.23114	0.251639	1.11022e-16	9.60126e-14
ENSG00000196735.7	HLA-DQA1	HLA-DQA1	DQA1.01_04_01_02	Yes	primary	0.0238663	0.704394	0.401949	0.0796967	0.147761
ENSG00000196735.7	HLA-DQA1	HLA-DQA1	DQA1.02_01_01_01	Yes	primary	0.134845	-0.757158	0.205349	0.000226752	0.00104132
ENSG00000196735.7	HLA-DQA1	HLA-DQA1	DQA1.03_01_01	Yes	primary	0.0930788	-0.517846	0.220146	0.0186585	0.0445566
ENSG00000196735.7	HLA-DQA1	HLA-DQA1	DQA1.03_02_01_01	Yes	primary	0.0155131	-1.28042	0.675594	0.0580601	0.114774
ENSG00000196735.7	HLA-DQA1	HLA-DQA1	DQA1.03_02_01_02	Yes	primary	0.0119332	-0.15519	1.08422	0.886184	0.924915
ENSG00000196735.7	HLA-DQA1	HLA-DQA1	DQA1.03_03_01_01	Yes	primary	0.0668258	-0.581455	0.278194	0.0366081	0.0786152
ENSG00000196735.7	HLA-DQA1	HLA-DQA1	DQA1.04_01_01_03	Yes	primary	0.0107399	-0.0906311	0.647244	0.888639	0.92586
ENSG00000196735.7	HLA-DQA1	HLA-DQA1	DQA1.05_01_01_01	Yes	primary	0.0155131	-0.923858	0.541097	0.0877516	0.15706
ENSG00000196735.7	HLA-DQA1	HLA-DQA1	DQA1.05_01_01_02	Yes	primary	0.0894988	-0.596199	0.252659	0.01829	0.0440288
ENSG00000196735.7	HLA-DQA1	HLA-DQA1	DQA1.05_05_01_01	Yes	primary	0.0107399	-0.45963	0.543752	0.397947	0.526772
ENSG00000196735.7	HLA-DQA1	HLA-DQA1	DQA1.05_05_01_03	Yes	primary	0.0131265	-1.7716	0.795302	0.0259084	0.0594897
ENSG00000196735.7	HLA-DQA1	HLA-DQA1	DQA1.05_05_01_09	Yes	primary	0.0692124	-0.693709	0.281231	0.013637	0.0342072
ENSG00000179344.12	HLA-DQB1	HLA-DQB1	DQB1.02_01_01	Yes	primary	0.110979	-1.42496	0.192336	1.27565e-13	4.23089e-12
ENSG00000179344.12	HLA-DQB1	HLA-DQB1	DQB1.02_01_01	Yes	conditional on the lead primary SNP eQTL	0.110979	-0.704122	0.225006	0.00175194	0.00600098
ENSG00000179344.12	HLA-DQB1	HLA-DQB1	DQB1.02_02_01_01	Yes	primary	0.0369928	-0.63515	0.349443	0.0691239	0.131006
ENSG00000179344.12	HLA-DQB1	HLA-DQB1	DQB1.02_02_01_01	Yes	conditional on the lead primary SNP eQTL	0.0369928	-0.570385	0.318913	0.0736905	0.138344
ENSG00000179344.12	HLA-DQB1	HLA-DQB1	DQB1.03_01_01_01	Yes	conditional on the lead primary SNP eQTL	0.0668258	-0.95477	0.230675	3.48782e-05	0.000206161
ENSG00000179344.12	HLA-DQB1	HLA-DQB1	DQB1.03_01_01_01	Yes	primary	0.0668258	-0.708127	0.258066	0.00607009	0.0169338
ENSG00000179344.12	HLA-DQB1	HLA-DQB1	DQB1.03_01_01_03	Yes	conditional on the lead primary SNP eQTL	0.0942721	-0.0590908	0.202563	0.770504	0.84402
ENSG00000179344.12	HLA-DQB1	HLA-DQB1	DQB1.03_01_01_03	Yes	primary	0.0942721	0.0181459	0.221825	0.934804	0.958897
ENSG00000179344.12	HLA-DQB1	HLA-DQB1	DQB1.03_02_01_01	Yes	conditional on the lead primary SNP eQTL	0.0906921	-0.884594	0.178418	7.12256e-07	6.97077e-06
ENSG00000179344.12	HLA-DQB1	HLA-DQB1	DQB1.03_02_01_01	Yes	primary	0.0906921	-0.76502	0.197628	0.000108389	0.00055783
ENSG00000179344.12	HLA-DQB1	HLA-DQB1	DQB1.03_02_01_02	Yes	primary	0.0167064	0.26777	0.541968	0.621256	0.724877
ENSG00000179344.12	HLA-DQB1	HLA-DQB1	DQB1.03_02_01_02	Yes	conditional on the lead primary SNP eQTL	0.0167064	0.0257948	0.488657	0.957902	0.972563
ENSG00000179344.12	HLA-DQB1	HLA-DQB1	DQB1.03_03_02_01	Yes	primary	0.0548926	-1.32635	0.29722	8.10057e-06	6.62471e-05
ENSG00000179344.12	HLA-DQB1	HLA-DQB1	DQB1.03_03_02_01	Yes	conditional on the lead primary SNP eQTL	0.0548926	-0.345469	0.304648	0.256797	0.374836
ENSG00000179344.12	HLA-DQB1	HLA-DQB1	DQB1.03_03_02_02	Yes	primary	0.0322196	-1.34452	0.404729	0.000893663	0.00337669
ENSG00000179344.12	HLA-DQB1	HLA-DQB1	DQB1.03_03_02_02	Yes	conditional on the lead primary SNP eQTL	0.0322196	-1.12104	0.367376	0.00227728	0.00738879
ENSG00000179344.12	HLA-DQB1	HLA-DQB1	DQB1.04_02_01_01	Yes	primary	0.0238663	0.306376	0.418781	0.464419	0.589912
ENSG00000179344.12	HLA-DQB1	HLA-DQB1	DQB1.04_02_01_01	Yes	conditional on the lead primary SNP eQTL	0.0238663	-0.0719718	0.387257	0.852562	0.907272
ENSG00000179344.12	HLA-DQB1	HLA-DQB1	DQB1.05_01_01_01	Yes	primary	0.0178998	1.04103	0.483142	0.0311854	0.0692108
ENSG00000179344.12	HLA-DQB1	HLA-DQB1	DQB1.05_01_01_01	Yes	conditional on the lead primary SNP eQTL	0.0178998	0.867386	0.437817	0.0475732	0.098959
ENSG00000179344.12	HLA-DQB1	HLA-DQB1	DQB1.05_01_01_03	Yes	primary	0.106205	1.15419	0.207944	2.84838e-08	3.54267e-07
ENSG00000179344.12	HLA-DQB1	HLA-DQB1	DQB1.05_01_01_03	Yes	conditional on the lead primary SNP eQTL	0.106205	0.852022	0.194051	1.12981e-05	8.87496e-05
ENSG00000179344.12	HLA-DQB1	HLA-DQB1	DQB1.05_02_01_01	Yes	conditional on the lead primary SNP eQTL	0.022673	1.33598	0.398973	0.000812395	0.00312903
ENSG00000179344.12	HLA-DQB1	HLA-DQB1	DQB1.05_02_01_01	Yes	primary	0.022673	1.28209	0.436524	0.00331348	0.0102904
ENSG00000179344.12	HLA-DQB1	HLA-DQB1	DQB1.05_03_01_01	Yes	primary	0.0274463	1.11746	0.339693	0.00100325	0.00374338
ENSG00000179344.12	HLA-DQB1	HLA-DQB1	DQB1.05_03_01_01	Yes	conditional on the lead primary SNP eQTL	0.0274463	0.926076	0.308266	0.00266325	0.00854817
ENSG00000179344.12	HLA-DQB1	HLA-DQB1	DQB1.06_02_01_01	Yes	primary	0.0859189	0.506795	0.221211	0.0219634	0.0514201
ENSG00000179344.12	HLA-DQB1	HLA-DQB1	DQB1.06_02_01_01	Yes	conditional on the lead primary SNP eQTL	0.0859189	0.355273	0.203229	0.0804387	0.148675
ENSG00000179344.12	HLA-DQB1	HLA-DQB1	DQB1.06_03_01_01	Yes	primary	0.0739857	1.31228	0.249355	1.41942e-07	1.54072e-06
ENSG00000179344.12	HLA-DQB1	HLA-DQB1	DQB1.06_03_01_01	Yes	conditional on the lead primary SNP eQTL	0.0739857	0.94152	0.232645	5.18747e-05	0.000292162
ENSG00000179344.12	HLA-DQB1	HLA-DQB1	DQB1.06_04_01	Yes	primary	0.0465394	0.642917	0.300627	0.0324688	0.0715272
ENSG00000179344.12	HLA-DQB1	HLA-DQB1	DQB1.06_04_01	Yes	conditional on the lead primary SNP eQTL	0.0465394	0.426474	0.27453	0.120311	0.203175
ENSG00000204287.9	HLA-DRA	HLA-DRA	DRA.01_01_01_01	Yes	primary	0.143198	0.502633	0.180754	0.00542318	0.0154911
ENSG00000204287.9	HLA-DRA	HLA-DRA	DRA.01_01_01_01	Yes	conditional on the lead primary SNP eQTL	0.143198	0.175867	0.167626	0.294103	0.414102
ENSG00000204287.9	HLA-DRA	HLA-DRA	DRA.01_01_01_02	Yes	conditional on the lead primary SNP eQTL	0.0918854	0.584624	0.199135	0.00332673	0.0102904
ENSG00000204287.9	HLA-DRA	HLA-DRA	DRA.01_01_01_02	Yes	primary	0.0918854	0.265511	0.217823	0.22287	0.334305
ENSG00000204287.9	HLA-DRA	HLA-DRA	DRA.01_01_01_03	Yes	primary	0.297136	-0.913299	0.124436	2.14384e-13	6.39936e-12
ENSG00000204287.9	HLA-DRA	HLA-DRA	DRA.01_01_01_03	Yes	conditional on the lead primary SNP eQTL	0.297136	-0.31959	0.150742	0.0339966	0.0735361
ENSG00000204287.9	HLA-DRA	HLA-DRA	DRA.01_01_02	Yes	conditional on the lead primary SNP eQTL	0.0847255	-0.238285	0.232191	0.304777	0.426117
ENSG00000204287.9	HLA-DRA	HLA-DRA	DRA.01_01_02	Yes	primary	0.0847255	0.115265	0.265406	0.664072	0.759256
ENSG00000204287.9	HLA-DRA	HLA-DRA	DRA.01_02_02	No	conditional on the lead primary SNP eQTL	0.235084	-0.363473	0.141797	0.0103673	0.0273861
ENSG00000204287.9	HLA-DRA	HLA-DRA	DRA.01_02_02	No	primary	0.235084	0.0788502	0.148369	0.595108	0.703524
ENSG00000204287.9	HLA-DRA	HLA-DRA	DRA.01_02_03	Yes	primary	0.146778	0.875654	0.17707	7.60548e-07	7.2071e-06
ENSG00000204287.9	HLA-DRA	HLA-DRA	DRA.01_02_03	Yes	conditional on the lead primary SNP eQTL	0.146778	0.450724	0.167847	0.00724576	0.0194852
ENSG00000196126.6	HLA-DRB1	HLA-DRB1	DRB1.01_01_01	Yes	primary	0.115752	1.28113	0.192692	2.95894e-11	6.30889e-10
ENSG00000196126.6	HLA-DRB1	HLA-DRB1	DRB1.01_02_01	No	primary	0.0238663	0.330875	0.407897	0.417267	0.545918
ENSG00000196126.6	HLA-DRB1	HLA-DRB1	DRB1.03_01_01_01	Yes	primary	0.0990453	0.0209184	0.236574	0.929541	0.955519
ENSG00000196126.6	HLA-DRB1	HLA-DRB1	DRB1.03_01_01_02	Yes	primary	0.0143198	-0.293174	0.561708	0.601717	0.709931
ENSG00000196126.6	HLA-DRB1	HLA-DRB1	DRB1.04_01_01_03	Yes	primary	0.0739857	-1.26031	0.242244	1.96481e-07	2.05788e-06
ENSG00000196126.6	HLA-DRB1	HLA-DRB1	DRB1.04_03_01_01	Yes	primary	0.0119332	-1.9658	0.64182	0.00219242	0.00715232
ENSG00000196126.6	HLA-DRB1	HLA-DRB1	DRB1.04_07_01_01	Yes	primary	0.0107399	-2.16776	0.676982	0.00136434	0.00487731
ENSG00000196126.6	HLA-DRB1	HLA-DRB1	DRB1.07_01_01_01	Yes	primary	0.0811456	-1.29153	0.245018	1.35574e-07	1.49884e-06
ENSG00000196126.6	HLA-DRB1	HLA-DRB1	DRB1.07_01_01_02	Yes	primary	0.0584726	-1.60915	0.29274	3.86666e-08	4.71102e-07
ENSG00000196126.6	HLA-DRB1	HLA-DRB1	DRB1.08_02_01_01	Yes	primary	0.0202864	-0.327369	0.35677	0.358833	0.485767
ENSG00000196126.6	HLA-DRB1	HLA-DRB1	DRB1.09_01_02_01	Yes	primary	0.0346062	-0.315988	0.418018	0.449698	0.577354
ENSG00000196126.6	HLA-DRB1	HLA-DRB1	DRB1.11_01_01_01	Yes	primary	0.0393795	0.107476	0.383458	0.779262	0.850492
ENSG00000196126.6	HLA-DRB1	HLA-DRB1	DRB1.11_01_01_03	Yes	primary	0.0286396	0.198626	0.458911	0.665144	0.759256
ENSG00000196126.6	HLA-DRB1	HLA-DRB1	DRB1.11_04_01	Yes	primary	0.0298329	-0.509292	0.407446	0.211314	0.320188
ENSG00000196126.6	HLA-DRB1	HLA-DRB1	DRB1.12_02_01_03	Yes	primary	0.0107399	-0.385199	0.574004	0.502173	0.625882
ENSG00000196126.6	HLA-DRB1	HLA-DRB1	DRB1.13_01_01_01	Yes	primary	0.0501193	0.945193	0.367765	0.0101668	0.0269759
ENSG00000196126.6	HLA-DRB1	HLA-DRB1	DRB1.13_01_01_02	Yes	primary	0.0286396	0.670285	0.437672	0.125651	0.210713
ENSG00000196126.6	HLA-DRB1	HLA-DRB1	DRB1.13_02_01_02	Yes	primary	0.052506	0.646903	0.324783	0.0463926	0.0975224
ENSG00000196126.6	HLA-DRB1	HLA-DRB1	DRB1.15_01_01_02	Yes	primary	0.0632458	2.51632	0.253737	1.11022e-16	9.60126e-14
ENSG00000196126.6	HLA-DRB1	HLA-DRB1	DRB1.15_01_01_05	Yes	primary	0.0119332	2.36148	0.579992	4.66956e-05	0.000265498
ENSG00000204592.5	HLA-E	HLA-E	E.01_01_01_01	Yes	primary	0.498807	-0.662248	0.0948334	2.88369e-12	7.17319e-11
ENSG00000204592.5	HLA-E	HLA-E	E.01_01_01_01	Yes	conditional on the lead primary SNP eQTL	0.498807	-0.574409	0.19528	0.0032666	0.0102103
ENSG00000204592.5	HLA-E	HLA-E	E.01_01_01_01	Yes	conditional on the lead primary and conditional 1 SNP eQTL	0.498807	-0.533988	0.197157	0.00676014	0.0184283
ENSG00000204592.5	HLA-E	HLA-E	E.01_01_01_02	Yes	conditional on the lead primary SNP eQTL	0.0274463	1.52671	0.4175	0.000255384	0.00113085
ENSG00000204592.5	HLA-E	HLA-E	E.01_01_01_02	Yes	primary	0.0274463	1.54845	0.43945	0.000425704	0.0017649
ENSG00000204592.5	HLA-E	HLA-E	E.01_01_01_02	Yes	conditional on the lead primary and conditional 1 SNP eQTL	0.0274463	1.47198	0.418995	0.000442864	0.00182338
ENSG00000204592.5	HLA-E	HLA-E	E.01_01_01_03	Yes	conditional on the lead primary SNP eQTL	0.0334129	0.847546	0.239779	0.000408236	0.00173805
ENSG00000204592.5	HLA-E	HLA-E	E.01_01_01_03	Yes	conditional on the lead primary and conditional 1 SNP eQTL	0.0334129	0.812992	0.240007	0.00070567	0.00273562
ENSG00000204592.5	HLA-E	HLA-E	E.01_01_01_03	Yes	primary	0.0334129	0.717232	0.248841	0.00394804	0.0120871
ENSG00000204592.5	HLA-E	HLA-E	E.01_03_01_01	Yes	primary	0.097852	0.312955	0.177143	0.0772819	0.144179
ENSG00000204592.5	HLA-E	HLA-E	E.01_03_01_01	Yes	conditional on the lead primary and conditional 1 SNP eQTL	0.097852	0.176194	0.189428	0.352299	0.479095
ENSG00000204592.5	HLA-E	HLA-E	E.01_03_01_01	Yes	conditional on the lead primary SNP eQTL	0.097852	0.0296638	0.175721	0.865945	0.911442
ENSG00000204592.5	HLA-E	HLA-E	E.01_03_02_01	Yes	conditional on the lead primary and conditional 1 SNP eQTL	0.289976	-0.623692	0.160965	0.00010675	0.000554172
ENSG00000204592.5	HLA-E	HLA-E	E.01_03_02_01	Yes	conditional on the lead primary SNP eQTL	0.289976	-0.424821	0.149904	0.00459751	0.0135877
ENSG00000204592.5	HLA-E	HLA-E	E.01_03_02_01	Yes	primary	0.289976	0.271168	0.110199	0.013866	0.0346361
ENSG00000204592.5	HLA-E	HLA-E	E.01_03_02_02	Yes	primary	0.0167064	0.50859	0.369355	0.168521	0.268286
ENSG00000204592.5	HLA-E	HLA-E	E.01_03_02_02	Yes	conditional on the lead primary SNP eQTL	0.0167064	0.123575	0.357598	0.729667	0.811194
ENSG00000204592.5	HLA-E	HLA-E	E.01_03_02_02	Yes	conditional on the lead primary and conditional 1 SNP eQTL	0.0167064	0.0473214	0.359899	0.895392	0.92965
ENSG00000204592.5	HLA-E	HLA-E	E.01_06	Yes	primary	0.022673	1.33403	0.400954	0.000877452	0.00333655
ENSG00000204592.5	HLA-E	HLA-E	E.01_06	Yes	conditional on the lead primary and conditional 1 SNP eQTL	0.022673	1.17908	0.410371	0.00406321	0.0123762
ENSG00000204592.5	HLA-E	HLA-E	E.01_06	Yes	conditional on the lead primary SNP eQTL	0.022673	0.863313	0.394102	0.0284819	0.0645205
ENSG00000204642.9	HLA-F	HLA-F	F.01_01_01_01	Yes	primary	0.250597	-0.244664	0.133675	0.0672073	0.128188
ENSG00000204642.9	HLA-F	HLA-F	F.01_01_01_01	Yes	conditional on the lead primary SNP eQTL	0.250597	-0.147169	0.127187	0.247228	0.364432
ENSG00000204642.9	HLA-F	HLA-F	F.01_01_01_01	Yes	conditional on the lead primary and conditional 1 SNP eQTL	0.250597	-0.0746885	0.146017	0.608998	0.714607
ENSG00000204642.9	HLA-F	HLA-F	F.01_01_01_01	Yes	conditional on the lead primary, conditional 1 and conditional 2 SNP eQTL	0.250597	-0.022855	0.142828	0.872867	0.91582
ENSG00000204642.9	HLA-F	HLA-F	F.01_01_01_05	Yes	conditional on the lead primary, conditional 1 and conditional 2 SNP eQTL	0.0190931	0.467634	0.453523	0.302487	0.423907
ENSG00000204642.9	HLA-F	HLA-F	F.01_01_01_05	Yes	conditional on the lead primary SNP eQTL	0.0190931	0.296197	0.450609	0.510971	0.63552
ENSG00000204642.9	HLA-F	HLA-F	F.01_01_01_05	Yes	conditional on the lead primary and conditional 1 SNP eQTL	0.0190931	0.188934	0.463562	0.68359	0.777339
ENSG00000204642.9	HLA-F	HLA-F	F.01_01_01_05	Yes	primary	0.0190931	0.110559	0.476778	0.816626	0.878424
ENSG00000204642.9	HLA-F	HLA-F	F.01_01_01_08	Yes	primary	0.151551	-0.611914	0.146656	3.01333e-05	0.000186993
ENSG00000204642.9	HLA-F	HLA-F	F.01_01_01_08	Yes	conditional on the lead primary SNP eQTL	0.151551	-0.488983	0.140577	0.000504442	0.00203481
ENSG00000204642.9	HLA-F	HLA-F	F.01_01_01_08	Yes	conditional on the lead primary, conditional 1 and conditional 2 SNP eQTL	0.151551	-0.433449	0.155559	0.00532967	0.0152972
ENSG00000204642.9	HLA-F	HLA-F	F.01_01_01_08	Yes	conditional on the lead primary and conditional 1 SNP eQTL	0.151551	-0.314293	0.170402	0.0651225	0.126228
ENSG00000204642.9	HLA-F	HLA-F	F.01_01_01_09	Yes	conditional on the lead primary, conditional 1 and conditional 2 SNP eQTL	0.28043	-0.252501	0.175087	0.14926	0.244207
ENSG00000204642.9	HLA-F	HLA-F	F.01_01_01_09	Yes	conditional on the lead primary and conditional 1 SNP eQTL	0.28043	-0.192404	0.175178	0.272058	0.392316
ENSG00000204642.9	HLA-F	HLA-F	F.01_01_01_09	Yes	primary	0.28043	-0.14984	0.143778	0.297338	0.417673
ENSG00000204642.9	HLA-F	HLA-F	F.01_01_01_09	Yes	conditional on the lead primary SNP eQTL	0.28043	0.0322759	0.137759	0.814758	0.877997
ENSG00000204642.9	HLA-F	HLA-F	F.01_01_01_11	Yes	conditional on the lead primary, conditional 1 and conditional 2 SNP eQTL	0.0119332	0.82594	0.484328	0.0881325	0.15706
ENSG00000204642.9	HLA-F	HLA-F	F.01_01_01_11	Yes	conditional on the lead primary SNP eQTL	0.0119332	0.715445	0.488516	0.14305	0.235913
ENSG00000204642.9	HLA-F	HLA-F	F.01_01_01_11	Yes	conditional on the lead primary and conditional 1 SNP eQTL	0.0119332	0.581049	0.507614	0.252347	0.370151
ENSG00000204642.9	HLA-F	HLA-F	F.01_01_01_11	Yes	primary	0.0119332	0.5625	0.519671	0.279067	0.397621
ENSG00000204642.9	HLA-F	HLA-F	F.01_01_02_04	Yes	primary	0.0560859	1.24292	0.253063	9.03736e-07	8.1747e-06
ENSG00000204642.9	HLA-F	HLA-F	F.01_01_02_04	Yes	conditional on the lead primary, conditional 1 and conditional 2 SNP eQTL	0.0560859	0.366548	0.302279	0.225276	0.337067
ENSG00000204642.9	HLA-F	HLA-F	F.01_01_02_04	Yes	conditional on the lead primary SNP eQTL	0.0560859	0.335368	0.305108	0.271692	0.392316
ENSG00000204642.9	HLA-F	HLA-F	F.01_01_02_04	Yes	conditional on the lead primary and conditional 1 SNP eQTL	0.0560859	0.283657	0.299559	0.343682	0.469674
ENSG00000204642.9	HLA-F	HLA-F	F.01_01_02_06	Yes	primary	0.0167064	2.53624	0.428493	3.23977e-09	4.71742e-08
ENSG00000204642.9	HLA-F	HLA-F	F.01_01_02_06	Yes	conditional on the lead primary SNP eQTL	0.0167064	1.82938	0.43176	2.26491e-05	0.00015542
ENSG00000204642.9	HLA-F	HLA-F	F.01_01_02_06	Yes	conditional on the lead primary, conditional 1 and conditional 2 SNP eQTL	0.0167064	1.78918	0.430041	3.17552e-05	0.000193448
ENSG00000204642.9	HLA-F	HLA-F	F.01_01_02_06	Yes	conditional on the lead primary and conditional 1 SNP eQTL	0.0167064	1.33239	0.470464	0.00462462	0.0136005
ENSG00000204642.9	HLA-F	HLA-F	F.01_01_02_07	Yes	primary	0.0369928	1.83739	0.324036	1.4253e-08	1.81044e-07
ENSG00000204642.9	HLA-F	HLA-F	F.01_01_02_07	Yes	conditional on the lead primary and conditional 1 SNP eQTL	0.0369928	1.25532	0.384254	0.00108729	0.00398228
ENSG00000204642.9	HLA-F	HLA-F	F.01_01_02_07	Yes	conditional on the lead primary SNP eQTL	0.0369928	1.01116	0.356297	0.00453996	0.0134844
ENSG00000204642.9	HLA-F	HLA-F	F.01_01_02_07	Yes	conditional on the lead primary, conditional 1 and conditional 2 SNP eQTL	0.0369928	0.994096	0.353637	0.00493779	0.01431
ENSG00000204642.9	HLA-F	HLA-F	F.01_03_01_01	Yes	conditional on the lead primary SNP eQTL	0.150358	0.266179	0.161562	0.0994495	0.173601
ENSG00000204642.9	HLA-F	HLA-F	F.01_03_01_01	Yes	conditional on the lead primary, conditional 1 and conditional 2 SNP eQTL	0.150358	0.114607	0.186296	0.538433	0.661408
ENSG00000204642.9	HLA-F	HLA-F	F.01_03_01_01	Yes	conditional on the lead primary and conditional 1 SNP eQTL	0.150358	0.102747	0.186075	0.580826	0.695298
ENSG00000204642.9	HLA-F	HLA-F	F.01_03_01_01	Yes	primary	0.150358	0.0668034	0.169653	0.693754	0.784415
ENSG00000204632.7	HLA-G	HLA-G	G.01_01_01_01	Yes	primary	0.121718	0.82619	0.19057	1.45526e-05	0.000109974
ENSG00000204632.7	HLA-G	HLA-G	G.01_01_01_02	Yes	primary	0.137232	0.75168	0.176449	2.04387e-05	0.000145261
ENSG00000204632.7	HLA-G	HLA-G	G.01_01_01_04	Yes	primary	0.0322196	0.865275	0.346165	0.0124332	0.0315856
ENSG00000204632.7	HLA-G	HLA-G	G.01_01_01_05	Yes	primary	0.114558	1.05715	0.193328	4.54726e-08	5.32297e-07
ENSG00000204632.7	HLA-G	HLA-G	G.01_01_02_01	Yes	primary	0.204057	-1.11216	0.155181	7.67386e-13	1.99187e-11
ENSG00000204632.7	HLA-G	HLA-G	G.01_01_03_03	Yes	primary	0.0954654	-0.817871	0.219696	0.00019707	0.000941204
ENSG00000204632.7	HLA-G	HLA-G	G.01_01_22	Yes	primary	0.026253	-0.73036	0.38393	0.0571286	0.113683
ENSG00000204632.7	HLA-G	HLA-G	G.01_03_01_02	Yes	primary	0.0357995	-0.459563	0.34947	0.1885	0.29154
ENSG00000204632.7	HLA-G	HLA-G	G.01_04_01	Yes	primary	0.115752	0.157784	0.19516	0.418811	0.545918
ENSG00000204632.7	HLA-G	HLA-G	G.01_04_04	Yes	primary	0.0178998	-0.519029	0.474984	0.274513	0.393007
ENSG00000204632.7	HLA-G	HLA-G	G.01_05N	Yes	primary	0.0119332	-0.364541	0.713229	0.609271	0.714607
ENSG00000204632.7	HLA-G	HLA-G	G.01_06	Yes	primary	0.0596659	-1.03674	0.25336	4.27738e-05	0.000247922
ENSG00000206341.6	HLA-H	HLA-H	H.01_01_01_01	No	primary	0.321002	-0.0641227	0.139277	0.645231	0.746517
ENSG00000206341.6	HLA-H	HLA-H	H.01_01_01_01	No	conditional on the lead primary and conditional 1 SNP eQTL	0.321002	-0.0419363	0.115576	0.71672	0.801276
ENSG00000206341.6	HLA-H	HLA-H	H.01_01_01_01	No	conditional on the lead primary SNP eQTL	0.321002	-0.0365193	0.115162	0.751158	0.827946
ENSG00000206341.6	HLA-H	HLA-H	H.01_01_01_01	No	conditional on the lead primary, conditional 1 and conditional 2 SNP eQTL	0.321002	-0.027367	0.138879	0.843783	0.901143
ENSG00000206341.6	HLA-H	HLA-H	H.01_02	Yes	conditional on the lead primary, conditional 1 and conditional 2 SNP eQTL	0.0513126	-0.647441	0.282921	0.0221134	0.0515692
ENSG00000206341.6	HLA-H	HLA-H	H.01_02	Yes	primary	0.0513126	-0.61408	0.285232	0.0313257	0.0692647
ENSG00000206341.6	HLA-H	HLA-H	H.01_02	Yes	conditional on the lead primary SNP eQTL	0.0513126	-0.460993	0.238164	0.0529155	0.107818
ENSG00000206341.6	HLA-H	HLA-H	H.01_02	Yes	conditional on the lead primary and conditional 1 SNP eQTL	0.0513126	-0.460499	0.238337	0.0533432	0.108319
ENSG00000206341.6	HLA-H	HLA-H	H.02_01_01_01	Yes	primary	0.22673	-0.628035	0.180294	0.000495105	0.00201073
ENSG00000206341.6	HLA-H	HLA-H	H.02_01_01_01	Yes	conditional on the lead primary, conditional 1 and conditional 2 SNP eQTL	0.22673	-0.565497	0.180863	0.00176806	0.00600098
ENSG00000206341.6	HLA-H	HLA-H	H.02_01_01_01	Yes	conditional on the lead primary SNP eQTL	0.22673	-0.372764	0.150982	0.0135515	0.0341361
ENSG00000206341.6	HLA-H	HLA-H	H.02_01_01_01	Yes	conditional on the lead primary and conditional 1 SNP eQTL	0.22673	-0.367648	0.15175	0.0154047	0.0378392
ENSG00000206341.6	HLA-H	HLA-H	H.02_02	Yes	primary	0.0322196	-1.05516	0.38526	0.0061657	0.0170581
ENSG00000206341.6	HLA-H	HLA-H	H.02_02	Yes	conditional on the lead primary, conditional 1 and conditional 2 SNP eQTL	0.0322196	-0.972788	0.383805	0.0112579	0.0292217
ENSG00000206341.6	HLA-H	HLA-H	H.02_02	Yes	conditional on the lead primary SNP eQTL	0.0322196	-0.764819	0.320973	0.0171808	0.0416949
ENSG00000206341.6	HLA-H	HLA-H	H.02_02	Yes	conditional on the lead primary and conditional 1 SNP eQTL	0.0322196	-0.760646	0.321316	0.0179192	0.0433107
ENSG00000206341.6	HLA-H	HLA-H	H.02_03	Yes	conditional on the lead primary, conditional 1 and conditional 2 SNP eQTL	0.0393795	-1.70887	0.380943	7.26127e-06	6.0208e-05
ENSG00000206341.6	HLA-H	HLA-H	H.02_03	Yes	primary	0.0393795	-1.68317	0.384016	1.17017e-05	9.07262e-05
ENSG00000206341.6	HLA-H	HLA-H	H.02_03	Yes	conditional on the lead primary SNP eQTL	0.0393795	-1.34158	0.316396	2.23322e-05	0.000155027
ENSG00000206341.6	HLA-H	HLA-H	H.02_03	Yes	conditional on the lead primary and conditional 1 SNP eQTL	0.0393795	-1.33428	0.317884	2.70036e-05	0.000177155
ENSG00000206341.6	HLA-H	HLA-H	H.02_04	Yes	conditional on the lead primary SNP eQTL	0.25895	0.37885	0.136916	0.00565691	0.0160056
ENSG00000206341.6	HLA-H	HLA-H	H.02_04	Yes	conditional on the lead primary and conditional 1 SNP eQTL	0.25895	0.375609	0.137234	0.00620034	0.0170581
ENSG00000206341.6	HLA-H	HLA-H	H.02_04	Yes	primary	0.25895	0.176288	0.163994	0.282388	0.401394
ENSG00000206341.6	HLA-H	HLA-H	H.02_04	Yes	conditional on the lead primary, conditional 1 and conditional 2 SNP eQTL	0.25895	0.129867	0.163692	0.427568	0.552507
ENSG00000230795.2	HLA-K	HLA-K	K.01_01_01_01	Yes	conditional on the lead primary and conditional 1 SNP eQTL	0.159905	1.17185	0.203098	7.93299e-09	1.05244e-07
ENSG00000230795.2	HLA-K	HLA-K	K.01_01_01_01	Yes	conditional on the lead primary SNP eQTL	0.159905	0.598946	0.145053	3.64116e-05	0.000213115
ENSG00000230795.2	HLA-K	HLA-K	K.01_01_01_01	Yes	primary	0.159905	0.615925	0.16101	0.000130573	0.000664154
ENSG00000230795.2	HLA-K	HLA-K	K.01_01_01_02	Yes	conditional on the lead primary and conditional 1 SNP eQTL	0.201671	-0.190767	0.189435	0.313918	0.436851
ENSG00000230795.2	HLA-K	HLA-K	K.01_01_01_02	Yes	primary	0.201671	0.146085	0.159032	0.358311	0.485767
ENSG00000230795.2	HLA-K	HLA-K	K.01_01_01_02	Yes	conditional on the lead primary SNP eQTL	0.201671	0.0306554	0.144568	0.832069	0.891823
ENSG00000230795.2	HLA-K	HLA-K	K.01_01_01_03	No	conditional on the lead primary SNP eQTL	0.0656325	0.267742	0.185557	0.149047	0.244207
ENSG00000230795.2	HLA-K	HLA-K	K.01_01_01_03	No	primary	0.0656325	0.223093	0.201122	0.267326	0.388306
ENSG00000230795.2	HLA-K	HLA-K	K.01_01_01_03	No	conditional on the lead primary and conditional 1 SNP eQTL	0.0656325	0.167839	0.224367	0.454426	0.580926
ENSG00000230795.2	HLA-K	HLA-K	K.01_01_01_04	Yes	primary	0.0453461	0.454266	0.280051	0.104785	0.182381
ENSG00000230795.2	HLA-K	HLA-K	K.01_01_01_04	Yes	conditional on the lead primary SNP eQTL	0.0453461	0.227458	0.255038	0.372468	0.500819
ENSG00000230795.2	HLA-K	HLA-K	K.01_01_01_04	Yes	conditional on the lead primary and conditional 1 SNP eQTL	0.0453461	0.254523	0.33797	0.451394	0.578288
ENSG00000230795.2	HLA-K	HLA-K	K.01_02	No	conditional on the lead primary and conditional 1 SNP eQTL	0.383055	-0.737253	0.125561	4.31465e-09	6.13297e-08
ENSG00000230795.2	HLA-K	HLA-K	K.01_02	No	conditional on the lead primary SNP eQTL	0.383055	-0.419373	0.105484	7.01716e-05	0.000380841
ENSG00000230795.2	HLA-K	HLA-K	K.01_02	No	primary	0.383055	-0.331802	0.117303	0.00467556	0.0136829
ENSG00000230795.2	HLA-K	HLA-K	K.01_03	Yes	conditional on the lead primary and conditional 1 SNP eQTL	0.0680191	1.87399	0.240868	7.21645e-15	3.0773e-13
ENSG00000230795.2	HLA-K	HLA-K	K.01_03	Yes	primary	0.0680191	1.56438	0.242663	1.1429e-10	2.20101e-09
ENSG00000230795.2	HLA-K	HLA-K	K.01_03	Yes	conditional on the lead primary SNP eQTL	0.0680191	1.35468	0.222655	1.17052e-09	1.83895e-08
ENSG00000243753.1	HLA-L	HLA-L	L.01_01_01_01	Yes	primary	0.403341	0.474635	0.124259	0.000133596	0.000670224
ENSG00000243753.1	HLA-L	HLA-L	L.01_01_01_01	Yes	conditional on the lead primary, conditional 1 and conditional 2 SNP eQTL	0.403341	0.359464	0.124286	0.00382519	0.0117713
ENSG00000243753.1	HLA-L	HLA-L	L.01_01_01_01	Yes	conditional on the lead primary SNP eQTL	0.403341	0.100484	0.139553	0.471499	0.597632
ENSG00000243753.1	HLA-L	HLA-L	L.01_01_01_02	Yes	primary	0.0560859	0.184815	0.250803	0.461186	0.587054
ENSG00000243753.1	HLA-L	HLA-L	L.01_01_01_02	Yes	conditional on the lead primary, conditional 1 and conditional 2 SNP eQTL	0.0560859	0.0369852	0.242624	0.878841	0.92047
ENSG00000243753.1	HLA-L	HLA-L	L.01_01_01_02	Yes	conditional on the lead primary SNP eQTL	0.0560859	-0.0163298	0.238012	0.945301	0.966343
ENSG00000243753.1	HLA-L	HLA-L	L.01_01_01_03	Yes	primary	0.075179	0.311661	0.240482	0.194979	0.299236
ENSG00000243753.1	HLA-L	HLA-L	L.01_01_01_03	Yes	conditional on the lead primary, conditional 1 and conditional 2 SNP eQTL	0.075179	0.220144	0.231133	0.340865	0.467808
ENSG00000243753.1	HLA-L	HLA-L	L.01_01_01_03	Yes	conditional on the lead primary SNP eQTL	0.075179	0.124443	0.227704	0.584712	0.696576
ENSG00000243753.1	HLA-L	HLA-L	L.01_01_02	Yes	conditional on the lead primary SNP eQTL	0.168258	-0.232083	0.177128	0.19011	0.293045
ENSG00000243753.1	HLA-L	HLA-L	L.01_01_02	Yes	primary	0.168258	0.142786	0.178466	0.423669	0.549542
ENSG00000243753.1	HLA-L	HLA-L	L.01_01_02	Yes	conditional on the lead primary, conditional 1 and conditional 2 SNP eQTL	0.168258	-0.045501	0.177369	0.79754	0.864628
ENSG00000243753.1	HLA-L	HLA-L	L.01_02	Yes	primary	0.297136	-0.871874	0.136501	1.68834e-10	3.1498e-09
ENSG00000243753.1	HLA-L	HLA-L	L.01_02	Yes	conditional on the lead primary, conditional 1 and conditional 2 SNP eQTL	0.297136	-0.757474	0.166487	5.37077e-06	4.64688e-05
ENSG00000243753.1	HLA-L	HLA-L	L.01_02	Yes	conditional on the lead primary SNP eQTL	0.297136	0.0102924	0.495807	0.983438	0.988405
ENSG00000204520.8	MICA	MICA	MICA.001	Yes	conditional on the lead primary and conditional 1 SNP eQTL	0.357995	-1.14133	0.115061	1.11022e-16	9.60126e-14
ENSG00000204520.8	MICA	MICA	MICA.001	Yes	primary	0.357995	-1.25464	0.103239	1.11022e-16	9.60126e-14
ENSG00000204520.8	MICA	MICA	MICA.001	Yes	conditional on the lead primary, conditional 1 and conditional 2 SNP eQTL	0.357995	-1.20659	0.105745	1.11022e-16	9.60126e-14
ENSG00000204520.8	MICA	MICA	MICA.001	Yes	conditional on the lead primary SNP eQTL	0.357995	-1.00064	0.12453	8.88178e-16	4.82039e-14
ENSG00000204520.8	MICA	MICA	MICA.004	Yes	conditional on the lead primary SNP eQTL	0.130072	0.389849	0.16958	0.0215101	0.0505573
ENSG00000204520.8	MICA	MICA	MICA.004	Yes	primary	0.130072	0.313114	0.169068	0.0640251	0.124505
ENSG00000204520.8	MICA	MICA	MICA.004	Yes	conditional on the lead primary, conditional 1 and conditional 2 SNP eQTL	0.130072	0.218924	0.167215	0.190455	0.293045
ENSG00000204520.8	MICA	MICA	MICA.004	Yes	conditional on the lead primary and conditional 1 SNP eQTL	0.130072	0.103631	0.163842	0.527055	0.650106
ENSG00000204520.8	MICA	MICA	MICA.008_01_01	Yes	primary	0.108592	0.894941	0.20286	1.02605e-05	8.16736e-05
ENSG00000204520.8	MICA	MICA	MICA.008_01_01	Yes	conditional on the lead primary, conditional 1 and conditional 2 SNP eQTL	0.108592	0.732614	0.207117	0.000404382	0.00173681
ENSG00000204520.8	MICA	MICA	MICA.008_01_01	Yes	conditional on the lead primary and conditional 1 SNP eQTL	0.108592	0.566177	0.205542	0.00587709	0.0164724
ENSG00000204520.8	MICA	MICA	MICA.008_01_01	Yes	conditional on the lead primary SNP eQTL	0.108592	0.178588	0.201852	0.376293	0.503659
ENSG00000204520.8	MICA	MICA	MICA.008_01_02	Yes	conditional on the lead primary SNP eQTL	0.229117	0.541336	0.132576	4.44159e-05	0.000254964
ENSG00000204520.8	MICA	MICA	MICA.008_01_02	Yes	conditional on the lead primary, conditional 1 and conditional 2 SNP eQTL	0.229117	0.537237	0.136869	8.66639e-05	0.000461949
ENSG00000204520.8	MICA	MICA	MICA.008_01_02	Yes	primary	0.229117	0.480178	0.140027	0.000605401	0.0023967
ENSG00000204520.8	MICA	MICA	MICA.008_01_02	Yes	conditional on the lead primary and conditional 1 SNP eQTL	0.229117	0.438775	0.135223	0.00117527	0.00427826
ENSG00000204520.8	MICA	MICA	MICA.008_04	Yes	primary	0.173031	0.80886	0.156398	2.31851e-07	2.38647e-06
ENSG00000204520.8	MICA	MICA	MICA.008_04	Yes	conditional on the lead primary, conditional 1 and conditional 2 SNP eQTL	0.173031	0.757552	0.154017	8.71526e-07	8.00463e-06
ENSG00000204520.8	MICA	MICA	MICA.008_04	Yes	conditional on the lead primary and conditional 1 SNP eQTL	0.173031	0.683715	0.150922	5.89138e-06	5.0245e-05
ENSG00000204520.8	MICA	MICA	MICA.008_04	Yes	conditional on the lead primary SNP eQTL	0.173031	0.220619	0.165486	0.182479	0.285932
ENSG00000204516.5	MICB	MICB	MICB.002_01_01	Yes	primary	0.170644	0.288626	0.149812	0.0540302	0.10926
ENSG00000204516.5	MICB	MICB	MICB.002_01_02	Yes	primary	0.0107399	0.736228	0.491504	0.134157	0.223097
ENSG00000204516.5	MICB	MICB	MICB.003	Yes	primary	0.052506	-0.222044	0.254698	0.38332	0.509671
ENSG00000204516.5	MICB	MICB	MICB.004_01_01	Yes	primary	0.206444	-1.12316	0.107058	1.11022e-16	9.60126e-14
ENSG00000204516.5	MICB	MICB	MICB.005_02_01	Yes	primary	0.182578	-0.0962713	0.140433	0.493007	0.61781
ENSG00000204516.5	MICB	MICB	MICB.005_02_02	Yes	primary	0.108592	0.850894	0.162326	1.58956e-07	1.69459e-06
ENSG00000204516.5	MICB	MICB	MICB.005_02_04	Yes	primary	0.147971	0.785444	0.156259	4.99363e-07	4.96866e-06
ENSG00000204516.5	MICB	MICB	MICB.008	Yes	primary	0.118138	0.222978	0.174474	0.201247	0.305712
ENSG00000168394.9	TAP1	TAP1	TAP1.01_01_01_01	No	primary	0.375895	-0.723724	0.108211	2.2608e-11	4.99889e-10
ENSG00000168394.9	TAP1	TAP1	TAP1.01_01_01_01	No	conditional on the lead primary SNP eQTL	0.375895	-0.0394922	0.208336	0.849653	0.905791
ENSG00000168394.9	TAP1	TAP1	TAP1.01_01_01_01	No	conditional on the lead primary and conditional 1 SNP eQTL	0.375895	0.03676	0.219099	0.866758	0.911442
ENSG00000168394.9	TAP1	TAP1	TAP1.01_01_01_02	Yes	conditional on the lead primary and conditional 1 SNP eQTL	0.218377	-0.553941	0.155191	0.000357791	0.00155913
ENSG00000168394.9	TAP1	TAP1	TAP1.01_01_01_02	Yes	conditional on the lead primary SNP eQTL	0.218377	-0.370066	0.149531	0.0133292	0.0337185
ENSG00000168394.9	TAP1	TAP1	TAP1.01_01_01_02	Yes	primary	0.218377	0.163503	0.143812	0.255571	0.373961
ENSG00000168394.9	TAP1	TAP1	TAP1.01_01_01_03	Yes	primary	0.161098	0.887858	0.179382	7.43855e-07	7.1626e-06
ENSG00000168394.9	TAP1	TAP1	TAP1.01_01_01_03	Yes	conditional on the lead primary SNP eQTL	0.161098	0.570885	0.184932	0.00202185	0.00663212
ENSG00000168394.9	TAP1	TAP1	TAP1.01_01_01_03	Yes	conditional on the lead primary and conditional 1 SNP eQTL	0.161098	0.483974	0.189142	0.0105037	0.0276242
ENSG00000168394.9	TAP1	TAP1	TAP1.01_01_01_04	Yes	primary	0.0644391	1.07018	0.25641	2.99677e-05	0.000186993
ENSG00000168394.9	TAP1	TAP1	TAP1.01_01_01_04	Yes	conditional on the lead primary and conditional 1 SNP eQTL	0.0644391	0.911045	0.243513	0.000183099	0.000881531
ENSG00000168394.9	TAP1	TAP1	TAP1.01_01_01_04	Yes	conditional on the lead primary SNP eQTL	0.0644391	0.927876	0.25116	0.000220439	0.00102814
ENSG00000168394.9	TAP1	TAP1	TAP1.01_01_01_05	No	conditional on the lead primary SNP eQTL	0.180191	-0.250354	0.136476	0.0665915	0.127582
ENSG00000168394.9	TAP1	TAP1	TAP1.01_01_01_05	No	conditional on the lead primary and conditional 1 SNP eQTL	0.180191	-0.135656	0.142214	0.340144	0.467808
ENSG00000168394.9	TAP1	TAP1	TAP1.01_01_01_05	No	primary	0.180191	0.13048	0.139265	0.3488	0.47542
ENSG00000204267.9	TAP2	TAP2	TAP2.01_01_02	Yes	primary	0.274463	0.0314653	0.122946	0.798006	0.864628
ENSG00000204267.9	TAP2	TAP2	TAP2.01_01_03_01	No	primary	0.137232	-0.496478	0.145029	0.000618663	0.002414
ENSG00000204267.9	TAP2	TAP2	TAP2.01_01_03_02	Yes	primary	0.0918854	0.444839	0.209482	0.0337102	0.0731819
ENSG00000204267.9	TAP2	TAP2	TAP2.01_01_03_03	Yes	primary	0.0369928	-0.361964	0.262057	0.167205	0.266902
ENSG00000204267.9	TAP2	TAP2	TAP2.01_04	Yes	primary	0.137232	-0.385227	0.151357	0.0109228	0.0284757
ENSG00000204267.9	TAP2	TAP2	TAP2.02_01_02_01	Yes	primary	0.238663	0.641131	0.150438	2.0283e-05	0.000145261
ENSG00000204267.9	TAP2	TAP2	TAP2.02_01_02_02	No	primary	0.075179	0.233073	0.172238	0.175991	0.278358

## Sheet: Table S9B - non-self
eGene information		HLA allele					HLA-type eQTL
Gene ID	Gene name	HLA gene	Allele	HWE	Type	Allelic frequency	Beta	Standard error of beta	p-value	Benjamini-Hochberg-adjusted p-value
ENSG00000176998.3	HCG4	HLA-A	A.01_01_01_01	Yes	primary	0.161098	-1.51491	0.179791	1.11022e-16	9.60126e-14
ENSG00000204644.5	ZFP57	HLA-A	A.01_01_01_01	Yes	primary	0.161098	1.72829	0.170555	1.11022e-16	9.60126e-14
ENSG00000204644.5	ZFP57	HLA-A	A.01_01_01_01	Yes	conditional on the lead primary and conditional 1 SNP eQTL	0.161098	1.83725	0.210157	1.11022e-16	9.60126e-14
ENSG00000204308.6	RNF5	HLA-A	A.01_01_01_01	Yes	primary	0.161098	-1.32701	0.173205	1.83187e-14	1.178e-11
ENSG00000227766.1	HCG4P5	HLA-A	A.01_01_01_01	Yes	conditional on the lead primary and conditional 1 SNP eQTL	0.161098	-1.56709	0.224614	3.01936e-12	1.32848e-09
ENSG00000204644.5	ZFP57	HLA-A	A.01_01_01_01	Yes	conditional on the lead primary SNP eQTL	0.161098	1.60545	0.273213	4.1981e-09	1.09293e-06
ENSG00000204632.7	HLA-G	HLA-A	A.01_01_01_01	Yes	primary	0.161098	-1.10415	0.191396	7.97718e-09	1.95501e-06
ENSG00000204644.5	ZFP57	HLA-A	A.01_01_01_01	Yes	conditional on the lead primary, conditional 1 and conditional 2 SNP eQTL	0.161098	2.3541	0.427014	3.52891e-08	7.39576e-06
ENSG00000237669.1	HCG4P3	HLA-A	A.01_01_01_01	Yes	primary	0.161098	1.07463	0.207481	2.22607e-07	3.89499e-05
ENSG00000206341.6	HLA-H	HLA-A	A.01_01_01_01	Yes	primary	0.161098	-1.07641	0.209571	2.80273e-07	4.76009e-05
ENSG00000204525.10	HLA-C	HLA-A	A.01_01_01_01	Yes	conditional on the lead primary and conditional 1 SNP eQTL	0.161098	0.822735	0.16424	5.46144e-07	8.43753e-05
ENSG00000204525.10	HLA-C	HLA-A	A.01_01_01_01	Yes	conditional on the lead primary SNP eQTL	0.161098	0.823824	0.164746	5.71589e-07	8.77657e-05
ENSG00000206341.6	HLA-H	HLA-A	A.01_01_01_01	Yes	conditional on the lead primary, conditional 1 and conditional 2 SNP eQTL	0.161098	-0.993491	0.211772	2.7144e-06	0.000342736
ENSG00000227766.1	HCG4P5	HLA-A	A.01_01_01_01	Yes	conditional on the lead primary SNP eQTL	0.161098	-1.17254	0.252739	3.49525e-06	0.000424155
ENSG00000204525.10	HLA-C	HLA-A	A.01_01_01_01	Yes	primary	0.161098	0.745344	0.180447	3.61912e-05	0.00318474
ENSG00000239257.1	RPL23AP1	HLA-A	A.01_01_01_01	Yes	primary	0.161098	0.818563	0.198847	3.84572e-05	0.00335277
ENSG00000066379.10	ZNRD1	HLA-A	A.01_01_01_01	Yes	conditional on the lead primary SNP eQTL	0.161098	-0.656226	0.162297	5.26868e-05	0.00433088
ENSG00000204576.7	PRR3	HLA-A	A.01_01_01_01	Yes	conditional on the lead primary SNP eQTL	0.161098	-0.801842	0.199288	5.73294e-05	0.00461391
ENSG00000206341.6	HLA-H	HLA-A	A.01_01_01_01	Yes	conditional on the lead primary SNP eQTL	0.161098	-0.716042	0.178948	6.29708e-05	0.00497668
ENSG00000206341.6	HLA-H	HLA-A	A.01_01_01_01	Yes	conditional on the lead primary and conditional 1 SNP eQTL	0.161098	-0.712909	0.179231	6.96119e-05	0.00537907
ENSG00000237669.1	HCG4P3	HLA-A	A.01_01_01_01	Yes	conditional on the lead primary SNP eQTL	0.161098	0.70371	0.194719	0.000301545	0.0169311
ENSG00000237669.1	HCG4P3	HLA-A	A.01_01_01_01	Yes	conditional on the lead primary, conditional 1 and conditional 2 SNP eQTL	0.161098	0.698097	0.194737	0.000337303	0.0184567
ENSG00000204536.9	CCHCR1	HLA-A	A.01_01_01_01	Yes	primary	0.161098	-0.687979	0.19313	0.000367669	0.0197027
ENSG00000137411.12	VARS2	HLA-A	A.01_01_01_01	Yes	primary	0.161098	-0.548941	0.155023	0.000398559	0.0209692
ENSG00000204472.8	AIF1	HLA-A	A.01_01_01_01	Yes	primary	0.161098	0.577707	0.165606	0.000485822	0.0242206
ENSG00000137310.7	TCF19	HLA-A	A.01_01_01_01	Yes	primary	0.161098	-0.515201	0.155406	0.000915828	0.0380481
ENSG00000237669.1	HCG4P3	HLA-A	A.01_01_01_01	Yes	conditional on the lead primary and conditional 1 SNP eQTL	0.161098	0.640045	0.19714	0.00116768	0.0454732
ENSG00000204576.7	PRR3	HLA-A	A.01_01_01_01	Yes	conditional on the lead primary, conditional 1 and conditional 2 SNP eQTL	0.161098	-0.661329	0.207602	0.00144473	0.0526385
ENSG00000204257.10	HLA-DMA	HLA-A	A.01_01_01_01	Yes	primary	0.161098	0.612789	0.195014	0.00167633	0.0578814
ENSG00000204536.9	CCHCR1	HLA-A	A.01_01_01_01	Yes	conditional on the lead primary SNP eQTL	0.161098	-0.542218	0.177261	0.00222174	0.0702349
ENSG00000204538.3	PSORS1C2	HLA-A	A.01_01_01_01	Yes	primary	0.161098	-0.560247	0.188415	0.00294445	0.0838828
ENSG00000204576.7	PRR3	HLA-A	A.01_01_01_01	Yes	primary	0.161098	-0.442188	0.149736	0.00314572	0.0875579
ENSG00000137310.7	TCF19	HLA-A	A.01_01_01_01	Yes	conditional on the lead primary and conditional 1 SNP eQTL	0.161098	-0.436133	0.148406	0.00329501	0.089855
ENSG00000137310.7	TCF19	HLA-A	A.01_01_01_01	Yes	conditional on the lead primary SNP eQTL	0.161098	-0.434532	0.148641	0.00346279	0.0930241
ENSG00000230795.2	HLA-K	HLA-A	A.01_01_01_01	Yes	primary	0.161098	0.588246	0.202323	0.00364376	0.0959682
ENSG00000204308.6	RNF5	HLA-A	A.01_01_01_01	Yes	conditional on the lead primary and conditional 1 SNP eQTL	0.161098	-0.692097	0.240711	0.00403738	0.102485
ENSG00000204257.10	HLA-DMA	HLA-A	A.01_01_01_01	Yes	conditional on the lead primary and conditional 1 SNP eQTL	0.161098	0.641202	0.228082	0.00493445	0.115693
ENSG00000204385.6	SLC44A4	HLA-A	A.01_01_01_01	Yes	primary	0.161098	0.439483	0.161372	0.0064609	0.136774
ENSG00000204308.6	RNF5	HLA-A	A.01_01_01_01	Yes	conditional on the lead primary SNP eQTL	0.161098	-0.634756	0.236504	0.0072767	0.146464
ENSG00000204385.6	SLC44A4	HLA-A	A.01_01_01_01	Yes	conditional on the lead primary SNP eQTL	0.161098	0.404669	0.151715	0.00764652	0.150133
ENSG00000227766.1	HCG4P5	HLA-A	A.01_01_01_01	Yes	primary	0.161098	-0.54151	0.203757	0.00786926	0.152713
ENSG00000214922.5	HLA-F-AS1	HLA-A	A.01_01_01_01	Yes	primary	0.161098	-0.471954	0.182248	0.009608	0.171463
ENSG00000204385.6	SLC44A4	HLA-A	A.01_01_01_01	Yes	conditional on the lead primary and conditional 1 SNP eQTL	0.161098	0.392413	0.152301	0.00997882	0.175623
ENSG00000204439.3	C6orf47	HLA-A	A.01_01_01_01	Yes	conditional on the lead primary SNP eQTL	0.161098	-0.384255	0.155715	0.0135988	0.208302
ENSG00000204475.5	NCR3	HLA-A	A.01_01_01_01	Yes	primary	0.161098	0.460907	0.188493	0.0144767	0.216068
ENSG00000204301.5	NOTCH4	HLA-A	A.01_01_01_01	Yes	primary	0.161098	0.432608	0.177896	0.0150238	0.22043
ENSG00000204315.3	FKBPL	HLA-A	A.01_01_01_01	Yes	conditional on the lead primary SNP eQTL	0.161098	-0.375685	0.154571	0.0150778	0.22092
ENSG00000066379.10	ZNRD1	HLA-A	A.01_01_01_01	Yes	primary	0.161098	-0.415812	0.171822	0.01552	0.224686
ENSG00000204444.6	APOM	HLA-A	A.01_01_01_01	Yes	primary	0.161098	-0.369574	0.153655	0.016163	0.229464
ENSG00000227507.2	LTB	HLA-A	A.01_01_01_01	Yes	conditional on the lead primary, conditional 1 and conditional 2 SNP eQTL	0.161098	0.519862	0.220618	0.0184536	0.244956
ENSG00000204388.5	HSPA1B	HLA-A	A.01_01_01_01	Yes	conditional on the lead primary and conditional 1 SNP eQTL	0.161098	0.675312	0.291366	0.0204632	0.257573
ENSG00000258388.3	PPT2-EGFL8	HLA-A	A.01_01_01_01	Yes	primary	0.161098	-0.472135	0.204549	0.0209895	0.260909
ENSG00000204538.3	PSORS1C2	HLA-A	A.01_01_01_01	Yes	conditional on the lead primary SNP eQTL	0.161098	-0.397299	0.173856	0.0223003	0.268969
ENSG00000204472.8	AIF1	HLA-A	A.01_01_01_01	Yes	conditional on the lead primary, conditional 1 and conditional 2 SNP eQTL	0.161098	0.384487	0.168914	0.0228323	0.272293
ENSG00000204257.10	HLA-DMA	HLA-A	A.01_01_01_01	Yes	conditional on the lead primary SNP eQTL	0.161098	0.494762	0.218142	0.023325	0.274779
ENSG00000204472.8	AIF1	HLA-A	A.01_01_01_01	Yes	conditional on the lead primary SNP eQTL	0.161098	0.381168	0.168722	0.0238744	0.278229
ENSG00000204618.4	RNF39	HLA-A	A.01_01_01_01	Yes	primary	0.161098	-0.436839	0.193815	0.0242025	0.279959
ENSG00000228962.1	HCG23	HLA-A	A.01_01_01_01	Yes	primary	0.161098	0.439662	0.199505	0.027541	0.296442
ENSG00000204538.3	PSORS1C2	HLA-A	A.01_01_01_01	Yes	conditional on the lead primary and conditional 1 SNP eQTL	0.161098	-0.396075	0.185483	0.032731	0.3217
ENSG00000270604.1	HCG17	HLA-A	A.01_01_01_01	Yes	primary	0.161098	-0.422393	0.199646	0.034369	0.32878
ENSG00000204438.6	GPANK1	HLA-A	A.01_01_01_01	Yes	primary	0.161098	-0.371687	0.175998	0.0346969	0.330529
ENSG00000227507.2	LTB	HLA-A	A.01_01_01_01	Yes	primary	0.161098	0.305975	0.144976	0.0348133	0.331151
ENSG00000204469.8	PRRC2A	HLA-A	A.01_01_01_01	Yes	primary	0.161098	-0.321936	0.154761	0.0375052	0.342259
ENSG00000179344.12	HLA-DQB1	HLA-A	A.01_01_01_01	Yes	conditional on the lead primary SNP eQTL	0.161098	0.410568	0.20052	0.0406069	0.353323
ENSG00000272221.1	XXbac-BPG181B23.7	HLA-A	A.01_01_01_01	Yes	primary	0.161098	-0.432226	0.211703	0.041185	0.355406
ENSG00000168477.13	TNXB	HLA-A	A.01_01_01_01	Yes	primary	0.161098	0.332262	0.168522	0.0486519	0.381427
ENSG00000214922.5	HLA-F-AS1	HLA-A	A.01_01_01_01	Yes	conditional on the lead primary SNP eQTL	0.161098	-0.329468	0.168434	0.0504574	0.388782
ENSG00000204520.8	MICA	HLA-A	A.01_01_01_01	Yes	conditional on the lead primary SNP eQTL	0.161098	-0.340904	0.176069	0.0528433	0.396942
ENSG00000206337.6	HCP5	HLA-A	A.01_01_01_01	Yes	primary	0.161098	-0.351043	0.181916	0.0536443	0.39882
ENSG00000230795.2	HLA-K	HLA-A	A.01_01_01_01	Yes	conditional on the lead primary SNP eQTL	0.161098	0.359299	0.186577	0.0541369	0.400467
ENSG00000204388.5	HSPA1B	HLA-A	A.01_01_01_01	Yes	primary	0.161098	0.327482	0.175728	0.0623821	0.422496
ENSG00000176998.3	HCG4	HLA-A	A.01_01_01_01	Yes	conditional on the lead primary SNP eQTL	0.161098	-0.750162	0.403236	0.0628354	0.424339
ENSG00000204463.8	BAG6	HLA-A	A.01_01_01_01	Yes	conditional on the lead primary and conditional 1 SNP eQTL	0.161098	0.327008	0.176481	0.063891	0.427448
ENSG00000179344.12	HLA-DQB1	HLA-A	A.01_01_01_01	Yes	primary	0.161098	-0.364904	0.196984	0.0639608	0.427568
ENSG00000204387.8	C6orf48	HLA-A	A.01_01_01_01	Yes	conditional on the lead primary SNP eQTL	0.161098	-0.338815	0.183973	0.0655261	0.431688
ENSG00000204439.3	C6orf47	HLA-A	A.01_01_01_01	Yes	primary	0.161098	-0.288785	0.156969	0.0658038	0.43246
ENSG00000272221.1	XXbac-BPG181B23.7	HLA-A	A.01_01_01_01	Yes	conditional on the lead primary and conditional 1 SNP eQTL	0.161098	-0.350919	0.191731	0.0672102	0.435665
ENSG00000204305.9	AGER	HLA-A	A.01_01_01_01	Yes	primary	0.161098	0.280281	0.155878	0.0721652	0.449356
ENSG00000213676.6	ATF6B	HLA-A	A.01_01_01_01	Yes	conditional on the lead primary SNP eQTL	0.161098	-0.394171	0.224459	0.0790722	0.467515
ENSG00000168394.9	TAP1	HLA-A	A.01_01_01_01	Yes	primary	0.161098	-0.330767	0.18899	0.0800866	0.469511
ENSG00000214922.5	HLA-F-AS1	HLA-A	A.01_01_01_01	Yes	conditional on the lead primary, conditional 1 and conditional 2 SNP eQTL	0.161098	-0.299917	0.172537	0.0821628	0.474478
ENSG00000229836.1	XXbac-BPG248L24.10	HLA-A	A.01_01_01_01	Yes	primary	0.161098	0.30903	0.17981	0.0856788	0.483342
ENSG00000198563.9	DDX39B	HLA-A	A.01_01_01_01	Yes	primary	0.161098	0.0838009	0.0489154	0.0866791	0.485628
ENSG00000206344.6	HCG27	HLA-A	A.01_01_01_01	Yes	primary	0.161098	0.341587	0.200028	0.0876921	0.487895
ENSG00000204599.10	TRIM39	HLA-A	A.01_01_01_01	Yes	primary	0.161098	-0.200424	0.122887	0.102899	0.517853
ENSG00000213719.4	CLIC1	HLA-A	A.01_01_01_01	Yes	conditional on the lead primary SNP eQTL	0.161098	0.238022	0.146057	0.103175	0.51869
ENSG00000204394.8	VARS	HLA-A	A.01_01_01_01	Yes	primary	0.161098	0.250477	0.155003	0.106106	0.524754
ENSG00000204463.8	BAG6	HLA-A	A.01_01_01_01	Yes	primary	0.161098	-0.26456	0.165085	0.109031	0.529298
ENSG00000219797.2	PPIAP9	HLA-A	A.01_01_01_01	Yes	primary	0.161098	0.326948	0.205258	0.111191	0.532277
ENSG00000272273.1	XXbac-BPG252P9.10	HLA-A	A.01_01_01_01	Yes	primary	0.161098	0.311905	0.196688	0.112788	0.53526
ENSG00000224389.4	C4B	HLA-A	A.01_01_01_01	Yes	primary	0.161098	0.301629	0.190373	0.1131	0.535684
ENSG00000213760.6	ATP6V1G2	HLA-A	A.01_01_01_01	Yes	primary	0.161098	-0.308936	0.198646	0.119895	0.54641
ENSG00000272221.1	XXbac-BPG181B23.7	HLA-A	A.01_01_01_01	Yes	conditional on the lead primary SNP eQTL	0.161098	-0.294004	0.194968	0.131566	0.564968
ENSG00000223865.6	HLA-DPB1	HLA-A	A.01_01_01_01	Yes	conditional on the lead primary SNP eQTL	0.161098	-0.235731	0.156519	0.132044	0.565528
ENSG00000204520.8	MICA	HLA-A	A.01_01_01_01	Yes	conditional on the lead primary and conditional 1 SNP eQTL	0.161098	-0.273982	0.182337	0.132939	0.566031
ENSG00000198563.9	DDX39B	HLA-A	A.01_01_01_01	Yes	conditional on the lead primary SNP eQTL	0.161098	0.0700767	0.0468947	0.135087	0.569916
ENSG00000196735.7	HLA-DQA1	HLA-A	A.01_01_01_01	Yes	primary	0.161098	-0.316997	0.212991	0.13667	0.57169
ENSG00000230622.1	UQCRHP1	HLA-A	A.01_01_01_01	Yes	primary	0.161098	-0.30256	0.203335	0.136754	0.57169
ENSG00000204261.4	TAPSAR1	HLA-A	A.01_01_01_01	Yes	primary	0.161098	-0.293108	0.197532	0.137849	0.573012
ENSG00000237923.1	XXbac-BPG27H4.8	HLA-A	A.01_01_01_01	Yes	primary	0.161098	0.21603	0.149443	0.148299	0.589233
ENSG00000204348.5	DXO	HLA-A	A.01_01_01_01	Yes	conditional on the lead primary SNP eQTL	0.161098	-0.219661	0.158089	0.164689	0.610479
ENSG00000255152.4	MSH5-SAPCD1	HLA-A	A.01_01_01_01	Yes	primary	0.161098	-0.253393	0.184725	0.170148	0.617423
ENSG00000204267.9	TAP2	HLA-A	A.01_01_01_01	Yes	primary	0.161098	-0.249227	0.184245	0.176154	0.626153
ENSG00000254870.1	ATP6V1G2-DDX39B	HLA-A	A.01_01_01_01	Yes	primary	0.161098	0.19456	0.148996	0.191618	0.644794
ENSG00000204410.10	MSH5	HLA-A	A.01_01_01_01	Yes	primary	0.161098	-0.200068	0.154346	0.194898	0.648842
ENSG00000204463.8	BAG6	HLA-A	A.01_01_01_01	Yes	conditional on the lead primary SNP eQTL	0.161098	0.223078	0.173509	0.198553	0.65266
ENSG00000237042.1	MICG	HLA-A	A.01_01_01_01	Yes	primary	0.161098	0.184714	0.143766	0.198854	0.652927
ENSG00000231074.4	HCG18	HLA-A	A.01_01_01_01	Yes	conditional on the lead primary SNP eQTL	0.161098	-0.157065	0.122292	0.19902	0.653025
ENSG00000213719.4	CLIC1	HLA-A	A.01_01_01_01	Yes	primary	0.161098	-0.172959	0.135639	0.202257	0.657037
ENSG00000204592.5	HLA-E	HLA-A	A.01_01_01_01	Yes	conditional on the lead primary SNP eQTL	0.161098	0.212128	0.167273	0.204743	0.658971
ENSG00000204564.7	C6orf136	HLA-A	A.01_01_01_01	Yes	primary	0.161098	-0.243318	0.194104	0.210007	0.664531
ENSG00000204574.8	ABCF1	HLA-A	A.01_01_01_01	Yes	conditional on the lead primary and conditional 1 SNP eQTL	0.161098	0.164606	0.132399	0.213773	0.667879
ENSG00000227507.2	LTB	HLA-A	A.01_01_01_01	Yes	conditional on the lead primary and conditional 1 SNP eQTL	0.161098	0.247422	0.199588	0.215099	0.668992
ENSG00000254870.1	ATP6V1G2-DDX39B	HLA-A	A.01_01_01_01	Yes	conditional on the lead primary, conditional 1 and conditional 2 SNP eQTL	0.161098	0.184961	0.150809	0.220026	0.673925
ENSG00000270604.1	HCG17	HLA-A	A.01_01_01_01	Yes	conditional on the lead primary SNP eQTL	0.161098	-0.370841	0.303267	0.221398	0.675351
ENSG00000137343.13	ATAT1	HLA-A	A.01_01_01_01	Yes	primary	0.161098	-0.194118	0.158824	0.221625	0.675511
ENSG00000198502.5	HLA-DRB5	HLA-A	A.01_01_01_01	Yes	primary	0.161098	-0.242702	0.206555	0.239995	0.69198
ENSG00000204387.8	C6orf48	HLA-A	A.01_01_01_01	Yes	primary	0.161098	-0.160287	0.139349	0.250039	0.701773
ENSG00000204310.6	AGPAT1	HLA-A	A.01_01_01_01	Yes	conditional on the lead primary and conditional 1 SNP eQTL	0.161098	-0.185531	0.163157	0.255484	0.706801
ENSG00000204623.4	ZNRD1-AS1	HLA-A	A.01_01_01_01	Yes	primary	0.161098	0.196825	0.173683	0.257111	0.708616
ENSG00000204371.7	EHMT2	HLA-A	A.01_01_01_01	Yes	conditional on the lead primary, conditional 1 and conditional 2 SNP eQTL	0.161098	-0.164007	0.145131	0.25845	0.709861
ENSG00000204371.7	EHMT2	HLA-A	A.01_01_01_01	Yes	conditional on the lead primary SNP eQTL	0.161098	-0.162485	0.14473	0.261575	0.712849
ENSG00000223865.6	HLA-DPB1	HLA-A	A.01_01_01_01	Yes	conditional on the lead primary, conditional 1 and conditional 2 SNP eQTL	0.161098	-0.178123	0.159019	0.262658	0.713478
ENSG00000242574.4	HLA-DMB	HLA-A	A.01_01_01_01	Yes	primary	0.161098	0.217245	0.196024	0.267751	0.717749
ENSG00000204389.8	HSPA1A	HLA-A	A.01_01_01_01	Yes	conditional on the lead primary SNP eQTL	0.161098	0.253662	0.228919	0.267825	0.717818
ENSG00000204574.8	ABCF1	HLA-A	A.01_01_01_01	Yes	conditional on the lead primary SNP eQTL	0.161098	0.206583	0.19178	0.281396	0.727939
ENSG00000230313.1	HCG24	HLA-A	A.01_01_01_01	Yes	conditional on the lead primary SNP eQTL	0.161098	0.195281	0.182705	0.285144	0.731272
ENSG00000213676.6	ATF6B	HLA-A	A.01_01_01_01	Yes	conditional on the lead primary and conditional 1 SNP eQTL	0.161098	-0.286909	0.27138	0.290411	0.736346
ENSG00000204304.7	PBX2	HLA-A	A.01_01_01_01	Yes	primary	0.161098	-0.164419	0.156774	0.294286	0.739967
ENSG00000166278.10	C2	HLA-A	A.01_01_01_01	Yes	primary	0.161098	0.193239	0.186044	0.298956	0.74358
ENSG00000204386.6	NEU1	HLA-A	A.01_01_01_01	Yes	primary	0.161098	0.169127	0.165329	0.306319	0.747745
ENSG00000229836.1	XXbac-BPG248L24.10	HLA-A	A.01_01_01_01	Yes	conditional on the lead primary SNP eQTL	0.161098	0.178719	0.176708	0.311834	0.751366
ENSG00000204580.7	DDR1	HLA-A	A.01_01_01_01	Yes	primary	0.161098	-0.131382	0.129932	0.311939	0.751366
ENSG00000230313.1	HCG24	HLA-A	A.01_01_01_01	Yes	primary	0.161098	0.20115	0.199938	0.314385	0.752981
ENSG00000254870.1	ATP6V1G2-DDX39B	HLA-A	A.01_01_01_01	Yes	conditional on the lead primary SNP eQTL	0.161098	0.142108	0.143798	0.323033	0.759794
ENSG00000214922.5	HLA-F-AS1	HLA-A	A.01_01_01_01	Yes	conditional on the lead primary and conditional 1 SNP eQTL	0.161098	-0.173231	0.177005	0.327737	0.762811
ENSG00000204389.8	HSPA1A	HLA-A	A.01_01_01_01	Yes	primary	0.161098	0.168989	0.172996	0.328649	0.763501
ENSG00000204520.8	MICA	HLA-A	A.01_01_01_01	Yes	conditional on the lead primary, conditional 1 and conditional 2 SNP eQTL	0.161098	-0.178118	0.187209	0.341381	0.772165
ENSG00000204304.7	PBX2	HLA-A	A.01_01_01_01	Yes	conditional on the lead primary SNP eQTL	0.161098	-0.216181	0.230309	0.347908	0.77678
ENSG00000204642.9	HLA-F	HLA-A	A.01_01_01_01	Yes	conditional on the lead primary SNP eQTL	0.161098	0.165954	0.178532	0.352605	0.779462
ENSG00000213719.4	CLIC1	HLA-A	A.01_01_01_01	Yes	conditional on the lead primary and conditional 1 SNP eQTL	0.161098	0.13457	0.146555	0.358502	0.784103
ENSG00000204444.6	APOM	HLA-A	A.01_01_01_01	Yes	conditional on the lead primary, conditional 1 and conditional 2 SNP eQTL	0.161098	-0.201383	0.22133	0.362888	0.78658
ENSG00000204351.7	SKIV2L	HLA-A	A.01_01_01_01	Yes	primary	0.161098	-0.169394	0.187197	0.365519	0.788309
ENSG00000137404.10	NRM	HLA-A	A.01_01_01_01	Yes	primary	0.161098	-0.146755	0.163607	0.369722	0.790578
ENSG00000146112.7	PPP1R18	HLA-A	A.01_01_01_01	Yes	primary	0.161098	-0.127404	0.142954	0.37281	0.792603
ENSG00000168477.13	TNXB	HLA-A	A.01_01_01_01	Yes	conditional on the lead primary SNP eQTL	0.161098	0.248702	0.280339	0.374999	0.79352
ENSG00000168477.13	TNXB	HLA-A	A.01_01_01_01	Yes	conditional on the lead primary, conditional 1 and conditional 2 SNP eQTL	0.161098	0.248919	0.281337	0.376281	0.794571
ENSG00000244355.3	LY6G6D	HLA-A	A.01_01_01_01	Yes	primary	0.161098	0.170816	0.19413	0.378912	0.796263
ENSG00000204427.7	ABHD16A	HLA-A	A.01_01_01_01	Yes	primary	0.161098	0.138387	0.162435	0.394241	0.806469
ENSG00000243753.1	HLA-L	HLA-A	A.01_01_01_01	Yes	conditional on the lead primary SNP eQTL	0.161098	-0.155341	0.18501	0.401113	0.810434
ENSG00000228962.1	HCG23	HLA-A	A.01_01_01_01	Yes	conditional on the lead primary SNP eQTL	0.161098	0.148926	0.1829	0.415501	0.819178
ENSG00000242574.4	HLA-DMB	HLA-A	A.01_01_01_01	Yes	conditional on the lead primary, conditional 1 and conditional 2 SNP eQTL	0.161098	0.154678	0.190136	0.415924	0.819407
ENSG00000235781.1	XXbac-BPG249D20.9	HLA-A	A.01_01_01_01	Yes	primary	0.161098	0.168719	0.209125	0.41979	0.821405
ENSG00000204315.3	FKBPL	HLA-A	A.01_01_01_01	Yes	conditional on the lead primary and conditional 1 SNP eQTL	0.161098	-0.146694	0.181908	0.420001	0.821474
ENSG00000204592.5	HLA-E	HLA-A	A.01_01_01_01	Yes	conditional on the lead primary and conditional 1 SNP eQTL	0.161098	0.139546	0.17377	0.421944	0.822004
ENSG00000241106.2	HLA-DOB	HLA-A	A.01_01_01_01	Yes	conditional on the lead primary and conditional 1 SNP eQTL	0.161098	0.209102	0.260502	0.422155	0.822339
ENSG00000223865.6	HLA-DPB1	HLA-A	A.01_01_01_01	Yes	conditional on the lead primary and conditional 1 SNP eQTL	0.161098	-0.123064	0.154075	0.424448	0.823362
ENSG00000204568.7	MRPS18B	HLA-A	A.01_01_01_01	Yes	primary	0.161098	-0.136452	0.171235	0.425527	0.823642
ENSG00000231074.4	HCG18	HLA-A	A.01_01_01_01	Yes	conditional on the lead primary, conditional 1 and conditional 2 SNP eQTL	0.161098	-0.0976707	0.125064	0.434821	0.829348
ENSG00000244731.3	C4A	HLA-A	A.01_01_01_01	Yes	primary	0.161098	-0.155886	0.20059	0.437079	0.83046
ENSG00000204569.5	PPP1R10	HLA-A	A.01_01_01_01	Yes	primary	0.161098	0.148672	0.198262	0.453329	0.838741
ENSG00000204619.3	PPP1R11	HLA-A	A.01_01_01_01	Yes	primary	0.161098	0.136506	0.182543	0.454577	0.839271
ENSG00000204366.3	ZBTB12	HLA-A	A.01_01_01_01	Yes	primary	0.161098	-0.0907588	0.124321	0.465369	0.844169
ENSG00000243753.1	HLA-L	HLA-A	A.01_01_01_01	Yes	primary	0.161098	0.133771	0.189373	0.479947	0.851175
ENSG00000214894.2	LINC00243	HLA-A	A.01_01_01_01	Yes	primary	0.161098	0.141745	0.203811	0.48676	0.854448
ENSG00000204421.2	LY6G6C	HLA-A	A.01_01_01_01	Yes	primary	0.161098	0.136913	0.201696	0.497259	0.859259
ENSG00000213654.5	GPSM3	HLA-A	A.01_01_01_01	Yes	primary	0.161098	0.10546	0.155447	0.497498	0.859328
ENSG00000241404.2	EGFL8	HLA-A	A.01_01_01_01	Yes	conditional on the lead primary SNP eQTL	0.161098	-0.115829	0.173604	0.504642	0.862516
ENSG00000234745.5	HLA-B	HLA-A	A.01_01_01_01	Yes	primary	0.161098	-0.131107	0.196748	0.505174	0.862716
ENSG00000241404.2	EGFL8	HLA-A	A.01_01_01_01	Yes	conditional on the lead primary and conditional 1 SNP eQTL	0.161098	-0.115738	0.1738	0.50546	0.862938
ENSG00000204371.7	EHMT2	HLA-A	A.01_01_01_01	Yes	primary	0.161098	0.0976532	0.147	0.506494	0.863413
ENSG00000228415.2	PTMAP1	HLA-A	A.01_01_01_01	Yes	conditional on the lead primary SNP eQTL	0.161098	-0.119528	0.18015	0.507018	0.863647
ENSG00000204287.9	HLA-DRA	HLA-A	A.01_01_01_01	Yes	primary	0.161098	0.141309	0.213587	0.508227	0.864154
ENSG00000204482.6	LST1	HLA-A	A.01_01_01_01	Yes	primary	0.161098	0.137748	0.20864	0.509113	0.864639
ENSG00000228727.4	SAPCD1	HLA-A	A.01_01_01_01	Yes	primary	0.161098	-0.0940123	0.142748	0.510161	0.864882
ENSG00000213780.6	GTF2H4	HLA-A	A.01_01_01_01	Yes	primary	0.161098	-0.116633	0.178131	0.512621	0.865803
ENSG00000204560.5	DHX16	HLA-A	A.01_01_01_01	Yes	primary	0.161098	0.0991306	0.152806	0.516508	0.867999
ENSG00000204396.6	VWA7	HLA-A	A.01_01_01_01	Yes	conditional on the lead primary SNP eQTL	0.161098	-0.126526	0.199317	0.525562	0.872088
ENSG00000234745.5	HLA-B	HLA-A	A.01_01_01_01	Yes	conditional on the lead primary SNP eQTL	0.161098	0.113774	0.182887	0.533878	0.875073
ENSG00000204287.9	HLA-DRA	HLA-A	A.01_01_01_01	Yes	conditional on the lead primary SNP eQTL	0.161098	-0.115421	0.191023	0.545694	0.880596
ENSG00000224557.3	HLA-DPB2	HLA-A	A.01_01_01_01	Yes	conditional on the lead primary and conditional 1 SNP eQTL	0.161098	0.101113	0.172007	0.55664	0.886452
ENSG00000234127.4	TRIM26	HLA-A	A.01_01_01_01	Yes	conditional on the lead primary SNP eQTL	0.161098	0.078162	0.133222	0.557403	0.886797
ENSG00000224557.3	HLA-DPB2	HLA-A	A.01_01_01_01	Yes	conditional on the lead primary SNP eQTL	0.161098	0.0995995	0.170193	0.558403	0.887041
ENSG00000221988.8	PPT2	HLA-A	A.01_01_01_01	Yes	primary	0.161098	-0.0964866	0.165369	0.559583	0.887367
ENSG00000200816.1	SNORA38	HLA-A	A.01_01_01_01	Yes	primary	0.161098	-0.0948407	0.164865	0.565113	0.889124
ENSG00000240053.8	LY6G5B	HLA-A	A.01_01_01_01	Yes	conditional on the lead primary SNP eQTL	0.161098	0.0718089	0.128806	0.57719	0.894509
ENSG00000240053.8	LY6G5B	HLA-A	A.01_01_01_01	Yes	primary	0.161098	0.0741295	0.134108	0.580428	0.895396
ENSG00000196126.6	HLA-DRB1	HLA-A	A.01_01_01_01	Yes	primary	0.161098	-0.116346	0.211297	0.58189	0.895796
ENSG00000231389.3	HLA-DPA1	HLA-A	A.01_01_01_01	Yes	primary	0.161098	-0.101079	0.188296	0.591399	0.899705
ENSG00000204348.5	DXO	HLA-A	A.01_01_01_01	Yes	primary	0.161098	-0.0894913	0.17294	0.604828	0.905127
ENSG00000204520.8	MICA	HLA-A	A.01_01_01_01	Yes	primary	0.161098	-0.0972224	0.190012	0.608887	0.906671
ENSG00000204310.6	AGPAT1	HLA-A	A.01_01_01_01	Yes	primary	0.161098	-0.0836593	0.1674	0.617246	0.910247
ENSG00000204540.6	PSORS1C1	HLA-A	A.01_01_01_01	Yes	primary	0.161098	0.103599	0.207507	0.617599	0.910257
ENSG00000204252.8	HLA-DOA	HLA-A	A.01_01_01_01	Yes	primary	0.161098	0.0914961	0.185332	0.621526	0.911349
ENSG00000168394.9	TAP1	HLA-A	A.01_01_01_01	Yes	conditional on the lead primary and conditional 1 SNP eQTL	0.161098	0.0902527	0.187734	0.630696	0.914585
ENSG00000213780.6	GTF2H4	HLA-A	A.01_01_01_01	Yes	conditional on the lead primary SNP eQTL	0.161098	0.075079	0.157853	0.63434	0.915932
ENSG00000241404.2	EGFL8	HLA-A	A.01_01_01_01	Yes	primary	0.161098	-0.085093	0.17925	0.63499	0.916244
ENSG00000231074.4	HCG18	HLA-A	A.01_01_01_01	Yes	primary	0.161098	-0.0598295	0.126227	0.635511	0.916483
ENSG00000224557.3	HLA-DPB2	HLA-A	A.01_01_01_01	Yes	primary	0.161098	0.0943628	0.199444	0.636121	0.91673
ENSG00000219797.2	PPIAP9	HLA-A	A.01_01_01_01	Yes	conditional on the lead primary SNP eQTL	0.161098	0.0940072	0.206615	0.649119	0.921236
ENSG00000272540.1	XXbac-BPG252P9.9	HLA-A	A.01_01_01_01	Yes	primary	0.161098	-0.0965746	0.213676	0.651293	0.921974
ENSG00000204438.6	GPANK1	HLA-A	A.01_01_01_01	Yes	conditional on the lead primary SNP eQTL	0.161098	0.0840135	0.192826	0.663057	0.925641
ENSG00000137312.10	FLOT1	HLA-A	A.01_01_01_01	Yes	primary	0.161098	-0.06703	0.16264	0.680239	0.929881
ENSG00000224328.1	MDC1-AS1	HLA-A	A.01_01_01_01	Yes	primary	0.161098	0.0880538	0.213784	0.680425	0.929959
ENSG00000168394.9	TAP1	HLA-A	A.01_01_01_01	Yes	conditional on the lead primary SNP eQTL	0.161098	-0.0719173	0.181041	0.691188	0.933378
ENSG00000204315.3	FKBPL	HLA-A	A.01_01_01_01	Yes	primary	0.161098	-0.0620106	0.157171	0.69318	0.933813
ENSG00000241106.2	HLA-DOB	HLA-A	A.01_01_01_01	Yes	primary	0.161098	-0.0760945	0.193748	0.694505	0.934305
ENSG00000204592.5	HLA-E	HLA-A	A.01_01_01_01	Yes	primary	0.161098	-0.0633585	0.169604	0.708727	0.9388
ENSG00000137312.10	FLOT1	HLA-A	A.01_01_01_01	Yes	conditional on the lead primary SNP eQTL	0.161098	-0.0572188	0.15622	0.714163	0.94053
ENSG00000234127.4	TRIM26	HLA-A	A.01_01_01_01	Yes	primary	0.161098	-0.0514435	0.142507	0.718108	0.941666
ENSG00000137331.11	IER3	HLA-A	A.01_01_01_01	Yes	primary	0.161098	-0.0471294	0.134218	0.725482	0.943818
ENSG00000204264.4	PSMB8	HLA-A	A.01_01_01_01	Yes	primary	0.161098	-0.0538242	0.153602	0.726028	0.943972
ENSG00000204590.8	GNL1	HLA-A	A.01_01_01_01	Yes	primary	0.161098	0.0465944	0.137328	0.734389	0.946356
ENSG00000227939.1	RPL3P2	HLA-A	A.01_01_01_01	Yes	primary	0.161098	0.0599905	0.178073	0.736202	0.946969
ENSG00000204516.5	MICB	HLA-A	A.01_01_01_01	Yes	primary	0.161098	0.0538826	0.16029	0.736753	0.947118
ENSG00000204256.8	BRD2	HLA-A	A.01_01_01_01	Yes	conditional on the lead primary SNP eQTL	0.161098	-0.0482177	0.147016	0.742931	0.949307
ENSG00000241106.2	HLA-DOB	HLA-A	A.01_01_01_01	Yes	conditional on the lead primary SNP eQTL	0.161098	0.0582793	0.177857	0.743158	0.94934
ENSG00000213676.6	ATF6B	HLA-A	A.01_01_01_01	Yes	primary	0.161098	0.0531239	0.163482	0.745217	0.949785
ENSG00000213722.4	DDAH2	HLA-A	A.01_01_01_01	Yes	primary	0.161098	0.042475	0.131544	0.746774	0.949965
ENSG00000206344.6	HCG27	HLA-A	A.01_01_01_01	Yes	conditional on the lead primary SNP eQTL	0.161098	-0.0694804	0.217435	0.749313	0.950524
ENSG00000236603.1	RANP1	HLA-A	A.01_01_01_01	Yes	primary	0.161098	0.0343027	0.10762	0.749923	0.950681
ENSG00000204310.6	AGPAT1	HLA-A	A.01_01_01_01	Yes	conditional on the lead primary SNP eQTL	0.161098	-0.0493053	0.157896	0.754839	0.952114
ENSG00000235663.1	SAPCD1-AS1	HLA-A	A.01_01_01_01	Yes	primary	0.161098	0.0643652	0.210279	0.759533	0.953128
ENSG00000204310.6	AGPAT1	HLA-A	A.01_01_01_01	Yes	conditional on the lead primary, conditional 1 and conditional 2 SNP eQTL	0.161098	-0.0490535	0.162187	0.762309	0.953425
ENSG00000250535.1	STK19P	HLA-A	A.01_01_01_01	Yes	primary	0.161098	-0.0573332	0.193475	0.766975	0.954051
ENSG00000224389.4	C4B	HLA-A	A.01_01_01_01	Yes	conditional on the lead primary SNP eQTL	0.161098	-0.0591666	0.200371	0.767777	0.954262
ENSG00000213780.6	GTF2H4	HLA-A	A.01_01_01_01	Yes	conditional on the lead primary, conditional 1 and conditional 2 SNP eQTL	0.161098	0.0461142	0.157686	0.769948	0.954758
ENSG00000204435.9	CSNK2B	HLA-A	A.01_01_01_01	Yes	primary	0.161098	0.0467695	0.16041	0.770621	0.954758
ENSG00000204531.11	POU5F1	HLA-A	A.01_01_01_01	Yes	primary	0.161098	-0.0292673	0.100544	0.770984	0.954758
ENSG00000196230.8	TUBB	HLA-A	A.01_01_01_01	Yes	primary	0.161098	0.0291566	0.100164	0.770984	0.954758
ENSG00000234745.5	HLA-B	HLA-A	A.01_01_01_01	Yes	conditional on the lead primary, conditional 1 and conditional 2 SNP eQTL	0.161098	-0.0500246	0.178757	0.779595	0.956744
ENSG00000204314.6	PRRT1	HLA-A	A.01_01_01_01	Yes	primary	0.161098	0.0480568	0.176264	0.785129	0.958087
ENSG00000204315.3	FKBPL	HLA-A	A.01_01_01_01	Yes	conditional on the lead primary, conditional 1 and conditional 2 SNP eQTL	0.161098	-0.0486569	0.178531	0.785207	0.9581
ENSG00000204389.8	HSPA1A	HLA-A	A.01_01_01_01	Yes	conditional on the lead primary, conditional 1 and conditional 2 SNP eQTL	0.161098	0.0470441	0.17738	0.790842	0.959514
ENSG00000204396.6	VWA7	HLA-A	A.01_01_01_01	Yes	primary	0.161098	-0.0533304	0.204256	0.794018	0.960438
ENSG00000234745.5	HLA-B	HLA-A	A.01_01_01_01	Yes	conditional on the lead primary and conditional 1 SNP eQTL	0.161098	-0.0473603	0.181945	0.794632	0.960593
ENSG00000204392.6	LSM2	HLA-A	A.01_01_01_01	Yes	primary	0.161098	-0.0407764	0.168147	0.80839	0.963327
ENSG00000223837.2	BRD2-IT1	HLA-A	A.01_01_01_01	Yes	primary	0.161098	0.0448103	0.204167	0.826277	0.967
ENSG00000204574.8	ABCF1	HLA-A	A.01_01_01_01	Yes	primary	0.161098	0.0287073	0.132183	0.82807	0.967675
ENSG00000204438.6	GPANK1	HLA-A	A.01_01_01_01	Yes	conditional on the lead primary, conditional 1 and conditional 2 SNP eQTL	0.161098	0.0397348	0.199656	0.84225	0.971043
ENSG00000223865.6	HLA-DPB1	HLA-A	A.01_01_01_01	Yes	primary	0.161098	-0.0330979	0.172885	0.848178	0.972259
ENSG00000204642.9	HLA-F	HLA-A	A.01_01_01_01	Yes	primary	0.161098	-0.0333511	0.187545	0.858857	0.97346
ENSG00000204599.10	TRIM39	HLA-A	A.01_01_01_01	Yes	conditional on the lead primary SNP eQTL	0.161098	-0.0218838	0.123068	0.858865	0.97346
ENSG00000204428.8	LY6G5C	HLA-A	A.01_01_01_01	Yes	conditional on the lead primary SNP eQTL	0.161098	-0.0321223	0.182595	0.860356	0.973832
ENSG00000204428.8	LY6G5C	HLA-A	A.01_01_01_01	Yes	primary	0.161098	-0.0293901	0.190861	0.87762	0.977887
ENSG00000204498.6	NFKBIL1	HLA-A	A.01_01_01_01	Yes	primary	0.161098	0.0214341	0.146751	0.883876	0.979041
ENSG00000263756.1	XXbac-BPG181M17.6	HLA-A	A.01_01_01_01	Yes	primary	0.161098	-0.0303745	0.213858	0.887056	0.979976
ENSG00000204642.9	HLA-F	HLA-A	A.01_01_01_01	Yes	conditional on the lead primary, conditional 1 and conditional 2 SNP eQTL	0.161098	-0.0270578	0.201764	0.893319	0.980919
ENSG00000263020.1	CSNK2B-LY6G5B-1181	HLA-A	A.01_01_01_01	Yes	primary	0.161098	-0.0225445	0.183106	0.90201	0.982139
ENSG00000204256.8	BRD2	HLA-A	A.01_01_01_01	Yes	primary	0.161098	0.0186696	0.153537	0.903219	0.982256
ENSG00000204390.8	HSPA1L	HLA-A	A.01_01_01_01	Yes	primary	0.161098	-0.0220341	0.195872	0.910433	0.983263
ENSG00000230313.1	HCG24	HLA-A	A.01_01_01_01	Yes	conditional on the lead primary and conditional 1 SNP eQTL	0.161098	0.0328895	0.303263	0.913637	0.983547
ENSG00000198563.9	DDX39B	HLA-A	A.01_01_01_01	Yes	conditional on the lead primary and conditional 1 SNP eQTL	0.161098	1.83489e-18	1.69439e-17	0.913764	0.9836
ENSG00000241370.1	RPP21	HLA-A	A.01_01_01_01	Yes	primary	0.161098	-0.0174427	0.164628	0.91562	0.984041
ENSG00000137337.10	MDC1	HLA-A	A.01_01_01_01	Yes	primary	0.161098	0.0169442	0.170474	0.920825	0.984739
ENSG00000204642.9	HLA-F	HLA-A	A.01_01_01_01	Yes	conditional on the lead primary and conditional 1 SNP eQTL	0.161098	0.0207118	0.211671	0.922052	0.98485
ENSG00000228415.2	PTMAP1	HLA-A	A.01_01_01_01	Yes	primary	0.161098	-0.018315	0.188373	0.922546	0.984965
ENSG00000254870.1	ATP6V1G2-DDX39B	HLA-A	A.01_01_01_01	Yes	conditional on the lead primary and conditional 1 SNP eQTL	0.161098	0.0140599	0.15269	0.926633	0.985707
ENSG00000240065.3	PSMB9	HLA-A	A.01_01_01_01	Yes	primary	0.161098	0.0153743	0.167581	0.926903	0.985775
ENSG00000204482.6	LST1	HLA-A	A.01_01_01_01	Yes	conditional on the lead primary SNP eQTL	0.161098	-0.0146221	0.201454	0.942138	0.988879
ENSG00000204444.6	APOM	HLA-A	A.01_01_01_01	Yes	conditional on the lead primary SNP eQTL	0.161098	-0.0164077	0.235727	0.944508	0.989276
ENSG00000242574.4	HLA-DMB	HLA-A	A.01_01_01_01	Yes	conditional on the lead primary SNP eQTL	0.161098	0.00801347	0.185391	0.965522	0.993564
ENSG00000236603.1	RANP1	HLA-A	A.01_01_01_01	Yes	conditional on the lead primary SNP eQTL	0.161098	0.00301132	0.103446	0.976777	0.995828
ENSG00000243753.1	HLA-L	HLA-A	A.01_01_01_01	Yes	conditional on the lead primary, conditional 1 and conditional 2 SNP eQTL	0.161098	-0.00472711	0.186561	0.979785	0.996813
ENSG00000204344.10	STK19	HLA-A	A.01_01_01_01	Yes	primary	0.161098	-0.00204708	0.167376	0.990242	0.998788
ENSG00000230795.2	HLA-K	HLA-A	A.01_01_01_01	Yes	conditional on the lead primary and conditional 1 SNP eQTL	0.161098	-0.00206361	0.25873	0.993636	0.999051
ENSG00000204356.7	NELFE	HLA-A	A.01_01_01_01	Yes	primary	0.161098	-0.000196205	0.172968	0.999095	0.999728
ENSG00000227766.1	HCG4P5	HLA-A	A.02_01_01_01	Yes	primary	0.218377	-1.28685	0.150068	1.11022e-16	9.60126e-14
ENSG00000227766.1	HCG4P5	HLA-A	A.02_01_01_01	Yes	conditional on the lead primary SNP eQTL	0.218377	-1.11774	0.152544	2.34812e-13	1.2802e-10
ENSG00000227766.1	HCG4P5	HLA-A	A.02_01_01_01	Yes	conditional on the lead primary and conditional 1 SNP eQTL	0.218377	-1.1577	0.162912	1.19194e-12	5.64018e-10
ENSG00000176998.3	HCG4	HLA-A	A.02_01_01_01	Yes	primary	0.218377	1.03026	0.148026	3.40306e-12	1.47999e-09
ENSG00000204632.7	HLA-G	HLA-A	A.02_01_01_01	Yes	primary	0.218377	0.932363	0.151866	8.28364e-10	2.46342e-07
ENSG00000176998.3	HCG4	HLA-A	A.02_01_01_01	Yes	conditional on the lead primary SNP eQTL	0.218377	0.837502	0.140794	2.70703e-09	7.35275e-07
ENSG00000239257.1	RPL23AP1	HLA-A	A.02_01_01_01	Yes	primary	0.218377	-0.851258	0.1538	3.11494e-08	6.65801e-06
ENSG00000234127.4	TRIM26	HLA-A	A.02_01_01_01	Yes	primary	0.218377	-0.565018	0.107907	1.63976e-07	2.93744e-05
ENSG00000066379.10	ZNRD1	HLA-A	A.02_01_01_01	Yes	primary	0.218377	0.617072	0.132538	3.22684e-06	0.000394766
ENSG00000206341.6	HLA-H	HLA-A	A.02_01_01_01	Yes	primary	0.218377	-0.744967	0.172669	1.6003e-05	0.00160967
ENSG00000206341.6	HLA-H	HLA-A	A.02_01_01_01	Yes	conditional on the lead primary, conditional 1 and conditional 2 SNP eQTL	0.218377	-0.6983	0.172781	5.31017e-05	0.00435688
ENSG00000272221.1	XXbac-BPG181B23.7	HLA-A	A.02_01_01_01	Yes	conditional on the lead primary SNP eQTL	0.218377	0.605055	0.151538	6.53055e-05	0.00511818
ENSG00000272221.1	XXbac-BPG181B23.7	HLA-A	A.02_01_01_01	Yes	conditional on the lead primary and conditional 1 SNP eQTL	0.218377	0.589382	0.148637	7.33215e-05	0.00561592
ENSG00000243753.1	HLA-L	HLA-A	A.02_01_01_01	Yes	primary	0.218377	0.576355	0.147316	9.13942e-05	0.00674181
ENSG00000066379.10	ZNRD1	HLA-A	A.02_01_01_01	Yes	conditional on the lead primary SNP eQTL	0.218377	0.463204	0.129552	0.000349658	0.0190084
ENSG00000223865.6	HLA-DPB1	HLA-A	A.02_01_01_01	Yes	primary	0.218377	0.434885	0.134721	0.00124644	0.0477492
ENSG00000272221.1	XXbac-BPG181B23.7	HLA-A	A.02_01_01_01	Yes	primary	0.218377	0.527771	0.166942	0.00157011	0.0556284
ENSG00000241404.2	EGFL8	HLA-A	A.02_01_01_01	Yes	primary	0.218377	0.433828	0.139189	0.00182806	0.0613742
ENSG00000241404.2	EGFL8	HLA-A	A.02_01_01_01	Yes	conditional on the lead primary and conditional 1 SNP eQTL	0.218377	0.41263	0.135077	0.00225225	0.0708386
ENSG00000241404.2	EGFL8	HLA-A	A.02_01_01_01	Yes	conditional on the lead primary SNP eQTL	0.218377	0.411586	0.134892	0.00227906	0.0713277
ENSG00000206341.6	HLA-H	HLA-A	A.02_01_01_01	Yes	conditional on the lead primary and conditional 1 SNP eQTL	0.218377	-0.442521	0.145238	0.0023124	0.0720118
ENSG00000206341.6	HLA-H	HLA-A	A.02_01_01_01	Yes	conditional on the lead primary SNP eQTL	0.218377	-0.439459	0.145089	0.0024545	0.0748263
ENSG00000223865.6	HLA-DPB1	HLA-A	A.02_01_01_01	Yes	conditional on the lead primary SNP eQTL	0.218377	0.380726	0.126557	0.00262677	0.0779003
ENSG00000204540.6	PSORS1C1	HLA-A	A.02_01_01_01	Yes	primary	0.218377	-0.485119	0.162723	0.00287063	0.0823756
ENSG00000204304.7	PBX2	HLA-A	A.02_01_01_01	Yes	conditional on the lead primary SNP eQTL	0.218377	0.466522	0.160242	0.00359869	0.0953374
ENSG00000214922.5	HLA-F-AS1	HLA-A	A.02_01_01_01	Yes	conditional on the lead primary, conditional 1 and conditional 2 SNP eQTL	0.218377	0.420286	0.146146	0.00403013	0.102404
ENSG00000234127.4	TRIM26	HLA-A	A.02_01_01_01	Yes	conditional on the lead primary SNP eQTL	0.218377	-0.302318	0.110989	0.00645263	0.136679
ENSG00000230795.2	HLA-K	HLA-A	A.02_01_01_01	Yes	conditional on the lead primary and conditional 1 SNP eQTL	0.218377	-0.533219	0.200465	0.00781612	0.151956
ENSG00000214922.5	HLA-F-AS1	HLA-A	A.02_01_01_01	Yes	conditional on the lead primary and conditional 1 SNP eQTL	0.218377	0.386239	0.146072	0.0081892	0.156024
ENSG00000254870.1	ATP6V1G2-DDX39B	HLA-A	A.02_01_01_01	Yes	primary	0.218377	-0.3088	0.11696	0.00828553	0.156906
ENSG00000204642.9	HLA-F	HLA-A	A.02_01_01_01	Yes	primary	0.218377	-0.395099	0.150016	0.00844553	0.158768
ENSG00000137331.11	IER3	HLA-A	A.02_01_01_01	Yes	primary	0.218377	-0.262846	0.104545	0.0119304	0.193516
ENSG00000243753.1	HLA-L	HLA-A	A.02_01_01_01	Yes	conditional on the lead primary, conditional 1 and conditional 2 SNP eQTL	0.218377	0.373874	0.150411	0.0129304	0.202806
ENSG00000204315.3	FKBPL	HLA-A	A.02_01_01_01	Yes	conditional on the lead primary and conditional 1 SNP eQTL	0.218377	-0.315462	0.129508	0.0148566	0.219173
ENSG00000223865.6	HLA-DPB1	HLA-A	A.02_01_01_01	Yes	conditional on the lead primary, conditional 1 and conditional 2 SNP eQTL	0.218377	0.316916	0.131208	0.0157192	0.226085
ENSG00000204304.7	PBX2	HLA-A	A.02_01_01_01	Yes	primary	0.218377	0.295937	0.123428	0.016501	0.23205
ENSG00000223865.6	HLA-DPB1	HLA-A	A.02_01_01_01	Yes	conditional on the lead primary and conditional 1 SNP eQTL	0.218377	0.299455	0.126081	0.0175444	0.240047
ENSG00000204469.8	PRRC2A	HLA-A	A.02_01_01_01	Yes	primary	0.218377	0.284403	0.122408	0.0201579	0.2558
ENSG00000228415.2	PTMAP1	HLA-A	A.02_01_01_01	Yes	primary	0.218377	0.338561	0.146541	0.0208685	0.26008
ENSG00000240053.8	LY6G5B	HLA-A	A.02_01_01_01	Yes	primary	0.218377	0.241961	0.104871	0.0210421	0.261163
ENSG00000204525.10	HLA-C	HLA-A	A.02_01_01_01	Yes	conditional on the lead primary SNP eQTL	0.218377	0.314367	0.138471	0.023191	0.274234
ENSG00000228727.4	SAPCD1	HLA-A	A.02_01_01_01	Yes	primary	0.218377	0.253871	0.112401	0.0239065	0.278248
ENSG00000168394.9	TAP1	HLA-A	A.02_01_01_01	Yes	conditional on the lead primary SNP eQTL	0.218377	-0.324637	0.143957	0.0241269	0.279744
ENSG00000204315.3	FKBPL	HLA-A	A.02_01_01_01	Yes	conditional on the lead primary, conditional 1 and conditional 2 SNP eQTL	0.218377	-0.280548	0.126304	0.0263365	0.290405
ENSG00000200816.1	SNORA38	HLA-A	A.02_01_01_01	Yes	primary	0.218377	0.285356	0.128762	0.0266806	0.291603
ENSG00000204525.10	HLA-C	HLA-A	A.02_01_01_01	Yes	conditional on the lead primary and conditional 1 SNP eQTL	0.218377	0.303441	0.138187	0.0281007	0.299048
ENSG00000168394.9	TAP1	HLA-A	A.02_01_01_01	Yes	primary	0.218377	-0.321752	0.148288	0.0300242	0.308092
ENSG00000241106.2	HLA-DOB	HLA-A	A.02_01_01_01	Yes	primary	0.218377	0.332382	0.1545	0.0314495	0.315774
ENSG00000228415.2	PTMAP1	HLA-A	A.02_01_01_01	Yes	conditional on the lead primary SNP eQTL	0.218377	0.298294	0.140474	0.0337137	0.32633
ENSG00000204305.9	AGER	HLA-A	A.02_01_01_01	Yes	primary	0.218377	0.258666	0.122219	0.03431	0.328658
ENSG00000243753.1	HLA-L	HLA-A	A.02_01_01_01	Yes	conditional on the lead primary SNP eQTL	0.218377	0.311846	0.148268	0.0354432	0.333585
ENSG00000204516.5	MICB	HLA-A	A.02_01_01_01	Yes	primary	0.218377	0.262792	0.127889	0.0398944	0.350406
ENSG00000204371.7	EHMT2	HLA-A	A.02_01_01_01	Yes	conditional on the lead primary SNP eQTL	0.218377	0.224816	0.109408	0.0398944	0.350406
ENSG00000204371.7	EHMT2	HLA-A	A.02_01_01_01	Yes	conditional on the lead primary, conditional 1 and conditional 2 SNP eQTL	0.218377	0.224627	0.109635	0.0404747	0.353
ENSG00000204410.10	MSH5	HLA-A	A.02_01_01_01	Yes	primary	0.218377	0.244021	0.121811	0.0451482	0.368343
ENSG00000213654.5	GPSM3	HLA-A	A.02_01_01_01	Yes	primary	0.218377	0.242512	0.121706	0.0463041	0.372482
ENSG00000204435.9	CSNK2B	HLA-A	A.02_01_01_01	Yes	primary	0.218377	0.250862	0.125958	0.0464114	0.372844
ENSG00000204599.10	TRIM39	HLA-A	A.02_01_01_01	Yes	primary	0.218377	-0.193446	0.0973003	0.0467964	0.374365
ENSG00000168394.9	TAP1	HLA-A	A.02_01_01_01	Yes	conditional on the lead primary and conditional 1 SNP eQTL	0.218377	-0.289445	0.145826	0.0471593	0.375747
ENSG00000213722.4	DDAH2	HLA-A	A.02_01_01_01	Yes	primary	0.218377	-0.201908	0.10263	0.0491443	0.383731
ENSG00000204644.5	ZFP57	HLA-A	A.02_01_01_01	Yes	primary	0.218377	-0.296136	0.150628	0.0492975	0.384238
ENSG00000204463.8	BAG6	HLA-A	A.02_01_01_01	Yes	primary	0.218377	0.257639	0.131423	0.0499508	0.386288
ENSG00000240053.8	LY6G5B	HLA-A	A.02_01_01_01	Yes	conditional on the lead primary SNP eQTL	0.218377	0.194804	0.101221	0.0542868	0.400694
ENSG00000254870.1	ATP6V1G2-DDX39B	HLA-A	A.02_01_01_01	Yes	conditional on the lead primary, conditional 1 and conditional 2 SNP eQTL	0.218377	-0.232625	0.123515	0.0596496	0.415317
ENSG00000213719.4	CLIC1	HLA-A	A.02_01_01_01	Yes	primary	0.218377	0.194829	0.10669	0.0678315	0.437352
ENSG00000166278.10	C2	HLA-A	A.02_01_01_01	Yes	primary	0.218377	0.261518	0.145716	0.0726991	0.450815
ENSG00000206337.6	HCP5	HLA-A	A.02_01_01_01	Yes	primary	0.218377	0.249736	0.142802	0.080321	0.469986
ENSG00000263756.1	XXbac-BPG181M17.6	HLA-A	A.02_01_01_01	Yes	primary	0.218377	0.292478	0.168238	0.0821264	0.474478
ENSG00000204392.6	LSM2	HLA-A	A.02_01_01_01	Yes	primary	0.218377	0.228718	0.132141	0.0834759	0.477428
ENSG00000237923.1	XXbac-BPG27H4.8	HLA-A	A.02_01_01_01	Yes	primary	0.218377	-0.203046	0.118387	0.0863264	0.484667
ENSG00000204520.8	MICA	HLA-A	A.02_01_01_01	Yes	conditional on the lead primary, conditional 1 and conditional 2 SNP eQTL	0.218377	0.255717	0.14961	0.087409	0.487267
ENSG00000204576.7	PRR3	HLA-A	A.02_01_01_01	Yes	primary	0.218377	0.201401	0.119324	0.0914394	0.495846
ENSG00000204568.7	MRPS18B	HLA-A	A.02_01_01_01	Yes	primary	0.218377	0.226282	0.134679	0.0929272	0.498375
ENSG00000224389.4	C4B	HLA-A	A.02_01_01_01	Yes	conditional on the lead primary SNP eQTL	0.218377	0.242453	0.144581	0.093555	0.499673
ENSG00000204348.5	DXO	HLA-A	A.02_01_01_01	Yes	primary	0.218377	0.22228	0.137262	0.105366	0.523855
ENSG00000204348.5	DXO	HLA-A	A.02_01_01_01	Yes	conditional on the lead primary SNP eQTL	0.218377	0.201997	0.124755	0.105415	0.523915
ENSG00000224389.4	C4B	HLA-A	A.02_01_01_01	Yes	primary	0.218377	0.239995	0.150315	0.110353	0.531068
ENSG00000250535.1	STK19P	HLA-A	A.02_01_01_01	Yes	primary	0.218377	0.238618	0.153272	0.119511	0.545962
ENSG00000204619.3	PPP1R11	HLA-A	A.02_01_01_01	Yes	primary	0.218377	0.220974	0.143559	0.123742	0.552971
ENSG00000204618.4	RNF39	HLA-A	A.02_01_01_01	Yes	primary	0.218377	0.238236	0.155284	0.124982	0.555084
ENSG00000198502.5	HLA-DRB5	HLA-A	A.02_01_01_01	Yes	primary	0.218377	-0.25664	0.167295	0.125016	0.555153
ENSG00000204371.7	EHMT2	HLA-A	A.02_01_01_01	Yes	primary	0.218377	0.176644	0.115914	0.127529	0.559543
ENSG00000204385.6	SLC44A4	HLA-A	A.02_01_01_01	Yes	primary	0.218377	0.195769	0.128949	0.128966	0.561739
ENSG00000237669.1	HCG4P3	HLA-A	A.02_01_01_01	Yes	conditional on the lead primary and conditional 1 SNP eQTL	0.218377	-0.250726	0.165184	0.12905	0.561739
ENSG00000168477.13	TNXB	HLA-A	A.02_01_01_01	Yes	primary	0.218377	0.20084	0.133359	0.132065	0.565528
ENSG00000204520.8	MICA	HLA-A	A.02_01_01_01	Yes	primary	0.218377	0.230146	0.153107	0.132795	0.566005
ENSG00000204644.5	ZFP57	HLA-A	A.02_01_01_01	Yes	conditional on the lead primary and conditional 1 SNP eQTL	0.218377	-0.225047	0.149784	0.132974	0.566031
ENSG00000196126.6	HLA-DRB1	HLA-A	A.02_01_01_01	Yes	primary	0.218377	-0.25141	0.173318	0.146899	0.587455
ENSG00000244355.3	LY6G6D	HLA-A	A.02_01_01_01	Yes	primary	0.218377	-0.220018	0.152198	0.148288	0.589233
ENSG00000204256.8	BRD2	HLA-A	A.02_01_01_01	Yes	primary	0.218377	0.1743	0.120574	0.148292	0.589233
ENSG00000230313.1	HCG24	HLA-A	A.02_01_01_01	Yes	conditional on the lead primary SNP eQTL	0.218377	0.201173	0.144807	0.164756	0.610641
ENSG00000254870.1	ATP6V1G2-DDX39B	HLA-A	A.02_01_01_01	Yes	conditional on the lead primary and conditional 1 SNP eQTL	0.218377	-0.17404	0.125783	0.166466	0.612567
ENSG00000237042.1	MICG	HLA-A	A.02_01_01_01	Yes	primary	0.218377	0.156967	0.113684	0.167363	0.613593
ENSG00000227939.1	RPL3P2	HLA-A	A.02_01_01_01	Yes	primary	0.218377	0.192696	0.140867	0.171334	0.619067
ENSG00000204444.6	APOM	HLA-A	A.02_01_01_01	Yes	conditional on the lead primary, conditional 1 and conditional 2 SNP eQTL	0.218377	0.230805	0.171996	0.179623	0.630309
ENSG00000204389.8	HSPA1A	HLA-A	A.02_01_01_01	Yes	primary	0.218377	0.183667	0.137234	0.180781	0.632308
ENSG00000204444.6	APOM	HLA-A	A.02_01_01_01	Yes	primary	0.218377	0.161548	0.121959	0.185301	0.637769
ENSG00000206344.6	HCG27	HLA-A	A.02_01_01_01	Yes	primary	0.218377	0.206271	0.158124	0.192066	0.645419
ENSG00000270604.1	HCG17	HLA-A	A.02_01_01_01	Yes	conditional on the lead primary SNP eQTL	0.218377	-0.295576	0.226597	0.192094	0.645419
ENSG00000204569.5	PPP1R10	HLA-A	A.02_01_01_01	Yes	primary	0.218377	-0.204562	0.156923	0.192378	0.645529
ENSG00000204385.6	SLC44A4	HLA-A	A.02_01_01_01	Yes	conditional on the lead primary and conditional 1 SNP eQTL	0.218377	0.158984	0.121988	0.19248	0.645561
ENSG00000204580.7	DDR1	HLA-A	A.02_01_01_01	Yes	primary	0.218377	-0.130317	0.103143	0.206421	0.660832
ENSG00000204498.6	NFKBIL1	HLA-A	A.02_01_01_01	Yes	primary	0.218377	-0.145934	0.115586	0.206748	0.661322
ENSG00000224557.3	HLA-DPB2	HLA-A	A.02_01_01_01	Yes	primary	0.218377	0.202086	0.160585	0.208233	0.662945
ENSG00000204256.8	BRD2	HLA-A	A.02_01_01_01	Yes	conditional on the lead primary SNP eQTL	0.218377	0.143135	0.114981	0.213185	0.667296
ENSG00000204520.8	MICA	HLA-A	A.02_01_01_01	Yes	conditional on the lead primary and conditional 1 SNP eQTL	0.218377	0.181903	0.14628	0.213673	0.667763
ENSG00000204421.2	LY6G6C	HLA-A	A.02_01_01_01	Yes	primary	0.218377	0.196166	0.158173	0.214904	0.668749
ENSG00000204525.10	HLA-C	HLA-A	A.02_01_01_01	Yes	primary	0.218377	0.186114	0.15069	0.216803	0.671341
ENSG00000204385.6	SLC44A4	HLA-A	A.02_01_01_01	Yes	conditional on the lead primary SNP eQTL	0.218377	0.149871	0.121663	0.218001	0.672287
ENSG00000204439.3	C6orf47	HLA-A	A.02_01_01_01	Yes	primary	0.218377	-0.150639	0.124151	0.224996	0.678978
ENSG00000231074.4	HCG18	HLA-A	A.02_01_01_01	Yes	primary	0.218377	-0.120386	0.0992222	0.225016	0.678978
ENSG00000272540.1	XXbac-BPG252P9.9	HLA-A	A.02_01_01_01	Yes	primary	0.218377	0.202629	0.16938	0.231582	0.684131
ENSG00000235781.1	XXbac-BPG249D20.9	HLA-A	A.02_01_01_01	Yes	primary	0.218377	0.190697	0.163744	0.244179	0.696586
ENSG00000204315.3	FKBPL	HLA-A	A.02_01_01_01	Yes	conditional on the lead primary SNP eQTL	0.218377	-0.1444	0.124608	0.246522	0.698547
ENSG00000204590.8	GNL1	HLA-A	A.02_01_01_01	Yes	primary	0.218377	-0.125281	0.108123	0.246585	0.698624
ENSG00000204387.8	C6orf48	HLA-A	A.02_01_01_01	Yes	primary	0.218377	0.127209	0.110246	0.248553	0.700315
ENSG00000204389.8	HSPA1A	HLA-A	A.02_01_01_01	Yes	conditional on the lead primary, conditional 1 and conditional 2 SNP eQTL	0.218377	0.163525	0.142117	0.249881	0.70154
ENSG00000204257.10	HLA-DMA	HLA-A	A.02_01_01_01	Yes	primary	0.218377	0.178284	0.156672	0.255145	0.706588
ENSG00000231074.4	HCG18	HLA-A	A.02_01_01_01	Yes	conditional on the lead primary, conditional 1 and conditional 2 SNP eQTL	0.218377	-0.10792	0.0960596	0.261238	0.712535
ENSG00000137411.12	VARS2	HLA-A	A.02_01_01_01	Yes	primary	0.218377	0.136244	0.124524	0.273903	0.722218
ENSG00000237669.1	HCG4P3	HLA-A	A.02_01_01_01	Yes	primary	0.218377	0.179638	0.169355	0.288816	0.734741
ENSG00000204394.8	VARS	HLA-A	A.02_01_01_01	Yes	primary	0.218377	0.130299	0.123074	0.289734	0.735742
ENSG00000204356.7	NELFE	HLA-A	A.02_01_01_01	Yes	primary	0.218377	0.142786	0.136458	0.295389	0.740742
ENSG00000219797.2	PPIAP9	HLA-A	A.02_01_01_01	Yes	conditional on the lead primary SNP eQTL	0.218377	0.16157	0.154451	0.295519	0.740821
ENSG00000204388.5	HSPA1B	HLA-A	A.02_01_01_01	Yes	primary	0.218377	0.143958	0.138918	0.300071	0.744353
ENSG00000230313.1	HCG24	HLA-A	A.02_01_01_01	Yes	conditional on the lead primary and conditional 1 SNP eQTL	0.218377	0.234689	0.227298	0.301832	0.745105
ENSG00000234745.5	HLA-B	HLA-A	A.02_01_01_01	Yes	primary	0.218377	-0.158431	0.15518	0.307279	0.748141
ENSG00000204257.10	HLA-DMA	HLA-A	A.02_01_01_01	Yes	conditional on the lead primary SNP eQTL	0.218377	0.179488	0.177042	0.310671	0.750352
ENSG00000137310.7	TCF19	HLA-A	A.02_01_01_01	Yes	primary	0.218377	-0.126185	0.124514	0.310858	0.750661
ENSG00000241106.2	HLA-DOB	HLA-A	A.02_01_01_01	Yes	conditional on the lead primary and conditional 1 SNP eQTL	0.218377	0.208704	0.211738	0.324294	0.760848
ENSG00000179344.12	HLA-DQB1	HLA-A	A.02_01_01_01	Yes	conditional on the lead primary SNP eQTL	0.218377	-0.142499	0.144906	0.325417	0.761622
ENSG00000204642.9	HLA-F	HLA-A	A.02_01_01_01	Yes	conditional on the lead primary SNP eQTL	0.218377	-0.140421	0.147596	0.341406	0.772165
ENSG00000263020.1	CSNK2B-LY6G5B-1181	HLA-A	A.02_01_01_01	Yes	primary	0.218377	0.136887	0.143934	0.341582	0.772419
ENSG00000204344.10	STK19	HLA-A	A.02_01_01_01	Yes	primary	0.218377	-0.124796	0.131526	0.34271	0.773231
ENSG00000204475.5	NCR3	HLA-A	A.02_01_01_01	Yes	primary	0.218377	0.140848	0.14857	0.34312	0.773392
ENSG00000204301.5	NOTCH4	HLA-A	A.02_01_01_01	Yes	primary	0.218377	-0.131242	0.14049	0.350214	0.777981
ENSG00000214922.5	HLA-F-AS1	HLA-A	A.02_01_01_01	Yes	conditional on the lead primary SNP eQTL	0.218377	0.124775	0.134819	0.354708	0.781098
ENSG00000241106.2	HLA-DOB	HLA-A	A.02_01_01_01	Yes	conditional on the lead primary SNP eQTL	0.218377	0.129702	0.143549	0.366238	0.78885
ENSG00000204287.9	HLA-DRA	HLA-A	A.02_01_01_01	Yes	conditional on the lead primary SNP eQTL	0.218377	-0.133063	0.149453	0.373288	0.792716
ENSG00000221988.8	PPT2	HLA-A	A.02_01_01_01	Yes	primary	0.218377	0.11575	0.130009	0.373294	0.792716
ENSG00000196735.7	HLA-DQA1	HLA-A	A.02_01_01_01	Yes	primary	0.218377	-0.150532	0.170872	0.378337	0.795815
ENSG00000204351.7	SKIV2L	HLA-A	A.02_01_01_01	Yes	primary	0.218377	0.12739	0.147734	0.388526	0.802674
ENSG00000204520.8	MICA	HLA-A	A.02_01_01_01	Yes	conditional on the lead primary SNP eQTL	0.218377	0.120016	0.139748	0.390448	0.803857
ENSG00000213676.6	ATF6B	HLA-A	A.02_01_01_01	Yes	primary	0.218377	-0.109508	0.128785	0.39515	0.807166
ENSG00000204623.4	ZNRD1-AS1	HLA-A	A.02_01_01_01	Yes	primary	0.218377	0.116724	0.137283	0.395191	0.807169
ENSG00000204444.6	APOM	HLA-A	A.02_01_01_01	Yes	conditional on the lead primary SNP eQTL	0.218377	0.148553	0.175181	0.396439	0.80807
ENSG00000227507.2	LTB	HLA-A	A.02_01_01_01	Yes	conditional on the lead primary, conditional 1 and conditional 2 SNP eQTL	0.218377	-0.145309	0.172168	0.398674	0.808993
ENSG00000204574.8	ABCF1	HLA-A	A.02_01_01_01	Yes	primary	0.218377	0.0881337	0.104873	0.400692	0.810149
ENSG00000227507.2	LTB	HLA-A	A.02_01_01_01	Yes	conditional on the lead primary and conditional 1 SNP eQTL	0.218377	-0.141671	0.169482	0.403208	0.811648
ENSG00000255152.4	MSH5-SAPCD1	HLA-A	A.02_01_01_01	Yes	primary	0.218377	0.120203	0.146038	0.410454	0.81597
ENSG00000204644.5	ZFP57	HLA-A	A.02_01_01_01	Yes	conditional on the lead primary SNP eQTL	0.218377	-0.117278	0.142614	0.410881	0.816208
ENSG00000168477.13	TNXB	HLA-A	A.02_01_01_01	Yes	conditional on the lead primary SNP eQTL	0.218377	0.171838	0.209703	0.412538	0.817448
ENSG00000168477.13	TNXB	HLA-A	A.02_01_01_01	Yes	conditional on the lead primary, conditional 1 and conditional 2 SNP eQTL	0.218377	0.172476	0.210898	0.413462	0.817928
ENSG00000204576.7	PRR3	HLA-A	A.02_01_01_01	Yes	conditional on the lead primary, conditional 1 and conditional 2 SNP eQTL	0.218377	-0.100445	0.123285	0.415224	0.819124
ENSG00000230313.1	HCG24	HLA-A	A.02_01_01_01	Yes	primary	0.218377	0.12959	0.159116	0.415395	0.81915
ENSG00000204574.8	ABCF1	HLA-A	A.02_01_01_01	Yes	conditional on the lead primary SNP eQTL	0.218377	0.114922	0.142896	0.421263	0.821637
ENSG00000237669.1	HCG4P3	HLA-A	A.02_01_01_01	Yes	conditional on the lead primary, conditional 1 and conditional 2 SNP eQTL	0.218377	-0.121651	0.155727	0.434696	0.829277
ENSG00000234745.5	HLA-B	HLA-A	A.02_01_01_01	Yes	conditional on the lead primary SNP eQTL	0.218377	-0.113645	0.146873	0.439069	0.832024
ENSG00000179344.12	HLA-DQB1	HLA-A	A.02_01_01_01	Yes	primary	0.218377	-0.122173	0.160305	0.445984	0.835859
ENSG00000204463.8	BAG6	HLA-A	A.02_01_01_01	Yes	conditional on the lead primary SNP eQTL	0.218377	-0.100815	0.136493	0.460143	0.841953
ENSG00000237669.1	HCG4P3	HLA-A	A.02_01_01_01	Yes	conditional on the lead primary SNP eQTL	0.218377	-0.112614	0.155589	0.469191	0.846295
ENSG00000204287.9	HLA-DRA	HLA-A	A.02_01_01_01	Yes	primary	0.218377	-0.123036	0.171198	0.47234	0.847674
ENSG00000204261.4	TAPSAR1	HLA-A	A.02_01_01_01	Yes	primary	0.218377	-0.111958	0.15666	0.474822	0.84849
ENSG00000204308.6	RNF5	HLA-A	A.02_01_01_01	Yes	conditional on the lead primary SNP eQTL	0.218377	-0.0983792	0.137965	0.4758	0.848984
ENSG00000213676.6	ATF6B	HLA-A	A.02_01_01_01	Yes	conditional on the lead primary and conditional 1 SNP eQTL	0.218377	-0.138798	0.19599	0.478827	0.850449
ENSG00000198563.9	DDX39B	HLA-A	A.02_01_01_01	Yes	conditional on the lead primary and conditional 1 SNP eQTL	0.218377	8.92868e-18	1.26631e-17	0.48075	0.851533
ENSG00000231074.4	HCG18	HLA-A	A.02_01_01_01	Yes	conditional on the lead primary SNP eQTL	0.218377	-0.0659527	0.0950472	0.487749	0.854835
ENSG00000204463.8	BAG6	HLA-A	A.02_01_01_01	Yes	conditional on the lead primary and conditional 1 SNP eQTL	0.218377	0.097495	0.14075	0.48851	0.855153
ENSG00000230795.2	HLA-K	HLA-A	A.02_01_01_01	Yes	conditional on the lead primary SNP eQTL	0.218377	-0.104031	0.152136	0.4941	0.857563
ENSG00000234745.5	HLA-B	HLA-A	A.02_01_01_01	Yes	conditional on the lead primary and conditional 1 SNP eQTL	0.218377	-0.0976021	0.143223	0.495575	0.858271
ENSG00000213719.4	CLIC1	HLA-A	A.02_01_01_01	Yes	conditional on the lead primary SNP eQTL	0.218377	-0.0756926	0.111781	0.49831	0.859668
ENSG00000224557.3	HLA-DPB2	HLA-A	A.02_01_01_01	Yes	conditional on the lead primary SNP eQTL	0.218377	0.0921072	0.137029	0.501474	0.861008
ENSG00000224557.3	HLA-DPB2	HLA-A	A.02_01_01_01	Yes	conditional on the lead primary and conditional 1 SNP eQTL	0.218377	0.0922145	0.137322	0.501889	0.861163
ENSG00000219797.2	PPIAP9	HLA-A	A.02_01_01_01	Yes	primary	0.218377	0.107328	0.162486	0.50891	0.864504
ENSG00000137310.7	TCF19	HLA-A	A.02_01_01_01	Yes	conditional on the lead primary SNP eQTL	0.218377	-0.0776448	0.118768	0.513272	0.866179
ENSG00000240065.3	PSMB9	HLA-A	A.02_01_01_01	Yes	primary	0.218377	-0.0865784	0.132498	0.513477	0.866249
ENSG00000254870.1	ATP6V1G2-DDX39B	HLA-A	A.02_01_01_01	Yes	conditional on the lead primary SNP eQTL	0.218377	-0.0767169	0.118161	0.516171	0.867858
ENSG00000224328.1	MDC1-AS1	HLA-A	A.02_01_01_01	Yes	primary	0.218377	0.106466	0.169207	0.529215	0.873086
ENSG00000204531.11	POU5F1	HLA-A	A.02_01_01_01	Yes	primary	0.218377	-0.0484491	0.079133	0.540373	0.877885
ENSG00000196230.8	TUBB	HLA-A	A.02_01_01_01	Yes	primary	0.218377	0.0482658	0.0788337	0.540373	0.877885
ENSG00000137312.10	FLOT1	HLA-A	A.02_01_01_01	Yes	primary	0.218377	-0.0788626	0.128877	0.54059	0.877994
ENSG00000204576.7	PRR3	HLA-A	A.02_01_01_01	Yes	conditional on the lead primary SNP eQTL	0.218377	-0.0899757	0.149019	0.545985	0.880835
ENSG00000137337.10	MDC1	HLA-A	A.02_01_01_01	Yes	primary	0.218377	0.0788457	0.134531	0.557823	0.886901
ENSG00000204438.6	GPANK1	HLA-A	A.02_01_01_01	Yes	conditional on the lead primary SNP eQTL	0.218377	0.0745382	0.132115	0.572623	0.892079
ENSG00000204538.3	PSORS1C2	HLA-A	A.02_01_01_01	Yes	conditional on the lead primary SNP eQTL	0.218377	0.0780104	0.13831	0.572736	0.892139
ENSG00000137310.7	TCF19	HLA-A	A.02_01_01_01	Yes	conditional on the lead primary and conditional 1 SNP eQTL	0.218377	-0.0660439	0.118913	0.578624	0.89489
ENSG00000230795.2	HLA-K	HLA-A	A.02_01_01_01	Yes	primary	0.218377	0.0924593	0.167027	0.579881	0.895102
ENSG00000204564.7	C6orf136	HLA-A	A.02_01_01_01	Yes	primary	0.218377	0.0842098	0.153275	0.58273	0.896234
ENSG00000228962.1	HCG23	HLA-A	A.02_01_01_01	Yes	primary	0.218377	-0.0813571	0.159865	0.610814	0.907476
ENSG00000204427.7	ABHD16A	HLA-A	A.02_01_01_01	Yes	primary	0.218377	-0.0640821	0.127618	0.615569	0.909663
ENSG00000204308.6	RNF5	HLA-A	A.02_01_01_01	Yes	conditional on the lead primary and conditional 1 SNP eQTL	0.218377	-0.0629238	0.138203	0.648895	0.921213
ENSG00000204644.5	ZFP57	HLA-A	A.02_01_01_01	Yes	conditional on the lead primary, conditional 1 and conditional 2 SNP eQTL	0.218377	-0.103451	0.230955	0.654205	0.923022
ENSG00000213676.6	ATF6B	HLA-A	A.02_01_01_01	Yes	conditional on the lead primary SNP eQTL	0.218377	-0.0757844	0.171296	0.658187	0.924529
ENSG00000204439.3	C6orf47	HLA-A	A.02_01_01_01	Yes	conditional on the lead primary SNP eQTL	0.218377	-0.0523755	0.121851	0.667317	0.927
ENSG00000204592.5	HLA-E	HLA-A	A.02_01_01_01	Yes	primary	0.218377	0.0576954	0.138366	0.676695	0.928749
ENSG00000242574.4	HLA-DMB	HLA-A	A.02_01_01_01	Yes	conditional on the lead primary SNP eQTL	0.218377	0.0595844	0.146818	0.684862	0.931652
ENSG00000204438.6	GPANK1	HLA-A	A.02_01_01_01	Yes	primary	0.218377	0.0567454	0.140745	0.686816	0.932099
ENSG00000258388.3	PPT2-EGFL8	HLA-A	A.02_01_01_01	Yes	primary	0.218377	0.0636611	0.161106	0.692732	0.933771
ENSG00000204257.10	HLA-DMA	HLA-A	A.02_01_01_01	Yes	conditional on the lead primary and conditional 1 SNP eQTL	0.218377	0.0736229	0.187393	0.694409	0.934274
ENSG00000204538.3	PSORS1C2	HLA-A	A.02_01_01_01	Yes	primary	0.218377	-0.0588074	0.152372	0.699536	0.936041
ENSG00000204396.6	VWA7	HLA-A	A.02_01_01_01	Yes	primary	0.218377	-0.0614868	0.161235	0.702944	0.937324
ENSG00000204472.8	AIF1	HLA-A	A.02_01_01_01	Yes	conditional on the lead primary SNP eQTL	0.218377	-0.0499995	0.132443	0.705789	0.937836
ENSG00000204536.9	CCHCR1	HLA-A	A.02_01_01_01	Yes	conditional on the lead primary SNP eQTL	0.218377	0.0518091	0.140894	0.713084	0.940096
ENSG00000204472.8	AIF1	HLA-A	A.02_01_01_01	Yes	primary	0.218377	-0.0471067	0.131678	0.720537	0.942469
ENSG00000236603.1	RANP1	HLA-A	A.02_01_01_01	Yes	conditional on the lead primary SNP eQTL	0.218377	-0.0286082	0.0813663	0.72514	0.943744
ENSG00000213760.6	ATP6V1G2	HLA-A	A.02_01_01_01	Yes	primary	0.218377	-0.0546846	0.159856	0.732285	0.945601
ENSG00000228962.1	HCG23	HLA-A	A.02_01_01_01	Yes	conditional on the lead primary SNP eQTL	0.218377	-0.047069	0.14124	0.738942	0.948051
ENSG00000227507.2	LTB	HLA-A	A.02_01_01_01	Yes	primary	0.218377	-0.0376786	0.114213	0.741478	0.948968
ENSG00000242574.4	HLA-DMB	HLA-A	A.02_01_01_01	Yes	conditional on the lead primary, conditional 1 and conditional 2 SNP eQTL	0.218377	0.0494182	0.153122	0.746895	0.949965
ENSG00000204472.8	AIF1	HLA-A	A.02_01_01_01	Yes	conditional on the lead primary, conditional 1 and conditional 2 SNP eQTL	0.218377	-0.0424044	0.132862	0.749603	0.950633
ENSG00000270604.1	HCG17	HLA-A	A.02_01_01_01	Yes	primary	0.218377	-0.0501967	0.157693	0.750242	0.950681
ENSG00000137343.13	ATAT1	HLA-A	A.02_01_01_01	Yes	primary	0.218377	0.0395661	0.125817	0.753162	0.951593
ENSG00000234745.5	HLA-B	HLA-A	A.02_01_01_01	Yes	conditional on the lead primary, conditional 1 and conditional 2 SNP eQTL	0.218377	-0.043182	0.142098	0.761213	0.953324
ENSG00000204310.6	AGPAT1	HLA-A	A.02_01_01_01	Yes	conditional on the lead primary and conditional 1 SNP eQTL	0.218377	0.0376859	0.125341	0.763669	0.953493
ENSG00000229836.1	XXbac-BPG248L24.10	HLA-A	A.02_01_01_01	Yes	conditional on the lead primary SNP eQTL	0.218377	0.0411852	0.137464	0.764476	0.953526
ENSG00000198563.9	DDX39B	HLA-A	A.02_01_01_01	Yes	conditional on the lead primary SNP eQTL	0.218377	0.0110257	0.0368925	0.765047	0.953767
ENSG00000204428.8	LY6G5C	HLA-A	A.02_01_01_01	Yes	primary	0.218377	-0.0439998	0.150235	0.76962	0.954758
ENSG00000204315.3	FKBPL	HLA-A	A.02_01_01_01	Yes	primary	0.218377	-0.0343751	0.124394	0.782287	0.957415
ENSG00000137404.10	NRM	HLA-A	A.02_01_01_01	Yes	primary	0.218377	-0.0351908	0.129506	0.785829	0.958216
ENSG00000214894.2	LINC00243	HLA-A	A.02_01_01_01	Yes	primary	0.218377	0.0434746	0.160298	0.786228	0.958239
ENSG00000204574.8	ABCF1	HLA-A	A.02_01_01_01	Yes	conditional on the lead primary and conditional 1 SNP eQTL	0.218377	0.027514	0.103883	0.791121	0.95965
ENSG00000204428.8	LY6G5C	HLA-A	A.02_01_01_01	Yes	conditional on the lead primary SNP eQTL	0.218377	0.0376078	0.144053	0.794039	0.960438
ENSG00000204252.8	HLA-DOA	HLA-A	A.02_01_01_01	Yes	primary	0.218377	-0.0389574	0.150987	0.796393	0.96069
ENSG00000204592.5	HLA-E	HLA-A	A.02_01_01_01	Yes	conditional on the lead primary SNP eQTL	0.218377	0.0332361	0.131612	0.800631	0.961601
ENSG00000231389.3	HLA-DPA1	HLA-A	A.02_01_01_01	Yes	primary	0.218377	0.0376455	0.153342	0.806069	0.962865
ENSG00000204536.9	CCHCR1	HLA-A	A.02_01_01_01	Yes	primary	0.218377	0.035386	0.155676	0.820186	0.965892
ENSG00000204538.3	PSORS1C2	HLA-A	A.02_01_01_01	Yes	conditional on the lead primary and conditional 1 SNP eQTL	0.218377	-0.0327789	0.146867	0.823389	0.966229
ENSG00000204314.6	PRRT1	HLA-A	A.02_01_01_01	Yes	primary	0.218377	-0.0287047	0.139141	0.836557	0.969907
ENSG00000204438.6	GPANK1	HLA-A	A.02_01_01_01	Yes	conditional on the lead primary, conditional 1 and conditional 2 SNP eQTL	0.218377	0.0257691	0.136981	0.850781	0.972614
ENSG00000204396.6	VWA7	HLA-A	A.02_01_01_01	Yes	conditional on the lead primary SNP eQTL	0.218377	0.0294151	0.157947	0.852262	0.972614
ENSG00000235663.1	SAPCD1-AS1	HLA-A	A.02_01_01_01	Yes	primary	0.218377	0.0306758	0.166063	0.853445	0.972745
ENSG00000204366.3	ZBTB12	HLA-A	A.02_01_01_01	Yes	primary	0.218377	0.0178595	0.0982969	0.855827	0.973043
ENSG00000230622.1	UQCRHP1	HLA-A	A.02_01_01_01	Yes	primary	0.218377	-0.0285156	0.160078	0.858616	0.97346
ENSG00000213780.6	GTF2H4	HLA-A	A.02_01_01_01	Yes	conditional on the lead primary, conditional 1 and conditional 2 SNP eQTL	0.218377	0.0218253	0.124115	0.860414	0.973856
ENSG00000204310.6	AGPAT1	HLA-A	A.02_01_01_01	Yes	conditional on the lead primary, conditional 1 and conditional 2 SNP eQTL	0.218377	0.021849	0.127813	0.864266	0.974407
ENSG00000204389.8	HSPA1A	HLA-A	A.02_01_01_01	Yes	conditional on the lead primary SNP eQTL	0.218377	0.0297944	0.17561	0.865276	0.974715
ENSG00000242574.4	HLA-DMB	HLA-A	A.02_01_01_01	Yes	primary	0.218377	0.0262538	0.155936	0.866298	0.975158
ENSG00000204592.5	HLA-E	HLA-A	A.02_01_01_01	Yes	conditional on the lead primary and conditional 1 SNP eQTL	0.218377	0.0218421	0.131638	0.868216	0.975813
ENSG00000204310.6	AGPAT1	HLA-A	A.02_01_01_01	Yes	primary	0.218377	-0.0215623	0.131841	0.870087	0.976147
ENSG00000204308.6	RNF5	HLA-A	A.02_01_01_01	Yes	primary	0.218377	0.0232408	0.15058	0.87734	0.977799
ENSG00000229836.1	XXbac-BPG248L24.10	HLA-A	A.02_01_01_01	Yes	primary	0.218377	0.0217202	0.141711	0.878184	0.978047
ENSG00000206344.6	HCG27	HLA-A	A.02_01_01_01	Yes	conditional on the lead primary SNP eQTL	0.218377	-0.0234654	0.168424	0.889195	0.980143
ENSG00000204482.6	LST1	HLA-A	A.02_01_01_01	Yes	conditional on the lead primary SNP eQTL	0.218377	0.0210072	0.157083	0.893614	0.980921
ENSG00000204388.5	HSPA1B	HLA-A	A.02_01_01_01	Yes	conditional on the lead primary and conditional 1 SNP eQTL	0.218377	0.02437	0.189643	0.89775	0.981429
ENSG00000204310.6	AGPAT1	HLA-A	A.02_01_01_01	Yes	conditional on the lead primary SNP eQTL	0.218377	-0.0146827	0.119814	0.902467	0.982139
ENSG00000204267.9	TAP2	HLA-A	A.02_01_01_01	Yes	primary	0.218377	0.0173632	0.145179	0.904802	0.982416
ENSG00000204482.6	LST1	HLA-A	A.02_01_01_01	Yes	primary	0.218377	0.0186038	0.164999	0.910228	0.983263
ENSG00000198563.9	DDX39B	HLA-A	A.02_01_01_01	Yes	primary	0.218377	0.00413383	0.0385429	0.914588	0.983765
ENSG00000236603.1	RANP1	HLA-A	A.02_01_01_01	Yes	primary	0.218377	0.00899921	0.0845397	0.915226	0.984013
ENSG00000137312.10	FLOT1	HLA-A	A.02_01_01_01	Yes	conditional on the lead primary SNP eQTL	0.218377	-0.0132315	0.124432	0.915316	0.984031
ENSG00000204599.10	TRIM39	HLA-A	A.02_01_01_01	Yes	conditional on the lead primary SNP eQTL	0.218377	-0.00997132	0.096862	0.918008	0.984285
ENSG00000204560.5	DHX16	HLA-A	A.02_01_01_01	Yes	primary	0.218377	0.0110252	0.120519	0.92711	0.985782
ENSG00000204386.6	NEU1	HLA-A	A.02_01_01_01	Yes	primary	0.218377	-0.0116083	0.130574	0.92916	0.986045
ENSG00000204387.8	C6orf48	HLA-A	A.02_01_01_01	Yes	conditional on the lead primary SNP eQTL	0.218377	-0.0121348	0.138588	0.930226	0.986168
ENSG00000213719.4	CLIC1	HLA-A	A.02_01_01_01	Yes	conditional on the lead primary and conditional 1 SNP eQTL	0.218377	0.0084134	0.11156	0.939884	0.988357
ENSG00000213780.6	GTF2H4	HLA-A	A.02_01_01_01	Yes	primary	0.218377	0.010407	0.141076	0.941194	0.988716
ENSG00000272273.1	XXbac-BPG252P9.10	HLA-A	A.02_01_01_01	Yes	primary	0.218377	-0.0113857	0.156002	0.941819	0.988798
ENSG00000241370.1	RPP21	HLA-A	A.02_01_01_01	Yes	primary	0.218377	0.00906886	0.129648	0.944234	0.989276
ENSG00000213780.6	GTF2H4	HLA-A	A.02_01_01_01	Yes	conditional on the lead primary SNP eQTL	0.218377	-0.00856119	0.123382	0.944681	0.989276
ENSG00000146112.7	PPP1R18	HLA-A	A.02_01_01_01	Yes	primary	0.218377	-0.00558488	0.112632	0.960453	0.992604
ENSG00000214922.5	HLA-F-AS1	HLA-A	A.02_01_01_01	Yes	primary	0.218377	-0.00727237	0.147004	0.960544	0.992627
ENSG00000204264.4	PSMB8	HLA-A	A.02_01_01_01	Yes	primary	0.218377	-0.0051744	0.12242	0.966285	0.993748
ENSG00000204642.9	HLA-F	HLA-A	A.02_01_01_01	Yes	conditional on the lead primary and conditional 1 SNP eQTL	0.218377	0.00557055	0.168797	0.973673	0.995001
ENSG00000204390.8	HSPA1L	HLA-A	A.02_01_01_01	Yes	primary	0.218377	0.00510131	0.154643	0.973684	0.995001
ENSG00000204642.9	HLA-F	HLA-A	A.02_01_01_01	Yes	conditional on the lead primary, conditional 1 and conditional 2 SNP eQTL	0.218377	0.00463581	0.163245	0.977345	0.995963
ENSG00000244731.3	C4A	HLA-A	A.02_01_01_01	Yes	primary	0.218377	0.00276045	0.158941	0.986143	0.997816
ENSG00000223837.2	BRD2-IT1	HLA-A	A.02_01_01_01	Yes	primary	0.218377	0.000592868	0.160372	0.99705	0.999694
ENSG00000204482.6	LST1	HLA-A	A.02_06_01_01	Yes	primary	0.0107399	2.44578	0.679822	0.000321071	0.0177492
ENSG00000204482.6	LST1	HLA-A	A.02_06_01_01	Yes	conditional on the lead primary SNP eQTL	0.0107399	2.24004	0.657966	0.000662873	0.0302262
ENSG00000204644.5	ZFP57	HLA-A	A.02_06_01_01	Yes	conditional on the lead primary SNP eQTL	0.0107399	-1.84838	0.57031	0.00119103	0.0460961
ENSG00000204644.5	ZFP57	HLA-A	A.02_06_01_01	Yes	conditional on the lead primary and conditional 1 SNP eQTL	0.0107399	-1.79541	0.598257	0.00269027	0.0792213
ENSG00000204644.5	ZFP57	HLA-A	A.02_06_01_01	Yes	primary	0.0107399	-1.79665	0.610394	0.00324598	0.0891918
ENSG00000223837.2	BRD2-IT1	HLA-A	A.02_06_01_01	Yes	primary	0.0107399	1.90614	0.692142	0.00588755	0.129464
ENSG00000204560.5	DHX16	HLA-A	A.02_06_01_01	Yes	primary	0.0107399	1.25351	0.515836	0.0150967	0.22109
ENSG00000206337.6	HCP5	HLA-A	A.02_06_01_01	Yes	primary	0.0107399	-1.45949	0.600789	0.0151282	0.2214
ENSG00000204427.7	ABHD16A	HLA-A	A.02_06_01_01	Yes	primary	0.0107399	1.29892	0.55599	0.0194789	0.25108
ENSG00000234127.4	TRIM26	HLA-A	A.02_06_01_01	Yes	conditional on the lead primary SNP eQTL	0.0107399	0.986887	0.447798	0.0275338	0.296407
ENSG00000240065.3	PSMB9	HLA-A	A.02_06_01_01	Yes	primary	0.0107399	1.1538	0.542994	0.0335964	0.325738
ENSG00000146112.7	PPP1R18	HLA-A	A.02_06_01_01	Yes	primary	0.0107399	1.01118	0.480882	0.0354864	0.333671
ENSG00000237669.1	HCG4P3	HLA-A	A.02_06_01_01	Yes	conditional on the lead primary and conditional 1 SNP eQTL	0.0107399	-1.30843	0.62917	0.0375608	0.342312
ENSG00000204344.10	STK19	HLA-A	A.02_06_01_01	Yes	primary	0.0107399	1.16594	0.560658	0.0375625	0.342312
ENSG00000234127.4	TRIM26	HLA-A	A.02_06_01_01	Yes	primary	0.0107399	0.980907	0.474934	0.0388895	0.346724
ENSG00000204644.5	ZFP57	HLA-A	A.02_06_01_01	Yes	conditional on the lead primary, conditional 1 and conditional 2 SNP eQTL	0.0107399	-1.3032	0.634938	0.0401226	0.351528
ENSG00000204580.7	DDR1	HLA-A	A.02_06_01_01	Yes	primary	0.0107399	0.849944	0.417273	0.04166	0.356792
ENSG00000213760.6	ATP6V1G2	HLA-A	A.02_06_01_01	Yes	primary	0.0107399	1.21511	0.608555	0.0458561	0.370781
ENSG00000206341.6	HLA-H	HLA-A	A.02_06_01_01	Yes	conditional on the lead primary, conditional 1 and conditional 2 SNP eQTL	0.0107399	-1.23023	0.634144	0.0523824	0.395488
ENSG00000241370.1	RPP21	HLA-A	A.02_06_01_01	Yes	primary	0.0107399	-1.07121	0.553615	0.0529985	0.397348
ENSG00000204475.5	NCR3	HLA-A	A.02_06_01_01	Yes	primary	0.0107399	-1.22794	0.636923	0.0538643	0.399682
ENSG00000237669.1	HCG4P3	HLA-A	A.02_06_01_01	Yes	conditional on the lead primary SNP eQTL	0.0107399	-1.19599	0.634149	0.0592977	0.414747
ENSG00000237669.1	HCG4P3	HLA-A	A.02_06_01_01	Yes	conditional on the lead primary, conditional 1 and conditional 2 SNP eQTL	0.0107399	-1.19491	0.634426	0.0596396	0.415317
ENSG00000244731.3	C4A	HLA-A	A.02_06_01_01	Yes	primary	0.0107399	1.22651	0.653512	0.0605451	0.418032
ENSG00000204642.9	HLA-F	HLA-A	A.02_06_01_01	Yes	primary	0.0107399	-1.05452	0.563803	0.0614331	0.420344
ENSG00000230313.1	HCG24	HLA-A	A.02_06_01_01	Yes	primary	0.0107399	-1.1728	0.634857	0.064697	0.42955
ENSG00000214922.5	HLA-F-AS1	HLA-A	A.02_06_01_01	Yes	conditional on the lead primary SNP eQTL	0.0107399	-0.955198	0.529772	0.0713828	0.447359
ENSG00000206341.6	HLA-H	HLA-A	A.02_06_01_01	Yes	primary	0.0107399	-1.14416	0.639886	0.0737646	0.453794
ENSG00000137337.10	MDC1	HLA-A	A.02_06_01_01	Yes	primary	0.0107399	1.0011	0.559993	0.0738257	0.454003
ENSG00000204310.6	AGPAT1	HLA-A	A.02_06_01_01	Yes	conditional on the lead primary SNP eQTL	0.0107399	-0.927731	0.521299	0.0751329	0.457777
ENSG00000204439.3	C6orf47	HLA-A	A.02_06_01_01	Yes	primary	0.0107399	0.889239	0.515591	0.084582	0.480613
ENSG00000258388.3	PPT2-EGFL8	HLA-A	A.02_06_01_01	Yes	primary	0.0107399	1.1922	0.69708	0.0872136	0.486634
ENSG00000204439.3	C6orf47	HLA-A	A.02_06_01_01	Yes	conditional on the lead primary SNP eQTL	0.0107399	0.846427	0.505219	0.0938623	0.500593
ENSG00000196126.6	HLA-DRB1	HLA-A	A.02_06_01_01	Yes	primary	0.0107399	-1.04465	0.623897	0.0940522	0.501012
ENSG00000214922.5	HLA-F-AS1	HLA-A	A.02_06_01_01	Yes	primary	0.0107399	-0.957315	0.573684	0.095174	0.502595
ENSG00000204520.8	MICA	HLA-A	A.02_06_01_01	Yes	conditional on the lead primary, conditional 1 and conditional 2 SNP eQTL	0.0107399	0.925896	0.5586	0.0974126	0.507276
ENSG00000137331.11	IER3	HLA-A	A.02_06_01_01	Yes	primary	0.0107399	0.736563	0.446439	0.0989713	0.510307
ENSG00000137312.10	FLOT1	HLA-A	A.02_06_01_01	Yes	primary	0.0107399	0.842374	0.520996	0.10591	0.524528
ENSG00000213780.6	GTF2H4	HLA-A	A.02_06_01_01	Yes	conditional on the lead primary, conditional 1 and conditional 2 SNP eQTL	0.0107399	0.806138	0.519423	0.120665	0.547633
ENSG00000204264.4	PSMB8	HLA-A	A.02_06_01_01	Yes	primary	0.0107399	-0.74678	0.482597	0.121762	0.549558
ENSG00000213780.6	GTF2H4	HLA-A	A.02_06_01_01	Yes	primary	0.0107399	0.889303	0.580176	0.125321	0.555651
ENSG00000204310.6	AGPAT1	HLA-A	A.02_06_01_01	Yes	primary	0.0107399	-0.849448	0.557698	0.127726	0.559915
ENSG00000242574.4	HLA-DMB	HLA-A	A.02_06_01_01	Yes	primary	0.0107399	0.949222	0.626327	0.129636	0.562425
ENSG00000237669.1	HCG4P3	HLA-A	A.02_06_01_01	Yes	primary	0.0107399	-1.03565	0.688686	0.132633	0.565886
ENSG00000254870.1	ATP6V1G2-DDX39B	HLA-A	A.02_06_01_01	Yes	conditional on the lead primary SNP eQTL	0.0107399	0.602956	0.405179	0.136718	0.57169
ENSG00000213780.6	GTF2H4	HLA-A	A.02_06_01_01	Yes	conditional on the lead primary SNP eQTL	0.0107399	0.77318	0.519995	0.137041	0.572075
ENSG00000254870.1	ATP6V1G2-DDX39B	HLA-A	A.02_06_01_01	Yes	conditional on the lead primary and conditional 1 SNP eQTL	0.0107399	0.616729	0.418844	0.140898	0.578201
ENSG00000204590.8	GNL1	HLA-A	A.02_06_01_01	Yes	primary	0.0107399	-0.670707	0.455918	0.141261	0.578846
ENSG00000204569.5	PPP1R10	HLA-A	A.02_06_01_01	Yes	primary	0.0107399	0.950277	0.647941	0.142482	0.581034
ENSG00000204520.8	MICA	HLA-A	A.02_06_01_01	Yes	primary	0.0107399	0.828211	0.569135	0.145611	0.58569
ENSG00000204435.9	CSNK2B	HLA-A	A.02_06_01_01	Yes	primary	0.0107399	0.755291	0.51961	0.146065	0.586333
ENSG00000204310.6	AGPAT1	HLA-A	A.02_06_01_01	Yes	conditional on the lead primary and conditional 1 SNP eQTL	0.0107399	-0.780464	0.537919	0.146809	0.587454
ENSG00000137404.10	NRM	HLA-A	A.02_06_01_01	Yes	primary	0.0107399	-0.770744	0.532925	0.148107	0.588873
ENSG00000204310.6	AGPAT1	HLA-A	A.02_06_01_01	Yes	conditional on the lead primary, conditional 1 and conditional 2 SNP eQTL	0.0107399	-0.787741	0.544964	0.14832	0.589249
ENSG00000168394.9	TAP1	HLA-A	A.02_06_01_01	Yes	conditional on the lead primary SNP eQTL	0.0107399	-0.763287	0.544089	0.160655	0.604912
ENSG00000204632.7	HLA-G	HLA-A	A.02_06_01_01	Yes	primary	0.0107399	0.864632	0.622775	0.165029	0.61085
ENSG00000204387.8	C6orf48	HLA-A	A.02_06_01_01	Yes	primary	0.0107399	-0.626743	0.453515	0.166981	0.613175
ENSG00000254870.1	ATP6V1G2-DDX39B	HLA-A	A.02_06_01_01	Yes	primary	0.0107399	0.665123	0.483321	0.168774	0.615645
ENSG00000230313.1	HCG24	HLA-A	A.02_06_01_01	Yes	conditional on the lead primary SNP eQTL	0.0107399	-0.812194	0.591521	0.169733	0.616897
ENSG00000204388.5	HSPA1B	HLA-A	A.02_06_01_01	Yes	primary	0.0107399	-0.793846	0.582602	0.173012	0.621509
ENSG00000242574.4	HLA-DMB	HLA-A	A.02_06_01_01	Yes	conditional on the lead primary, conditional 1 and conditional 2 SNP eQTL	0.0107399	0.801589	0.597487	0.179726	0.630464
ENSG00000204469.8	PRRC2A	HLA-A	A.02_06_01_01	Yes	primary	0.0107399	-0.665692	0.502	0.184813	0.637366
ENSG00000244355.3	LY6G6D	HLA-A	A.02_06_01_01	Yes	primary	0.0107399	0.880117	0.667582	0.187381	0.639654
ENSG00000204287.9	HLA-DRA	HLA-A	A.02_06_01_01	Yes	conditional on the lead primary SNP eQTL	0.0107399	0.813228	0.618117	0.18829	0.640471
ENSG00000213654.5	GPSM3	HLA-A	A.02_06_01_01	Yes	primary	0.0107399	0.680843	0.52308	0.193051	0.646288
ENSG00000231389.3	HLA-DPA1	HLA-A	A.02_06_01_01	Yes	primary	0.0107399	-0.713173	0.560567	0.20329	0.658017
ENSG00000204520.8	MICA	HLA-A	A.02_06_01_01	Yes	conditional on the lead primary and conditional 1 SNP eQTL	0.0107399	0.685546	0.544506	0.208022	0.66276
ENSG00000254870.1	ATP6V1G2-DDX39B	HLA-A	A.02_06_01_01	Yes	conditional on the lead primary, conditional 1 and conditional 2 SNP eQTL	0.0107399	0.549042	0.44297	0.215177	0.669153
ENSG00000204256.8	BRD2	HLA-A	A.02_06_01_01	Yes	primary	0.0107399	0.622937	0.511134	0.222944	0.677239
ENSG00000137310.7	TCF19	HLA-A	A.02_06_01_01	Yes	primary	0.0107399	0.617198	0.512474	0.228455	0.681413
ENSG00000250535.1	STK19P	HLA-A	A.02_06_01_01	Yes	primary	0.0107399	0.733499	0.613219	0.231639	0.684152
ENSG00000204389.8	HSPA1A	HLA-A	A.02_06_01_01	Yes	conditional on the lead primary, conditional 1 and conditional 2 SNP eQTL	0.0107399	-0.645269	0.541699	0.233577	0.686065
ENSG00000204463.8	BAG6	HLA-A	A.02_06_01_01	Yes	primary	0.0107399	0.607995	0.518335	0.240805	0.693152
ENSG00000137312.10	FLOT1	HLA-A	A.02_06_01_01	Yes	conditional on the lead primary SNP eQTL	0.0107399	0.595548	0.508261	0.241303	0.693686
ENSG00000204252.8	HLA-DOA	HLA-A	A.02_06_01_01	Yes	primary	0.0107399	0.645626	0.552407	0.242504	0.694503
ENSG00000240053.8	LY6G5B	HLA-A	A.02_06_01_01	Yes	primary	0.0107399	0.517817	0.448643	0.248424	0.700315
ENSG00000227766.1	HCG4P5	HLA-A	A.02_06_01_01	Yes	primary	0.0107399	-0.727167	0.635139	0.252253	0.703683
ENSG00000236603.1	RANP1	HLA-A	A.02_06_01_01	Yes	primary	0.0107399	-0.414876	0.366325	0.25741	0.709016
ENSG00000204256.8	BRD2	HLA-A	A.02_06_01_01	Yes	conditional on the lead primary SNP eQTL	0.0107399	0.540152	0.49663	0.276756	0.724223
ENSG00000230313.1	HCG24	HLA-A	A.02_06_01_01	Yes	conditional on the lead primary and conditional 1 SNP eQTL	0.0107399	-0.706177	0.649498	0.27692	0.724365
ENSG00000224557.3	HLA-DPB2	HLA-A	A.02_06_01_01	Yes	primary	0.0107399	0.65529	0.605338	0.279022	0.726076
ENSG00000204564.7	C6orf136	HLA-A	A.02_06_01_01	Yes	primary	0.0107399	-0.700324	0.647735	0.279613	0.726459
ENSG00000204599.10	TRIM39	HLA-A	A.02_06_01_01	Yes	primary	0.0107399	0.430663	0.403094	0.285343	0.731414
ENSG00000204574.8	ABCF1	HLA-A	A.02_06_01_01	Yes	conditional on the lead primary and conditional 1 SNP eQTL	0.0107399	0.441188	0.417557	0.290696	0.736455
ENSG00000242574.4	HLA-DMB	HLA-A	A.02_06_01_01	Yes	conditional on the lead primary SNP eQTL	0.0107399	0.614265	0.584756	0.293505	0.739196
ENSG00000255152.4	MSH5-SAPCD1	HLA-A	A.02_06_01_01	Yes	primary	0.0107399	-0.62974	0.60584	0.298596	0.743283
ENSG00000243753.1	HLA-L	HLA-A	A.02_06_01_01	Yes	primary	0.0107399	0.644496	0.625012	0.302459	0.745574
ENSG00000228962.1	HCG23	HLA-A	A.02_06_01_01	Yes	conditional on the lead primary SNP eQTL	0.0107399	-0.617651	0.600383	0.303592	0.746012
ENSG00000223865.6	HLA-DPB1	HLA-A	A.02_06_01_01	Yes	conditional on the lead primary SNP eQTL	0.0107399	0.485065	0.471711	0.303804	0.746128
ENSG00000227766.1	HCG4P5	HLA-A	A.02_06_01_01	Yes	conditional on the lead primary SNP eQTL	0.0107399	-0.610458	0.598152	0.307457	0.748259
ENSG00000234745.5	HLA-B	HLA-A	A.02_06_01_01	Yes	primary	0.0107399	0.649912	0.641028	0.31065	0.750352
ENSG00000204642.9	HLA-F	HLA-A	A.02_06_01_01	Yes	conditional on the lead primary SNP eQTL	0.0107399	-0.543495	0.54031	0.314466	0.753034
ENSG00000168477.13	TNXB	HLA-A	A.02_06_01_01	Yes	conditional on the lead primary, conditional 1 and conditional 2 SNP eQTL	0.0107399	0.601108	0.598017	0.314815	0.75345
ENSG00000168477.13	TNXB	HLA-A	A.02_06_01_01	Yes	conditional on the lead primary SNP eQTL	0.0107399	0.596439	0.594663	0.315867	0.75402
ENSG00000204301.5	NOTCH4	HLA-A	A.02_06_01_01	Yes	primary	0.0107399	-0.592128	0.598431	0.322434	0.75929
ENSG00000204261.4	TAPSAR1	HLA-A	A.02_06_01_01	Yes	primary	0.0107399	-0.637221	0.649961	0.326889	0.762066
ENSG00000166278.10	C2	HLA-A	A.02_06_01_01	Yes	primary	0.0107399	-0.622428	0.640609	0.33124	0.765601
ENSG00000204386.6	NEU1	HLA-A	A.02_06_01_01	Yes	primary	0.0107399	-0.526068	0.54204	0.33178	0.766039
ENSG00000137343.13	ATAT1	HLA-A	A.02_06_01_01	Yes	primary	0.0107399	-0.49813	0.51621	0.334557	0.768122
ENSG00000230795.2	HLA-K	HLA-A	A.02_06_01_01	Yes	conditional on the lead primary and conditional 1 SNP eQTL	0.0107399	-0.521605	0.541499	0.335416	0.768549
ENSG00000204525.10	HLA-C	HLA-A	A.02_06_01_01	Yes	primary	0.0107399	-0.519843	0.544931	0.340104	0.771581
ENSG00000204574.8	ABCF1	HLA-A	A.02_06_01_01	Yes	primary	0.0107399	0.407566	0.428843	0.341917	0.772644
ENSG00000204315.3	FKBPL	HLA-A	A.02_06_01_01	Yes	primary	0.0107399	0.480632	0.511387	0.34729	0.776403
ENSG00000179344.12	HLA-DQB1	HLA-A	A.02_06_01_01	Yes	conditional on the lead primary SNP eQTL	0.0107399	-0.500486	0.54693	0.360148	0.785293
ENSG00000204444.6	APOM	HLA-A	A.02_06_01_01	Yes	conditional on the lead primary, conditional 1 and conditional 2 SNP eQTL	0.0107399	0.494347	0.541494	0.361278	0.785851
ENSG00000168394.9	TAP1	HLA-A	A.02_06_01_01	Yes	conditional on the lead primary and conditional 1 SNP eQTL	0.0107399	-0.510605	0.562042	0.363624	0.787155
ENSG00000179344.12	HLA-DQB1	HLA-A	A.02_06_01_01	Yes	primary	0.0107399	-0.539543	0.595838	0.36519	0.788027
ENSG00000204516.5	MICB	HLA-A	A.02_06_01_01	Yes	primary	0.0107399	-0.448695	0.496979	0.366608	0.78888
ENSG00000204389.8	HSPA1A	HLA-A	A.02_06_01_01	Yes	conditional on the lead primary SNP eQTL	0.0107399	-0.424267	0.480582	0.377334	0.79539
ENSG00000213719.4	CLIC1	HLA-A	A.02_06_01_01	Yes	primary	0.0107399	0.393211	0.450535	0.382792	0.798948
ENSG00000204421.2	LY6G6C	HLA-A	A.02_06_01_01	Yes	primary	0.0107399	0.603155	0.694149	0.384895	0.800119
ENSG00000214922.5	HLA-F-AS1	HLA-A	A.02_06_01_01	Yes	conditional on the lead primary, conditional 1 and conditional 2 SNP eQTL	0.0107399	-0.449485	0.519742	0.387136	0.801601
ENSG00000137411.12	VARS2	HLA-A	A.02_06_01_01	Yes	primary	0.0107399	-0.442202	0.513738	0.389373	0.803193
ENSG00000204438.6	GPANK1	HLA-A	A.02_06_01_01	Yes	primary	0.0107399	0.487073	0.566458	0.389868	0.803574
ENSG00000204576.7	PRR3	HLA-A	A.02_06_01_01	Yes	conditional on the lead primary, conditional 1 and conditional 2 SNP eQTL	0.0107399	0.375961	0.437366	0.390008	0.803667
ENSG00000204314.6	PRRT1	HLA-A	A.02_06_01_01	Yes	primary	0.0107399	0.483887	0.581646	0.40545	0.812802
ENSG00000204574.8	ABCF1	HLA-A	A.02_06_01_01	Yes	conditional on the lead primary SNP eQTL	0.0107399	0.334998	0.4079	0.41149	0.816686
ENSG00000204623.4	ZNRD1-AS1	HLA-A	A.02_06_01_01	Yes	primary	0.0107399	-0.468705	0.574912	0.414922	0.818882
ENSG00000204520.8	MICA	HLA-A	A.02_06_01_01	Yes	conditional on the lead primary SNP eQTL	0.0107399	0.545665	0.682133	0.423746	0.823141
ENSG00000206344.6	HCG27	HLA-A	A.02_06_01_01	Yes	primary	0.0107399	0.544838	0.685223	0.42654	0.824193
ENSG00000240053.8	LY6G5B	HLA-A	A.02_06_01_01	Yes	conditional on the lead primary SNP eQTL	0.0107399	0.345274	0.435131	0.42749	0.824536
ENSG00000263020.1	CSNK2B-LY6G5B-1181	HLA-A	A.02_06_01_01	Yes	primary	0.0107399	0.491187	0.623237	0.430626	0.826429
ENSG00000204385.6	SLC44A4	HLA-A	A.02_06_01_01	Yes	conditional on the lead primary SNP eQTL	0.0107399	-0.396359	0.504238	0.431835	0.827297
ENSG00000213722.4	DDAH2	HLA-A	A.02_06_01_01	Yes	primary	0.0107399	-0.347637	0.445754	0.435458	0.82961
ENSG00000272273.1	XXbac-BPG252P9.10	HLA-A	A.02_06_01_01	Yes	primary	0.0107399	-0.513447	0.658771	0.435744	0.829763
ENSG00000204438.6	GPANK1	HLA-A	A.02_06_01_01	Yes	conditional on the lead primary, conditional 1 and conditional 2 SNP eQTL	0.0107399	0.430217	0.55376	0.437217	0.83046
ENSG00000237042.1	MICG	HLA-A	A.02_06_01_01	Yes	primary	0.0107399	0.369153	0.475952	0.43798	0.831175
ENSG00000241106.2	HLA-DOB	HLA-A	A.02_06_01_01	Yes	conditional on the lead primary and conditional 1 SNP eQTL	0.0107399	0.649189	0.84568	0.442694	0.834191
ENSG00000204438.6	GPANK1	HLA-A	A.02_06_01_01	Yes	conditional on the lead primary SNP eQTL	0.0107399	0.401709	0.539473	0.456494	0.840261
ENSG00000214922.5	HLA-F-AS1	HLA-A	A.02_06_01_01	Yes	conditional on the lead primary and conditional 1 SNP eQTL	0.0107399	-0.380629	0.514727	0.459618	0.841665
ENSG00000237923.1	XXbac-BPG27H4.8	HLA-A	A.02_06_01_01	Yes	primary	0.0107399	-0.355105	0.482429	0.461684	0.842702
ENSG00000235781.1	XXbac-BPG249D20.9	HLA-A	A.02_06_01_01	Yes	primary	0.0107399	0.518486	0.705782	0.462567	0.843128
ENSG00000204444.6	APOM	HLA-A	A.02_06_01_01	Yes	conditional on the lead primary SNP eQTL	0.0107399	0.394236	0.538419	0.46404	0.843839
ENSG00000263756.1	XXbac-BPG181M17.6	HLA-A	A.02_06_01_01	Yes	primary	0.0107399	0.512168	0.700831	0.4649	0.84399
ENSG00000204315.3	FKBPL	HLA-A	A.02_06_01_01	Yes	conditional on the lead primary SNP eQTL	0.0107399	0.351769	0.484866	0.468147	0.845839
ENSG00000204385.6	SLC44A4	HLA-A	A.02_06_01_01	Yes	conditional on the lead primary and conditional 1 SNP eQTL	0.0107399	-0.364629	0.504429	0.46977	0.846622
ENSG00000066379.10	ZNRD1	HLA-A	A.02_06_01_01	Yes	conditional on the lead primary SNP eQTL	0.0107399	-0.388684	0.539414	0.471176	0.847257
ENSG00000204348.5	DXO	HLA-A	A.02_06_01_01	Yes	primary	0.0107399	0.387733	0.544884	0.476719	0.84944
ENSG00000227766.1	HCG4P5	HLA-A	A.02_06_01_01	Yes	conditional on the lead primary and conditional 1 SNP eQTL	0.0107399	-0.441821	0.621899	0.477432	0.849778
ENSG00000137310.7	TCF19	HLA-A	A.02_06_01_01	Yes	conditional on the lead primary and conditional 1 SNP eQTL	0.0107399	0.342478	0.490033	0.484622	0.853471
ENSG00000204396.6	VWA7	HLA-A	A.02_06_01_01	Yes	conditional on the lead primary SNP eQTL	0.0107399	0.453762	0.661074	0.49246	0.856905
ENSG00000206341.6	HLA-H	HLA-A	A.02_06_01_01	Yes	conditional on the lead primary SNP eQTL	0.0107399	-0.370899	0.543023	0.494591	0.857796
ENSG00000204348.5	DXO	HLA-A	A.02_06_01_01	Yes	conditional on the lead primary SNP eQTL	0.0107399	0.346575	0.507985	0.495078	0.857948
ENSG00000236603.1	RANP1	HLA-A	A.02_06_01_01	Yes	conditional on the lead primary SNP eQTL	0.0107399	-0.243266	0.356801	0.495367	0.858152
ENSG00000204463.8	BAG6	HLA-A	A.02_06_01_01	Yes	conditional on the lead primary and conditional 1 SNP eQTL	0.0107399	0.344199	0.510139	0.499856	0.8602
ENSG00000206341.6	HLA-H	HLA-A	A.02_06_01_01	Yes	conditional on the lead primary and conditional 1 SNP eQTL	0.0107399	-0.356168	0.544079	0.512709	0.865835
ENSG00000204315.3	FKBPL	HLA-A	A.02_06_01_01	Yes	conditional on the lead primary, conditional 1 and conditional 2 SNP eQTL	0.0107399	0.309707	0.47323	0.512819	0.865953
ENSG00000168477.13	TNXB	HLA-A	A.02_06_01_01	Yes	primary	0.0107399	0.358051	0.556896	0.520263	0.869283
ENSG00000228415.2	PTMAP1	HLA-A	A.02_06_01_01	Yes	primary	0.0107399	0.406584	0.637713	0.523756	0.871216
ENSG00000204428.8	LY6G5C	HLA-A	A.02_06_01_01	Yes	primary	0.0107399	0.406504	0.641768	0.526464	0.872296
ENSG00000204396.6	VWA7	HLA-A	A.02_06_01_01	Yes	primary	0.0107399	0.429428	0.680344	0.527914	0.87284
ENSG00000204540.6	PSORS1C1	HLA-A	A.02_06_01_01	Yes	primary	0.0107399	-0.439106	0.6962	0.528225	0.87287
ENSG00000230795.2	HLA-K	HLA-A	A.02_06_01_01	Yes	conditional on the lead primary SNP eQTL	0.0107399	-0.348542	0.557773	0.532049	0.874515
ENSG00000204642.9	HLA-F	HLA-A	A.02_06_01_01	Yes	conditional on the lead primary, conditional 1 and conditional 2 SNP eQTL	0.0107399	-0.338435	0.54684	0.535987	0.876171
ENSG00000137310.7	TCF19	HLA-A	A.02_06_01_01	Yes	conditional on the lead primary SNP eQTL	0.0107399	0.298715	0.489305	0.541538	0.878681
ENSG00000204444.6	APOM	HLA-A	A.02_06_01_01	Yes	primary	0.0107399	0.317162	0.522262	0.543662	0.879498
ENSG00000213719.4	CLIC1	HLA-A	A.02_06_01_01	Yes	conditional on the lead primary and conditional 1 SNP eQTL	0.0107399	0.267272	0.440311	0.543845	0.879498
ENSG00000196735.7	HLA-DQA1	HLA-A	A.02_06_01_01	Yes	primary	0.0107399	-0.392274	0.658943	0.551638	0.884074
ENSG00000204315.3	FKBPL	HLA-A	A.02_06_01_01	Yes	conditional on the lead primary and conditional 1 SNP eQTL	0.0107399	0.282753	0.479991	0.555807	0.886158
ENSG00000204428.8	LY6G5C	HLA-A	A.02_06_01_01	Yes	conditional on the lead primary SNP eQTL	0.0107399	0.359397	0.619622	0.561897	0.888095
ENSG00000204390.8	HSPA1L	HLA-A	A.02_06_01_01	Yes	primary	0.0107399	-0.365044	0.644612	0.57119	0.891587
ENSG00000204305.9	AGER	HLA-A	A.02_06_01_01	Yes	primary	0.0107399	0.302518	0.538512	0.574275	0.893082
ENSG00000204351.7	SKIV2L	HLA-A	A.02_06_01_01	Yes	primary	0.0107399	-0.355738	0.63327	0.574289	0.893083
ENSG00000239257.1	RPL23AP1	HLA-A	A.02_06_01_01	Yes	primary	0.0107399	-0.370231	0.659091	0.5743	0.893083
ENSG00000228415.2	PTMAP1	HLA-A	A.02_06_01_01	Yes	conditional on the lead primary SNP eQTL	0.0107399	0.338715	0.61774	0.583477	0.896394
ENSG00000272221.1	XXbac-BPG181B23.7	HLA-A	A.02_06_01_01	Yes	primary	0.0107399	0.3646	0.670896	0.586818	0.897525
ENSG00000204304.7	PBX2	HLA-A	A.02_06_01_01	Yes	conditional on the lead primary SNP eQTL	0.0107399	-0.248685	0.464243	0.592181	0.899917
ENSG00000234745.5	HLA-B	HLA-A	A.02_06_01_01	Yes	conditional on the lead primary SNP eQTL	0.0107399	-0.289375	0.554101	0.601501	0.903922
ENSG00000241404.2	EGFL8	HLA-A	A.02_06_01_01	Yes	conditional on the lead primary and conditional 1 SNP eQTL	0.0107399	0.311213	0.598228	0.602907	0.904318
ENSG00000241404.2	EGFL8	HLA-A	A.02_06_01_01	Yes	conditional on the lead primary SNP eQTL	0.0107399	0.308898	0.597486	0.605158	0.905369
ENSG00000228962.1	HCG23	HLA-A	A.02_06_01_01	Yes	primary	0.0107399	-0.316636	0.644014	0.62296	0.911855
ENSG00000214894.2	LINC00243	HLA-A	A.02_06_01_01	Yes	primary	0.0107399	0.332813	0.679714	0.624391	0.912113
ENSG00000241404.2	EGFL8	HLA-A	A.02_06_01_01	Yes	primary	0.0107399	0.300849	0.617109	0.625895	0.912652
ENSG00000204599.10	TRIM39	HLA-A	A.02_06_01_01	Yes	conditional on the lead primary SNP eQTL	0.0107399	0.173323	0.380002	0.648311	0.921038
ENSG00000168394.9	TAP1	HLA-A	A.02_06_01_01	Yes	primary	0.0107399	-0.281846	0.618358	0.648536	0.921038
ENSG00000204498.6	NFKBIL1	HLA-A	A.02_06_01_01	Yes	primary	0.0107399	-0.216778	0.479663	0.651313	0.921974
ENSG00000223865.6	HLA-DPB1	HLA-A	A.02_06_01_01	Yes	conditional on the lead primary, conditional 1 and conditional 2 SNP eQTL	0.0107399	-0.212231	0.480231	0.658536	0.924661
ENSG00000227939.1	RPL3P2	HLA-A	A.02_06_01_01	Yes	primary	0.0107399	-0.253984	0.575877	0.659185	0.924709
ENSG00000270604.1	HCG17	HLA-A	A.02_06_01_01	Yes	primary	0.0107399	-0.295619	0.677336	0.662514	0.925426
ENSG00000204392.6	LSM2	HLA-A	A.02_06_01_01	Yes	primary	0.0107399	0.244379	0.565374	0.665565	0.926624
ENSG00000213719.4	CLIC1	HLA-A	A.02_06_01_01	Yes	conditional on the lead primary SNP eQTL	0.0107399	0.18745	0.435655	0.666998	0.926793
ENSG00000224328.1	MDC1-AS1	HLA-A	A.02_06_01_01	Yes	primary	0.0107399	0.29469	0.693528	0.670899	0.927399
ENSG00000204389.8	HSPA1A	HLA-A	A.02_06_01_01	Yes	primary	0.0107399	-0.232386	0.554177	0.674971	0.92828
ENSG00000198563.9	DDX39B	HLA-A	A.02_06_01_01	Yes	primary	0.0107399	-0.0687598	0.168959	0.684035	0.931427
ENSG00000204394.8	VARS	HLA-A	A.02_06_01_01	Yes	primary	0.0107399	0.208512	0.513387	0.684633	0.931544
ENSG00000204257.10	HLA-DMA	HLA-A	A.02_06_01_01	Yes	conditional on the lead primary and conditional 1 SNP eQTL	0.0107399	0.31816	0.79237	0.68803	0.9326
ENSG00000204410.10	MSH5	HLA-A	A.02_06_01_01	Yes	primary	0.0107399	0.194821	0.501728	0.697794	0.935456
ENSG00000204371.7	EHMT2	HLA-A	A.02_06_01_01	Yes	primary	0.0107399	-0.185068	0.486073	0.703396	0.937331
ENSG00000223865.6	HLA-DPB1	HLA-A	A.02_06_01_01	Yes	primary	0.0107399	-0.213158	0.567761	0.707336	0.938438
ENSG00000198563.9	DDX39B	HLA-A	A.02_06_01_01	Yes	conditional on the lead primary SNP eQTL	0.0107399	-0.0606813	0.161677	0.70742	0.938447
ENSG00000272221.1	XXbac-BPG181B23.7	HLA-A	A.02_06_01_01	Yes	conditional on the lead primary SNP eQTL	0.0107399	0.231356	0.619067	0.708615	0.938707
ENSG00000224557.3	HLA-DPB2	HLA-A	A.02_06_01_01	Yes	conditional on the lead primary and conditional 1 SNP eQTL	0.0107399	0.194882	0.524799	0.71038	0.93934
ENSG00000224557.3	HLA-DPB2	HLA-A	A.02_06_01_01	Yes	conditional on the lead primary SNP eQTL	0.0107399	0.193156	0.522633	0.711694	0.939686
ENSG00000234745.5	HLA-B	HLA-A	A.02_06_01_01	Yes	conditional on the lead primary, conditional 1 and conditional 2 SNP eQTL	0.0107399	-0.202949	0.549971	0.712114	0.939898
ENSG00000200816.1	SNORA38	HLA-A	A.02_06_01_01	Yes	primary	0.0107399	0.204086	0.560811	0.715924	0.940841
ENSG00000243753.1	HLA-L	HLA-A	A.02_06_01_01	Yes	conditional on the lead primary, conditional 1 and conditional 2 SNP eQTL	0.0107399	0.221105	0.614819	0.719127	0.942099
ENSG00000204568.7	MRPS18B	HLA-A	A.02_06_01_01	Yes	primary	0.0107399	-0.20042	0.559388	0.72013	0.94238
ENSG00000227507.2	LTB	HLA-A	A.02_06_01_01	Yes	primary	0.0107399	0.173604	0.496545	0.726621	0.944035
ENSG00000204538.3	PSORS1C2	HLA-A	A.02_06_01_01	Yes	conditional on the lead primary SNP eQTL	0.0107399	0.188637	0.546094	0.729771	0.944909
ENSG00000230795.2	HLA-K	HLA-A	A.02_06_01_01	Yes	primary	0.0107399	0.206215	0.606898	0.734018	0.946203
ENSG00000213676.6	ATF6B	HLA-A	A.02_06_01_01	Yes	conditional on the lead primary SNP eQTL	0.0107399	0.160763	0.487027	0.741331	0.948968
ENSG00000221988.8	PPT2	HLA-A	A.02_06_01_01	Yes	primary	0.0107399	-0.176554	0.556229	0.750931	0.950998
ENSG00000066379.10	ZNRD1	HLA-A	A.02_06_01_01	Yes	primary	0.0107399	-0.183515	0.579244	0.751381	0.951145
ENSG00000204592.5	HLA-E	HLA-A	A.02_06_01_01	Yes	primary	0.0107399	-0.153662	0.505099	0.760959	0.953324
ENSG00000204385.6	SLC44A4	HLA-A	A.02_06_01_01	Yes	primary	0.0107399	-0.159434	0.52584	0.761739	0.953425
ENSG00000204538.3	PSORS1C2	HLA-A	A.02_06_01_01	Yes	conditional on the lead primary and conditional 1 SNP eQTL	0.0107399	0.171548	0.573469	0.764833	0.953634
ENSG00000204525.10	HLA-C	HLA-A	A.02_06_01_01	Yes	conditional on the lead primary and conditional 1 SNP eQTL	0.0107399	-0.149765	0.504238	0.766458	0.954008
ENSG00000204371.7	EHMT2	HLA-A	A.02_06_01_01	Yes	conditional on the lead primary, conditional 1 and conditional 2 SNP eQTL	0.0107399	-0.135103	0.460626	0.76929	0.954659
ENSG00000204463.8	BAG6	HLA-A	A.02_06_01_01	Yes	conditional on the lead primary SNP eQTL	0.0107399	0.148505	0.513255	0.772321	0.955209
ENSG00000204472.8	AIF1	HLA-A	A.02_06_01_01	Yes	conditional on the lead primary SNP eQTL	0.0107399	0.152246	0.527042	0.772682	0.955367
ENSG00000204371.7	EHMT2	HLA-A	A.02_06_01_01	Yes	conditional on the lead primary SNP eQTL	0.0107399	-0.132438	0.459725	0.773285	0.955409
ENSG00000204536.9	CCHCR1	HLA-A	A.02_06_01_01	Yes	primary	0.0107399	0.171277	0.641262	0.789397	0.959124
ENSG00000204472.8	AIF1	HLA-A	A.02_06_01_01	Yes	conditional on the lead primary, conditional 1 and conditional 2 SNP eQTL	0.0107399	0.136375	0.527318	0.795928	0.96069
ENSG00000204618.4	RNF39	HLA-A	A.02_06_01_01	Yes	primary	0.0107399	-0.157773	0.612551	0.796741	0.960754
ENSG00000204387.8	C6orf48	HLA-A	A.02_06_01_01	Yes	conditional on the lead primary SNP eQTL	0.0107399	0.104805	0.416962	0.80154	0.961823
ENSG00000224389.4	C4B	HLA-A	A.02_06_01_01	Yes	conditional on the lead primary SNP eQTL	0.0107399	0.156315	0.62984	0.803994	0.962434
ENSG00000198563.9	DDX39B	HLA-A	A.02_06_01_01	Yes	conditional on the lead primary and conditional 1 SNP eQTL	0.0107399	-8.33421e-18	3.51706e-17	0.812684	0.964155
ENSG00000227507.2	LTB	HLA-A	A.02_06_01_01	Yes	conditional on the lead primary, conditional 1 and conditional 2 SNP eQTL	0.0107399	-0.115679	0.488197	0.812694	0.964155
ENSG00000223865.6	HLA-DPB1	HLA-A	A.02_06_01_01	Yes	conditional on the lead primary and conditional 1 SNP eQTL	0.0107399	-0.109727	0.464926	0.813425	0.964186
ENSG00000229836.1	XXbac-BPG248L24.10	HLA-A	A.02_06_01_01	Yes	conditional on the lead primary SNP eQTL	0.0107399	-0.142006	0.602509	0.813673	0.964189
ENSG00000229836.1	XXbac-BPG248L24.10	HLA-A	A.02_06_01_01	Yes	primary	0.0107399	-0.140458	0.621216	0.821122	0.96607
ENSG00000234745.5	HLA-B	HLA-A	A.02_06_01_01	Yes	conditional on the lead primary and conditional 1 SNP eQTL	0.0107399	-0.125823	0.557644	0.821486	0.96607
ENSG00000176998.3	HCG4	HLA-A	A.02_06_01_01	Yes	conditional on the lead primary SNP eQTL	0.0107399	-0.121431	0.542606	0.822919	0.966229
ENSG00000204642.9	HLA-F	HLA-A	A.02_06_01_01	Yes	conditional on the lead primary and conditional 1 SNP eQTL	0.0107399	-0.132804	0.59645	0.823802	0.966229
ENSG00000204576.7	PRR3	HLA-A	A.02_06_01_01	Yes	primary	0.0107399	-0.109122	0.499702	0.827137	0.967379
ENSG00000176998.3	HCG4	HLA-A	A.02_06_01_01	Yes	primary	0.0107399	0.120366	0.586501	0.837395	0.970044
ENSG00000219797.2	PPIAP9	HLA-A	A.02_06_01_01	Yes	primary	0.0107399	0.140939	0.690528	0.838272	0.970155
ENSG00000204525.10	HLA-C	HLA-A	A.02_06_01_01	Yes	conditional on the lead primary SNP eQTL	0.0107399	-0.101265	0.505164	0.84112	0.970632
ENSG00000204592.5	HLA-E	HLA-A	A.02_06_01_01	Yes	conditional on the lead primary and conditional 1 SNP eQTL	0.0107399	-0.0949596	0.482558	0.843997	0.971473
ENSG00000204356.7	NELFE	HLA-A	A.02_06_01_01	Yes	primary	0.0107399	0.109331	0.564949	0.846549	0.971941
ENSG00000204472.8	AIF1	HLA-A	A.02_06_01_01	Yes	primary	0.0107399	-0.101894	0.553154	0.853852	0.972867
ENSG00000213676.6	ATF6B	HLA-A	A.02_06_01_01	Yes	conditional on the lead primary and conditional 1 SNP eQTL	0.0107399	-0.090068	0.52058	0.86264	0.974188
ENSG00000270604.1	HCG17	HLA-A	A.02_06_01_01	Yes	conditional on the lead primary SNP eQTL	0.0107399	0.105045	0.648277	0.871276	0.976204
ENSG00000204267.9	TAP2	HLA-A	A.02_06_01_01	Yes	primary	0.0107399	-0.0932496	0.606811	0.877869	0.97801
ENSG00000204366.3	ZBTB12	HLA-A	A.02_06_01_01	Yes	primary	0.0107399	0.0611406	0.405132	0.880043	0.978363
ENSG00000231074.4	HCG18	HLA-A	A.02_06_01_01	Yes	conditional on the lead primary, conditional 1 and conditional 2 SNP eQTL	0.0107399	-0.0610691	0.407067	0.880747	0.978363
ENSG00000204531.11	POU5F1	HLA-A	A.02_06_01_01	Yes	primary	0.0107399	0.0500792	0.335898	0.881482	0.978579
ENSG00000196230.8	TUBB	HLA-A	A.02_06_01_01	Yes	primary	0.0107399	-0.0498897	0.334628	0.881482	0.978579
ENSG00000235663.1	SAPCD1-AS1	HLA-A	A.02_06_01_01	Yes	primary	0.0107399	-0.102449	0.690603	0.882069	0.978625
ENSG00000230622.1	UQCRHP1	HLA-A	A.02_06_01_01	Yes	primary	0.0107399	-0.0980369	0.70186	0.888912	0.980143
ENSG00000224389.4	C4B	HLA-A	A.02_06_01_01	Yes	primary	0.0107399	0.0894556	0.646675	0.889978	0.980301
ENSG00000231074.4	HCG18	HLA-A	A.02_06_01_01	Yes	conditional on the lead primary SNP eQTL	0.0107399	-0.0563186	0.409252	0.890546	0.980365
ENSG00000272221.1	XXbac-BPG181B23.7	HLA-A	A.02_06_01_01	Yes	conditional on the lead primary and conditional 1 SNP eQTL	0.0107399	0.0836955	0.61062	0.890978	0.980423
ENSG00000204308.6	RNF5	HLA-A	A.02_06_01_01	Yes	conditional on the lead primary SNP eQTL	0.0107399	-0.0706917	0.536569	0.895184	0.981125
ENSG00000219797.2	PPIAP9	HLA-A	A.02_06_01_01	Yes	conditional on the lead primary SNP eQTL	0.0107399	0.0821476	0.677977	0.90356	0.982301
ENSG00000204538.3	PSORS1C2	HLA-A	A.02_06_01_01	Yes	primary	0.0107399	-0.0701719	0.590652	0.90543	0.982452
ENSG00000204304.7	PBX2	HLA-A	A.02_06_01_01	Yes	primary	0.0107399	0.0582942	0.509878	0.908976	0.983146
ENSG00000213676.6	ATF6B	HLA-A	A.02_06_01_01	Yes	primary	0.0107399	-0.0628923	0.550155	0.908986	0.983146
ENSG00000231074.4	HCG18	HLA-A	A.02_06_01_01	Yes	primary	0.0107399	-0.0447232	0.421232	0.915445	0.984031
ENSG00000204592.5	HLA-E	HLA-A	A.02_06_01_01	Yes	conditional on the lead primary SNP eQTL	0.0107399	-0.0469621	0.482905	0.922528	0.984965
ENSG00000204619.3	PPP1R11	HLA-A	A.02_06_01_01	Yes	primary	0.0107399	-0.057942	0.605556	0.923772	0.985223
ENSG00000228727.4	SAPCD1	HLA-A	A.02_06_01_01	Yes	primary	0.0107399	0.0428107	0.46639	0.926864	0.985775
ENSG00000206344.6	HCG27	HLA-A	A.02_06_01_01	Yes	conditional on the lead primary SNP eQTL	0.0107399	-0.0614257	0.683952	0.928438	0.986039
ENSG00000204308.6	RNF5	HLA-A	A.02_06_01_01	Yes	primary	0.0107399	-0.0482562	0.578163	0.933482	0.986851
ENSG00000204287.9	HLA-DRA	HLA-A	A.02_06_01_01	Yes	primary	0.0107399	0.0499573	0.65468	0.939174	0.988128
ENSG00000243753.1	HLA-L	HLA-A	A.02_06_01_01	Yes	conditional on the lead primary SNP eQTL	0.0107399	-0.0392181	0.601438	0.948009	0.98986
ENSG00000241106.2	HLA-DOB	HLA-A	A.02_06_01_01	Yes	conditional on the lead primary SNP eQTL	0.0107399	0.0328592	0.550268	0.952383	0.990802
ENSG00000204536.9	CCHCR1	HLA-A	A.02_06_01_01	Yes	conditional on the lead primary SNP eQTL	0.0107399	0.0325901	0.593717	0.956225	0.991657
ENSG00000204576.7	PRR3	HLA-A	A.02_06_01_01	Yes	conditional on the lead primary SNP eQTL	0.0107399	0.0230637	0.426833	0.956908	0.991951
ENSG00000204257.10	HLA-DMA	HLA-A	A.02_06_01_01	Yes	conditional on the lead primary SNP eQTL	0.0107399	-0.0303561	0.753831	0.967879	0.994243
ENSG00000204308.6	RNF5	HLA-A	A.02_06_01_01	Yes	conditional on the lead primary and conditional 1 SNP eQTL	0.0107399	-0.022743	0.574707	0.968433	0.994243
ENSG00000241106.2	HLA-DOB	HLA-A	A.02_06_01_01	Yes	primary	0.0107399	-0.0170164	0.60293	0.977484	0.996036
ENSG00000198502.5	HLA-DRB5	HLA-A	A.02_06_01_01	Yes	primary	0.0107399	0.0107193	0.621581	0.986241	0.997819
ENSG00000272540.1	XXbac-BPG252P9.9	HLA-A	A.02_06_01_01	Yes	primary	0.0107399	-0.00279506	0.680405	0.996722	0.999515
ENSG00000204257.10	HLA-DMA	HLA-A	A.02_06_01_01	Yes	primary	0.0107399	-0.00072737	0.645412	0.999101	0.999728
ENSG00000204387.8	C6orf48	HLA-A	A.02_07_01	Yes	primary	0.0131265	-2.26989	0.654379	0.000522836	0.0255548
ENSG00000204590.8	GNL1	HLA-A	A.02_07_01	Yes	primary	0.0131265	2.25989	0.658019	0.00059389	0.0279027
ENSG00000204385.6	SLC44A4	HLA-A	A.02_07_01	Yes	primary	0.0131265	2.54418	0.758348	0.000793951	0.0343504
ENSG00000224557.3	HLA-DPB2	HLA-A	A.02_07_01	Yes	conditional on the lead primary and conditional 1 SNP eQTL	0.0131265	-2.46258	0.759107	0.00117845	0.0457504
ENSG00000224557.3	HLA-DPB2	HLA-A	A.02_07_01	Yes	conditional on the lead primary SNP eQTL	0.0131265	-2.45651	0.757833	0.00118907	0.0460708
ENSG00000224557.3	HLA-DPB2	HLA-A	A.02_07_01	Yes	primary	0.0131265	-2.84065	0.881602	0.00127237	0.0484073
ENSG00000204560.5	DHX16	HLA-A	A.02_07_01	Yes	primary	0.0131265	-2.41688	0.751538	0.00130032	0.0490147
ENSG00000204385.6	SLC44A4	HLA-A	A.02_07_01	Yes	conditional on the lead primary and conditional 1 SNP eQTL	0.0131265	2.17459	0.727573	0.00280047	0.0812999
ENSG00000204385.6	SLC44A4	HLA-A	A.02_07_01	Yes	conditional on the lead primary SNP eQTL	0.0131265	2.16148	0.728271	0.00299778	0.0847283
ENSG00000204642.9	HLA-F	HLA-A	A.02_07_01	Yes	primary	0.0131265	2.2427	0.826999	0.00669073	0.138938
ENSG00000204305.9	AGER	HLA-A	A.02_07_01	Yes	primary	0.0131265	-1.99434	0.782755	0.0108389	0.183943
ENSG00000204344.10	STK19	HLA-A	A.02_07_01	Yes	primary	0.0131265	2.07616	0.815864	0.0109361	0.184777
ENSG00000204642.9	HLA-F	HLA-A	A.02_07_01	Yes	conditional on the lead primary SNP eQTL	0.0131265	1.98094	0.783872	0.0115003	0.189137
ENSG00000204574.8	ABCF1	HLA-A	A.02_07_01	Yes	primary	0.0131265	1.57061	0.622168	0.0115892	0.190215
ENSG00000204644.5	ZFP57	HLA-A	A.02_07_01	Yes	conditional on the lead primary SNP eQTL	0.0131265	2.05109	0.851029	0.015947	0.228016
ENSG00000204315.3	FKBPL	HLA-A	A.02_07_01	Yes	primary	0.0131265	1.76712	0.739579	0.0168775	0.234893
ENSG00000204642.9	HLA-F	HLA-A	A.02_07_01	Yes	conditional on the lead primary, conditional 1 and conditional 2 SNP eQTL	0.0131265	1.82116	0.78315	0.0200488	0.255062
ENSG00000176998.3	HCG4	HLA-A	A.02_07_01	Yes	primary	0.0131265	1.97216	0.858932	0.0216724	0.264848
ENSG00000204314.6	PRRT1	HLA-A	A.02_07_01	Yes	primary	0.0131265	-1.89987	0.84425	0.0244256	0.280827
ENSG00000204644.5	ZFP57	HLA-A	A.02_07_01	Yes	conditional on the lead primary, conditional 1 and conditional 2 SNP eQTL	0.0131265	2.16001	0.965891	0.0253328	0.285328
ENSG00000204642.9	HLA-F	HLA-A	A.02_07_01	Yes	conditional on the lead primary and conditional 1 SNP eQTL	0.0131265	1.60712	0.718833	0.0253689	0.285521
ENSG00000204644.5	ZFP57	HLA-A	A.02_07_01	Yes	conditional on the lead primary and conditional 1 SNP eQTL	0.0131265	1.86583	0.895148	0.0371251	0.340636
ENSG00000204392.6	LSM2	HLA-A	A.02_07_01	Yes	primary	0.0131265	1.62819	0.821366	0.0474458	0.376899
ENSG00000234745.5	HLA-B	HLA-A	A.02_07_01	Yes	conditional on the lead primary SNP eQTL	0.0131265	-1.57028	0.810286	0.0526313	0.396225
ENSG00000241106.2	HLA-DOB	HLA-A	A.02_07_01	Yes	conditional on the lead primary SNP eQTL	0.0131265	1.56029	0.805433	0.0527196	0.396597
ENSG00000206337.6	HCP5	HLA-A	A.02_07_01	Yes	primary	0.0131265	1.68751	0.878683	0.0547946	0.402329
ENSG00000204287.9	HLA-DRA	HLA-A	A.02_07_01	Yes	conditional on the lead primary SNP eQTL	0.0131265	1.7168	0.894189	0.0548647	0.40241
ENSG00000204301.5	NOTCH4	HLA-A	A.02_07_01	Yes	primary	0.0131265	1.67064	0.870379	0.0549282	0.402648
ENSG00000234745.5	HLA-B	HLA-A	A.02_07_01	Yes	primary	0.0131265	-1.7566	0.926498	0.057965	0.410805
ENSG00000176998.3	HCG4	HLA-A	A.02_07_01	Yes	conditional on the lead primary SNP eQTL	0.0131265	1.49889	0.796941	0.0599984	0.416099
ENSG00000204428.8	LY6G5C	HLA-A	A.02_07_01	Yes	conditional on the lead primary SNP eQTL	0.0131265	-1.69094	0.906466	0.062122	0.421989
ENSG00000236603.1	RANP1	HLA-A	A.02_07_01	Yes	conditional on the lead primary SNP eQTL	0.0131265	0.957477	0.518552	0.0648281	0.42989
ENSG00000204574.8	ABCF1	HLA-A	A.02_07_01	Yes	conditional on the lead primary and conditional 1 SNP eQTL	0.0131265	1.12794	0.616429	0.0672806	0.435939
ENSG00000213676.6	ATF6B	HLA-A	A.02_07_01	Yes	primary	0.0131265	1.44139	0.799528	0.0714184	0.447413
ENSG00000236603.1	RANP1	HLA-A	A.02_07_01	Yes	primary	0.0131265	0.960714	0.533725	0.0718578	0.448667
ENSG00000214922.5	HLA-F-AS1	HLA-A	A.02_07_01	Yes	conditional on the lead primary, conditional 1 and conditional 2 SNP eQTL	0.0131265	1.34707	0.74874	0.0720005	0.449111
ENSG00000204308.6	RNF5	HLA-A	A.02_07_01	Yes	conditional on the lead primary and conditional 1 SNP eQTL	0.0131265	1.43632	0.801124	0.0729928	0.451705
ENSG00000204574.8	ABCF1	HLA-A	A.02_07_01	Yes	conditional on the lead primary SNP eQTL	0.0131265	1.11973	0.627466	0.0743391	0.455837
ENSG00000204444.6	APOM	HLA-A	A.02_07_01	Yes	primary	0.0131265	-1.35467	0.762211	0.0755198	0.458543
ENSG00000204644.5	ZFP57	HLA-A	A.02_07_01	Yes	primary	0.0131265	1.58999	0.897634	0.0765092	0.461126
ENSG00000213780.6	GTF2H4	HLA-A	A.02_07_01	Yes	conditional on the lead primary SNP eQTL	0.0131265	-1.33723	0.758802	0.07802	0.464845
ENSG00000204386.6	NEU1	HLA-A	A.02_07_01	Yes	primary	0.0131265	1.38976	0.789202	0.0782437	0.465331
ENSG00000204444.6	APOM	HLA-A	A.02_07_01	Yes	conditional on the lead primary, conditional 1 and conditional 2 SNP eQTL	0.0131265	-1.33682	0.791257	0.0911247	0.495343
ENSG00000204592.5	HLA-E	HLA-A	A.02_07_01	Yes	conditional on the lead primary SNP eQTL	0.0131265	-1.18313	0.714574	0.0977789	0.508234
ENSG00000272273.1	XXbac-BPG252P9.10	HLA-A	A.02_07_01	Yes	primary	0.0131265	-1.59087	0.961441	0.0979915	0.508574
ENSG00000255152.4	MSH5-SAPCD1	HLA-A	A.02_07_01	Yes	primary	0.0131265	-1.45598	0.882294	0.0988969	0.510191
ENSG00000204444.6	APOM	HLA-A	A.02_07_01	Yes	conditional on the lead primary SNP eQTL	0.0131265	-1.28984	0.784132	0.0999854	0.511405
ENSG00000137411.12	VARS2	HLA-A	A.02_07_01	Yes	primary	0.0131265	-1.19802	0.745238	0.107931	0.528027
ENSG00000263020.1	CSNK2B-LY6G5B-1181	HLA-A	A.02_07_01	Yes	primary	0.0131265	-1.44098	0.908153	0.112577	0.534895
ENSG00000137404.10	NRM	HLA-A	A.02_07_01	Yes	primary	0.0131265	1.22411	0.777618	0.115445	0.540032
ENSG00000204308.6	RNF5	HLA-A	A.02_07_01	Yes	primary	0.0131265	1.31309	0.846357	0.120791	0.548002
ENSG00000234745.5	HLA-B	HLA-A	A.02_07_01	Yes	conditional on the lead primary and conditional 1 SNP eQTL	0.0131265	-1.25262	0.808154	0.121147	0.548492
ENSG00000213780.6	GTF2H4	HLA-A	A.02_07_01	Yes	conditional on the lead primary, conditional 1 and conditional 2 SNP eQTL	0.0131265	-1.18236	0.763561	0.121508	0.549151
ENSG00000214922.5	HLA-F-AS1	HLA-A	A.02_07_01	Yes	conditional on the lead primary and conditional 1 SNP eQTL	0.0131265	1.14945	0.743883	0.122295	0.550282
ENSG00000196230.8	TUBB	HLA-A	A.02_07_01	Yes	primary	0.0131265	0.749292	0.486868	0.123803	0.552971
ENSG00000204531.11	POU5F1	HLA-A	A.02_07_01	Yes	primary	0.0131265	-0.752137	0.488716	0.123803	0.552971
ENSG00000204427.7	ABHD16A	HLA-A	A.02_07_01	Yes	primary	0.0131265	-1.24508	0.817092	0.12756	0.559647
ENSG00000204592.5	HLA-E	HLA-A	A.02_07_01	Yes	conditional on the lead primary and conditional 1 SNP eQTL	0.0131265	-1.08275	0.715747	0.130343	0.563446
ENSG00000227766.1	HCG4P5	HLA-A	A.02_07_01	Yes	primary	0.0131265	-1.40471	0.930928	0.131316	0.564964
ENSG00000204389.8	HSPA1A	HLA-A	A.02_07_01	Yes	conditional on the lead primary SNP eQTL	0.0131265	1.05882	0.718817	0.140751	0.577983
ENSG00000204257.10	HLA-DMA	HLA-A	A.02_07_01	Yes	conditional on the lead primary SNP eQTL	0.0131265	2.54145	1.72894	0.141578	0.579548
ENSG00000137331.11	IER3	HLA-A	A.02_07_01	Yes	primary	0.0131265	-0.943918	0.651861	0.147607	0.588348
ENSG00000204540.6	PSORS1C1	HLA-A	A.02_07_01	Yes	primary	0.0131265	-1.46587	1.01747	0.149668	0.591141
ENSG00000244731.3	C4A	HLA-A	A.02_07_01	Yes	primary	0.0131265	-1.37156	0.95593	0.151347	0.5934
ENSG00000204389.8	HSPA1A	HLA-A	A.02_07_01	Yes	primary	0.0131265	1.15751	0.808439	0.152205	0.594712
ENSG00000204261.4	TAPSAR1	HLA-A	A.02_07_01	Yes	primary	0.0131265	1.35595	0.947544	0.152425	0.59507
ENSG00000204315.3	FKBPL	HLA-A	A.02_07_01	Yes	conditional on the lead primary SNP eQTL	0.0131265	1.01089	0.707101	0.152824	0.595147
ENSG00000270604.1	HCG17	HLA-A	A.02_07_01	Yes	primary	0.0131265	1.39846	0.986389	0.156261	0.599469
ENSG00000230795.2	HLA-K	HLA-A	A.02_07_01	Yes	conditional on the lead primary and conditional 1 SNP eQTL	0.0131265	-1.1157	0.793007	0.159451	0.603362
ENSG00000204396.6	VWA7	HLA-A	A.02_07_01	Yes	primary	0.0131265	1.38601	0.993596	0.163034	0.607972
ENSG00000204516.5	MICB	HLA-A	A.02_07_01	Yes	primary	0.0131265	-1.01477	0.727972	0.163325	0.608478
ENSG00000272221.1	XXbac-BPG181B23.7	HLA-A	A.02_07_01	Yes	primary	0.0131265	-1.35741	0.980339	0.166165	0.611962
ENSG00000240053.8	LY6G5B	HLA-A	A.02_07_01	Yes	primary	0.0131265	-0.877154	0.654231	0.180005	0.63089
ENSG00000204257.10	HLA-DMA	HLA-A	A.02_07_01	Yes	conditional on the lead primary and conditional 1 SNP eQTL	0.0131265	2.44521	1.82562	0.180445	0.631662
ENSG00000243753.1	HLA-L	HLA-A	A.02_07_01	Yes	conditional on the lead primary, conditional 1 and conditional 2 SNP eQTL	0.0131265	1.20395	0.901803	0.181861	0.633621
ENSG00000168394.9	TAP1	HLA-A	A.02_07_01	Yes	conditional on the lead primary and conditional 1 SNP eQTL	0.0131265	1.1275	0.845467	0.182339	0.634185
ENSG00000204287.9	HLA-DRA	HLA-A	A.02_07_01	Yes	primary	0.0131265	1.25285	0.959898	0.191827	0.645209
ENSG00000272221.1	XXbac-BPG181B23.7	HLA-A	A.02_07_01	Yes	conditional on the lead primary SNP eQTL	0.0131265	-1.17067	0.903901	0.195276	0.649368
ENSG00000204619.3	PPP1R11	HLA-A	A.02_07_01	Yes	primary	0.0131265	-1.14129	0.88391	0.196638	0.650478
ENSG00000168477.13	TNXB	HLA-A	A.02_07_01	Yes	conditional on the lead primary SNP eQTL	0.0131265	-1.13563	0.886506	0.200186	0.654197
ENSG00000168477.13	TNXB	HLA-A	A.02_07_01	Yes	conditional on the lead primary, conditional 1 and conditional 2 SNP eQTL	0.0131265	-1.13652	0.893012	0.203132	0.657888
ENSG00000224389.4	C4B	HLA-A	A.02_07_01	Yes	conditional on the lead primary SNP eQTL	0.0131265	-1.15686	0.918733	0.207961	0.662654
ENSG00000214922.5	HLA-F-AS1	HLA-A	A.02_07_01	Yes	primary	0.0131265	1.0473	0.842012	0.213569	0.667641
ENSG00000066379.10	ZNRD1	HLA-A	A.02_07_01	Yes	conditional on the lead primary SNP eQTL	0.0131265	-0.980634	0.790649	0.214868	0.668746
ENSG00000204308.6	RNF5	HLA-A	A.02_07_01	Yes	conditional on the lead primary SNP eQTL	0.0131265	0.972401	0.78605	0.21606	0.670274
ENSG00000204315.3	FKBPL	HLA-A	A.02_07_01	Yes	conditional on the lead primary and conditional 1 SNP eQTL	0.0131265	0.844988	0.701656	0.228483	0.681413
ENSG00000204315.3	FKBPL	HLA-A	A.02_07_01	Yes	conditional on the lead primary, conditional 1 and conditional 2 SNP eQTL	0.0131265	0.832844	0.69181	0.228642	0.681565
ENSG00000204576.7	PRR3	HLA-A	A.02_07_01	Yes	primary	0.0131265	-0.875431	0.728632	0.229568	0.682291
ENSG00000250535.1	STK19P	HLA-A	A.02_07_01	Yes	primary	0.0131265	-1.07448	0.897176	0.231065	0.683771
ENSG00000204469.8	PRRC2A	HLA-A	A.02_07_01	Yes	primary	0.0131265	0.87744	0.73362	0.23168	0.684193
ENSG00000204428.8	LY6G5C	HLA-A	A.02_07_01	Yes	primary	0.0131265	-1.10659	0.935283	0.236747	0.689013
ENSG00000242574.4	HLA-DMB	HLA-A	A.02_07_01	Yes	primary	0.0131265	1.08131	0.916574	0.238108	0.690171
ENSG00000213722.4	DDAH2	HLA-A	A.02_07_01	Yes	primary	0.0131265	0.766229	0.650098	0.238543	0.690543
ENSG00000204576.7	PRR3	HLA-A	A.02_07_01	Yes	conditional on the lead primary, conditional 1 and conditional 2 SNP eQTL	0.0131265	0.901004	0.772525	0.243489	0.695726
ENSG00000241106.2	HLA-DOB	HLA-A	A.02_07_01	Yes	primary	0.0131265	1.02728	0.88259	0.244449	0.696871
ENSG00000227766.1	HCG4P5	HLA-A	A.02_07_01	Yes	conditional on the lead primary and conditional 1 SNP eQTL	0.0131265	-1.05019	0.909901	0.248424	0.700315
ENSG00000224389.4	C4B	HLA-A	A.02_07_01	Yes	primary	0.0131265	-1.07677	0.942369	0.253198	0.704668
ENSG00000239257.1	RPL23AP1	HLA-A	A.02_07_01	Yes	primary	0.0131265	-1.09654	0.961614	0.254156	0.705562
ENSG00000204304.7	PBX2	HLA-A	A.02_07_01	Yes	primary	0.0131265	0.846956	0.743316	0.254524	0.706002
ENSG00000234745.5	HLA-B	HLA-A	A.02_07_01	Yes	conditional on the lead primary, conditional 1 and conditional 2 SNP eQTL	0.0131265	-0.921919	0.809705	0.254876	0.706426
ENSG00000270604.1	HCG17	HLA-A	A.02_07_01	Yes	conditional on the lead primary SNP eQTL	0.0131265	1.10288	0.973644	0.257328	0.708954
ENSG00000272221.1	XXbac-BPG181B23.7	HLA-A	A.02_07_01	Yes	conditional on the lead primary and conditional 1 SNP eQTL	0.0131265	-1.00591	0.890808	0.258808	0.70995
ENSG00000227766.1	HCG4P5	HLA-A	A.02_07_01	Yes	conditional on the lead primary SNP eQTL	0.0131265	-0.982393	0.873505	0.260735	0.712181
ENSG00000214922.5	HLA-F-AS1	HLA-A	A.02_07_01	Yes	conditional on the lead primary SNP eQTL	0.0131265	0.865221	0.777742	0.265932	0.716242
ENSG00000204396.6	VWA7	HLA-A	A.02_07_01	Yes	conditional on the lead primary SNP eQTL	0.0131265	1.05706	0.96779	0.274725	0.722439
ENSG00000204389.8	HSPA1A	HLA-A	A.02_07_01	Yes	conditional on the lead primary, conditional 1 and conditional 2 SNP eQTL	0.0131265	0.901528	0.829649	0.277197	0.724606
ENSG00000242574.4	HLA-DMB	HLA-A	A.02_07_01	Yes	conditional on the lead primary, conditional 1 and conditional 2 SNP eQTL	0.0131265	0.920923	0.883925	0.297478	0.742305
ENSG00000204482.6	LST1	HLA-A	A.02_07_01	Yes	conditional on the lead primary SNP eQTL	0.0131265	-1.0101	0.972775	0.299099	0.743637
ENSG00000204569.5	PPP1R10	HLA-A	A.02_07_01	Yes	primary	0.0131265	-0.956971	0.947149	0.312318	0.751461
ENSG00000204525.10	HLA-C	HLA-A	A.02_07_01	Yes	primary	0.0131265	-0.81051	0.804859	0.313924	0.752583
ENSG00000241370.1	RPP21	HLA-A	A.02_07_01	Yes	primary	0.0131265	0.815189	0.813413	0.316255	0.754225
ENSG00000204498.6	NFKBIL1	HLA-A	A.02_07_01	Yes	primary	0.0131265	0.699269	0.699531	0.317492	0.755172
ENSG00000227939.1	RPL3P2	HLA-A	A.02_07_01	Yes	primary	0.0131265	0.836891	0.840406	0.319339	0.756562
ENSG00000243753.1	HLA-L	HLA-A	A.02_07_01	Yes	conditional on the lead primary SNP eQTL	0.0131265	0.861618	0.882521	0.328909	0.763684
ENSG00000168394.9	TAP1	HLA-A	A.02_07_01	Yes	conditional on the lead primary SNP eQTL	0.0131265	0.766145	0.795947	0.33577	0.768755
ENSG00000204348.5	DXO	HLA-A	A.02_07_01	Yes	primary	0.0131265	-0.754541	0.797444	0.344047	0.77404
ENSG00000235663.1	SAPCD1-AS1	HLA-A	A.02_07_01	Yes	primary	0.0131265	0.936988	1.00674	0.352001	0.779024
ENSG00000204576.7	PRR3	HLA-A	A.02_07_01	Yes	conditional on the lead primary SNP eQTL	0.0131265	0.741157	0.796608	0.352169	0.779098
ENSG00000237923.1	XXbac-BPG27H4.8	HLA-A	A.02_07_01	Yes	primary	0.0131265	0.623417	0.704682	0.37633	0.794588
ENSG00000166278.10	C2	HLA-A	A.02_07_01	Yes	primary	0.0131265	0.829819	0.938153	0.376414	0.794608
ENSG00000230313.1	HCG24	HLA-A	A.02_07_01	Yes	conditional on the lead primary and conditional 1 SNP eQTL	0.0131265	0.84459	0.972448	0.38511	0.800368
ENSG00000066379.10	ZNRD1	HLA-A	A.02_07_01	Yes	primary	0.0131265	-0.727705	0.844372	0.388781	0.802963
ENSG00000204472.8	AIF1	HLA-A	A.02_07_01	Yes	primary	0.0131265	0.676543	0.808699	0.402828	0.811458
ENSG00000168394.9	TAP1	HLA-A	A.02_07_01	Yes	primary	0.0131265	0.737504	0.894345	0.409581	0.815262
ENSG00000204592.5	HLA-E	HLA-A	A.02_07_01	Yes	primary	0.0131265	-0.611136	0.744778	0.411896	0.816973
ENSG00000204632.7	HLA-G	HLA-A	A.02_07_01	Yes	primary	0.0131265	0.747539	0.914514	0.41369	0.817966
ENSG00000213780.6	GTF2H4	HLA-A	A.02_07_01	Yes	primary	0.0131265	-0.687069	0.846413	0.41694	0.819866
ENSG00000204310.6	AGPAT1	HLA-A	A.02_07_01	Yes	conditional on the lead primary SNP eQTL	0.0131265	-0.58834	0.762658	0.44045	0.833015
ENSG00000137343.13	ATAT1	HLA-A	A.02_07_01	Yes	primary	0.0131265	-0.577511	0.754091	0.443773	0.834627
ENSG00000237669.1	HCG4P3	HLA-A	A.02_07_01	Yes	primary	0.0131265	0.768254	1.00816	0.446037	0.835859
ENSG00000204439.3	C6orf47	HLA-A	A.02_07_01	Yes	primary	0.0131265	-0.568061	0.75448	0.4515	0.837809
ENSG00000204310.6	AGPAT1	HLA-A	A.02_07_01	Yes	primary	0.0131265	-0.600333	0.81542	0.461594	0.842642
ENSG00000223865.6	HLA-DPB1	HLA-A	A.02_07_01	Yes	conditional on the lead primary, conditional 1 and conditional 2 SNP eQTL	0.0131265	0.52411	0.712803	0.462169	0.843029
ENSG00000263756.1	XXbac-BPG181M17.6	HLA-A	A.02_07_01	Yes	primary	0.0131265	0.748029	1.02297	0.464637	0.843937
ENSG00000179344.12	HLA-DQB1	HLA-A	A.02_07_01	Yes	conditional on the lead primary SNP eQTL	0.0131265	0.587878	0.808223	0.466999	0.844973
ENSG00000204348.5	DXO	HLA-A	A.02_07_01	Yes	conditional on the lead primary SNP eQTL	0.0131265	-0.532087	0.742412	0.473559	0.848176
ENSG00000204310.6	AGPAT1	HLA-A	A.02_07_01	Yes	conditional on the lead primary, conditional 1 and conditional 2 SNP eQTL	0.0131265	-0.558379	0.796645	0.483357	0.852953
ENSG00000228415.2	PTMAP1	HLA-A	A.02_07_01	Yes	conditional on the lead primary SNP eQTL	0.0131265	-0.622419	0.906686	0.492412	0.856889
ENSG00000242574.4	HLA-DMB	HLA-A	A.02_07_01	Yes	conditional on the lead primary SNP eQTL	0.0131265	0.585356	0.863405	0.497796	0.859431
ENSG00000230622.1	UQCRHP1	HLA-A	A.02_07_01	Yes	primary	0.0131265	0.677123	1.02715	0.509752	0.86472
ENSG00000204538.3	PSORS1C2	HLA-A	A.02_07_01	Yes	primary	0.0131265	-0.561523	0.865937	0.516689	0.868005
ENSG00000204366.3	ZBTB12	HLA-A	A.02_07_01	Yes	primary	0.0131265	0.383234	0.591208	0.516842	0.868005
ENSG00000206341.6	HLA-H	HLA-A	A.02_07_01	Yes	primary	0.0131265	-0.608607	0.946772	0.520339	0.869342
ENSG00000204310.6	AGPAT1	HLA-A	A.02_07_01	Yes	conditional on the lead primary and conditional 1 SNP eQTL	0.0131265	-0.502482	0.786755	0.523034	0.870658
ENSG00000204304.7	PBX2	HLA-A	A.02_07_01	Yes	conditional on the lead primary SNP eQTL	0.0131265	0.443095	0.699655	0.526534	0.872321
ENSG00000204264.4	PSMB8	HLA-A	A.02_07_01	Yes	primary	0.0131265	0.443241	0.708348	0.531486	0.874489
ENSG00000213654.5	GPSM3	HLA-A	A.02_07_01	Yes	primary	0.0131265	-0.471528	0.764518	0.537389	0.877071
ENSG00000196126.6	HLA-DRB1	HLA-A	A.02_07_01	Yes	primary	0.0131265	0.561434	0.925028	0.543893	0.8795
ENSG00000204463.8	BAG6	HLA-A	A.02_07_01	Yes	primary	0.0131265	0.443696	0.760342	0.559525	0.887367
ENSG00000258388.3	PPT2-EGFL8	HLA-A	A.02_07_01	Yes	primary	0.0131265	-0.590394	1.02143	0.563259	0.888473
ENSG00000223865.6	HLA-DPB1	HLA-A	A.02_07_01	Yes	conditional on the lead primary and conditional 1 SNP eQTL	0.0131265	0.394924	0.687215	0.565513	0.889178
ENSG00000198502.5	HLA-DRB5	HLA-A	A.02_07_01	Yes	primary	0.0131265	-0.517972	0.915687	0.571621	0.891652
ENSG00000230795.2	HLA-K	HLA-A	A.02_07_01	Yes	conditional on the lead primary SNP eQTL	0.0131265	-0.460488	0.817945	0.573447	0.892621
ENSG00000204435.9	CSNK2B	HLA-A	A.02_07_01	Yes	primary	0.0131265	0.426949	0.760467	0.574505	0.893244
ENSG00000204623.4	ZNRD1-AS1	HLA-A	A.02_07_01	Yes	primary	0.0131265	0.461977	0.839229	0.581992	0.895861
ENSG00000240053.8	LY6G5B	HLA-A	A.02_07_01	Yes	conditional on the lead primary SNP eQTL	0.0131265	-0.35238	0.641307	0.582682	0.896234
ENSG00000204388.5	HSPA1B	HLA-A	A.02_07_01	Yes	primary	0.0131265	0.457479	0.851668	0.59116	0.899538
ENSG00000204568.7	MRPS18B	HLA-A	A.02_07_01	Yes	primary	0.0131265	-0.438117	0.816406	0.591515	0.899772
ENSG00000219797.2	PPIAP9	HLA-A	A.02_07_01	Yes	conditional on the lead primary SNP eQTL	0.0131265	0.526924	0.98804	0.593824	0.900806
ENSG00000204482.6	LST1	HLA-A	A.02_07_01	Yes	primary	0.0131265	-0.535767	1.00659	0.594546	0.901077
ENSG00000196735.7	HLA-DQA1	HLA-A	A.02_07_01	Yes	primary	0.0131265	-0.504939	0.967176	0.601618	0.903988
ENSG00000221988.8	PPT2	HLA-A	A.02_07_01	Yes	primary	0.0131265	0.421912	0.811501	0.603122	0.904438
ENSG00000206341.6	HLA-H	HLA-A	A.02_07_01	Yes	conditional on the lead primary, conditional 1 and conditional 2 SNP eQTL	0.0131265	-0.476407	0.939637	0.612147	0.907893
ENSG00000224328.1	MDC1-AS1	HLA-A	A.02_07_01	Yes	primary	0.0131265	0.503703	1.01274	0.61893	0.910671
ENSG00000204536.9	CCHCR1	HLA-A	A.02_07_01	Yes	primary	0.0131265	-0.440784	0.936152	0.63775	0.917335
ENSG00000204564.7	C6orf136	HLA-A	A.02_07_01	Yes	primary	0.0131265	-0.442905	0.946225	0.639731	0.917948
ENSG00000198563.9	DDX39B	HLA-A	A.02_07_01	Yes	conditional on the lead primary and conditional 1 SNP eQTL	0.0131265	-2.328e-17	5.01313e-17	0.642374	0.918822
ENSG00000219797.2	PPIAP9	HLA-A	A.02_07_01	Yes	primary	0.0131265	0.452789	1.00722	0.653041	0.92259
ENSG00000213719.4	CLIC1	HLA-A	A.02_07_01	Yes	primary	0.0131265	0.293961	0.657776	0.654946	0.923144
ENSG00000234127.4	TRIM26	HLA-A	A.02_07_01	Yes	conditional on the lead primary SNP eQTL	0.0131265	-0.289097	0.660113	0.661422	0.925076
ENSG00000198563.9	DDX39B	HLA-A	A.02_07_01	Yes	primary	0.0131265	0.106015	0.247382	0.668252	0.927144
ENSG00000228727.4	SAPCD1	HLA-A	A.02_07_01	Yes	primary	0.0131265	0.282565	0.680713	0.678067	0.929237
ENSG00000137310.7	TCF19	HLA-A	A.02_07_01	Yes	conditional on the lead primary SNP eQTL	0.0131265	0.295762	0.712649	0.678129	0.929243
ENSG00000230313.1	HCG24	HLA-A	A.02_07_01	Yes	conditional on the lead primary SNP eQTL	0.0131265	0.357626	0.863819	0.67887	0.929596
ENSG00000204520.8	MICA	HLA-A	A.02_07_01	Yes	conditional on the lead primary, conditional 1 and conditional 2 SNP eQTL	0.0131265	0.324123	0.824779	0.694333	0.934246
ENSG00000198563.9	DDX39B	HLA-A	A.02_07_01	Yes	conditional on the lead primary SNP eQTL	0.0131265	0.0926726	0.236725	0.695444	0.934725
ENSG00000204387.8	C6orf48	HLA-A	A.02_07_01	Yes	conditional on the lead primary SNP eQTL	0.0131265	-0.265453	0.693602	0.70193	0.936896
ENSG00000168477.13	TNXB	HLA-A	A.02_07_01	Yes	primary	0.0131265	-0.306204	0.812847	0.706392	0.938041
ENSG00000204472.8	AIF1	HLA-A	A.02_07_01	Yes	conditional on the lead primary SNP eQTL	0.0131265	0.289545	0.771422	0.707408	0.938447
ENSG00000204438.6	GPANK1	HLA-A	A.02_07_01	Yes	primary	0.0131265	0.310038	0.828708	0.708313	0.938599
ENSG00000235781.1	XXbac-BPG249D20.9	HLA-A	A.02_07_01	Yes	primary	0.0131265	0.383491	1.03035	0.709747	0.93905
ENSG00000137310.7	TCF19	HLA-A	A.02_07_01	Yes	conditional on the lead primary and conditional 1 SNP eQTL	0.0131265	0.256981	0.71295	0.718513	0.941836
ENSG00000204472.8	AIF1	HLA-A	A.02_07_01	Yes	conditional on the lead primary, conditional 1 and conditional 2 SNP eQTL	0.0131265	0.276801	0.77147	0.719747	0.942283
ENSG00000204410.10	MSH5	HLA-A	A.02_07_01	Yes	primary	0.0131265	-0.258996	0.732794	0.723762	0.943194
ENSG00000223865.6	HLA-DPB1	HLA-A	A.02_07_01	Yes	conditional on the lead primary SNP eQTL	0.0131265	-0.24447	0.691773	0.723791	0.9432
ENSG00000272540.1	XXbac-BPG252P9.9	HLA-A	A.02_07_01	Yes	primary	0.0131265	0.345988	0.994983	0.728041	0.944656
ENSG00000204421.2	LY6G6C	HLA-A	A.02_07_01	Yes	primary	0.0131265	-0.331225	1.01715	0.744697	0.949627
ENSG00000254870.1	ATP6V1G2-DDX39B	HLA-A	A.02_07_01	Yes	conditional on the lead primary, conditional 1 and conditional 2 SNP eQTL	0.0131265	-0.220602	0.686163	0.747831	0.950225
ENSG00000204351.7	SKIV2L	HLA-A	A.02_07_01	Yes	primary	0.0131265	-0.297209	0.927583	0.748656	0.950368
ENSG00000204257.10	HLA-DMA	HLA-A	A.02_07_01	Yes	primary	0.0131265	0.295816	0.937355	0.752317	0.951262
ENSG00000204463.8	BAG6	HLA-A	A.02_07_01	Yes	conditional on the lead primary SNP eQTL	0.0131265	0.22687	0.750942	0.762566	0.953457
ENSG00000204256.8	BRD2	HLA-A	A.02_07_01	Yes	conditional on the lead primary SNP eQTL	0.0131265	-0.216803	0.726793	0.765473	0.953838
ENSG00000230313.1	HCG24	HLA-A	A.02_07_01	Yes	primary	0.0131265	0.277453	0.93234	0.766017	0.953838
ENSG00000228415.2	PTMAP1	HLA-A	A.02_07_01	Yes	primary	0.0131265	-0.276537	0.931138	0.766476	0.954008
ENSG00000204599.10	TRIM39	HLA-A	A.02_07_01	Yes	primary	0.0131265	-0.174078	0.589006	0.767578	0.954262
ENSG00000243753.1	HLA-L	HLA-A	A.02_07_01	Yes	primary	0.0131265	0.262432	0.914765	0.774201	0.955424
ENSG00000241106.2	HLA-DOB	HLA-A	A.02_07_01	Yes	conditional on the lead primary and conditional 1 SNP eQTL	0.0131265	-0.258366	0.906735	0.77569	0.955701
ENSG00000206344.6	HCG27	HLA-A	A.02_07_01	Yes	primary	0.0131265	-0.277518	1.00426	0.782286	0.957415
ENSG00000137312.10	FLOT1	HLA-A	A.02_07_01	Yes	primary	0.0131265	-0.210907	0.763803	0.78245	0.957429
ENSG00000204520.8	MICA	HLA-A	A.02_07_01	Yes	primary	0.0131265	0.226906	0.840643	0.787222	0.958557
ENSG00000227507.2	LTB	HLA-A	A.02_07_01	Yes	conditional on the lead primary, conditional 1 and conditional 2 SNP eQTL	0.0131265	-0.179369	0.698956	0.797469	0.960928
ENSG00000204356.7	NELFE	HLA-A	A.02_07_01	Yes	primary	0.0131265	-0.211582	0.82473	0.797528	0.960928
ENSG00000231389.3	HLA-DPA1	HLA-A	A.02_07_01	Yes	primary	0.0131265	0.211389	0.828634	0.798642	0.961273
ENSG00000206341.6	HLA-H	HLA-A	A.02_07_01	Yes	conditional on the lead primary SNP eQTL	0.0131265	-0.20217	0.795236	0.799321	0.961375
ENSG00000204525.10	HLA-C	HLA-A	A.02_07_01	Yes	conditional on the lead primary SNP eQTL	0.0131265	-0.188088	0.746208	0.800996	0.961611
ENSG00000204618.4	RNF39	HLA-A	A.02_07_01	Yes	primary	0.0131265	-0.222168	0.897321	0.804452	0.962463
ENSG00000206341.6	HLA-H	HLA-A	A.02_07_01	Yes	conditional on the lead primary and conditional 1 SNP eQTL	0.0131265	-0.189605	0.796116	0.811755	0.964155
ENSG00000204525.10	HLA-C	HLA-A	A.02_07_01	Yes	conditional on the lead primary and conditional 1 SNP eQTL	0.0131265	-0.173393	0.743942	0.815705	0.964731
ENSG00000204599.10	TRIM39	HLA-A	A.02_07_01	Yes	conditional on the lead primary SNP eQTL	0.0131265	-0.127523	0.553544	0.817799	0.965367
ENSG00000237669.1	HCG4P3	HLA-A	A.02_07_01	Yes	conditional on the lead primary SNP eQTL	0.0131265	0.210764	0.930957	0.820894	0.966059
ENSG00000204475.5	NCR3	HLA-A	A.02_07_01	Yes	primary	0.0131265	-0.198666	0.933603	0.831487	0.96892
ENSG00000230795.2	HLA-K	HLA-A	A.02_07_01	Yes	primary	0.0131265	-0.181626	0.896254	0.839409	0.970392
ENSG00000204463.8	BAG6	HLA-A	A.02_07_01	Yes	conditional on the lead primary and conditional 1 SNP eQTL	0.0131265	0.149115	0.746715	0.841719	0.970935
ENSG00000204538.3	PSORS1C2	HLA-A	A.02_07_01	Yes	conditional on the lead primary and conditional 1 SNP eQTL	0.0131265	-0.159968	0.841263	0.84919	0.972447
ENSG00000237669.1	HCG4P3	HLA-A	A.02_07_01	Yes	conditional on the lead primary, conditional 1 and conditional 2 SNP eQTL	0.0131265	0.172158	0.93237	0.853507	0.972752
ENSG00000206344.6	HCG27	HLA-A	A.02_07_01	Yes	conditional on the lead primary SNP eQTL	0.0131265	-0.200855	1.09996	0.855111	0.972955
ENSG00000204371.7	EHMT2	HLA-A	A.02_07_01	Yes	primary	0.0131265	0.127568	0.71065	0.857538	0.973263
ENSG00000146112.7	PPP1R18	HLA-A	A.02_07_01	Yes	primary	0.0131265	-0.124115	0.705417	0.860337	0.973832
ENSG00000223865.6	HLA-DPB1	HLA-A	A.02_07_01	Yes	primary	0.0131265	-0.140956	0.821556	0.863774	0.974323
ENSG00000213676.6	ATF6B	HLA-A	A.02_07_01	Yes	conditional on the lead primary SNP eQTL	0.0131265	-0.12524	0.748618	0.867138	0.975488
ENSG00000204580.7	DDR1	HLA-A	A.02_07_01	Yes	primary	0.0131265	-0.101165	0.612876	0.868892	0.975847
ENSG00000227507.2	LTB	HLA-A	A.02_07_01	Yes	primary	0.0131265	-0.118454	0.725436	0.870293	0.976187
ENSG00000254870.1	ATP6V1G2-DDX39B	HLA-A	A.02_07_01	Yes	conditional on the lead primary SNP eQTL	0.0131265	0.101293	0.62573	0.871401	0.976241
ENSG00000204439.3	C6orf47	HLA-A	A.02_07_01	Yes	conditional on the lead primary SNP eQTL	0.0131265	-0.117368	0.745379	0.874882	0.977109
ENSG00000204394.8	VARS	HLA-A	A.02_07_01	Yes	primary	0.0131265	-0.101236	0.750435	0.892689	0.980919
ENSG00000204371.7	EHMT2	HLA-A	A.02_07_01	Yes	conditional on the lead primary, conditional 1 and conditional 2 SNP eQTL	0.0131265	0.0902251	0.671903	0.893179	0.980919
ENSG00000204371.7	EHMT2	HLA-A	A.02_07_01	Yes	conditional on the lead primary SNP eQTL	0.0131265	0.0865824	0.670734	0.89729	0.981374
ENSG00000228962.1	HCG23	HLA-A	A.02_07_01	Yes	conditional on the lead primary SNP eQTL	0.0131265	-0.108237	0.876705	0.901744	0.982139
ENSG00000204520.8	MICA	HLA-A	A.02_07_01	Yes	conditional on the lead primary SNP eQTL	0.0131265	-0.0864554	0.707242	0.902706	0.982139
ENSG00000234127.4	TRIM26	HLA-A	A.02_07_01	Yes	primary	0.0131265	0.0838675	0.698748	0.904463	0.982334
ENSG00000241404.2	EGFL8	HLA-A	A.02_07_01	Yes	primary	0.0131265	-0.106802	0.903806	0.905934	0.982452
ENSG00000204438.6	GPANK1	HLA-A	A.02_07_01	Yes	conditional on the lead primary, conditional 1 and conditional 2 SNP eQTL	0.0131265	0.0910949	0.811115	0.910579	0.983263
ENSG00000228962.1	HCG23	HLA-A	A.02_07_01	Yes	primary	0.0131265	0.10352	0.941719	0.912468	0.983389
ENSG00000229836.1	XXbac-BPG248L24.10	HLA-A	A.02_07_01	Yes	primary	0.0131265	-0.0999808	0.909559	0.912471	0.983389
ENSG00000231074.4	HCG18	HLA-A	A.02_07_01	Yes	primary	0.0131265	-0.0650961	0.614531	0.915639	0.984041
ENSG00000204538.3	PSORS1C2	HLA-A	A.02_07_01	Yes	conditional on the lead primary SNP eQTL	0.0131265	0.0811841	0.800391	0.919209	0.984448
ENSG00000240065.3	PSMB9	HLA-A	A.02_07_01	Yes	primary	0.0131265	0.0760969	0.796982	0.923933	0.985223
ENSG00000137312.10	FLOT1	HLA-A	A.02_07_01	Yes	conditional on the lead primary SNP eQTL	0.0131265	-0.0699551	0.74102	0.924788	0.985458
ENSG00000237042.1	MICG	HLA-A	A.02_07_01	Yes	primary	0.0131265	0.0648424	0.696398	0.925815	0.985688
ENSG00000213760.6	ATP6V1G2	HLA-A	A.02_07_01	Yes	primary	0.0131265	0.0787375	0.897976	0.930128	0.986156
ENSG00000213719.4	CLIC1	HLA-A	A.02_07_01	Yes	conditional on the lead primary and conditional 1 SNP eQTL	0.0131265	-0.0541092	0.645036	0.933147	0.986784
ENSG00000231074.4	HCG18	HLA-A	A.02_07_01	Yes	conditional on the lead primary, conditional 1 and conditional 2 SNP eQTL	0.0131265	-0.0493466	0.594418	0.933838	0.986917
ENSG00000204252.8	HLA-DOA	HLA-A	A.02_07_01	Yes	primary	0.0131265	-0.0649129	0.816384	0.936625	0.987687
ENSG00000200816.1	SNORA38	HLA-A	A.02_07_01	Yes	primary	0.0131265	-0.0641066	0.821507	0.9378	0.987772
ENSG00000204267.9	TAP2	HLA-A	A.02_07_01	Yes	primary	0.0131265	-0.067674	0.877462	0.938524	0.98796
ENSG00000204536.9	CCHCR1	HLA-A	A.02_07_01	Yes	conditional on the lead primary SNP eQTL	0.0131265	0.0665688	0.868458	0.938901	0.988041
ENSG00000204256.8	BRD2	HLA-A	A.02_07_01	Yes	primary	0.0131265	0.052427	0.747037	0.94405	0.989221
ENSG00000241404.2	EGFL8	HLA-A	A.02_07_01	Yes	conditional on the lead primary SNP eQTL	0.0131265	-0.0582817	0.875155	0.946903	0.989721
ENSG00000223837.2	BRD2-IT1	HLA-A	A.02_07_01	Yes	primary	0.0131265	0.0674841	1.02204	0.947355	0.989768
ENSG00000254870.1	ATP6V1G2-DDX39B	HLA-A	A.02_07_01	Yes	conditional on the lead primary and conditional 1 SNP eQTL	0.0131265	-0.0427986	0.662521	0.948493	0.989966
ENSG00000204390.8	HSPA1L	HLA-A	A.02_07_01	Yes	primary	0.0131265	-0.0602683	0.940918	0.948928	0.990126
ENSG00000179344.12	HLA-DQB1	HLA-A	A.02_07_01	Yes	primary	0.0131265	-0.0540026	0.878703	0.950995	0.990421
ENSG00000241404.2	EGFL8	HLA-A	A.02_07_01	Yes	conditional on the lead primary and conditional 1 SNP eQTL	0.0131265	-0.052644	0.876456	0.952104	0.990739
ENSG00000254870.1	ATP6V1G2-DDX39B	HLA-A	A.02_07_01	Yes	primary	0.0131265	0.0366566	0.707423	0.958674	0.992365
ENSG00000213719.4	CLIC1	HLA-A	A.02_07_01	Yes	conditional on the lead primary SNP eQTL	0.0131265	-0.0302727	0.637665	0.962135	0.992883
ENSG00000237669.1	HCG4P3	HLA-A	A.02_07_01	Yes	conditional on the lead primary and conditional 1 SNP eQTL	0.0131265	-0.0436568	0.926319	0.96241	0.993008
ENSG00000231074.4	HCG18	HLA-A	A.02_07_01	Yes	conditional on the lead primary SNP eQTL	0.0131265	-0.024194	0.597655	0.967709	0.994231
ENSG00000204520.8	MICA	HLA-A	A.02_07_01	Yes	conditional on the lead primary and conditional 1 SNP eQTL	0.0131265	0.0221553	0.802253	0.977968	0.9962
ENSG00000204438.6	GPANK1	HLA-A	A.02_07_01	Yes	conditional on the lead primary SNP eQTL	0.0131265	-0.0173419	0.78991	0.982484	0.997188
ENSG00000229836.1	XXbac-BPG248L24.10	HLA-A	A.02_07_01	Yes	conditional on the lead primary SNP eQTL	0.0131265	-0.0182171	0.882384	0.983529	0.997375
ENSG00000214894.2	LINC00243	HLA-A	A.02_07_01	Yes	primary	0.0131265	0.0182165	0.991836	0.985347	0.997607
ENSG00000244355.3	LY6G6D	HLA-A	A.02_07_01	Yes	primary	0.0131265	-0.0156533	0.979488	0.987249	0.998033
ENSG00000213676.6	ATF6B	HLA-A	A.02_07_01	Yes	conditional on the lead primary and conditional 1 SNP eQTL	0.0131265	0.0121649	0.788575	0.987692	0.998119
ENSG00000137337.10	MDC1	HLA-A	A.02_07_01	Yes	primary	0.0131265	-0.00417626	0.820465	0.995939	0.999388
ENSG00000137310.7	TCF19	HLA-A	A.02_07_01	Yes	primary	0.0131265	0.00347726	0.749569	0.996299	0.999427
ENSG00000214922.5	HLA-F-AS1	HLA-A	A.03_01_01_01	Yes	conditional on the lead primary SNP eQTL	0.103819	1.97979	0.20128	1.11022e-16	9.60126e-14
ENSG00000214922.5	HLA-F-AS1	HLA-A	A.03_01_01_01	Yes	conditional on the lead primary and conditional 1 SNP eQTL	0.103819	1.9553	0.211138	1.11022e-16	9.60126e-14
ENSG00000214922.5	HLA-F-AS1	HLA-A	A.03_01_01_01	Yes	conditional on the lead primary, conditional 1 and conditional 2 SNP eQTL	0.103819	2.00038	0.211452	1.11022e-16	9.60126e-14
ENSG00000214922.5	HLA-F-AS1	HLA-A	A.03_01_01_01	Yes	primary	0.103819	2.14036	0.155648	1.11022e-16	9.60126e-14
ENSG00000227766.1	HCG4P5	HLA-A	A.03_01_01_01	Yes	primary	0.103819	1.47742	0.203851	4.24327e-13	2.15713e-10
ENSG00000230795.2	HLA-K	HLA-A	A.03_01_01_01	Yes	conditional on the lead primary and conditional 1 SNP eQTL	0.103819	1.67642	0.270596	5.81838e-10	1.76518e-07
ENSG00000227766.1	HCG4P5	HLA-A	A.03_01_01_01	Yes	conditional on the lead primary and conditional 1 SNP eQTL	0.103819	1.2749	0.236083	6.65505e-08	1.31766e-05
ENSG00000230795.2	HLA-K	HLA-A	A.03_01_01_01	Yes	primary	0.103819	1.07953	0.214804	5.01719e-07	7.79924e-05
ENSG00000230795.2	HLA-K	HLA-A	A.03_01_01_01	Yes	conditional on the lead primary SNP eQTL	0.103819	0.921475	0.195724	2.50128e-06	0.000320828
ENSG00000204632.7	HLA-G	HLA-A	A.03_01_01_01	Yes	primary	0.103819	0.970796	0.207244	2.80907e-06	0.000352249
ENSG00000204618.4	RNF39	HLA-A	A.03_01_01_01	Yes	primary	0.103819	-0.914897	0.201294	5.49165e-06	0.000626032
ENSG00000206341.6	HLA-H	HLA-A	A.03_01_01_01	Yes	conditional on the lead primary, conditional 1 and conditional 2 SNP eQTL	0.103819	-0.93794	0.22804	3.90477e-05	0.00338854
ENSG00000213719.4	CLIC1	HLA-A	A.03_01_01_01	Yes	primary	0.103819	-0.515863	0.139836	0.000225087	0.0136794
ENSG00000241106.2	HLA-DOB	HLA-A	A.03_01_01_01	Yes	primary	0.103819	-0.731603	0.202406	0.000300885	0.0169066
ENSG00000206341.6	HLA-H	HLA-A	A.03_01_01_01	Yes	primary	0.103819	-0.820827	0.228541	0.000328662	0.0180759
ENSG00000206341.6	HLA-H	HLA-A	A.03_01_01_01	Yes	conditional on the lead primary and conditional 1 SNP eQTL	0.103819	-0.675717	0.192787	0.000456609	0.0232281
ENSG00000204301.5	NOTCH4	HLA-A	A.03_01_01_01	Yes	primary	0.103819	-0.646039	0.184513	0.000462953	0.0234557
ENSG00000206341.6	HLA-H	HLA-A	A.03_01_01_01	Yes	conditional on the lead primary SNP eQTL	0.103819	-0.654848	0.191741	0.000637193	0.0293937
ENSG00000241106.2	HLA-DOB	HLA-A	A.03_01_01_01	Yes	conditional on the lead primary SNP eQTL	0.103819	-0.624563	0.186058	0.000788459	0.034152
ENSG00000176998.3	HCG4	HLA-A	A.03_01_01_01	Yes	primary	0.103819	0.671076	0.208075	0.00125897	0.0480831
ENSG00000239257.1	RPL23AP1	HLA-A	A.03_01_01_01	Yes	primary	0.103819	0.677284	0.21172	0.00137926	0.0511196
ENSG00000204538.3	PSORS1C2	HLA-A	A.03_01_01_01	Yes	conditional on the lead primary SNP eQTL	0.103819	-0.534957	0.181985	0.00328677	0.0897603
ENSG00000204463.8	BAG6	HLA-A	A.03_01_01_01	Yes	primary	0.103819	-0.497865	0.17438	0.00430279	0.106351
ENSG00000176998.3	HCG4	HLA-A	A.03_01_01_01	Yes	conditional on the lead primary SNP eQTL	0.103819	0.544199	0.192395	0.00467605	0.112043
ENSG00000204396.6	VWA7	HLA-A	A.03_01_01_01	Yes	conditional on the lead primary SNP eQTL	0.103819	-0.580066	0.207613	0.0052063	0.119466
ENSG00000237042.1	MICG	HLA-A	A.03_01_01_01	Yes	primary	0.103819	-0.420326	0.150745	0.00529822	0.120906
ENSG00000196126.6	HLA-DRB1	HLA-A	A.03_01_01_01	Yes	primary	0.103819	0.631255	0.229232	0.00589115	0.129488
ENSG00000204576.7	PRR3	HLA-A	A.03_01_01_01	Yes	conditional on the lead primary, conditional 1 and conditional 2 SNP eQTL	0.103819	0.557472	0.204228	0.00633991	0.13509
ENSG00000204644.5	ZFP57	HLA-A	A.03_01_01_01	Yes	primary	0.103819	-0.53734	0.199468	0.00706276	0.143827
ENSG00000204644.5	ZFP57	HLA-A	A.03_01_01_01	Yes	conditional on the lead primary and conditional 1 SNP eQTL	0.103819	-0.524982	0.196769	0.00763008	0.149902
ENSG00000204644.5	ZFP57	HLA-A	A.03_01_01_01	Yes	conditional on the lead primary, conditional 1 and conditional 2 SNP eQTL	0.103819	-0.792976	0.302516	0.00876022	0.161624
ENSG00000066379.10	ZNRD1	HLA-A	A.03_01_01_01	Yes	conditional on the lead primary SNP eQTL	0.103819	-0.437308	0.17001	0.0101041	0.177006
ENSG00000206337.6	HCP5	HLA-A	A.03_01_01_01	Yes	primary	0.103819	-0.483085	0.189471	0.0107831	0.18351
ENSG00000204261.4	TAPSAR1	HLA-A	A.03_01_01_01	Yes	primary	0.103819	-0.518739	0.206774	0.0121166	0.195503
ENSG00000204516.5	MICB	HLA-A	A.03_01_01_01	Yes	primary	0.103819	-0.419102	0.169497	0.0134127	0.206947
ENSG00000227507.2	LTB	HLA-A	A.03_01_01_01	Yes	conditional on the lead primary and conditional 1 SNP eQTL	0.103819	-0.540196	0.221157	0.0145824	0.216828
ENSG00000242574.4	HLA-DMB	HLA-A	A.03_01_01_01	Yes	primary	0.103819	-0.476839	0.205599	0.0203804	0.257149
ENSG00000204396.6	VWA7	HLA-A	A.03_01_01_01	Yes	primary	0.103819	-0.492834	0.21331	0.0208654	0.26008
ENSG00000204644.5	ZFP57	HLA-A	A.03_01_01_01	Yes	conditional on the lead primary SNP eQTL	0.103819	-0.424985	0.186902	0.0229756	0.272914
ENSG00000204574.8	ABCF1	HLA-A	A.03_01_01_01	Yes	conditional on the lead primary SNP eQTL	0.103819	-0.449623	0.200534	0.0249531	0.283342
ENSG00000204576.7	PRR3	HLA-A	A.03_01_01_01	Yes	conditional on the lead primary SNP eQTL	0.103819	0.445829	0.199613	0.0255184	0.286475
ENSG00000243753.1	HLA-L	HLA-A	A.03_01_01_01	Yes	conditional on the lead primary SNP eQTL	0.103819	-0.417972	0.188302	0.02644	0.290709
ENSG00000204580.7	DDR1	HLA-A	A.03_01_01_01	Yes	primary	0.103819	-0.301377	0.136741	0.0275248	0.296407
ENSG00000258388.3	PPT2-EGFL8	HLA-A	A.03_01_01_01	Yes	primary	0.103819	-0.465213	0.214122	0.0298061	0.3069
ENSG00000230313.1	HCG24	HLA-A	A.03_01_01_01	Yes	conditional on the lead primary and conditional 1 SNP eQTL	0.103819	-0.664552	0.309216	0.0316226	0.316281
ENSG00000214894.2	LINC00243	HLA-A	A.03_01_01_01	Yes	primary	0.103819	-0.447056	0.212803	0.0356588	0.334651
ENSG00000204538.3	PSORS1C2	HLA-A	A.03_01_01_01	Yes	primary	0.103819	-0.423118	0.201635	0.0358671	0.335184
ENSG00000204642.9	HLA-F	HLA-A	A.03_01_01_01	Yes	conditional on the lead primary SNP eQTL	0.103819	0.394057	0.191618	0.0397368	0.349737
ENSG00000204444.6	APOM	HLA-A	A.03_01_01_01	Yes	conditional on the lead primary SNP eQTL	0.103819	0.452182	0.221048	0.0407936	0.354075
ENSG00000204538.3	PSORS1C2	HLA-A	A.03_01_01_01	Yes	conditional on the lead primary and conditional 1 SNP eQTL	0.103819	-0.394119	0.194322	0.0425423	0.360237
ENSG00000204421.2	LY6G6C	HLA-A	A.03_01_01_01	Yes	primary	0.103819	-0.424798	0.211263	0.0443514	0.366712
ENSG00000200816.1	SNORA38	HLA-A	A.03_01_01_01	Yes	primary	0.103819	-0.347317	0.172768	0.0443989	0.366804
ENSG00000204385.6	SLC44A4	HLA-A	A.03_01_01_01	Yes	conditional on the lead primary and conditional 1 SNP eQTL	0.103819	-0.316544	0.161878	0.0505301	0.389086
ENSG00000242574.4	HLA-DMB	HLA-A	A.03_01_01_01	Yes	conditional on the lead primary SNP eQTL	0.103819	-0.376338	0.192495	0.0505765	0.389247
ENSG00000137411.12	VARS2	HLA-A	A.03_01_01_01	Yes	primary	0.103819	0.323986	0.166616	0.0518335	0.393801
ENSG00000204315.3	FKBPL	HLA-A	A.03_01_01_01	Yes	conditional on the lead primary SNP eQTL	0.103819	-0.317034	0.163339	0.0522635	0.394997
ENSG00000242574.4	HLA-DMB	HLA-A	A.03_01_01_01	Yes	conditional on the lead primary, conditional 1 and conditional 2 SNP eQTL	0.103819	-0.387325	0.201107	0.0541092	0.400366
ENSG00000166278.10	C2	HLA-A	A.03_01_01_01	Yes	primary	0.103819	-0.369776	0.195116	0.058071	0.411136
ENSG00000213780.6	GTF2H4	HLA-A	A.03_01_01_01	Yes	conditional on the lead primary, conditional 1 and conditional 2 SNP eQTL	0.103819	-0.306572	0.163056	0.0600863	0.416298
ENSG00000204385.6	SLC44A4	HLA-A	A.03_01_01_01	Yes	conditional on the lead primary SNP eQTL	0.103819	-0.302562	0.161425	0.0608859	0.419077
ENSG00000204444.6	APOM	HLA-A	A.03_01_01_01	Yes	conditional on the lead primary, conditional 1 and conditional 2 SNP eQTL	0.103819	0.417643	0.22309	0.061195	0.419598
ENSG00000263020.1	CSNK2B-LY6G5B-1181	HLA-A	A.03_01_01_01	Yes	primary	0.103819	-0.357619	0.191079	0.0612652	0.419768
ENSG00000243753.1	HLA-L	HLA-A	A.03_01_01_01	Yes	conditional on the lead primary, conditional 1 and conditional 2 SNP eQTL	0.103819	-0.358975	0.192133	0.0617118	0.421064
ENSG00000146112.7	PPP1R18	HLA-A	A.03_01_01_01	Yes	primary	0.103819	-0.278447	0.150017	0.0634388	0.425969
ENSG00000213780.6	GTF2H4	HLA-A	A.03_01_01_01	Yes	conditional on the lead primary SNP eQTL	0.103819	-0.303472	0.163992	0.0642376	0.428315
ENSG00000204574.8	ABCF1	HLA-A	A.03_01_01_01	Yes	conditional on the lead primary and conditional 1 SNP eQTL	0.103819	-0.251786	0.13859	0.0692532	0.44093
ENSG00000204308.6	RNF5	HLA-A	A.03_01_01_01	Yes	conditional on the lead primary and conditional 1 SNP eQTL	0.103819	0.330362	0.182786	0.0707047	0.445042
ENSG00000237669.1	HCG4P3	HLA-A	A.03_01_01_01	Yes	conditional on the lead primary SNP eQTL	0.103819	-0.365104	0.205427	0.0755204	0.458543
ENSG00000237669.1	HCG4P3	HLA-A	A.03_01_01_01	Yes	conditional on the lead primary, conditional 1 and conditional 2 SNP eQTL	0.103819	-0.360583	0.205374	0.079133	0.467638
ENSG00000204592.5	HLA-E	HLA-A	A.03_01_01_01	Yes	primary	0.103819	0.320204	0.18278	0.0797986	0.468871
ENSG00000204385.6	SLC44A4	HLA-A	A.03_01_01_01	Yes	primary	0.103819	-0.300676	0.17174	0.0799866	0.469389
ENSG00000204308.6	RNF5	HLA-A	A.03_01_01_01	Yes	primary	0.103819	0.345953	0.199964	0.0836161	0.477912
ENSG00000213719.4	CLIC1	HLA-A	A.03_01_01_01	Yes	conditional on the lead primary and conditional 1 SNP eQTL	0.103819	-0.266679	0.1544	0.0841323	0.479541
ENSG00000206344.6	HCG27	HLA-A	A.03_01_01_01	Yes	primary	0.103819	-0.362982	0.211549	0.0861935	0.484427
ENSG00000230313.1	HCG24	HLA-A	A.03_01_01_01	Yes	primary	0.103819	-0.361946	0.21162	0.0871993	0.486634
ENSG00000066379.10	ZNRD1	HLA-A	A.03_01_01_01	Yes	primary	0.103819	-0.307393	0.181764	0.0908042	0.494991
ENSG00000227507.2	LTB	HLA-A	A.03_01_01_01	Yes	primary	0.103819	-0.25427	0.1524	0.0952277	0.502595
ENSG00000204642.9	HLA-F	HLA-A	A.03_01_01_01	Yes	conditional on the lead primary and conditional 1 SNP eQTL	0.103819	0.35517	0.213621	0.0963882	0.505335
ENSG00000204257.10	HLA-DMA	HLA-A	A.03_01_01_01	Yes	primary	0.103819	-0.345117	0.209935	0.100192	0.511885
ENSG00000243753.1	HLA-L	HLA-A	A.03_01_01_01	Yes	primary	0.103819	-0.326454	0.199227	0.101297	0.514691
ENSG00000204428.8	LY6G5C	HLA-A	A.03_01_01_01	Yes	conditional on the lead primary SNP eQTL	0.103819	-0.310521	0.190246	0.102636	0.517394
ENSG00000231074.4	HCG18	HLA-A	A.03_01_01_01	Yes	conditional on the lead primary, conditional 1 and conditional 2 SNP eQTL	0.103819	-0.204946	0.126233	0.104471	0.522229
ENSG00000230622.1	UQCRHP1	HLA-A	A.03_01_01_01	Yes	primary	0.103819	-0.346775	0.21378	0.10478	0.522982
ENSG00000204435.9	CSNK2B	HLA-A	A.03_01_01_01	Yes	primary	0.103819	-0.273637	0.168817	0.105036	0.523392
ENSG00000204482.6	LST1	HLA-A	A.03_01_01_01	Yes	primary	0.103819	-0.353952	0.219037	0.106106	0.524754
ENSG00000213760.6	ATP6V1G2	HLA-A	A.03_01_01_01	Yes	primary	0.103819	-0.341928	0.212188	0.107084	0.526721
ENSG00000198502.5	HLA-DRB5	HLA-A	A.03_01_01_01	Yes	primary	0.103819	0.357273	0.222241	0.107924	0.528027
ENSG00000254870.1	ATP6V1G2-DDX39B	HLA-A	A.03_01_01_01	Yes	conditional on the lead primary, conditional 1 and conditional 2 SNP eQTL	0.103819	0.258359	0.161033	0.108628	0.528892
ENSG00000204619.3	PPP1R11	HLA-A	A.03_01_01_01	Yes	primary	0.103819	0.306354	0.192197	0.110944	0.531738
ENSG00000204386.6	NEU1	HLA-A	A.03_01_01_01	Yes	primary	0.103819	-0.275712	0.17313	0.11127	0.532377
ENSG00000244731.3	C4A	HLA-A	A.03_01_01_01	Yes	primary	0.103819	-0.333568	0.210675	0.113347	0.536084
ENSG00000241404.2	EGFL8	HLA-A	A.03_01_01_01	Yes	primary	0.103819	-0.297193	0.188044	0.114005	0.537201
ENSG00000204315.3	FKBPL	HLA-A	A.03_01_01_01	Yes	primary	0.103819	-0.259656	0.166201	0.118216	0.544057
ENSG00000204257.10	HLA-DMA	HLA-A	A.03_01_01_01	Yes	conditional on the lead primary and conditional 1 SNP eQTL	0.103819	-0.386564	0.247504	0.118324	0.544213
ENSG00000204428.8	LY6G5C	HLA-A	A.03_01_01_01	Yes	primary	0.103819	-0.306907	0.199337	0.123649	0.552804
ENSG00000224328.1	MDC1-AS1	HLA-A	A.03_01_01_01	Yes	primary	0.103819	-0.331291	0.225118	0.14112	0.578518
ENSG00000204475.5	NCR3	HLA-A	A.03_01_01_01	Yes	primary	0.103819	-0.291461	0.198424	0.141866	0.57994
ENSG00000235663.1	SAPCD1-AS1	HLA-A	A.03_01_01_01	Yes	primary	0.103819	-0.322813	0.22167	0.145316	0.58523
ENSG00000213719.4	CLIC1	HLA-A	A.03_01_01_01	Yes	conditional on the lead primary SNP eQTL	0.103819	-0.217263	0.152342	0.153825	0.596491
ENSG00000168477.13	TNXB	HLA-A	A.03_01_01_01	Yes	primary	0.103819	-0.24924	0.178068	0.161607	0.605918
ENSG00000223865.6	HLA-DPB1	HLA-A	A.03_01_01_01	Yes	conditional on the lead primary, conditional 1 and conditional 2 SNP eQTL	0.103819	-0.252032	0.180293	0.162142	0.606788
ENSG00000231074.4	HCG18	HLA-A	A.03_01_01_01	Yes	conditional on the lead primary SNP eQTL	0.103819	-0.176412	0.126304	0.162497	0.607318
ENSG00000204536.9	CCHCR1	HLA-A	A.03_01_01_01	Yes	conditional on the lead primary SNP eQTL	0.103819	-0.262576	0.188786	0.164266	0.609966
ENSG00000204314.6	PRRT1	HLA-A	A.03_01_01_01	Yes	primary	0.103819	-0.25675	0.184772	0.164666	0.610479
ENSG00000234745.5	HLA-B	HLA-A	A.03_01_01_01	Yes	conditional on the lead primary and conditional 1 SNP eQTL	0.103819	0.275366	0.199051	0.166545	0.612709
ENSG00000254870.1	ATP6V1G2-DDX39B	HLA-A	A.03_01_01_01	Yes	primary	0.103819	0.217093	0.157165	0.167184	0.613342
ENSG00000254870.1	ATP6V1G2-DDX39B	HLA-A	A.03_01_01_01	Yes	conditional on the lead primary and conditional 1 SNP eQTL	0.103819	0.219979	0.160333	0.170059	0.617423
ENSG00000204308.6	RNF5	HLA-A	A.03_01_01_01	Yes	conditional on the lead primary SNP eQTL	0.103819	0.243617	0.182623	0.182208	0.634059
ENSG00000228962.1	HCG23	HLA-A	A.03_01_01_01	Yes	conditional on the lead primary SNP eQTL	0.103819	-0.250044	0.187479	0.182297	0.634183
ENSG00000241404.2	EGFL8	HLA-A	A.03_01_01_01	Yes	conditional on the lead primary SNP eQTL	0.103819	-0.237793	0.182586	0.192793	0.645974
ENSG00000234127.4	TRIM26	HLA-A	A.03_01_01_01	Yes	conditional on the lead primary SNP eQTL	0.103819	-0.183916	0.141399	0.193365	0.646571
ENSG00000223865.6	HLA-DPB1	HLA-A	A.03_01_01_01	Yes	conditional on the lead primary SNP eQTL	0.103819	-0.222302	0.171334	0.194466	0.648118
ENSG00000168394.9	TAP1	HLA-A	A.03_01_01_01	Yes	conditional on the lead primary SNP eQTL	0.103819	-0.249493	0.19276	0.195555	0.649645
ENSG00000204390.8	HSPA1L	HLA-A	A.03_01_01_01	Yes	primary	0.103819	-0.266342	0.205917	0.195858	0.649688
ENSG00000241404.2	EGFL8	HLA-A	A.03_01_01_01	Yes	conditional on the lead primary and conditional 1 SNP eQTL	0.103819	-0.235932	0.183174	0.197738	0.651598
ENSG00000228962.1	HCG23	HLA-A	A.03_01_01_01	Yes	primary	0.103819	-0.270796	0.211804	0.201065	0.655239
ENSG00000204482.6	LST1	HLA-A	A.03_01_01_01	Yes	conditional on the lead primary SNP eQTL	0.103819	-0.266375	0.20988	0.204377	0.658964
ENSG00000213654.5	GPSM3	HLA-A	A.03_01_01_01	Yes	primary	0.103819	-0.20404	0.163229	0.211291	0.665456
ENSG00000224557.3	HLA-DPB2	HLA-A	A.03_01_01_01	Yes	conditional on the lead primary SNP eQTL	0.103819	0.223131	0.181215	0.218209	0.672346
ENSG00000224557.3	HLA-DPB2	HLA-A	A.03_01_01_01	Yes	conditional on the lead primary and conditional 1 SNP eQTL	0.103819	0.223265	0.181544	0.218768	0.672759
ENSG00000223865.6	HLA-DPB1	HLA-A	A.03_01_01_01	Yes	conditional on the lead primary and conditional 1 SNP eQTL	0.103819	-0.211368	0.173605	0.223406	0.677615
ENSG00000204599.10	TRIM39	HLA-A	A.03_01_01_01	Yes	primary	0.103819	-0.157673	0.130242	0.226044	0.679904
ENSG00000137312.10	FLOT1	HLA-A	A.03_01_01_01	Yes	primary	0.103819	-0.205476	0.171628	0.231221	0.683953
ENSG00000228727.4	SAPCD1	HLA-A	A.03_01_01_01	Yes	primary	0.103819	-0.180041	0.150614	0.231939	0.684526
ENSG00000224557.3	HLA-DPB2	HLA-A	A.03_01_01_01	Yes	primary	0.103819	0.253714	0.212752	0.233053	0.685707
ENSG00000250535.1	STK19P	HLA-A	A.03_01_01_01	Yes	primary	0.103819	-0.242698	0.204349	0.234965	0.687376
ENSG00000204642.9	HLA-F	HLA-A	A.03_01_01_01	Yes	conditional on the lead primary, conditional 1 and conditional 2 SNP eQTL	0.103819	0.251344	0.214577	0.24146	0.693838
ENSG00000230313.1	HCG24	HLA-A	A.03_01_01_01	Yes	conditional on the lead primary SNP eQTL	0.103819	-0.223235	0.193935	0.249699	0.701437
ENSG00000204560.5	DHX16	HLA-A	A.03_01_01_01	Yes	primary	0.103819	-0.181119	0.16089	0.260279	0.711741
ENSG00000228415.2	PTMAP1	HLA-A	A.03_01_01_01	Yes	primary	0.103819	-0.219449	0.197729	0.267064	0.717005
ENSG00000240065.3	PSMB9	HLA-A	A.03_01_01_01	Yes	primary	0.103819	-0.192941	0.176169	0.273426	0.722144
ENSG00000204439.3	C6orf47	HLA-A	A.03_01_01_01	Yes	conditional on the lead primary SNP eQTL	0.103819	0.178906	0.164085	0.275569	0.723182
ENSG00000204257.10	HLA-DMA	HLA-A	A.03_01_01_01	Yes	conditional on the lead primary SNP eQTL	0.103819	-0.256309	0.235771	0.276988	0.724416
ENSG00000204569.5	PPP1R10	HLA-A	A.03_01_01_01	Yes	primary	0.103819	-0.221936	0.2089	0.288054	0.733818
ENSG00000204444.6	APOM	HLA-A	A.03_01_01_01	Yes	primary	0.103819	0.174161	0.16416	0.288725	0.734641
ENSG00000227507.2	LTB	HLA-A	A.03_01_01_01	Yes	conditional on the lead primary, conditional 1 and conditional 2 SNP eQTL	0.103819	0.243304	0.231308	0.292863	0.738586
ENSG00000272221.1	XXbac-BPG181B23.7	HLA-A	A.03_01_01_01	Yes	conditional on the lead primary SNP eQTL	0.103819	-0.217293	0.207961	0.29608	0.741204
ENSG00000204315.3	FKBPL	HLA-A	A.03_01_01_01	Yes	conditional on the lead primary, conditional 1 and conditional 2 SNP eQTL	0.103819	-0.192716	0.186941	0.302592	0.745618
ENSG00000234745.5	HLA-B	HLA-A	A.03_01_01_01	Yes	primary	0.103819	0.211441	0.207635	0.308519	0.748788
ENSG00000204590.8	GNL1	HLA-A	A.03_01_01_01	Yes	primary	0.103819	-0.145972	0.144616	0.312795	0.751795
ENSG00000223865.6	HLA-DPB1	HLA-A	A.03_01_01_01	Yes	primary	0.103819	0.180591	0.183892	0.326077	0.761948
ENSG00000231074.4	HCG18	HLA-A	A.03_01_01_01	Yes	primary	0.103819	-0.129999	0.132498	0.326521	0.76201
ENSG00000237669.1	HCG4P3	HLA-A	A.03_01_01_01	Yes	conditional on the lead primary and conditional 1 SNP eQTL	0.103819	-0.255897	0.264128	0.332627	0.766409
ENSG00000272221.1	XXbac-BPG181B23.7	HLA-A	A.03_01_01_01	Yes	conditional on the lead primary and conditional 1 SNP eQTL	0.103819	-0.19739	0.204244	0.333824	0.76735
ENSG00000234745.5	HLA-B	HLA-A	A.03_01_01_01	Yes	conditional on the lead primary, conditional 1 and conditional 2 SNP eQTL	0.103819	0.190666	0.197965	0.335484	0.768616
ENSG00000204564.7	C6orf136	HLA-A	A.03_01_01_01	Yes	primary	0.103819	0.196136	0.203757	0.335751	0.768755
ENSG00000137310.7	TCF19	HLA-A	A.03_01_01_01	Yes	primary	0.103819	0.156859	0.166233	0.345369	0.77494
ENSG00000204387.8	C6orf48	HLA-A	A.03_01_01_01	Yes	primary	0.103819	-0.139037	0.147478	0.3458	0.77537
ENSG00000204574.8	ABCF1	HLA-A	A.03_01_01_01	Yes	primary	0.103819	-0.129788	0.139243	0.351287	0.778545
ENSG00000204472.8	AIF1	HLA-A	A.03_01_01_01	Yes	conditional on the lead primary SNP eQTL	0.103819	0.165247	0.177388	0.351565	0.778682
ENSG00000228415.2	PTMAP1	HLA-A	A.03_01_01_01	Yes	conditional on the lead primary SNP eQTL	0.103819	-0.175791	0.188834	0.351891	0.778946
ENSG00000168394.9	TAP1	HLA-A	A.03_01_01_01	Yes	primary	0.103819	-0.186486	0.200447	0.352188	0.779098
ENSG00000244355.3	LY6G6D	HLA-A	A.03_01_01_01	Yes	primary	0.103819	-0.180192	0.204202	0.377549	0.795569
ENSG00000198563.9	DDX39B	HLA-A	A.03_01_01_01	Yes	conditional on the lead primary and conditional 1 SNP eQTL	0.103819	-1.52687e-17	1.76365e-17	0.386631	0.801213
ENSG00000213780.6	GTF2H4	HLA-A	A.03_01_01_01	Yes	primary	0.103819	-0.162394	0.188363	0.388614	0.80274
ENSG00000204540.6	PSORS1C1	HLA-A	A.03_01_01_01	Yes	primary	0.103819	-0.185845	0.218313	0.394616	0.806817
ENSG00000204287.9	HLA-DRA	HLA-A	A.03_01_01_01	Yes	primary	0.103819	0.193427	0.22803	0.396297	0.80807
ENSG00000204568.7	MRPS18B	HLA-A	A.03_01_01_01	Yes	primary	0.103819	-0.151645	0.180408	0.40059	0.810138
ENSG00000204410.10	MSH5	HLA-A	A.03_01_01_01	Yes	primary	0.103819	0.136829	0.162904	0.400944	0.810332
ENSG00000137310.7	TCF19	HLA-A	A.03_01_01_01	Yes	conditional on the lead primary SNP eQTL	0.103819	0.131887	0.158032	0.403966	0.812026
ENSG00000204310.6	AGPAT1	HLA-A	A.03_01_01_01	Yes	conditional on the lead primary and conditional 1 SNP eQTL	0.103819	-0.139836	0.168123	0.40555	0.812849
ENSG00000272540.1	XXbac-BPG252P9.9	HLA-A	A.03_01_01_01	Yes	primary	0.103819	0.187001	0.225839	0.407655	0.813949
ENSG00000219797.2	PPIAP9	HLA-A	A.03_01_01_01	Yes	conditional on the lead primary SNP eQTL	0.103819	0.173541	0.21018	0.408987	0.814952
ENSG00000204392.6	LSM2	HLA-A	A.03_01_01_01	Yes	primary	0.103819	-0.144794	0.176819	0.412854	0.817615
ENSG00000227766.1	HCG4P5	HLA-A	A.03_01_01_01	Yes	conditional on the lead primary SNP eQTL	0.103819	0.334074	0.411029	0.416347	0.819664
ENSG00000204389.8	HSPA1A	HLA-A	A.03_01_01_01	Yes	primary	0.103819	-0.147694	0.18309	0.419854	0.821405
ENSG00000204427.7	ABHD16A	HLA-A	A.03_01_01_01	Yes	primary	0.103819	-0.136677	0.170879	0.423799	0.823142
ENSG00000204642.9	HLA-F	HLA-A	A.03_01_01_01	Yes	primary	0.103819	0.158038	0.201459	0.432766	0.828115
ENSG00000168477.13	TNXB	HLA-A	A.03_01_01_01	Yes	conditional on the lead primary SNP eQTL	0.103819	-0.224809	0.288825	0.43636	0.830284
ENSG00000168477.13	TNXB	HLA-A	A.03_01_01_01	Yes	conditional on the lead primary, conditional 1 and conditional 2 SNP eQTL	0.103819	-0.22498	0.290908	0.439303	0.832143
ENSG00000204463.8	BAG6	HLA-A	A.03_01_01_01	Yes	conditional on the lead primary and conditional 1 SNP eQTL	0.103819	0.140607	0.182945	0.442146	0.833935
ENSG00000219797.2	PPIAP9	HLA-A	A.03_01_01_01	Yes	primary	0.103819	0.162386	0.217088	0.45445	0.839262
ENSG00000234127.4	TRIM26	HLA-A	A.03_01_01_01	Yes	primary	0.103819	0.111042	0.150428	0.46041	0.842134
ENSG00000204388.5	HSPA1B	HLA-A	A.03_01_01_01	Yes	primary	0.103819	0.136676	0.185955	0.462343	0.843067
ENSG00000179344.12	HLA-DQB1	HLA-A	A.03_01_01_01	Yes	primary	0.103819	0.155618	0.213451	0.465968	0.844319
ENSG00000204389.8	HSPA1A	HLA-A	A.03_01_01_01	Yes	conditional on the lead primary, conditional 1 and conditional 2 SNP eQTL	0.103819	0.150618	0.219288	0.492177	0.856889
ENSG00000168394.9	TAP1	HLA-A	A.03_01_01_01	Yes	conditional on the lead primary and conditional 1 SNP eQTL	0.103819	-0.130251	0.197188	0.508906	0.864504
ENSG00000223837.2	BRD2-IT1	HLA-A	A.03_01_01_01	Yes	primary	0.103819	-0.140901	0.21466	0.511572	0.865435
ENSG00000204472.8	AIF1	HLA-A	A.03_01_01_01	Yes	conditional on the lead primary, conditional 1 and conditional 2 SNP eQTL	0.103819	0.121072	0.186804	0.516905	0.868005
ENSG00000137310.7	TCF19	HLA-A	A.03_01_01_01	Yes	conditional on the lead primary and conditional 1 SNP eQTL	0.103819	0.103157	0.159687	0.518284	0.868497
ENSG00000204310.6	AGPAT1	HLA-A	A.03_01_01_01	Yes	conditional on the lead primary, conditional 1 and conditional 2 SNP eQTL	0.103819	-0.107552	0.171204	0.529865	0.873432
ENSG00000196735.7	HLA-DQA1	HLA-A	A.03_01_01_01	Yes	primary	0.103819	-0.141198	0.227445	0.534731	0.875379
ENSG00000204388.5	HSPA1B	HLA-A	A.03_01_01_01	Yes	conditional on the lead primary and conditional 1 SNP eQTL	0.103819	0.154106	0.251231	0.539609	0.877588
ENSG00000204348.5	DXO	HLA-A	A.03_01_01_01	Yes	primary	0.103819	-0.110005	0.183654	0.549187	0.882971
ENSG00000206344.6	HCG27	HLA-A	A.03_01_01_01	Yes	conditional on the lead primary SNP eQTL	0.103819	-0.134323	0.230007	0.559223	0.887197
ENSG00000272273.1	XXbac-BPG252P9.10	HLA-A	A.03_01_01_01	Yes	primary	0.103819	-0.120725	0.208474	0.562528	0.888421
ENSG00000204525.10	HLA-C	HLA-A	A.03_01_01_01	Yes	conditional on the lead primary SNP eQTL	0.103819	-0.107094	0.184992	0.562649	0.888458
ENSG00000204525.10	HLA-C	HLA-A	A.03_01_01_01	Yes	conditional on the lead primary and conditional 1 SNP eQTL	0.103819	-0.105507	0.184254	0.566904	0.88984
ENSG00000236603.1	RANP1	HLA-A	A.03_01_01_01	Yes	conditional on the lead primary SNP eQTL	0.103819	-0.060782	0.108612	0.575734	0.893589
ENSG00000234745.5	HLA-B	HLA-A	A.03_01_01_01	Yes	conditional on the lead primary SNP eQTL	0.103819	0.107631	0.195126	0.581224	0.895619
ENSG00000204256.8	BRD2	HLA-A	A.03_01_01_01	Yes	primary	0.103819	-0.0831974	0.161527	0.606505	0.905402
ENSG00000204264.4	PSMB8	HLA-A	A.03_01_01_01	Yes	primary	0.103819	0.0831884	0.16288	0.609537	0.906986
ENSG00000137337.10	MDC1	HLA-A	A.03_01_01_01	Yes	primary	0.103819	0.0917841	0.179762	0.60964	0.907075
ENSG00000204304.7	PBX2	HLA-A	A.03_01_01_01	Yes	primary	0.103819	-0.0832621	0.165122	0.614088	0.909109
ENSG00000204387.8	C6orf48	HLA-A	A.03_01_01_01	Yes	conditional on the lead primary SNP eQTL	0.103819	-0.0948218	0.189739	0.617252	0.910247
ENSG00000204310.6	AGPAT1	HLA-A	A.03_01_01_01	Yes	conditional on the lead primary SNP eQTL	0.103819	-0.0801503	0.16076	0.618081	0.910474
ENSG00000221988.8	PPT2	HLA-A	A.03_01_01_01	Yes	primary	0.103819	-0.0849851	0.173664	0.624584	0.912113
ENSG00000236603.1	RANP1	HLA-A	A.03_01_01_01	Yes	primary	0.103819	-0.0550584	0.113159	0.626571	0.912852
ENSG00000204344.10	STK19	HLA-A	A.03_01_01_01	Yes	primary	0.103819	-0.0850628	0.175948	0.628773	0.913786
ENSG00000231389.3	HLA-DPA1	HLA-A	A.03_01_01_01	Yes	primary	0.103819	0.0955207	0.204254	0.64003	0.917948
ENSG00000204623.4	ZNRD1-AS1	HLA-A	A.03_01_01_01	Yes	primary	0.103819	0.0846617	0.183772	0.645022	0.919611
ENSG00000240053.8	LY6G5B	HLA-A	A.03_01_01_01	Yes	primary	0.103819	0.0649366	0.14101	0.645151	0.919664
ENSG00000204394.8	VARS	HLA-A	A.03_01_01_01	Yes	primary	0.103819	0.0717333	0.164576	0.662932	0.925641
ENSG00000204520.8	MICA	HLA-A	A.03_01_01_01	Yes	conditional on the lead primary SNP eQTL	0.103819	-0.0780055	0.183934	0.671497	0.927689
ENSG00000204366.3	ZBTB12	HLA-A	A.03_01_01_01	Yes	primary	0.103819	0.0551544	0.131087	0.67394	0.928207
ENSG00000204438.6	GPANK1	HLA-A	A.03_01_01_01	Yes	conditional on the lead primary SNP eQTL	0.103819	0.0701739	0.175801	0.68977	0.93309
ENSG00000204371.7	EHMT2	HLA-A	A.03_01_01_01	Yes	conditional on the lead primary, conditional 1 and conditional 2 SNP eQTL	0.103819	0.0585298	0.147244	0.690997	0.933378
ENSG00000204371.7	EHMT2	HLA-A	A.03_01_01_01	Yes	conditional on the lead primary SNP eQTL	0.103819	0.0566834	0.146519	0.698854	0.935844
ENSG00000204498.6	NFKBIL1	HLA-A	A.03_01_01_01	Yes	primary	0.103819	0.0552643	0.154789	0.72107	0.942542
ENSG00000137343.13	ATAT1	HLA-A	A.03_01_01_01	Yes	primary	0.103819	-0.0595759	0.167722	0.722436	0.942983
ENSG00000204592.5	HLA-E	HLA-A	A.03_01_01_01	Yes	conditional on the lead primary and conditional 1 SNP eQTL	0.103819	0.0644437	0.182033	0.723322	0.943194
ENSG00000240053.8	LY6G5B	HLA-A	A.03_01_01_01	Yes	conditional on the lead primary SNP eQTL	0.103819	0.0455019	0.135508	0.737031	0.94717
ENSG00000204371.7	EHMT2	HLA-A	A.03_01_01_01	Yes	primary	0.103819	0.0516804	0.155358	0.739396	0.948277
ENSG00000204438.6	GPANK1	HLA-A	A.03_01_01_01	Yes	primary	0.103819	0.0599771	0.187429	0.748969	0.950477
ENSG00000213722.4	DDAH2	HLA-A	A.03_01_01_01	Yes	primary	0.103819	0.0418308	0.138293	0.762287	0.953425
ENSG00000204315.3	FKBPL	HLA-A	A.03_01_01_01	Yes	conditional on the lead primary and conditional 1 SNP eQTL	0.103819	-0.0566864	0.188561	0.7637	0.953493
ENSG00000137312.10	FLOT1	HLA-A	A.03_01_01_01	Yes	conditional on the lead primary SNP eQTL	0.103819	-0.0482963	0.167599	0.77322	0.955409
ENSG00000137331.11	IER3	HLA-A	A.03_01_01_01	Yes	primary	0.103819	-0.0380875	0.141405	0.78766	0.95865
ENSG00000229836.1	XXbac-BPG248L24.10	HLA-A	A.03_01_01_01	Yes	conditional on the lead primary SNP eQTL	0.103819	-0.0481162	0.184102	0.793818	0.960438
ENSG00000254870.1	ATP6V1G2-DDX39B	HLA-A	A.03_01_01_01	Yes	conditional on the lead primary SNP eQTL	0.103819	-0.0398421	0.155595	0.797903	0.960968
ENSG00000204252.8	HLA-DOA	HLA-A	A.03_01_01_01	Yes	primary	0.103819	0.0505633	0.200881	0.801267	0.96174
ENSG00000198563.9	DDX39B	HLA-A	A.03_01_01_01	Yes	conditional on the lead primary SNP eQTL	0.103819	-0.011991	0.0494499	0.808402	0.963327
ENSG00000241370.1	RPP21	HLA-A	A.03_01_01_01	Yes	primary	0.103819	-0.0417595	0.173394	0.809682	0.9636
ENSG00000270604.1	HCG17	HLA-A	A.03_01_01_01	Yes	primary	0.103819	0.0504593	0.210968	0.810966	0.963952
ENSG00000235781.1	XXbac-BPG249D20.9	HLA-A	A.03_01_01_01	Yes	primary	0.103819	0.052483	0.220234	0.811644	0.964155
ENSG00000204287.9	HLA-DRA	HLA-A	A.03_01_01_01	Yes	conditional on the lead primary SNP eQTL	0.103819	0.0459973	0.20178	0.81968	0.965798
ENSG00000213676.6	ATF6B	HLA-A	A.03_01_01_01	Yes	primary	0.103819	0.0388857	0.172225	0.821369	0.96607
ENSG00000204256.8	BRD2	HLA-A	A.03_01_01_01	Yes	conditional on the lead primary SNP eQTL	0.103819	-0.0347912	0.154324	0.821635	0.96607
ENSG00000204310.6	AGPAT1	HLA-A	A.03_01_01_01	Yes	primary	0.103819	-0.0380107	0.176257	0.829257	0.968168
ENSG00000204536.9	CCHCR1	HLA-A	A.03_01_01_01	Yes	primary	0.103819	-0.0418015	0.207493	0.840339	0.97049
ENSG00000204592.5	HLA-E	HLA-A	A.03_01_01_01	Yes	conditional on the lead primary SNP eQTL	0.103819	0.035745	0.181571	0.843933	0.971473
ENSG00000204267.9	TAP2	HLA-A	A.03_01_01_01	Yes	primary	0.103819	0.037883	0.195879	0.846646	0.971941
ENSG00000237923.1	XXbac-BPG27H4.8	HLA-A	A.03_01_01_01	Yes	primary	0.103819	0.0301955	0.158164	0.848595	0.972337
ENSG00000213676.6	ATF6B	HLA-A	A.03_01_01_01	Yes	conditional on the lead primary and conditional 1 SNP eQTL	0.103819	0.0498226	0.265545	0.851172	0.972614
ENSG00000229836.1	XXbac-BPG248L24.10	HLA-A	A.03_01_01_01	Yes	primary	0.103819	-0.0350736	0.189834	0.853418	0.972745
ENSG00000137404.10	NRM	HLA-A	A.03_01_01_01	Yes	primary	0.103819	0.030943	0.172742	0.857837	0.973263
ENSG00000204438.6	GPANK1	HLA-A	A.03_01_01_01	Yes	conditional on the lead primary, conditional 1 and conditional 2 SNP eQTL	0.103819	0.0313642	0.182366	0.86345	0.974259
ENSG00000204599.10	TRIM39	HLA-A	A.03_01_01_01	Yes	conditional on the lead primary SNP eQTL	0.103819	-0.0204756	0.125806	0.870711	0.976199
ENSG00000263756.1	XXbac-BPG181M17.6	HLA-A	A.03_01_01_01	Yes	primary	0.103819	-0.0362901	0.225464	0.872127	0.976314
ENSG00000204469.8	PRRC2A	HLA-A	A.03_01_01_01	Yes	primary	0.103819	0.0238141	0.164814	0.885113	0.979441
ENSG00000204356.7	NELFE	HLA-A	A.03_01_01_01	Yes	primary	0.103819	0.025817	0.182412	0.88745	0.980084
ENSG00000224389.4	C4B	HLA-A	A.03_01_01_01	Yes	primary	0.103819	-0.0275918	0.2011	0.890869	0.980365
ENSG00000196230.8	TUBB	HLA-A	A.03_01_01_01	Yes	primary	0.103819	0.0129136	0.10541	0.902496	0.982139
ENSG00000204531.11	POU5F1	HLA-A	A.03_01_01_01	Yes	primary	0.103819	-0.0129627	0.10581	0.902496	0.982139
ENSG00000204351.7	SKIV2L	HLA-A	A.03_01_01_01	Yes	primary	0.103819	0.0194455	0.197528	0.92158	0.984797
ENSG00000204305.9	AGER	HLA-A	A.03_01_01_01	Yes	primary	0.103819	0.0158271	0.164594	0.923395	0.985223
ENSG00000204520.8	MICA	HLA-A	A.03_01_01_01	Yes	primary	0.103819	-0.0195796	0.204621	0.923769	0.985223
ENSG00000204576.7	PRR3	HLA-A	A.03_01_01_01	Yes	primary	0.103819	-0.0146609	0.160219	0.927091	0.985775
ENSG00000224389.4	C4B	HLA-A	A.03_01_01_01	Yes	conditional on the lead primary SNP eQTL	0.103819	-0.0171551	0.193652	0.92941	0.986045
ENSG00000204348.5	DXO	HLA-A	A.03_01_01_01	Yes	conditional on the lead primary SNP eQTL	0.103819	-0.0147237	0.167063	0.929771	0.986122
ENSG00000227939.1	RPL3P2	HLA-A	A.03_01_01_01	Yes	primary	0.103819	-0.0161593	0.188139	0.931554	0.986692
ENSG00000255152.4	MSH5-SAPCD1	HLA-A	A.03_01_01_01	Yes	primary	0.103819	-0.0163538	0.195077	0.93319	0.986784
ENSG00000204439.3	C6orf47	HLA-A	A.03_01_01_01	Yes	primary	0.103819	-0.0110898	0.165924	0.946712	0.989656
ENSG00000204304.7	PBX2	HLA-A	A.03_01_01_01	Yes	conditional on the lead primary SNP eQTL	0.103819	-0.0139579	0.224599	0.950447	0.990368
ENSG00000213676.6	ATF6B	HLA-A	A.03_01_01_01	Yes	conditional on the lead primary SNP eQTL	0.103819	0.012545	0.234971	0.957421	0.992064
ENSG00000179344.12	HLA-DQB1	HLA-A	A.03_01_01_01	Yes	conditional on the lead primary SNP eQTL	0.103819	0.00982529	0.193793	0.959565	0.99238
ENSG00000204463.8	BAG6	HLA-A	A.03_01_01_01	Yes	conditional on the lead primary SNP eQTL	0.103819	0.00798275	0.184792	0.965543	0.993564
ENSG00000204525.10	HLA-C	HLA-A	A.03_01_01_01	Yes	primary	0.103819	0.00769769	0.201055	0.969459	0.994243
ENSG00000198563.9	DDX39B	HLA-A	A.03_01_01_01	Yes	primary	0.103819	0.0018172	0.0516329	0.971925	0.994732
ENSG00000237669.1	HCG4P3	HLA-A	A.03_01_01_01	Yes	primary	0.103819	-0.00774235	0.22608	0.972681	0.99495
ENSG00000204520.8	MICA	HLA-A	A.03_01_01_01	Yes	conditional on the lead primary and conditional 1 SNP eQTL	0.103819	0.00395696	0.194196	0.983743	0.997378
ENSG00000272221.1	XXbac-BPG181B23.7	HLA-A	A.03_01_01_01	Yes	primary	0.103819	0.00431979	0.225508	0.984717	0.997429
ENSG00000204472.8	AIF1	HLA-A	A.03_01_01_01	Yes	primary	0.103819	-0.00246657	0.176011	0.988819	0.998575
ENSG00000241106.2	HLA-DOB	HLA-A	A.03_01_01_01	Yes	conditional on the lead primary and conditional 1 SNP eQTL	0.103819	0.0014535	0.275852	0.995796	0.999388
ENSG00000204389.8	HSPA1A	HLA-A	A.03_01_01_01	Yes	conditional on the lead primary SNP eQTL	0.103819	0.00114921	0.248058	0.996304	0.999427
ENSG00000270604.1	HCG17	HLA-A	A.03_01_01_01	Yes	conditional on the lead primary SNP eQTL	0.103819	0.00113956	0.313106	0.997096	0.999703
ENSG00000204520.8	MICA	HLA-A	A.03_01_01_01	Yes	conditional on the lead primary, conditional 1 and conditional 2 SNP eQTL	0.103819	-0.00047657	0.199981	0.998099	0.999728
ENSG00000230795.2	HLA-K	HLA-A	A.11_01_01_01	Yes	conditional on the lead primary SNP eQTL	0.0942721	-1.41544	0.211439	2.16679e-11	8.11069e-09
ENSG00000206341.6	HLA-H	HLA-A	A.11_01_01_01	Yes	conditional on the lead primary and conditional 1 SNP eQTL	0.0942721	1.03481	0.210799	9.15478e-07	0.000131448
ENSG00000206341.6	HLA-H	HLA-A	A.11_01_01_01	Yes	conditional on the lead primary SNP eQTL	0.0942721	1.03245	0.210668	9.54373e-07	0.000135131
ENSG00000230795.2	HLA-K	HLA-A	A.11_01_01_01	Yes	primary	0.0942721	-1.03743	0.23545	1.05214e-05	0.00111967
ENSG00000230795.2	HLA-K	HLA-A	A.11_01_01_01	Yes	conditional on the lead primary and conditional 1 SNP eQTL	0.0942721	-1.14229	0.270855	2.47202e-05	0.00230756
ENSG00000227766.1	HCG4P5	HLA-A	A.11_01_01_01	Yes	conditional on the lead primary SNP eQTL	0.0942721	1.07247	0.270257	7.2374e-05	0.00556777
ENSG00000204632.7	HLA-G	HLA-A	A.11_01_01_01	Yes	primary	0.0942721	-0.857192	0.240146	0.000357716	0.0193069
ENSG00000239257.1	RPL23AP1	HLA-A	A.11_01_01_01	Yes	primary	0.0942721	-0.814338	0.246634	0.000960649	0.0394096
ENSG00000227766.1	HCG4P5	HLA-A	A.11_01_01_01	Yes	primary	0.0942721	0.797529	0.246094	0.00119214	0.0461151
ENSG00000204623.4	ZNRD1-AS1	HLA-A	A.11_01_01_01	Yes	primary	0.0942721	0.658943	0.211262	0.00181413	0.0610237
ENSG00000204642.9	HLA-F	HLA-A	A.11_01_01_01	Yes	conditional on the lead primary and conditional 1 SNP eQTL	0.0942721	-0.79788	0.278423	0.00416069	0.104191
ENSG00000214922.5	HLA-F-AS1	HLA-A	A.11_01_01_01	Yes	conditional on the lead primary, conditional 1 and conditional 2 SNP eQTL	0.0942721	-0.610409	0.216467	0.0048042	0.113845
ENSG00000204366.3	ZBTB12	HLA-A	A.11_01_01_01	Yes	primary	0.0942721	0.421386	0.151339	0.00536283	0.121606
ENSG00000219797.2	PPIAP9	HLA-A	A.11_01_01_01	Yes	primary	0.0942721	-0.671783	0.253003	0.0079254	0.153091
ENSG00000204642.9	HLA-F	HLA-A	A.11_01_01_01	Yes	conditional on the lead primary, conditional 1 and conditional 2 SNP eQTL	0.0942721	-0.712671	0.273412	0.00914504	0.165956
ENSG00000214922.5	HLA-F-AS1	HLA-A	A.11_01_01_01	Yes	conditional on the lead primary and conditional 1 SNP eQTL	0.0942721	-0.560668	0.215561	0.00929591	0.167884
ENSG00000198563.9	DDX39B	HLA-A	A.11_01_01_01	Yes	conditional on the lead primary and conditional 1 SNP eQTL	0.0942721	-4.65417e-17	1.82056e-17	0.0105746	0.181536
ENSG00000204315.3	FKBPL	HLA-A	A.11_01_01_01	Yes	primary	0.0942721	0.492077	0.193732	0.0110857	0.186279
ENSG00000204642.9	HLA-F	HLA-A	A.11_01_01_01	Yes	primary	0.0942721	0.564365	0.223051	0.0113996	0.188402
ENSG00000204642.9	HLA-F	HLA-A	A.11_01_01_01	Yes	conditional on the lead primary SNP eQTL	0.0942721	-0.69514	0.276057	0.011799	0.192316
ENSG00000206341.6	HLA-H	HLA-A	A.11_01_01_01	Yes	conditional on the lead primary, conditional 1 and conditional 2 SNP eQTL	0.0942721	0.612267	0.251522	0.0149228	0.21959
ENSG00000244731.3	C4A	HLA-A	A.11_01_01_01	Yes	primary	0.0942721	0.596828	0.245764	0.015163	0.221648
ENSG00000214922.5	HLA-F-AS1	HLA-A	A.11_01_01_01	Yes	primary	0.0942721	-0.540272	0.222787	0.0153061	0.222573
ENSG00000243753.1	HLA-L	HLA-A	A.11_01_01_01	Yes	primary	0.0942721	-0.553425	0.234203	0.0181267	0.242931
ENSG00000270604.1	HCG17	HLA-A	A.11_01_01_01	Yes	primary	0.0942721	0.571503	0.247404	0.0208883	0.260197
ENSG00000214894.2	LINC00243	HLA-A	A.11_01_01_01	Yes	primary	0.0942721	-0.572197	0.250374	0.0222914	0.268904
ENSG00000204525.10	HLA-C	HLA-A	A.11_01_01_01	Yes	primary	0.0942721	-0.485514	0.214715	0.023747	0.277316
ENSG00000206341.6	HLA-H	HLA-A	A.11_01_01_01	Yes	primary	0.0942721	0.560228	0.253835	0.0273102	0.295489
ENSG00000204463.8	BAG6	HLA-A	A.11_01_01_01	Yes	primary	0.0942721	0.441808	0.201014	0.0279565	0.298353
ENSG00000224389.4	C4B	HLA-A	A.11_01_01_01	Yes	primary	0.0942721	0.510163	0.235453	0.0302552	0.309444
ENSG00000204525.10	HLA-C	HLA-A	A.11_01_01_01	Yes	conditional on the lead primary and conditional 1 SNP eQTL	0.0942721	-0.426774	0.198364	0.0314393	0.315774
ENSG00000219797.2	PPIAP9	HLA-A	A.11_01_01_01	Yes	conditional on the lead primary SNP eQTL	0.0942721	-0.533191	0.249753	0.032771	0.322009
ENSG00000224389.4	C4B	HLA-A	A.11_01_01_01	Yes	conditional on the lead primary SNP eQTL	0.0942721	0.478723	0.227439	0.0353053	0.332999
ENSG00000204308.6	RNF5	HLA-A	A.11_01_01_01	Yes	primary	0.0942721	0.475098	0.226695	0.0361038	0.336056
ENSG00000214922.5	HLA-F-AS1	HLA-A	A.11_01_01_01	Yes	conditional on the lead primary SNP eQTL	0.0942721	-0.429329	0.205006	0.0362399	0.336841
ENSG00000176998.3	HCG4	HLA-A	A.11_01_01_01	Yes	primary	0.0942721	0.48313	0.231984	0.037288	0.341091
ENSG00000204525.10	HLA-C	HLA-A	A.11_01_01_01	Yes	conditional on the lead primary SNP eQTL	0.0942721	-0.407991	0.198746	0.0400894	0.351375
ENSG00000258388.3	PPT2-EGFL8	HLA-A	A.11_01_01_01	Yes	primary	0.0942721	0.50964	0.254826	0.0455054	0.369454
ENSG00000234127.4	TRIM26	HLA-A	A.11_01_01_01	Yes	primary	0.0942721	0.351904	0.17606	0.0456331	0.369826
ENSG00000176998.3	HCG4	HLA-A	A.11_01_01_01	Yes	conditional on the lead primary SNP eQTL	0.0942721	0.42045	0.214309	0.0497758	0.385471
ENSG00000206344.6	HCG27	HLA-A	A.11_01_01_01	Yes	primary	0.0942721	-0.490542	0.250127	0.0498592	0.385804
ENSG00000204257.10	HLA-DMA	HLA-A	A.11_01_01_01	Yes	conditional on the lead primary SNP eQTL	0.0942721	-0.495907	0.265255	0.0615462	0.420621
ENSG00000204385.6	SLC44A4	HLA-A	A.11_01_01_01	Yes	primary	0.0942721	-0.369726	0.199705	0.0641171	0.427891
ENSG00000204310.6	AGPAT1	HLA-A	A.11_01_01_01	Yes	primary	0.0942721	0.378442	0.206282	0.0665678	0.434382
ENSG00000204390.8	HSPA1L	HLA-A	A.11_01_01_01	Yes	primary	0.0942721	0.440602	0.240389	0.0668221	0.434985
ENSG00000242574.4	HLA-DMB	HLA-A	A.11_01_01_01	Yes	conditional on the lead primary, conditional 1 and conditional 2 SNP eQTL	0.0942721	0.429793	0.23546	0.0679504	0.43756
ENSG00000231074.4	HCG18	HLA-A	A.11_01_01_01	Yes	conditional on the lead primary SNP eQTL	0.0942721	0.266515	0.149246	0.0741415	0.455015
ENSG00000168394.9	TAP1	HLA-A	A.11_01_01_01	Yes	primary	0.0942721	0.416944	0.234329	0.0751893	0.457836
ENSG00000231074.4	HCG18	HLA-A	A.11_01_01_01	Yes	primary	0.0942721	0.275418	0.155631	0.0767793	0.461634
ENSG00000204257.10	HLA-DMA	HLA-A	A.11_01_01_01	Yes	conditional on the lead primary and conditional 1 SNP eQTL	0.0942721	-0.491813	0.278446	0.0773489	0.463231
ENSG00000204385.6	SLC44A4	HLA-A	A.11_01_01_01	Yes	conditional on the lead primary SNP eQTL	0.0942721	-0.334017	0.189178	0.0774598	0.4636
ENSG00000204498.6	NFKBIL1	HLA-A	A.11_01_01_01	Yes	primary	0.0942721	0.315878	0.18019	0.0795985	0.468536
ENSG00000204394.8	VARS	HLA-A	A.11_01_01_01	Yes	primary	0.0942721	-0.33714	0.192801	0.0803531	0.469986
ENSG00000206337.6	HCP5	HLA-A	A.11_01_01_01	Yes	primary	0.0942721	0.388193	0.224749	0.0841264	0.479541
ENSG00000204396.6	VWA7	HLA-A	A.11_01_01_01	Yes	primary	0.0942721	0.433368	0.253649	0.0875366	0.487569
ENSG00000270604.1	HCG17	HLA-A	A.11_01_01_01	Yes	conditional on the lead primary SNP eQTL	0.0942721	0.539499	0.319271	0.0910697	0.495277
ENSG00000204314.6	PRRT1	HLA-A	A.11_01_01_01	Yes	primary	0.0942721	0.361651	0.21675	0.0952134	0.502595
ENSG00000213654.5	GPSM3	HLA-A	A.11_01_01_01	Yes	primary	0.0942721	-0.32105	0.19242	0.0952199	0.502595
ENSG00000204385.6	SLC44A4	HLA-A	A.11_01_01_01	Yes	conditional on the lead primary and conditional 1 SNP eQTL	0.0942721	-0.314752	0.190099	0.0977765	0.508234
ENSG00000179344.12	HLA-DQB1	HLA-A	A.11_01_01_01	Yes	primary	0.0942721	0.390395	0.236208	0.0983789	0.509194
ENSG00000168394.9	TAP1	HLA-A	A.11_01_01_01	Yes	conditional on the lead primary SNP eQTL	0.0942721	0.352323	0.214016	0.099712	0.511142
ENSG00000231074.4	HCG18	HLA-A	A.11_01_01_01	Yes	conditional on the lead primary, conditional 1 and conditional 2 SNP eQTL	0.0942721	0.241611	0.149145	0.105236	0.523649
ENSG00000204315.3	FKBPL	HLA-A	A.11_01_01_01	Yes	conditional on the lead primary SNP eQTL	0.0942721	0.306294	0.189994	0.106935	0.526535
ENSG00000204356.7	NELFE	HLA-A	A.11_01_01_01	Yes	primary	0.0942721	0.338085	0.212519	0.111645	0.532754
ENSG00000237669.1	HCG4P3	HLA-A	A.11_01_01_01	Yes	primary	0.0942721	0.398219	0.261497	0.127797	0.560034
ENSG00000204574.8	ABCF1	HLA-A	A.11_01_01_01	Yes	conditional on the lead primary SNP eQTL	0.0942721	0.306141	0.202047	0.129724	0.562568
ENSG00000242574.4	HLA-DMB	HLA-A	A.11_01_01_01	Yes	conditional on the lead primary SNP eQTL	0.0942721	0.343968	0.227219	0.130071	0.563044
ENSG00000242574.4	HLA-DMB	HLA-A	A.11_01_01_01	Yes	primary	0.0942721	0.352045	0.239704	0.141923	0.580043
ENSG00000204599.10	TRIM39	HLA-A	A.11_01_01_01	Yes	primary	0.0942721	0.223937	0.152802	0.142775	0.581476
ENSG00000066379.10	ZNRD1	HLA-A	A.11_01_01_01	Yes	conditional on the lead primary SNP eQTL	0.0942721	0.299763	0.205634	0.14491	0.584471
ENSG00000204261.4	TAPSAR1	HLA-A	A.11_01_01_01	Yes	primary	0.0942721	0.351731	0.243861	0.149205	0.590618
ENSG00000137343.13	ATAT1	HLA-A	A.11_01_01_01	Yes	primary	0.0942721	0.279051	0.195061	0.15255	0.59507
ENSG00000204438.6	GPANK1	HLA-A	A.11_01_01_01	Yes	primary	0.0942721	0.309353	0.216381	0.152812	0.595147
ENSG00000204618.4	RNF39	HLA-A	A.11_01_01_01	Yes	primary	0.0942721	-0.3385	0.236997	0.153209	0.595607
ENSG00000204310.6	AGPAT1	HLA-A	A.11_01_01_01	Yes	conditional on the lead primary and conditional 1 SNP eQTL	0.0942721	0.282871	0.198399	0.153936	0.596498
ENSG00000204348.5	DXO	HLA-A	A.11_01_01_01	Yes	primary	0.0942721	0.296729	0.210853	0.159346	0.603224
ENSG00000224557.3	HLA-DPB2	HLA-A	A.11_01_01_01	Yes	primary	0.0942721	-0.334325	0.238942	0.161756	0.606106
ENSG00000204388.5	HSPA1B	HLA-A	A.11_01_01_01	Yes	conditional on the lead primary and conditional 1 SNP eQTL	0.0942721	-0.513647	0.372132	0.1675	0.61373
ENSG00000204310.6	AGPAT1	HLA-A	A.11_01_01_01	Yes	conditional on the lead primary, conditional 1 and conditional 2 SNP eQTL	0.0942721	0.276975	0.201926	0.170169	0.617433
ENSG00000204310.6	AGPAT1	HLA-A	A.11_01_01_01	Yes	conditional on the lead primary SNP eQTL	0.0942721	0.26037	0.190265	0.171167	0.618821
ENSG00000213719.4	CLIC1	HLA-A	A.11_01_01_01	Yes	primary	0.0942721	0.22927	0.167925	0.172154	0.620006
ENSG00000066379.10	ZNRD1	HLA-A	A.11_01_01_01	Yes	primary	0.0942721	0.291715	0.214061	0.172956	0.621509
ENSG00000204371.7	EHMT2	HLA-A	A.11_01_01_01	Yes	primary	0.0942721	-0.240465	0.182235	0.186991	0.639433
ENSG00000254870.1	ATP6V1G2-DDX39B	HLA-A	A.11_01_01_01	Yes	conditional on the lead primary and conditional 1 SNP eQTL	0.0942721	-0.255021	0.1946	0.190031	0.642505
ENSG00000204531.11	POU5F1	HLA-A	A.11_01_01_01	Yes	primary	0.0942721	0.161915	0.124309	0.192738	0.645907
ENSG00000196230.8	TUBB	HLA-A	A.11_01_01_01	Yes	primary	0.0942721	-0.161302	0.123838	0.192738	0.645907
ENSG00000137411.12	VARS2	HLA-A	A.11_01_01_01	Yes	primary	0.0942721	0.253867	0.195943	0.195108	0.649186
ENSG00000227766.1	HCG4P5	HLA-A	A.11_01_01_01	Yes	conditional on the lead primary and conditional 1 SNP eQTL	0.0942721	0.346767	0.268023	0.195735	0.649645
ENSG00000204619.3	PPP1R11	HLA-A	A.11_01_01_01	Yes	primary	0.0942721	-0.292844	0.226727	0.19649	0.650381
ENSG00000224328.1	MDC1-AS1	HLA-A	A.11_01_01_01	Yes	primary	0.0942721	-0.337029	0.262309	0.198844	0.652927
ENSG00000204287.9	HLA-DRA	HLA-A	A.11_01_01_01	Yes	primary	0.0942721	-0.32193	0.257524	0.211264	0.665456
ENSG00000204592.5	HLA-E	HLA-A	A.11_01_01_01	Yes	conditional on the lead primary and conditional 1 SNP eQTL	0.0942721	0.239885	0.19279	0.213396	0.667358
ENSG00000204644.5	ZFP57	HLA-A	A.11_01_01_01	Yes	primary	0.0942721	-0.289803	0.234738	0.216987	0.671653
ENSG00000204301.5	NOTCH4	HLA-A	A.11_01_01_01	Yes	primary	0.0942721	0.272083	0.220724	0.217694	0.672196
ENSG00000223865.6	HLA-DPB1	HLA-A	A.11_01_01_01	Yes	conditional on the lead primary and conditional 1 SNP eQTL	0.0942721	0.238805	0.19396	0.218246	0.67236
ENSG00000168477.13	TNXB	HLA-A	A.11_01_01_01	Yes	primary	0.0942721	0.255902	0.208919	0.220617	0.674556
ENSG00000204574.8	ABCF1	HLA-A	A.11_01_01_01	Yes	conditional on the lead primary and conditional 1 SNP eQTL	0.0942721	0.195005	0.159629	0.221853	0.675699
ENSG00000221988.8	PPT2	HLA-A	A.11_01_01_01	Yes	primary	0.0942721	-0.248241	0.204366	0.224485	0.678304
ENSG00000240065.3	PSMB9	HLA-A	A.11_01_01_01	Yes	primary	0.0942721	0.250042	0.205858	0.224506	0.678311
ENSG00000204257.10	HLA-DMA	HLA-A	A.11_01_01_01	Yes	primary	0.0942721	-0.297557	0.245343	0.225199	0.679098
ENSG00000228415.2	PTMAP1	HLA-A	A.11_01_01_01	Yes	conditional on the lead primary SNP eQTL	0.0942721	-0.271063	0.22469	0.227669	0.680716
ENSG00000241106.2	HLA-DOB	HLA-A	A.11_01_01_01	Yes	conditional on the lead primary and conditional 1 SNP eQTL	0.0942721	-0.344428	0.287523	0.230951	0.683691
ENSG00000204482.6	LST1	HLA-A	A.11_01_01_01	Yes	primary	0.0942721	-0.307996	0.257691	0.232002	0.684565
ENSG00000204438.6	GPANK1	HLA-A	A.11_01_01_01	Yes	conditional on the lead primary SNP eQTL	0.0942721	0.24308	0.204456	0.234474	0.687021
ENSG00000204256.8	BRD2	HLA-A	A.11_01_01_01	Yes	conditional on the lead primary SNP eQTL	0.0942721	-0.215474	0.181874	0.236118	0.688354
ENSG00000204396.6	VWA7	HLA-A	A.11_01_01_01	Yes	conditional on the lead primary SNP eQTL	0.0942721	0.290981	0.246219	0.237286	0.689467
ENSG00000230622.1	UQCRHP1	HLA-A	A.11_01_01_01	Yes	primary	0.0942721	0.298214	0.254526	0.24134	0.693712
ENSG00000263756.1	XXbac-BPG181M17.6	HLA-A	A.11_01_01_01	Yes	primary	0.0942721	-0.307403	0.263107	0.242662	0.694753
ENSG00000204304.7	PBX2	HLA-A	A.11_01_01_01	Yes	primary	0.0942721	0.223535	0.19218	0.244767	0.69702
ENSG00000137404.10	NRM	HLA-A	A.11_01_01_01	Yes	primary	0.0942721	0.234068	0.201273	0.244855	0.69702
ENSG00000204438.6	GPANK1	HLA-A	A.11_01_01_01	Yes	conditional on the lead primary, conditional 1 and conditional 2 SNP eQTL	0.0942721	0.24518	0.211474	0.246299	0.698467
ENSG00000230313.1	HCG24	HLA-A	A.11_01_01_01	Yes	primary	0.0942721	0.282815	0.244761	0.247897	0.700018
ENSG00000204256.8	BRD2	HLA-A	A.11_01_01_01	Yes	primary	0.0942721	-0.217895	0.189832	0.251037	0.702468
ENSG00000204371.7	EHMT2	HLA-A	A.11_01_01_01	Yes	conditional on the lead primary, conditional 1 and conditional 2 SNP eQTL	0.0942721	-0.196655	0.172579	0.254492	0.705976
ENSG00000204371.7	EHMT2	HLA-A	A.11_01_01_01	Yes	conditional on the lead primary SNP eQTL	0.0942721	-0.19466	0.172004	0.257753	0.709451
ENSG00000204348.5	DXO	HLA-A	A.11_01_01_01	Yes	conditional on the lead primary SNP eQTL	0.0942721	0.218221	0.19371	0.259939	0.711396
ENSG00000204308.6	RNF5	HLA-A	A.11_01_01_01	Yes	conditional on the lead primary SNP eQTL	0.0942721	0.236081	0.210272	0.261547	0.712849
ENSG00000206344.6	HCG27	HLA-A	A.11_01_01_01	Yes	conditional on the lead primary SNP eQTL	0.0942721	-0.287362	0.262535	0.273706	0.722144
ENSG00000204315.3	FKBPL	HLA-A	A.11_01_01_01	Yes	conditional on the lead primary and conditional 1 SNP eQTL	0.0942721	0.204424	0.190758	0.283883	0.730342
ENSG00000137337.10	MDC1	HLA-A	A.11_01_01_01	Yes	primary	0.0942721	-0.224029	0.210215	0.286555	0.732342
ENSG00000223865.6	HLA-DPB1	HLA-A	A.11_01_01_01	Yes	conditional on the lead primary, conditional 1 and conditional 2 SNP eQTL	0.0942721	0.212879	0.201374	0.290452	0.736346
ENSG00000204304.7	PBX2	HLA-A	A.11_01_01_01	Yes	conditional on the lead primary SNP eQTL	0.0942721	0.241806	0.230068	0.293249	0.738923
ENSG00000137310.7	TCF19	HLA-A	A.11_01_01_01	Yes	conditional on the lead primary and conditional 1 SNP eQTL	0.0942721	0.191833	0.184128	0.297482	0.742305
ENSG00000229836.1	XXbac-BPG248L24.10	HLA-A	A.11_01_01_01	Yes	primary	0.0942721	0.231503	0.225389	0.304362	0.746742
ENSG00000234127.4	TRIM26	HLA-A	A.11_01_01_01	Yes	conditional on the lead primary SNP eQTL	0.0942721	0.170222	0.166116	0.305496	0.747549
ENSG00000230313.1	HCG24	HLA-A	A.11_01_01_01	Yes	conditional on the lead primary SNP eQTL	0.0942721	0.230184	0.22478	0.305817	0.747745
ENSG00000204592.5	HLA-E	HLA-A	A.11_01_01_01	Yes	conditional on the lead primary SNP eQTL	0.0942721	0.194637	0.191957	0.310601	0.750352
ENSG00000204392.6	LSM2	HLA-A	A.11_01_01_01	Yes	primary	0.0942721	0.207869	0.207992	0.317598	0.755181
ENSG00000204560.5	DHX16	HLA-A	A.11_01_01_01	Yes	primary	0.0942721	-0.190074	0.19035	0.318013	0.755618
ENSG00000204315.3	FKBPL	HLA-A	A.11_01_01_01	Yes	conditional on the lead primary, conditional 1 and conditional 2 SNP eQTL	0.0942721	0.184261	0.186141	0.322223	0.758958
ENSG00000137310.7	TCF19	HLA-A	A.11_01_01_01	Yes	conditional on the lead primary SNP eQTL	0.0942721	0.180272	0.184188	0.327711	0.762811
ENSG00000168394.9	TAP1	HLA-A	A.11_01_01_01	Yes	conditional on the lead primary and conditional 1 SNP eQTL	0.0942721	0.219497	0.227372	0.33436	0.767859
ENSG00000204482.6	LST1	HLA-A	A.11_01_01_01	Yes	conditional on the lead primary SNP eQTL	0.0942721	-0.236789	0.246845	0.337426	0.770044
ENSG00000241106.2	HLA-DOB	HLA-A	A.11_01_01_01	Yes	primary	0.0942721	0.21968	0.234918	0.349719	0.777776
ENSG00000137310.7	TCF19	HLA-A	A.11_01_01_01	Yes	primary	0.0942721	0.181001	0.193889	0.350546	0.778078
ENSG00000204538.3	PSORS1C2	HLA-A	A.11_01_01_01	Yes	conditional on the lead primary and conditional 1 SNP eQTL	0.0942721	0.203219	0.222972	0.362078	0.786138
ENSG00000204538.3	PSORS1C2	HLA-A	A.11_01_01_01	Yes	conditional on the lead primary SNP eQTL	0.0942721	0.187575	0.210387	0.372622	0.79255
ENSG00000166278.10	C2	HLA-A	A.11_01_01_01	Yes	primary	0.0942721	0.207144	0.232729	0.373431	0.792716
ENSG00000228415.2	PTMAP1	HLA-A	A.11_01_01_01	Yes	primary	0.0942721	-0.20561	0.234143	0.379868	0.796964
ENSG00000204427.7	ABHD16A	HLA-A	A.11_01_01_01	Yes	primary	0.0942721	0.17666	0.203102	0.384405	0.799995
ENSG00000204439.3	C6orf47	HLA-A	A.11_01_01_01	Yes	conditional on the lead primary SNP eQTL	0.0942721	-0.167734	0.194	0.387255	0.801648
ENSG00000179344.12	HLA-DQB1	HLA-A	A.11_01_01_01	Yes	conditional on the lead primary SNP eQTL	0.0942721	0.18558	0.217578	0.393695	0.806076
ENSG00000204564.7	C6orf136	HLA-A	A.11_01_01_01	Yes	primary	0.0942721	-0.199083	0.240582	0.40795	0.814162
ENSG00000228962.1	HCG23	HLA-A	A.11_01_01_01	Yes	primary	0.0942721	-0.19938	0.24636	0.41834	0.820348
ENSG00000204475.5	NCR3	HLA-A	A.11_01_01_01	Yes	primary	0.0942721	-0.189605	0.235025	0.419813	0.821405
ENSG00000237669.1	HCG4P3	HLA-A	A.11_01_01_01	Yes	conditional on the lead primary, conditional 1 and conditional 2 SNP eQTL	0.0942721	0.185867	0.239135	0.437012	0.83046
ENSG00000213676.6	ATF6B	HLA-A	A.11_01_01_01	Yes	conditional on the lead primary SNP eQTL	0.0942721	0.18563	0.242452	0.443894	0.834652
ENSG00000237923.1	XXbac-BPG27H4.8	HLA-A	A.11_01_01_01	Yes	primary	0.0942721	-0.139313	0.18358	0.447932	0.836683
ENSG00000204574.8	ABCF1	HLA-A	A.11_01_01_01	Yes	primary	0.0942721	0.123313	0.162521	0.448	0.836683
ENSG00000237669.1	HCG4P3	HLA-A	A.11_01_01_01	Yes	conditional on the lead primary SNP eQTL	0.0942721	0.18109	0.239258	0.449122	0.837101
ENSG00000198563.9	DDX39B	HLA-A	A.11_01_01_01	Yes	primary	0.0942721	0.045131	0.061343	0.461903	0.842774
ENSG00000272273.1	XXbac-BPG252P9.10	HLA-A	A.11_01_01_01	Yes	primary	0.0942721	-0.180522	0.245537	0.46221	0.843029
ENSG00000243753.1	HLA-L	HLA-A	A.11_01_01_01	Yes	conditional on the lead primary, conditional 1 and conditional 2 SNP eQTL	0.0942721	-0.176381	0.240338	0.463017	0.843225
ENSG00000204264.4	PSMB8	HLA-A	A.11_01_01_01	Yes	primary	0.0942721	0.136533	0.187347	0.466143	0.844368
ENSG00000198502.5	HLA-DRB5	HLA-A	A.11_01_01_01	Yes	primary	0.0942721	0.179081	0.246956	0.468357	0.845943
ENSG00000213722.4	DDAH2	HLA-A	A.11_01_01_01	Yes	primary	0.0942721	0.1184	0.163425	0.468762	0.84613
ENSG00000254870.1	ATP6V1G2-DDX39B	HLA-A	A.11_01_01_01	Yes	conditional on the lead primary, conditional 1 and conditional 2 SNP eQTL	0.0942721	-0.138199	0.190836	0.468958	0.846216
ENSG00000272540.1	XXbac-BPG252P9.9	HLA-A	A.11_01_01_01	Yes	primary	0.0942721	-0.185073	0.261113	0.478457	0.850189
ENSG00000204592.5	HLA-E	HLA-A	A.11_01_01_01	Yes	primary	0.0942721	0.140202	0.200751	0.484934	0.853601
ENSG00000204520.8	MICA	HLA-A	A.11_01_01_01	Yes	conditional on the lead primary SNP eQTL	0.0942721	0.147859	0.215284	0.492202	0.856889
ENSG00000204538.3	PSORS1C2	HLA-A	A.11_01_01_01	Yes	primary	0.0942721	0.158304	0.230834	0.492844	0.857118
ENSG00000204444.6	APOM	HLA-A	A.11_01_01_01	Yes	conditional on the lead primary, conditional 1 and conditional 2 SNP eQTL	0.0942721	-0.181316	0.266591	0.496424	0.858729
ENSG00000235663.1	SAPCD1-AS1	HLA-A	A.11_01_01_01	Yes	primary	0.0942721	-0.172217	0.259349	0.506668	0.863444
ENSG00000204410.10	MSH5	HLA-A	A.11_01_01_01	Yes	primary	0.0942721	0.126052	0.190052	0.507173	0.863647
ENSG00000254870.1	ATP6V1G2-DDX39B	HLA-A	A.11_01_01_01	Yes	conditional on the lead primary SNP eQTL	0.0942721	-0.119709	0.183758	0.514759	0.866992
ENSG00000204536.9	CCHCR1	HLA-A	A.11_01_01_01	Yes	conditional on the lead primary SNP eQTL	0.0942721	0.144157	0.221491	0.515143	0.867213
ENSG00000204540.6	PSORS1C1	HLA-A	A.11_01_01_01	Yes	primary	0.0942721	0.165641	0.25795	0.52078	0.869523
ENSG00000227507.2	LTB	HLA-A	A.11_01_01_01	Yes	primary	0.0942721	0.116259	0.181051	0.520786	0.869523
ENSG00000204444.6	APOM	HLA-A	A.11_01_01_01	Yes	conditional on the lead primary SNP eQTL	0.0942721	-0.169083	0.264106	0.522037	0.870241
ENSG00000204576.7	PRR3	HLA-A	A.11_01_01_01	Yes	conditional on the lead primary SNP eQTL	0.0942721	-0.137671	0.217609	0.526959	0.872499
ENSG00000228727.4	SAPCD1	HLA-A	A.11_01_01_01	Yes	primary	0.0942721	0.110822	0.175751	0.528325	0.87287
ENSG00000204287.9	HLA-DRA	HLA-A	A.11_01_01_01	Yes	conditional on the lead primary SNP eQTL	0.0942721	-0.147669	0.234901	0.529583	0.873291
ENSG00000204387.8	C6orf48	HLA-A	A.11_01_01_01	Yes	conditional on the lead primary SNP eQTL	0.0942721	0.120649	0.196015	0.538218	0.877308
ENSG00000237042.1	MICG	HLA-A	A.11_01_01_01	Yes	primary	0.0942721	-0.11025	0.179133	0.538248	0.877308
ENSG00000213760.6	ATP6V1G2	HLA-A	A.11_01_01_01	Yes	primary	0.0942721	0.147684	0.240404	0.539006	0.877588
ENSG00000204569.5	PPP1R10	HLA-A	A.11_01_01_01	Yes	primary	0.0942721	0.147678	0.244543	0.545915	0.880833
ENSG00000204516.5	MICB	HLA-A	A.11_01_01_01	Yes	primary	0.0942721	0.117353	0.194428	0.546122	0.880929
ENSG00000204344.10	STK19	HLA-A	A.11_01_01_01	Yes	primary	0.0942721	-0.125068	0.207558	0.546796	0.881408
ENSG00000213780.6	GTF2H4	HLA-A	A.11_01_01_01	Yes	primary	0.0942721	0.132838	0.221143	0.548047	0.882205
ENSG00000204386.6	NEU1	HLA-A	A.11_01_01_01	Yes	primary	0.0942721	-0.122011	0.203658	0.549106	0.882971
ENSG00000250535.1	STK19P	HLA-A	A.11_01_01_01	Yes	primary	0.0942721	0.138074	0.236288	0.558985	0.887152
ENSG00000204305.9	AGER	HLA-A	A.11_01_01_01	Yes	primary	0.0942721	0.113665	0.195597	0.561163	0.887868
ENSG00000229836.1	XXbac-BPG248L24.10	HLA-A	A.11_01_01_01	Yes	conditional on the lead primary SNP eQTL	0.0942721	0.125423	0.219738	0.568146	0.890256
ENSG00000137312.10	FLOT1	HLA-A	A.11_01_01_01	Yes	primary	0.0942721	0.110409	0.19936	0.579704	0.895102
ENSG00000204387.8	C6orf48	HLA-A	A.11_01_01_01	Yes	primary	0.0942721	0.0939261	0.171815	0.584605	0.896756
ENSG00000234745.5	HLA-B	HLA-A	A.11_01_01_01	Yes	conditional on the lead primary SNP eQTL	0.0942721	0.119612	0.219776	0.586272	0.897476
ENSG00000254870.1	ATP6V1G2-DDX39B	HLA-A	A.11_01_01_01	Yes	primary	0.0942721	-0.0992465	0.183623	0.588859	0.898218
ENSG00000223865.6	HLA-DPB1	HLA-A	A.11_01_01_01	Yes	conditional on the lead primary SNP eQTL	0.0942721	0.0979833	0.185029	0.59642	0.901743
ENSG00000204469.8	PRRC2A	HLA-A	A.11_01_01_01	Yes	primary	0.0942721	-0.100255	0.19147	0.600554	0.90351
ENSG00000234745.5	HLA-B	HLA-A	A.11_01_01_01	Yes	conditional on the lead primary and conditional 1 SNP eQTL	0.0942721	0.119461	0.228614	0.601291	0.903779
ENSG00000204428.8	LY6G5C	HLA-A	A.11_01_01_01	Yes	primary	0.0942721	0.123225	0.236853	0.602882	0.904318
ENSG00000213780.6	GTF2H4	HLA-A	A.11_01_01_01	Yes	conditional on the lead primary, conditional 1 and conditional 2 SNP eQTL	0.0942721	0.0989265	0.192384	0.607102	0.9058
ENSG00000234745.5	HLA-B	HLA-A	A.11_01_01_01	Yes	conditional on the lead primary, conditional 1 and conditional 2 SNP eQTL	0.0942721	0.114166	0.224948	0.611788	0.907751
ENSG00000204599.10	TRIM39	HLA-A	A.11_01_01_01	Yes	conditional on the lead primary SNP eQTL	0.0942721	-0.0755121	0.152776	0.621117	0.911261
ENSG00000204421.2	LY6G6C	HLA-A	A.11_01_01_01	Yes	primary	0.0942721	-0.120624	0.252292	0.63257	0.915193
ENSG00000224557.3	HLA-DPB2	HLA-A	A.11_01_01_01	Yes	conditional on the lead primary SNP eQTL	0.0942721	-0.0938063	0.206393	0.649466	0.921355
ENSG00000224557.3	HLA-DPB2	HLA-A	A.11_01_01_01	Yes	conditional on the lead primary and conditional 1 SNP eQTL	0.0942721	-0.09362	0.206662	0.650541	0.921723
ENSG00000234745.5	HLA-B	HLA-A	A.11_01_01_01	Yes	primary	0.0942721	-0.109946	0.244435	0.652858	0.922488
ENSG00000204576.7	PRR3	HLA-A	A.11_01_01_01	Yes	primary	0.0942721	0.0841681	0.188479	0.65519	0.923196
ENSG00000227507.2	LTB	HLA-A	A.11_01_01_01	Yes	conditional on the lead primary, conditional 1 and conditional 2 SNP eQTL	0.0942721	0.103761	0.236137	0.660364	0.924844
ENSG00000204576.7	PRR3	HLA-A	A.11_01_01_01	Yes	conditional on the lead primary, conditional 1 and conditional 2 SNP eQTL	0.0942721	-0.0486968	0.110846	0.660431	0.924844
ENSG00000213780.6	GTF2H4	HLA-A	A.11_01_01_01	Yes	conditional on the lead primary SNP eQTL	0.0942721	0.0834658	0.19331	0.665908	0.926642
ENSG00000200816.1	SNORA38	HLA-A	A.11_01_01_01	Yes	primary	0.0942721	0.0887154	0.205523	0.66599	0.926642
ENSG00000227939.1	RPL3P2	HLA-A	A.11_01_01_01	Yes	primary	0.0942721	-0.0943862	0.218712	0.666066	0.926642
ENSG00000237669.1	HCG4P3	HLA-A	A.11_01_01_01	Yes	conditional on the lead primary and conditional 1 SNP eQTL	0.0942721	0.103135	0.244243	0.672834	0.927911
ENSG00000213719.4	CLIC1	HLA-A	A.11_01_01_01	Yes	conditional on the lead primary and conditional 1 SNP eQTL	0.0942721	0.0687976	0.166132	0.678792	0.929596
ENSG00000272221.1	XXbac-BPG181B23.7	HLA-A	A.11_01_01_01	Yes	primary	0.0942721	0.106927	0.259535	0.680345	0.92992
ENSG00000236603.1	RANP1	HLA-A	A.11_01_01_01	Yes	conditional on the lead primary SNP eQTL	0.0942721	0.0522707	0.129156	0.68569	0.932034
ENSG00000204439.3	C6orf47	HLA-A	A.11_01_01_01	Yes	primary	0.0942721	0.076466	0.194238	0.693823	0.934049
ENSG00000198563.9	DDX39B	HLA-A	A.11_01_01_01	Yes	conditional on the lead primary SNP eQTL	0.0942721	0.0218624	0.0588413	0.710229	0.939273
ENSG00000204388.5	HSPA1B	HLA-A	A.11_01_01_01	Yes	primary	0.0942721	0.0801649	0.218149	0.713262	0.940096
ENSG00000204590.8	GNL1	HLA-A	A.11_01_01_01	Yes	primary	0.0942721	0.0580109	0.170044	0.732989	0.945994
ENSG00000204644.5	ZFP57	HLA-A	A.11_01_01_01	Yes	conditional on the lead primary, conditional 1 and conditional 2 SNP eQTL	0.0942721	0.109148	0.321267	0.734052	0.946215
ENSG00000241106.2	HLA-DOB	HLA-A	A.11_01_01_01	Yes	conditional on the lead primary SNP eQTL	0.0942721	0.0723127	0.215547	0.73726	0.94719
ENSG00000204351.7	SKIV2L	HLA-A	A.11_01_01_01	Yes	primary	0.0942721	-0.0769163	0.233505	0.741854	0.949024
ENSG00000213676.6	ATF6B	HLA-A	A.11_01_01_01	Yes	conditional on the lead primary and conditional 1 SNP eQTL	0.0942721	0.0904754	0.280525	0.747057	0.949965
ENSG00000204520.8	MICA	HLA-A	A.11_01_01_01	Yes	conditional on the lead primary, conditional 1 and conditional 2 SNP eQTL	0.0942721	0.0709916	0.222498	0.749677	0.950633
ENSG00000223865.6	HLA-DPB1	HLA-A	A.11_01_01_01	Yes	primary	0.0942721	0.0685601	0.215599	0.750486	0.950839
ENSG00000204428.8	LY6G5C	HLA-A	A.11_01_01_01	Yes	conditional on the lead primary SNP eQTL	0.0942721	0.067372	0.227326	0.76695	0.95405
ENSG00000236603.1	RANP1	HLA-A	A.11_01_01_01	Yes	primary	0.0942721	0.0394219	0.133968	0.768557	0.954457
ENSG00000240053.8	LY6G5B	HLA-A	A.11_01_01_01	Yes	primary	0.0942721	-0.0484111	0.166245	0.770895	0.954758
ENSG00000231389.3	HLA-DPA1	HLA-A	A.11_01_01_01	Yes	primary	0.0942721	0.0572151	0.223389	0.797856	0.960968
ENSG00000204267.9	TAP2	HLA-A	A.11_01_01_01	Yes	primary	0.0942721	0.0565989	0.229872	0.805512	0.962661
ENSG00000204444.6	APOM	HLA-A	A.11_01_01_01	Yes	primary	0.0942721	-0.0471171	0.193812	0.807922	0.963327
ENSG00000241370.1	RPP21	HLA-A	A.11_01_01_01	Yes	primary	0.0942721	0.0484701	0.205071	0.813155	0.964172
ENSG00000263020.1	CSNK2B-LY6G5B-1181	HLA-A	A.11_01_01_01	Yes	primary	0.0942721	-0.0527835	0.227959	0.816889	0.965177
ENSG00000168477.13	TNXB	HLA-A	A.11_01_01_01	Yes	conditional on the lead primary, conditional 1 and conditional 2 SNP eQTL	0.0942721	-0.068972	0.298363	0.817184	0.965238
ENSG00000227507.2	LTB	HLA-A	A.11_01_01_01	Yes	conditional on the lead primary and conditional 1 SNP eQTL	0.0942721	0.0653977	0.284963	0.818484	0.965482
ENSG00000228962.1	HCG23	HLA-A	A.11_01_01_01	Yes	conditional on the lead primary SNP eQTL	0.0942721	-0.0505898	0.222953	0.820495	0.966011
ENSG00000168477.13	TNXB	HLA-A	A.11_01_01_01	Yes	conditional on the lead primary SNP eQTL	0.0942721	-0.0670483	0.296598	0.821157	0.96607
ENSG00000204435.9	CSNK2B	HLA-A	A.11_01_01_01	Yes	primary	0.0942721	-0.043788	0.197213	0.824287	0.966295
ENSG00000204463.8	BAG6	HLA-A	A.11_01_01_01	Yes	conditional on the lead primary and conditional 1 SNP eQTL	0.0942721	0.0438209	0.198508	0.825286	0.966567
ENSG00000204463.8	BAG6	HLA-A	A.11_01_01_01	Yes	conditional on the lead primary SNP eQTL	0.0942721	0.0400784	0.199412	0.840712	0.970498
ENSG00000213676.6	ATF6B	HLA-A	A.11_01_01_01	Yes	primary	0.0942721	-0.0405374	0.202979	0.841706	0.970935
ENSG00000204520.8	MICA	HLA-A	A.11_01_01_01	Yes	primary	0.0942721	0.0443013	0.226768	0.845111	0.971674
ENSG00000204389.8	HSPA1A	HLA-A	A.11_01_01_01	Yes	primary	0.0942721	-0.0380797	0.212224	0.857599	0.973263
ENSG00000137331.11	IER3	HLA-A	A.11_01_01_01	Yes	primary	0.0942721	-0.0295509	0.166223	0.858897	0.97346
ENSG00000204472.8	AIF1	HLA-A	A.11_01_01_01	Yes	conditional on the lead primary, conditional 1 and conditional 2 SNP eQTL	0.0942721	-0.0360672	0.203246	0.85915	0.973476
ENSG00000204472.8	AIF1	HLA-A	A.11_01_01_01	Yes	conditional on the lead primary SNP eQTL	0.0942721	-0.0335507	0.203094	0.868788	0.975829
ENSG00000272221.1	XXbac-BPG181B23.7	HLA-A	A.11_01_01_01	Yes	conditional on the lead primary and conditional 1 SNP eQTL	0.0942721	-0.0386578	0.23455	0.869088	0.975926
ENSG00000223837.2	BRD2-IT1	HLA-A	A.11_01_01_01	Yes	primary	0.0942721	-0.0402573	0.254751	0.874436	0.977065
ENSG00000230313.1	HCG24	HLA-A	A.11_01_01_01	Yes	conditional on the lead primary and conditional 1 SNP eQTL	0.0942721	0.0505501	0.321495	0.87506	0.977109
ENSG00000196126.6	HLA-DRB1	HLA-A	A.11_01_01_01	Yes	primary	0.0942721	-0.035029	0.247638	0.887513	0.980084
ENSG00000255152.4	MSH5-SAPCD1	HLA-A	A.11_01_01_01	Yes	primary	0.0942721	-0.0318305	0.228065	0.889002	0.980143
ENSG00000137312.10	FLOT1	HLA-A	A.11_01_01_01	Yes	conditional on the lead primary SNP eQTL	0.0942721	-0.0241093	0.193907	0.901051	0.982139
ENSG00000241404.2	EGFL8	HLA-A	A.11_01_01_01	Yes	conditional on the lead primary SNP eQTL	0.0942721	-0.026351	0.21713	0.903405	0.982256
ENSG00000204568.7	MRPS18B	HLA-A	A.11_01_01_01	Yes	primary	0.0942721	-0.0253806	0.210953	0.904234	0.982301
ENSG00000204644.5	ZFP57	HLA-A	A.11_01_01_01	Yes	conditional on the lead primary and conditional 1 SNP eQTL	0.0942721	0.0285735	0.240194	0.905307	0.982425
ENSG00000241404.2	EGFL8	HLA-A	A.11_01_01_01	Yes	conditional on the lead primary and conditional 1 SNP eQTL	0.0942721	-0.0247313	0.217481	0.909462	0.983259
ENSG00000235781.1	XXbac-BPG249D20.9	HLA-A	A.11_01_01_01	Yes	primary	0.0942721	-0.0292276	0.259774	0.910418	0.983263
ENSG00000204472.8	AIF1	HLA-A	A.11_01_01_01	Yes	primary	0.0942721	0.022961	0.207313	0.911811	0.983389
ENSG00000204252.8	HLA-DOA	HLA-A	A.11_01_01_01	Yes	primary	0.0942721	0.0233213	0.220107	0.915619	0.984041
ENSG00000204389.8	HSPA1A	HLA-A	A.11_01_01_01	Yes	conditional on the lead primary, conditional 1 and conditional 2 SNP eQTL	0.0942721	-0.0212519	0.214173	0.920958	0.984751
ENSG00000240053.8	LY6G5B	HLA-A	A.11_01_01_01	Yes	conditional on the lead primary SNP eQTL	0.0942721	-0.014673	0.160034	0.926947	0.985775
ENSG00000196735.7	HLA-DQA1	HLA-A	A.11_01_01_01	Yes	primary	0.0942721	0.0234004	0.258519	0.927876	0.985969
ENSG00000272221.1	XXbac-BPG181B23.7	HLA-A	A.11_01_01_01	Yes	conditional on the lead primary SNP eQTL	0.0942721	0.021553	0.238241	0.927916	0.985978
ENSG00000204536.9	CCHCR1	HLA-A	A.11_01_01_01	Yes	primary	0.0942721	-0.0215032	0.242185	0.92925	0.986045
ENSG00000146112.7	PPP1R18	HLA-A	A.11_01_01_01	Yes	primary	0.0942721	0.0114349	0.177862	0.948739	0.990071
ENSG00000204389.8	HSPA1A	HLA-A	A.11_01_01_01	Yes	conditional on the lead primary SNP eQTL	0.0942721	0.0153232	0.240449	0.949187	0.990182
ENSG00000244355.3	LY6G6D	HLA-A	A.11_01_01_01	Yes	primary	0.0942721	-0.0121325	0.242985	0.960177	0.992555
ENSG00000204308.6	RNF5	HLA-A	A.11_01_01_01	Yes	conditional on the lead primary and conditional 1 SNP eQTL	0.0942721	0.00607755	0.218874	0.977848	0.996171
ENSG00000243753.1	HLA-L	HLA-A	A.11_01_01_01	Yes	conditional on the lead primary SNP eQTL	0.0942721	0.00600214	0.238071	0.979886	0.996813
ENSG00000241404.2	EGFL8	HLA-A	A.11_01_01_01	Yes	primary	0.0942721	-0.00374359	0.224214	0.986679	0.99786
ENSG00000204644.5	ZFP57	HLA-A	A.11_01_01_01	Yes	conditional on the lead primary SNP eQTL	0.0942721	-0.00314984	0.226666	0.988913	0.998575
ENSG00000204520.8	MICA	HLA-A	A.11_01_01_01	Yes	conditional on the lead primary and conditional 1 SNP eQTL	0.0942721	0.00196741	0.21626	0.992741	0.998962
ENSG00000213719.4	CLIC1	HLA-A	A.11_01_01_01	Yes	conditional on the lead primary SNP eQTL	0.0942721	0.00111422	0.164176	0.994585	0.99923
ENSG00000204580.7	DDR1	HLA-A	A.11_01_01_01	Yes	primary	0.0942721	0.000339155	0.159886	0.998308	0.999728
ENSG00000206341.6	HLA-H	HLA-A	A.23_01_01_01	Yes	conditional on the lead primary and conditional 1 SNP eQTL	0.0167064	2.18519	0.423688	2.50188e-07	4.30746e-05
ENSG00000206341.6	HLA-H	HLA-A	A.23_01_01_01	Yes	conditional on the lead primary SNP eQTL	0.0167064	2.18405	0.423534	2.51294e-07	4.31664e-05
ENSG00000206341.6	HLA-H	HLA-A	A.23_01_01_01	Yes	primary	0.0167064	2.36849	0.518156	4.8542e-06	0.000562744
ENSG00000206341.6	HLA-H	HLA-A	A.23_01_01_01	Yes	conditional on the lead primary, conditional 1 and conditional 2 SNP eQTL	0.0167064	2.27891	0.51646	1.02155e-05	0.00109176
ENSG00000230795.2	HLA-K	HLA-A	A.23_01_01_01	Yes	conditional on the lead primary SNP eQTL	0.0167064	-1.91207	0.447187	1.9047e-05	0.00187573
ENSG00000204644.5	ZFP57	HLA-A	A.23_01_01_01	Yes	conditional on the lead primary, conditional 1 and conditional 2 SNP eQTL	0.0167064	2.74897	0.656927	2.85678e-05	0.00261561
ENSG00000230795.2	HLA-K	HLA-A	A.23_01_01_01	Yes	primary	0.0167064	-2.03146	0.496329	4.25905e-05	0.00364553
ENSG00000204315.3	FKBPL	HLA-A	A.23_01_01_01	Yes	primary	0.0167064	-1.52781	0.374776	4.57001e-05	0.00388079
ENSG00000204644.5	ZFP57	HLA-A	A.23_01_01_01	Yes	conditional on the lead primary SNP eQTL	0.0167064	1.58818	0.439201	0.000299127	0.0168582
ENSG00000176998.3	HCG4	HLA-A	A.23_01_01_01	Yes	conditional on the lead primary SNP eQTL	0.0167064	-1.51689	0.438086	0.000535094	0.0260232
ENSG00000204644.5	ZFP57	HLA-A	A.23_01_01_01	Yes	conditional on the lead primary and conditional 1 SNP eQTL	0.0167064	1.60605	0.466394	0.000574113	0.0272696
ENSG00000204644.5	ZFP57	HLA-A	A.23_01_01_01	Yes	primary	0.0167064	1.5911	0.462236	0.000577069	0.0273588
ENSG00000204618.4	RNF39	HLA-A	A.23_01_01_01	Yes	primary	0.0167064	1.47302	0.469872	0.00171892	0.0588122
ENSG00000214922.5	HLA-F-AS1	HLA-A	A.23_01_01_01	Yes	conditional on the lead primary and conditional 1 SNP eQTL	0.0167064	1.62056	0.518925	0.00179068	0.0605242
ENSG00000214922.5	HLA-F-AS1	HLA-A	A.23_01_01_01	Yes	conditional on the lead primary, conditional 1 and conditional 2 SNP eQTL	0.0167064	1.62219	0.522476	0.00190394	0.0631515
ENSG00000230795.2	HLA-K	HLA-A	A.23_01_01_01	Yes	conditional on the lead primary and conditional 1 SNP eQTL	0.0167064	-1.68173	0.546091	0.00207287	0.0669352
ENSG00000237669.1	HCG4P3	HLA-A	A.23_01_01_01	Yes	conditional on the lead primary SNP eQTL	0.0167064	-1.41825	0.467243	0.00240244	0.0738376
ENSG00000237669.1	HCG4P3	HLA-A	A.23_01_01_01	Yes	conditional on the lead primary, conditional 1 and conditional 2 SNP eQTL	0.0167064	-1.39752	0.467824	0.00281468	0.0816073
ENSG00000137312.10	FLOT1	HLA-A	A.23_01_01_01	Yes	primary	0.0167064	-1.13919	0.392225	0.00367923	0.0965699
ENSG00000137312.10	FLOT1	HLA-A	A.23_01_01_01	Yes	conditional on the lead primary SNP eQTL	0.0167064	-1.04529	0.377603	0.00563617	0.125869
ENSG00000137310.7	TCF19	HLA-A	A.23_01_01_01	Yes	primary	0.0167064	-1.04029	0.379923	0.00617852	0.132969
ENSG00000227766.1	HCG4P5	HLA-A	A.23_01_01_01	Yes	conditional on the lead primary SNP eQTL	0.0167064	1.26229	0.462885	0.00639096	0.135728
ENSG00000214922.5	HLA-F-AS1	HLA-A	A.23_01_01_01	Yes	conditional on the lead primary SNP eQTL	0.0167064	1.11134	0.410141	0.00673513	0.13929
ENSG00000204599.10	TRIM39	HLA-A	A.23_01_01_01	Yes	conditional on the lead primary SNP eQTL	0.0167064	-0.760516	0.284726	0.00756152	0.149008
ENSG00000227766.1	HCG4P5	HLA-A	A.23_01_01_01	Yes	conditional on the lead primary and conditional 1 SNP eQTL	0.0167064	1.26296	0.489414	0.00986448	0.174426
ENSG00000237669.1	HCG4P3	HLA-A	A.23_01_01_01	Yes	primary	0.0167064	-1.31337	0.518995	0.0113869	0.188292
ENSG00000204599.10	TRIM39	HLA-A	A.23_01_01_01	Yes	primary	0.0167064	-0.73136	0.297434	0.0139364	0.211529
ENSG00000176998.3	HCG4	HLA-A	A.23_01_01_01	Yes	primary	0.0167064	-1.13544	0.478494	0.0176474	0.240523
ENSG00000204536.9	CCHCR1	HLA-A	A.23_01_01_01	Yes	conditional on the lead primary SNP eQTL	0.0167064	1.0079	0.433931	0.0201942	0.256035
ENSG00000137310.7	TCF19	HLA-A	A.23_01_01_01	Yes	conditional on the lead primary and conditional 1 SNP eQTL	0.0167064	-0.819328	0.3636	0.0242353	0.280149
ENSG00000204315.3	FKBPL	HLA-A	A.23_01_01_01	Yes	conditional on the lead primary SNP eQTL	0.0167064	-0.915114	0.407275	0.0246451	0.281972
ENSG00000137310.7	TCF19	HLA-A	A.23_01_01_01	Yes	conditional on the lead primary SNP eQTL	0.0167064	-0.80058	0.364212	0.0279411	0.298231
ENSG00000236603.1	RANP1	HLA-A	A.23_01_01_01	Yes	primary	0.0167064	-0.568962	0.260291	0.0288252	0.302517
ENSG00000204348.5	DXO	HLA-A	A.23_01_01_01	Yes	conditional on the lead primary SNP eQTL	0.0167064	-0.83573	0.383037	0.0291205	0.303879
ENSG00000204315.3	FKBPL	HLA-A	A.23_01_01_01	Yes	conditional on the lead primary and conditional 1 SNP eQTL	0.0167064	-0.863463	0.402198	0.0318044	0.317375
ENSG00000236603.1	RANP1	HLA-A	A.23_01_01_01	Yes	conditional on the lead primary SNP eQTL	0.0167064	-0.508078	0.251095	0.0430269	0.362231
ENSG00000239257.1	RPL23AP1	HLA-A	A.23_01_01_01	Yes	primary	0.0167064	-0.993805	0.493844	0.0441794	0.365955
ENSG00000204421.2	LY6G6C	HLA-A	A.23_01_01_01	Yes	primary	0.0167064	-0.982084	0.490122	0.0450966	0.36827
ENSG00000214922.5	HLA-F-AS1	HLA-A	A.23_01_01_01	Yes	primary	0.0167064	0.880864	0.448435	0.0494947	0.384844
ENSG00000206337.6	HCP5	HLA-A	A.23_01_01_01	Yes	primary	0.0167064	-0.858643	0.443296	0.0527512	0.396695
ENSG00000204564.7	C6orf136	HLA-A	A.23_01_01_01	Yes	primary	0.0167064	-0.90445	0.473761	0.0562509	0.405695
ENSG00000204576.7	PRR3	HLA-A	A.23_01_01_01	Yes	primary	0.0167064	-0.700182	0.36699	0.0564038	0.406135
ENSG00000204444.6	APOM	HLA-A	A.23_01_01_01	Yes	primary	0.0167064	-0.705279	0.376932	0.0613307	0.420025
ENSG00000204439.3	C6orf47	HLA-A	A.23_01_01_01	Yes	conditional on the lead primary SNP eQTL	0.0167064	-0.671896	0.36995	0.0693429	0.441192
ENSG00000237669.1	HCG4P3	HLA-A	A.23_01_01_01	Yes	conditional on the lead primary and conditional 1 SNP eQTL	0.0167064	-1.04999	0.583728	0.0720555	0.449267
ENSG00000227766.1	HCG4P5	HLA-A	A.23_01_01_01	Yes	primary	0.0167064	0.874231	0.501097	0.0810484	0.471682
ENSG00000235781.1	XXbac-BPG249D20.9	HLA-A	A.23_01_01_01	Yes	primary	0.0167064	-0.881816	0.507816	0.0824779	0.475224
ENSG00000204371.7	EHMT2	HLA-A	A.23_01_01_01	Yes	primary	0.0167064	0.616216	0.3561	0.0835481	0.477732
ENSG00000204310.6	AGPAT1	HLA-A	A.23_01_01_01	Yes	conditional on the lead primary SNP eQTL	0.0167064	0.641007	0.371193	0.0841888	0.479645
ENSG00000204264.4	PSMB8	HLA-A	A.23_01_01_01	Yes	primary	0.0167064	0.642915	0.373299	0.0850244	0.481706
ENSG00000204348.5	DXO	HLA-A	A.23_01_01_01	Yes	primary	0.0167064	-0.722606	0.42059	0.0857824	0.483561
ENSG00000241404.2	EGFL8	HLA-A	A.23_01_01_01	Yes	conditional on the lead primary SNP eQTL	0.0167064	-0.725393	0.422871	0.0862718	0.484469
ENSG00000241404.2	EGFL8	HLA-A	A.23_01_01_01	Yes	conditional on the lead primary and conditional 1 SNP eQTL	0.0167064	-0.725286	0.423347	0.0866727	0.485628
ENSG00000204351.7	SKIV2L	HLA-A	A.23_01_01_01	Yes	primary	0.0167064	0.772306	0.456343	0.0905735	0.494421
ENSG00000204387.8	C6orf48	HLA-A	A.23_01_01_01	Yes	conditional on the lead primary SNP eQTL	0.0167064	0.692584	0.409772	0.0909959	0.495212
ENSG00000204536.9	CCHCR1	HLA-A	A.23_01_01_01	Yes	primary	0.0167064	0.803953	0.478592	0.0929906	0.498402
ENSG00000204439.3	C6orf47	HLA-A	A.23_01_01_01	Yes	primary	0.0167064	-0.634974	0.383102	0.0974272	0.507308
ENSG00000204498.6	NFKBIL1	HLA-A	A.23_01_01_01	Yes	primary	0.0167064	-0.590467	0.357668	0.0987631	0.509898
ENSG00000204356.7	NELFE	HLA-A	A.23_01_01_01	Yes	primary	0.0167064	0.687111	0.421195	0.102819	0.517727
ENSG00000204385.6	SLC44A4	HLA-A	A.23_01_01_01	Yes	conditional on the lead primary and conditional 1 SNP eQTL	0.0167064	-0.607099	0.374607	0.105097	0.523525
ENSG00000204538.3	PSORS1C2	HLA-A	A.23_01_01_01	Yes	primary	0.0167064	0.748252	0.463302	0.106301	0.525236
ENSG00000168394.9	TAP1	HLA-A	A.23_01_01_01	Yes	primary	0.0167064	0.74378	0.462913	0.108112	0.528224
ENSG00000168394.9	TAP1	HLA-A	A.23_01_01_01	Yes	conditional on the lead primary and conditional 1 SNP eQTL	0.0167064	0.728974	0.45434	0.108611	0.528892
ENSG00000204304.7	PBX2	HLA-A	A.23_01_01_01	Yes	primary	0.0167064	0.609926	0.380589	0.109027	0.529298
ENSG00000204315.3	FKBPL	HLA-A	A.23_01_01_01	Yes	conditional on the lead primary, conditional 1 and conditional 2 SNP eQTL	0.0167064	-0.63619	0.397461	0.109458	0.529894
ENSG00000204385.6	SLC44A4	HLA-A	A.23_01_01_01	Yes	conditional on the lead primary SNP eQTL	0.0167064	-0.595491	0.374166	0.111494	0.532615
ENSG00000168394.9	TAP1	HLA-A	A.23_01_01_01	Yes	conditional on the lead primary SNP eQTL	0.0167064	0.689323	0.439164	0.116502	0.541684
ENSG00000196735.7	HLA-DQA1	HLA-A	A.23_01_01_01	Yes	primary	0.0167064	0.81172	0.520275	0.118719	0.54471
ENSG00000237042.1	MICG	HLA-A	A.23_01_01_01	Yes	primary	0.0167064	0.537347	0.350761	0.125536	0.555986
ENSG00000196230.8	TUBB	HLA-A	A.23_01_01_01	Yes	primary	0.0167064	-0.370239	0.243352	0.128157	0.560627
ENSG00000204531.11	POU5F1	HLA-A	A.23_01_01_01	Yes	primary	0.0167064	0.371645	0.244276	0.128157	0.560627
ENSG00000204516.5	MICB	HLA-A	A.23_01_01_01	Yes	primary	0.0167064	-0.589151	0.390557	0.13143	0.564964
ENSG00000198563.9	DDX39B	HLA-A	A.23_01_01_01	Yes	conditional on the lead primary SNP eQTL	0.0167064	0.172832	0.117672	0.141896	0.580027
ENSG00000204538.3	PSORS1C2	HLA-A	A.23_01_01_01	Yes	conditional on the lead primary SNP eQTL	0.0167064	0.626366	0.427496	0.142867	0.581532
ENSG00000204304.7	PBX2	HLA-A	A.23_01_01_01	Yes	conditional on the lead primary SNP eQTL	0.0167064	0.703083	0.48167	0.144379	0.583831
ENSG00000179344.12	HLA-DQB1	HLA-A	A.23_01_01_01	Yes	conditional on the lead primary SNP eQTL	0.0167064	0.63817	0.441147	0.148004	0.588712
ENSG00000204310.6	AGPAT1	HLA-A	A.23_01_01_01	Yes	primary	0.0167064	0.581444	0.407442	0.153563	0.596224
ENSG00000204642.9	HLA-F	HLA-A	A.23_01_01_01	Yes	conditional on the lead primary and conditional 1 SNP eQTL	0.0167064	0.599405	0.422356	0.155842	0.598704
ENSG00000204314.6	PRRT1	HLA-A	A.23_01_01_01	Yes	primary	0.0167064	-0.598701	0.428945	0.162789	0.607657
ENSG00000204310.6	AGPAT1	HLA-A	A.23_01_01_01	Yes	conditional on the lead primary and conditional 1 SNP eQTL	0.0167064	0.539804	0.387256	0.163341	0.608478
ENSG00000231389.3	HLA-DPA1	HLA-A	A.23_01_01_01	Yes	primary	0.0167064	-0.645771	0.464584	0.16453	0.610248
ENSG00000272273.1	XXbac-BPG252P9.10	HLA-A	A.23_01_01_01	Yes	primary	0.0167064	-0.66243	0.477622	0.165462	0.611585
ENSG00000204392.6	LSM2	HLA-A	A.23_01_01_01	Yes	primary	0.0167064	-0.558975	0.408484	0.171182	0.618845
ENSG00000204389.8	HSPA1A	HLA-A	A.23_01_01_01	Yes	conditional on the lead primary SNP eQTL	0.0167064	-0.686895	0.50412	0.173021	0.621509
ENSG00000241404.2	EGFL8	HLA-A	A.23_01_01_01	Yes	primary	0.0167064	-0.590447	0.436585	0.176241	0.62627
ENSG00000204310.6	AGPAT1	HLA-A	A.23_01_01_01	Yes	conditional on the lead primary, conditional 1 and conditional 2 SNP eQTL	0.0167064	0.52721	0.394672	0.181608	0.633347
ENSG00000234745.5	HLA-B	HLA-A	A.23_01_01_01	Yes	primary	0.0167064	-0.636678	0.477765	0.182657	0.634594
ENSG00000204305.9	AGER	HLA-A	A.23_01_01_01	Yes	primary	0.0167064	-0.505859	0.381046	0.184326	0.636922
ENSG00000166278.10	C2	HLA-A	A.23_01_01_01	Yes	primary	0.0167064	-0.595554	0.453648	0.189247	0.641462
ENSG00000243753.1	HLA-L	HLA-A	A.23_01_01_01	Yes	conditional on the lead primary, conditional 1 and conditional 2 SNP eQTL	0.0167064	-0.57408	0.447209	0.199248	0.653374
ENSG00000204389.8	HSPA1A	HLA-A	A.23_01_01_01	Yes	conditional on the lead primary, conditional 1 and conditional 2 SNP eQTL	0.0167064	-0.526723	0.418082	0.207722	0.662452
ENSG00000213780.6	GTF2H4	HLA-A	A.23_01_01_01	Yes	conditional on the lead primary, conditional 1 and conditional 2 SNP eQTL	0.0167064	-0.475326	0.379273	0.210112	0.664679
ENSG00000204385.6	SLC44A4	HLA-A	A.23_01_01_01	Yes	primary	0.0167064	-0.494441	0.397843	0.21394	0.668174
ENSG00000204388.5	HSPA1B	HLA-A	A.23_01_01_01	Yes	conditional on the lead primary and conditional 1 SNP eQTL	0.0167064	0.75559	0.608181	0.214098	0.668174
ENSG00000204642.9	HLA-F	HLA-A	A.23_01_01_01	Yes	conditional on the lead primary, conditional 1 and conditional 2 SNP eQTL	0.0167064	0.527306	0.431031	0.221194	0.675139
ENSG00000204525.10	HLA-C	HLA-A	A.23_01_01_01	Yes	conditional on the lead primary SNP eQTL	0.0167064	-0.511835	0.420675	0.223719	0.677684
ENSG00000204482.6	LST1	HLA-A	A.23_01_01_01	Yes	primary	0.0167064	0.616201	0.50845	0.225543	0.679581
ENSG00000272221.1	XXbac-BPG181B23.7	HLA-A	A.23_01_01_01	Yes	primary	0.0167064	-0.623657	0.518169	0.228753	0.681591
ENSG00000227507.2	LTB	HLA-A	A.23_01_01_01	Yes	conditional on the lead primary and conditional 1 SNP eQTL	0.0167064	-0.682918	0.567568	0.228885	0.681636
ENSG00000213780.6	GTF2H4	HLA-A	A.23_01_01_01	Yes	primary	0.0167064	-0.520153	0.433066	0.229715	0.682432
ENSG00000270604.1	HCG17	HLA-A	A.23_01_01_01	Yes	conditional on the lead primary SNP eQTL	0.0167064	0.797207	0.668752	0.233229	0.685707
ENSG00000204444.6	APOM	HLA-A	A.23_01_01_01	Yes	conditional on the lead primary SNP eQTL	0.0167064	-0.521521	0.440966	0.236937	0.689017
ENSG00000223865.6	HLA-DPB1	HLA-A	A.23_01_01_01	Yes	primary	0.0167064	0.502378	0.426274	0.238585	0.690551
ENSG00000213780.6	GTF2H4	HLA-A	A.23_01_01_01	Yes	conditional on the lead primary SNP eQTL	0.0167064	-0.447681	0.381301	0.24036	0.692378
ENSG00000263756.1	XXbac-BPG181M17.6	HLA-A	A.23_01_01_01	Yes	primary	0.0167064	0.598979	0.52144	0.250679	0.702237
ENSG00000230313.1	HCG24	HLA-A	A.23_01_01_01	Yes	conditional on the lead primary and conditional 1 SNP eQTL	0.0167064	0.748421	0.666223	0.261276	0.712553
ENSG00000219797.2	PPIAP9	HLA-A	A.23_01_01_01	Yes	primary	0.0167064	0.563624	0.503471	0.262937	0.713631
ENSG00000204463.8	BAG6	HLA-A	A.23_01_01_01	Yes	conditional on the lead primary SNP eQTL	0.0167064	0.423454	0.383198	0.269137	0.718596
ENSG00000204525.10	HLA-C	HLA-A	A.23_01_01_01	Yes	conditional on the lead primary and conditional 1 SNP eQTL	0.0167064	-0.46006	0.420418	0.273827	0.722144
ENSG00000204619.3	PPP1R11	HLA-A	A.23_01_01_01	Yes	primary	0.0167064	-0.485698	0.444118	0.27412	0.722324
ENSG00000227507.2	LTB	HLA-A	A.23_01_01_01	Yes	conditional on the lead primary, conditional 1 and conditional 2 SNP eQTL	0.0167064	0.514753	0.475144	0.278648	0.725732
ENSG00000219797.2	PPIAP9	HLA-A	A.23_01_01_01	Yes	conditional on the lead primary SNP eQTL	0.0167064	0.510949	0.476074	0.283157	0.729405
ENSG00000204252.8	HLA-DOA	HLA-A	A.23_01_01_01	Yes	primary	0.0167064	-0.482635	0.45743	0.291379	0.737202
ENSG00000223865.6	HLA-DPB1	HLA-A	A.23_01_01_01	Yes	conditional on the lead primary, conditional 1 and conditional 2 SNP eQTL	0.0167064	0.412188	0.391569	0.292497	0.738239
ENSG00000204386.6	NEU1	HLA-A	A.23_01_01_01	Yes	primary	0.0167064	-0.421496	0.402713	0.295265	0.740611
ENSG00000235663.1	SAPCD1-AS1	HLA-A	A.23_01_01_01	Yes	primary	0.0167064	-0.53215	0.511065	0.297756	0.742524
ENSG00000204435.9	CSNK2B	HLA-A	A.23_01_01_01	Yes	primary	0.0167064	-0.404124	0.391319	0.301734	0.745086
ENSG00000146112.7	PPP1R18	HLA-A	A.23_01_01_01	Yes	primary	0.0167064	-0.360382	0.349383	0.302315	0.745548
ENSG00000241106.2	HLA-DOB	HLA-A	A.23_01_01_01	Yes	conditional on the lead primary SNP eQTL	0.0167064	0.44514	0.434698	0.305825	0.747745
ENSG00000204394.8	VARS	HLA-A	A.23_01_01_01	Yes	primary	0.0167064	0.378572	0.378718	0.317498	0.755172
ENSG00000204389.8	HSPA1A	HLA-A	A.23_01_01_01	Yes	primary	0.0167064	-0.422509	0.422847	0.317698	0.755223
ENSG00000204568.7	MRPS18B	HLA-A	A.23_01_01_01	Yes	primary	0.0167064	-0.410607	0.417092	0.324894	0.761155
ENSG00000224328.1	MDC1-AS1	HLA-A	A.23_01_01_01	Yes	primary	0.0167064	0.510972	0.521314	0.327006	0.762233
ENSG00000204569.5	PPP1R10	HLA-A	A.23_01_01_01	Yes	primary	0.0167064	0.471938	0.48419	0.329711	0.764602
ENSG00000228727.4	SAPCD1	HLA-A	A.23_01_01_01	Yes	primary	0.0167064	-0.336797	0.347733	0.332769	0.766534
ENSG00000204642.9	HLA-F	HLA-A	A.23_01_01_01	Yes	conditional on the lead primary SNP eQTL	0.0167064	0.419417	0.433823	0.333648	0.76735
ENSG00000137343.13	ATAT1	HLA-A	A.23_01_01_01	Yes	primary	0.0167064	-0.374885	0.387901	0.333822	0.76735
ENSG00000227939.1	RPL3P2	HLA-A	A.23_01_01_01	Yes	primary	0.0167064	-0.418905	0.434895	0.335431	0.768551
ENSG00000204444.6	APOM	HLA-A	A.23_01_01_01	Yes	conditional on the lead primary, conditional 1 and conditional 2 SNP eQTL	0.0167064	-0.427057	0.444002	0.336132	0.769
ENSG00000204301.5	NOTCH4	HLA-A	A.23_01_01_01	Yes	primary	0.0167064	-0.415174	0.435327	0.340232	0.771661
ENSG00000204366.3	ZBTB12	HLA-A	A.23_01_01_01	Yes	primary	0.0167064	0.287105	0.302756	0.342975	0.773381
ENSG00000204520.8	MICA	HLA-A	A.23_01_01_01	Yes	conditional on the lead primary and conditional 1 SNP eQTL	0.0167064	-0.415588	0.443928	0.349191	0.777437
ENSG00000206344.6	HCG27	HLA-A	A.23_01_01_01	Yes	primary	0.0167064	-0.443068	0.490203	0.366078	0.788607
ENSG00000137404.10	NRM	HLA-A	A.23_01_01_01	Yes	primary	0.0167064	-0.356575	0.399044	0.371549	0.791822
ENSG00000223865.6	HLA-DPB1	HLA-A	A.23_01_01_01	Yes	conditional on the lead primary SNP eQTL	0.0167064	0.343386	0.389388	0.377852	0.79568
ENSG00000243753.1	HLA-L	HLA-A	A.23_01_01_01	Yes	primary	0.0167064	-0.405874	0.460424	0.378035	0.795753
ENSG00000204482.6	LST1	HLA-A	A.23_01_01_01	Yes	conditional on the lead primary SNP eQTL	0.0167064	0.428362	0.487027	0.379106	0.79643
ENSG00000231074.4	HCG18	HLA-A	A.23_01_01_01	Yes	primary	0.0167064	-0.270844	0.308036	0.379259	0.796501
ENSG00000204257.10	HLA-DMA	HLA-A	A.23_01_01_01	Yes	conditional on the lead primary and conditional 1 SNP eQTL	0.0167064	-0.67724	0.78048	0.385547	0.800551
ENSG00000200816.1	SNORA38	HLA-A	A.23_01_01_01	Yes	primary	0.0167064	0.345151	0.401787	0.390319	0.803857
ENSG00000204475.5	NCR3	HLA-A	A.23_01_01_01	Yes	primary	0.0167064	0.390647	0.461076	0.396856	0.808299
ENSG00000224389.4	C4B	HLA-A	A.23_01_01_01	Yes	primary	0.0167064	-0.390153	0.46606	0.402519	0.811292
ENSG00000213676.6	ATF6B	HLA-A	A.23_01_01_01	Yes	conditional on the lead primary SNP eQTL	0.0167064	0.414233	0.499357	0.406803	0.813619
ENSG00000243753.1	HLA-L	HLA-A	A.23_01_01_01	Yes	conditional on the lead primary SNP eQTL	0.0167064	-0.363124	0.440955	0.410227	0.815598
ENSG00000204538.3	PSORS1C2	HLA-A	A.23_01_01_01	Yes	conditional on the lead primary and conditional 1 SNP eQTL	0.0167064	0.372564	0.453898	0.411755	0.81691
ENSG00000204257.10	HLA-DMA	HLA-A	A.23_01_01_01	Yes	conditional on the lead primary SNP eQTL	0.0167064	-0.589367	0.732332	0.420946	0.821592
ENSG00000204632.7	HLA-G	HLA-A	A.23_01_01_01	Yes	primary	0.0167064	-0.390711	0.489971	0.425208	0.823539
ENSG00000204592.5	HLA-E	HLA-A	A.23_01_01_01	Yes	primary	0.0167064	-0.332277	0.419604	0.42843	0.825163
ENSG00000204371.7	EHMT2	HLA-A	A.23_01_01_01	Yes	conditional on the lead primary SNP eQTL	0.0167064	0.260851	0.342079	0.445735	0.835731
ENSG00000272540.1	XXbac-BPG252P9.9	HLA-A	A.23_01_01_01	Yes	primary	0.0167064	0.395628	0.522057	0.448556	0.836849
ENSG00000204371.7	EHMT2	HLA-A	A.23_01_01_01	Yes	conditional on the lead primary, conditional 1 and conditional 2 SNP eQTL	0.0167064	0.258795	0.342848	0.450345	0.837279
ENSG00000272221.1	XXbac-BPG181B23.7	HLA-A	A.23_01_01_01	Yes	conditional on the lead primary and conditional 1 SNP eQTL	0.0167064	-0.349791	0.46743	0.454262	0.839226
ENSG00000272221.1	XXbac-BPG181B23.7	HLA-A	A.23_01_01_01	Yes	conditional on the lead primary SNP eQTL	0.0167064	-0.354971	0.475982	0.45581	0.839779
ENSG00000204520.8	MICA	HLA-A	A.23_01_01_01	Yes	conditional on the lead primary, conditional 1 and conditional 2 SNP eQTL	0.0167064	-0.340114	0.457062	0.456797	0.840297
ENSG00000066379.10	ZNRD1	HLA-A	A.23_01_01_01	Yes	conditional on the lead primary SNP eQTL	0.0167064	0.36778	0.504285	0.465812	0.844216
ENSG00000179344.12	HLA-DQB1	HLA-A	A.23_01_01_01	Yes	primary	0.0167064	0.351824	0.486965	0.469997	0.846669
ENSG00000234745.5	HLA-B	HLA-A	A.23_01_01_01	Yes	conditional on the lead primary SNP eQTL	0.0167064	-0.320513	0.446382	0.472743	0.847689
ENSG00000213719.4	CLIC1	HLA-A	A.23_01_01_01	Yes	primary	0.0167064	-0.237987	0.332216	0.473768	0.848176
ENSG00000204261.4	TAPSAR1	HLA-A	A.23_01_01_01	Yes	primary	0.0167064	0.345874	0.483761	0.474629	0.848403
ENSG00000229836.1	XXbac-BPG248L24.10	HLA-A	A.23_01_01_01	Yes	primary	0.0167064	-0.314386	0.440139	0.475049	0.84861
ENSG00000137337.10	MDC1	HLA-A	A.23_01_01_01	Yes	primary	0.0167064	0.293446	0.415416	0.479946	0.851175
ENSG00000204469.8	PRRC2A	HLA-A	A.23_01_01_01	Yes	primary	0.0167064	-0.255376	0.38072	0.502367	0.861543
ENSG00000204580.7	DDR1	HLA-A	A.23_01_01_01	Yes	primary	0.0167064	-0.208939	0.318194	0.511412	0.865395
ENSG00000230313.1	HCG24	HLA-A	A.23_01_01_01	Yes	conditional on the lead primary SNP eQTL	0.0167064	-0.29011	0.447758	0.517039	0.868005
ENSG00000204387.8	C6orf48	HLA-A	A.23_01_01_01	Yes	primary	0.0167064	0.220238	0.341191	0.518604	0.868588
ENSG00000204287.9	HLA-DRA	HLA-A	A.23_01_01_01	Yes	conditional on the lead primary SNP eQTL	0.0167064	-0.296341	0.459779	0.519232	0.868756
ENSG00000244731.3	C4A	HLA-A	A.23_01_01_01	Yes	primary	0.0167064	-0.314395	0.490594	0.521623	0.870062
ENSG00000137411.12	VARS2	HLA-A	A.23_01_01_01	Yes	primary	0.0167064	0.242933	0.385343	0.528411	0.872889
ENSG00000254870.1	ATP6V1G2-DDX39B	HLA-A	A.23_01_01_01	Yes	conditional on the lead primary SNP eQTL	0.0167064	0.210442	0.339619	0.535493	0.875777
ENSG00000228962.1	HCG23	HLA-A	A.23_01_01_01	Yes	primary	0.0167064	-0.302977	0.491817	0.537871	0.877308
ENSG00000204525.10	HLA-C	HLA-A	A.23_01_01_01	Yes	primary	0.0167064	-0.278191	0.45847	0.543996	0.879566
ENSG00000234127.4	TRIM26	HLA-A	A.23_01_01_01	Yes	primary	0.0167064	0.209764	0.346599	0.545042	0.880152
ENSG00000204410.10	MSH5	HLA-A	A.23_01_01_01	Yes	primary	0.0167064	-0.228125	0.377138	0.545256	0.880249
ENSG00000237923.1	XXbac-BPG27H4.8	HLA-A	A.23_01_01_01	Yes	primary	0.0167064	0.215707	0.36519	0.554741	0.885904
ENSG00000223865.6	HLA-DPB1	HLA-A	A.23_01_01_01	Yes	conditional on the lead primary and conditional 1 SNP eQTL	0.0167064	0.223498	0.378777	0.555157	0.885957
ENSG00000206344.6	HCG27	HLA-A	A.23_01_01_01	Yes	conditional on the lead primary SNP eQTL	0.0167064	-0.295259	0.51353	0.565318	0.889164
ENSG00000204520.8	MICA	HLA-A	A.23_01_01_01	Yes	conditional on the lead primary SNP eQTL	0.0167064	-0.246103	0.438486	0.574622	0.893244
ENSG00000168477.13	TNXB	HLA-A	A.23_01_01_01	Yes	primary	0.0167064	-0.230253	0.414548	0.578599	0.89489
ENSG00000242574.4	HLA-DMB	HLA-A	A.23_01_01_01	Yes	conditional on the lead primary SNP eQTL	0.0167064	0.256287	0.472517	0.587552	0.897844
ENSG00000204428.8	LY6G5C	HLA-A	A.23_01_01_01	Yes	conditional on the lead primary SNP eQTL	0.0167064	-0.23619	0.445392	0.595906	0.901601
ENSG00000229836.1	XXbac-BPG248L24.10	HLA-A	A.23_01_01_01	Yes	conditional on the lead primary SNP eQTL	0.0167064	-0.213481	0.427406	0.61744	0.910257
ENSG00000244355.3	LY6G6D	HLA-A	A.23_01_01_01	Yes	primary	0.0167064	0.235558	0.474026	0.619237	0.910783
ENSG00000204256.8	BRD2	HLA-A	A.23_01_01_01	Yes	primary	0.0167064	0.183569	0.374644	0.624146	0.912113
ENSG00000204257.10	HLA-DMA	HLA-A	A.23_01_01_01	Yes	primary	0.0167064	-0.234857	0.483063	0.626838	0.912852
ENSG00000234127.4	TRIM26	HLA-A	A.23_01_01_01	Yes	conditional on the lead primary SNP eQTL	0.0167064	-0.159071	0.327279	0.626939	0.912867
ENSG00000204576.7	PRR3	HLA-A	A.23_01_01_01	Yes	conditional on the lead primary, conditional 1 and conditional 2 SNP eQTL	0.0167064	-0.192759	0.400867	0.630619	0.914585
ENSG00000196126.6	HLA-DRB1	HLA-A	A.23_01_01_01	Yes	primary	0.0167064	0.248918	0.527813	0.63721	0.917175
ENSG00000224389.4	C4B	HLA-A	A.23_01_01_01	Yes	conditional on the lead primary SNP eQTL	0.0167064	-0.212523	0.450642	0.637212	0.917175
ENSG00000204642.9	HLA-F	HLA-A	A.23_01_01_01	Yes	primary	0.0167064	0.216817	0.460136	0.637496	0.91725
ENSG00000204428.8	LY6G5C	HLA-A	A.23_01_01_01	Yes	primary	0.0167064	-0.218316	0.465527	0.639095	0.917862
ENSG00000204623.4	ZNRD1-AS1	HLA-A	A.23_01_01_01	Yes	primary	0.0167064	-0.193333	0.425022	0.649198	0.921256
ENSG00000066379.10	ZNRD1	HLA-A	A.23_01_01_01	Yes	primary	0.0167064	0.190604	0.423686	0.652803	0.922488
ENSG00000231074.4	HCG18	HLA-A	A.23_01_01_01	Yes	conditional on the lead primary SNP eQTL	0.0167064	-0.130417	0.29454	0.657924	0.924473
ENSG00000204520.8	MICA	HLA-A	A.23_01_01_01	Yes	primary	0.0167064	-0.205773	0.466718	0.659291	0.924709
ENSG00000204540.6	PSORS1C1	HLA-A	A.23_01_01_01	Yes	primary	0.0167064	0.219152	0.50522	0.664452	0.92607
ENSG00000204388.5	HSPA1B	HLA-A	A.23_01_01_01	Yes	primary	0.0167064	-0.186064	0.431425	0.666267	0.926714
ENSG00000204267.9	TAP2	HLA-A	A.23_01_01_01	Yes	primary	0.0167064	0.196167	0.456546	0.667431	0.927
ENSG00000254870.1	ATP6V1G2-DDX39B	HLA-A	A.23_01_01_01	Yes	conditional on the lead primary and conditional 1 SNP eQTL	0.0167064	0.146117	0.353524	0.679376	0.929715
ENSG00000263020.1	CSNK2B-LY6G5B-1181	HLA-A	A.23_01_01_01	Yes	primary	0.0167064	0.181814	0.446564	0.683905	0.931427
ENSG00000250535.1	STK19P	HLA-A	A.23_01_01_01	Yes	primary	0.0167064	-0.18976	0.472251	0.687817	0.932551
ENSG00000198502.5	HLA-DRB5	HLA-A	A.23_01_01_01	Yes	primary	0.0167064	0.189474	0.50904	0.709731	0.93905
ENSG00000204574.8	ABCF1	HLA-A	A.23_01_01_01	Yes	primary	0.0167064	-0.119263	0.322653	0.711656	0.939658
ENSG00000255152.4	MSH5-SAPCD1	HLA-A	A.23_01_01_01	Yes	primary	0.0167064	-0.165751	0.451318	0.713425	0.940162
ENSG00000204590.8	GNL1	HLA-A	A.23_01_01_01	Yes	primary	0.0167064	-0.121842	0.335495	0.716477	0.941068
ENSG00000221988.8	PPT2	HLA-A	A.23_01_01_01	Yes	primary	0.0167064	0.145537	0.403061	0.71804	0.941657
ENSG00000270604.1	HCG17	HLA-A	A.23_01_01_01	Yes	primary	0.0167064	0.174682	0.489226	0.721049	0.942542
ENSG00000204344.10	STK19	HLA-A	A.23_01_01_01	Yes	primary	0.0167064	0.144495	0.408097	0.723287	0.943194
ENSG00000254870.1	ATP6V1G2-DDX39B	HLA-A	A.23_01_01_01	Yes	conditional on the lead primary, conditional 1 and conditional 2 SNP eQTL	0.0167064	0.127244	0.370913	0.731556	0.945417
ENSG00000204438.6	GPANK1	HLA-A	A.23_01_01_01	Yes	primary	0.0167064	0.146555	0.432731	0.734855	0.946632
ENSG00000204256.8	BRD2	HLA-A	A.23_01_01_01	Yes	conditional on the lead primary SNP eQTL	0.0167064	0.119239	0.357327	0.738608	0.947925
ENSG00000204390.8	HSPA1L	HLA-A	A.23_01_01_01	Yes	primary	0.0167064	0.153277	0.477779	0.748354	0.950357
ENSG00000230622.1	UQCRHP1	HLA-A	A.23_01_01_01	Yes	primary	0.0167064	0.156326	0.497437	0.753321	0.95165
ENSG00000204308.6	RNF5	HLA-A	A.23_01_01_01	Yes	primary	0.0167064	0.1417	0.459144	0.757612	0.952766
ENSG00000204574.8	ABCF1	HLA-A	A.23_01_01_01	Yes	conditional on the lead primary and conditional 1 SNP eQTL	0.0167064	-0.0946431	0.316749	0.765096	0.953767
ENSG00000213676.6	ATF6B	HLA-A	A.23_01_01_01	Yes	primary	0.0167064	-0.116396	0.399007	0.770506	0.954758
ENSG00000228415.2	PTMAP1	HLA-A	A.23_01_01_01	Yes	primary	0.0167064	0.133794	0.4595	0.77092	0.954758
ENSG00000240053.8	LY6G5B	HLA-A	A.23_01_01_01	Yes	conditional on the lead primary SNP eQTL	0.0167064	-0.0876993	0.314196	0.78015	0.956873
ENSG00000228962.1	HCG23	HLA-A	A.23_01_01_01	Yes	conditional on the lead primary SNP eQTL	0.0167064	-0.116875	0.437971	0.789581	0.959176
ENSG00000168477.13	TNXB	HLA-A	A.23_01_01_01	Yes	conditional on the lead primary SNP eQTL	0.0167064	-0.162255	0.621921	0.794175	0.960443
ENSG00000168477.13	TNXB	HLA-A	A.23_01_01_01	Yes	conditional on the lead primary, conditional 1 and conditional 2 SNP eQTL	0.0167064	-0.161974	0.624197	0.795255	0.960609
ENSG00000204287.9	HLA-DRA	HLA-A	A.23_01_01_01	Yes	primary	0.0167064	0.129774	0.522536	0.80386	0.962334
ENSG00000204592.5	HLA-E	HLA-A	A.23_01_01_01	Yes	conditional on the lead primary SNP eQTL	0.0167064	-0.0949566	0.40114	0.812876	0.964155
ENSG00000258388.3	PPT2-EGFL8	HLA-A	A.23_01_01_01	Yes	primary	0.0167064	0.11673	0.500306	0.815515	0.964718
ENSG00000242574.4	HLA-DMB	HLA-A	A.23_01_01_01	Yes	primary	0.0167064	-0.107181	0.479165	0.823004	0.966229
ENSG00000241370.1	RPP21	HLA-A	A.23_01_01_01	Yes	primary	0.0167064	0.0870831	0.401205	0.828166	0.967707
ENSG00000213760.6	ATP6V1G2	HLA-A	A.23_01_01_01	Yes	primary	0.0167064	0.105284	0.487243	0.828925	0.96796
ENSG00000204427.7	ABHD16A	HLA-A	A.23_01_01_01	Yes	primary	0.0167064	0.0827734	0.396697	0.834717	0.969487
ENSG00000204472.8	AIF1	HLA-A	A.23_01_01_01	Yes	primary	0.0167064	0.08384	0.405771	0.836307	0.969907
ENSG00000204592.5	HLA-E	HLA-A	A.23_01_01_01	Yes	conditional on the lead primary and conditional 1 SNP eQTL	0.0167064	-0.0808148	0.400809	0.840207	0.97049
ENSG00000213719.4	CLIC1	HLA-A	A.23_01_01_01	Yes	conditional on the lead primary SNP eQTL	0.0167064	0.063922	0.317733	0.840557	0.97049
ENSG00000204560.5	DHX16	HLA-A	A.23_01_01_01	Yes	primary	0.0167064	-0.0741672	0.373096	0.842428	0.971055
ENSG00000204463.8	BAG6	HLA-A	A.23_01_01_01	Yes	conditional on the lead primary and conditional 1 SNP eQTL	0.0167064	-0.0915594	0.483533	0.849814	0.972614
ENSG00000204463.8	BAG6	HLA-A	A.23_01_01_01	Yes	primary	0.0167064	0.0728742	0.404673	0.857089	0.973263
ENSG00000204472.8	AIF1	HLA-A	A.23_01_01_01	Yes	conditional on the lead primary SNP eQTL	0.0167064	-0.0681267	0.410624	0.868228	0.975813
ENSG00000254870.1	ATP6V1G2-DDX39B	HLA-A	A.23_01_01_01	Yes	primary	0.0167064	0.056959	0.364355	0.875774	0.977275
ENSG00000204308.6	RNF5	HLA-A	A.23_01_01_01	Yes	conditional on the lead primary SNP eQTL	0.0167064	-0.0651402	0.420157	0.876792	0.97755
ENSG00000198563.9	DDX39B	HLA-A	A.23_01_01_01	Yes	conditional on the lead primary and conditional 1 SNP eQTL	0.0167064	6.35052e-18	4.1665e-17	0.878857	0.978099
ENSG00000234745.5	HLA-B	HLA-A	A.23_01_01_01	Yes	conditional on the lead primary and conditional 1 SNP eQTL	0.0167064	-0.0640884	0.459561	0.88909	0.980143
ENSG00000224557.3	HLA-DPB2	HLA-A	A.23_01_01_01	Yes	primary	0.0167064	0.0681055	0.48866	0.889156	0.980143
ENSG00000214894.2	LINC00243	HLA-A	A.23_01_01_01	Yes	primary	0.0167064	-0.0660637	0.496882	0.894228	0.981005
ENSG00000230313.1	HCG24	HLA-A	A.23_01_01_01	Yes	primary	0.0167064	0.061882	0.489241	0.899347	0.981897
ENSG00000204576.7	PRR3	HLA-A	A.23_01_01_01	Yes	conditional on the lead primary SNP eQTL	0.0167064	-0.0561703	0.45554	0.901866	0.982139
ENSG00000137331.11	IER3	HLA-A	A.23_01_01_01	Yes	primary	0.0167064	-0.0401949	0.327743	0.902391	0.982139
ENSG00000204396.6	VWA7	HLA-A	A.23_01_01_01	Yes	primary	0.0167064	0.0551789	0.497385	0.911666	0.983389
ENSG00000213676.6	ATF6B	HLA-A	A.23_01_01_01	Yes	conditional on the lead primary and conditional 1 SNP eQTL	0.0167064	0.0603251	0.55628	0.913644	0.983547
ENSG00000231074.4	HCG18	HLA-A	A.23_01_01_01	Yes	conditional on the lead primary, conditional 1 and conditional 2 SNP eQTL	0.0167064	-0.0282762	0.29661	0.924052	0.985257
ENSG00000241106.2	HLA-DOB	HLA-A	A.23_01_01_01	Yes	conditional on the lead primary and conditional 1 SNP eQTL	0.0167064	0.0954775	1.04332	0.927085	0.985775
ENSG00000204308.6	RNF5	HLA-A	A.23_01_01_01	Yes	conditional on the lead primary and conditional 1 SNP eQTL	0.0167064	-0.0416336	0.45846	0.927642	0.985895
ENSG00000204472.8	AIF1	HLA-A	A.23_01_01_01	Yes	conditional on the lead primary, conditional 1 and conditional 2 SNP eQTL	0.0167064	-0.0366608	0.412205	0.929131	0.986045
ENSG00000213722.4	DDAH2	HLA-A	A.23_01_01_01	Yes	primary	0.0167064	0.0278839	0.320747	0.930724	0.986404
ENSG00000240053.8	LY6G5B	HLA-A	A.23_01_01_01	Yes	primary	0.0167064	-0.0284315	0.327166	0.930749	0.986413
ENSG00000241106.2	HLA-DOB	HLA-A	A.23_01_01_01	Yes	primary	0.0167064	0.0389893	0.473268	0.934342	0.986927
ENSG00000234745.5	HLA-B	HLA-A	A.23_01_01_01	Yes	conditional on the lead primary, conditional 1 and conditional 2 SNP eQTL	0.0167064	0.0328069	0.452832	0.942245	0.988879
ENSG00000198563.9	DDX39B	HLA-A	A.23_01_01_01	Yes	primary	0.0167064	-0.00808405	0.119782	0.946192	0.9895
ENSG00000204574.8	ABCF1	HLA-A	A.23_01_01_01	Yes	conditional on the lead primary SNP eQTL	0.0167064	-0.0260727	0.42796	0.95142	0.990535
ENSG00000213719.4	CLIC1	HLA-A	A.23_01_01_01	Yes	conditional on the lead primary and conditional 1 SNP eQTL	0.0167064	0.0169523	0.324293	0.95831	0.992362
ENSG00000227507.2	LTB	HLA-A	A.23_01_01_01	Yes	primary	0.0167064	-0.0184451	0.354856	0.958545	0.992365
ENSG00000204438.6	GPANK1	HLA-A	A.23_01_01_01	Yes	conditional on the lead primary SNP eQTL	0.0167064	-0.0206536	0.406838	0.959512	0.99238
ENSG00000240065.3	PSMB9	HLA-A	A.23_01_01_01	Yes	primary	0.0167064	-0.0182588	0.409077	0.964399	0.993434
ENSG00000224557.3	HLA-DPB2	HLA-A	A.23_01_01_01	Yes	conditional on the lead primary and conditional 1 SNP eQTL	0.0167064	0.0183883	0.417331	0.964855	0.993536
ENSG00000224557.3	HLA-DPB2	HLA-A	A.23_01_01_01	Yes	conditional on the lead primary SNP eQTL	0.0167064	0.01825	0.416614	0.965059	0.993536
ENSG00000223837.2	BRD2-IT1	HLA-A	A.23_01_01_01	Yes	primary	0.0167064	-0.0215138	0.498186	0.965555	0.993564
ENSG00000204396.6	VWA7	HLA-A	A.23_01_01_01	Yes	conditional on the lead primary SNP eQTL	0.0167064	0.0158583	0.486169	0.973978	0.99508
ENSG00000204438.6	GPANK1	HLA-A	A.23_01_01_01	Yes	conditional on the lead primary, conditional 1 and conditional 2 SNP eQTL	0.0167064	0.0118025	0.421853	0.97768	0.996122
ENSG00000213654.5	GPSM3	HLA-A	A.23_01_01_01	Yes	primary	0.0167064	0.00677765	0.379131	0.985737	0.997726
ENSG00000228415.2	PTMAP1	HLA-A	A.23_01_01_01	Yes	conditional on the lead primary SNP eQTL	0.0167064	0.00463484	0.438799	0.991572	0.998901
ENSG00000242574.4	HLA-DMB	HLA-A	A.23_01_01_01	Yes	conditional on the lead primary, conditional 1 and conditional 2 SNP eQTL	0.0167064	0.00391925	0.488528	0.993599	0.999051
ENSG00000206341.6	HLA-H	HLA-A	A.24_02_01_01	Yes	conditional on the lead primary and conditional 1 SNP eQTL	0.107399	2.45887	0.23016	1.11022e-16	9.60126e-14
ENSG00000206341.6	HLA-H	HLA-A	A.24_02_01_01	Yes	conditional on the lead primary, conditional 1 and conditional 2 SNP eQTL	0.107399	2.98243	0.175068	1.11022e-16	9.60126e-14
ENSG00000206341.6	HLA-H	HLA-A	A.24_02_01_01	Yes	conditional on the lead primary SNP eQTL	0.107399	2.42982	0.229853	1.11022e-16	9.60126e-14
ENSG00000206341.6	HLA-H	HLA-A	A.24_02_01_01	Yes	primary	0.107399	3.00988	0.172221	1.11022e-16	9.60126e-14
ENSG00000230795.2	HLA-K	HLA-A	A.24_02_01_01	Yes	primary	0.107399	-2.15236	0.18755	1.11022e-16	9.60126e-14
ENSG00000227766.1	HCG4P5	HLA-A	A.24_02_01_01	Yes	conditional on the lead primary and conditional 1 SNP eQTL	0.107399	1.46772	0.207589	1.54599e-12	7.22465e-10
ENSG00000230795.2	HLA-K	HLA-A	A.24_02_01_01	Yes	conditional on the lead primary SNP eQTL	0.107399	-1.75611	0.251326	2.80076e-12	1.25431e-09
ENSG00000227766.1	HCG4P5	HLA-A	A.24_02_01_01	Yes	conditional on the lead primary SNP eQTL	0.107399	1.27344	0.202411	3.1472e-10	1.00761e-07
ENSG00000227766.1	HCG4P5	HLA-A	A.24_02_01_01	Yes	primary	0.107399	1.0833	0.21227	3.3361e-07	5.4865e-05
ENSG00000204463.8	BAG6	HLA-A	A.24_02_01_01	Yes	primary	0.107399	-0.726306	0.173393	2.80443e-05	0.00257946
ENSG00000241106.2	HLA-DOB	HLA-A	A.24_02_01_01	Yes	conditional on the lead primary and conditional 1 SNP eQTL	0.107399	-0.965667	0.256422	0.000165929	0.0107808
ENSG00000239257.1	RPL23AP1	HLA-A	A.24_02_01_01	Yes	primary	0.107399	0.753326	0.212918	0.000403005	0.0211421
ENSG00000234127.4	TRIM26	HLA-A	A.24_02_01_01	Yes	primary	0.107399	0.509756	0.14896	0.000621379	0.0288945
ENSG00000204516.5	MICB	HLA-A	A.24_02_01_01	Yes	primary	0.107399	-0.569575	0.167954	0.000695754	0.0311962
ENSG00000204315.3	FKBPL	HLA-A	A.24_02_01_01	Yes	primary	0.107399	-0.528907	0.163012	0.00117619	0.0456863
ENSG00000241106.2	HLA-DOB	HLA-A	A.24_02_01_01	Yes	primary	0.107399	-0.656978	0.204452	0.00131192	0.0493315
ENSG00000230795.2	HLA-K	HLA-A	A.24_02_01_01	Yes	conditional on the lead primary and conditional 1 SNP eQTL	0.107399	-1.05955	0.3379	0.00171451	0.0587415
ENSG00000204257.10	HLA-DMA	HLA-A	A.24_02_01_01	Yes	primary	0.107399	-0.621015	0.204717	0.00241707	0.0740154
ENSG00000237669.1	HCG4P3	HLA-A	A.24_02_01_01	Yes	primary	0.107399	0.648756	0.225239	0.00397305	0.101744
ENSG00000213719.4	CLIC1	HLA-A	A.24_02_01_01	Yes	primary	0.107399	-0.410734	0.142884	0.00404545	0.102551
ENSG00000204356.7	NELFE	HLA-A	A.24_02_01_01	Yes	primary	0.107399	-0.51433	0.182591	0.00484989	0.114387
ENSG00000168477.13	TNXB	HLA-A	A.24_02_01_01	Yes	primary	0.107399	-0.484634	0.17705	0.00619522	0.133205
ENSG00000240053.8	LY6G5B	HLA-A	A.24_02_01_01	Yes	conditional on the lead primary SNP eQTL	0.107399	-0.365566	0.135748	0.00708186	0.144013
ENSG00000176998.3	HCG4	HLA-A	A.24_02_01_01	Yes	primary	0.107399	0.535928	0.206988	0.00962067	0.171567
ENSG00000231389.3	HLA-DPA1	HLA-A	A.24_02_01_01	Yes	primary	0.107399	-0.496219	0.19884	0.0125755	0.199628
ENSG00000213676.6	ATF6B	HLA-A	A.24_02_01_01	Yes	conditional on the lead primary and conditional 1 SNP eQTL	0.107399	-0.610226	0.248803	0.0141808	0.213663
ENSG00000241106.2	HLA-DOB	HLA-A	A.24_02_01_01	Yes	conditional on the lead primary SNP eQTL	0.107399	-0.459916	0.188899	0.0149035	0.219563
ENSG00000166278.10	C2	HLA-A	A.24_02_01_01	Yes	primary	0.107399	-0.467275	0.197006	0.0176979	0.240571
ENSG00000204392.6	LSM2	HLA-A	A.24_02_01_01	Yes	primary	0.107399	-0.415969	0.176912	0.0187094	0.246439
ENSG00000240053.8	LY6G5B	HLA-A	A.24_02_01_01	Yes	primary	0.107399	-0.330044	0.141503	0.0196787	0.252402
ENSG00000204525.10	HLA-C	HLA-A	A.24_02_01_01	Yes	conditional on the lead primary SNP eQTL	0.107399	-0.418238	0.18075	0.0206732	0.259043
ENSG00000204463.8	BAG6	HLA-A	A.24_02_01_01	Yes	conditional on the lead primary and conditional 1 SNP eQTL	0.107399	-0.42764	0.191648	0.025656	0.287305
ENSG00000204525.10	HLA-C	HLA-A	A.24_02_01_01	Yes	conditional on the lead primary and conditional 1 SNP eQTL	0.107399	-0.398061	0.180754	0.0276492	0.296785
ENSG00000204256.8	BRD2	HLA-A	A.24_02_01_01	Yes	primary	0.107399	-0.348939	0.162425	0.0316893	0.316632
ENSG00000204256.8	BRD2	HLA-A	A.24_02_01_01	Yes	conditional on the lead primary SNP eQTL	0.107399	-0.330272	0.154825	0.0329087	0.322565
ENSG00000213676.6	ATF6B	HLA-A	A.24_02_01_01	Yes	conditional on the lead primary SNP eQTL	0.107399	-0.455185	0.221115	0.0395335	0.348969
ENSG00000204536.9	CCHCR1	HLA-A	A.24_02_01_01	Yes	primary	0.107399	0.42126	0.208427	0.0432651	0.362783
ENSG00000244355.3	LY6G6D	HLA-A	A.24_02_01_01	Yes	primary	0.107399	-0.41606	0.205868	0.0432796	0.362805
ENSG00000223865.6	HLA-DPB1	HLA-A	A.24_02_01_01	Yes	primary	0.107399	-0.35223	0.175323	0.044534	0.367001
ENSG00000204435.9	CSNK2B	HLA-A	A.24_02_01_01	Yes	primary	0.107399	-0.338354	0.169506	0.0459216	0.370913
ENSG00000224557.3	HLA-DPB2	HLA-A	A.24_02_01_01	Yes	conditional on the lead primary and conditional 1 SNP eQTL	0.107399	-0.358297	0.182569	0.0497009	0.385446
ENSG00000224557.3	HLA-DPB2	HLA-A	A.24_02_01_01	Yes	conditional on the lead primary SNP eQTL	0.107399	-0.356578	0.181718	0.049732	0.385446
ENSG00000223865.6	HLA-DPB1	HLA-A	A.24_02_01_01	Yes	conditional on the lead primary and conditional 1 SNP eQTL	0.107399	-0.324373	0.165836	0.0504664	0.388797
ENSG00000204592.5	HLA-E	HLA-A	A.24_02_01_01	Yes	primary	0.107399	-0.349786	0.179629	0.0515021	0.3926
ENSG00000204592.5	HLA-E	HLA-A	A.24_02_01_01	Yes	conditional on the lead primary SNP eQTL	0.107399	-0.332953	0.171349	0.0520006	0.394495
ENSG00000224389.4	C4B	HLA-A	A.24_02_01_01	Yes	primary	0.107399	-0.390479	0.2022	0.0534638	0.39873
ENSG00000179344.12	HLA-DQB1	HLA-A	A.24_02_01_01	Yes	primary	0.107399	0.395147	0.209878	0.0597352	0.415374
ENSG00000204315.3	FKBPL	HLA-A	A.24_02_01_01	Yes	conditional on the lead primary SNP eQTL	0.107399	0.468277	0.249869	0.060918	0.419106
ENSG00000213719.4	CLIC1	HLA-A	A.24_02_01_01	Yes	conditional on the lead primary and conditional 1 SNP eQTL	0.107399	-0.267231	0.143036	0.0617245	0.421091
ENSG00000204315.3	FKBPL	HLA-A	A.24_02_01_01	Yes	conditional on the lead primary and conditional 1 SNP eQTL	0.107399	0.460221	0.246538	0.0619389	0.421696
ENSG00000204305.9	AGER	HLA-A	A.24_02_01_01	Yes	primary	0.107399	-0.304263	0.165927	0.0666953	0.434554
ENSG00000204394.8	VARS	HLA-A	A.24_02_01_01	Yes	primary	0.107399	-0.300701	0.164617	0.0677505	0.437138
ENSG00000243753.1	HLA-L	HLA-A	A.24_02_01_01	Yes	primary	0.107399	-0.365346	0.200256	0.068093	0.437794
ENSG00000204592.5	HLA-E	HLA-A	A.24_02_01_01	Yes	conditional on the lead primary and conditional 1 SNP eQTL	0.107399	-0.311657	0.171618	0.0693708	0.441192
ENSG00000204388.5	HSPA1B	HLA-A	A.24_02_01_01	Yes	primary	0.107399	-0.331329	0.187006	0.0764358	0.460918
ENSG00000230313.1	HCG24	HLA-A	A.24_02_01_01	Yes	conditional on the lead primary and conditional 1 SNP eQTL	0.107399	0.524834	0.299445	0.0796555	0.46872
ENSG00000204264.4	PSMB8	HLA-A	A.24_02_01_01	Yes	primary	0.107399	0.284465	0.163034	0.0810165	0.471576
ENSG00000237669.1	HCG4P3	HLA-A	A.24_02_01_01	Yes	conditional on the lead primary, conditional 1 and conditional 2 SNP eQTL	0.107399	0.361164	0.20703	0.0810721	0.471682
ENSG00000219797.2	PPIAP9	HLA-A	A.24_02_01_01	Yes	primary	0.107399	-0.374821	0.218772	0.0866582	0.485628
ENSG00000237669.1	HCG4P3	HLA-A	A.24_02_01_01	Yes	conditional on the lead primary SNP eQTL	0.107399	0.354786	0.207224	0.0868798	0.485853
ENSG00000223837.2	BRD2-IT1	HLA-A	A.24_02_01_01	Yes	primary	0.107399	-0.369798	0.216547	0.0876925	0.487895
ENSG00000234127.4	TRIM26	HLA-A	A.24_02_01_01	Yes	conditional on the lead primary SNP eQTL	0.107399	0.246704	0.145725	0.0904664	0.494189
ENSG00000224389.4	C4B	HLA-A	A.24_02_01_01	Yes	conditional on the lead primary SNP eQTL	0.107399	-0.327505	0.194383	0.0920195	0.496743
ENSG00000204469.8	PRRC2A	HLA-A	A.24_02_01_01	Yes	primary	0.107399	-0.274459	0.165076	0.0963883	0.505335
ENSG00000206337.6	HCP5	HLA-A	A.24_02_01_01	Yes	primary	0.107399	-0.319708	0.194015	0.0993828	0.5104
ENSG00000223865.6	HLA-DPB1	HLA-A	A.24_02_01_01	Yes	conditional on the lead primary, conditional 1 and conditional 2 SNP eQTL	0.107399	-0.27091	0.172083	0.115419	0.539961
ENSG00000204428.8	LY6G5C	HLA-A	A.24_02_01_01	Yes	conditional on the lead primary SNP eQTL	0.107399	-0.305143	0.194259	0.116228	0.541271
ENSG00000241404.2	EGFL8	HLA-A	A.24_02_01_01	Yes	conditional on the lead primary and conditional 1 SNP eQTL	0.107399	-0.291651	0.186198	0.117267	0.54293
ENSG00000241404.2	EGFL8	HLA-A	A.24_02_01_01	Yes	conditional on the lead primary SNP eQTL	0.107399	-0.291189	0.185982	0.117422	0.5432
ENSG00000204444.6	APOM	HLA-A	A.24_02_01_01	Yes	conditional on the lead primary SNP eQTL	0.107399	-0.356217	0.228081	0.118336	0.544213
ENSG00000228727.4	SAPCD1	HLA-A	A.24_02_01_01	Yes	primary	0.107399	-0.233754	0.151295	0.122341	0.550363
ENSG00000204540.6	PSORS1C1	HLA-A	A.24_02_01_01	Yes	primary	0.107399	0.339567	0.220038	0.122777	0.551222
ENSG00000204618.4	RNF39	HLA-A	A.24_02_01_01	Yes	primary	0.107399	-0.315113	0.207606	0.129054	0.561739
ENSG00000204315.3	FKBPL	HLA-A	A.24_02_01_01	Yes	conditional on the lead primary, conditional 1 and conditional 2 SNP eQTL	0.107399	0.364726	0.242789	0.133037	0.566129
ENSG00000137312.10	FLOT1	HLA-A	A.24_02_01_01	Yes	conditional on the lead primary SNP eQTL	0.107399	0.247335	0.165608	0.135308	0.569916
ENSG00000204257.10	HLA-DMA	HLA-A	A.24_02_01_01	Yes	conditional on the lead primary and conditional 1 SNP eQTL	0.107399	-0.37405	0.252411	0.138365	0.573822
ENSG00000204574.8	ABCF1	HLA-A	A.24_02_01_01	Yes	conditional on the lead primary SNP eQTL	0.107399	-0.279161	0.188873	0.139398	0.57513
ENSG00000204388.5	HSPA1B	HLA-A	A.24_02_01_01	Yes	conditional on the lead primary and conditional 1 SNP eQTL	0.107399	-0.369764	0.251078	0.14083	0.578087
ENSG00000213676.6	ATF6B	HLA-A	A.24_02_01_01	Yes	primary	0.107399	-0.255295	0.17337	0.140873	0.578171
ENSG00000176998.3	HCG4	HLA-A	A.24_02_01_01	Yes	conditional on the lead primary SNP eQTL	0.107399	0.284996	0.193773	0.141352	0.579092
ENSG00000270604.1	HCG17	HLA-A	A.24_02_01_01	Yes	primary	0.107399	0.311926	0.212446	0.142033	0.580114
ENSG00000204463.8	BAG6	HLA-A	A.24_02_01_01	Yes	conditional on the lead primary SNP eQTL	0.107399	-0.267828	0.182536	0.142306	0.580723
ENSG00000204444.6	APOM	HLA-A	A.24_02_01_01	Yes	conditional on the lead primary, conditional 1 and conditional 2 SNP eQTL	0.107399	-0.336935	0.23031	0.143478	0.582416
ENSG00000237669.1	HCG4P3	HLA-A	A.24_02_01_01	Yes	conditional on the lead primary and conditional 1 SNP eQTL	0.107399	0.327174	0.22842	0.152048	0.594581
ENSG00000227507.2	LTB	HLA-A	A.24_02_01_01	Yes	conditional on the lead primary and conditional 1 SNP eQTL	0.107399	0.346745	0.245487	0.157809	0.601422
ENSG00000066379.10	ZNRD1	HLA-A	A.24_02_01_01	Yes	conditional on the lead primary SNP eQTL	0.107399	-0.268765	0.190596	0.158501	0.602503
ENSG00000213760.6	ATP6V1G2	HLA-A	A.24_02_01_01	Yes	primary	0.107399	-0.294501	0.211753	0.164294	0.609966
ENSG00000213722.4	DDAH2	HLA-A	A.24_02_01_01	Yes	primary	0.107399	0.190674	0.139426	0.171449	0.619099
ENSG00000227507.2	LTB	HLA-A	A.24_02_01_01	Yes	conditional on the lead primary, conditional 1 and conditional 2 SNP eQTL	0.107399	0.305488	0.223679	0.172019	0.619696
ENSG00000206344.6	HCG27	HLA-A	A.24_02_01_01	Yes	primary	0.107399	-0.291871	0.214341	0.173288	0.621828
ENSG00000204560.5	DHX16	HLA-A	A.24_02_01_01	Yes	primary	0.107399	-0.221248	0.16302	0.174722	0.624251
ENSG00000204644.5	ZFP57	HLA-A	A.24_02_01_01	Yes	conditional on the lead primary SNP eQTL	0.107399	0.259053	0.192004	0.17727	0.627647
ENSG00000204574.8	ABCF1	HLA-A	A.24_02_01_01	Yes	primary	0.107399	-0.187584	0.141361	0.184514	0.637187
ENSG00000204427.7	ABHD16A	HLA-A	A.24_02_01_01	Yes	primary	0.107399	0.225283	0.17273	0.192147	0.645419
ENSG00000272221.1	XXbac-BPG181B23.7	HLA-A	A.24_02_01_01	Yes	conditional on the lead primary SNP eQTL	0.107399	-0.265993	0.207462	0.199796	0.653748
ENSG00000237923.1	XXbac-BPG27H4.8	HLA-A	A.24_02_01_01	Yes	primary	0.107399	-0.204034	0.159492	0.200802	0.654788
ENSG00000223865.6	HLA-DPB1	HLA-A	A.24_02_01_01	Yes	conditional on the lead primary SNP eQTL	0.107399	-0.212535	0.166967	0.203049	0.657888
ENSG00000204538.3	PSORS1C2	HLA-A	A.24_02_01_01	Yes	conditional on the lead primary SNP eQTL	0.107399	-0.23264	0.185044	0.208676	0.663553
ENSG00000204428.8	LY6G5C	HLA-A	A.24_02_01_01	Yes	primary	0.107399	-0.253104	0.20299	0.212442	0.666668
ENSG00000204576.7	PRR3	HLA-A	A.24_02_01_01	Yes	conditional on the lead primary, conditional 1 and conditional 2 SNP eQTL	0.107399	-0.253724	0.204458	0.214621	0.668517
ENSG00000237042.1	MICG	HLA-A	A.24_02_01_01	Yes	primary	0.107399	-0.188746	0.152899	0.217037	0.671689
ENSG00000204385.6	SLC44A4	HLA-A	A.24_02_01_01	Yes	primary	0.107399	-0.213577	0.173507	0.218345	0.672407
ENSG00000235663.1	SAPCD1-AS1	HLA-A	A.24_02_01_01	Yes	primary	0.107399	-0.272452	0.223395	0.222618	0.676793
ENSG00000179344.12	HLA-DQB1	HLA-A	A.24_02_01_01	Yes	conditional on the lead primary SNP eQTL	0.107399	0.233223	0.192662	0.226076	0.679904
ENSG00000066379.10	ZNRD1	HLA-A	A.24_02_01_01	Yes	primary	0.107399	-0.222738	0.18446	0.227234	0.680433
ENSG00000219797.2	PPIAP9	HLA-A	A.24_02_01_01	Yes	conditional on the lead primary SNP eQTL	0.107399	-0.26043	0.215871	0.227657	0.680716
ENSG00000241370.1	RPP21	HLA-A	A.24_02_01_01	Yes	primary	0.107399	0.210495	0.174745	0.228364	0.681384
ENSG00000221988.8	PPT2	HLA-A	A.24_02_01_01	Yes	primary	0.107399	0.209529	0.174637	0.230217	0.68298
ENSG00000204257.10	HLA-DMA	HLA-A	A.24_02_01_01	Yes	conditional on the lead primary SNP eQTL	0.107399	-0.285152	0.238933	0.232698	0.685422
ENSG00000137310.7	TCF19	HLA-A	A.24_02_01_01	Yes	conditional on the lead primary and conditional 1 SNP eQTL	0.107399	-0.193483	0.163479	0.236596	0.688844
ENSG00000137312.10	FLOT1	HLA-A	A.24_02_01_01	Yes	primary	0.107399	0.203369	0.172709	0.238986	0.691139
ENSG00000204351.7	SKIV2L	HLA-A	A.24_02_01_01	Yes	primary	0.107399	0.229099	0.198899	0.249388	0.701333
ENSG00000254870.1	ATP6V1G2-DDX39B	HLA-A	A.24_02_01_01	Yes	conditional on the lead primary SNP eQTL	0.107399	-0.171771	0.153077	0.261811	0.712926
ENSG00000272221.1	XXbac-BPG181B23.7	HLA-A	A.24_02_01_01	Yes	conditional on the lead primary and conditional 1 SNP eQTL	0.107399	-0.228724	0.204067	0.26236	0.71341
ENSG00000204348.5	DXO	HLA-A	A.24_02_01_01	Yes	primary	0.107399	-0.205382	0.184451	0.265503	0.715881
ENSG00000137310.7	TCF19	HLA-A	A.24_02_01_01	Yes	conditional on the lead primary SNP eQTL	0.107399	-0.179893	0.163467	0.271122	0.72042
ENSG00000204574.8	ABCF1	HLA-A	A.24_02_01_01	Yes	conditional on the lead primary and conditional 1 SNP eQTL	0.107399	-0.149477	0.139034	0.282324	0.728846
ENSG00000224557.3	HLA-DPB2	HLA-A	A.24_02_01_01	Yes	primary	0.107399	-0.226038	0.212786	0.288109	0.733908
ENSG00000255152.4	MSH5-SAPCD1	HLA-A	A.24_02_01_01	Yes	primary	0.107399	-0.202665	0.19643	0.302194	0.745548
ENSG00000227507.2	LTB	HLA-A	A.24_02_01_01	Yes	primary	0.107399	0.15842	0.154377	0.3048	0.747232
ENSG00000204623.4	ZNRD1-AS1	HLA-A	A.24_02_01_01	Yes	primary	0.107399	0.189722	0.18614	0.308085	0.748481
ENSG00000204287.9	HLA-DRA	HLA-A	A.24_02_01_01	Yes	conditional on the lead primary SNP eQTL	0.107399	0.199058	0.198683	0.316396	0.754245
ENSG00000200816.1	SNORA38	HLA-A	A.24_02_01_01	Yes	primary	0.107399	-0.174156	0.175423	0.320819	0.757661
ENSG00000243753.1	HLA-L	HLA-A	A.24_02_01_01	Yes	conditional on the lead primary, conditional 1 and conditional 2 SNP eQTL	0.107399	0.229632	0.232027	0.322331	0.759142
ENSG00000204439.3	C6orf47	HLA-A	A.24_02_01_01	Yes	conditional on the lead primary SNP eQTL	0.107399	-0.159155	0.163851	0.33138	0.765732
ENSG00000137337.10	MDC1	HLA-A	A.24_02_01_01	Yes	primary	0.107399	-0.174065	0.181095	0.33646	0.769136
ENSG00000235781.1	XXbac-BPG249D20.9	HLA-A	A.24_02_01_01	Yes	primary	0.107399	-0.213668	0.222731	0.337403	0.770044
ENSG00000204308.6	RNF5	HLA-A	A.24_02_01_01	Yes	primary	0.107399	0.191105	0.199987	0.33928	0.771025
ENSG00000204525.10	HLA-C	HLA-A	A.24_02_01_01	Yes	primary	0.107399	-0.185146	0.195181	0.342833	0.773272
ENSG00000204642.9	HLA-F	HLA-A	A.24_02_01_01	Yes	conditional on the lead primary SNP eQTL	0.107399	0.170345	0.189848	0.369573	0.790502
ENSG00000250535.1	STK19P	HLA-A	A.24_02_01_01	Yes	primary	0.107399	-0.184046	0.206038	0.371718	0.791873
ENSG00000204252.8	HLA-DOA	HLA-A	A.24_02_01_01	Yes	primary	0.107399	0.175357	0.19735	0.37424	0.792967
ENSG00000204475.5	NCR3	HLA-A	A.24_02_01_01	Yes	primary	0.107399	-0.178218	0.201237	0.375827	0.794283
[truncated: 73,240 more rows]
