# Supplementary figures and images for: Systematic genetic analysis of the MHC region reveals mechanistic underpinnings of HLA type associations with disease
Source: eLife journal article supplement (doi:10.7554/elife.48476), 2019-11-20

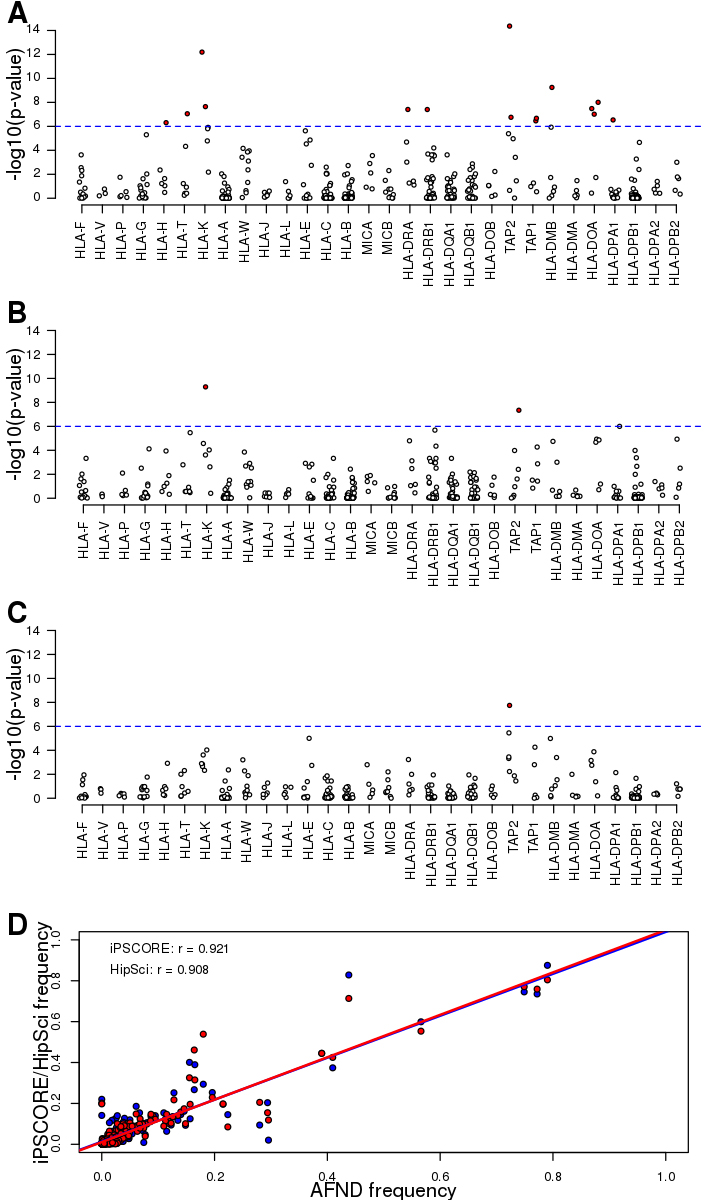

Supplement: supp [file elife-48476-supp-v1.zip › elife_poa_e48476_Figure_2_figure_supplement_1.jpg]

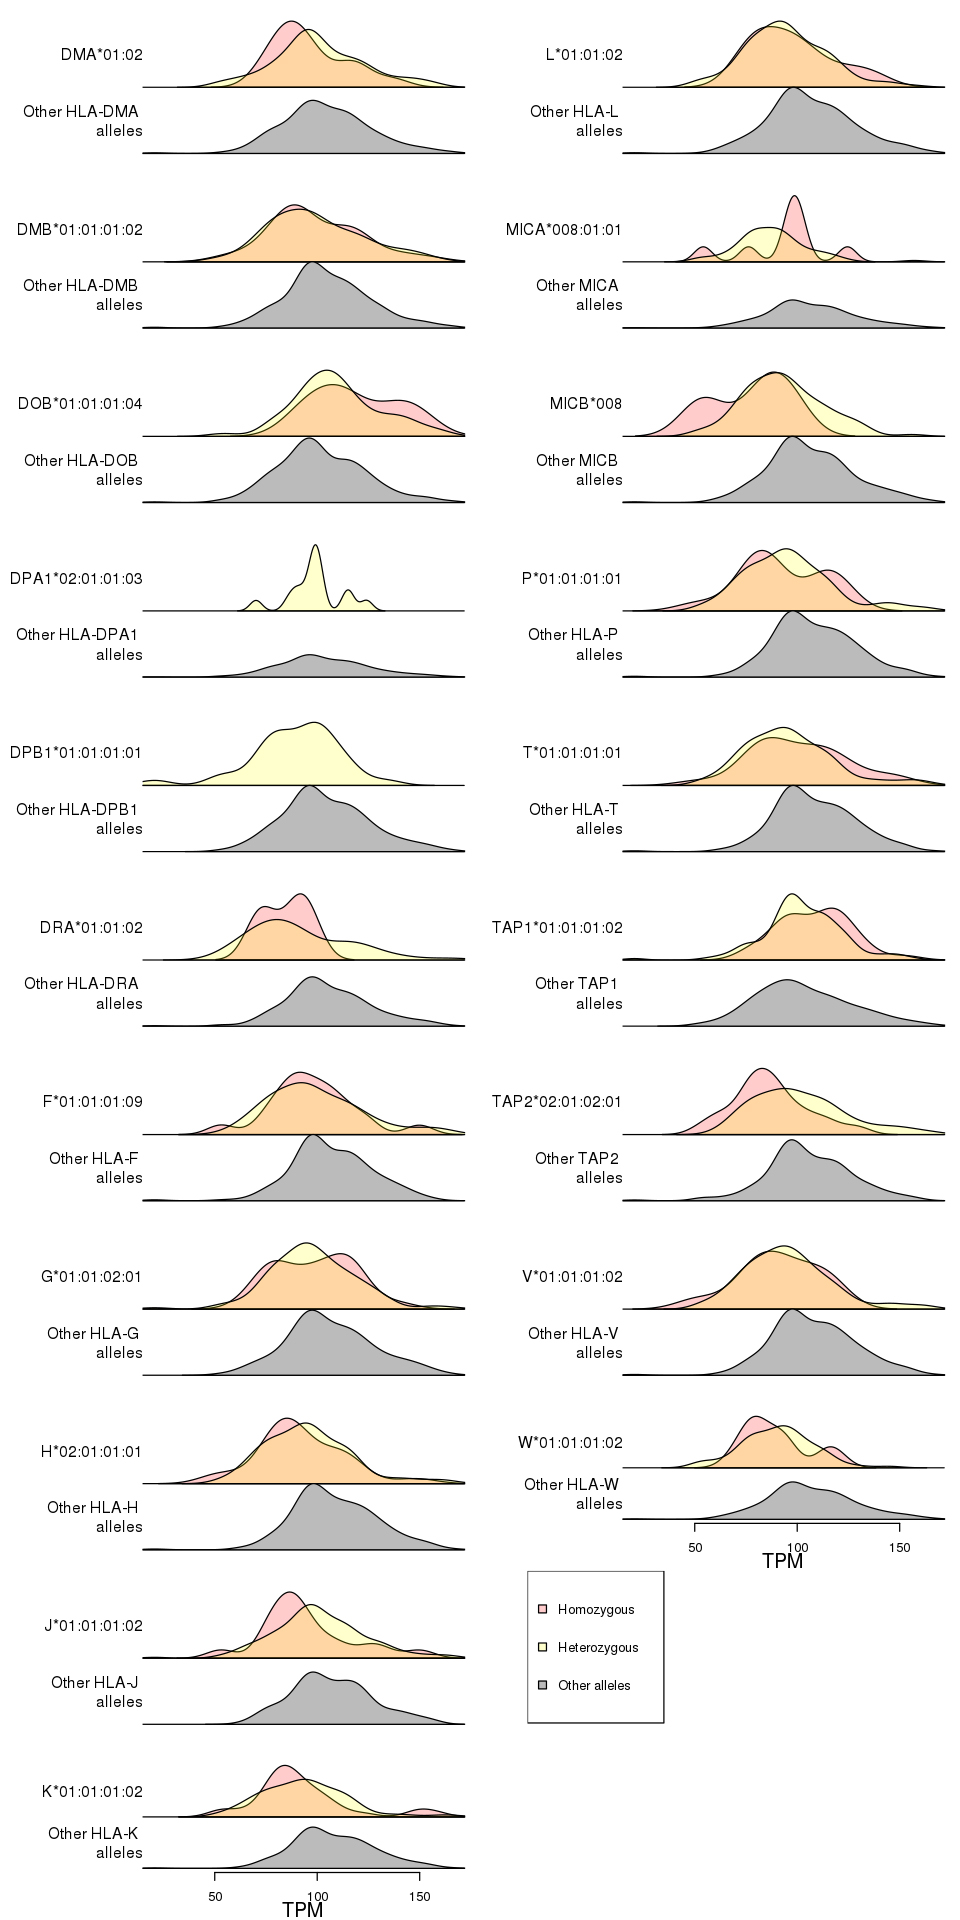

Supplement: supp [file elife-48476-supp-v1.zip › elife_poa_e48476_Figure_8_figure_supplement_1.jpg]

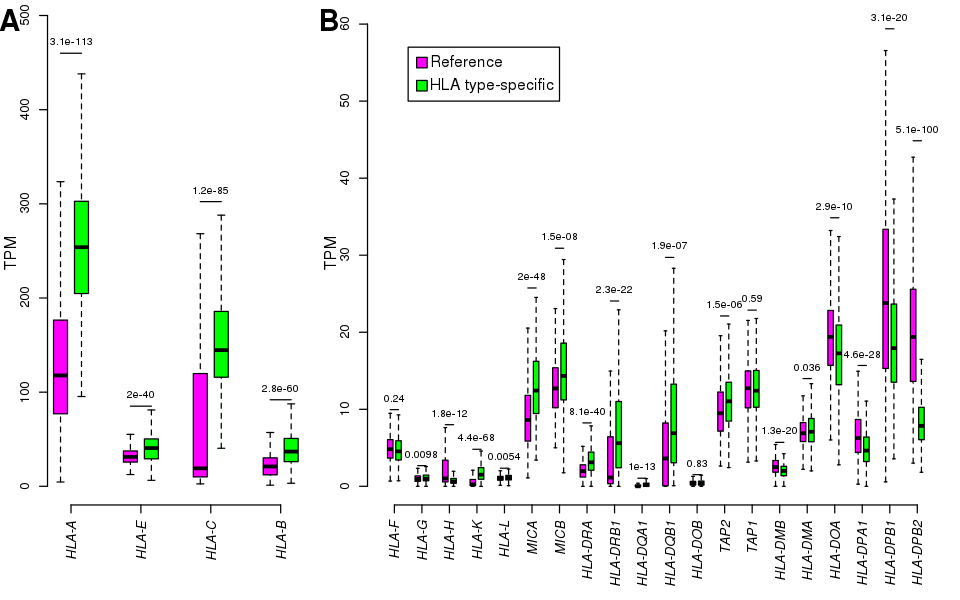

Supplement: supp [file elife-48476-supp-v1.zip › elife_poa_e48476_Figure_3_figure_supplement_1.jpg]

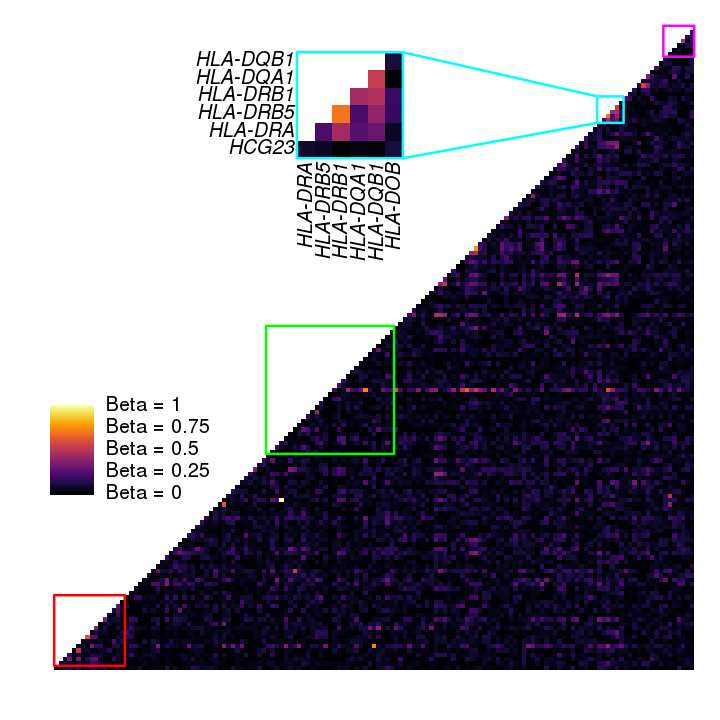

Supplement: supp [file elife-48476-supp-v1.zip › elife_poa_e48476_Figure_7_figure_supplement_1.jpg]

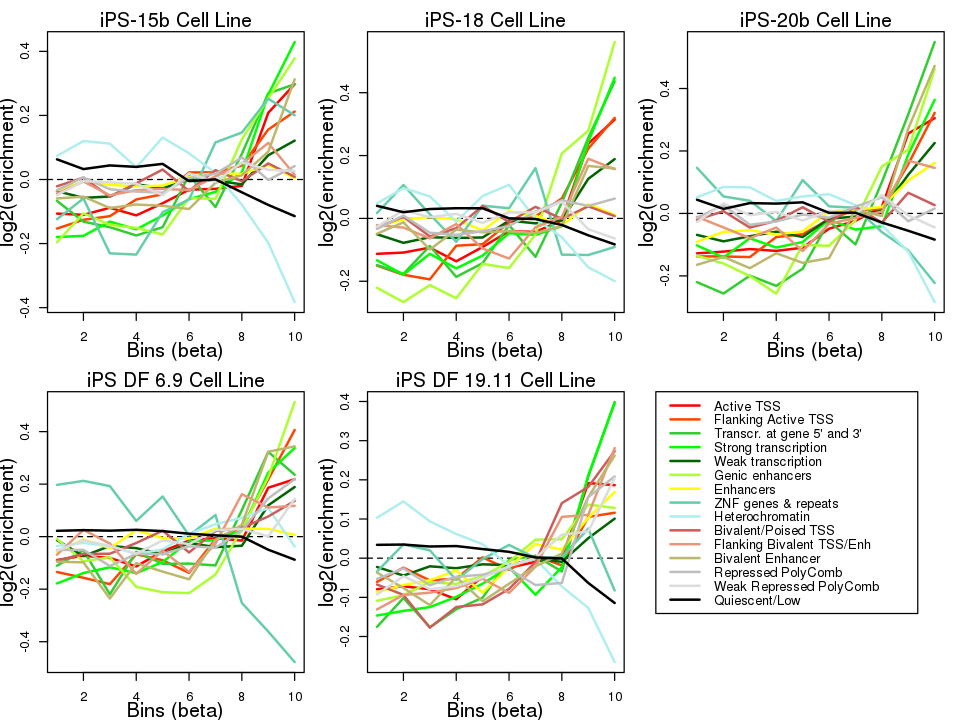

Supplement: supp [file elife-48476-supp-v1.zip › elife_poa_e48476_Figure_4_figure_supplement_3.jpg]

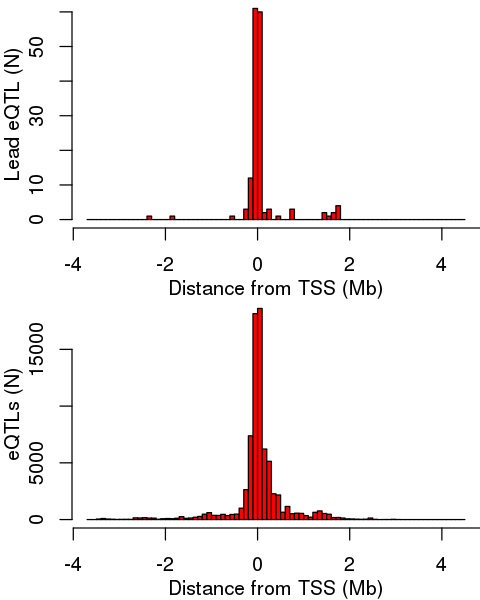

Supplement: supp [file elife-48476-supp-v1.zip › elife_poa_e48476_Figure_4_figure_supplement_1.jpg]

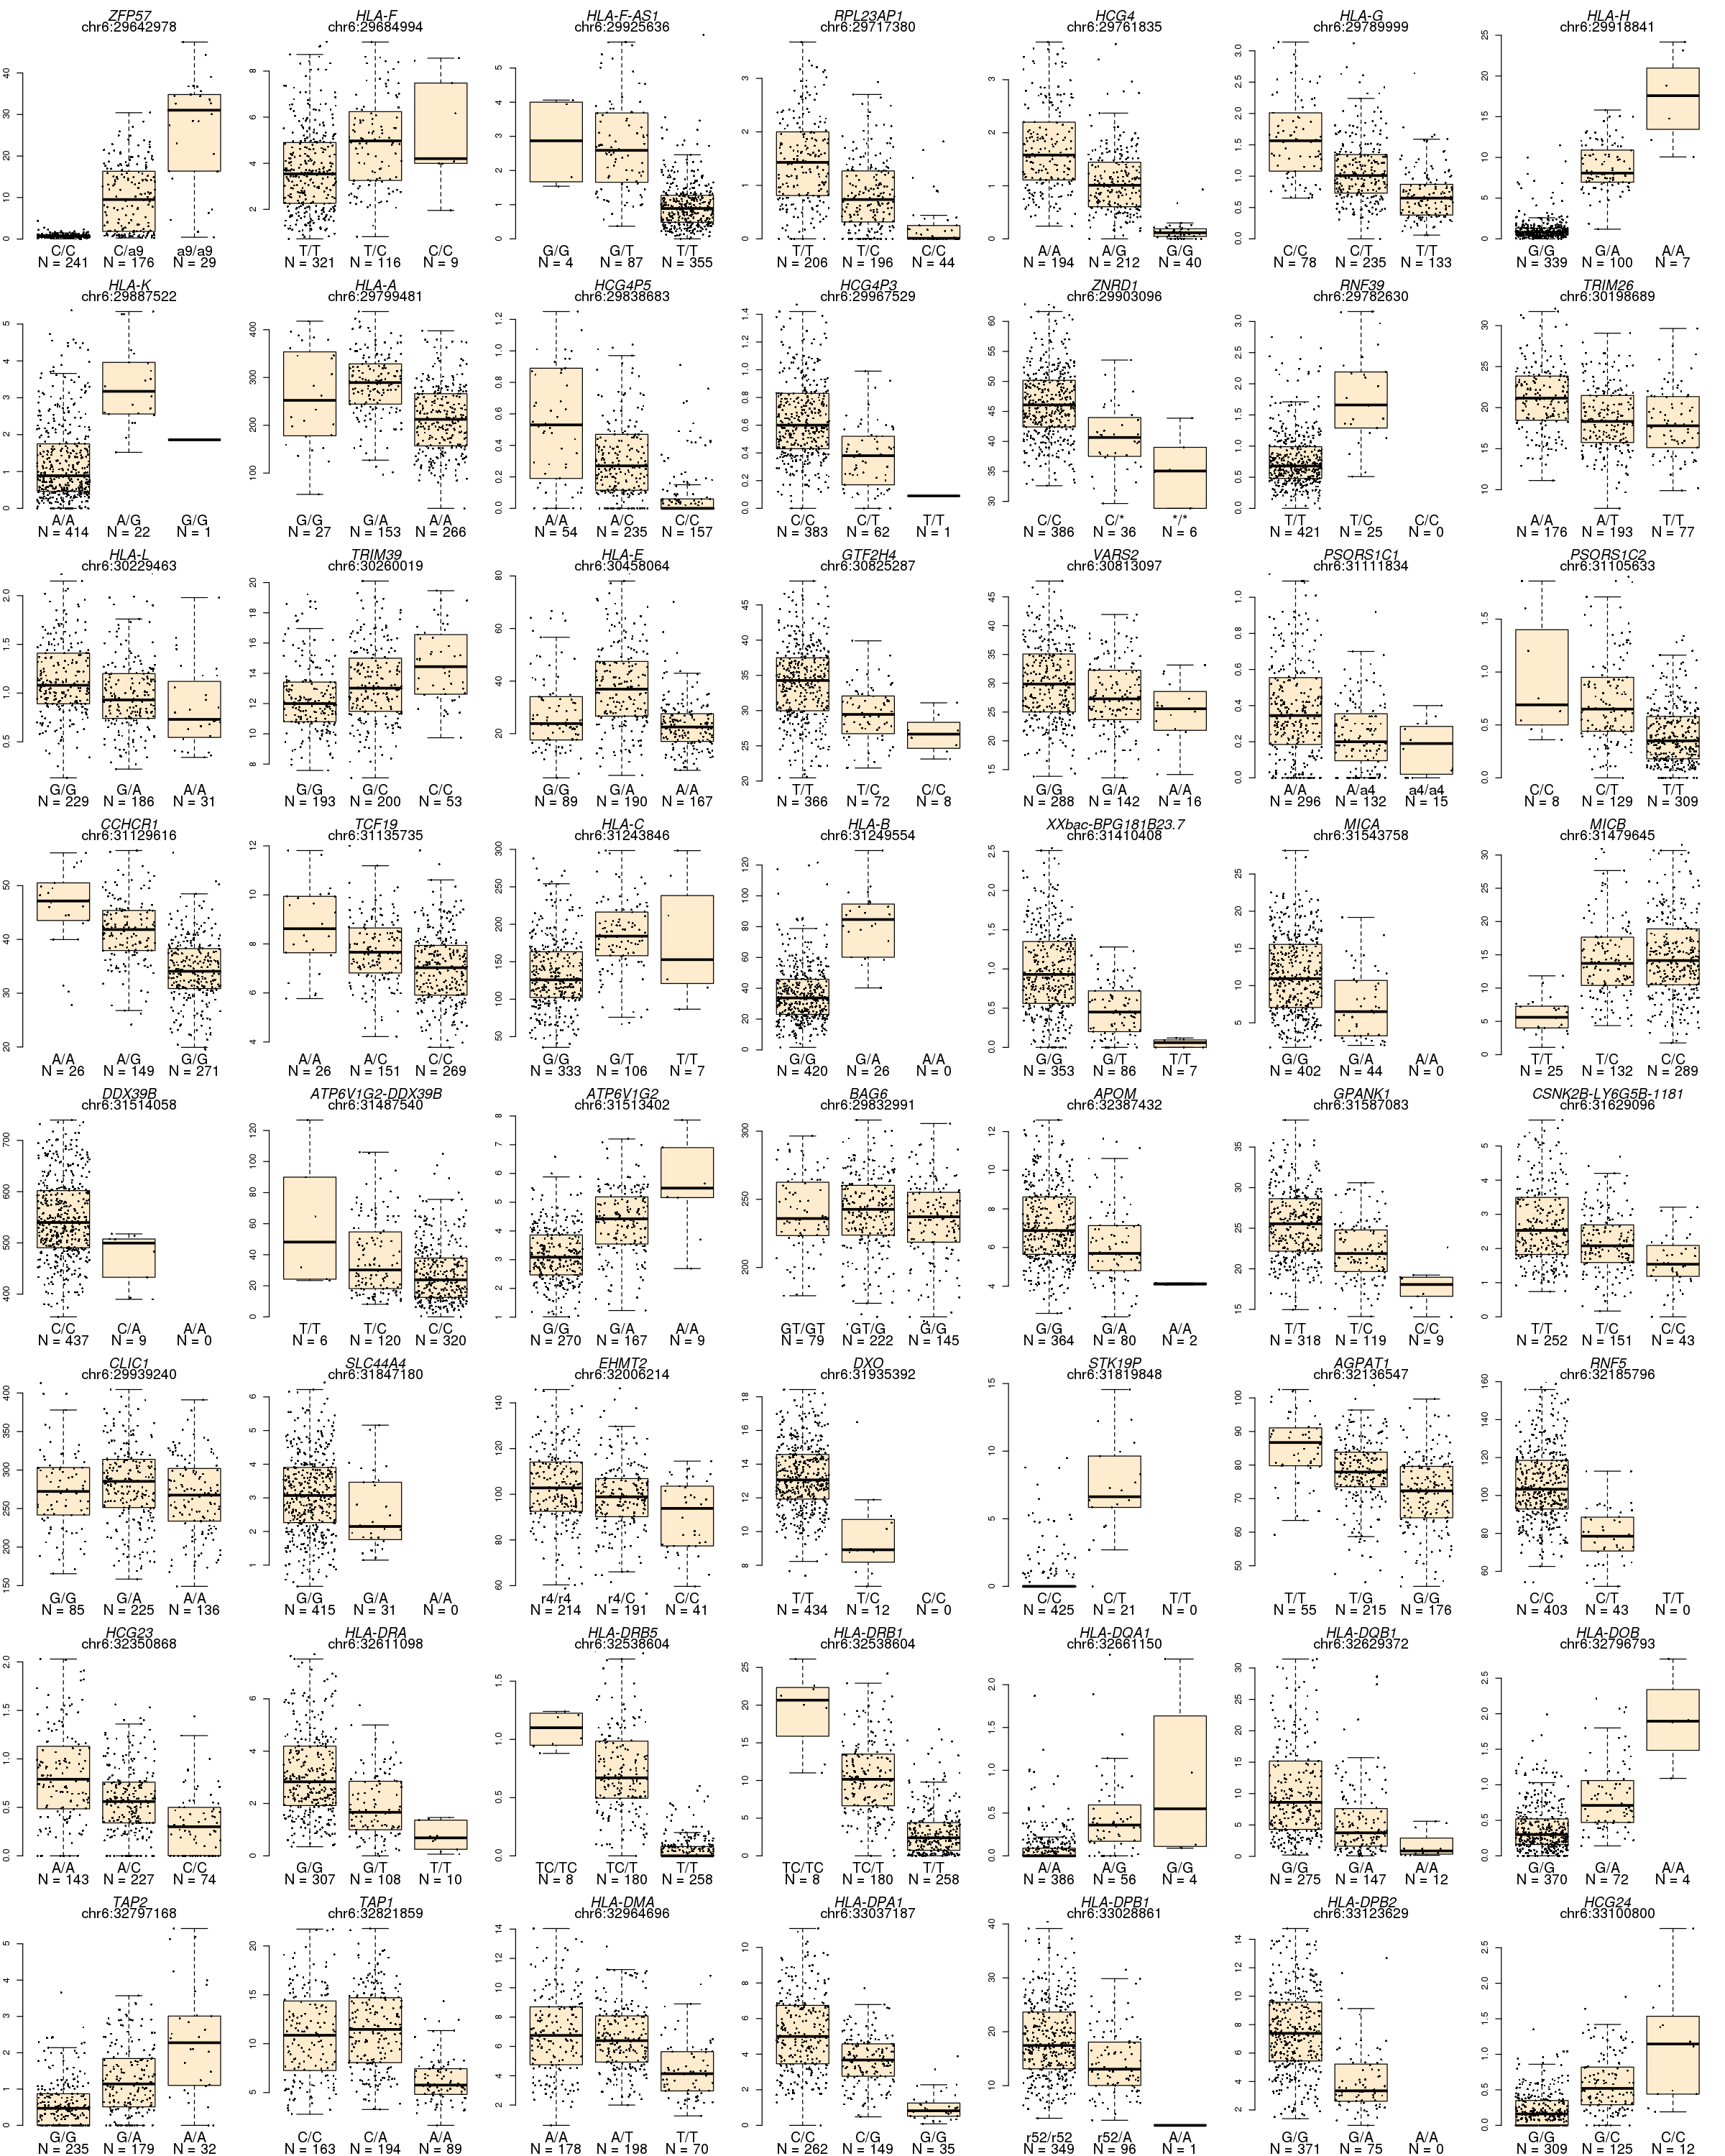

Supplement: supp [file elife-48476-supp-v1.zip › elife_poa_e48476_Figure_4_figure_supplement_2.jpg]

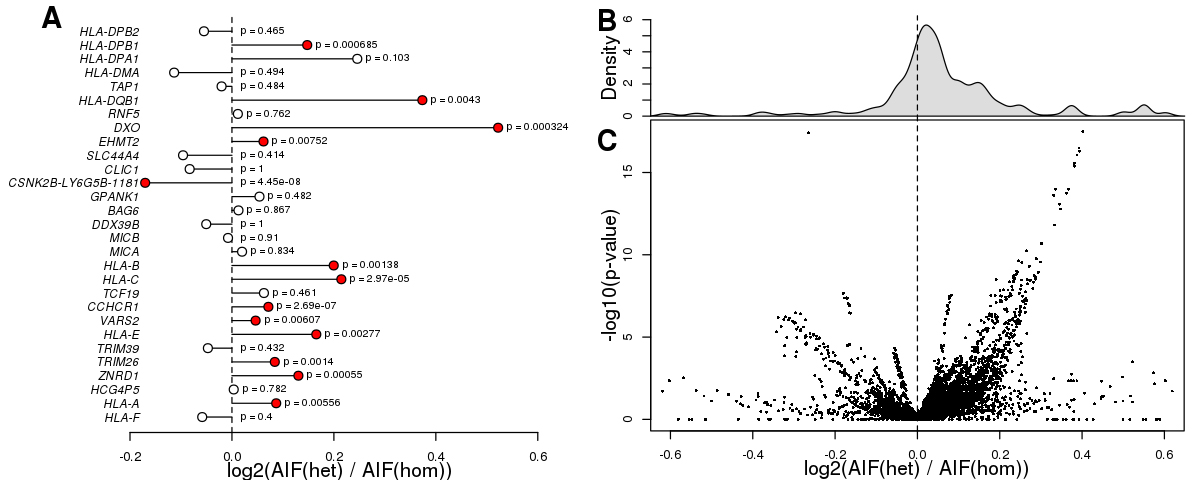

Supplement: supp [file elife-48476-supp-v1.zip › elife_poa_e48476_Figure_4_figure_supplement_5.jpg]

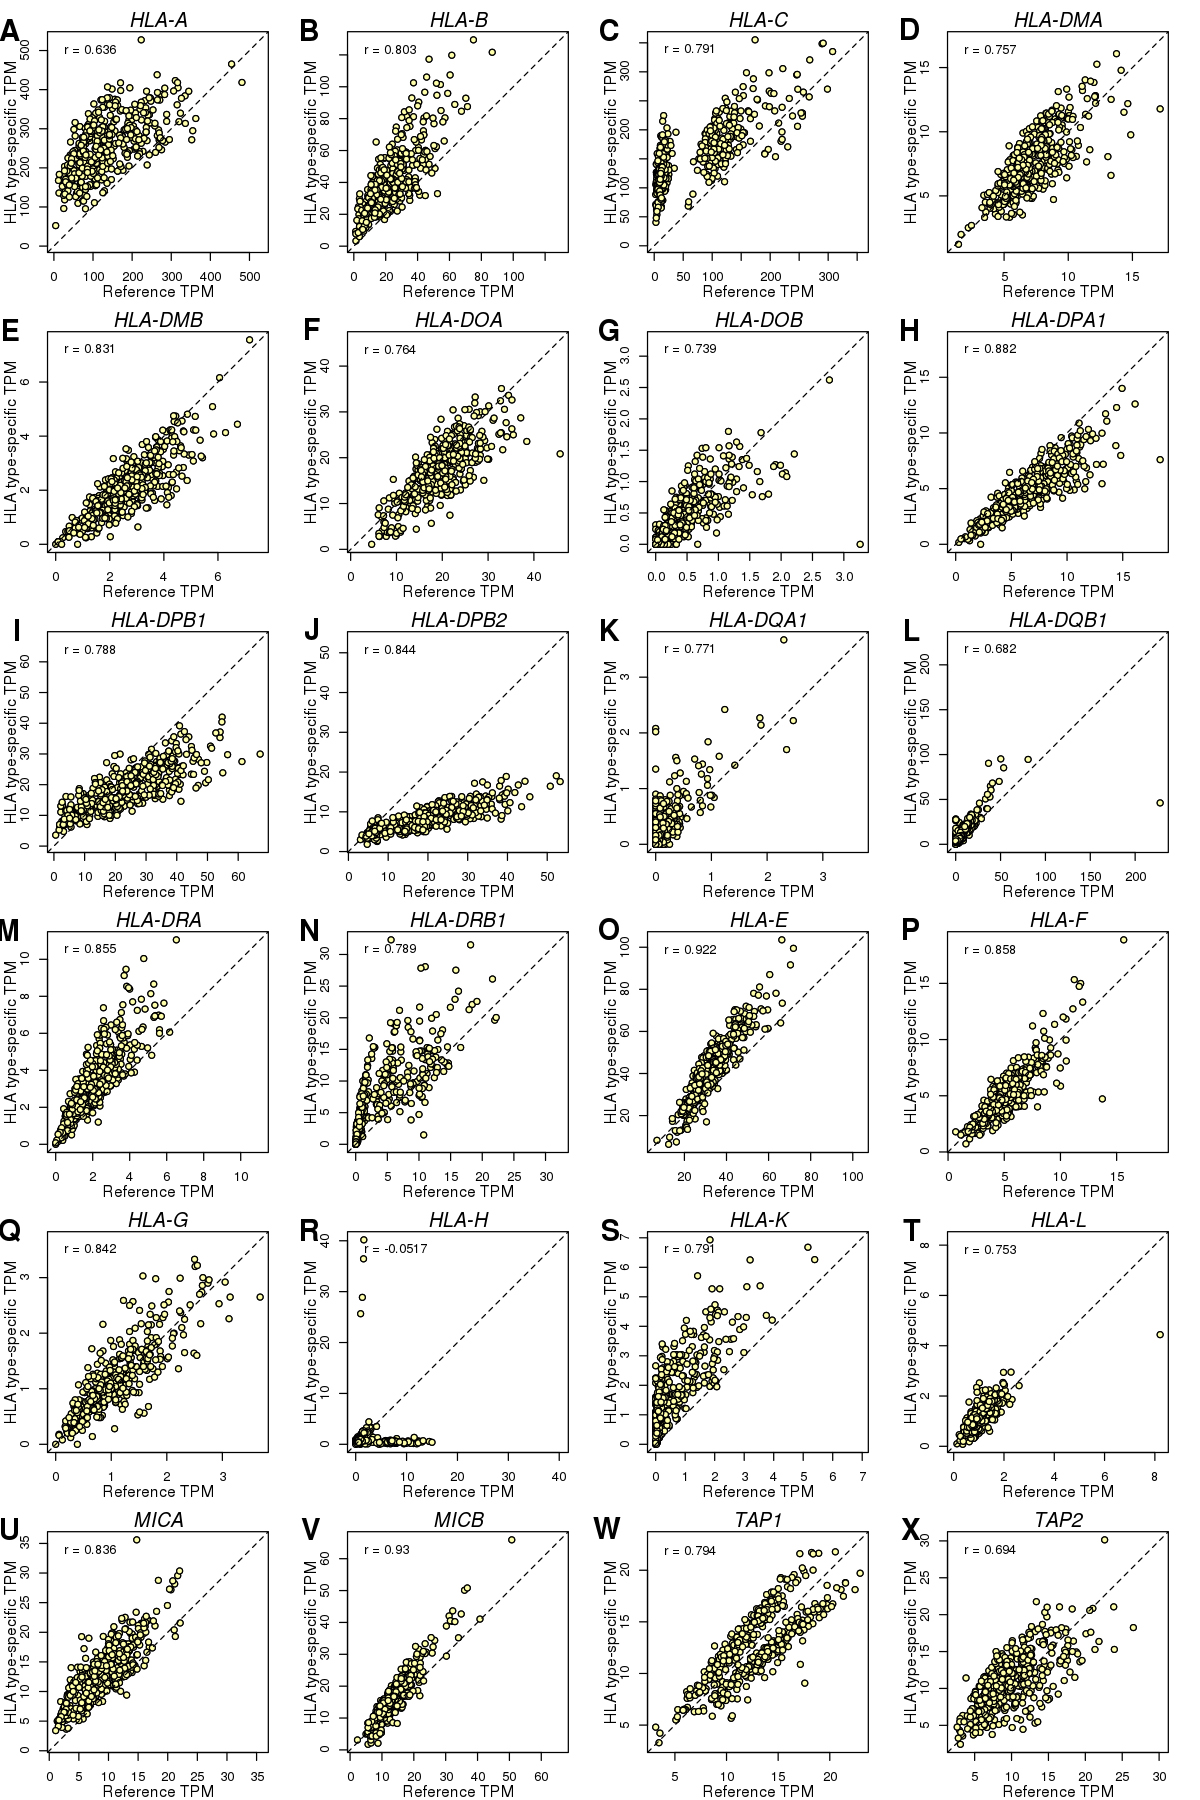

Supplement: supp [file elife-48476-supp-v1.zip › elife_poa_e48476_Figure_3_figure_supplement_2.jpg]
